# Supplementary material for: Interferon-α and -β subtypes have temporally distinct roles in containing viral spread and protecting vital organs
Source: Research Square preprint supplement (doi:10.21203/rs.3.rs-9077466/v1), 2026-04-08
Supplement: Supplementary file 1 [file 1fc36d3d9f04453642b9c8aa.xlsx]

## Sheet: WT naïve vs WT ECTV clu2 NK
	p_val	avg_log2FC	pct.1	pct.2	p_val_adj	cluster		high in naïve WT (-)	high in WT ECTV 1 dpi (+)
Sardh	0.00065057	-4.76149	0	0.013	1	2
Rhbdl3	0.00850761	-3.44411	0.003	0.016	1	2
Slc18a2	0.00269282	-3.39699	0.003	0.018	1	2
Dnase1l3	0.0103118	-3.14156	0.001	0.01	1	2
Zfp583	0.00298118	-3.11774	0.002	0.016	1	2
Bend5	0.0015279	-3.05561	0.003	0.019	1	2
Adcy6	0.010288	-2.9805	0.001	0.01	1	2
Tjp1	0.0149906	-2.81242	0.003	0.014	1	2
Arc	0.0103597	-2.77527	0.001	0.01	1	2
Igsf3	0.0178542	-2.69436	0.002	0.012	1	2
Il27	0.0149372	-2.67225	0.003	0.014	1	2
Pdf	0.0178893	-2.66149	0.002	0.012	1	2
Zbtb42	0.00994154	-2.65412	0.002	0.013	1	2
Commd1b	0.0104319	-2.53153	0.001	0.01	1	2
Fcrla	0.0261487	-2.39708	0.003	0.013	1	2
Ifit1	3.8224e-05	-2.33943	0.012	0.045	0.632606	2
Kif15	0.0263748	-2.29564	0.003	0.013	1	2
Uggt2	0.0180305	-2.26763	0.002	0.012	1	2
Cdc42bpa	0.0181015	-2.1083	0.002	0.012	1	2
Fkbp10	0.0104561	-2.08964	0.001	0.01	1	2
Rab30	0.0325235	-2.08428	0.002	0.01	1	2
Zfp184	0.0775464	-1.98607	0.003	0.01	1	2
Rsad2	0.000512385	-1.945	0.01	0.035	1	2
Sowahc	0.0324616	-1.93687	0.002	0.01	1	2
Fam43a	0.0204852	-1.9257	0.007	0.019	1	2
Wdr19	0.00877684	-1.8928	0.003	0.016	1	2
Tpx2	0.0327097	-1.88232	0.002	0.01	1	2
Cox5b-ps	0.0210507	-1.83336	0.004	0.016	1	2
Cd81	0.124715	-1.79653	0.007	0.014	1	2
Tcf19	0.174108	-1.78299	0.006	0.012	1	2
Dixdc1	0.0210844	-1.76388	0.004	0.016	1	2
Lhpp	0.0784061	-1.7623	0.003	0.01	1	2
Pkib	0.0784061	-1.76084	0.003	0.01	1	2
Tnfsf11	0.205648	-1.69309	0.008	0.014	1	2
Ifit3	0.00279383	-1.67872	0.027	0.056	1	2
Lysmd1	0.020763	-1.63819	0.01	0.025	1	2
Erp27	0.0325643	-1.61347	0.007	0.018	1	2
Gm5141	0.0589986	-1.61329	0.008	0.018	1	2
Tspan9	0.0357923	-1.60617	0.011	0.025	1	2
Sfxn4	0.0524734	-1.60168	0.007	0.017	1	2
4930563E22Rik	0.071454	-1.58792	0.006	0.014	1	2
BC024063	0.0790248	-1.57419	0.003	0.01	1	2
Nmnat1	0.00733461	-1.55756	0.009	0.026	1	2
Armcx6	0.0155335	-1.5524	0.003	0.014	1	2
Prss36	0.0154235	-1.54002	0.003	0.014	1	2
Ccne1	0.00506126	-1.53788	0.003	0.017	1	2
Iigp1	0.546779	-1.50978	0.016	0.019	1	2
Clec3b	0.156493	-1.49737	0.004	0.01	1	2
Abhd1	0.0590534	-1.48579	0.004	0.013	1	2
Ptgs1	0.756832	-1.48258	0.009	0.01	1	2
Bcl2l2	0.0383906	-1.46731	0.008	0.019	1	2
Mx1	0.000778116	-1.46648	0.031	0.066	1	2
Snx7	0.269755	-1.45051	0.006	0.01	1	2
Cd79b	0.0243424	-1.44584	0.017	0.034	1	2
Plekha6	0.00738081	-1.42506	0.004	0.018	1	2
Abcb4	0.283992	-1.42464	0.007	0.012	1	2
Shmt1	0.03917	-1.42156	0.012	0.026	1	2
Efcab9	0.0463889	-1.41728	0.003	0.012	1	2
Proser3	0.052541	-1.41477	0.007	0.017	1	2
Tacc3	0.0115311	-1.41173	0.009	0.025	1	2
Prpf40b	0.109826	-1.41064	0.01	0.019	1	2
Cip2a	0.0786531	-1.39456	0.003	0.01	1	2
Adamtsl1	0.112236	-1.39084	0.006	0.013	1	2
Lyz2	0.870424	-1.36236	0.085	0.087	1	2
P4htm	0.176368	-1.35838	0.006	0.012	1	2
Phf19	0.175544	-1.3571	0.006	0.012	1	2
Areg	0.00259746	-1.35313	0.017	0.041	1	2
Ogfrl1	0.00433542	-1.34291	0.011	0.031	1	2
Fzd4	0.0270634	-1.33708	0.003	0.013	1	2
Pfkm	0.0332296	-1.3333	0.007	0.018	1	2
Ifi44	0.0549866	-1.33149	0.011	0.023	1	2
Rhox8	0.0359439	-1.32877	0.004	0.014	1	2
Smyd1	0.0444411	-1.32489	0.006	0.016	1	2
Zfp637	4.41414e-05	-1.32064	0.032	0.078	0.730541	2
Tgfa	0.575147	-1.31841	0.01	0.013	1	2
Dnajc16	0.0232582	-1.30876	0.021	0.04	1	2
Tfb1m	0.0507745	-1.30656	0.016	0.03	1	2
Mitf	0.0120263	-1.30577	0.012	0.03	1	2
Rassf7	0.0500197	-1.30466	0.01	0.022	1	2
Elmod3	0.0464837	-1.28014	0.015	0.028	1	2
Lgmn	0.12762	-1.27903	0.007	0.014	1	2
Bmp8a	0.0325235	-1.27577	0.002	0.01	1	2
Slc25a22	0.0365677	-1.27495	0.017	0.032	1	2
Ccr10	0.24311	-1.2634	0.013	0.021	1	2
Pfas	0.00748672	-1.25979	0.009	0.026	1	2
Dynlt2b	0.0526764	-1.25271	0.007	0.017	1	2
Cit	0.157719	-1.25185	0.004	0.01	1	2
Pdgfa	0.565708	-1.24971	0.011	0.014	1	2
Catsperd	0.427832	-1.24884	0.01	0.014	1	2
Espn	0.185722	-1.23856	0.016	0.025	1	2
Lta	0.645622	-1.23824	0.019	0.022	1	2
Brat1	0.0745455	-1.23568	0.017	0.03	1	2
Iqcn	0.269464	-1.2174	0.006	0.01	1	2
Cxcl16	0.175544	-1.21187	0.006	0.012	1	2
Tmem86a	0.285678	-1.21165	0.007	0.012	1	2
Ptpn13	0.10884	-1.20758	0.01	0.019	1	2
Pdk2	0.3344	-1.20142	0.018	0.025	1	2
Pla1a	0.0157072	-1.18978	0.02	0.04	1	2
Zfp40	0.0390214	-1.18837	0.018	0.034	1	2
Nos3	0.157514	-1.18293	0.004	0.01	1	2
Cysltr1	0.0830954	-1.17848	0.007	0.016	1	2
Ntm	0.011843	-1.17556	0.012	0.03	1	2
Rnaset2a	6.49989e-11	-1.1644	0.121	0.242	1.07573e-06	2
Mreg	0.0637057	-1.16258	0.021	0.036	1	2
Ly86	0.0407733	-1.15443	0.012	0.026	1	2
E430018J23Rik	0.214844	-1.15288	0.009	0.016	1	2
Ly6a	0.560439	-1.15041	0.032	0.038	1	2
Wdr90	0.331819	-1.15014	0.015	0.021	1	2
Tmem101	0.0414301	-1.14299	0.026	0.044	1	2
Ryr1	0.269464	-1.1386	0.006	0.01	1	2
Oasl2	0.0178835	-1.13402	0.017	0.035	1	2
Dzank1	0.108173	-1.13218	0.018	0.03	1	2
Creb3l1	0.0721213	-1.12967	0.006	0.014	1	2
Axin2	0.139888	-1.12704	0.018	0.028	1	2
Epcam	0.240119	-1.12686	0.012	0.019	1	2
Btbd8	0.238316	-1.12545	0.012	0.019	1	2
Zfp94	0.0340432	-1.12499	0.007	0.018	1	2
Emilin2	0.0159974	-1.11122	0.008	0.022	1	2
Ppm1f	0.140418	-1.10935	0.018	0.028	1	2
Fabp5	0.00688809	-1.10643	0.03	0.057	1	2
Cmpk2	0.0643116	-1.10074	0.013	0.026	1	2
Angel1	0.0252803	-1.09854	0.008	0.021	1	2
Dlgap1	0.268884	-1.08817	0.006	0.01	1	2
Hdac10	0.0534512	-1.08778	0.017	0.031	1	2
Oasl1	0.000683139	-1.08733	0.023	0.056	1	2
Zfp874a	0.0233423	-1.08643	0.021	0.04	1	2
Apoe	0.941922	-1.08184	0.044	0.043	1	2
Rragd	0.0787769	-1.08007	0.003	0.01	1	2
Cpne5	0.114367	-1.07583	0.006	0.013	1	2
Nxt2	0.192943	-1.07128	0.019	0.028	1	2
Spp1	0.88058	-1.07064	0.013	0.014	1	2
Lrrc56	0.148512	-1.06647	0.009	0.017	1	2
Aqp11	0.412515	-1.06267	0.007	0.01	1	2
Per3	0.0692636	-1.06195	0.015	0.027	1	2
Ninl	0.0980389	-1.05881	0.004	0.012	1	2
Bace1	0.101724	-1.0454	0.009	0.018	1	2
Marchf9	0.0748928	-1.04404	0.01	0.021	1	2
Csf2	0.000209188	-1.0406	0.044	0.088	1	2
Lsmem1	0.0251142	-1.03879	0.011	0.026	1	2
Gm28557	0.581326	-1.03776	0.008	0.01	1	2
Morn2	0.0510117	-1.03727	0.016	0.03	1	2
Ncapd2	0.100769	-1.03312	0.016	0.027	1	2
Cenpt	0.0711898	-1.02952	0.016	0.028	1	2
Tatdn3	0.0357495	-1.02832	0.016	0.031	1	2
Fastk	0.00127232	-1.02756	0.06	0.102	1	2
Klhl3	0.30919	-1.0253	0.009	0.014	1	2
Gnb4	0.261576	-1.01946	0.022	0.031	1	2
Gm21972	0.296647	-1.0187	0.008	0.013	1	2
Sdr42e1	0.430721	-1.01648	0.013	0.018	1	2
Rasgrp4	0.150451	-1.01251	0.009	0.017	1	2
Coq4	0.123583	-1.00767	0.012	0.022	1	2
Ifi204	0.0618698	-1.00562	0.034	0.052	1	2
Epha6	0.270337	-1.00416	0.006	0.01	1	2
Edaradd	0.0827024	-1.00199	0.011	0.022	1	2
Tspan15	0.271211	-1.0013	0.006	0.01	1	2
Dnal4	0.0357843	-0.996691	0.016	0.031	1	2
Coq3	0.0140719	-0.996311	0.05	0.079	1	2
Crybg2	0.173008	-0.996107	0.012	0.021	1	2
Osbpl1a	0.0368265	-0.992339	0.023	0.041	1	2
Nelfcd	0.00263413	-0.990143	0.049	0.085	1	2
Togaram2	0.0865574	-0.986726	0.012	0.023	1	2
Spata48	0.313219	-0.982479	0.029	0.038	1	2
B4galt6	0.159365	-0.981592	0.004	0.01	1	2
Pfkfb2	0.433751	-0.981019	0.011	0.016	1	2
Saal1	0.0058025	-0.978218	0.045	0.076	1	2
Ccno	0.299916	-0.974098	0.008	0.013	1	2
Zfp870	0.735858	-0.971988	0.011	0.013	1	2
Slc39a8	0.420428	-0.971668	0.008	0.012	1	2
Fbxo48	0.0329595	-0.971262	0.002	0.01	1	2
Gm6710	0.071549	-0.967222	0.006	0.014	1	2
Rpl9-ps6	5.59242e-06	-0.964679	0.088	0.16	0.0925545	2
Acod1	0.429257	-0.964014	0.012	0.017	1	2
Zfp932	0.141103	-0.960568	0.008	0.016	1	2
Dnajb13	0.110376	-0.958772	0.01	0.019	1	2
Cxcl2	0.206955	-0.95809	0.02	0.03	1	2
Cmtm3	0.0687246	-0.955247	0.009	0.019	1	2
Gm2000	2.9024e-10	-0.947112	0.197	0.322	4.80347e-06	2
Slc24a3	0.270745	-0.944707	0.026	0.035	1	2
Brip1	0.428707	-0.939663	0.009	0.013	1	2
Aph1b	0.578558	-0.938422	0.01	0.013	1	2
Vps25	0.160359	-0.937955	0.01	0.018	1	2
Kifc2	0.0991315	-0.937183	0.004	0.012	1	2
Nlrx1	0.221518	-0.936429	0.009	0.016	1	2
Gm49356	0.007752	-0.936049	0.016	0.036	1	2
Coq8a	0.0480699	-0.934326	0.035	0.054	1	2
Ddc	0.0447524	-0.933654	0.006	0.016	1	2
Magi2	0.0146955	-0.933534	0.025	0.047	1	2
Fzd6	0.413252	-0.932633	0.007	0.01	1	2
Ifitm3	0.047074	-0.931639	0.015	0.028	1	2
Mybpc1	0.00555535	-0.931476	0.027	0.053	1	2
Mlycd	0.000469435	-0.929247	0.067	0.116	1	2
F13a1	0.297734	-0.927777	0.008	0.013	1	2
Hes7	0.178026	-0.927648	0.006	0.012	1	2
Tmem184b	0.0100285	-0.91814	0.063	0.096	1	2
Rdh5	0.0763288	-0.917893	0.01	0.021	1	2
Gstk1	0.0977377	-0.916592	0.015	0.026	1	2
Cd8b1	0.0100102	-0.915171	0.008	0.023	1	2
Dip2a	0.254076	-0.911352	0.018	0.026	1	2
Arhgap24	0.263626	-0.908782	0.019	0.027	1	2
Zfp28	0.0874717	-0.908755	0.012	0.023	1	2
Map7	0.00358634	-0.906396	0.025	0.052	1	2
Tbc1d32	0.0385096	-0.906357	0.017	0.032	1	2
Srp54c	0.00626295	-0.901641	0.027	0.053	1	2
Matcap1	0.110046	-0.901046	0.01	0.019	1	2
Hdac3	0.00195884	-0.900378	0.073	0.116	1	2
Ccdc14	0.577324	-0.899461	0.009	0.012	1	2
Alg13	0.000403346	-0.897856	0.046	0.089	1	2
Mark4	0.00212375	-0.893949	0.048	0.085	1	2
Zfp113	0.0341655	-0.892615	0.031	0.052	1	2
Kcnk2	0.129093	-0.892056	0.007	0.014	1	2
Tcp11	0.0797726	-0.889103	0.003	0.01	1	2
Nupl2	0.0249463	-0.887832	0.021	0.04	1	2
Them6	0.0104449	-0.887553	0.043	0.071	1	2
Chek2	0.050466	-0.886918	0.01	0.022	1	2
Mtss1	0.0123423	-0.885963	0.012	0.03	1	2
Igfbp6	0.235011	-0.884814	0.011	0.018	1	2
Tnfaip2	0.193842	-0.88402	0.007	0.013	1	2
Fam234a	0.0219105	-0.883722	0.051	0.079	1	2
Ugt1a7c	0.415836	-0.881849	0.007	0.01	1	2
ENSMUSG00000079800	0.415466	-0.880071	0.007	0.01	1	2
Gm49450	0.854125	-0.879774	0.017	0.016	1	2
Katnbl1	0.0128711	-0.876843	0.038	0.065	1	2
Cox15	0.0470107	-0.874501	0.036	0.056	1	2
Fbxo5	0.130177	-0.874193	0.013	0.023	1	2
Tmem41a	0.422173	-0.87264	0.008	0.012	1	2
Slc25a13	0.405988	-0.870736	0.027	0.034	1	2
Serpinb1a	0.00870018	-0.868778	0.017	0.038	1	2
Fbxo36	0.288219	-0.86765	0.007	0.012	1	2
Gm1123	0.422872	-0.863605	0.008	0.012	1	2
Copz2	0.0839091	-0.861103	0.007	0.016	1	2
Csrp2	0.440601	-0.857683	0.012	0.017	1	2
Usp18	0.0345612	-0.856632	0.063	0.089	1	2
Mctp1	0.0937388	-0.851159	0.022	0.036	1	2
Lrrc51	0.0521147	-0.85084	0.016	0.03	1	2
9130023H24Rik	0.138653	-0.850369	0.015	0.025	1	2
Trpm4	0.0556059	-0.849643	0.017	0.031	1	2
Aars2	0.0271004	-0.847964	0.006	0.017	1	2
Tagap1	0.114431	-0.847088	0.02	0.032	1	2
Rsad1	0.681417	-0.84625	0.017	0.019	1	2
Top1mt	0.256307	-0.84579	0.027	0.036	1	2
Ice2	0.0498305	-0.845662	0.039	0.06	1	2
Pgap3	0.0798657	-0.842955	0.018	0.031	1	2
Tada2a	0.105636	-0.84099	0.017	0.028	1	2
Krt10	0.648332	-0.839746	0.02	0.023	1	2
Retnlg	0.428374	-0.839689	0.009	0.013	1	2
Cd68	0.185869	-0.837929	0.015	0.023	1	2
Rft1	0.332749	-0.836187	0.021	0.028	1	2
Ppox	0.0626963	-0.835507	0.037	0.056	1	2
Mon1b	0.0779947	-0.834688	0.035	0.052	1	2
Lmtk3	0.168164	-0.83435	0.011	0.019	1	2
Ifi27l2a	0.238898	-0.834035	0.078	0.093	1	2
Bbs12	0.150751	-0.832943	0.009	0.017	1	2
Fpgt	0.0378806	-0.830801	0.041	0.063	1	2
Bphl	0.0107122	-0.830398	0.045	0.074	1	2
Tceanc	0.135365	-0.829565	0.015	0.025	1	2
Slc4a8	0.299916	-0.829004	0.008	0.013	1	2
Ube2e2	0.15638	-0.825745	0.021	0.032	1	2
Nutf2-ps1	0.310247	-0.823523	0.009	0.014	1	2
Stxbp1	0.111113	-0.820828	0.018	0.03	1	2
Tnpo2	0.101632	-0.819929	0.043	0.06	1	2
Lyrm7	0.149004	-0.81972	0.018	0.028	1	2
Bik	0.413989	-0.816751	0.007	0.01	1	2
Dhfr	0.0909779	-0.816357	0.022	0.036	1	2
Ramp3	0.928146	-0.816354	0.011	0.012	1	2
Creld1	0.0510286	-0.816273	0.01	0.022	1	2
Slc25a10	0.325186	-0.814985	0.012	0.018	1	2
Tmem158	0.328534	-0.814023	0.012	0.018	1	2
Mtrr	0.0903399	-0.812356	0.022	0.036	1	2
Hpse	0.300736	-0.812116	0.008	0.013	1	2
Spi1	0.0823725	-0.809996	0.011	0.022	1	2
Ccdc43	0.000862821	-0.809847	0.059	0.103	1	2
Rhno1	0.021817	-0.808786	0.035	0.058	1	2
Plbd1	0.0600134	-0.806816	0.004	0.013	1	2
Phf11a	0.206205	-0.806427	0.032	0.044	1	2
Zfp597	0.109661	-0.806302	0.055	0.072	1	2
Garin3	0.114224	-0.804249	0.006	0.013	1	2
Rpusd2	0.414727	-0.803713	0.007	0.01	1	2
H2-Aa	0.051856	-0.803654	0.074	0.101	1	2
Sdr39u1	0.0225027	-0.802001	0.036	0.06	1	2
Vat1	0.156939	-0.801769	0.022	0.034	1	2
Tbc1d19	0.143837	-0.797509	0.016	0.026	1	2
Ncf1	0.00827663	-0.796967	0.026	0.05	1	2
Mapk3	8.76385e-05	-0.796301	0.112	0.177	1	2
Rwdd3	0.428117	-0.794299	0.019	0.025	1	2
Tars2	0.31991	-0.794153	0.032	0.041	1	2
Ptrh1	0.272087	-0.793493	0.006	0.01	1	2
Meak7	0.129685	-0.790952	0.007	0.014	1	2
Kcnab1	0.584555	-0.790534	0.009	0.012	1	2
Uhrf1bp1	0.434965	-0.790389	0.011	0.016	1	2
Uros	0.0334811	-0.789919	0.02	0.038	1	2
Galns	0.038337	-0.789773	0.023	0.041	1	2
Oas3	0.0650166	-0.788857	0.02	0.035	1	2
Intu	0.28737	-0.788842	0.007	0.012	1	2
Rps27rt	1.0235e-09	-0.788265	0.243	0.376	1.69388e-05	2
Nsmf	0.0269859	-0.787995	0.034	0.056	1	2
Oas1a	0.0186054	-0.781566	0.044	0.07	1	2
Kics2	0.0674849	-0.780746	0.022	0.038	1	2
D17H6S53E	0.629748	-0.779332	0.022	0.026	1	2
Tbl2	0.463398	-0.778855	0.031	0.038	1	2
Zfp90	0.15464	-0.776825	0.02	0.031	1	2
Apoo	0.0516988	-0.775969	0.025	0.041	1	2
Tlr6	0.158334	-0.775694	0.004	0.01	1	2
Trim62	0.0368759	-0.772965	0.016	0.031	1	2
Spink10	0.140105	-0.772236	0.016	0.026	1	2
5730409E04Rik	0.287653	-0.771026	0.007	0.012	1	2
Tmem267	0.581978	-0.769128	0.01	0.013	1	2
Rnaset2b	7.21421e-06	-0.768038	0.179	0.266	0.119395	2
Cdc20	0.839839	-0.767478	0.01	0.009	1	2
Cryzl2	0.0224361	-0.764827	0.019	0.038	1	2
Akap12	0.0987207	-0.762448	0.004	0.012	1	2
Nrg4	0.272087	-0.760331	0.006	0.01	1	2
Naa80	0.176716	-0.759113	0.012	0.021	1	2
Idh2	0.0244145	-0.758365	0.043	0.067	1	2
Dvl2	0.0319933	-0.757788	0.038	0.061	1	2
Galc	0.329084	-0.756907	0.045	0.054	1	2
Ntrk3	0.262925	-0.754328	0.025	0.034	1	2
Mturn	0.0344312	-0.752704	0.03	0.05	1	2
Stradb	0.119317	-0.748776	0.022	0.035	1	2
Btla	0.238885	-0.748509	0.012	0.019	1	2
Slfn5	0.134112	-0.747299	0.04	0.056	1	2
Car12	0.195506	-0.747066	0.007	0.013	1	2
Capn3	0.423571	-0.74658	0.008	0.012	1	2
Arhgap11a	0.235987	-0.743256	0.011	0.018	1	2
Ptprs	0.164517	-0.742596	0.028	0.04	1	2
1700030K09Rik	0.0461427	-0.741304	0.009	0.021	1	2
Dmd	0.152864	-0.740649	0.009	0.017	1	2
Tnfrsf25	0.0573013	-0.738816	0.028	0.045	1	2
Dclre1b	0.331594	-0.737498	0.015	0.021	1	2
Sirt4	0.120456	-0.734029	0.011	0.021	1	2
Trpc1	0.334848	-0.733733	0.019	0.026	1	2
Tmem120a	0.0865043	-0.733237	0.041	0.06	1	2
Adam12	0.420661	-0.730853	0.007	0.01	1	2
Man2b2	0.130378	-0.729301	0.029	0.043	1	2
Bst2	0.0421583	-0.728905	0.245	0.281	1	2
Ulk4	0.573236	-0.725252	0.011	0.014	1	2
Pard6a	0.0533423	-0.723347	0.06	0.084	1	2
Dram1	0.327096	-0.723217	0.012	0.018	1	2
Gm2a	0.00346666	-0.722613	0.07	0.111	1	2
Tmem276	0.0518078	-0.721743	0.047	0.069	1	2
Cilk1	0.168422	-0.721276	0.028	0.04	1	2
Pls1	0.528626	-0.719977	0.012	0.009	1	2
Naprt	0.432224	-0.719858	0.016	0.021	1	2
Gfpt2	0.317396	-0.719659	0.01	0.016	1	2
Mylpf	0.160817	-0.719361	0.023	0.035	1	2
Or2v1	0.00918779	-0.717835	0.021	0.044	1	2
Mrpl10	0.0457736	-0.717014	0.072	0.098	1	2
Hdac5	0.0257752	-0.716944	0.047	0.072	1	2
Arhgap32	0.272672	-0.716287	0.006	0.01	1	2
Cacna1d	0.436801	-0.713184	0.012	0.017	1	2
H2-Eb1	0.0625004	-0.71191	0.083	0.109	1	2
Myadm	0.133911	-0.7114	0.015	0.025	1	2
Ska2	0.0366464	-0.708546	0.031	0.052	1	2
Pigo	0.200925	-0.708316	0.021	0.031	1	2
Map3k12	0.567905	-0.708052	0.012	0.016	1	2
Asph	0.0691683	-0.706611	0.05	0.071	1	2
Gale	0.32787	-0.705932	0.011	0.017	1	2
Lclat1	0.00135702	-0.705453	0.072	0.118	1	2
Tsen54	0.0786616	-0.703201	0.035	0.052	1	2
U2af1l4	0.163999	-0.703106	0.025	0.036	1	2
H2-Ab1	0.0843818	-0.701923	0.089	0.115	1	2
Prickle3	0.0143441	-0.70095	0.043	0.07	1	2
Ubox5	0.714969	-0.69988	0.013	0.016	1	2
Pla2g2d	0.159571	-0.699617	0.004	0.01	1	2
Tbc1d8b	0.0607897	-0.699504	0.058	0.082	1	2
Thap7	0.00496396	-0.6982	0.064	0.101	1	2
Klhl22	0.0612575	-0.696961	0.034	0.052	1	2
Nepro	0.332142	-0.695979	0.018	0.025	1	2
Carm1	0.0260816	-0.695909	0.045	0.07	1	2
Septin8	0.682804	-0.695904	0.016	0.018	1	2
Slc16a7	0.0979091	-0.694969	0.015	0.026	1	2
Tnfrsf13b	0.33765	-0.694851	0.022	0.03	1	2
Sf3a2	0.020492	-0.694092	0.076	0.107	1	2
Zfp516	0.405256	-0.693344	0.028	0.035	1	2
Gbp6	0.185434	-0.692041	0.015	0.023	1	2
Adgrl1	0.0746609	-0.691428	0.026	0.041	1	2
Trmt61a	0.266333	-0.690053	0.019	0.027	1	2
Pomt2	0.692631	-0.690014	0.015	0.017	1	2
Ikbip	0.0811354	-0.689702	0.053	0.072	1	2
Ftl1-ps1	0.046106	-0.689419	0.013	0.027	1	2
Sema6d	0.170817	-0.687326	0.041	0.056	1	2
Elmod2	0.320382	-0.686802	0.03	0.039	1	2
Prim1	0.0456753	-0.686109	0.028	0.047	1	2
Rcan3	0.424973	-0.685764	0.008	0.012	1	2
Det1	0.128285	-0.68335	0.029	0.043	1	2
Sgms1	0.682851	-0.683207	0.057	0.061	1	2
Gcsh	0.0232406	-0.682585	0.05	0.078	1	2
Rtl8a	0.0905716	-0.682253	0.038	0.056	1	2
Btbd6	0.33069	-0.682121	0.023	0.031	1	2
Irgq	0.258435	-0.681617	0.016	0.023	1	2
Mrps2	0.181527	-0.680358	0.013	0.022	1	2
Pop7	0.00188308	-0.680197	0.109	0.16	1	2
Ifit2	0.009522	-0.678716	0.037	0.065	1	2
Tmem14a	0.055024	-0.678121	0.025	0.041	1	2
5430403G16Rik	0.0581711	-0.676807	0.027	0.044	1	2
Gid8	0.0132766	-0.676783	0.119	0.158	1	2
Apool	0.00372264	-0.674341	0.102	0.147	1	2
Ciao1	0.0233711	-0.673929	0.076	0.107	1	2
Zbtb21	0.0884098	-0.673669	0.04	0.058	1	2
Ech1	1.34346e-06	-0.672192	0.213	0.31	0.0222343	2
Fancf	0.264082	-0.671174	0.022	0.031	1	2
Wdr38	0.424973	-0.670877	0.008	0.012	1	2
Urb1	0.586661	-0.67078	0.028	0.032	1	2
Acad8	0.105724	-0.670651	0.038	0.054	1	2
Col8a2	0.0380389	-0.670414	0.022	0.04	1	2
Ccdc180	0.304311	-0.669221	0.008	0.013	1	2
Mrm2	0.335223	-0.668547	0.018	0.025	1	2
Zfp951	0.202629	-0.666851	0.04	0.053	1	2
Tbcc	0.00797134	-0.666714	0.05	0.083	1	2
Alg12	0.0275166	-0.665814	0.032	0.054	1	2
Ndufaf7	0.0223349	-0.665524	0.103	0.138	1	2
Teddm2	0.327122	-0.66445	0.011	0.017	1	2
Cpeb3	0.208185	-0.664353	0.023	0.034	1	2
Tpm3-rs7	0.424973	-0.663649	0.008	0.012	1	2
Armc9	0.0334034	-0.663264	0.046	0.07	1	2
Cadm1	0.575526	-0.66242	0.01	0.013	1	2
H2ac15	0.437968	-0.662143	0.012	0.017	1	2
Amer1	0.206159	-0.659995	0.022	0.032	1	2
Pigw	0.434903	-0.658962	0.013	0.018	1	2
Cd63	0.32538	-0.658206	0.011	0.017	1	2
Car7	0.95881	-0.65794	0.026	0.026	1	2
Nanp	0.797237	-0.657605	0.038	0.04	1	2
Ifi213	0.000368435	-0.656784	0.122	0.185	1	2
Srd5a3	0.0158798	-0.655206	0.077	0.111	1	2
Inafm1	0.413244	-0.654904	0.025	0.031	1	2
Gm21985	0.565587	-0.65387	0.013	0.017	1	2
Myo1b	0.262448	-0.653644	0.019	0.027	1	2
Mapk7	0.183894	-0.652103	0.013	0.022	1	2
9030025P20Rik	0.198422	-0.651897	0.018	0.027	1	2
Depdc1b	0.583146	-0.65151	0.009	0.012	1	2
Exo5	0.0635657	-0.651346	0.019	0.034	1	2
Ifi214	0.0169014	-0.65131	0.084	0.119	1	2
1700010I14Rik	0.19912	-0.651151	0.018	0.027	1	2
Fance	0.02771	-0.650752	0.049	0.075	1	2
Snx33	0.0851483	-0.650577	0.019	0.032	1	2
Brca2	0.263457	-0.650274	0.019	0.027	1	2
Sap30	0.0831219	-0.650134	0.051	0.071	1	2
Agbl3	0.0708977	-0.649638	0.023	0.039	1	2
N4bp2	0.00920542	-0.648934	0.077	0.114	1	2
Pcbp4	0.176567	-0.648915	0.012	0.021	1	2
Zfp33b	0.0255501	-0.64832	0.041	0.066	1	2
Lxn	0.0524543	-0.647923	0.016	0.03	1	2
Abhd11	0.0306759	-0.647694	0.063	0.091	1	2
Agbl5	0.532575	-0.646747	0.019	0.023	1	2
Ier5l	0.15355	-0.645737	0.075	0.093	1	2
0610009B22Rik	0.0123833	-0.645329	0.034	0.06	1	2
Rnf135	0.0286586	-0.645023	0.023	0.043	1	2
Tbrg4	0.208005	-0.644502	0.044	0.057	1	2
Mzt2	0.411637	-0.644112	0.023	0.03	1	2
Pola2	0.0627767	-0.64398	0.074	0.098	1	2
Akap17b	0.0942935	-0.641847	0.023	0.038	1	2
Tmem250-ps	0.122271	-0.639583	0.021	0.034	1	2
Iba57	0.120002	-0.638985	0.011	0.021	1	2
Spc25	0.87819	-0.638637	0.013	0.014	1	2
Pald1	0.308875	-0.637258	0.039	0.049	1	2
Rgs10	0.00543506	-0.636829	0.105	0.15	1	2
Htatip2	0.00906737	-0.636822	0.117	0.159	1	2
Zbp1	0.01042	-0.635808	0.185	0.233	1	2
Rp2	0.0309227	-0.635647	0.05	0.076	1	2
Adam9	0.115198	-0.634582	0.065	0.084	1	2
Med12l	0.167248	-0.634294	0.043	0.057	1	2
Vegfb	0.207371	-0.631856	0.035	0.047	1	2
Herc6	0.261732	-0.631839	0.17	0.188	1	2
Cep55	0.142609	-0.631458	0.008	0.016	1	2
Zfp219	0.141571	-0.629153	0.034	0.048	1	2
Gm53012	0.143951	-0.628016	0.016	0.026	1	2
Dgcr6	0.161519	-0.62771	0.022	0.034	1	2
Zfp777	0.252265	-0.627535	0.04	0.052	1	2
Capn10	0.104358	-0.626535	0.027	0.041	1	2
Aif1	0.273258	-0.626394	0.006	0.01	1	2
Primpol	0.112822	-0.62599	0.077	0.098	1	2
Acad11	0.0658401	-0.624258	0.02	0.035	1	2
Abhd14b	0.168138	-0.623167	0.032	0.045	1	2
Acox3	0.0891509	-0.623154	0.062	0.083	1	2
Zfp688	0.0296453	-0.622926	0.054	0.08	1	2
Tubd1	0.125385	-0.622788	0.023	0.036	1	2
6030458C11Rik	0.0188834	-0.621576	0.086	0.12	1	2
Irag1	0.239834	-0.62148	0.012	0.019	1	2
9930111J21Rik1	0.220294	-0.618233	0.009	0.016	1	2
Slc25a15	0.416576	-0.618149	0.007	0.01	1	2
Sbsn	0.547074	-0.61802	0.017	0.021	1	2
Ahcy	0.257171	-0.616722	0.016	0.023	1	2
Slc35f5	0.88661	-0.61427	0.018	0.017	1	2
Fam83f	0.7665	-0.61199	0.009	0.01	1	2
Slc25a26	0.264704	-0.611572	0.055	0.067	1	2
Kif24	0.329975	-0.610505	0.012	0.018	1	2
Stam	0.0374973	-0.610485	0.077	0.106	1	2
Snrnp25	0.00768576	-0.609918	0.117	0.16	1	2
Asf1b	0.341562	-0.609819	0.015	0.021	1	2
Gm10509	0.0107649	-0.608935	0.056	0.089	1	2
Epop	0.0697759	-0.608722	0.015	0.027	1	2
Ccdc62	0.544121	-0.607098	0.018	0.022	1	2
Zfp523	0.153843	-0.604941	0.018	0.028	1	2
Aldh3a2	0.0453998	-0.604929	0.075	0.102	1	2
F2rl1	0.110014	-0.602566	0.017	0.028	1	2
Armc5	0.109524	-0.601895	0.035	0.05	1	2
Agl	0.399951	-0.601461	0.031	0.039	1	2
Slc35a4	0.0102353	-0.601394	0.082	0.119	1	2
Ice1	0.0063527	-0.599421	0.114	0.159	1	2
Maged2	0.165164	-0.598133	0.026	0.038	1	2
Mogs	0.00652282	-0.598077	0.079	0.119	1	2
Ptov1	0.158129	-0.597117	0.004	0.01	1	2
Themis2	0.417688	-0.596886	0.007	0.01	1	2
Purg	0.134755	-0.596254	0.032	0.047	1	2
D11Wsu47e	0.205113	-0.596166	0.02	0.03	1	2
Rit1	0.0126754	-0.594141	0.085	0.122	1	2
Uhrf1	0.289069	-0.593831	0.007	0.012	1	2
Klhl5	0.196972	-0.593302	0.068	0.084	1	2
Zfp46	0.130429	-0.592846	0.007	0.014	1	2
Tirap	0.270627	-0.592521	0.027	0.036	1	2
Cplane2	0.418059	-0.592067	0.007	0.01	1	2
Tmem115	0.165762	-0.591908	0.053	0.069	1	2
Basp1	0.0355316	-0.591142	0.049	0.074	1	2
Fam234b	0.176268	-0.589993	0.012	0.021	1	2
Atosb	0.214273	-0.589814	0.027	0.038	1	2
Prss12	0.557805	-0.589634	0.015	0.018	1	2
Tulp2	0.5597	-0.589416	0.013	0.017	1	2
Ift74	0.423455	-0.588917	0.023	0.03	1	2
Ccnj	0.773946	-0.588551	0.04	0.043	1	2
Lactb	0.00234347	-0.588081	0.106	0.157	1	2
Cldn34c1	0.835315	-0.587534	0.016	0.017	1	2
Dbn1	0.851746	-0.587172	0.016	0.017	1	2
Rad1	0.0267039	-0.587142	0.03	0.052	1	2
Chit1	0.695633	-0.586254	0.016	0.018	1	2
Dhx32	0.53774	-0.585961	0.036	0.041	1	2
Phf11b	0.00149451	-0.585775	0.125	0.18	1	2
Rsph3a	0.502866	-0.585771	0.025	0.03	1	2
Tmem177	0.429346	-0.585315	0.018	0.023	1	2
Itpripl1	0.620264	-0.584956	0.025	0.028	1	2
Fbxl18	0.253418	-0.58474	0.015	0.022	1	2
Phldb3	0.0500731	-0.584463	0.015	0.028	1	2
Adgra3	0.437869	-0.584454	0.015	0.019	1	2
Alpk2	0.165737	-0.584197	0.031	0.044	1	2
Oas1b	0.0389363	-0.584141	0.022	0.04	1	2
Snx32	0.175041	-0.583187	0.034	0.047	1	2
Mlh1	0.387111	-0.582509	0.051	0.061	1	2
Mroh1	0.0660029	-0.582473	0.069	0.093	1	2
Mtm1	0.0568989	-0.581296	0.067	0.092	1	2
Gan	0.1364	-0.581243	0.038	0.053	1	2
Rnf123	0.0268678	-0.580788	0.11	0.146	1	2
Zfp358	0.584323	-0.580203	0.008	0.01	1	2
Tyms	0.0306846	-0.579507	0.025	0.044	1	2
Pes1	0.0426851	-0.579039	0.07	0.097	1	2
H1f3	0.17942	-0.578376	0.117	0.138	1	2
Atmin	0.0546041	-0.577287	0.025	0.041	1	2
Spata2	0.444767	-0.575641	0.053	0.061	1	2
Lrrc45	0.322484	-0.574445	0.035	0.044	1	2
Uevld	0.266012	-0.572382	0.027	0.036	1	2
Tmem108	0.271909	-0.572141	0.034	0.044	1	2
Dglucy	0.103594	-0.57213	0.072	0.093	1	2
Hsh2d	0.029153	-0.571997	0.044	0.069	1	2
Thtpa	0.168481	-0.571336	0.03	0.043	1	2
Pik3c3	0.0198125	-0.571173	0.123	0.162	1	2
Tsen34	0.0312385	-0.571004	0.072	0.101	1	2
Eng	0.583347	-0.570442	0.009	0.012	1	2
Evi5l	0.310994	-0.57023	0.034	0.043	1	2
Ipo4	0.15169	-0.570201	0.018	0.028	1	2
Cd74	0.0946039	-0.570145	0.204	0.239	1	2
Ifi206	0.00359638	-0.569877	0.197	0.256	1	2
Eno3	0.334184	-0.56886	0.013	0.019	1	2
Trim30d	0.0107225	-0.568155	0.113	0.157	1	2
Daxx	0.172508	-0.566756	0.081	0.1	1	2
Slc39a13	0.415094	-0.566334	0.025	0.031	1	2
Nup107	0.18753	-0.566191	0.059	0.075	1	2
Glcci1	0.0861295	-0.565924	0.037	0.054	1	2
Nrp2	0.236966	-0.565431	0.011	0.018	1	2
Mterf1b	0.340625	-0.564255	0.016	0.022	1	2
Gins3	0.1581	-0.563578	0.02	0.031	1	2
Lsm11	0.387283	-0.563508	0.039	0.048	1	2
Sema4f	0.744438	-0.563306	0.011	0.013	1	2
Bmp7	0.5008	-0.563076	0.026	0.031	1	2
Zmym1	0.604476	-0.562876	0.038	0.043	1	2
Cryl1	0.558532	-0.561773	0.016	0.019	1	2
Marcksl1	0.262825	-0.561292	0.04	0.052	1	2
Prex2	0.159365	-0.560747	0.004	0.01	1	2
Tcta	0.323714	-0.560635	0.037	0.047	1	2
Pqlc3	0.0176268	-0.560392	0.063	0.094	1	2
Gtpbp6	0.266339	-0.560296	0.066	0.079	1	2
Ndrg3	0.0815509	-0.560186	0.107	0.133	1	2
Tmem116	0.578937	-0.55953	0.01	0.013	1	2
Hsd17b11	0.0164909	-0.559524	0.076	0.11	1	2
Map4k2	0.0210638	-0.559366	0.075	0.107	1	2
Tdp1	0.211669	-0.55802	0.04	0.053	1	2
Colq	0.196132	-0.557943	0.007	0.013	1	2
Slc30a6	0.112942	-0.557925	0.053	0.071	1	2
Zfp865	0.170057	-0.556055	0.055	0.071	1	2
Sacs	0.0203783	-0.555897	0.077	0.11	1	2
Evi2	0.676483	-0.554938	0.03	0.034	1	2
Cyb5d1	0.339521	-0.554903	0.016	0.022	1	2
Ncoa5	0.0162435	-0.5539	0.109	0.147	1	2
Rrp1b	0.0677028	-0.553391	0.057	0.079	1	2
Tmem185a	0.313508	-0.551629	0.034	0.043	1	2
Myg1	0.0527132	-0.550841	0.104	0.133	1	2
Zswim3	0.265871	-0.549575	0.028	0.038	1	2
Clstn1	0.21172	-0.548862	0.03	0.041	1	2
Tdrkh	0.266209	-0.548401	0.022	0.031	1	2
Tedc1	0.934794	-0.547932	0.013	0.013	1	2
Znfx1	0.250699	-0.54743	0.065	0.079	1	2
Eri2	0.423167	-0.547427	0.025	0.031	1	2
Lmf2	0.0322814	-0.547397	0.026	0.045	1	2
Hdc	0.251159	-0.547194	0.013	0.021	1	2
Gin1	0.0178375	-0.546615	0.07	0.103	1	2
Gpx8	0.334418	-0.546121	0.013	0.019	1	2
Plcl1	0.160214	-0.544884	0.02	0.031	1	2
Akr1e1	0.115339	-0.544782	0.044	0.061	1	2
Gbp9	0.0958122	-0.544207	0.076	0.098	1	2
Zfp426	0.0122726	-0.544164	0.087	0.124	1	2
Incenp	0.611047	-0.543919	0.05	0.056	1	2
Aldh9a1	0.0224273	-0.543887	0.093	0.127	1	2
Snapc2	0.337324	-0.543356	0.021	0.028	1	2
Pop1	0.0818057	-0.543188	0.018	0.031	1	2
Tmem191	0.0864786	-0.541903	0.038	0.056	1	2
Fbxo31	0.19195	-0.541061	0.051	0.066	1	2
Isoc2a	0.21091	-0.540648	0.031	0.043	1	2
Nr6a1	0.737996	-0.539648	0.046	0.049	1	2
Top2a	0.163177	-0.539527	0.056	0.072	1	2
Gm28539	0.199104	-0.539051	0.017	0.026	1	2
Il12rb1	0.0794554	-0.53814	0.026	0.041	1	2
Ctnnbip1	0.149304	-0.537826	0.017	0.027	1	2
Capn5	0.41843	-0.5377	0.007	0.01	1	2
Vps11	0.0756604	-0.537547	0.055	0.076	1	2
Cdc42bpb	0.423221	-0.536809	0.008	0.012	1	2
Ubac1	0.553066	-0.535709	0.058	0.065	1	2
Paqr3	0.45962	-0.535575	0.034	0.04	1	2
Borcs6	0.0396876	-0.534963	0.057	0.083	1	2
Aga	0.0941335	-0.534087	0.076	0.098	1	2
Mfge8	0.196739	-0.533002	0.05	0.065	1	2
Wdr47	0.584545	-0.532889	0.05	0.056	1	2
Ifit1bl1	0.569528	-0.532878	0.013	0.017	1	2
Vps37c	0.0409386	-0.532512	0.058	0.084	1	2
Inpp5f	0.266153	-0.531445	0.023	0.032	1	2
Ap4b1	0.19144	-0.531294	0.015	0.023	1	2
Isg20	0.0802396	-0.53117	0.027	0.043	1	2
Fntb	0.0797281	-0.531152	0.032	0.049	1	2
Kctd9	0.494076	-0.531098	0.047	0.054	1	2
Shq1	0.268154	-0.530742	0.035	0.045	1	2
Zfp955b	0.663609	-0.529635	0.054	0.058	1	2
Naip2	0.0546963	-0.528786	0.089	0.118	1	2
Fam219b	0.811215	-0.528456	0.036	0.038	1	2
Ppa2	0.0419298	-0.5267	0.112	0.145	1	2
Dusp18	0.878077	-0.526271	0.018	0.017	1	2
Zxdb	0.229055	-0.525858	0.051	0.065	1	2
Zfp763	0.213113	-0.525423	0.023	0.034	1	2
Mttp	0.168506	-0.524709	0.041	0.056	1	2
Cyhr1	0.0103613	-0.5244	0.047	0.078	1	2
Washc1	0.0645402	-0.523802	0.069	0.094	1	2
Cnn3	0.765578	-0.523693	0.009	0.01	1	2
Dclk2	0.737898	-0.523506	0.011	0.013	1	2
Tysnd1	0.139799	-0.522644	0.041	0.057	1	2
Rpp14	0.105787	-0.522168	0.082	0.103	1	2
Prorsd1	0.104681	-0.521426	0.149	0.176	1	2
Rce1	0.0579323	-0.52126	0.079	0.106	1	2
Mrpl16	0.0101708	-0.521032	0.126	0.169	1	2
Zfp276	0.157457	-0.520618	0.021	0.032	1	2
Qsox1	0.0921277	-0.520279	0.06	0.082	1	2
Dolk	0.424531	-0.520169	0.02	0.026	1	2
Ms4a4a	0.438008	-0.520112	0.011	0.016	1	2
Stxbp3	0.00332526	-0.519455	0.206	0.264	1	2
Phf11c	0.0574924	-0.519411	0.027	0.044	1	2
Klhl42	0.212039	-0.519391	0.026	0.036	1	2
Pigm	0.100606	-0.518057	0.067	0.088	1	2
Cct6b	0.428135	-0.517847	0.008	0.012	1	2
Carf	0.470222	-0.517664	0.03	0.036	1	2
H1f5	0.32963	-0.516818	0.029	0.038	1	2
Cyb5rl	0.273551	-0.515958	0.006	0.01	1	2
Tnfsf10	0.242192	-0.515406	0.135	0.151	1	2
Poglut3	0.325628	-0.51538	0.011	0.017	1	2
Tcf3	0.0270179	-0.5153	0.15	0.189	1	2
Slc29a1	0.441018	-0.514607	0.039	0.047	1	2
Zfp282	0.137891	-0.513249	0.044	0.06	1	2
Sac3d1	0.201538	-0.513225	0.048	0.062	1	2
Chst15	0.439839	-0.513105	0.011	0.016	1	2
Cdk2ap1	0.00336775	-0.5124	0.189	0.245	1	2
Bloc1s3	0.209746	-0.511996	0.036	0.048	1	2
Ipo13	0.750545	-0.511674	0.023	0.026	1	2
Timeless	0.422846	-0.511424	0.022	0.028	1	2
Ifih1	0.253096	-0.511115	0.044	0.056	1	2
Hilpda	0.0567563	-0.510757	0.132	0.166	1	2
Rasa4	0.70723	-0.510144	0.027	0.03	1	2
Brox	0.0244673	-0.507306	0.086	0.12	1	2
Xlr4c	0.342518	-0.507122	0.019	0.026	1	2
Anxa4	0.123152	-0.506722	0.021	0.034	1	2
Josd2	0.028894	-0.505509	0.143	0.18	1	2
Ndc80	0.266547	-0.504993	0.025	0.034	1	2
Rbl1	0.467921	-0.504785	0.084	0.093	1	2
Hk2	0.112355	-0.503837	0.055	0.074	1	2
Zfp784	0.581738	-0.502694	0.009	0.012	1	2
Pkig	0.0700907	-0.502444	0.103	0.131	1	2
Ccdc157	0.723844	-0.502314	0.012	0.014	1	2
St6galnac5	0.0962118	-0.502233	0.023	0.038	1	2
Flot2	0.0690047	-0.501401	0.072	0.096	1	2
2310022B05Rik	0.713344	-0.501365	0.012	0.01	1	2
Ndst2	0.338874	-0.501334	0.029	0.038	1	2
Mrpl19	0.04036	-0.501292	0.098	0.129	1	2
Rrp12	0.493104	-0.50103	0.028	0.034	1	2
Eef1akmt4	0.121025	-0.500941	0.011	0.021	1	2
Il4i1	0.0999848	-0.500927	0.015	0.026	1	2
Sh3pxd2a	0.40184	-0.500531	0.032	0.04	1	2
Nebl	0.0785324	-0.500138	0.169	0.202	1	2
Cntrob	0.3914	-0.499247	0.049	0.058	1	2
Armc3	0.261827	-0.498712	0.038	0.049	1	2
Msrb3	0.766961	-0.496857	0.009	0.01	1	2
Nfxl1	0.335487	-0.496498	0.026	0.034	1	2
Blzf1	0.833422	-0.495742	0.054	0.056	1	2
Samhd1	0.0116886	-0.495258	0.391	0.445	1	2
Rnft1	0.000778804	-0.494952	0.109	0.167	1	2
Avpi1	0.18449	-0.494609	0.013	0.022	1	2
Zfp599	0.319702	-0.494291	0.01	0.016	1	2
Ccar2	0.508514	-0.49411	0.063	0.07	1	2
Il3ra	0.0218949	-0.493933	0.041	0.067	1	2
Inppl1	0.180635	-0.493505	0.012	0.021	1	2
Zfp408	0.219737	-0.493008	0.031	0.043	1	2
Tet1	0.138653	-0.492961	0.015	0.025	1	2
H2ac25	0.0198973	-0.492805	0.088	0.124	1	2
Qtrt2	0.719703	-0.492194	0.027	0.03	1	2
Sugp2	0.229125	-0.49177	0.065	0.08	1	2
Cog2	0.0317727	-0.491659	0.065	0.093	1	2
Dgkh	0.0467137	-0.491164	0.102	0.133	1	2
Nsmce3	0.0670608	-0.49103	0.131	0.162	1	2
Dipk1b	0.421326	-0.490724	0.022	0.028	1	2
Nek8	0.0714468	-0.490174	0.022	0.038	1	2
Hdac9	0.440927	-0.490049	0.059	0.069	1	2
Unk	0.0642713	-0.489376	0.067	0.092	1	2
Mical3	0.426377	-0.488856	0.008	0.012	1	2
Jade3	0.14229	-0.488772	0.036	0.05	1	2
Arnt2	0.190553	-0.488447	0.015	0.023	1	2
Gm12185	0.12945	-0.488324	0.081	0.101	1	2
Mapkbp1	0.340904	-0.488319	0.025	0.032	1	2
Lonrf3	0.125381	-0.488064	0.012	0.022	1	2
Zfp24	0.153173	-0.48736	0.089	0.11	1	2
Fmnl2	0.440451	-0.486484	0.011	0.016	1	2
Gas2l3	0.582739	-0.486466	0.01	0.013	1	2
Zfp606	0.0628517	-0.485917	0.031	0.049	1	2
Grwd1	0.275015	-0.485822	0.03	0.04	1	2
Iffo2	0.216698	-0.48569	0.089	0.106	1	2
Fhl3	0.273551	-0.485327	0.006	0.01	1	2
Vmac	0.596669	-0.485321	0.027	0.031	1	2
Mtif3	0.046763	-0.485153	0.069	0.097	1	2
S1pr4	0.00504917	-0.485152	0.228	0.287	1	2
Tsc22d1	0.0215859	-0.484958	0.126	0.167	1	2
Parp16	0.266763	-0.484557	0.03	0.04	1	2
Orai3	0.0369683	-0.482561	0.093	0.125	1	2
Atxn1l	0.241257	-0.482126	0.047	0.06	1	2
Gvin1	0.0115325	-0.481551	0.142	0.186	1	2
Nfe2l3	0.0578324	-0.480622	0.017	0.031	1	2
Cops7b	0.632156	-0.480416	0.038	0.043	1	2
Amdhd1	0.42708	-0.479972	0.008	0.012	1	2
Traf4	0.114626	-0.47984	0.046	0.063	1	2
Hoxb3	0.965881	-0.479466	0.015	0.014	1	2
Mdc1	0.593001	-0.479242	0.079	0.085	1	2
Emc9	0.257211	-0.478703	0.04	0.052	1	2
Tmem176a	0.0182324	-0.478357	0.096	0.132	1	2
Myd88	0.0531977	-0.478296	0.082	0.109	1	2
Spout1	0.058043	-0.478193	0.04	0.061	1	2
Ctnna3	0.425323	-0.477778	0.008	0.012	1	2
Zcchc2	0.0719532	-0.477769	0.185	0.216	1	2
Nae1	0.0110163	-0.476678	0.164	0.212	1	2
Pacsin1	0.345572	-0.476572	0.022	0.03	1	2
Pcnx4	0.400142	-0.475968	0.049	0.058	1	2
Rpusd1	0.725005	-0.475507	0.012	0.014	1	2
Fam98c	0.0617814	-0.475252	0.075	0.101	1	2
Fkbp7	0.272229	-0.475238	0.023	0.032	1	2
Scn5a	0.0980389	-0.475158	0.004	0.012	1	2
Btbd3	0.133931	-0.474923	0.013	0.023	1	2
Ccdc71	0.42355	-0.473712	0.041	0.049	1	2
Cul9	0.293319	-0.473666	0.047	0.058	1	2
D6Wsu163e	0.218209	-0.473492	0.031	0.043	1	2
Polq	0.113387	-0.473395	0.01	0.019	1	2
Sf3a3	0.0130439	-0.473208	0.167	0.212	1	2
Trmt10b	0.0586938	-0.472964	0.059	0.083	1	2
Ndufb8	1.32333e-05	-0.472708	0.361	0.462	0.219012	2
Gtf3c5	0.267388	-0.472258	0.034	0.044	1	2
Mef2b	0.170641	-0.471774	0.03	0.043	1	2
Pradc1	0.0927032	-0.471657	0.049	0.069	1	2
Mul1	0.0615475	-0.471637	0.046	0.067	1	2
Sh3d19	0.338871	-0.471605	0.019	0.026	1	2
Pex19	0.0436244	-0.4711	0.069	0.097	1	2
Alkbh6	0.0998255	-0.471078	0.078	0.101	1	2
Tm9sf1	0.435186	-0.470728	0.038	0.045	1	2
Socs4	0.021601	-0.470673	0.199	0.242	1	2
Tmem38b	0.625292	-0.470244	0.045	0.049	1	2
Tab3	0.0334285	-0.470017	0.098	0.131	1	2
Rmdn2	0.329742	-0.46999	0.048	0.058	1	2
Synj2	0.341423	-0.469949	0.028	0.036	1	2
Ptges2	0.410293	-0.469441	0.027	0.034	1	2
Il2	0.940717	-0.469278	0.028	0.028	1	2
Dhx34	0.0548369	-0.469011	0.038	0.058	1	2
Igfbp4	0.813011	-0.468888	0.018	0.019	1	2
Cul2	0.0576959	-0.468873	0.119	0.149	1	2
Setmar	0.765117	-0.468786	0.009	0.01	1	2
Trim34a	0.256359	-0.46845	0.129	0.146	1	2
Dhx30	0.0025938	-0.467872	0.106	0.158	1	2
Cry2	0.42558	-0.467691	0.044	0.052	1	2
Acot11	0.720896	-0.46765	0.039	0.043	1	2
Cpox	0.096835	-0.46761	0.053	0.072	1	2
Amy1	0.319189	-0.467303	0.01	0.016	1	2
Kctd3	0.577259	-0.466532	0.03	0.035	1	2
Timm22	0.00476539	-0.465322	0.101	0.146	1	2
Csrnp2	0.953805	-0.465059	0.021	0.021	1	2
Cep104	0.0625307	-0.464712	0.029	0.047	1	2
Etfb	0.000776806	-0.464701	0.249	0.322	1	2
Czib	0.0692387	-0.464677	0.084	0.11	1	2
Sestd1	0.207659	-0.464129	0.027	0.038	1	2
Rftn2	0.194879	-0.463509	0.016	0.025	1	2
Zmynd19	0.632628	-0.463383	0.035	0.039	1	2
Ercc6l	0.303483	-0.463018	0.008	0.013	1	2
Isoc2b	0.0623848	-0.461974	0.045	0.066	1	2
Ptch1	0.227104	-0.461777	0.065	0.08	1	2
Med25	0.164418	-0.461488	0.056	0.072	1	2
Hinfp	0.42939	-0.461472	0.045	0.053	1	2
Cenpv	0.217038	-0.460988	0.035	0.047	1	2
Tnfsf4	0.231398	-0.460515	0.01	0.017	1	2
Unc93b1	0.0213521	-0.460443	0.085	0.119	1	2
Llgl1	0.0541619	-0.460185	0.039	0.06	1	2
Noc3l	0.042482	-0.459792	0.057	0.083	1	2
Tmem242	0.269199	-0.459537	0.073	0.087	1	2
Dohh	0.0370591	-0.459524	0.087	0.118	1	2
Dtx3	0.0582796	-0.4592	0.089	0.116	1	2
Zfp65	0.215913	-0.459152	0.034	0.045	1	2
Cbr4	0.124117	-0.459014	0.022	0.035	1	2
Nsg2	0.423	-0.458771	0.076	0.087	1	2
Ggact	0.166866	-0.458205	0.097	0.118	1	2
Tmem11	0.0287349	-0.45808	0.161	0.201	1	2
Tti2	0.775036	-0.457712	0.041	0.044	1	2
Rusc1	0.169105	-0.457662	0.059	0.076	1	2
Xpot	0.0228839	-0.457396	0.06	0.089	1	2
Shld2	0.415231	-0.457245	0.073	0.083	1	2
Zfp14	0.867207	-0.45686	0.015	0.016	1	2
Mier2	0.675384	-0.456705	0.018	0.021	1	2
Plekhg2	0.417967	-0.455906	0.045	0.053	1	2
Trim35	0.0126284	-0.45547	0.088	0.127	1	2
6430548M08Rik	0.302933	-0.454989	0.008	0.013	1	2
Usp11	0.0889742	-0.453943	0.056	0.076	1	2
Adamts10	0.0244009	-0.453682	0.163	0.204	1	2
Tomm40l	0.350669	-0.453506	0.023	0.031	1	2
Mif4gd	0.0112188	-0.453141	0.102	0.141	1	2
Slc12a2	0.73668	-0.45209	0.035	0.038	1	2
Tradd	0.0999906	-0.451981	0.153	0.18	1	2
Fam174b	0.788006	-0.451947	0.02	0.022	1	2
Nudt13	0.0512601	-0.451507	0.063	0.088	1	2
Zfp579	0.267371	-0.45145	0.035	0.045	1	2
Dhx58	0.342107	-0.451385	0.023	0.031	1	2
Txndc15	0.0104055	-0.451232	0.129	0.175	1	2
Pbx4	0.689233	-0.451116	0.017	0.019	1	2
Arhgef7	0.033013	-0.449276	0.107	0.141	1	2
Lratd2	0.339033	-0.44874	0.027	0.035	1	2
Gfus	0.0601521	-0.448017	0.094	0.123	1	2
Garnl3	0.550271	-0.447916	0.017	0.021	1	2
Gm20498	0.206061	-0.447647	0.018	0.027	1	2
Nanos1	0.571676	-0.447617	0.012	0.016	1	2
Rab6b	0.0623963	-0.447589	0.072	0.097	1	2
Rnf5	0.0521684	-0.446385	0.088	0.116	1	2
Nipal1	0.430046	-0.446056	0.02	0.026	1	2
Farsb	0.18564	-0.446037	0.104	0.124	1	2
H2bc21	0.580811	-0.445381	0.011	0.014	1	2
Meaf6	0.012631	-0.444754	0.105	0.146	1	2
Jag2	0.271211	-0.444581	0.006	0.01	1	2
Otub1	0.0125556	-0.444283	0.182	0.229	1	2
Zbtb8a	0.340071	-0.443515	0.027	0.035	1	2
Drg2	0.25749	-0.443485	0.06	0.074	1	2
Cd101	0.628382	-0.443327	0.022	0.026	1	2
2010315B03Rik	0.0565332	-0.443205	0.072	0.098	1	2
Aldh4a1	0.43336	-0.44287	0.021	0.027	1	2
Clk3	0.0092046	-0.44255	0.119	0.164	1	2
Mms19	0.0705685	-0.441153	0.125	0.155	1	2
Chtf8	0.343975	-0.441092	0.02	0.027	1	2
Zkscan14	0.0475447	-0.440877	0.1	0.131	1	2
Rab4a	0.156961	-0.440514	0.097	0.118	1	2
Irgm2	0.033599	-0.44043	0.074	0.103	1	2
Nosip	0.0310449	-0.440273	0.17	0.211	1	2
Adnp	0.18532	-0.440172	0.064	0.08	1	2
Tmem154	0.112125	-0.440019	0.059	0.079	1	2
Trim8	0.0399162	-0.43989	0.079	0.109	1	2
Serinc5	0.556156	-0.439611	0.034	0.039	1	2
Ess2	0.814569	-0.439192	0.053	0.054	1	2
Arl16	0.262517	-0.43918	0.036	0.047	1	2
Scnm1	0.157695	-0.439136	0.065	0.083	1	2
Samd13	0.341002	-0.438783	0.013	0.019	1	2
Gpsm1	0.165179	-0.438638	0.058	0.075	1	2
Lst1	0.221155	-0.437539	0.031	0.043	1	2
Mars2	0.48594	-0.436793	0.032	0.039	1	2
Hspbap1	0.571731	-0.436782	0.045	0.05	1	2
Cyp39a1	0.710252	-0.436559	0.015	0.017	1	2
Vipr1	0.155523	-0.436514	0.021	0.032	1	2
B3glct	0.333995	-0.435834	0.032	0.041	1	2
Asb1	0.895244	-0.435435	0.03	0.031	1	2
Zfp780b	0.320299	-0.435	0.039	0.049	1	2
Tsen2	0.345475	-0.434864	0.017	0.023	1	2
Cdnf	0.0521899	-0.4345	0.021	0.038	1	2
Scn1b	0.51554	-0.434095	0.023	0.028	1	2
Cpq	0.0436804	-0.433586	0.171	0.208	1	2
Wdsub1	0.692925	-0.432498	0.016	0.018	1	2
Bbof1	0.144279	-0.432435	0.008	0.016	1	2
Nme4	0.924619	-0.432237	0.011	0.012	1	2
Tbpl1	0.00595265	-0.431548	0.141	0.191	1	2
Mindy1	0.319362	-0.431494	0.036	0.045	1	2
Syngr2	0.0799167	-0.431421	0.139	0.168	1	2
Rrp9	0.0987304	-0.431412	0.098	0.123	1	2
Sdhd	0.00384567	-0.431295	0.267	0.325	1	2
Slc66a2	0.881286	-0.431212	0.023	0.025	1	2
H2-T23	5.51261e-09	-0.431126	0.636	0.741	9.12338e-05	2
Mettl18	0.318132	-0.431065	0.039	0.049	1	2
Zfp691	0.417317	-0.430963	0.007	0.01	1	2
Acvr1b	0.203634	-0.43073	0.018	0.027	1	2
Lin9	0.173794	-0.430319	0.04	0.054	1	2
Sco2	0.112424	-0.429975	0.03	0.045	1	2
Sh3bp4	0.43804	-0.429893	0.017	0.022	1	2
Arfgap3	0.644957	-0.429763	0.035	0.039	1	2
Krtcap3	0.140839	-0.429618	0.03	0.044	1	2
Pank1	0.747119	-0.42868	0.044	0.047	1	2
Zscan20	0.712018	-0.42866	0.013	0.016	1	2
Pomgnt1	0.331802	-0.428657	0.032	0.041	1	2
Stat1	0.00564119	-0.428425	0.267	0.323	1	2
Uck2	0.125263	-0.428109	0.132	0.158	1	2
Nrp1	0.200523	-0.4279	0.018	0.027	1	2
Rtf2	0.00241846	-0.426882	0.251	0.321	1	2
Gtpbp3	0.116971	-0.425341	0.036	0.052	1	2
Cenpe	0.88337	-0.425206	0.013	0.014	1	2
Mib2	0.419382	-0.425183	0.027	0.034	1	2
Tmem80	0.317122	-0.424055	0.07	0.083	1	2
Trim36	0.0391239	-0.424052	0.105	0.14	1	2
Gfpt1	0.0249769	-0.423493	0.131	0.169	1	2
Htra2	0.212225	-0.42345	0.05	0.065	1	2
Cdkn2c	0.198591	-0.423378	0.055	0.07	1	2
Rab26	0.435722	-0.423122	0.009	0.013	1	2
Prickle1	0.501059	-0.422649	0.027	0.032	1	2
H2ac22	0.709808	-0.421589	0.013	0.016	1	2
Rap2c	0.00434066	-0.421492	0.21	0.268	1	2
Mrpl13	0.00819655	-0.421487	0.166	0.213	1	2
Stimate	0.269797	-0.421475	0.059	0.072	1	2
Fxr2	0.131515	-0.421278	0.081	0.101	1	2
Zfp949	0.144297	-0.421206	0.04	0.056	1	2
Dars	0.062116	-0.421176	0.164	0.195	1	2
Haus4	0.0917318	-0.421102	0.1	0.125	1	2
Sepsecs	0.252916	-0.420831	0.084	0.1	1	2
Man1b1	0.0828981	-0.420389	0.055	0.076	1	2
Prmt1	0.000697053	-0.419981	0.291	0.365	1	2
Nupr1l	0.442484	-0.419946	0.015	0.019	1	2
Arl10	0.0594215	-0.419435	0.045	0.066	1	2
Lcmt2	0.308439	-0.419187	0.038	0.048	1	2
Tpcn2	0.857126	-0.418969	0.034	0.035	1	2
9530068E07Rik	0.0249084	-0.418893	0.147	0.186	1	2
Bhlhe41	0.330624	-0.418544	0.011	0.017	1	2
Mapk12	0.581597	-0.418072	0.01	0.013	1	2
Rnf168	0.0622293	-0.417233	0.076	0.102	1	2
Zfp455	0.29106	-0.417178	0.007	0.012	1	2
Cish	0.610727	-0.417001	0.064	0.07	1	2
Tbc1d7	0.433745	-0.416703	0.02	0.026	1	2
Cxcl10	0.600705	-0.415565	0.114	0.106	1	2
Mettl17	0.427455	-0.415488	0.051	0.061	1	2
Nup210l	0.17885	-0.415022	0.036	0.049	1	2
Map4k5	0.228135	-0.414749	0.081	0.097	1	2
Gm14305	0.391302	-0.413786	0.036	0.044	1	2
Parp2	0.0842507	-0.413603	0.106	0.133	1	2
Tmem121	0.427783	-0.413487	0.008	0.012	1	2
Gpr19	0.371674	-0.41284	0.055	0.065	1	2
Rabepk	0.0270689	-0.412699	0.116	0.153	1	2
Mcm4	0.0780641	-0.412637	0.129	0.157	1	2
Ncln	0.349929	-0.412595	0.062	0.072	1	2
Atg16l1	0.0240007	-0.4122	0.145	0.185	1	2
Icosl	0.497707	-0.4113	0.029	0.035	1	2
Fbxw4	0.0795204	-0.410456	0.153	0.182	1	2
Taco1	0.512132	-0.410185	0.067	0.075	1	2
Trib2	0.1222	-0.410142	0.043	0.06	1	2
Sap18b	0.217623	-0.408866	0.031	0.043	1	2
Supt7l	0.267277	-0.408733	0.032	0.043	1	2
Il6ra	0.548621	-0.408478	0.018	0.022	1	2
Ap1s3	0.0713444	-0.40792	0.098	0.125	1	2
Tha1	0.837788	-0.407726	0.063	0.06	1	2
Uprt	0.271512	-0.407594	0.027	0.036	1	2
Synpo	0.43735	-0.407579	0.01	0.014	1	2
Isg15	0.189641	-0.40713	0.121	0.144	1	2
Pdcl	0.221775	-0.4069	0.082	0.098	1	2
Uxt	0.101627	-0.406683	0.088	0.113	1	2
Ptcd1	0.987189	-0.406662	0.03	0.03	1	2
Nudt6	0.350617	-0.406269	0.047	0.057	1	2
Zfp738	0.173173	-0.40597	0.062	0.079	1	2
Hemgn	0.962659	-0.405115	0.026	0.026	1	2
Pde10a	0.0208911	-0.405042	0.007	0.019	1	2
Ndufa9	0.0350345	-0.404972	0.196	0.235	1	2
Pitpnm2	0.561784	-0.404854	0.045	0.05	1	2
Ttll1	0.671936	-0.404664	0.018	0.021	1	2
Rbm12b2	0.139249	-0.404341	0.041	0.057	1	2
Ell	0.0966003	-0.404305	0.069	0.092	1	2
Fes	0.108526	-0.404188	0.074	0.096	1	2
Slc15a2	0.00841602	-0.403622	0.058	0.093	1	2
Mks1	0.557624	-0.403435	0.016	0.019	1	2
Exoc7	0.0130571	-0.403381	0.111	0.151	1	2
Cercam	0.7511	-0.40323	0.01	0.012	1	2
Marveld1	0.461192	-0.40321	0.035	0.041	1	2
Polr2d	0.0901543	-0.402974	0.114	0.141	1	2
Tmco3	0.766012	-0.402853	0.083	0.085	1	2
Fbxl8	0.0525218	-0.402704	0.078	0.106	1	2
H4c11	0.582739	-0.402372	0.01	0.013	1	2
Srm	0.136842	-0.40215	0.054	0.071	1	2
Etnk2	0.940953	-0.4019	0.013	0.013	1	2
Vcpkmt	0.0900744	-0.401833	0.069	0.092	1	2
Manba	0.0099836	-0.401763	0.111	0.154	1	2
Lin54	0.111774	-0.40151	0.117	0.142	1	2
Pdlim2	0.0552316	-0.401341	0.144	0.177	1	2
Dpcd	0.0139893	-0.401085	0.145	0.191	1	2
Rnpepl1	0.0302328	-0.400853	0.097	0.132	1	2
Akt2	0.0481331	-0.400749	0.149	0.184	1	2
Jade1	0.299243	-0.400715	0.087	0.101	1	2
Ppcs	0.036008	-0.400573	0.081	0.111	1	2
Dhrs1	0.304301	-0.400399	0.075	0.088	1	2
Pex5	0.315881	-0.400347	0.084	0.098	1	2
Camsap2	0.243487	-0.400089	0.078	0.094	1	2
Gdpd3	0.765578	-0.398542	0.009	0.01	1	2
Dstn	0.339964	-0.398391	0.11	0.123	1	2
Rimoc1	0.209226	-0.397641	0.111	0.129	1	2
Caprin2	0.525176	-0.397561	0.017	0.013	1	2
Cd200r1	0.403098	-0.397537	0.034	0.041	1	2
Prkcz	0.207735	-0.397527	0.054	0.069	1	2
Pank3	0.076279	-0.39742	0.072	0.096	1	2
Seh1l	0.0742061	-0.397239	0.125	0.154	1	2
Mthfs	0.0472446	-0.396412	0.168	0.206	1	2
Ogfr	0.138993	-0.396255	0.129	0.154	1	2
Zfp105	0.715707	-0.396011	0.013	0.016	1	2
Vrk2	0.00127509	-0.395996	0.244	0.313	1	2
Slc16a10	0.00538973	-0.395667	0.087	0.129	1	2
Pgghg	0.443344	-0.395573	0.018	0.023	1	2
Sox4	0.198102	-0.39527	0.051	0.066	1	2
Cluh	0.551787	-0.394989	0.036	0.041	1	2
Cfl2	0.186078	-0.394468	0.139	0.162	1	2
Myl12b	7.17827e-06	-0.394359	0.529	0.607	0.1188	2
Sdhaf3	0.139906	-0.393913	0.055	0.072	1	2
Arl11	0.742801	-0.393897	0.011	0.013	1	2
Rhbdd3	0.435915	-0.393731	0.01	0.014	1	2
Nxpe3	0.378715	-0.393581	0.055	0.065	1	2
Scaf1	0.175065	-0.393423	0.12	0.141	1	2
Tmprss6	0.356664	-0.393326	0.062	0.072	1	2
Tnfsf9	0.544963	-0.393202	0.018	0.022	1	2
Stk3	0.0422283	-0.39314	0.129	0.163	1	2
Ift27	0.046006	-0.392058	0.091	0.122	1	2
Tbc1d12	0.203512	-0.391702	0.072	0.088	1	2
Ninj2	0.562477	-0.391563	0.016	0.019	1	2
Fdx1	0.0158483	-0.391228	0.126	0.169	1	2
Ddx49	0.0893954	-0.391128	0.077	0.101	1	2
E2f4	0.0484745	-0.39109	0.122	0.154	1	2
Ddb2	0.105763	-0.390914	0.089	0.113	1	2
Noa1	0.0656135	-0.390829	0.05	0.072	1	2
Nab2	0.172619	-0.390803	0.049	0.065	1	2
Homez	0.780428	-0.39044	0.02	0.022	1	2
Men1	0.419942	-0.390117	0.028	0.035	1	2
Tmem79	0.32837	-0.389421	0.011	0.017	1	2
Trib1	0.178517	-0.389278	0.012	0.021	1	2
Il27ra	0.0189172	-0.388978	0.178	0.225	1	2
Eif3l	0.0192879	-0.388574	0.178	0.223	1	2
Ksr2	0.230393	-0.388246	0.01	0.017	1	2
Cmtm4	0.754562	-0.388103	0.01	0.012	1	2
Crat	0.994994	-0.388055	0.025	0.025	1	2
Armh3	0.170532	-0.387461	0.107	0.128	1	2
Tmem138	0.342846	-0.387368	0.023	0.031	1	2
Zfp362	0.212216	-0.387237	0.073	0.089	1	2
9930012K11Rik	0.451666	-0.3864	0.015	0.01	1	2
Rassf2	0.0643544	-0.386367	0.135	0.166	1	2
Ap5z1	0.32321	-0.385843	0.038	0.048	1	2
Bcat2	0.642364	-0.385635	0.066	0.071	1	2
Mon1a	0.260389	-0.385414	0.067	0.082	1	2
Tcirg1	0.45251	-0.385319	0.096	0.107	1	2
Arrdc2	0.558492	-0.385227	0.032	0.038	1	2
Pofut1	0.391326	-0.385184	0.057	0.067	1	2
Bend4	0.0758653	-0.385105	0.068	0.092	1	2
Tmem87a	0.142288	-0.384858	0.223	0.248	1	2
Nkrf	0.21212	-0.384831	0.019	0.028	1	2
Rilpl1	0.584958	-0.384731	0.009	0.012	1	2
Zfp458	0.128692	-0.384143	0.012	0.022	1	2
Mrpl54	0.0192552	-0.38362	0.23	0.272	1	2
Mvb12a	0.0101122	-0.383492	0.261	0.314	1	2
Poll	0.115551	-0.383479	0.018	0.03	1	2
Ift57	0.409829	-0.383407	0.045	0.053	1	2
Psd3	0.269187	-0.383373	0.017	0.025	1	2
Nop9	0.0690441	-0.382904	0.07	0.096	1	2
Kif13a	0.527856	-0.38224	0.021	0.026	1	2
Cox11	0.162555	-0.382107	0.091	0.111	1	2
Enoph1	0.475133	-0.381994	0.032	0.039	1	2
Mettl25	0.748391	-0.381573	0.072	0.075	1	2
Rundc3b	0.0730068	-0.381214	0.238	0.274	1	2
Kctd11	0.841096	-0.380991	0.035	0.036	1	2
Fam76a	0.0713999	-0.380686	0.121	0.151	1	2
Decr2	0.161899	-0.380212	0.02	0.031	1	2
Mrps28	0.0274295	-0.379879	0.158	0.198	1	2
Phgdh	0.00950145	-0.379569	0.119	0.163	1	2
Ctif	0.445759	-0.379194	0.015	0.019	1	2
Smu1	0.00191779	-0.37897	0.216	0.286	1	2
Slf1	0.0943266	-0.378811	0.135	0.163	1	2
Pomc	0.765803	-0.378381	0.044	0.04	1	2
Pdzd2	0.348799	-0.378295	0.028	0.036	1	2
Parp11	0.488393	-0.377969	0.1	0.11	1	2
Ndrg1	0.314794	-0.37734	0.036	0.045	1	2
Maea	0.0238588	-0.377299	0.186	0.23	1	2
Tmem107	0.86111	-0.376864	0.015	0.016	1	2
Dennd6b	0.578642	-0.376657	0.011	0.014	1	2
Cep128	0.191459	-0.376657	0.1	0.119	1	2
Entr1	0.0727849	-0.376321	0.114	0.144	1	2
Cptp	0.692925	-0.376318	0.016	0.018	1	2
Tab1	0.258996	-0.376314	0.05	0.063	1	2
Stmn1	0.0293953	-0.376258	0.159	0.199	1	2
Ppp2r5b	0.345908	-0.375764	0.017	0.023	1	2
Cs	0.166842	-0.375256	0.168	0.19	1	2
Galt	0.224827	-0.374793	0.06	0.075	1	2
Arhgef2	0.0132007	-0.374749	0.273	0.327	1	2
Abtb1	0.32464	-0.374471	0.058	0.07	1	2
Cep152	0.408793	-0.374275	0.056	0.066	1	2
Cstf1	0.217391	-0.373132	0.032	0.044	1	2
Tgtp1	0.768346	-0.373114	0.009	0.01	1	2
H2bc27	0.342071	-0.372999	0.053	0.063	1	2
Rexo5	0.49534	-0.372931	0.064	0.071	1	2
Gm45902	0.214461	-0.372604	0.021	0.031	1	2
Ap5m1	0.0859864	-0.371928	0.11	0.137	1	2
Pmpcb	0.0463183	-0.371506	0.121	0.154	1	2
Unkl	0.367373	-0.371393	0.105	0.118	1	2
Eps8l1	0.279878	-0.371192	0.034	0.044	1	2
Tango2	0.235327	-0.371148	0.106	0.124	1	2
Stau2	0.158746	-0.370824	0.004	0.01	1	2
Gpx7	0.289921	-0.370813	0.007	0.012	1	2
Rac3	0.115394	-0.370713	0.048	0.066	1	2
Elp2	0.548298	-0.370587	0.095	0.102	1	2
Ccr7	0.723661	-0.370334	0.059	0.063	1	2
Nit2	0.24264	-0.370309	0.053	0.066	1	2
1600014C10Rik	0.35501	-0.368905	0.074	0.085	1	2
Cdk16	0.862042	-0.368904	0.063	0.06	1	2
Twf2	0.0025204	-0.368879	0.275	0.345	1	2
Rfc5	0.243044	-0.368868	0.053	0.066	1	2
Bag2	0.883764	-0.36878	0.018	0.017	1	2
Lats2	0.102512	-0.368744	0.088	0.113	1	2
Sap30bp	0.114006	-0.368619	0.163	0.191	1	2
Cass4	0.587326	-0.368364	0.008	0.01	1	2
Cacfd1	0.255064	-0.368165	0.064	0.078	1	2
Tmem126b	0.127336	-0.367923	0.06	0.08	1	2
Brpf1	0.0841161	-0.367299	0.077	0.102	1	2
Slc27a4	0.345062	-0.367281	0.016	0.022	1	2
Rmi1	0.363972	-0.367117	0.076	0.088	1	2
Nat2	0.386702	-0.366618	0.037	0.045	1	2
Tpst1	0.320988	-0.366537	0.01	0.016	1	2
Tuba1c	0.000855076	-0.366472	0.295	0.38	1	2
Tonsl	0.628989	-0.366405	0.023	0.027	1	2
Lias	0.050106	-0.366298	0.105	0.137	1	2
Fyco1	0.539908	-0.36597	0.124	0.132	1	2
Lamc1	0.345208	-0.365737	0.018	0.025	1	2
Them4	0.848139	-0.365279	0.025	0.026	1	2
Ppp1r16a	0.93509	-0.365277	0.028	0.027	1	2
Spaca9	0.131144	-0.365046	0.072	0.092	1	2
Mpv17l2	0.129312	-0.364357	0.088	0.11	1	2
Napepld	0.332785	-0.364149	0.013	0.019	1	2
Suclg1	0.002682	-0.364032	0.343	0.415	1	2
Dhx16	0.386132	-0.363807	0.109	0.122	1	2
Zbtb49	0.219998	-0.363658	0.029	0.04	1	2
Nomo1	0.367859	-0.363609	0.057	0.067	1	2
Abcb10	0.114822	-0.363537	0.036	0.052	1	2
Umps	0.108184	-0.363393	0.079	0.102	1	2
Grhl1	0.436058	-0.362631	0.009	0.013	1	2
Igtp	0.252851	-0.362524	0.066	0.08	1	2
Tmed1	0.585777	-0.36174	0.029	0.034	1	2
Alox5ap	0.562203	-0.361718	0.015	0.018	1	2
Zfp119a	0.271738	-0.361638	0.02	0.028	1	2
Fbxo4	0.275414	-0.361251	0.14	0.158	1	2
L1cam	0.91959	-0.361159	0.029	0.03	1	2
Vhl	0.611356	-0.360751	0.094	0.101	1	2
Zfp707	0.73898	-0.360499	0.056	0.06	1	2
Brpf3	0.53855	-0.360152	0.051	0.058	1	2
Oat	0.299752	-0.360136	0.102	0.118	1	2
Slc44a1	0.319967	-0.360056	0.064	0.076	1	2
Txnrd1	0.00755155	-0.359591	0.284	0.336	1	2
Whrn	0.346991	-0.359584	0.017	0.023	1	2
Ercc3	0.245137	-0.359191	0.072	0.087	1	2
Iffo1	0.638875	-0.359162	0.077	0.083	1	2
Ncaph	0.42884	-0.358856	0.008	0.012	1	2
Rigi	0.200272	-0.358788	0.211	0.234	1	2
Tep1	0.269951	-0.35872	0.041	0.053	1	2
Terf2ip	0.208106	-0.358646	0.076	0.093	1	2
Setd1b	0.32916	-0.358002	0.135	0.151	1	2
Hexb	0.0398737	-0.357858	0.405	0.437	1	2
Necap1	0.216327	-0.357826	0.095	0.113	1	2
Rab23	0.440229	-0.357501	0.01	0.014	1	2
Tmem203	0.27877	-0.357367	0.122	0.138	1	2
Smim13	0.25259	-0.357167	0.046	0.058	1	2
Ptcd2	0.0886893	-0.357044	0.11	0.137	1	2
Pja1	0.0544643	-0.356869	0.086	0.114	1	2
Pml	0.0669549	-0.356826	0.087	0.115	1	2
Prdm11	0.589746	-0.356528	0.063	0.069	1	2
Tsc2	0.697995	-0.356059	0.041	0.045	1	2
Mrpl2	0.142339	-0.355997	0.114	0.138	1	2
Samd1	0.340634	-0.355837	0.051	0.062	1	2
Tifa	0.57792	-0.355766	0.011	0.014	1	2
Armcx4	0.423243	-0.355606	0.023	0.03	1	2
E4f1	0.0378151	-0.355603	0.077	0.107	1	2
Cdk5rap1	0.0125199	-0.355593	0.124	0.168	1	2
Ifi209	0.0805978	-0.355324	0.31	0.351	1	2
Zbtb16	0.148875	-0.355195	0.084	0.106	1	2
Zbed4	0.449822	-0.355169	0.067	0.076	1	2
Gm10033	0.191164	-0.354955	0.079	0.097	1	2
Abr	0.0273446	-0.354867	0.215	0.261	1	2
Zfp281	0.328252	-0.354848	0.055	0.066	1	2
Slc12a6	0.155748	-0.354801	0.14	0.16	1	2
Nudt16	0.0695755	-0.354434	0.073	0.098	1	2
Ccdc112	0.95091	-0.353818	0.01	0.01	1	2
Acadsb	0.314147	-0.353548	0.058	0.07	1	2
Jdp2	0.0856682	-0.353436	0.13	0.157	1	2
Gpatch1	0.0991698	-0.353353	0.041	0.06	1	2
Tiprl	0.0260602	-0.353276	0.442	0.488	1	2
Gm44505	0.419173	-0.353258	0.007	0.01	1	2
Tor3a	0.20026	-0.353244	0.082	0.1	1	2
Ola1	0.0061714	-0.352897	0.254	0.313	1	2
Pmepa1	0.725993	-0.352754	0.093	0.097	1	2
Bri3	0.000823123	-0.352691	0.386	0.462	1	2
Ttc33	0.143795	-0.352662	0.081	0.101	1	2
Xlr4a	0.0632802	-0.352648	0.05	0.072	1	2
Klrb1	0.384534	-0.352647	0.053	0.062	1	2
Cdip1	0.0559185	-0.35196	0.114	0.146	1	2
Srp68	0.348955	-0.351621	0.128	0.141	1	2
Adprs	0.289823	-0.351533	0.093	0.109	1	2
Peli2	0.742175	-0.351317	0.044	0.047	1	2
Tdrd7	0.692155	-0.351243	0.07	0.075	1	2
Aacs	0.411135	-0.351203	0.032	0.04	1	2
Rev1	0.204466	-0.351063	0.059	0.075	1	2
Bhlhb9	0.511955	-0.350735	0.026	0.031	1	2
Zfyve1	0.428861	-0.350695	0.067	0.076	1	2
Sntb2	0.325781	-0.350629	0.198	0.217	1	2
Dvl1	0.383954	-0.350448	0.043	0.052	1	2
Itgb3bp	0.0936323	-0.350395	0.097	0.123	1	2
Nsd2	0.15395	-0.350165	0.163	0.188	1	2
Cep290	0.442362	-0.34979	0.012	0.017	1	2
Ttc39c	0.147012	-0.349696	0.087	0.109	1	2
Scarb1	0.586897	-0.34969	0.008	0.01	1	2
Gpr183	0.350926	-0.349483	0.245	0.263	1	2
Poc5	0.389328	-0.349475	0.055	0.065	1	2
Mcmbp	0.0682771	-0.349055	0.213	0.251	1	2
Zfp760	0.506703	-0.348165	0.026	0.031	1	2
Mx2	0.273258	-0.348152	0.006	0.01	1	2
Syce2	0.283118	-0.348059	0.053	0.065	1	2
Avil	0.938078	-0.347871	0.013	0.013	1	2
Kif9	0.441895	-0.347725	0.016	0.021	1	2
Prrc1	0.110964	-0.347521	0.089	0.114	1	2
Nelfe	0.327308	-0.347465	0.098	0.111	1	2
Polh	0.665068	-0.347428	0.046	0.05	1	2
Sirt7	0.00407235	-0.347421	0.291	0.364	1	2
Naa60	0.388394	-0.347399	0.091	0.103	1	2
Kif23	0.277993	-0.347374	0.059	0.072	1	2
Bak1	0.335941	-0.347185	0.106	0.119	1	2
Mthfd1	0.0674812	-0.346583	0.053	0.075	1	2
Dipk1a	0.0614196	-0.346296	0.237	0.273	1	2
Khk	0.297318	-0.346256	0.065	0.078	1	2
Plekha7	0.801386	-0.345719	0.029	0.031	1	2
Oxa1l	0.00108419	-0.345547	0.114	0.172	1	2
Castor2	0.33817	-0.345538	0.027	0.035	1	2
Etv5	0.804013	-0.345536	0.021	0.019	1	2
Cdkl3	0.223919	-0.345503	0.026	0.036	1	2
Zfyve19	0.255352	-0.34495	0.05	0.063	1	2
Wfs1	0.433711	-0.344489	0.009	0.013	1	2
Nup62	0.347551	-0.344359	0.048	0.058	1	2
Spint2	0.0862477	-0.344247	0.158	0.188	1	2
Snx8	0.796123	-0.343967	0.019	0.021	1	2
Wdr11	0.914123	-0.343812	0.027	0.026	1	2
Tmem67	0.346177	-0.343484	0.016	0.022	1	2
Gbp3	0.137039	-0.343381	0.084	0.106	1	2
Ncor2	0.0667682	-0.343215	0.12	0.151	1	2
Usp30	0.835989	-0.342886	0.035	0.036	1	2
Smpd5	0.223924	-0.342836	0.092	0.11	1	2
Eya3	0.00761381	-0.342822	0.126	0.176	1	2
Rnf8	0.214002	-0.342667	0.079	0.097	1	2
Ifrd2	0.270063	-0.342635	0.02	0.028	1	2
Khdc1c	0.768807	-0.342523	0.009	0.01	1	2
Hopx	0.00239829	-0.342292	0.4	0.47	1	2
Rdh13	0.582739	-0.34221	0.01	0.013	1	2
Skic3	0.0718029	-0.341939	0.096	0.124	1	2
Ifi27	0.0398487	-0.34184	0.327	0.362	1	2
Pdha1	0.0218594	-0.341544	0.202	0.248	1	2
Sart1	0.219102	-0.341533	0.152	0.172	1	2
Pacs2	0.125194	-0.341003	0.059	0.079	1	2
Cant1	0.197225	-0.340936	0.084	0.102	1	2
Stk38l	0.509042	-0.340923	0.04	0.047	1	2
Coprs	0.159778	-0.34091	0.004	0.01	1	2
Abhd17a	0.0125199	-0.340582	0.202	0.254	1	2
4833420G17Rik	0.00674574	-0.340255	0.247	0.309	1	2
Zfp212	0.102176	-0.340083	0.051	0.071	1	2
Hook1	0.514817	-0.34006	0.05	0.057	1	2
Thap3	0.206687	-0.339871	0.199	0.22	1	2
Ctnnbl1	0.0282135	-0.339841	0.178	0.221	1	2
Ngly1	0.0808908	-0.339686	0.186	0.217	1	2
Cldnd2	0.293129	-0.339677	0.051	0.063	1	2
Il2ra	0.481764	-0.33959	0.084	0.094	1	2
Ccdc122	0.62013	-0.339523	0.026	0.03	1	2
Retreg2	0.2192	-0.339304	0.107	0.127	1	2
Deaf1	0.343097	-0.339234	0.051	0.062	1	2
Cybb	0.587756	-0.338611	0.008	0.01	1	2
Sirt5	0.1841	-0.33845	0.048	0.063	1	2
Pygl	0.310512	-0.338338	0.009	0.014	1	2
Zfp667	0.562781	-0.338292	0.016	0.019	1	2
Dnaaf2	0.908895	-0.338159	0.012	0.012	1	2
Crebl2	0.0423444	-0.337908	0.053	0.078	1	2
Thap2	0.375211	-0.337845	0.082	0.093	1	2
Eci1	0.242287	-0.337287	0.172	0.191	1	2
Polr3g	0.476801	-0.336929	0.049	0.057	1	2
Gm42715	0.315034	-0.336755	0.009	0.014	1	2
Usp20	0.333893	-0.336533	0.038	0.048	1	2
Ramp1	0.234349	-0.335941	0.142	0.162	1	2
Fam136a	0.229038	-0.335399	0.064	0.079	1	2
Egr3	0.198745	-0.335396	0.017	0.026	1	2
Kcnc3	0.587326	-0.335383	0.008	0.01	1	2
Arl2bp	0.00794815	-0.335357	0.295	0.345	1	2
Habp4	0.224725	-0.33528	0.04	0.053	1	2
Tspan3	0.0316645	-0.335041	0.055	0.082	1	2
Coa3	0.0160832	-0.334976	0.308	0.361	1	2
Ccdc125	0.144203	-0.334803	0.119	0.142	1	2
Ccnf	0.289637	-0.33472	0.007	0.012	1	2
Ctps	0.447508	-0.334203	0.043	0.05	1	2
Bfar	0.0278409	-0.333474	0.204	0.248	1	2
Serac1	0.817362	-0.33269	0.016	0.014	1	2
Derl2	0.0729235	-0.332385	0.159	0.194	1	2
Tuft1	0.305139	-0.332382	0.008	0.013	1	2
Plekhb2	0.41364	-0.331993	0.074	0.084	1	2
Cyb5a	0.0293646	-0.331943	0.268	0.313	1	2
Cfap46	0.332629	-0.331913	0.012	0.018	1	2
Zfp386	0.183337	-0.331768	0.101	0.122	1	2
Mdm2	0.00690639	-0.331132	0.229	0.288	1	2
Coil	0.824879	-0.330917	0.036	0.034	1	2
ENSMUSG00000095742	0.951844	-0.330878	0.01	0.01	1	2
Pgap2	0.30279	-0.33074	0.155	0.173	1	2
Ino80b	0.0886405	-0.330716	0.125	0.154	1	2
Adamts6	0.116592	-0.330446	0.234	0.264	1	2
Adam17	0.137946	-0.330305	0.209	0.237	1	2
Prkcd	0.816863	-0.329617	0.112	0.114	1	2
Nudt22	0.254127	-0.329518	0.053	0.066	1	2
Ttll8	0.21059	-0.329505	0.008	0.014	1	2
Prdx2	0.0067469	-0.329385	0.39	0.442	1	2
Ctbp1	0.020471	-0.329379	0.248	0.298	1	2
Fbxl9	0.651213	-0.329093	0.021	0.025	1	2
Mex3b	0.637973	-0.328928	0.022	0.026	1	2
Bpnt1	0.120553	-0.328799	0.068	0.089	1	2
Wrap53	0.183547	-0.328441	0.041	0.056	1	2
Zfp142	0.334079	-0.328384	0.051	0.062	1	2
Mrps18a	0.0533087	-0.328126	0.171	0.208	1	2
Clec16a	0.371993	-0.328103	0.093	0.106	1	2
Pold4	0.0137418	-0.327629	0.229	0.278	1	2
Ppt1	0.0956947	-0.327609	0.168	0.198	1	2
Tug1	0.0616509	-0.327184	0.163	0.199	1	2
Inpp5k	0.0542287	-0.326997	0.145	0.181	1	2
Sgcb	0.438162	-0.326697	0.02	0.026	1	2
Cnp	0.0614605	-0.32628	0.188	0.224	1	2
Mrpl49	0.257864	-0.326179	0.095	0.111	1	2
Sdhaf4	0.252765	-0.325982	0.145	0.164	1	2
Ppm1m	0.186429	-0.32598	0.07	0.088	1	2
Cnpy4	0.374708	-0.325838	0.041	0.05	1	2
Zfp598	0.210197	-0.325754	0.074	0.091	1	2
Morc3	0.0194588	-0.325743	0.262	0.313	1	2
Itfg2	0.363867	-0.325662	0.063	0.074	1	2
Ndufaf5	0.41472	-0.325518	0.051	0.061	1	2
Ctsh	0.265371	-0.325511	0.016	0.023	1	2
Echs1	0.152028	-0.325134	0.148	0.173	1	2
Psmd8	0.000122694	-0.325056	0.43	0.517	1	2
Nfrkb	0.101558	-0.324898	0.124	0.153	1	2
Phpt1	0.606604	-0.324893	0.051	0.057	1	2
Hddc2	0.163692	-0.324634	0.109	0.131	1	2
Nvl	0.331231	-0.324424	0.112	0.127	1	2
Prkcsh	0.165972	-0.324199	0.145	0.171	1	2
Col19a1	0.870733	-0.323904	0.011	0.01	1	2
Prrg2	0.345418	-0.323859	0.018	0.025	1	2
Dnajc9	0.0562736	-0.323698	0.216	0.254	1	2
Hmgxb3	0.263356	-0.323668	0.097	0.114	1	2
Ugdh	0.0685545	-0.323624	0.07	0.096	1	2
Mospd1	0.220386	-0.323566	0.044	0.057	1	2
Wdr7	0.286521	-0.323471	0.153	0.171	1	2
Kif16b	0.0412625	-0.323397	0.135	0.172	1	2
Klhdc3	0.26471	-0.323264	0.045	0.057	1	2
Tafa3	0.343849	-0.322389	0.013	0.019	1	2
Ctu2	0.285056	-0.322364	0.075	0.089	1	2
Zfp619	0.436192	-0.322114	0.019	0.025	1	2
Efnb2	0.179277	-0.322009	0.006	0.012	1	2
Tceal9	0.00562815	-0.321904	0.242	0.308	1	2
Aida	0.132653	-0.321885	0.084	0.106	1	2
Pnp	0.0493106	-0.321862	0.173	0.213	1	2
Cul4b	0.298364	-0.321825	0.084	0.098	1	2
Bpgm	0.769307	-0.321595	0.07	0.074	1	2
Tsr3	0.0571167	-0.321338	0.114	0.147	1	2
Cym	0.215031	-0.321335	0.044	0.057	1	2
Rpa3	0.198011	-0.32085	0.166	0.188	1	2
Coa4	0.365946	-0.320795	0.043	0.052	1	2
Ptpn5	0.730432	-0.320479	0.012	0.014	1	2
Klhl36	0.121519	-0.320189	0.047	0.065	1	2
Soat2	0.37482	-0.319865	0.044	0.053	1	2
Fen1	0.0550608	-0.319821	0.104	0.136	1	2
Unc50	0.231638	-0.319146	0.19	0.213	1	2
E2f5	0.280265	-0.318862	0.057	0.07	1	2
Jtb	0.0917985	-0.318253	0.274	0.307	1	2
Mrpl47	0.210768	-0.317983	0.023	0.034	1	2
Rbmxl1	0.11349	-0.317511	0.181	0.211	1	2
Wdr74	0.192008	-0.317137	0.086	0.105	1	2
Cluap1	0.16948	-0.316913	0.062	0.079	1	2
Tubgcp2	0.202861	-0.316877	0.074	0.091	1	2
Prkra	0.20658	-0.316853	0.054	0.069	1	2
Krt83	0.070689	-0.316816	0.035	0.053	1	2
Sec22c	0.613797	-0.316643	0.025	0.028	1	2
Xaf1	0.42004	-0.31652	0.148	0.16	1	2
Emc7	0.00692812	-0.316469	0.284	0.345	1	2
Lap3	0.313441	-0.316292	0.079	0.093	1	2
Fam174c	0.284234	-0.316082	0.077	0.092	1	2
Stk40	0.107025	-0.315983	0.177	0.207	1	2
Mcat	0.527962	-0.315833	0.039	0.045	1	2
Tmem87b	0.120541	-0.31562	0.117	0.145	1	2
Fem1a	0.327935	-0.31558	0.037	0.047	1	2
Agtpbp1	0.826629	-0.315223	0.155	0.157	1	2
Borcs5	0.0948352	-0.315107	0.082	0.106	1	2
Trim47	0.92991	-0.314892	0.011	0.012	1	2
Ubxn11	0.46468	-0.314886	0.05	0.058	1	2
Mrpl50	0.324651	-0.314745	0.085	0.098	1	2
Tnfsf12	0.0226526	-0.314628	0.147	0.19	1	2
Slc50a1	0.0193048	-0.314603	0.403	0.449	1	2
Kif11	0.254774	-0.314465	0.013	0.021	1	2
Nipsnap1	0.626397	-0.313953	0.048	0.053	1	2
Nprl3	0.832723	-0.313793	0.046	0.048	1	2
Furin	0.0233371	-0.313753	0.119	0.159	1	2
Galk2	0.0524994	-0.313514	0.148	0.182	1	2
Naa20	0.308596	-0.313427	0.191	0.208	1	2
Sfn	0.476737	-0.313304	0.035	0.041	1	2
Vrk1	0.0824238	-0.313229	0.164	0.198	1	2
Castor1	0.154	-0.313095	0.046	0.062	1	2
Mex3d	0.41843	-0.313065	0.007	0.01	1	2
Sft2d3	0.165456	-0.313	0.119	0.141	1	2
Pced1a	0.673806	-0.312994	0.05	0.054	1	2
Zc3h4	0.276561	-0.31295	0.128	0.144	1	2
Nabp2	0.0726069	-0.312794	0.166	0.201	1	2
Frg2f1	0.861871	-0.312568	0.015	0.016	1	2
Csgalnact2	0.378459	-0.312127	0.059	0.07	1	2
Amacr	0.97241	-0.312089	0.022	0.022	1	2
Katnip	0.114471	-0.311998	0.1	0.123	1	2
Aftph	0.0713033	-0.311997	0.24	0.278	1	2
Hras	0.0192012	-0.311663	0.178	0.224	1	2
Tollip	0.440641	-0.311597	0.07	0.08	1	2
Entpd6	0.223832	-0.311402	0.1	0.118	1	2
Tcaim	0.274664	-0.311362	0.037	0.048	1	2
Abhd16a	0.197456	-0.310977	0.101	0.12	1	2
Usf3	0.235618	-0.310971	0.106	0.124	1	2
Prps2	0.0574117	-0.310871	0.133	0.167	1	2
Zbtb37	0.329627	-0.3108	0.056	0.067	1	2
Uqcrfs1	0.00284458	-0.310796	0.369	0.436	1	2
Fam83d	0.322536	-0.310499	0.01	0.016	1	2
Coq2	0.104845	-0.310091	0.089	0.114	1	2
Kdm5c	0.0209429	-0.30973	0.261	0.307	1	2
Il20rb	0.282245	-0.309546	0.023	0.032	1	2
Ercc6l2	0.365243	-0.309257	0.068	0.08	1	2
Agk	0.281255	-0.308779	0.084	0.1	1	2
Tnfrsf1a	0.435559	-0.308724	0.077	0.087	1	2
Atad3a	0.198221	-0.308695	0.058	0.074	1	2
Fbrs	0.251172	-0.308549	0.104	0.122	1	2
Inhca	0.980468	-0.308548	0.016	0.016	1	2
Slc25a35	0.589046	-0.308508	0.008	0.01	1	2
Med31	0.232715	-0.30828	0.134	0.154	1	2
Med11	0.159403	-0.308201	0.202	0.229	1	2
Ccpg1	0.0846706	-0.307392	0.068	0.092	1	2
Gps1	0.361701	-0.307322	0.117	0.131	1	2
Taf2	0.565859	-0.307249	0.103	0.111	1	2
Napsa	0.236933	-0.30719	0.206	0.224	1	2
Smcr8	0.474158	-0.307022	0.035	0.041	1	2
Ptprk	0.578982	-0.306928	0.031	0.036	1	2
Ccdc97	0.669392	-0.306883	0.054	0.058	1	2
Pnpo	0.0976838	-0.306415	0.066	0.088	1	2
Enc1	0.0808652	-0.306225	0.062	0.084	1	2
Ppp2r3a	0.0429698	-0.306156	0.074	0.102	1	2
Faap24	0.685195	-0.306147	0.049	0.053	1	2
Nf2	0.358922	-0.305869	0.123	0.138	1	2
Setx	0.0484705	-0.305547	0.234	0.274	1	2
Med9	0.17222	-0.305478	0.048	0.063	1	2
Ptms	0.0430737	-0.304887	0.326	0.373	1	2
Mllt11	0.309213	-0.304699	0.046	0.057	1	2
Pdcl3	0.0333659	-0.304464	0.234	0.277	1	2
Ankmy2	0.683061	-0.304418	0.091	0.096	1	2
Hspb6	0.273258	-0.304274	0.006	0.01	1	2
Bcl10	0.14808	-0.304096	0.353	0.379	1	2
Ctss	0.0211424	-0.304091	0.2	0.25	1	2
Trim21	0.788017	-0.304045	0.04	0.043	1	2
Gss	0.413527	-0.303011	0.028	0.035	1	2
Nudt9	0.0464128	-0.302458	0.102	0.135	1	2
Msl1	0.0416573	-0.302371	0.141	0.177	1	2
Igf1r	0.272054	-0.302364	0.088	0.103	1	2
B4galt5	0.0478047	-0.30221	0.364	0.393	1	2
Cntln	0.0690657	-0.302189	0.048	0.07	1	2
Aktip	0.28821	-0.301784	0.028	0.038	1	2
Taf6	0.562624	-0.301598	0.046	0.052	1	2
Pear1	0.136478	-0.301465	0.172	0.199	1	2
Pinx1	0.378503	-0.301436	0.06	0.071	1	2
Lman1	0.530444	-0.301423	0.115	0.123	1	2
Ehbp1l1	0.234326	-0.301214	0.169	0.19	1	2
Sgta	0.168632	-0.301073	0.133	0.158	1	2
Ankrd9	0.729818	-0.301058	0.025	0.027	1	2
Gna11	0.733514	-0.300927	0.063	0.066	1	2
Pdlim7	0.170907	-0.30085	0.064	0.082	1	2
Trim30a	0.162295	-0.300573	0.356	0.386	1	2
Fech	0.730195	-0.300424	0.06	0.063	1	2
Slc29a3	0.416603	-0.300255	0.027	0.034	1	2
Cd96	0.0811861	-0.300143	0.254	0.287	1	2
Trim17	0.973027	-0.300139	0.026	0.026	1	2
Zfp54	0.536359	-0.299868	0.019	0.023	1	2
Cdc5l	0.0511909	-0.299596	0.267	0.313	1	2
Rad50	0.0999921	-0.299571	0.149	0.177	1	2
Wdr81	0.490502	-0.299438	0.031	0.038	1	2
Dapl1	0.202924	-0.299333	0.018	0.027	1	2
Cox6a2	0.561188	-0.299168	0.047	0.053	1	2
Clip2	0.264063	-0.299144	0.041	0.053	1	2
Mthfsl	0.0425991	-0.299092	0.134	0.171	1	2
Camk1	0.100939	-0.299072	0.025	0.039	1	2
Rint1	0.687559	-0.29899	0.07	0.075	1	2
Slc25a45	0.326038	-0.298883	0.036	0.045	1	2
Ikzf2	0.00432653	-0.298812	0.262	0.329	1	2
Fez2	0.539033	-0.298661	0.093	0.101	1	2
Itprip	0.924039	-0.298396	0.027	0.026	1	2
Guf1	0.502757	-0.297648	0.044	0.05	1	2
Pgrmc2	0.181355	-0.297647	0.086	0.106	1	2
Dusp28	0.764122	-0.297638	0.032	0.035	1	2
Dnai4	0.567883	-0.297532	0.015	0.018	1	2
Zfyve16	0.498402	-0.297514	0.101	0.089	1	2
Trappc14	0.204231	-0.297287	0.057	0.072	1	2
Commd1	0.274284	-0.297125	0.216	0.237	1	2
Hrh2	0.13713	-0.296812	0.092	0.114	1	2
2300009A05Rik	0.254314	-0.296544	0.139	0.158	1	2
Garin5a	0.441369	-0.296463	0.011	0.016	1	2
Slc12a9	0.172111	-0.296156	0.027	0.039	1	2
Rrp15	0.565221	-0.296082	0.104	0.113	1	2
Lamp2	0.070552	-0.295789	0.232	0.266	1	2
Grk4	0.547539	-0.295734	0.048	0.054	1	2
Tmem263	0.567354	-0.295611	0.069	0.076	1	2
Atp23	0.22256	-0.294977	0.038	0.05	1	2
BC031181	0.00107911	-0.294971	0.481	0.554	1	2
Tacstd2	0.585407	-0.294952	0.01	0.013	1	2
Ppp1r9b	0.112025	-0.294489	0.183	0.213	1	2
Fbxo21	0.615459	-0.29413	0.039	0.044	1	2
Fibp	0.282945	-0.294029	0.152	0.169	1	2
Prkar2b	0.757595	-0.29382	0.01	0.012	1	2
S100a4	0.553079	-0.29334	0.282	0.291	1	2
Slfn1	0.432373	-0.293269	0.009	0.013	1	2
Sprtn	0.326818	-0.29291	0.035	0.044	1	2
Srek1ip1	0.333985	-0.292795	0.083	0.096	1	2
9930104L06Rik	0.420293	-0.292784	0.03	0.038	1	2
Chpf2	0.33887	-0.292599	0.031	0.04	1	2
Ppm1k	0.451489	-0.292289	0.065	0.074	1	2
Iscu	0.0307806	-0.291991	0.209	0.254	1	2
Dnajc25	0.141875	-0.291514	0.088	0.11	1	2
Ckb	0.319589	-0.291402	0.04	0.05	1	2
Ppp1r7	0.143385	-0.291325	0.151	0.176	1	2
Rab12	0.150399	-0.291288	0.098	0.122	1	2
Mybl1	0.588186	-0.29128	0.008	0.01	1	2
Arap3	0.527296	-0.290978	0.077	0.085	1	2
Fahd2a	0.0884445	-0.290948	0.057	0.079	1	2
Grap	0.00226253	-0.290931	0.276	0.349	1	2
Rhobtb1	0.273551	-0.290849	0.006	0.01	1	2
Lmo4	0.0296874	-0.290664	0.215	0.26	1	2
Marcks	0.439063	-0.290077	0.019	0.025	1	2
Trim37	0.740843	-0.289985	0.064	0.067	1	2
Xylt2	0.61358	-0.289895	0.053	0.058	1	2
Eid2	0.965881	-0.289616	0.015	0.014	1	2
Xpnpep3	0.293047	-0.289123	0.093	0.109	1	2
Slc30a4	0.442618	-0.288984	0.017	0.022	1	2
Gngt2	0.464284	-0.288751	0.081	0.091	1	2
Ppme1	0.0899044	-0.28871	0.198	0.234	1	2
Abhd13	0.25795	-0.288694	0.049	0.062	1	2
Tmem254	0.0648567	-0.288557	0.238	0.276	1	2
Tor2a	0.419162	-0.288445	0.13	0.141	1	2
Kremen1	0.66652	-0.288374	0.044	0.048	1	2
Aifm1	0.687733	-0.288138	0.086	0.091	1	2
Hipk3	0.0777887	-0.288128	0.167	0.201	1	2
Stx12	0.358365	-0.287875	0.094	0.107	1	2
Ufc1	0.00373167	-0.287826	0.341	0.409	1	2
Tmem33	0.216431	-0.287666	0.197	0.219	1	2
Acadvl	0.203859	-0.287646	0.129	0.15	1	2
Yif1a	0.535972	-0.287358	0.089	0.097	1	2
Mboat1	0.909316	-0.287052	0.046	0.047	1	2
Spata1	0.987542	-0.286675	0.089	0.088	1	2
Ints5	0.439758	-0.286107	0.018	0.023	1	2
AU022252	0.635069	-0.286	0.037	0.041	1	2
Ccm2	0.034742	-0.285999	0.414	0.466	1	2
Gon7	0.24317	-0.285971	0.106	0.124	1	2
Nol9	0.877658	-0.285966	0.065	0.066	1	2
Invs	0.314553	-0.285901	0.065	0.078	1	2
Wrap73	0.0988291	-0.285733	0.079	0.103	1	2
Wdr83	0.221804	-0.28571	0.067	0.083	1	2
Senp8	0.86849	-0.285654	0.011	0.01	1	2
Tada2b	0.980714	-0.285647	0.044	0.044	1	2
Btk	0.837006	-0.284884	0.01	0.009	1	2
Sh2d3c	0.29292	-0.284653	0.253	0.269	1	2
Tnfsf14	0.900262	-0.284479	0.095	0.096	1	2
Atp6v0c	0.00426931	-0.28416	0.487	0.55	1	2
Lypla1	0.256063	-0.284107	0.098	0.115	1	2
Thg1l	0.859342	-0.283587	0.025	0.026	1	2
Mrtfb	0.107966	-0.283369	0.161	0.191	1	2
Adck5	0.283581	-0.283367	0.031	0.041	1	2
Fbxo24	0.54084	-0.283152	0.02	0.025	1	2
Fbxo17	0.529096	-0.283138	0.043	0.049	1	2
Pik3r6	0.342661	-0.283011	0.013	0.019	1	2
Eif2b4	0.187202	-0.282978	0.091	0.11	1	2
Cdk5rap3	0.0650695	-0.282944	0.216	0.255	1	2
Mrpl38	0.453248	-0.282907	0.112	0.123	1	2
Ncapd3	0.548589	-0.282707	0.174	0.184	1	2
Arl5a	0.23696	-0.282677	0.249	0.269	1	2
Col20a1	0.434716	-0.282402	0.009	0.013	1	2
Osbpl5	0.213243	-0.28205	0.072	0.088	1	2
Mtmr14	0.241077	-0.282041	0.154	0.173	1	2
Senp3	0.336767	-0.281907	0.07	0.083	1	2
Kcng3	0.957916	-0.28162	0.01	0.01	1	2
2310009B15Rik	0.716442	-0.281033	0.085	0.089	1	2
Insr	0.384335	-0.280977	0.101	0.113	1	2
Mrpl32	0.0600538	-0.280596	0.252	0.287	1	2
Camk1d	8.0691e-05	-0.28057	0.846	0.884	1	2
Pheta1	0.764108	-0.280533	0.01	0.012	1	2
Hecw2	0.738208	-0.280472	0.012	0.014	1	2
Ccdc85c	0.587326	-0.280197	0.008	0.01	1	2
Zbtb5	0.925636	-0.279874	0.055	0.056	1	2
Rab4b	0.350093	-0.279845	0.019	0.026	1	2
Parp14	0.0988681	-0.27975	0.213	0.247	1	2
Pus3	0.244581	-0.279527	0.062	0.076	1	2
Prmt7	0.564796	-0.279503	0.058	0.065	1	2
Ap3s1	0.183486	-0.279452	0.318	0.338	1	2
Rgs18	0.0493	-0.279372	0.043	0.065	1	2
Poglut1	0.33582	-0.27932	0.031	0.04	1	2
Eif2ak2	0.327385	-0.279315	0.092	0.106	1	2
Ulk3	0.749351	-0.279238	0.035	0.038	1	2
Mrpl9	0.0328776	-0.2787	0.287	0.334	1	2
Abcd1	0.0666125	-0.278534	0.079	0.106	1	2
Dnmt1	0.416696	-0.278524	0.176	0.188	1	2
Tmem175	0.43998	-0.278278	0.088	0.098	1	2
Akr7a5	0.15055	-0.278163	0.051	0.069	1	2
Atg3	0.00538675	-0.278091	0.331	0.401	1	2
C2cd2	0.954716	-0.277869	0.066	0.066	1	2
Lmbrd2	0.467348	-0.277575	0.078	0.088	1	2
N4bp2l1	0.169034	-0.277373	0.111	0.133	1	2
Trappc2	0.680947	-0.277282	0.053	0.057	1	2
Myo5a	0.864893	-0.27725	0.034	0.035	1	2
Nudt21	0.0141015	-0.277034	0.319	0.379	1	2
Peds1	0.31146	-0.276937	0.149	0.164	1	2
Ifi47	0.209596	-0.276826	0.274	0.3	1	2
Fignl1	0.577182	-0.276736	0.012	0.016	1	2
Mea1	0.230474	-0.276691	0.158	0.179	1	2
Metrn	0.225264	-0.276609	0.048	0.062	1	2
Sh3bp5	0.480364	-0.276329	0.064	0.072	1	2
Tbp	0.225018	-0.276304	0.053	0.067	1	2
Rhbdd2	0.337675	-0.276162	0.037	0.047	1	2
Psmb10	0.0113588	-0.275965	0.55	0.585	1	2
Clec2i	0.248995	-0.275895	0.24	0.259	1	2
Dck	0.292931	-0.275742	0.053	0.065	1	2
Ccdc134	0.83352	-0.275641	0.065	0.067	1	2
Stx3	0.993931	-0.275568	0.039	0.039	1	2
Gm12258	0.553989	-0.275539	0.018	0.022	1	2
Ccdc107	0.328813	-0.275432	0.139	0.155	1	2
Pigx	0.065995	-0.275369	0.188	0.225	1	2
Naif1	0.567883	-0.27528	0.015	0.018	1	2
Med20	0.177733	-0.27514	0.097	0.119	1	2
Mrps31	0.876841	-0.27504	0.084	0.085	1	2
2700097O09Rik	0.742635	-0.274933	0.074	0.069	1	2
Prdx3	0.498104	-0.274897	0.173	0.185	1	2
Mink1	0.430893	-0.274735	0.095	0.106	1	2
Zfp101	0.339361	-0.274692	0.03	0.039	1	2
Ypel3	0.016331	-0.274664	0.471	0.519	1	2
Rps2	9.99075e-10	-0.274191	0.984	0.981	1.65347e-05	2
Nprl2	0.297889	-0.27402	0.05	0.062	1	2
Faah	0.416418	-0.27395	0.091	0.102	1	2
Stx18	0.319245	-0.273718	0.174	0.191	1	2
Tecpr1	0.00859927	-0.273712	0.435	0.497	1	2
Lrrcc1	0.515718	-0.273708	0.078	0.087	1	2
Tmub2	0.100844	-0.273389	0.078	0.102	1	2
Ttc5	0.228974	-0.273236	0.183	0.204	1	2
Dvl3	0.353555	-0.273071	0.053	0.063	1	2
Fam193b	0.624505	-0.272995	0.1	0.106	1	2
Patz1	0.361975	-0.272799	0.066	0.078	1	2
Trdmt1	0.650929	-0.27276	0.021	0.025	1	2
Nudt4	0.346401	-0.27274	0.238	0.255	1	2
Hdhd2	0.705046	-0.272502	0.088	0.093	1	2
Zfp715	0.375315	-0.272436	0.062	0.072	1	2
Cfap298	0.186147	-0.272331	0.062	0.079	1	2
Vdac2	0.00119713	-0.272284	0.445	0.524	1	2
2900026A02Rik	0.0802892	-0.272272	0.07	0.094	1	2
Sdhc	0.176411	-0.272023	0.16	0.182	1	2
Gabpa	0.504679	-0.271873	0.112	0.122	1	2
Brms1l	0.301027	-0.271813	0.081	0.094	1	2
Prc1	0.55342	-0.271686	0.028	0.023	1	2
Pgam1	0.0268286	-0.271676	0.341	0.392	1	2
Dbp	0.485741	-0.271366	0.032	0.039	1	2
Nit1	0.851069	-0.271116	0.081	0.083	1	2
Nrg2	0.2883	-0.271044	0.03	0.04	1	2
Sema4c	0.579877	-0.270802	0.031	0.036	1	2
Vps26b	0.434733	-0.270648	0.092	0.103	1	2
U2af1	0.0106	-0.270632	0.497	0.542	1	2
Sos1	0.0707376	-0.270536	0.132	0.164	1	2
Tmem170b	0.155971	-0.270239	0.062	0.08	1	2
Fcgr2b	0.478064	-0.26989	0.053	0.061	1	2
Fiz1	0.209374	-0.269508	0.063	0.079	1	2
Slc14a1	0.579621	-0.269139	0.253	0.257	1	2
Zfand1	0.273707	-0.269068	0.063	0.076	1	2
Glmn	0.823399	-0.268942	0.057	0.054	1	2
Rasgrp2	0.139828	-0.268611	0.324	0.349	1	2
Ccdc137	0.726491	-0.268546	0.055	0.058	1	2
Ccdc17	0.578562	-0.268444	0.012	0.016	1	2
Fbxw5	0.41626	-0.268364	0.054	0.063	1	2
Nol6	0.352967	-0.268333	0.05	0.061	1	2
Ddah1	0.674757	-0.268299	0.018	0.021	1	2
Znhit1	0.193471	-0.267913	0.087	0.106	1	2
Exd2	0.122068	-0.267653	0.056	0.075	1	2
Ccng1	0.09427	-0.2676	0.132	0.162	1	2
Mfsd14a	0.332163	-0.267575	0.109	0.123	1	2
Fndc3b	0.701817	-0.267403	0.144	0.149	1	2
Cutc	0.804716	-0.267334	0.082	0.084	1	2
Slc35e3	0.818089	-0.267114	0.018	0.019	1	2
Ireb2	0.22511	-0.267024	0.141	0.163	1	2
Dctn5	0.175506	-0.266916	0.106	0.128	1	2
Ipmk	0.694095	-0.266916	0.091	0.096	1	2
Tsen15	0.18374	-0.266794	0.047	0.062	1	2
Asb8	0.20855	-0.266778	0.085	0.103	1	2
Siae	0.247429	-0.266736	0.056	0.07	1	2
St6gal1	0.342875	-0.26654	0.081	0.093	1	2
Bin3	0.248961	-0.266525	0.196	0.216	1	2
Rabep2	0.322479	-0.266383	0.102	0.118	1	2
Cnpy3	0.246355	-0.266363	0.109	0.127	1	2
H2-Ob	0.681892	-0.266094	0.03	0.034	1	2
Snx11	0.250156	-0.265985	0.062	0.076	1	2
Eva1b	0.254286	-0.265865	0.075	0.091	1	2
Ak3	0.356637	-0.265628	0.15	0.166	1	2
Atpsckmt	0.113901	-0.265518	0.1	0.124	1	2
R3hdm4	0.167953	-0.265388	0.192	0.219	1	2
Gpat3	0.970117	-0.265346	0.066	0.066	1	2
Zfp407	0.0366017	-0.265077	0.403	0.444	1	2
Gpsm3	0.0145643	-0.264954	0.494	0.55	1	2
Dcbld2	0.865682	-0.264877	0.015	0.016	1	2
Zfp787	0.168447	-0.264644	0.162	0.189	1	2
Zfp995	0.350183	-0.264477	0.025	0.032	1	2
Tbc1d31	0.834687	-0.264412	0.029	0.027	1	2
Arsk	0.824125	-0.264319	0.038	0.04	1	2
Milr1	0.279096	-0.264313	0.036	0.047	1	2
Bcl9l	0.241005	-0.264287	0.157	0.177	1	2
Eif3d	0.0258571	-0.264166	0.327	0.373	1	2
Mis12	0.499507	-0.263949	0.06	0.069	1	2
Degs1	0.256665	-0.263659	0.206	0.226	1	2
Rtp4	0.137514	-0.263325	0.069	0.089	1	2
Rcbtb2	0.404565	-0.26331	0.17	0.184	1	2
Atxn7l3	0.335408	-0.263241	0.097	0.111	1	2
S1pr5	0.367054	-0.262894	0.14	0.155	1	2
Snap47	0.216293	-0.262562	0.057	0.072	1	2
Treml2	0.42971	-0.262481	0.045	0.053	1	2
Neto2	0.781801	-0.262187	0.03	0.032	1	2
Pnpla7	0.411517	-0.262098	0.1	0.111	1	2
Polr1g	0.837586	-0.262061	0.036	0.038	1	2
Spns2	0.589046	-0.261661	0.008	0.01	1	2
Exoc8	0.838591	-0.261648	0.027	0.028	1	2
Tmem109	0.743034	-0.261497	0.089	0.093	1	2
Abcf2	0.678373	-0.261387	0.075	0.08	1	2
Polg	0.444048	-0.261378	0.072	0.082	1	2
Pdrg1	0.194192	-0.261349	0.237	0.263	1	2
Nudt18	0.200837	-0.261153	0.083	0.101	1	2
Nradd	0.442595	-0.260894	0.011	0.016	1	2
Limd2	0.00187898	-0.260224	0.636	0.695	1	2
Rtraf	0.00656401	-0.260056	0.492	0.543	1	2
Shld3	0.667614	-0.259884	0.032	0.036	1	2
Hmgn5	0.0623411	-0.259714	0.168	0.203	1	2
Nsfl1c	0.0270645	-0.25966	0.174	0.217	1	2
Prelid3b	0.373575	-0.259649	0.125	0.14	1	2
Mpv17l	0.193267	-0.259558	0.039	0.053	1	2
Foxd2	0.835119	-0.259537	0.01	0.009	1	2
Rom1	0.897949	-0.259497	0.03	0.031	1	2
Mrpl37	0.0521976	-0.25933	0.043	0.065	1	2
Zscan29	0.374611	-0.259204	0.064	0.075	1	2
Zfp764	0.527508	-0.258736	0.012	0.009	1	2
Psmg1	0.307908	-0.258454	0.081	0.094	1	2
Dsn1	0.467892	-0.25824	0.037	0.044	1	2
Blvrb	0.457569	-0.257787	0.054	0.062	1	2
Selenoi	0.657109	-0.257733	0.075	0.069	1	2
4933434E20Rik	0.030145	-0.257462	0.109	0.146	1	2
Podnl1	0.280553	-0.257351	0.036	0.047	1	2
Tlr1	0.579726	-0.257348	0.011	0.014	1	2
Vcpip1	0.0785585	-0.257308	0.145	0.179	1	2
E130311K13Rik	0.543695	-0.257229	0.019	0.023	1	2
Zfp467	0.550878	-0.257146	0.018	0.022	1	2
Fam110b	0.585789	-0.25714	0.01	0.013	1	2
Ankrd16	0.151249	-0.25709	0.093	0.115	1	2
Dcaf10	0.0306206	-0.257071	0.115	0.154	1	2
Rpgr	0.821494	-0.257035	0.047	0.049	1	2
Eif3f	1.19976e-05	-0.257032	0.808	0.837	0.19856	2
Pctp	0.878437	-0.256967	0.049	0.05	1	2
Dmac1	0.11764	-0.25675	0.224	0.255	1	2
Rtca	0.646293	-0.256634	0.054	0.048	1	2
Tmem170	0.668216	-0.256614	0.019	0.022	1	2
Zhx1	0.562098	-0.256549	0.089	0.097	1	2
Cd6	0.580312	-0.256545	0.023	0.019	1	2
Chmp6	0.411466	-0.256391	0.097	0.109	1	2
Gpr160	0.334838	-0.256366	0.103	0.118	1	2
Ppa1	0.412574	-0.256342	0.097	0.11	1	2
Hadhb	0.0889876	-0.256063	0.285	0.329	1	2
Chst10	0.134276	-0.256048	0.013	0.023	1	2
Cd200r2	0.442948	-0.255967	0.016	0.021	1	2
Med19	0.268447	-0.255952	0.098	0.115	1	2
Trim11	0.396054	-0.25583	0.093	0.105	1	2
Gm8797	0.685584	-0.255814	0.043	0.047	1	2
Bcl2l12	0.378175	-0.25546	0.07	0.082	1	2
Xpa	0.205959	-0.255363	0.217	0.243	1	2
Slc24a2	0.336026	-0.255299	0.012	0.018	1	2
Dyrk1b	0.952496	-0.255161	0.021	0.021	1	2
Pmf1	0.446907	-0.254881	0.088	0.098	1	2
Thap11	0.835624	-0.254795	0.062	0.063	1	2
Rnf14	0.10878	-0.25438	0.2	0.232	1	2
Ifi211	0.747084	-0.254376	0.058	0.054	1	2
Wdcp	0.646757	-0.254131	0.046	0.05	1	2
Psmd2	0.272238	-0.25408	0.183	0.206	1	2
Heatr1	0.599547	-0.254025	0.076	0.083	1	2
Ate1	0.407998	-0.254019	0.142	0.155	1	2
Serf1	0.350115	-0.25361	0.021	0.028	1	2
Nfyb	0.298202	-0.253494	0.186	0.204	1	2
Tmem165	0.0141194	-0.253422	0.189	0.242	1	2
Reep4	0.508414	-0.25341	0.057	0.065	1	2
Cnnm3	0.682759	-0.253326	0.051	0.056	1	2
Fbxw8	0.0827498	-0.253257	0.117	0.147	1	2
Gtf2h3	0.357394	-0.25322	0.05	0.061	1	2
Bcas2	0.00766929	-0.253073	0.421	0.488	1	2
Ap4m1	0.926972	-0.253047	0.037	0.038	1	2
Reep3	0.172852	-0.252949	0.163	0.188	1	2
Atp8a2	0.830192	-0.252915	0.017	0.018	1	2
Crnkl1	0.110032	-0.252701	0.148	0.179	1	2
Ppp1r35	0.0739061	-0.252007	0.144	0.18	1	2
Zfp983	0.166359	-0.251757	0.068	0.087	1	2
Dnajc18	0.80866	-0.251746	0.056	0.058	1	2
Slc25a4	0.0998906	-0.251667	0.266	0.299	1	2
Ddb1	0.460926	-0.251637	0.164	0.177	1	2
Asf1a	0.0464592	-0.251603	0.121	0.154	1	2
Paics	0.0632291	-0.251565	0.183	0.223	1	2
Fubp3	0.409423	-0.251499	0.056	0.066	1	2
Ttc13	0.560444	-0.251448	0.082	0.089	1	2
Gm20422	0.903312	-0.251426	0.012	0.013	1	2
Rraga	0.252495	-0.250838	0.144	0.164	1	2
Rasal2	0.674029	-0.250596	0.03	0.034	1	2
Gatad1	0.434034	-0.250359	0.164	0.179	1	2
Pycard	0.0291593	-0.25013	0.642	0.662	1	2
Hnrnpl	0.0584804	-0.249963	0.403	0.437	1	2
Prr14	0.101292	-0.249893	0.131	0.16	1	2
Parvg	0.9866	-0.249773	0.125	0.124	1	2
Cpm	0.837748	-0.249499	0.027	0.028	1	2
Osbp	0.123827	-0.249168	0.107	0.133	1	2
Kiz	0.937387	-0.249	0.089	0.089	1	2
Trp53rkb	0.33234	-0.248576	0.037	0.047	1	2
5031439G07Rik	0.652382	-0.248436	0.058	0.063	1	2
Ptpn3	0.460859	-0.247974	0.04	0.048	1	2
Brap	0.309883	-0.247945	0.159	0.176	1	2
Trmt13	0.236992	-0.247875	0.093	0.11	1	2
Shisa5	1.01062e-05	-0.247556	0.904	0.928	0.167258	2
Tex264	0.114733	-0.247542	0.089	0.114	1	2
Asnsd1	0.229065	-0.247484	0.112	0.132	1	2
Ubl7	0.771641	-0.247087	0.111	0.114	1	2
Gga2	0.770193	-0.246986	0.009	0.01	1	2
Tusc2	0.212819	-0.2464	0.076	0.093	1	2
Uqcc3	0.0326268	-0.246237	0.257	0.307	1	2
Rnh1	0.081464	-0.24619	0.338	0.379	1	2
Tnfsf8	0.615372	-0.246189	0.113	0.12	1	2
Rnf170	0.576262	-0.246172	0.045	0.05	1	2
Bbln	0.107132	-0.246136	0.245	0.279	1	2
Slc25a19	0.691525	-0.246116	0.053	0.057	1	2
Gm20517	0.349115	-0.246105	0.03	0.039	1	2
Mrpl46	0.0869517	-0.245937	0.124	0.155	1	2
Dph2	0.772694	-0.245781	0.015	0.013	1	2
AW209491	0.643206	-0.245658	0.022	0.026	1	2
Hspb11	0.463528	-0.245527	0.036	0.043	1	2
Kat5	0.357383	-0.245425	0.067	0.079	1	2
Vps52	0.725663	-0.245363	0.086	0.091	1	2
Taf11	0.341941	-0.245302	0.188	0.202	1	2
Ccnk	0.256	-0.245212	0.168	0.188	1	2
Bmpr2	0.637883	-0.245109	0.093	0.1	1	2
Akr1b10	0.716206	-0.245023	0.083	0.088	1	2
Brd8	0.121066	-0.244995	0.208	0.237	1	2
Gnpda2	0.322774	-0.244891	0.132	0.147	1	2
Serpinb6a	0.180177	-0.244806	0.144	0.171	1	2
Nup54	0.306424	-0.244711	0.125	0.142	1	2
Napa	0.139591	-0.244632	0.257	0.287	1	2
Tap1	0.0231875	-0.244629	0.236	0.29	1	2
Mrpl43	0.167139	-0.244594	0.271	0.301	1	2
Tmbim1	0.591073	-0.244474	0.062	0.067	1	2
Zbed3	0.441658	-0.244444	0.043	0.05	1	2
Gtf2b	0.0762582	-0.244333	0.295	0.339	1	2
Hira	0.23059	-0.24394	0.043	0.056	1	2
Zbtb17	0.209756	-0.243922	0.066	0.083	1	2
Gart	0.127632	-0.243871	0.065	0.085	1	2
Ak6	0.222231	-0.243474	0.072	0.088	1	2
Iqsec2	0.573812	-0.243414	0.013	0.017	1	2
Nipsnap2	0.397017	-0.243364	0.129	0.142	1	2
Ndufs7	0.0313667	-0.243353	0.417	0.466	1	2
Acads	0.0213521	-0.242722	0.142	0.188	1	2
Tmem106a	0.212048	-0.242596	0.008	0.014	1	2
Aldh16a1	0.918093	-0.242345	0.049	0.048	1	2
Tubg1	0.639313	-0.242315	0.036	0.04	1	2
Kxd1	0.0782788	-0.2423	0.298	0.332	1	2
Mrps35	0.155258	-0.241913	0.103	0.127	1	2
Zfp53	0.182437	-0.241911	0.195	0.223	1	2
Unc5cl	0.276928	-0.241793	0.03	0.04	1	2
Arpc4	0.0194718	-0.241651	0.513	0.554	1	2
Nmnat3	0.911341	-0.241584	0.069	0.067	1	2
Thap1	0.765263	-0.241525	0.044	0.047	1	2
Sele	0.0723379	-0.241507	0.023	0.012	1	2
Rrp1	0.0156276	-0.241463	0.317	0.373	1	2
Arhgdia	0.00543755	-0.241414	0.575	0.622	1	2
BC055324	0.871631	-0.241263	0.011	0.01	1	2
Sra1	0.0636786	-0.241084	0.351	0.387	1	2
Cbx8	0.457065	-0.241055	0.038	0.045	1	2
Atg12	0.507469	-0.241046	0.238	0.25	1	2
Itih5	0.253476	-0.240997	0.078	0.094	1	2
P4hb	0.041328	-0.240703	0.265	0.313	1	2
Rap2b	0.181679	-0.240634	0.233	0.257	1	2
Osbpl7	0.539171	-0.24063	0.06	0.067	1	2
Get1	0.439534	-0.240539	0.011	0.016	1	2
Racgap1	0.322746	-0.240533	0.147	0.162	1	2
Timm8a1	0.281718	-0.240443	0.119	0.136	1	2
Ift172	0.154984	-0.240303	0.06	0.079	1	2
Steap3	0.336879	-0.240172	0.029	0.038	1	2
Kmt2d	0.407523	-0.240143	0.13	0.144	1	2
Zmat5	0.0526535	-0.240136	0.263	0.305	1	2
Flad1	0.46744	-0.240056	0.068	0.078	1	2
Elp3	0.265199	-0.239774	0.062	0.075	1	2
Bicra	0.13342	-0.239713	0.202	0.232	1	2
Serp2	0.527842	-0.239563	0.053	0.06	1	2
Map2k7	0.380959	-0.239523	0.073	0.084	1	2
Nav1	0.220047	-0.239475	0.04	0.053	1	2
Acbd4	0.536044	-0.239366	0.038	0.044	1	2
Tmem268	0.766961	-0.239184	0.022	0.025	1	2
A430033K04Rik	0.709064	-0.23914	0.028	0.031	1	2
Hells	0.936126	-0.238553	0.037	0.038	1	2
Prdx4	0.476614	-0.238356	0.038	0.045	1	2
Egr2	0.586383	-0.238314	0.031	0.036	1	2
Acer2	0.765117	-0.238019	0.009	0.01	1	2
Csnk2a2	0.0835001	-0.237702	0.209	0.248	1	2
Tia1	0.37326	-0.23766	0.204	0.221	1	2
Parp10	0.138372	-0.237657	0.064	0.083	1	2
Pgm3	0.291391	-0.237512	0.059	0.072	1	2
Capn7	0.323494	-0.237497	0.19	0.21	1	2
Tg	0.69122	-0.237486	0.059	0.054	1	2
Trappc13	0.489105	-0.23729	0.072	0.082	1	2
Arid2	0.196748	-0.237052	0.256	0.283	1	2
Trnt1	0.197012	-0.237029	0.125	0.146	1	2
Smg7	0.0370684	-0.236762	0.329	0.379	1	2
Tpgs1	0.0907725	-0.236735	0.133	0.164	1	2
Slc25a47	0.731985	-0.236721	0.012	0.014	1	2
Pebp1	0.0207434	-0.236625	0.456	0.507	1	2
Dennd6a	0.147886	-0.236576	0.124	0.15	1	2
Slc10a7	0.261416	-0.23639	0.208	0.233	1	2
Samd9l	0.00492901	-0.236235	0.396	0.471	1	2
Pla2g6	0.772381	-0.236154	0.027	0.025	1	2
Ccne2	0.903751	-0.235818	0.012	0.012	1	2
Kptn	0.637877	-0.235724	0.064	0.07	1	2
Bloc1s2	0.025543	-0.235695	0.229	0.282	1	2
Rpp38	0.379891	-0.235675	0.036	0.044	1	2
Atxn10	0.0564638	-0.23562	0.22	0.26	1	2
Tmem183a	0.189108	-0.235473	0.14	0.162	1	2
Bloc1s4	0.949702	-0.235402	0.132	0.128	1	2
Hdac1	0.0482032	-0.235372	0.304	0.344	1	2
Kcnk7	0.562781	-0.234591	0.016	0.019	1	2
Khsrp	0.482588	-0.234425	0.168	0.18	1	2
Atg4d	0.351721	-0.23428	0.107	0.122	1	2
Mettl9	0.226425	-0.234273	0.124	0.145	1	2
Lysmd2	0.658012	-0.234181	0.048	0.053	1	2
Cpsf4	0.301084	-0.234089	0.044	0.054	1	2
Zc2hc1a	0.832456	-0.233533	0.037	0.039	1	2
Psd4	0.478578	-0.233498	0.245	0.255	1	2
Abcd4	0.278303	-0.233409	0.036	0.047	1	2
Pdk1	0.995024	-0.233364	0.085	0.084	1	2
Glrx3	0.0297008	-0.233176	0.377	0.428	1	2
Zfp574	0.501949	-0.232801	0.057	0.065	1	2
Grsf1	0.449301	-0.232705	0.082	0.092	1	2
Sirt3	0.36362	-0.232598	0.106	0.12	1	2
Samd8	0.297958	-0.23245	0.142	0.162	1	2
Sec23ip	0.465801	-0.232221	0.053	0.061	1	2
Paxbp1	0.24957	-0.232181	0.147	0.169	1	2
Phka1	0.50846	-0.232154	0.062	0.07	1	2
Taf1c	0.704139	-0.232115	0.028	0.031	1	2
Rmnd5b	0.331934	-0.232009	0.144	0.162	1	2
Tprn	0.447401	-0.231913	0.015	0.019	1	2
Itga1	0.956135	-0.231772	0.066	0.065	1	2
1700020L24Rik	0.91402	-0.231249	0.04	0.039	1	2
Mkks	0.849734	-0.231201	0.017	0.016	1	2
Traf3ip1	0.695988	-0.230918	0.029	0.032	1	2
Cnga1	0.129733	-0.230792	0.012	0.022	1	2
Spryd4	0.966247	-0.230459	0.018	0.018	1	2
Rpp30	0.3	-0.23021	0.089	0.105	1	2
Tbc1d25	0.942362	-0.230155	0.02	0.021	1	2
H1f4	0.0558865	-0.230054	0.535	0.563	1	2
Aptx	0.343938	-0.229862	0.064	0.076	1	2
Cbx4	0.0443861	-0.229836	0.308	0.358	1	2
Mrps7	0.114855	-0.229786	0.174	0.206	1	2
Blvra	0.297334	-0.229621	0.094	0.11	1	2
Gypc	0.842841	-0.229575	0.035	0.036	1	2
Rhbdd1	0.793155	-0.229575	0.145	0.147	1	2
Ccs	0.094082	-0.229319	0.144	0.177	1	2
Atxn3	0.210958	-0.229201	0.098	0.118	1	2
Ggta1	0.276478	-0.229151	0.134	0.153	1	2
Dnajc14	0.562631	-0.228894	0.093	0.101	1	2
Erbb3	0.752397	-0.22887	0.01	0.012	1	2
Ppp1r2	0.264945	-0.228784	0.262	0.282	1	2
Csrp1	0.217399	-0.228648	0.224	0.248	1	2
Cpsf7	0.0603567	-0.228379	0.189	0.228	1	2
Gmpr2	0.419935	-0.228238	0.049	0.058	1	2
Fam114a2	0.209211	-0.22807	0.169	0.19	1	2
Zfp953	0.567182	-0.228067	0.028	0.023	1	2
Nkap	0.224192	-0.228	0.154	0.177	1	2
Krit1	0.15901	-0.227971	0.356	0.389	1	2
Pstpip1	0.208913	-0.227548	0.239	0.266	1	2
Gtf2a1l	0.755744	-0.227342	0.023	0.026	1	2
Brwd3	0.51093	-0.227278	0.109	0.12	1	2
Zfp444	0.452474	-0.227271	0.056	0.065	1	2
Vps51	0.2109	-0.22726	0.092	0.111	1	2
Ric8a	0.64581	-0.227058	0.151	0.158	1	2
[truncated: 5,019 more rows]

## Sheet: WT naïve vs WT ECTV clu4 mDCs
	p_val	avg_log2FC	pct.1	pct.2	p_val_adj	cluster		high in naïve WT (-)	high in WT ECTV 1 dpi (+)
Sct	0.0622674	-5.94823	0	0.01	1	4
Foxm1	0.0409823	-4.83861	0	0.012	1	4
Xcr1	0.0271825	-4.62131	0	0.014	1	4
Slc4a5	0.22405	-4.6133	0.003	0.01	1	4
Krt20	0.00115718	-4.56454	0	0.029	1	4
ENSMUSG00000079222	0.0622674	-4.52854	0	0.01	1	4
Amn	0.0622674	-4.45179	0	0.01	1	4
Ropn1l	0.0622674	-4.39702	0	0.01	1	4
Cdo1	0.0622674	-4.29672	0	0.01	1	4
Cntd1	0.0622674	-4.27658	0	0.01	1	4
Gbgt1	0.0622674	-4.11906	0	0.01	1	4
Epas1	0.0452547	-4.07526	0.003	0.018	1	4
Piezo2	0.0271825	-4.06484	0	0.014	1	4
Pgbd1	0.149561	-4.04762	0.003	0.012	1	4
Zfp13	0.0409823	-4.03433	0	0.012	1	4
Fahd1	0.0404171	-4.02647	0.006	0.023	1	4
Grhl3	0.0271825	-4.01352	0	0.014	1	4
Cpne5	0.0622674	-3.98454	0	0.01	1	4
Fndc1	0.0622674	-3.977	0	0.01	1	4
Lrrc73	0.0409823	-3.96752	0	0.012	1	4
Slco2b1	0.0271825	-3.95186	0	0.014	1	4
Tpm3-rs7	0.0409823	-3.94894	0	0.012	1	4
Pi16	0.100296	-3.89602	0.003	0.014	1	4
Zfp607b	0.0181332	-3.88697	0	0.016	1	4
ENSMUSG00000079800	1.03939e-05	-3.86667	0.008	0.072	0.17202	4
Nkx1-2	0.0409823	-3.83627	0	0.012	1	4
Pcdhgb5	0.224784	-3.79761	0.003	0.01	1	4
Colgalt2	0.0304062	-3.69943	0.003	0.02	1	4
Slc1a1	0.0996074	-3.66905	0.003	0.014	1	4
Timm8a2	0.0999511	-3.66419	0.003	0.014	1	4
Zfp418	0.0409823	-3.66281	0	0.012	1	4
Asphd1	0.249353	-3.63728	0.006	0.014	1	4
Dnaaf2	0.149058	-3.63379	0.003	0.012	1	4
Mybl2	0.632137	-3.62871	0.008	0.012	1	4
Dnah5	0.0622674	-3.60442	0	0.01	1	4
Lefty1	0.0670375	-3.6024	0.003	0.016	1	4
Ly6i	0.0999511	-3.58656	0.003	0.014	1	4
Mypn	0.0622674	-3.58237	0	0.01	1	4
Shcbp1l	0.0409823	-3.55445	0	0.012	1	4
Minar1	0.0622674	-3.54565	0	0.01	1	4
Cenpi	0.0622674	-3.54478	0	0.01	1	4
Armc2	0.226998	-3.51371	0.003	0.01	1	4
Rhox8	0.0622674	-3.50232	0	0.01	1	4
Mrm2	0.00653156	-3.48726	0.003	0.027	1	4
Plppr1	0.0134341	-3.46713	0.006	0.029	1	4
Speg	0.066803	-3.46028	0.003	0.016	1	4
Wwtr1	0.0140537	-3.43324	0.003	0.023	1	4
Zmynd12	0.224784	-3.42271	0.003	0.01	1	4
Mecom	0.119918	-3.41333	0.006	0.018	1	4
Gm21762	0.0672727	-3.38903	0.003	0.016	1	4
Spats1	0.150066	-3.37659	0.003	0.012	1	4
Sh2d4b	0.352908	-3.3723	0.006	0.012	1	4
Isg20	0.133586	-3.35057	0.017	0.033	1	4
Selenon	0.0478396	-3.29343	0.008	0.027	1	4
Uaca	0.0142605	-3.2909	0.003	0.023	1	4
Pcyox1l	0.0331157	-3.26318	0.008	0.029	1	4
Gm10406	0.00648336	-3.23289	0.003	0.027	1	4
Samd11	0.0999511	-3.22509	0.003	0.014	1	4
Spink10	0.0459012	-3.22144	0.003	0.018	1	4
H2bc26-ps	0.499637	-3.20536	0.006	0.01	1	4
Cd207	0.0229656	-3.18874	0.008	0.031	1	4
Gpr55	0.100988	-3.18828	0.003	0.014	1	4
Ccdc96	0.0111774	-3.18607	0.014	0.045	1	4
Sirpd	0.247417	-3.16354	0.006	0.014	1	4
Slc39a4	0.0452547	-3.15343	0.003	0.018	1	4
Zfpm2	0.253131	-3.11079	0.008	0.018	1	4
Gm20661	0.224784	-3.1005	0.003	0.01	1	4
Olig1	0.136188	-3.08874	0.011	0.025	1	4
Exoc3l2	0.251433	-3.08632	0.008	0.018	1	4
3830403N18Rik	0.0271825	-3.08557	0	0.014	1	4
Cttn	0.0409823	-3.06784	0	0.012	1	4
Zfp239	0.0622674	-3.0635	0	0.01	1	4
Proser2	0.352908	-3.05722	0.006	0.012	1	4
Cldn12	0.0409823	-3.03921	0	0.012	1	4
Slamf9	0.22405	-2.99793	0.003	0.01	1	4
Perp	0.0409823	-2.99082	0	0.012	1	4
Prc1	0.0677451	-2.97855	0.003	0.016	1	4
Gm3264	0.066803	-2.96602	0.003	0.016	1	4
Tnfsf13b	0.13136	-2.96366	0.008	0.022	1	4
4933427D14Rik	0.224784	-2.95264	0.003	0.01	1	4
Npr1	0.0271825	-2.93559	0	0.014	1	4
Akap1	0.187473	-2.92651	0.011	0.023	1	4
Mrc1	0.149561	-2.92041	0.003	0.012	1	4
Tceal1	0.0579916	-2.9118	0.006	0.022	1	4
Mastl	0.247417	-2.89698	0.006	0.014	1	4
Atp2b2	0.0181332	-2.89225	0	0.016	1	4
Lgi4	0.253699	-2.88882	0.008	0.018	1	4
Pdzd2	0.50418	-2.85319	0.006	0.01	1	4
Gm17359	0.150066	-2.85121	0.003	0.012	1	4
Ndor1.1	0.121969	-2.83057	0.006	0.018	1	4
Eri2	0.0285819	-2.81357	0.006	0.025	1	4
C1qb	0.0409823	-2.79283	0	0.012	1	4
Plekhh1	0.150066	-2.77632	0.003	0.012	1	4
Prph	0.224181	-2.76315	0.02	0.033	1	4
Ccdc120	0.0271825	-2.75927	0	0.014	1	4
Armc6	0.767845	-2.75628	0.014	0.012	1	4
Kndc1	0.225521	-2.73607	0.003	0.01	1	4
Lrrc56	0.00451762	-2.73034	0.003	0.029	1	4
Tcim	0.00821323	-2.72797	0.008	0.037	1	4
Cttnbp2	0.742377	-2.72525	0.011	0.014	1	4
Ephb2	0.392438	-2.72005	0.017	0.025	1	4
Gcnt7	0.0297473	-2.71189	0.014	0.039	1	4
Pram1	0.0952414	-2.70212	0.008	0.023	1	4
Defb42	0.0114428	-2.69954	0.008	0.035	1	4
Fbxo44	0.677432	-2.69417	0.014	0.018	1	4
Tlnrd1	0.158186	-2.66572	0.025	0.043	1	4
Cfap74	0.475372	-2.66289	0.008	0.014	1	4
Nup210l	0.0182972	-2.61709	0.025	0.059	1	4
Bub1b	0.13136	-2.6159	0.008	0.022	1	4
Hacd4	0.0999511	-2.60778	0.003	0.014	1	4
Knstrn	0.12094	-2.60633	0.006	0.018	1	4
Mki67	0.454609	-2.60469	0.028	0.037	1	4
Gm49405	0.000983469	-2.60342	0.003	0.037	1	4
Fpgs	0.359718	-2.60277	0.02	0.029	1	4
ENSMUSG00000079808	0.636626	-2.57661	0.008	0.012	1	4
Slc16a14	0.174457	-2.56498	0.006	0.016	1	4
Stard6	0.0409823	-2.5642	0	0.012	1	4
Tsacc	0.0398795	-2.56163	0.014	0.037	1	4
Serpinb1b	0.0309567	-2.5537	0.003	0.02	1	4
Spata31d1b	0.0751219	-2.5391	0.02	0.041	1	4
Tnc	0.0107802	-2.52833	0.014	0.045	1	4
Tgfbi	0.186001	-2.52287	0.008	0.02	1	4
Hunk	0.671881	-2.51893	0.014	0.018	1	4
Gm28305	0.0675086	-2.51813	0.003	0.016	1	4
Fosl1	0.100296	-2.518	0.003	0.014	1	4
Klf5	0.244602	-2.51739	0.014	0.025	1	4
Serpind1	0.05834	-2.51666	0.006	0.022	1	4
Ninl	0.0279652	-2.50472	0.006	0.025	1	4
Kcnj2	0.0198883	-2.49582	0.006	0.027	1	4
Asap3	0.224784	-2.48878	0.003	0.01	1	4
Ngfr	0.50077	-2.48766	0.006	0.01	1	4
Fam83d	0.248706	-2.47369	0.006	0.014	1	4
Lrp11	0.50418	-2.47153	0.006	0.01	1	4
Slc12a3	0.013982	-2.45779	0.011	0.039	1	4
Dlgap3	0.0166326	-2.45042	0.008	0.033	1	4
Ifit2	0.0312128	-2.44698	0.017	0.043	1	4
Gm12258	0.132986	-2.44628	0.008	0.022	1	4
Car7	0.0486229	-2.42861	0.008	0.027	1	4
Bbs1	0.0622674	-2.42772	0	0.01	1	4
Kcna2	0.0848185	-2.41567	0.006	0.02	1	4
Slc35e3	0.185336	-2.4148	0.014	0.027	1	4
Marveld2	0.495794	-2.40948	0.017	0.023	1	4
Med18	0.187755	-2.4022	0.008	0.02	1	4
Fgfbp3	0.0983885	-2.38949	0.011	0.027	1	4
Mfsd2a	0.249353	-2.38647	0.006	0.014	1	4
Acot11	0.0196304	-2.37937	0.011	0.037	1	4
Gm21972	0.488739	-2.37451	0.017	0.023	1	4
D630045J12Rik	0.224784	-2.36821	0.003	0.01	1	4
A430033K04Rik	0.0121915	-2.36757	0.017	0.049	1	4
Sirpb1c	0.224784	-2.36717	0.003	0.01	1	4
Thsd1	0.101335	-2.36138	0.003	0.014	1	4
Arfgef3	0.41763	-2.36113	0.014	0.022	1	4
Tmod1	0.226258	-2.35137	0.003	0.01	1	4
Reep1	0.63438	-2.34819	0.008	0.012	1	4
Gjc1	0.632137	-2.34688	0.008	0.012	1	4
Plcd1	0.503042	-2.34356	0.006	0.01	1	4
Ttc12	0.0407897	-2.34268	0.006	0.023	1	4
Xlr4c	0.023764	-2.338	0.008	0.031	1	4
Ccdc18	0.189466	-2.33797	0.011	0.023	1	4
Spag4	0.50646	-2.33603	0.006	0.01	1	4
Wdr19	0.253131	-2.3302	0.008	0.018	1	4
Lgr4	0.172342	-2.32514	0.02	0.035	1	4
Slc35c1	0.00859003	-2.31748	0.008	0.037	1	4
Cdkn1c	0.134298	-2.31142	0.008	0.022	1	4
F2	0.149058	-2.30462	0.003	0.012	1	4
Cdkn2a	0.0246552	-2.30181	0.02	0.049	1	4
Slc22a22	0.353218	-2.29145	0.008	0.016	1	4
Gm6377	0.0417967	-2.28275	0.014	0.037	1	4
Slc22a5	0.0199948	-2.28207	0.025	0.059	1	4
Gm3095	0.0622674	-2.27057	0	0.01	1	4
9030025P20Rik	0.183892	-2.26981	0.014	0.027	1	4
Fbxo31	0.00382649	-2.26368	0.02	0.061	1	4
Rit1	0.000197901	-2.25478	0.04	0.108	1	4
Fam83h	0.225521	-2.2528	0.003	0.01	1	4
Setmar	0.224784	-2.25012	0.003	0.01	1	4
Clspn	0.944585	-2.24634	0.011	0.012	1	4
Cgnl1	0.0459012	-2.23149	0.003	0.018	1	4
Camsap3	0.383619	-2.22829	0.011	0.006	1	4
Adm2	0.0454156	-2.22549	0.003	0.018	1	4
Gale	0.338096	-2.21021	0.011	0.02	1	4
Cyp4f18	0.133969	-2.20652	0.008	0.022	1	4
Chst2	0.0158374	-2.20592	0.014	0.043	1	4
Tmem232	0.224784	-2.20314	0.003	0.01	1	4
Hpgd	0.132333	-2.20175	0.008	0.022	1	4
Rab34	0.368299	-2.19353	0.02	0.029	1	4
Egr3	0.368299	-2.19069	0.02	0.029	1	4
Senp8	0.0686224	-2.18772	0.008	0.025	1	4
Cfap77	0.123351	-2.18268	0.006	0.018	1	4
Cib3	0.0409823	-2.16694	0	0.012	1	4
Cav2	0.0135644	-2.1632	0.006	0.029	1	4
Magi2	0.0374934	-2.16051	0.04	0.072	1	4
Csf3r	0.745614	-2.16033	0.011	0.014	1	4
Alkbh4	0.535675	-2.15417	0.014	0.02	1	4
Rims3	0.2513	-2.14813	0.006	0.014	1	4
Ctxnd1	0.00574712	-2.14426	0.008	0.039	1	4
Gnmt	0.938638	-2.14264	0.011	0.012	1	4
Ntrk3	0.247417	-2.13792	0.006	0.014	1	4
Ifitm3	0.0236977	-2.13421	0.037	0.072	1	4
Shc4	0.100988	-2.1334	0.003	0.014	1	4
Nkd2	0.150572	-2.13294	0.003	0.012	1	4
1700008O03Rik	0.151079	-2.13145	0.003	0.012	1	4
Slc35e4	0.0486229	-2.12898	0.008	0.027	1	4
Rpp38	0.44306	-2.12707	0.023	0.031	1	4
Stbd1	0.475372	-2.12614	0.008	0.014	1	4
Snx24	0.218103	-2.12067	0.023	0.037	1	4
Lbx2	0.499637	-2.11711	0.006	0.01	1	4
Cenpe	0.835949	-2.112	0.011	0.01	1	4
Trmt12	0.349533	-2.11184	0.008	0.016	1	4
Per3	0.000513888	-2.11101	0.034	0.094	1	4
Zfp446	0.2513	-2.10714	0.006	0.014	1	4
Cldn1	0.0425752	-2.10454	0.02	0.045	1	4
Bace2	0.499637	-2.09327	0.006	0.01	1	4
Rac3	0.348066	-2.08576	0.008	0.016	1	4
Kdm8	0.35551	-2.08269	0.006	0.012	1	4
Lonrf1	0.0329187	-2.07875	0.025	0.055	1	4
Cmtm8	0.352479	-2.07851	0.008	0.016	1	4
Pacrg	0.22405	-2.07407	0.003	0.01	1	4
Oas2	0.151079	-2.07371	0.003	0.012	1	4
Unc13b	0.480007	-2.06061	0.008	0.014	1	4
Zfp955a	0.224923	-2.05966	0.02	0.033	1	4
Egfl6	0.123699	-2.05776	0.006	0.018	1	4
Tle6	0.225521	-2.05217	0.003	0.01	1	4
Popdc2	0.149058	-2.0511	0.003	0.012	1	4
Fshr	0.35551	-2.04487	0.006	0.012	1	4
C3	0.248706	-2.0408	0.006	0.014	1	4
Cxcl9	0.133969	-2.03935	0.008	0.022	1	4
Mrm1	0.253713	-2.03806	0.025	0.039	1	4
Rhebl1	0.185336	-2.03517	0.014	0.027	1	4
Spata2l	0.641127	-2.02829	0.008	0.012	1	4
Tmeff1	0.473239	-2.02337	0.025	0.033	1	4
Krt83	0.0996074	-2.02221	0.003	0.014	1	4
Nudt1	0.000268499	-2.01928	0.028	0.09	1	4
Fam171a1	0.0211462	-2.01135	0.003	0.022	1	4
Ryk	0.244148	-2.00798	0.014	0.025	1	4
Pla2g6	0.615338	-2.00042	0.017	0.022	1	4
H4c14	0.00178039	-1.99878	0.017	0.061	1	4
Fan1	0.140939	-1.99802	0.017	0.033	1	4
Erich5	0.0421807	-1.99412	0.006	0.023	1	4
Dynlt5	0.226258	-1.99013	0.003	0.01	1	4
Chil1	0.224784	-1.98982	0.003	0.01	1	4
Anxa13	0.175884	-1.98372	0.006	0.016	1	4
Ptpdc1	0.136177	-1.9811	0.017	0.033	1	4
Rgs14	0.343869	-1.97035	0.031	0.043	1	4
Tead2	0.0278291	-1.97009	0.011	0.035	1	4
Ctnna3	0.393646	-1.96561	0.017	0.025	1	4
Mcts2	0.138319	-1.96472	0.011	0.025	1	4
Dnah17	0.0684589	-1.96436	0.003	0.016	1	4
Zfp235	0.769138	-1.96233	0.017	0.02	1	4
Gm10135	0.0622674	-1.9559	0	0.01	1	4
Rilpl1	0.24917	-1.95047	0.014	0.025	1	4
Arhgap8	0.188667	-1.94478	0.011	0.023	1	4
Tnfrsf23	0.13987	-1.94437	0.017	0.033	1	4
E2f1	0.352479	-1.94326	0.008	0.016	1	4
Ampd1	0.386546	-1.94114	0.011	0.006	1	4
Nckap5	0.222701	-1.93285	0.02	0.033	1	4
Mob3c	0.14877	-1.93282	0.031	0.051	1	4
Stxbp1	0.00102248	-1.93125	0.065	0.133	1	4
Gipc2	0.635502	-1.92435	0.008	0.012	1	4
Pheta2	0.0622674	-1.92273	0	0.01	1	4
Pou3f1	0.391835	-1.91752	0.017	0.025	1	4
A130010J15Rik	0.251157	-1.90987	0.011	0.022	1	4
Dctd	0.641127	-1.90942	0.008	0.012	1	4
Zfp612	0.581471	-1.90498	0.011	0.016	1	4
Ly6d	0.0608603	-1.89793	0.045	0.076	1	4
Zfyve28	0.498631	-1.89593	0.017	0.023	1	4
Dram2	0.000421918	-1.89569	0.048	0.115	1	4
Gatc	0.183393	-1.89504	0.008	0.02	1	4
2810021J22Rik	0.173038	-1.89398	0.006	0.016	1	4
Or12d17	0.134298	-1.89037	0.008	0.022	1	4
Dhrs9	0.191474	-1.89013	0.011	0.023	1	4
Fam217b	0.0858107	-1.88504	0.006	0.02	1	4
Hhat	0.340015	-1.88242	0.011	0.02	1	4
Cpt1c	0.0173699	-1.88241	0.008	0.033	1	4
Cplx2	0.836667	-1.87951	0.008	0.01	1	4
Stxbp5l	0.184693	-1.87733	0.008	0.02	1	4
Hs1bp3	0.0577152	-1.87392	0.014	0.035	1	4
Gm8797	0.139072	-1.87281	0.017	0.033	1	4
Myo19	0.0459012	-1.86744	0.003	0.018	1	4
B3gnt8	0.176361	-1.8671	0.006	0.016	1	4
Cstad	0.45134	-1.86669	0.011	0.018	1	4
Patl2	0.207851	-1.8662	0.025	0.041	1	4
Fastkd1	0.243308	-1.86574	0.028	0.043	1	4
Zfp3	0.291565	-1.8635	0.02	0.031	1	4
Frs3	0.248706	-1.86232	0.006	0.014	1	4
Crtap	0.535123	-1.85912	0.023	0.029	1	4
Scn4b	0.0141342	-1.85747	0.011	0.039	1	4
Kcnh4	0.0177421	-1.85644	0.02	0.051	1	4
Zc3h8	0.076013	-1.85483	0.02	0.041	1	4
Vps25	0.252604	-1.85296	0.006	0.014	1	4
Naa80	0.0169241	-1.85284	0.008	0.033	1	4
Grik2	0.149561	-1.85058	0.003	0.012	1	4
Ifi205	0.0850657	-1.84868	0.006	0.02	1	4
Hid1	0.0588658	-1.84738	0.006	0.022	1	4
Pald1	0.0541188	-1.84562	0.011	0.031	1	4
Pamr1	0.837179	-1.84503	0.011	0.01	1	4
Rims2	0.84383	-1.84388	0.014	0.016	1	4
Kcnk10	0.447678	-1.84227	0.028	0.037	1	4
Fuom	0.00427918	-1.83669	0.037	0.084	1	4
Ifit1bl1	0.951726	-1.83255	0.011	0.012	1	4
Echdc3	0.338096	-1.8296	0.011	0.02	1	4
Gas8	0.298976	-1.82713	0.028	0.041	1	4
Plekhh3	0.505319	-1.82681	0.006	0.01	1	4
Cdk5	0.266255	-1.8268	0.056	0.074	1	4
Dennd2a	0.832261	-1.8252	0.011	0.01	1	4
Zfp747	0.841887	-1.82475	0.008	0.01	1	4
Dok5	0.0853135	-1.82429	0.006	0.02	1	4
Wnt6	0.104012	-1.82108	0.014	0.031	1	4
Glrp1	0.224784	-1.82092	0.003	0.01	1	4
Mad2l2	0.161631	-1.82018	0.028	0.047	1	4
Kctd5	0.318142	-1.81944	0.048	0.063	1	4
Pcx	0.245056	-1.81834	0.014	0.025	1	4
P4htm	0.139072	-1.81814	0.017	0.033	1	4
Creb3l2	0.102611	-1.81128	0.023	0.043	1	4
Gm29394	0.355441	-1.81032	0.008	0.016	1	4
Itgb8	0.00150775	-1.80802	0.048	0.108	1	4
Myo18b	0.351004	-1.80543	0.008	0.016	1	4
Rusc1	0.0043481	-1.80071	0.059	0.114	1	4
Kcnab1	0.641127	-1.79984	0.008	0.012	1	4
Rflnb	0.310722	-1.79829	0.017	0.027	1	4
Gpr162	0.760995	-1.78888	0.017	0.02	1	4
Zfp383	0.226258	-1.78818	0.003	0.01	1	4
Gm21985	0.633258	-1.7855	0.008	0.012	1	4
Mocos	0.33682	-1.78196	0.011	0.02	1	4
Rdh12	0.0679824	-1.7813	0.003	0.016	1	4
Cenpj	0.0176518	-1.77505	0.042	0.082	1	4
Tmem9	0.00920443	-1.77249	0.017	0.051	1	4
Oas1b	0.633258	-1.77177	0.008	0.012	1	4
Slc22a18	0.049684	-1.771	0.008	0.027	1	4
Akap17b	0.997245	-1.77084	0.02	0.02	1	4
Sec22c	0.140786	-1.76886	0.011	0.025	1	4
Ociad2	0.568422	-1.7674	0.02	0.025	1	4
Zfp46	0.13691	-1.76488	0.037	0.059	1	4
Kif24	0.327847	-1.76127	0.014	0.023	1	4
Aif1l	0.0284045	-1.75912	0.006	0.025	1	4
H1f10	0.0096801	-1.75503	0.02	0.055	1	4
Calm4	0.00313323	-1.7519	0.023	0.067	1	4
Thbs4	0.499637	-1.74951	0.006	0.01	1	4
Foxs1	0.186439	-1.74705	0.008	0.02	1	4
Smg9	0.127889	-1.74532	0.065	0.092	1	4
Inafm2	0.0325086	-1.74429	0.017	0.043	1	4
F830045P16Rik	0.225521	-1.74	0.003	0.01	1	4
Wdcp	0.388123	-1.73983	0.034	0.045	1	4
Nudt2	0.0686839	-1.73793	0.031	0.057	1	4
Gng5c	0.477223	-1.73538	0.008	0.014	1	4
Tirap	0.340656	-1.73104	0.011	0.02	1	4
Adat2	0.564105	-1.73015	0.02	0.025	1	4
Faap24	0.0492838	-1.72867	0.008	0.027	1	4
Cxcl12	0.150572	-1.72734	0.003	0.012	1	4
Dffa	0.23397	-1.72372	0.02	0.033	1	4
Blzf1	0.00824888	-1.72287	0.034	0.076	1	4
Taf9	0.834061	-1.72104	0.008	0.01	1	4
Sqor	0.258849	-1.71728	0.008	0.018	1	4
Lrrc51	0.351741	-1.71553	0.008	0.016	1	4
Noxo1	0.0545183	-1.70959	0.011	0.031	1	4
4931414P19Rik	0.0150785	-1.70937	0.011	0.039	1	4
Fastkd3	0.428737	-1.70829	0.023	0.031	1	4
Npcd	0.354641	-1.70723	0.006	0.012	1	4
Car13	0.166189	-1.70667	0.025	0.043	1	4
Scrn3	0.00580377	-1.70208	0.014	0.049	1	4
Card19	5.77897e-05	-1.69761	0.056	0.141	0.956419	4
Gm49339	0.50418	-1.69625	0.006	0.01	1	4
Gm3752	0.745614	-1.68899	0.011	0.014	1	4
Rpp40	0.327847	-1.68842	0.014	0.023	1	4
Pidd1	0.50646	-1.68513	0.006	0.01	1	4
Zfp248	0.583345	-1.67837	0.011	0.016	1	4
Klrg1	0.253131	-1.67064	0.008	0.018	1	4
Mtmr9	0.0178268	-1.66988	0.04	0.078	1	4
Spata5l1	0.194573	-1.66758	0.04	0.059	1	4
Sbk1	0.659462	-1.66489	0.02	0.016	1	4
Fam227a	0.762184	-1.66209	0.023	0.025	1	4
Cpt1a	0.395194	-1.66185	0.065	0.078	1	4
Lyrm7	0.503042	-1.66117	0.006	0.01	1	4
Ifitm6	0.224784	-1.66013	0.003	0.01	1	4
Foxo4	0.370464	-1.65692	0.02	0.029	1	4
Galnt4	0.944585	-1.65688	0.011	0.012	1	4
Itgam	0.103131	-1.65484	0.014	0.031	1	4
Slc2a8	0.103743	-1.65171	0.011	0.027	1	4
Zscan25	0.551264	-1.64793	0.034	0.041	1	4
Nphs1	0.0452275	-1.64781	0.02	0.045	1	4
Ssx2ip	0.397891	-1.64576	0.017	0.025	1	4
Pradc1	0.00559032	-1.64493	0.014	0.049	1	4
Tlcd2	0.250046	-1.64236	0.051	0.068	1	4
Ccdc30	0.100988	-1.64115	0.003	0.014	1	4
Ryr1	0.49371	-1.63811	0.02	0.014	1	4
Parp16	0.77567	-1.63739	0.023	0.025	1	4
Ppp1r1c	0.39063	-1.6373	0.017	0.025	1	4
Gm8773	0.139604	-1.63649	0.017	0.033	1	4
Prrg2	0.0414506	-1.63314	0.04	0.072	1	4
Pygm	0.0795093	-1.63276	0.02	0.041	1	4
Tnfsf15	0.226998	-1.6296	0.003	0.01	1	4
Ltb4r1	0.767845	-1.62765	0.014	0.012	1	4
Gpam	0.970031	-1.62669	0.014	0.014	1	4
Zbp1	0.0488387	-1.62651	0.065	0.102	1	4
Fcrla	0.0292102	-1.62543	0.006	0.025	1	4
Lysmd1	0.252604	-1.62524	0.006	0.014	1	4
Tspear	0.505319	-1.62473	0.006	0.01	1	4
2610044O15Rik8	0.0543849	-1.62237	0.011	0.031	1	4
Lhx2	0.837972	-1.62018	0.008	0.01	1	4
Gm20422	0.250001	-1.61843	0.006	0.014	1	4
Tpra1	0.347281	-1.61832	0.031	0.043	1	4
Srp54b	0.101335	-1.6176	0.003	0.014	1	4
Zfp2	0.352908	-1.61551	0.006	0.012	1	4
Pgap4	0.479078	-1.61102	0.008	0.014	1	4
Slc9a5	0.0530652	-1.60861	0.011	0.031	1	4
Mrpl47	0.42534	-1.60669	0.023	0.031	1	4
Btbd2	0.051619	-1.60577	0.034	0.063	1	4
Cfap58	0.22405	-1.60422	0.003	0.01	1	4
Spdl1	0.112121	-1.60384	0.034	0.057	1	4
Gnb5	0.102693	-1.5977	0.014	0.031	1	4
Psd	0.931232	-1.59682	0.017	0.018	1	4
Slc16a9	0.246878	-1.59509	0.014	0.025	1	4
Fbxo6	0.0279229	-1.59151	0.028	0.061	1	4
Agbl3	0.0413102	-1.59101	0.014	0.037	1	4
Cachd1	0.151079	-1.58788	0.003	0.012	1	4
Efcab11	0.464242	-1.58667	0.02	0.027	1	4
Smagp	0.0765516	-1.58613	0.031	0.057	1	4
Col23a1	0.445053	-1.5848	0.011	0.018	1	4
Spryd7	0.657701	-1.58428	0.034	0.039	1	4
Eif2b1	0.574647	-1.58074	0.051	0.059	1	4
Scg5	0.633258	-1.58009	0.008	0.012	1	4
Erbb3	0.943396	-1.57948	0.011	0.012	1	4
Arhgap23	0.296132	-1.57809	0.02	0.031	1	4
Ficd	0.588042	-1.57696	0.011	0.016	1	4
Dlgap1	0.00998026	-1.57513	0.02	0.055	1	4
4931408C20Rik	0.93874	-1.57352	0.023	0.022	1	4
Maob	0.50418	-1.57127	0.006	0.01	1	4
Tgfb2	0.0428433	-1.56968	0.02	0.045	1	4
Rnaset2a	0.0169028	-1.56685	0.045	0.086	1	4
Fcmr	0.175884	-1.56243	0.006	0.016	1	4
Nfe2	0.150572	-1.56127	0.003	0.012	1	4
Pcgf2	0.56445	-1.56076	0.014	0.01	1	4
Otud3	0.181232	-1.55857	0.031	0.049	1	4
Il12rb1	0.507602	-1.5563	0.006	0.01	1	4
Gm6710	0.248706	-1.55568	0.006	0.014	1	4
Vwce	0.150572	-1.55517	0.003	0.012	1	4
Xlr	0.000122462	-1.5533	0.034	0.104	1	4
Icam4	0.224784	-1.55235	0.003	0.01	1	4
Tnfrsf14	0.343229	-1.54903	0.011	0.02	1	4
Lrrc8a	0.00849938	-1.54798	0.014	0.047	1	4
Mrpl37	0.172297	-1.54795	0.045	0.067	1	4
Tbx2	0.501906	-1.54575	0.006	0.01	1	4
Isg15	0.239375	-1.54181	0.071	0.092	1	4
Brca1	0.0642487	-1.53926	0.04	0.068	1	4
Pja1	0.157186	-1.53865	0.056	0.08	1	4
Pira2	0.353218	-1.53659	0.008	0.016	1	4
Cd46	0.331159	-1.53393	0.025	0.037	1	4
Qpct	0.256762	-1.5336	0.011	0.022	1	4
Lnx1	0.100988	-1.53173	0.003	0.014	1	4
Col20a1	0.0599291	-1.5313	0.006	0.022	1	4
Naa40	0.292116	-1.52938	0.082	0.061	1	4
Tmem41a	0.358997	-1.52899	0.006	0.012	1	4
Egf	0.298673	-1.52861	0.04	0.055	1	4
Usp2	0.0797071	-1.52833	0.017	0.037	1	4
Trp53rkb	0.226787	-1.52753	0.02	0.033	1	4
Vars2	0.785039	-1.5261	0.028	0.031	1	4
Rell2	0.837972	-1.52573	0.008	0.01	1	4
Gm3435	0.708675	-1.52521	0.017	0.014	1	4
Coprs	0.832083	-1.52456	0.028	0.025	1	4
Bhlhe41	0.843193	-1.51805	0.008	0.01	1	4
Fgf1	0.138013	-1.51466	0.011	0.025	1	4
Tesk2	0.127421	-1.51133	0.048	0.072	1	4
Mvd	0.104444	-1.50886	0.04	0.065	1	4
Gm14296	0.948155	-1.50809	0.011	0.012	1	4
BC147527	0.646475	-1.50428	0.031	0.025	1	4
Efemp2	0.224784	-1.50323	0.003	0.01	1	4
Zfp821	0.370574	-1.50305	0.028	0.039	1	4
Eef1akmt4	0.832261	-1.50269	0.011	0.01	1	4
Fyb2	0.124047	-1.50256	0.006	0.018	1	4
Dus2	0.0422482	-1.50149	0.037	0.068	1	4
5730409E04Rik	0.341298	-1.50098	0.011	0.02	1	4
Car11	0.63775	-1.50043	0.008	0.012	1	4
Klhl17	0.2513	-1.49914	0.006	0.014	1	4
Bud13	0.458522	-1.49403	0.042	0.053	1	4
Mgll	0.0407157	-1.49141	0.037	0.068	1	4
Srf	0.9002	-1.48772	0.028	0.029	1	4
Rab7b	0.358123	-1.4876	0.006	0.012	1	4
Cbr3	0.185129	-1.48628	0.008	0.02	1	4
Ndrg4	0.13562	-1.48219	0.008	0.022	1	4
Soat2	0.184693	-1.48044	0.008	0.02	1	4
L3mbtl2	0.438202	-1.48008	0.037	0.047	1	4
Edil3	0.203298	-1.47922	0.028	0.045	1	4
Slc25a22	0.261161	-1.47912	0.008	0.018	1	4
Rhod	0.708675	-1.47851	0.017	0.014	1	4
Dhx33	0.593582	-1.47466	0.048	0.055	1	4
Mss51	0.0762135	-1.474	0.011	0.029	1	4
Apol8	0.948155	-1.4738	0.011	0.012	1	4
Usp50	0.290657	-1.47299	0.02	0.031	1	4
Cntn3	0.503042	-1.47176	0.006	0.01	1	4
Bnip3	0.300109	-1.47108	0.037	0.051	1	4
Dcaf12l1	0.151079	-1.46826	0.003	0.012	1	4
Gamt	0.50646	-1.46694	0.006	0.01	1	4
Utp14b	0.0758699	-1.46693	0.023	0.045	1	4
Nadk2	0.382484	-1.46692	0.062	0.076	1	4
Rpap3	0.622106	-1.46585	0.042	0.049	1	4
Il10rb	0.442482	-1.46503	0.023	0.031	1	4
Dna2	0.0353666	-1.46475	0.023	0.051	1	4
Pcdh7	0.00667118	-1.46455	0.09	0.149	1	4
Tgm2	0.190267	-1.4639	0.011	0.023	1	4
Erf	0.580741	-1.45853	0.02	0.025	1	4
Sgcz	0.041248	-1.45798	0.04	0.072	1	4
Zfp442	0.676505	-1.45791	0.014	0.018	1	4
Spryd4	0.253131	-1.45741	0.008	0.018	1	4
Lypd6b	0.448977	-1.45436	0.011	0.018	1	4
H2bc9	0.321626	-1.45433	0.014	0.023	1	4
Gm17949	0.45134	-1.4527	0.011	0.018	1	4
Creld1	0.449272	-1.45258	0.028	0.037	1	4
Trpm2	0.342585	-1.45053	0.011	0.02	1	4
Hepacam2	0.226258	-1.44881	0.003	0.01	1	4
Tgfb3	0.945775	-1.44724	0.011	0.012	1	4
Lrp5	0.00856716	-1.44489	0.025	0.065	1	4
Dnai4	0.135949	-1.44455	0.02	0.037	1	4
Adra1a	0.0174904	-1.43884	0.017	0.047	1	4
Bbs5	0.396068	-1.43685	0.017	0.025	1	4
Samd13	0.501906	-1.43265	0.006	0.01	1	4
Klhl42	0.620204	-1.42776	0.017	0.022	1	4
Zfp583	0.964586	-1.42422	0.014	0.014	1	4
Dthd1	0.108278	-1.42328	0.014	0.031	1	4
Coq8a	0.0342301	-1.42319	0.048	0.084	1	4
Rhoc	0.00616365	-1.41988	0.04	0.086	1	4
Rragc	0.00405951	-1.41881	0.11	0.174	1	4
Ttc41	0.226998	-1.41837	0.003	0.01	1	4
Hsd17b11	0.021889	-1.41798	0.088	0.135	1	4
Tex15	0.0972001	-1.41428	0.008	0.023	1	4
1190005I06Rik	0.225521	-1.41408	0.003	0.01	1	4
Zswim9	0.0595729	-1.41376	0.006	0.022	1	4
Sap30	0.0346048	-1.41205	0.048	0.084	1	4
Rgsl1	0.837179	-1.41183	0.011	0.01	1	4
Zbtb22	0.354186	-1.4047	0.023	0.033	1	4
Dhdds	0.140946	-1.40323	0.099	0.127	1	4
Tmem120a	0.355877	-1.40308	0.037	0.049	1	4
Fgd5	0.0941931	-1.40255	0.071	0.102	1	4
Polr2i	0.0166764	-1.40237	0.119	0.17	1	4
Zscan29	0.0891053	-1.39836	0.051	0.08	1	4
BC028528	0.0122275	-1.39505	0.014	0.045	1	4
Gpr85	0.178282	-1.39479	0.006	0.016	1	4
Chrng	0.475372	-1.39171	0.008	0.014	1	4
Lman1	0.024549	-1.39038	0.073	0.119	1	4
Slc36a1	0.187755	-1.38921	0.008	0.02	1	4
Fzd6	0.949345	-1.3876	0.011	0.012	1	4
St6galnac4	0.476642	-1.38731	0.04	0.049	1	4
Klhl3	0.249353	-1.38555	0.006	0.014	1	4
Natd1	0.402602	-1.38501	0.025	0.035	1	4
Pard6a	0.647371	-1.38335	0.048	0.055	1	4
Kbtbd7	0.239309	-1.38223	0.017	0.029	1	4
Dnajc17	0.0186396	-1.38023	0.034	0.07	1	4
Jcad	0.189866	-1.37863	0.011	0.023	1	4
Engase	0.642255	-1.37561	0.008	0.012	1	4
Mycbp	0.401493	-1.37421	0.054	0.067	1	4
Supt7l	0.0795093	-1.37362	0.02	0.041	1	4
Ttbk2	0.0487544	-1.37296	0.008	0.027	1	4
Ung	0.196572	-1.37268	0.031	0.049	1	4
Mks1	0.0567348	-1.37154	0.028	0.055	1	4
Oas3	0.342585	-1.37103	0.011	0.02	1	4
Matn2	0.450552	-1.37093	0.011	0.018	1	4
Fam184a	0.470674	-1.37068	0.034	0.043	1	4
Pgap3	0.1778	-1.37009	0.006	0.016	1	4
Fgd6	0.208798	-1.36817	0.025	0.041	1	4
Emilin2	0.458904	-1.36785	0.028	0.037	1	4
Esrra	0.002732	-1.36752	0.079	0.145	1	4
Cbx8	0.245511	-1.36563	0.014	0.025	1	4
Odad1	0.183393	-1.36529	0.008	0.02	1	4
Kpna2	0.497211	-1.36527	0.017	0.023	1	4
Zfp955b	0.0100507	-1.36429	0.02	0.055	1	4
Msh5	0.475372	-1.36306	0.008	0.014	1	4
Garin5a	0.315312	-1.36163	0.017	0.027	1	4
Zcchc14	0.309709	-1.35976	0.017	0.027	1	4
Eml1	0.50418	-1.35951	0.006	0.01	1	4
Napepld	0.582407	-1.3576	0.011	0.016	1	4
Ldhb	0.867042	-1.35682	0.04	0.041	1	4
Gins2	0.180581	-1.35448	0.02	0.035	1	4
Enho	0.151079	-1.35406	0.003	0.012	1	4
Ap5s1	0.733301	-1.35268	0.025	0.022	1	4
Dusp18	0.134628	-1.3513	0.008	0.022	1	4
Prkra	0.00587471	-1.34841	0.065	0.119	1	4
Tmem266	0.480007	-1.3483	0.008	0.014	1	4
Hoxa3	0.554028	-1.34798	0.028	0.035	1	4
Rpl9-ps6	0.00368215	-1.34673	0.056	0.114	1	4
Uchl1	0.354641	-1.34572	0.006	0.012	1	4
Zfp951	0.216994	-1.34568	0.042	0.061	1	4
Cacfd1	0.284063	-1.34559	0.04	0.055	1	4
Izumo1r	0.353958	-1.34423	0.008	0.016	1	4
Clec11a	0.226258	-1.3436	0.003	0.01	1	4
Hdac3	0.00865596	-1.34123	0.045	0.092	1	4
Ppif	0.216994	-1.33895	0.042	0.061	1	4
Wipi1	0.143353	-1.33677	0.014	0.029	1	4
Ttc6	0.638875	-1.33651	0.008	0.012	1	4
Rad1	0.498361	-1.33607	0.04	0.049	1	4
Tjp1	0.0082626	-1.33595	0.008	0.037	1	4
Dvl2	0.161139	-1.33391	0.028	0.047	1	4
Mlh3	0.307713	-1.33365	0.037	0.051	1	4
Cdk2ap1	0.0306656	-1.33331	0.085	0.129	1	4
Yae1d1	0.180491	-1.33181	0.059	0.082	1	4
Tram2	0.215085	-1.33079	0.034	0.051	1	4
Psmc3ip	0.593959	-1.32984	0.025	0.031	1	4
Nherf2	0.497921	-1.32649	0.017	0.023	1	4
4931406C07Rik	0.0554902	-1.32438	0.037	0.067	1	4
Zfp703	0.0215102	-1.32407	0.048	0.088	1	4
Bclaf3	0.546824	-1.32391	0.113	0.123	1	4
Rnf26	0.580534	-1.32057	0.011	0.016	1	4
Atf7ip2	0.0122053	-1.31959	0.031	0.07	1	4
Gfod2	0.629168	-1.31936	0.017	0.022	1	4
Nectin2	0.852061	-1.3189	0.014	0.016	1	4
Acot6	0.570527	-1.31754	0.014	0.01	1	4
Dclre1c	1.0274e-05	-1.31533	0.189	0.315	0.170035	4
Ccl5	4.47068e-05	-1.3142	0.449	0.528	0.739897	4
Fgf11	0.150572	-1.31361	0.003	0.012	1	4
Tmem267	0.996326	-1.31328	0.02	0.02	1	4
St6galnac2	0.0419956	-1.31231	0.034	0.065	1	4
Noc3l	0.206004	-1.309	0.056	0.078	1	4
Rundc1	0.66322	-1.30865	0.034	0.039	1	4
Qtrt1	0.0134051	-1.30853	0.045	0.088	1	4
Med31	0.1664	-1.30522	0.071	0.096	1	4
H1f0	0.0264144	-1.30478	0.082	0.127	1	4
Caml	0.177823	-1.30419	0.068	0.092	1	4
Zfyve9	0.0297543	-1.30316	0.045	0.082	1	4
Csf1	0.0303813	-1.30248	0.048	0.086	1	4
Fam222a	0.160648	-1.30246	0.028	0.047	1	4
Nat9	0.0031498	-1.30114	0.054	0.11	1	4
Myo16	0.359872	-1.30065	0.006	0.012	1	4
Igsf9	0.0215219	-1.30011	0.059	0.102	1	4
Pus7l	0.882721	-1.29926	0.017	0.016	1	4
Stox2	0.538096	-1.2989	0.014	0.02	1	4
Mtmr10	0.199877	-1.29831	0.04	0.059	1	4
Taf5l	0.375045	-1.29774	0.065	0.08	1	4
Siglech	0.30017	-1.29687	0.045	0.061	1	4
Tmem198b	0.831434	-1.29553	0.02	0.018	1	4
Lonrf3	0.17732	-1.29543	0.006	0.016	1	4
Pgpep1l	0.351741	-1.29453	0.008	0.016	1	4
Dsel	0.106465	-1.29293	0.014	0.031	1	4
Apoe	0.460628	-1.29122	0.082	0.096	1	4
Tnfsf14	0.103791	-1.28971	0.014	0.031	1	4
Mtrf1	0.932205	-1.28934	0.017	0.018	1	4
Pdlim7	0.602721	-1.28866	0.037	0.043	1	4
Slfn1	0.310215	-1.2877	0.017	0.027	1	4
Pde6h	0.341941	-1.28743	0.011	0.02	1	4
Adamts9	0.47815	-1.28421	0.008	0.014	1	4
Ranbp6	0.131374	-1.28415	0.025	0.045	1	4
Arfip1	0.314016	-1.27941	0.028	0.041	1	4
Dsn1	0.226787	-1.27809	0.02	0.033	1	4
Insl6	0.0011289	-1.27729	0.031	0.086	1	4
Mbd4	0.0122303	-1.27622	0.04	0.082	1	4
Trim69	0.963497	-1.27425	0.014	0.014	1	4
Clstn1	0.335176	-1.27278	0.048	0.063	1	4
Zfp653	0.705227	-1.27277	0.02	0.023	1	4
Mpp2	0.226998	-1.27246	0.003	0.01	1	4
Mfsd3	0.635502	-1.27129	0.008	0.012	1	4
Gtpbp3	0.0133582	-1.2644	0.02	0.053	1	4
Elmod3	0.837898	-1.26328	0.025	0.027	1	4
Arhgap24	0.0799748	-1.2606	0.02	0.041	1	4
Fbxl14	0.343444	-1.25717	0.031	0.043	1	4
Ercc8	0.997245	-1.25482	0.02	0.02	1	4
Rsph10b	0.101335	-1.25458	0.003	0.014	1	4
Cobl	0.0253994	-1.25393	0.017	0.045	1	4
Csrnp2	0.545595	-1.2535	0.028	0.035	1	4
Oxnad1	0.97221	-1.25013	0.014	0.014	1	4
Msc	0.945775	-1.24745	0.011	0.012	1	4
Comtd1	0.65814	-1.24682	0.04	0.045	1	4
Il1rl1	0.474448	-1.24658	0.008	0.014	1	4
Trim46	0.423101	-1.24507	0.014	0.022	1	4
Entrep1	0.000280339	-1.24505	0.025	0.086	1	4
Rpp14	0.47235	-1.24439	0.048	0.059	1	4
Abca2	0.0170138	-1.24294	0.076	0.125	1	4
Pnpo	0.134872	-1.23987	0.025	0.045	1	4
Bloc1s5	0.261548	-1.23841	0.025	0.039	1	4
Med20	0.0891053	-1.23825	0.051	0.08	1	4
Cmtr1	0.906363	-1.23778	0.042	0.043	1	4
Vill	0.357251	-1.2376	0.006	0.012	1	4
Nckipsd	0.0351261	-1.23755	0.031	0.063	1	4
Klrb1b	0.654231	-1.23716	0.028	0.033	1	4
Zfp341	0.706838	-1.23708	0.037	0.041	1	4
Lynx1	0.339375	-1.23578	0.011	0.02	1	4
Homer2	0.641127	-1.23258	0.008	0.012	1	4
Dok3	0.00721224	-1.23216	0.011	0.043	1	4
Sfxn1	0.800929	-1.23143	0.088	0.09	1	4
Plod2	0.943396	-1.23113	0.011	0.012	1	4
Ccdc127	0.683147	-1.23029	0.065	0.07	1	4
Gdf11	0.773674	-1.23007	0.017	0.02	1	4
Rufy1	0.113249	-1.22981	0.13	0.164	1	4
Gm10974	0.450425	-1.22865	0.037	0.047	1	4
Hemk1	0.105826	-1.2283	0.017	0.035	1	4
Ston1	0.251951	-1.22825	0.006	0.014	1	4
Cfap43	0.566408	-1.22823	0.034	0.041	1	4
Zfp33b	0.142803	-1.22618	0.045	0.068	1	4
Btd	0.112273	-1.22589	0.017	0.035	1	4
Kalrn	0.537288	-1.22528	0.014	0.02	1	4
Tst	0.354641	-1.22443	0.006	0.012	1	4
Pomk	0.475372	-1.22387	0.008	0.014	1	4
Cd19	0.358123	-1.22314	0.006	0.012	1	4
Uros	0.392596	-1.22258	0.034	0.045	1	4
Bpnt1	0.103844	-1.2222	0.04	0.065	1	4
Nsmce3	7.8609e-06	-1.22148	0.113	0.229	0.130098	4
Ninj2	0.984365	-1.21671	0.042	0.041	1	4
Trf	0.0107498	-1.21648	0.054	0.1	1	4
Zfp970	0.479078	-1.21595	0.008	0.014	1	4
Lims2	0.187316	-1.21573	0.008	0.02	1	4
Retn	0.387525	-1.21571	0.011	0.006	1	4
Kat5	0.179024	-1.21538	0.073	0.098	1	4
P3h1	0.053479	-1.21411	0.034	0.063	1	4
Crip2	0.104899	-1.21377	0.014	0.031	1	4
Tmem101	0.173559	-1.21305	0.023	0.039	1	4
Capn10	0.106246	-1.21206	0.017	0.035	1	4
Zbtb42	0.175884	-1.21176	0.006	0.016	1	4
Pgm2	0.136952	-1.21157	0.04	0.063	1	4
Gpr65	0.63548	-1.21089	0.09	0.078	1	4
Nup62cl	0.378708	-1.21081	0.014	0.008	1	4
H1f5	0.0540341	-1.20974	0.051	0.084	1	4
Fnip2	0.978486	-1.20828	0.062	0.061	1	4
Dmd	0.641127	-1.20777	0.008	0.012	1	4
Tmem107	0.633258	-1.20635	0.008	0.012	1	4
Kdr	0.607736	-1.20572	0.011	0.008	1	4
Gpr141	0.104791	-1.20384	0.025	0.047	1	4
Fancf	0.256762	-1.20317	0.011	0.022	1	4
Cyp4f17	0.938045	-1.20067	0.017	0.018	1	4
Nbeal2	0.433288	-1.19999	0.045	0.057	1	4
Rab26	0.0752954	-1.19822	0.031	0.057	1	4
Snai1	0.972879	-1.19806	0.025	0.025	1	4
Dhx58	0.0264055	-1.19769	0.023	0.053	1	4
Fcgr2b	0.0276564	-1.19693	0.028	0.061	1	4
Clec9a	0.240554	-1.19558	0.017	0.029	1	4
Llgl1	0.021384	-1.19131	0.028	0.063	1	4
Slc12a8	0.840581	-1.18878	0.008	0.01	1	4
Clec2g	0.167772	-1.18609	0.025	0.043	1	4
Tma16	0.38863	-1.18604	0.062	0.076	1	4
Cdk15	0.25065	-1.18257	0.006	0.014	1	4
Zbtb14	0.342503	-1.18207	0.048	0.063	1	4
Asah2	0.322188	-1.181	0.014	0.023	1	4
Dennd2b	0.00476381	-1.18044	0.073	0.131	1	4
Amz1	0.185546	-1.17939	0.017	0.031	1	4
Cacnb4	0.00680155	-1.17856	0.034	0.078	1	4
Klhdc2	0.369248	-1.17814	0.093	0.11	1	4
Lif	0.962408	-1.17783	0.014	0.014	1	4
Zc2hc1c	0.605403	-1.17675	0.011	0.008	1	4
Zkscan7	0.64349	-1.17612	0.042	0.049	1	4
Acot1	0.63775	-1.17531	0.008	0.012	1	4
Edn1	0.837972	-1.1749	0.008	0.01	1	4
6030458C11Rik	0.0487918	-1.1748	0.045	0.078	1	4
Tulp3	0.401552	-1.1743	0.017	0.025	1	4
Pex6	0.0981773	-1.17367	0.065	0.096	1	4
Thap4	0.82883	-1.17301	0.031	0.033	1	4
Atg9b	0.945775	-1.17259	0.011	0.012	1	4
Map3k15	0.474448	-1.17219	0.008	0.014	1	4
Cenpl	0.716315	-1.17208	0.054	0.059	1	4
Pltp	0.28169	-1.17195	0.023	0.035	1	4
Nr1h3	0.104458	-1.17194	0.011	0.027	1	4
LTO1	0.0524181	-1.1715	0.04	0.07	1	4
Baiap3	0.348799	-1.17141	0.008	0.016	1	4
Pigh	0.0594373	-1.16917	0.014	0.035	1	4
1700066M21Rik	0.586161	-1.16904	0.011	0.016	1	4
Pigb	0.218103	-1.16691	0.023	0.037	1	4
Cnr2	0.00178089	-1.16485	0.042	0.1	1	4
Il12b	0.565844	-1.16045	0.034	0.041	1	4
Bcam	0.824965	-1.15862	0.02	0.018	1	4
Serinc2	0.251951	-1.15846	0.006	0.014	1	4
Uggt2	0.601911	-1.15831	0.011	0.008	1	4
Gm6133	0.839276	-1.15385	0.008	0.01	1	4
Pde5a	0.372637	-1.15326	0.02	0.029	1	4
Ifi204	0.701182	-1.1522	0.02	0.023	1	4
Neurl1b	0.751017	-1.15219	0.011	0.014	1	4
Trmt44	0.522548	-1.15132	0.031	0.039	1	4
Dhcr7	0.212618	-1.15104	0.025	0.041	1	4
Ckap2l	0.340656	-1.15054	0.011	0.02	1	4
Cox6a2	0.885792	-1.1495	0.034	0.035	1	4
Polr1c	0.00297989	-1.1482	0.045	0.1	1	4
Pnkp	0.64142	-1.14808	0.093	0.1	1	4
Gnaz	0.50646	-1.14798	0.006	0.01	1	4
Selenom	0.00174327	-1.14775	0.045	0.104	1	4
Spata7	0.347293	-1.14723	0.023	0.033	1	4
Arg2	0.156931	-1.1459	0.031	0.051	1	4
Rdh5	0.708873	-1.14567	0.042	0.047	1	4
Plpp2	0.472603	-1.14522	0.008	0.014	1	4
Grik1	0.175565	-1.14342	0.023	0.039	1	4
Fam53c	0.344469	-1.14065	0.062	0.078	1	4
Zfpl1	0.0201597	-1.14059	0.034	0.07	1	4
Kctd3	0.0763297	-1.14051	0.048	0.078	1	4
Tgtp1	0.356928	-1.13722	0.008	0.016	1	4
Ccdc32	0.484117	-1.13611	0.068	0.055	1	4
Robo1	0.0981914	-1.1341	0.008	0.023	1	4
Ogfod2	0.902812	-1.1318	0.031	0.029	1	4
Slc12a4	0.828985	-1.13158	0.028	0.025	1	4
Gdpd3	0.156214	-1.13148	0.04	0.061	1	4
Slc27a4	0.105197	-1.13069	0.017	0.035	1	4
Rapgef5	0.00675617	-1.12826	0.028	0.07	1	4
Akip1	0.0912602	-1.12818	0.034	0.059	1	4
Hrh2	0.612912	-1.12716	0.023	0.018	1	4
Iigp1	0.325576	-1.12623	0.014	0.023	1	4
Kifc1	0.151587	-1.12613	0.003	0.012	1	4
Arhgap11a	0.576257	-1.12569	0.04	0.047	1	4
Styxl1	0.589926	-1.12397	0.011	0.016	1	4
Dpp7	0.11441	-1.12355	0.017	0.006	1	4
Thap1	0.618397	-1.12145	0.031	0.037	1	4
Cep131	0.586161	-1.12083	0.011	0.016	1	4
Ctdspl	0.421729	-1.11813	0.014	0.022	1	4
Abca9	0.151587	-1.11756	0.003	0.012	1	4
Tyms	0.414213	-1.11731	0.04	0.051	1	4
Lix1l	0.193693	-1.11621	0.028	0.045	1	4
Ppt2	0.0425796	-1.11573	0.034	0.065	1	4
Sox12	0.848972	-1.11561	0.014	0.016	1	4
Cgas	0.180675	-1.11529	0.042	0.063	1	4
Ddx59	0.773338	-1.11281	0.031	0.027	1	4
Tmem129	0.751017	-1.11132	0.011	0.014	1	4
Arsg	0.338096	-1.10989	0.011	0.02	1	4
Trim39	0.367738	-1.10908	0.079	0.096	1	4
Zfp157	0.218027	-1.10893	0.054	0.074	1	4
C77080	0.13575	-1.10855	0.037	0.059	1	4
Il20ra	0.377856	-1.10722	0.014	0.008	1	4
Fdxr	0.0808788	-1.10702	0.054	0.084	1	4
Nob1	0.109863	-1.10681	0.051	0.078	1	4
Zfp993	0.625087	-1.10506	0.017	0.022	1	4
Tmc8	0.104256	-1.10462	0.025	0.047	1	4
Gtf2ird2	0.261746	-1.10171	0.051	0.068	1	4
Ankrd52	0.95885	-1.10132	0.079	0.078	1	4
Tmem159	0.0164392	-1.1007	0.028	0.065	1	4
9130023H24Rik	0.251951	-1.10033	0.006	0.014	1	4
Ift43	7.0236e-05	-1.09896	0.042	0.121	1	4
Fam207a	0.19431	-1.09745	0.065	0.088	1	4
Polk	0.000590883	-1.09733	0.051	0.119	1	4
Sgf29	0.684104	-1.09633	0.045	0.051	1	4
Clhc1	0.21766	-1.09588	0.014	0.006	1	4
Ccsap	0.444227	-1.09248	0.025	0.018	1	4
Mb21d2	0.0462274	-1.09223	0.003	0.018	1	4
Lrrn3	0.841887	-1.09219	0.008	0.01	1	4
Mogat1	0.101335	-1.09131	0.003	0.014	1	4
Mn1	0.904731	-1.09012	0.028	0.029	1	4
Casp9	0.262417	-1.08989	0.045	0.063	1	4
Timd4	0.629985	-1.08864	0.017	0.022	1	4
Khk	0.687751	-1.08847	0.062	0.068	1	4
Dis3l	0.0201381	-1.08686	0.031	0.067	1	4
Adam15	0.960044	-1.08588	0.028	0.027	1	4
Tefm	0.334146	-1.08576	0.014	0.023	1	4
Xkr4	0.358997	-1.08521	0.006	0.012	1	4
Rpf1	0.217339	-1.08502	0.124	0.149	1	4
Jag2	0.727705	-1.0834	0.025	0.022	1	4
Myh10	0.469327	-1.08324	0.02	0.027	1	4
Sult2b1	0.53781	-1.08075	0.028	0.022	1	4
Katnbl1	0.00905851	-1.08064	0.048	0.096	1	4
Cables2	0.0475806	-1.08048	0.042	0.076	1	4
Usp42	0.614067	-1.08047	0.037	0.043	1	4
Ppp5c	0.0763269	-1.08001	0.065	0.1	1	4
Adgra2	0.586161	-1.07909	0.011	0.016	1	4
Manbal	0.000483313	-1.07902	0.195	0.292	1	4
Cops7b	0.965557	-1.07881	0.031	0.031	1	4
Slc35f6	0.300468	-1.07663	0.037	0.051	1	4
Dck	0.793356	-1.07462	0.04	0.043	1	4
Vangl2	0.129809	-1.07206	0.028	0.049	1	4
Nup37	0.346804	-1.07113	0.023	0.033	1	4
Scly	0.0354234	-1.06996	0.073	0.115	1	4
Kif23	0.775529	-1.06912	0.031	0.027	1	4
Zpr1	0.398681	-1.06888	0.102	0.119	1	4
Map2	0.245365	-1.06886	0.028	0.043	1	4
Enox1	0.105087	-1.06841	0.02	0.039	1	4
Tmem214	0.242302	-1.06809	0.051	0.07	1	4
Dennd5b	0.236864	-1.06761	0.031	0.047	1	4
Tubb4b	0.00526653	-1.06615	0.085	0.147	1	4
Traf4	0.203002	-1.06581	0.028	0.045	1	4
Dnmt1	0.940064	-1.06517	0.116	0.112	1	4
Tspan17	0.107822	-1.06348	0.014	0.031	1	4
Pcgf6	0.854768	-1.06313	0.051	0.053	1	4
Ogg1	0.245365	-1.06309	0.028	0.043	1	4
Dusp6	0.15967	-1.06276	0.028	0.047	1	4
Cdh26	0.0452396	-1.06256	0.017	0.041	1	4
Poglut2	0.140939	-1.06218	0.017	0.033	1	4
Mamstr	0.101684	-1.0613	0.003	0.014	1	4
Sez6l2	0.503042	-1.0597	0.006	0.01	1	4
Med9	0.878191	-1.05915	0.068	0.068	1	4
Rpa1	0.37351	-1.0585	0.09	0.106	1	4
Abhd10	0.186	-1.05717	0.062	0.086	1	4
Pcsk6	0.352479	-1.05678	0.008	0.016	1	4
Bik	0.526599	-1.05671	0.017	0.012	1	4
Supv3l1	0.898815	-1.05636	0.073	0.074	1	4
Or5v1	0.497716	-1.05512	0.02	0.014	1	4
Kcnh3	0.47815	-1.05487	0.008	0.014	1	4
Gapt	0.13562	-1.05412	0.008	0.022	1	4
Tbl3	0.83695	-1.05387	0.068	0.07	1	4
Mtrr	0.704822	-1.05369	0.02	0.023	1	4
Gm20517	0.534538	-1.05288	0.037	0.045	1	4
Macc1	0.632137	-1.05263	0.008	0.012	1	4
Cebpzos	0.0408316	-1.05251	0.062	0.1	1	4
Sigirr	0.198966	-1.0521	0.079	0.102	1	4
Tmem242	0.147683	-1.05161	0.071	0.096	1	4
Apoo	0.314429	-1.05066	0.028	0.041	1	4
Ppil1	0.548052	-1.05051	0.054	0.063	1	4
Cd320	0.501389	-1.04932	0.025	0.033	1	4
Prmt2	0.504794	-1.04726	0.056	0.067	1	4
Uxs1	0.0635916	-1.04671	0.116	0.157	1	4
Rpap1	0.0370051	-1.04657	0.025	0.055	1	4
Fat1	0.940289	-1.04538	0.037	0.037	1	4
Anxa1	0.00987685	-1.04528	0.079	0.133	1	4
Fgfr1	0.536059	-1.04453	0.056	0.067	1	4
Gm14325	0.118058	-1.04335	0.045	0.07	1	4
Mrps36	0.20016	-1.04291	0.127	0.153	1	4
Tmem237	0.039185	-1.04165	0.011	0.033	1	4
Pkn3	0.951726	-1.04018	0.011	0.012	1	4
Slpi	0.847767	-1.03921	0.02	0.022	1	4
Atp8a2	0.761405	-1.03837	0.028	0.031	1	4
Kctd21	0.188637	-1.03829	0.008	0.02	1	4
Tcaf2	0.0482299	-1.03765	0.008	0.027	1	4
Ltc4s	0.000170937	-1.03643	0.079	0.166	1	4
Smim19	0.285851	-1.03639	0.085	0.104	1	4
Trim30b	0.0400827	-1.03606	0.011	0.033	1	4
Rhobtb2	0.332959	-1.03309	0.025	0.037	1	4
Crtam	0.92574	-1.03175	0.023	0.022	1	4
Spsb2	0.318434	-1.03121	0.042	0.057	1	4
Slc1a2	0.384735	-1.03103	0.028	0.039	1	4
Aip	0.245852	-1.03025	0.155	0.176	1	4
Fads1	0.232444	-1.02782	0.02	0.033	1	4
Gm12166	0.50418	-1.02781	0.006	0.01	1	4
Tnfrsf19	0.396068	-1.02709	0.017	0.025	1	4
Mtcp1	0.108245	-1.02482	0.023	0.043	1	4
Nckap5l	0.283514	-1.02458	0.034	0.049	1	4
Phf13	0.719992	-1.02381	0.025	0.029	1	4
Cdca5	0.387525	-1.02183	0.011	0.006	1	4
Zfp764	0.962408	-1.02176	0.014	0.014	1	4
Sirpb1b	0.967853	-1.021	0.014	0.014	1	4
Unc13a	0.343874	-1.02069	0.011	0.02	1	4
Adat1	0.500316	-1.02062	0.04	0.049	1	4
Xrcc2	0.103743	-1.02061	0.011	0.027	1	4
Myof	0.00025463	-1.02043	0.068	0.151	1	4
Tpcn1	0.719211	-1.02016	0.042	0.047	1	4
Atg4c	0.00741299	-1.01879	0.056	0.108	1	4
Usp30	0.539867	-1.01861	0.028	0.022	1	4
Adarb1	0.0974471	-1.01841	0.008	0.023	1	4
Med23	0.471082	-1.01779	0.09	0.104	1	4
Pkd2	0.00937501	-1.01692	0.042	0.088	1	4
B4galt6	0.146985	-1.01518	0.076	0.104	1	4
Vash2	0.127039	-1.01509	0.02	0.008	1	4
Ip6k3	0.70928	-1.01478	0.02	0.023	1	4
Bicd2	0.0707902	-1.01437	0.037	0.065	1	4
Tmem126b	0.166102	-1.01274	0.04	0.061	1	4
Gpaa1	0.0596968	-1.01246	0.031	0.059	1	4
Bora	0.153718	-1.01177	0.031	0.051	1	4
Cdc7	0.684233	-1.01141	0.034	0.039	1	4
Cep76	0.693924	-1.00819	0.02	0.023	1	4
Mis18bp1	0.966764	-1.00816	0.014	0.014	1	4
Etfb	0.0920328	-1.00796	0.121	0.159	1	4
Macroh2a2	0.0684589	-1.0073	0.003	0.016	1	4
Cand2	0.998163	-1.00644	0.02	0.02	1	4
Dyrk1b	0.107515	-1.00575	0.017	0.035	1	4
Oas1c	0.354186	-1.00559	0.023	0.033	1	4
Dvl3	0.0935335	-1.00511	0.073	0.045	1	4
Myl12b	0.000160526	-1.00502	0.223	0.323	1	4
Letmd1	0.465247	-1.00388	0.037	0.047	1	4
Taf6l	0.213798	-1.00375	0.045	0.065	1	4
Ly6a	0.615403	-1.00288	0.056	0.065	1	4
Prg2	0.854121	-1.00237	0.014	0.016	1	4
Apba3	0.187151	-1.00209	0.014	0.027	1	4
Gbp7	0.761959	-1.00061	0.065	0.068	1	4
Tarbp1	0.324444	-1.00046	0.014	0.023	1	4
Alg2	0.169614	-1.00036	0.056	0.08	1	4
Tdp2	0.00263401	-0.999043	0.079	0.145	1	4
Axl	0.178764	-0.998267	0.006	0.016	1	4
Pfn2	0.19354	-0.997957	0.031	0.049	1	4
Vangl1	0.507911	-0.997832	0.017	0.023	1	4
Gm28044	0.0757564	-0.997531	0.011	0.002	1	4
Pax5	0.251476	-0.996643	0.014	0.025	1	4
Bace1	0.466146	-0.996548	0.02	0.027	1	4
Eva1c	0.226258	-0.99636	0.003	0.01	1	4
Pex13	0.000447584	-0.996032	0.203	0.305	1	4
Acrbp	0.474221	-0.995054	0.034	0.043	1	4
Maneal	0.839276	-0.994164	0.008	0.01	1	4
Fblim1	0.49511	-0.992831	0.045	0.055	1	4
Tmem115	0.138536	-0.991668	0.034	0.055	1	4
Fam3c	0.646719	-0.991011	0.076	0.082	1	4
Nol9	0.549861	-0.99097	0.071	0.08	1	4
Rnf25	0.113105	-0.990696	0.062	0.09	1	4
Lyz2	0.100785	-0.99035	0.11	0.147	1	4
Nnat	0.32671	-0.989768	0.014	0.023	1	4
Sdc2	0.132918	-0.98861	0.028	0.049	1	4
Lonp1	0.375522	-0.987223	0.088	0.104	1	4
Etnk2	0.359872	-0.986471	0.006	0.012	1	4
Cyb5r4	0.060524	-0.985482	0.144	0.19	1	4
Bst2	0.00355946	-0.984171	0.237	0.323	1	4
Tnfrsf8	0.340656	-0.982979	0.011	0.02	1	4
Mospd2	0.367582	-0.982866	0.079	0.094	1	4
Ifng	0.412646	-0.982092	0.034	0.045	1	4
Adgrl2	0.479824	-0.981217	0.034	0.043	1	4
Tor3a	0.628518	-0.979849	0.071	0.078	1	4
Rps27rt	0.00025021	-0.978727	0.161	0.258	1	4
Mier3	0.154974	-0.977093	0.076	0.104	1	4
Ccl22	0.000752774	-0.977009	0.144	0.237	1	4
Rdh10	0.256762	-0.97586	0.011	0.022	1	4
Aida	0.888205	-0.975365	0.073	0.074	1	4
Marchf1	0.0826906	-0.974928	0.04	0.067	1	4
Cyc1	0.229709	-0.974404	0.144	0.166	1	4
Sf3a2	0.554415	-0.973107	0.065	0.074	1	4
H2bc27	0.00155844	-0.972791	0.059	0.123	1	4
Rasl11a	0.781244	-0.972618	0.023	0.025	1	4
Fbxw17	0.013304	-0.972224	0.054	0.1	1	4
Trim12c	0.0891856	-0.972206	0.15	0.19	1	4
Pde7b	0.839382	-0.972184	0.042	0.039	1	4
Tspan8	0.226258	-0.971787	0.003	0.01	1	4
Ddx28	0.252867	-0.970421	0.014	0.025	1	4
Ccdc91	0.527251	-0.970108	0.079	0.067	1	4
Oas1g	0.226998	-0.969597	0.003	0.01	1	4
Ptges2	0.980973	-0.969593	0.025	0.025	1	4
Trnau1ap	0.0278861	-0.969586	0.096	0.147	1	4
Zfp629	0.203298	-0.968962	0.028	0.045	1	4
Taf11	0.120167	-0.968705	0.09	0.121	1	4
Tmem97	0.931804	-0.967368	0.023	0.022	1	4
Zfp938	0.0793799	-0.96568	0.017	0.037	1	4
Fkbp2	0.930693	-0.965139	0.121	0.115	1	4
Tprn	0.300283	-0.965139	0.02	0.031	1	4
3110082I17Rik	0.955075	-0.964303	0.051	0.051	1	4
Poln	0.638875	-0.96357	0.008	0.012	1	4
Ifit3	0.257124	-0.961539	0.008	0.018	1	4
Chchd10	0.789658	-0.960615	0.04	0.043	1	4
Dap	2.19707e-05	-0.960603	0.218	0.342	0.363615	4
Hsd11b1	0.703512	-0.959581	0.065	0.057	1	4
Ddx60	0.0550148	-0.959463	0.068	0.106	1	4
ENSMUSG00000079190	0.14172	-0.958786	0.011	0.025	1	4
Riox2	0.731881	-0.956758	0.065	0.07	1	4
Gdpgp1	0.624272	-0.956287	0.017	0.022	1	4
Zfp524	0.199104	-0.955341	0.056	0.078	1	4
Osbpl2	0.599096	-0.954786	0.062	0.07	1	4
Diras2	0.505319	-0.95472	0.006	0.01	1	4
Nenf	0.024604	-0.954367	0.099	0.147	1	4
Triobp	0.0284647	-0.954165	0.102	0.151	1	4
Hgh1	0.462556	-0.953717	0.023	0.016	1	4
Snrnp35	0.142483	-0.95274	0.014	0.029	1	4
Tcp11l2	0.437195	-0.952416	0.096	0.11	1	4
Tubg1	0.5715	-0.9516	0.034	0.041	1	4
Gne	0.187582	-0.950988	0.048	0.068	1	4
Nox1	0.701991	-0.950846	0.02	0.023	1	4
Twnk	0.324444	-0.950514	0.014	0.023	1	4
Mpg	0.346597	-0.950348	0.054	0.068	1	4
Brpf3	0.253296	-0.949792	0.071	0.051	1	4
Dcstamp	0.357673	-0.949367	0.008	0.016	1	4
Ak8	0.395462	-0.948697	0.017	0.025	1	4
Abcb1b	0.198172	-0.948446	0.164	0.192	1	4
Gtf3c6	0.176656	-0.945929	0.105	0.131	1	4
Asprv1	0.194959	-0.944384	0.056	0.078	1	4
Glb1l	0.361164	-0.943505	0.023	0.033	1	4
Kcnk13	0.427232	-0.943372	0.014	0.022	1	4
Pde8b	0.585222	-0.943015	0.011	0.016	1	4
Gtf2h4	0.0842042	-0.942936	0.025	0.049	1	4
Nkiras2	0.788427	-0.94266	0.04	0.043	1	4
Eif4ebp1	0.195564	-0.940575	0.042	0.063	1	4
Rdh13	0.850002	-0.938682	0.014	0.016	1	4
Arpc5l	0.00050334	-0.937853	0.181	0.274	1	4
Prss30	0.109423	-0.937835	0.014	0.031	1	4
Cdkn2b	0.00266874	-0.937745	0.099	0.17	1	4
Ncf4	0.518073	-0.935172	0.113	0.123	1	4
Rubcnl	0.336815	-0.935015	0.068	0.084	1	4
Mapk3	0.00395459	-0.933711	0.088	0.153	1	4
Adgrl4	0.687654	-0.933013	0.014	0.018	1	4
Mbip	0.166424	-0.931967	0.105	0.133	1	4
Sema6a	0.352548	-0.931632	0.054	0.068	1	4
Snx7	0.893186	-0.931135	0.031	0.029	1	4
Slx4	0.924195	-0.931065	0.023	0.023	1	4
Mgat2	0.433086	-0.930916	0.107	0.123	1	4
Fbxo32	0.852471	-0.929564	0.048	0.045	1	4
Pml	0.00762226	-0.929188	0.051	0.102	1	4
Ralb	0.128025	-0.928535	0.037	0.059	1	4
Dapk1	0.015105	-0.928064	0.068	0.117	1	4
Hs3st1	0.598588	-0.927732	0.025	0.031	1	4
Sart3	0.0303711	-0.92677	0.093	0.141	1	4
Hspb6	0.24306	-0.926614	0.017	0.029	1	4
Slc27a1	0.285509	-0.926503	0.042	0.059	1	4
Hif1an	0.277277	-0.925406	0.076	0.096	1	4
Fbxo28	0.0244755	-0.922567	0.133	0.188	1	4
Ogfod3	0.141408	-0.921655	0.011	0.025	1	4
Frg2f1	0.254036	-0.921652	0.037	0.023	1	4
Lrrc1	0.386845	-0.920777	0.085	0.102	1	4
Ttll12	0.876255	-0.919928	0.025	0.023	1	4
Spa17	0.186423	-0.919073	0.014	0.027	1	4
Npy1r	0.187577	-0.918588	0.017	0.031	1	4
Tarm1	0.936138	-0.918173	0.023	0.022	1	4
Fbxo47	0.385569	-0.918153	0.011	0.006	1	4
Camk2n1	0.585222	-0.917987	0.011	0.016	1	4
Efcc1	0.145106	-0.916767	0.014	0.029	1	4
Dcaf4	0.068159	-0.915956	0.054	0.086	1	4
Prkaca	0.277679	-0.914784	0.071	0.09	1	4
Gna11	0.9753	-0.914343	0.054	0.053	1	4
Foxred1	0.139555	-0.912839	0.068	0.096	1	4
Cstb	0.000190575	-0.91188	0.192	0.294	1	4
Rbm48	0.0192207	-0.910778	0.048	0.09	1	4
Cul7	0.242749	-0.910337	0.048	0.067	1	4
Mfge8	0.00203403	-0.908877	0.172	0.252	1	4
Slc35a2	0.110343	-0.908447	0.037	0.061	1	4
Kri1	0.120309	-0.907948	0.088	0.119	1	4
Ccdc157	0.603004	-0.907913	0.045	0.037	1	4
Bmi1	0.0572209	-0.907723	0.051	0.084	1	4
Mvk	0.100135	-0.90652	0.034	0.059	1	4
Zdhhc14	0.0205921	-0.905847	0.116	0.172	1	4
Gpc1	0.168443	-0.904464	0.062	0.086	1	4
Serpine2	0.222275	-0.903919	0.017	0.008	1	4
Drg2	0.247984	-0.903771	0.048	0.067	1	4
Tax1bp3	0.0201259	-0.90349	0.073	0.119	1	4
Ift172	0.0805354	-0.903429	0.079	0.114	1	4
Shc1	0.644598	-0.903313	0.073	0.08	1	4
Fam229b	0.980973	-0.901136	0.025	0.025	1	4
Vdr	0.0398818	-0.901097	0.011	0.033	1	4
Rab4b	0.14172	-0.901032	0.011	0.025	1	4
Tnfaip8l2	0.304371	-0.900635	0.11	0.129	1	4
Cpm	0.903544	-0.900116	0.054	0.055	1	4
Pkmyt1	0.647535	-0.899937	0.023	0.027	1	4
Casc1	0.753182	-0.899578	0.011	0.014	1	4
Ndufaf6	0.592648	-0.899183	0.056	0.065	1	4
Cyp2r1	0.144867	-0.899083	0.011	0.025	1	4
Chst10	0.560687	-0.898296	0.042	0.051	1	4
Gcat	0.324444	-0.898182	0.014	0.023	1	4
Map1a	0.384593	-0.898155	0.011	0.006	1	4
Ulbp1	0.101636	-0.896215	0.059	0.088	1	4
Zfand1	0.39851	-0.896144	0.054	0.067	1	4
Ptpn23	0.0538981	-0.896106	0.102	0.143	1	4
Ifit1	0.139592	-0.895739	0.023	0.041	1	4
Riox1	0.692875	-0.895479	0.037	0.031	1	4
Itpkc	0.0226722	-0.895352	0.014	0.041	1	4
Zfp7	0.851031	-0.894778	0.014	0.016	1	4
Zfp777	0.544468	-0.894111	0.048	0.057	1	4
Ndrg2	0.945775	-0.893948	0.011	0.012	1	4
Vstm2b	0.541333	-0.893764	0.014	0.02	1	4
Irgc1	0.484436	-0.891392	0.034	0.043	1	4
Zfp719	0.798515	-0.891189	0.051	0.047	1	4
Chchd4	0.853667	-0.891106	0.04	0.041	1	4
Tlcd3b	0.959269	-0.890209	0.028	0.027	1	4
Dnajc18	0.267858	-0.889178	0.054	0.072	1	4
Pfdn4	0.162321	-0.888875	0.093	0.119	1	4
Acsf3	0.995081	-0.888662	0.04	0.039	1	4
Ankrd37	0.543305	-0.887484	0.028	0.022	1	4
Atp23	0.415709	-0.886645	0.042	0.031	1	4
Hirip3	0.648923	-0.886381	0.048	0.055	1	4
Sdf2l1	0.0679156	-0.885129	0.11	0.149	1	4
Neurl4	0.61768	-0.88487	0.062	0.053	1	4
Hrh1	0.627036	-0.884813	0.031	0.025	1	4
Rgl1	0.959086	-0.883268	0.079	0.078	1	4
Tysnd1	0.910769	-0.882842	0.051	0.049	1	4
Fam53b	0.000387043	-0.881905	0.133	0.227	1	4
Gpc6	0.136619	-0.88163	0.008	0.022	1	4
Incenp	0.182288	-0.881467	0.034	0.053	1	4
Nle1	0.969219	-0.880498	0.031	0.031	1	4
Mast3	0.786399	-0.880392	0.124	0.127	1	4
Zfp597	0.296949	-0.879766	0.04	0.055	1	4
Ift46	0.693498	-0.878271	0.076	0.082	1	4
Rgmb	0.0527711	-0.877265	0.105	0.149	1	4
Cd79a	0.192686	-0.877262	0.011	0.023	1	4
Mmadhc	0.086925	-0.876478	0.073	0.106	1	4
Zfp729a	0.641954	-0.876039	0.048	0.055	1	4
Gm20498	0.257124	-0.875839	0.008	0.018	1	4
Ccdc166	0.143936	-0.874906	0.014	0.029	1	4
Ccl4	0.577061	-0.874651	0.071	0.08	1	4
Fis1	0.000293817	-0.874027	0.299	0.399	1	4
Isoc1	0.187709	-0.873702	0.093	0.119	1	4
Prelid3b	0.273593	-0.873	0.099	0.121	1	4
Fdps	0.686844	-0.872617	0.099	0.106	1	4
Spock1	0.456089	-0.872414	0.011	0.018	1	4
Plaat3	0.000787956	-0.8724	0.215	0.305	1	4
Cacna1c	0.391923	-0.872326	0.042	0.055	1	4
Stmn2	0.964586	-0.871635	0.014	0.014	1	4
Gm49336	0.698036	-0.871189	0.056	0.063	1	4
Klra17	0.45292	-0.870995	0.011	0.018	1	4
Slc41a2	0.00434295	-0.869888	0.085	0.149	1	4
Eef2kmt	0.413881	-0.869731	0.056	0.043	1	4
Mettl9	0.144644	-0.868377	0.107	0.137	1	4
Trpt1	0.151587	-0.868059	0.003	0.012	1	4
Nprl2	0.428265	-0.867407	0.04	0.051	1	4
Kctd4	0.68393	-0.867273	0.014	0.018	1	4
Hpgds	0.408955	-0.866057	0.056	0.07	1	4
Lmtk3	0.638875	-0.864528	0.008	0.012	1	4
1810024B03Rik	0.68215	-0.86331	0.079	0.07	1	4
Tufm	0.105671	-0.863019	0.051	0.078	1	4
Mtif3	0.0503582	-0.862992	0.082	0.123	1	4
Bub3	0.0602458	-0.862922	0.158	0.204	1	4
Hmces	0.837311	-0.862785	0.051	0.053	1	4
Tollip	0.875681	-0.862256	0.076	0.078	1	4
Pou5f2	0.463609	-0.862087	0.02	0.027	1	4
Nudt12	0.505319	-0.860899	0.006	0.01	1	4
Slc37a2	0.319428	-0.860623	0.017	0.027	1	4
Phf11a	0.0628696	-0.86009	0.045	0.076	1	4
Meig1	0.354681	-0.86	0.023	0.033	1	4
Mid1ip1	0.646338	-0.859497	0.048	0.055	1	4
Renbp	0.595764	-0.859142	0.073	0.082	1	4
Fggy	0.462024	-0.858588	0.079	0.065	1	4
Zfp619	0.620245	-0.858447	0.031	0.037	1	4
Ms4a6d	0.562432	-0.858349	0.014	0.01	1	4
Asnsd1	0.142542	-0.857136	0.088	0.115	1	4
Naa30	0.770673	-0.857091	0.076	0.08	1	4
Card10	0.353218	-0.856406	0.008	0.016	1	4
Mrto4	0.261627	-0.855798	0.073	0.094	1	4
Acsl1	0.20045	-0.855186	0.113	0.141	1	4
Scamp1	0.732496	-0.855157	0.042	0.047	1	4
S100a1	0.0193396	-0.854454	0.079	0.129	1	4
Vmac	0.70477	-0.854286	0.017	0.014	1	4
Mtrfr	0.651494	-0.854101	0.048	0.041	1	4
Ercc5	0.560693	-0.853344	0.085	0.096	1	4
Katna1	0.0673262	-0.851756	0.136	0.176	1	4
Ptgir	0.226998	-0.851549	0.003	0.01	1	4
Slc5a6	0.0818591	-0.851084	0.02	0.041	1	4
Paxx	0.0165037	-0.850593	0.076	0.127	1	4
Zfp518b	0.858244	-0.849899	0.014	0.016	1	4
Txlna	0.279092	-0.848815	0.082	0.102	1	4
Stard4	0.620226	-0.848569	0.051	0.043	1	4
Rhbdd2	0.530404	-0.848109	0.031	0.039	1	4
Igip	0.347049	-0.846759	0.02	0.012	1	4
Bcl2l12	0.316825	-0.846707	0.051	0.067	1	4
Gmppa	0.3232	-0.846577	0.051	0.067	1	4
Erbb2	0.63775	-0.846488	0.008	0.012	1	4
Lrrc75a	0.836667	-0.845276	0.008	0.01	1	4
Ddc	0.643383	-0.844957	0.008	0.012	1	4
Bfsp2	0.493211	-0.8442	0.034	0.043	1	4
Naxe	0.134501	-0.843689	0.099	0.131	1	4
Asl	0.02027	-0.843066	0.153	0.209	1	4
Rbm18	0.450456	-0.843048	0.073	0.086	1	4
Twsg1	0.543996	-0.843025	0.048	0.057	1	4
Ppp1r2	0.0218228	-0.842481	0.189	0.247	1	4
Ephb4	0.361037	-0.841223	0.017	0.01	1	4
Rxylt1	0.0599637	-0.841084	0.099	0.141	1	4
Mt2	0.0268106	-0.839999	0.065	0.11	1	4
Styx	0.335915	-0.839759	0.121	0.141	1	4
Gm21988	0.192194	-0.837742	0.008	0.02	1	4
Atp6v1g2	0.585066	-0.837585	0.04	0.047	1	4
Tmem128	0.00273113	-0.836905	0.212	0.294	1	4
Rimoc1	0.264792	-0.836532	0.073	0.094	1	4
Ly6c2	0.327496	-0.836532	0.051	0.067	1	4
Osbp	0.141783	-0.836043	0.105	0.135	1	4
Rnf126	0.414061	-0.835668	0.085	0.1	1	4
Oat	0.127815	-0.835094	0.11	0.145	1	4
Vwf	0.925884	-0.834414	0.023	0.023	1	4
1110059G10Rik	0.232146	-0.834046	0.065	0.086	1	4
Xpc	0.149822	-0.833285	0.054	0.078	1	4
Caprin2	0.572218	-0.832874	0.048	0.057	1	4
Akap7	0.0253371	-0.832042	0.113	0.166	1	4
Acsl5	0.0011913	-0.831261	0.13	0.213	1	4
Hmcn2	0.469965	-0.829757	0.02	0.027	1	4
Top1mt	0.103743	-0.829346	0.011	0.027	1	4
Rbm45	0.248173	-0.829216	0.062	0.082	1	4
Tm4sf5	0.132585	-0.828655	0.042	0.067	1	4
Nutf2	0.892724	-0.828319	0.017	0.016	1	4
H2-M2	0.000819592	-0.828028	0.331	0.429	1	4
Arl11	0.220517	-0.827777	0.023	0.037	1	4
Rce1	0.253804	-0.827667	0.059	0.078	1	4
Mars1	0.375345	-0.826739	0.045	0.059	1	4
H2ac11	0.843193	-0.824448	0.008	0.01	1	4
Slc35f2	0.402164	-0.822514	0.017	0.025	1	4
Nek8	0.331731	-0.822362	0.034	0.047	1	4
Ndrg3	0.0495378	-0.822296	0.042	0.076	1	4
Arid3b	0.833876	-0.8221	0.062	0.065	1	4
Nup205	0.555251	-0.821403	0.065	0.074	1	4
Mcrip2	0.345866	-0.821217	0.034	0.047	1	4
Pwwp3b	0.589926	-0.821034	0.011	0.016	1	4
Gpr89	0.273237	-0.820784	0.051	0.068	1	4
Unc5cl	0.426542	-0.820638	0.014	0.022	1	4
Ildr1	0.0374366	-0.820442	0.025	0.055	1	4
Ube2cbp	0.453711	-0.820357	0.011	0.018	1	4
H4c11	0.526599	-0.820206	0.017	0.012	1	4
Thap11	0.37319	-0.819985	0.037	0.049	1	4
Gorab	0.893263	-0.819969	0.04	0.041	1	4
Scfd2	0.142833	-0.819351	0.186	0.219	1	4
Slc35a4	0.703302	-0.818923	0.071	0.076	1	4
Osbpl7	0.213492	-0.818721	0.054	0.074	1	4
Golm2	0.0988849	-0.8184	0.045	0.072	1	4
Pef1	0.328295	-0.817854	0.062	0.078	1	4
Ccdc184	0.407081	-0.817488	0.017	0.025	1	4
Nicn1	0.238202	-0.817453	0.02	0.033	1	4
Prdm9	0.140678	-0.817408	0.02	0.037	1	4
Mppe1	0.380988	-0.817346	0.076	0.092	1	4
Nphp1	0.527491	-0.817341	0.017	0.012	1	4
Arc	0.000625919	-0.817067	0.068	0.143	1	4
C1qtnf12	0.081387	-0.816916	0.028	0.053	1	4
Atf7	0.0575044	-0.816733	0.054	0.088	1	4
Clptm1l	0.435424	-0.816729	0.124	0.141	1	4
Inhca	0.936098	-0.816426	0.017	0.018	1	4
Kdelr1	0.0272528	-0.816134	0.161	0.217	1	4
Ccnb1ip1	0.0373845	-0.815634	0.037	0.07	1	4
Spry4	0.579285	-0.815189	0.02	0.025	1	4
Rnf8	0.344231	-0.815189	0.096	0.115	1	4
Mrpl48	0.19546	-0.814905	0.116	0.145	1	4
Ephx1	0.0271516	-0.814889	0.025	0.057	1	4
Kcnmb4	0.447991	-0.813719	0.056	0.068	1	4
Kyat1	0.316038	-0.813486	0.025	0.016	1	4
Adm	0.00194058	-0.813431	0.124	0.202	1	4
Ica1	0.105406	-0.813123	0.017	0.035	1	4
Pitpnm2	0.381406	-0.813064	0.02	0.029	1	4
Zfp658	0.507911	-0.811857	0.017	0.023	1	4
Slc25a20	0.403113	-0.811801	0.068	0.082	1	4
Carhsp1	0.286316	-0.811672	0.023	0.035	1	4
Enthd1	0.364798	-0.811065	0.017	0.01	1	4
Catsperg1	0.0188444	-0.811053	0.048	0.09	1	4
Tedc2	0.257124	-0.810984	0.008	0.018	1	4
Dusp7	0.441861	-0.810809	0.04	0.029	1	4
Hikeshi	0.202225	-0.810385	0.113	0.137	1	4
Phldb1	0.22252	-0.809622	0.059	0.08	1	4
Sfn	0.854121	-0.809513	0.014	0.016	1	4
Ccdc149	0.982592	-0.809257	0.025	0.025	1	4
Ankrd40	0.160248	-0.809188	0.059	0.084	1	4
Gprc5d	0.946965	-0.808256	0.011	0.012	1	4
Tbc1d10a	0.132499	-0.808083	0.124	0.159	1	4
Prkd2	0.468211	-0.807712	0.073	0.086	1	4
Arl6	0.281281	-0.807614	0.045	0.063	1	4
Sh3gl1	0.0239613	-0.807593	0.169	0.223	1	4
Tkfc	0.645348	-0.807361	0.023	0.027	1	4
Copz2	0.25779	-0.807356	0.011	0.022	1	4
Cenpx	0.10406	-0.806989	0.161	0.196	1	4
Sap18b	0.773285	-0.806879	0.023	0.025	1	4
Apol10b	0.00174891	-0.806848	0.048	0.108	1	4
Tmem254	0.385797	-0.805812	0.056	0.07	1	4
Fam199x	0.765432	-0.805409	0.04	0.035	1	4
Ccnq	0.171896	-0.804215	0.04	0.061	1	4
Tmc6	0.104025	-0.802754	0.045	0.072	1	4
Mogs	0.478451	-0.802465	0.048	0.059	1	4
AW209491	0.942915	-0.801976	0.017	0.018	1	4
Smim29	0.114671	-0.801534	0.099	0.133	1	4
Pde11a	0.552391	-0.801112	0.014	0.01	1	4
Trip10	0.0342252	-0.801108	0.054	0.094	1	4
Oasl2	0.327578	-0.800713	0.025	0.037	1	4
C3ar1	0.971121	-0.80064	0.014	0.014	1	4
Mamld1	0.0385374	-0.800499	0.062	0.102	1	4
Mrps12	0.0361818	-0.800405	0.102	0.149	1	4
Il15	0.00196191	-0.800243	0.234	0.319	1	4
Ngrn	0.48524	-0.799289	0.076	0.088	1	4
Cryaa	0.531208	-0.799153	0.023	0.029	1	4
Cttnbp2nl	0.000853623	-0.798225	0.119	0.205	1	4
Tgif2	0.552704	-0.797241	0.068	0.078	1	4
Fbxw9	0.67811	-0.796912	0.045	0.051	1	4
Lrch4	0.808148	-0.796882	0.028	0.031	1	4
Smim27	0.713919	-0.795784	0.079	0.084	1	4
Abhd14b	0.467561	-0.795596	0.028	0.037	1	4
Psmd10	0.00780995	-0.795519	0.105	0.168	1	4
Arl8a	0.0995428	-0.795475	0.121	0.159	1	4
Stxbp6	0.17117	-0.794332	0.056	0.08	1	4
S1pr2	0.654113	-0.794113	0.023	0.027	1	4
Gm10643	0.385569	-0.793883	0.011	0.006	1	4
Klf11	0.778057	-0.79352	0.023	0.025	1	4
Slc25a11	0.00549859	-0.793325	0.167	0.241	1	4
Bop1	0.209469	-0.793285	0.068	0.09	1	4
Dgkh	0.0327173	-0.793105	0.082	0.127	1	4
Nutf2-ps1	0.226998	-0.793089	0.003	0.01	1	4
Pacc1	0.686336	-0.792852	0.068	0.074	1	4
Gm2000	0.000673329	-0.79135	0.15	0.239	1	4
Gfer	0.11361	-0.790871	0.124	0.159	1	4
Zfp14	0.353218	-0.790666	0.008	0.016	1	4
H2ax	0.182343	-0.790229	0.082	0.108	1	4
Spns1	0.924203	-0.789934	0.082	0.078	1	4
Tmem229b	0.513689	-0.78966	0.056	0.067	1	4
Pcbp4	0.331059	-0.788809	0.062	0.078	1	4
Coq7	0.347709	-0.787115	0.031	0.043	1	4
Cbx2	0.261411	-0.787017	0.011	0.022	1	4
Nup133	0.827429	-0.786464	0.054	0.057	1	4
Nudt18	0.237042	-0.786163	0.02	0.033	1	4
Rab20	0.0456889	-0.785267	0.042	0.076	1	4
Pola1	0.384858	-0.784992	0.082	0.098	1	4
Acd	0.932118	-0.784955	0.068	0.068	1	4
Lsm11	0.0121963	-0.784816	0.014	0.045	1	4
Fam228b	0.50646	-0.784452	0.006	0.01	1	4
Ppp1r35	0.394824	-0.783927	0.102	0.117	1	4
Commd1b	0.508745	-0.783463	0.006	0.01	1	4
Bbs7	0.178764	-0.783329	0.006	0.016	1	4
Zfp706	0.00364483	-0.783249	0.195	0.278	1	4
Aamdc	0.0518214	-0.783079	0.088	0.129	1	4
Slc16a7	0.142032	-0.782589	0.011	0.025	1	4
Calm5	0.179248	-0.782374	0.006	0.016	1	4
Ftsj3	0.380264	-0.782194	0.093	0.11	1	4
Cdc42bpb	0.125005	-0.781871	0.158	0.196	1	4
E130311K13Rik	0.126959	-0.780125	0.076	0.106	1	4
Ccdc61	0.854664	-0.780012	0.073	0.076	1	4
Rfc4	0.940288	-0.780006	0.062	0.059	1	4
Alg3	0.640895	-0.779437	0.031	0.025	1	4
Ankrd16	0.676106	-0.779403	0.105	0.112	1	4
Rgs20	0.749936	-0.779292	0.011	0.014	1	4
Nlrp1b	0.0253994	-0.778856	0.017	0.045	1	4
Spag1	0.763492	-0.777941	0.014	0.012	1	4
Rrp9	0.209937	-0.777258	0.062	0.084	1	4
Slc2a6	0.285982	-0.777112	0.079	0.1	1	4
Pnpla6	0.68314	-0.777069	0.088	0.094	1	4
Inpp5j	0.356184	-0.777025	0.008	0.016	1	4
Nme6	0.253694	-0.776654	0.011	0.022	1	4
Chmp1b	0.231599	-0.776314	0.099	0.123	1	4
Dcun1d2	0.627359	-0.776308	0.059	0.051	1	4
Ccl3	0.706386	-0.775156	0.062	0.055	1	4
Uqcc4	0.974222	-0.774822	0.124	0.121	1	4
Plekha4	0.530336	-0.773987	0.037	0.045	1	4
Cfap61	0.848644	-0.773766	0.02	0.022	1	4
Trap1	0.544813	-0.773503	0.127	0.137	1	4
Nbas	0.0526879	-0.773057	0.073	0.114	1	4
Pop7	0.443423	-0.772455	0.076	0.09	1	4
Rbm41	0.170174	-0.772056	0.093	0.121	1	4
Zfp105	0.753182	-0.772033	0.011	0.014	1	4
Mrpl44	0.676478	-0.770763	0.045	0.051	1	4
Bcdin3d	0.77929	-0.77042	0.028	0.031	1	4
Phlda3	0.227161	-0.768797	0.02	0.033	1	4
Bscl2	0.40628	-0.76746	0.085	0.1	1	4
Zfp385b	0.814307	-0.766607	0.028	0.025	1	4
Tatdn3	0.0444168	-0.764634	0.042	0.076	1	4
Prr33	0.640001	-0.764504	0.008	0.012	1	4
Tpp1	0.206601	-0.764471	0.088	0.114	1	4
Ruvbl2	0.70178	-0.764225	0.076	0.082	1	4
Insyn1	0.251951	-0.764171	0.006	0.014	1	4
Dolpp1	0.083664	-0.764093	0.014	0.033	1	4
Megf11	0.301625	-0.763556	0.031	0.045	1	4
Prkn	0.21415	-0.762441	0.062	0.084	1	4
Ctps2	0.138692	-0.762137	0.155	0.192	1	4
Klhl22	0.234592	-0.761989	0.045	0.065	1	4
Pfkl	0.163427	-0.76167	0.099	0.129	1	4
Smpdl3a	0.0189653	-0.761372	0.113	0.166	1	4
Zfp954	0.346316	-0.761146	0.023	0.033	1	4
Mt1	0.00227064	-0.761106	0.203	0.29	1	4
Phf1	0.13903	-0.761064	0.062	0.09	1	4
Eif2b4	0.88816	-0.761048	0.09	0.086	1	4
Swsap1	0.550284	-0.760897	0.014	0.02	1	4
Sgta	0.23931	-0.760324	0.088	0.11	1	4
Tnnt3	0.96237	-0.758648	0.028	0.027	1	4
Pck2	0.415739	-0.758122	0.028	0.02	1	4
Cenpp	0.310722	-0.756974	0.028	0.041	1	4
Gpr137c	0.879665	-0.756903	0.051	0.053	1	4
Mylpf	0.192304	-0.756609	0.014	0.027	1	4
Msantd1	0.102033	-0.756412	0.003	0.014	1	4
Eml3	0.22016	-0.756395	0.088	0.112	1	4
Brap	0.471737	-0.755756	0.124	0.137	1	4
Fstl4	0.0301359	-0.755616	0.028	0.061	1	4
Brip1	0.537288	-0.755329	0.014	0.02	1	4
Pkd1l2	0.50418	-0.755169	0.006	0.01	1	4
Slc29a3	0.0426509	-0.754238	0.088	0.131	1	4
Ephb3	0.84251	-0.753601	0.02	0.022	1	4
Pde6a	0.935125	-0.753477	0.017	0.018	1	4
Thap12	0.0926511	-0.753222	0.11	0.145	1	4
Ss18l1	0.999016	-0.753071	0.04	0.039	1	4
Hebp1	0.00192633	-0.752724	0.071	0.139	1	4
Ptar1	0.972143	-0.752528	0.071	0.07	1	4
Dync2i1	0.0435882	-0.752476	0.014	0.037	1	4
Sphk2	0.527831	-0.752435	0.045	0.055	1	4
Zw10	0.297882	-0.752409	0.062	0.08	1	4
Plekhs1	0.357673	-0.75231	0.008	0.016	1	4
Cenpc1	0.314057	-0.752221	0.093	0.114	1	4
Ttc21b	0.134211	-0.7519	0.025	0.045	1	4
Mdc1	0.736277	-0.751894	0.085	0.09	1	4
Crybg1	0.00341543	-0.751696	0.203	0.284	1	4
Gorasp1	0.50418	-0.751201	0.006	0.01	1	4
Erg	0.523037	-0.751168	0.017	0.012	1	4
Slc35g1	0.889721	-0.751004	0.017	0.016	1	4
Uhrf1bp1	0.844858	-0.75031	0.014	0.016	1	4
Hes7	0.831033	-0.750271	0.011	0.01	1	4
Msrb1	0.0735136	-0.749893	0.096	0.133	1	4
Cacna2d2	0.359872	-0.748235	0.006	0.012	1	4
Ehhadh	0.355441	-0.748099	0.008	0.016	1	4
Cmtm6	0.066562	-0.746675	0.153	0.194	1	4
Syn2	0.844499	-0.74653	0.008	0.01	1	4
Nxpe3	0.481632	-0.74646	0.099	0.112	1	4
Ap4b1	0.651917	-0.746361	0.023	0.027	1	4
Dipk1b	0.766421	-0.746127	0.017	0.02	1	4
Pmpcb	0.245392	-0.745347	0.102	0.127	1	4
Selenoi	0.807401	-0.744732	0.051	0.055	1	4
Isoc2a	0.304211	-0.744528	0.028	0.018	1	4
Tlr11	0.538397	-0.744163	0.023	0.029	1	4
Rpp25l	0.145566	-0.743746	0.082	0.11	1	4
Kctd10	0.206009	-0.742767	0.051	0.072	1	4
Rnf144b	0.0178567	-0.742367	0.04	0.08	1	4
Trat1	0.340679	-0.741464	0.04	0.027	1	4
Trappc5	0.193261	-0.741269	0.093	0.119	1	4
Zbtb34	0.731483	-0.741115	0.034	0.029	1	4
Prelid2	0.160732	-0.741089	0.051	0.074	1	4
Capn5	0.25779	-0.740949	0.011	0.022	1	4
Sphk1	0.778057	-0.740599	0.023	0.025	1	4
Fah	0.0286376	-0.740031	0.042	0.08	1	4
Slc20a2	0.349219	-0.738649	0.11	0.129	1	4
Csprs	0.151587	-0.738125	0.003	0.012	1	4
Tmem18	0.0682062	-0.738012	0.042	0.072	1	4
Itpa	0.447875	-0.737162	0.076	0.09	1	4
Ttll1	0.645605	-0.737079	0.017	0.022	1	4
Mavs	0.805751	-0.736782	0.045	0.041	1	4
Tradd	0.678796	-0.736688	0.073	0.08	1	4
Ager	0.643383	-0.736367	0.008	0.012	1	4
Hypk	0.11995	-0.736278	0.15	0.184	1	4
Tmem191	0.769744	-0.735441	0.023	0.02	1	4
Reep4	0.311601	-0.735029	0.045	0.031	1	4
Pgk1	0.0323989	-0.735028	0.144	0.2	1	4
Taf1c	0.453748	-0.734291	0.037	0.047	1	4
Zdhhc18	0.104872	-0.733655	0.186	0.227	1	4
Ran	0.00387565	-0.733617	0.246	0.325	1	4
Rnd3	0.130594	-0.733171	0.153	0.188	1	4
Pou2af1	0.481868	-0.733023	0.008	0.014	1	4
Tatdn1	0.212465	-0.732364	0.082	0.106	1	4
Tfdp2	0.000415549	-0.731711	0.088	0.17	1	4
Krtcap3	0.716356	-0.731682	0.025	0.029	1	4
Fstl1	0.248125	-0.730845	0.017	0.029	1	4
Cinp	0.724977	-0.730737	0.042	0.047	1	4
Lrrc20	0.737716	-0.730293	0.042	0.047	1	4
Shld1	0.457582	-0.730222	0.088	0.102	1	4
Dusp14	0.930953	-0.72949	0.023	0.023	1	4
Zfp111	0.445377	-0.728465	0.023	0.031	1	4
Znfx1	0.175963	-0.727954	0.13	0.16	1	4
Xpnpep3	0.600902	-0.727578	0.068	0.076	1	4
Tmtc1	0.453711	-0.727374	0.011	0.018	1	4
Slc25a16	0.444439	-0.727265	0.051	0.063	1	4
Cygb	0.47815	-0.726342	0.008	0.014	1	4
Osbp2	0.253257	-0.726111	0.006	0.014	1	4
Hint2	0.00194518	-0.725779	0.127	0.204	1	4
Oprm1	0.527196	-0.725552	0.037	0.045	1	4
Sf3b4	0.0211599	-0.724441	0.056	0.1	1	4
Klhl9	0.165632	-0.723962	0.102	0.131	1	4
Slc25a29	0.00649438	-0.723713	0.076	0.135	1	4
Trpm3	0.189522	-0.722205	0.008	0.02	1	4
Osgep	0.889297	-0.721948	0.164	0.16	1	4
Dbi	0.00844624	-0.720847	0.254	0.327	1	4
Lgals4	0.438914	-0.720754	0.025	0.018	1	4
Fbxo45	0.484482	-0.720753	0.085	0.098	1	4
Ccdc115	0.0907665	-0.720569	0.088	0.123	1	4
Dnal1	0.430441	-0.720354	0.023	0.031	1	4
Coa6	0.0230042	-0.720077	0.076	0.125	1	4
Kremen1	0.843868	-0.720032	0.048	0.051	1	4
Slc39a6	0.656034	-0.71985	0.073	0.082	1	4
Mrs2	0.428417	-0.719716	0.059	0.072	1	4
Wars1	0.274083	-0.719612	0.127	0.151	1	4
Mad2l1	0.606462	-0.718536	0.023	0.018	1	4
Tmem127	0.113363	-0.718206	0.121	0.157	1	4
Ccdc28b	0.0107049	-0.718004	0.136	0.2	1	4
Mocs3	0.374817	-0.717498	0.02	0.029	1	4
S1pr3	0.361582	-0.717079	0.031	0.043	1	4
Gmnn	0.0448068	-0.716835	0.059	0.096	1	4
Prpf38a	0.391917	-0.716484	0.107	0.125	1	4
Mccc2	0.0630253	-0.71599	0.025	0.051	1	4
Fem1a	0.168037	-0.715789	0.025	0.043	1	4
Mmp20	0.12109	-0.715508	0.045	0.07	1	4
Nthl1	0.425852	-0.71525	0.014	0.022	1	4
Cstf2t	0.750634	-0.715136	0.056	0.051	1	4
Dcakd	0.132229	-0.71488	0.042	0.067	1	4
Cdca4	0.445447	-0.714753	0.031	0.041	1	4
Csnk1e	0.257564	-0.714663	0.088	0.11	1	4
Dr1	0.368283	-0.714287	0.088	0.106	1	4
Onecut2	0.508745	-0.71424	0.006	0.01	1	4
Calu	0.695521	-0.714225	0.13	0.137	1	4
Zfp213	0.855006	-0.713419	0.025	0.027	1	4
Zkscan8	0.91968	-0.71225	0.023	0.022	1	4
Mier2	0.915316	-0.712202	0.028	0.029	1	4
Mettl14	0.912797	-0.712166	0.045	0.043	1	4
Vps33b	0.524227	-0.711965	0.031	0.039	1	4
Cog6	0.127264	-0.711879	0.031	0.053	1	4
Pdcd2l	0.675445	-0.711507	0.068	0.074	1	4
Smpd4	0.158387	-0.71139	0.045	0.068	1	4
Utp23	0.790907	-0.711138	0.051	0.055	1	4
Cuedc2	0.019214	-0.710606	0.136	0.192	1	4
4930579G24Rik	0.500764	-0.710478	0.017	0.023	1	4
Heatr1	0.753394	-0.710238	0.073	0.078	1	4
Rrm2b	0.51857	-0.709818	0.113	0.125	1	4
Exosc2	0.886929	-0.709708	0.04	0.037	1	4
Lcn4	0.505319	-0.708884	0.006	0.01	1	4
Cisd3	0.514753	-0.708862	0.031	0.039	1	4
Tmie	0.1778	-0.708826	0.006	0.016	1	4
Zfhx3	0.560726	-0.707771	0.144	0.157	1	4
Hps6	0.432776	-0.707497	0.014	0.022	1	4
Bcs1l	0.85747	-0.707172	0.025	0.023	1	4
Fam241a	0.231461	-0.707074	0.13	0.159	1	4
Cox20	0.258294	-0.706925	0.144	0.17	1	4
Ydjc	0.363329	-0.706903	0.037	0.025	1	4
Entr1	0.522996	-0.70681	0.093	0.106	1	4
Donson	0.0531495	-0.706532	0.065	0.102	1	4
Lysmd3	0.297791	-0.706264	0.048	0.065	1	4
Adh5	0.576421	-0.706217	0.189	0.2	1	4
Sike1	0.624298	-0.706068	0.093	0.102	1	4
Kif5a	0.359872	-0.705939	0.006	0.012	1	4
Unk	0.48826	-0.70567	0.113	0.125	1	4
Zfp26	0.445893	-0.705405	0.105	0.086	1	4
Grk6	0.659181	-0.705289	0.113	0.121	1	4
Insig1	0.515167	-0.704932	0.076	0.088	1	4
Crebzf	0.0425891	-0.704882	0.178	0.229	1	4
Anapc10	0.348083	-0.703524	0.147	0.166	1	4
Clcn2	0.775741	-0.703282	0.023	0.02	1	4
Polr2g	0.0319347	-0.703079	0.237	0.292	1	4
Snrpa	0.152708	-0.703054	0.105	0.137	1	4
Mafg	0.229402	-0.702603	0.079	0.102	1	4
Ppp1r3e	0.866711	-0.70243	0.025	0.027	1	4
Ccdc150	0.399719	-0.702233	0.017	0.025	1	4
Zscan2	0.399818	-0.701286	0.034	0.045	1	4
Pacs2	0.962529	-0.701031	0.105	0.102	1	4
Mgrn1	0.0539845	-0.70015	0.107	0.153	1	4
Bod1	0.150107	-0.699442	0.031	0.051	1	4
Ccdc9	0.820662	-0.698947	0.107	0.11	1	4
Lins1	0.131852	-0.698198	0.034	0.018	1	4
Galnt12	0.110841	-0.698143	0.195	0.233	1	4
Vegfb	0.786977	-0.698064	0.045	0.049	1	4
Srrd	0.826518	-0.697825	0.079	0.082	1	4
Wdr70	0.194246	-0.697445	0.229	0.258	1	4
Akr7a5	0.482744	-0.69697	0.042	0.053	1	4
Pcp4l1	0.359872	-0.696389	0.006	0.012	1	4
Mus81	0.781708	-0.696311	0.045	0.041	1	4
Parp14	0.0920959	-0.695865	0.195	0.237	1	4
Plin2	0.128129	-0.695777	0.062	0.09	1	4
Pnck	0.76458	-0.695718	0.014	0.012	1	4
Lmf1	0.631943	-0.695614	0.048	0.055	1	4
Zfp758	0.818649	-0.69511	0.048	0.051	1	4
Nudt15	0.68516	-0.695087	0.028	0.023	1	4
Flywch1	0.155211	-0.69496	0.042	0.065	1	4
Tmcc2	0.0700672	-0.694659	0.062	0.096	1	4
Plag1	0.0883543	-0.694164	0.054	0.084	1	4
H2-T24	0.83349	-0.694122	0.011	0.01	1	4
Cgrrf1	0.0593723	-0.693616	0.037	0.067	1	4
Pdcl	0.897954	-0.693353	0.068	0.068	1	4
Chsy3	0.333468	-0.693081	0.042	0.057	1	4
Ulk3	0.725094	-0.693005	0.025	0.029	1	4
Tgfbr3	0.866046	-0.692988	0.056	0.059	1	4
Bud23	0.150509	-0.692887	0.079	0.108	1	4
Sfxn5	0.730179	-0.692854	0.042	0.047	1	4
Tmem65	0.465611	-0.692812	0.11	0.123	1	4
Zfat	0.751697	-0.692788	0.076	0.08	1	4
Aamp	0.00698442	-0.692382	0.198	0.274	1	4
Decr1	0.202741	-0.691998	0.082	0.108	1	4
Retnlg	0.357251	-0.691193	0.006	0.012	1	4
Wdr48	0.969433	-0.691161	0.136	0.133	1	4
Nfatc2ip	0.786507	-0.69067	0.056	0.061	1	4
Brd8dc	0.124396	-0.690647	0.006	0.018	1	4
Naa50	0.973502	-0.69041	0.164	0.157	1	4
Fap	0.213749	-0.690149	0.037	0.055	1	4
Psmd9	0.970203	-0.68989	0.127	0.123	1	4
Nr1d2	0.0316889	-0.689889	0.11	0.162	1	4
Psmb9	0.000248318	-0.689754	0.342	0.436	1	4
Pogk	0.361469	-0.68938	0.062	0.078	1	4
Chmp1a	0.314976	-0.689326	0.133	0.155	1	4
Fbxo42	0.433558	-0.689076	0.136	0.153	1	4
Retreg2	0.40379	-0.688704	0.068	0.082	1	4
Xpo4	0.491362	-0.68854	0.127	0.141	1	4
Mpdz	0.603074	-0.687712	0.011	0.008	1	4
Phf19	0.56445	-0.687571	0.014	0.01	1	4
Cd9	0.0110324	-0.687307	0.243	0.313	1	4
Trib2	0.563026	-0.68729	0.034	0.041	1	4
Tspo	0.00338946	-0.686867	0.359	0.432	1	4
Ints11	0.0849065	-0.685656	0.076	0.11	1	4
Mrpl15	0.247277	-0.685235	0.141	0.168	1	4
Usf1	0.173408	-0.685194	0.158	0.194	1	4
Prox1	0.142972	-0.685156	0.011	0.025	1	4
Rmc1	0.60852	-0.685125	0.09	0.098	1	4
Ankrd42	0.0100396	-0.684889	0.011	0.041	1	4
Smim26	0.452214	-0.684877	0.09	0.074	1	4
Mybphl	0.503042	-0.684409	0.006	0.01	1	4
Rtraf	0.00109922	-0.682989	0.285	0.378	1	4
Gm20604	0.189866	-0.682972	0.011	0.023	1	4
Irf7	0.847692	-0.682381	0.062	0.065	1	4
Cndp2	0.217744	-0.682144	0.093	0.117	1	4
Tex30	0.873623	-0.682134	0.082	0.078	1	4
Cry2	0.941592	-0.681982	0.076	0.074	1	4
Cenps	0.442231	-0.68198	0.025	0.018	1	4
Vegfa	0.832595	-0.681869	0.209	0.204	1	4
Cd300a	0.435578	-0.67939	0.023	0.031	1	4
Tnf	0.00140108	-0.678784	0.178	0.268	1	4
Tmed4	0.301709	-0.678146	0.088	0.108	1	4
Cds1	0.472699	-0.677718	0.045	0.035	1	4
Polr1b	0.426218	-0.677644	0.04	0.029	1	4
Spg20	0.669969	-0.677634	0.045	0.051	1	4
Stra6l	0.332508	-0.677615	0.025	0.037	1	4
H2-T22	0.000437027	-0.677502	0.155	0.254	1	4
Dnajb13	0.358123	-0.677322	0.006	0.012	1	4
Tmem205	0.631432	-0.677311	0.048	0.055	1	4
Myc	0.765094	-0.67694	0.073	0.067	1	4
Dhx38	0.136709	-0.676585	0.073	0.102	1	4
Rela	0.0232606	-0.676547	0.215	0.28	1	4
Tom1	0.606138	-0.676356	0.071	0.08	1	4
Timmdc1	0.117675	-0.675753	0.076	0.108	1	4
Spata48	0.399648	-0.674969	0.042	0.031	1	4
Zfp831	0.856981	-0.674329	0.076	0.072	1	4
Ankrd24	0.917949	-0.674222	0.023	0.022	1	4
Pomt1	0.935125	-0.673607	0.017	0.018	1	4
Fgd3	0.987012	-0.673225	0.068	0.067	1	4
Ubtd2	0.907235	-0.673169	0.045	0.043	1	4
Bst1	0.258305	-0.672646	0.011	0.022	1	4
Thoc7	0.00656045	-0.672533	0.229	0.303	1	4
Pigg	0.989833	-0.67213	0.04	0.039	1	4
Nsun3	0.117051	-0.671787	0.048	0.074	1	4
Coq8b	0.0134599	-0.670828	0.04	0.082	1	4
Plekhn1	0.00280771	-0.670786	0.071	0.137	1	4
Zfand2b	0.471637	-0.670562	0.062	0.074	1	4
Hdac2	0.252132	-0.670296	0.11	0.135	1	4
Clec5a	0.841887	-0.670155	0.008	0.01	1	4
Pik3r6	0.367141	-0.670077	0.059	0.074	1	4
Dnajb5	0.124396	-0.669451	0.006	0.018	1	4
Ly96	0.0284936	-0.668951	0.099	0.149	1	4
Pwwp2b	0.687654	-0.668928	0.014	0.018	1	4
Frs2	0.0436687	-0.668523	0.209	0.266	1	4
Abcb8	0.78431	-0.668408	0.031	0.027	1	4
Mrpl32	0.0222633	-0.66811	0.153	0.209	1	4
Rbp1	0.641127	-0.667534	0.008	0.012	1	4
Eif4e3	0.670178	-0.667278	0.04	0.045	1	4
Ubash3a	0.68438	-0.667033	0.037	0.031	1	4
Psmc1	0.148782	-0.666502	0.11	0.145	1	4
Ttc39b	0.0658816	-0.666028	0.169	0.217	1	4
Fhl3	0.503617	-0.665818	0.017	0.023	1	4
Pafah1b3	0.0981783	-0.665595	0.13	0.17	1	4
Igf2r	0.502378	-0.66529	0.071	0.059	1	4
Oxa1l	0.0504985	-0.665195	0.085	0.125	1	4
Dok1	0.0166309	-0.66475	0.15	0.209	1	4
Med6	0.0257473	-0.664635	0.079	0.125	1	4
St14	0.133333	-0.664309	0.025	0.045	1	4
Zfr2	0.16464	-0.66422	0.051	0.074	1	4
Cox15	0.183306	-0.663458	0.045	0.067	1	4
Il1r2	0.822611	-0.663365	0.178	0.162	1	4
Sh3glb1	0.000451636	-0.663009	0.452	0.542	1	4
Lss	0.64462	-0.662846	0.023	0.027	1	4
Max	0.0946604	-0.662435	0.144	0.188	1	4
Slfn5	0.00948294	-0.662401	0.085	0.141	1	4
Kif3c	0.0613526	-0.662334	0.017	0.039	1	4
Kctd9	0.803342	-0.662062	0.059	0.063	1	4
Aven	0.116743	-0.661923	0.121	0.16	1	4
Mapk11	0.770952	-0.661735	0.017	0.02	1	4
Mre11a	0.701561	-0.661709	0.085	0.076	1	4
Pkib	0.0236265	-0.661508	0.085	0.135	1	4
Hgd	0.0614459	-0.661319	0.028	0.055	1	4
Myo3b	0.403113	-0.661131	0.048	0.061	1	4
Tuba1a	0.000758149	-0.661067	0.212	0.307	1	4
Zfp142	0.723752	-0.660893	0.059	0.065	1	4
Rbm15	0.211672	-0.660776	0.082	0.106	1	4
Sh3rf3	0.770025	-0.660733	0.014	0.012	1	4
Pygl	0.566976	-0.660578	0.113	0.123	1	4
2310039H08Rik	0.958522	-0.660548	0.096	0.094	1	4
Dpagt1	0.643223	-0.660306	0.031	0.037	1	4
Cd36	0.0984405	-0.660274	0.008	0.023	1	4
Ints1	0.380631	-0.660235	0.082	0.098	1	4
Ypel2	0.46209	-0.659751	0.068	0.08	1	4
Tmem268	0.311096	-0.659707	0.056	0.041	1	4
Aldh3a2	0.978111	-0.659597	0.071	0.07	1	4
Dstn	0.0528888	-0.659498	0.186	0.239	1	4
Ubxn1	0.0359928	-0.658922	0.305	0.346	1	4
Zfp346	0.233425	-0.658448	0.056	0.076	1	4
Cfap53	0.425401	-0.65844	0.071	0.084	1	4
Tfcp2	0.922152	-0.658077	0.048	0.049	1	4
Cx3cl1	0.106175	-0.658007	0.065	0.096	1	4
Pigx	0.325936	-0.657823	0.124	0.1	1	4
Ngdn	0.206077	-0.656502	0.167	0.196	1	4
Ints6l	0.960257	-0.655648	0.099	0.096	1	4
Tsc22d3	0.0198567	-0.655185	0.237	0.301	1	4
Palb2	0.294883	-0.654373	0.031	0.02	1	4
Rbbp9	0.853091	-0.65405	0.014	0.016	1	4
Psmg1	0.731796	-0.653667	0.048	0.053	1	4
Prep	0.619948	-0.653424	0.071	0.078	1	4
Setx	0.596867	-0.653025	0.243	0.249	1	4
Gm42715	0.450552	-0.652327	0.011	0.018	1	4
Metap1	0.598376	-0.652122	0.079	0.088	1	4
Zfp563	0.681434	-0.651637	0.028	0.023	1	4
Zfp740	0.956968	-0.651154	0.124	0.123	1	4
Capn11	0.599588	-0.651115	0.011	0.008	1	4
Slc25a27	0.248125	-0.650667	0.017	0.029	1	4
Haus4	0.208706	-0.650037	0.082	0.059	1	4
Twist1	0.549099	-0.649846	0.042	0.051	1	4
Supt5	0.0418165	-0.649312	0.212	0.268	1	4
D8Ertd738e	0.036626	-0.648757	0.359	0.409	1	4
Cd27	0.682034	-0.648735	0.093	0.1	1	4
Ccne2	0.579285	-0.648097	0.02	0.025	1	4
Nup35	0.969192	-0.647791	0.068	0.067	1	4
Clu	0.000268741	-0.647728	0.141	0.247	1	4
Pcyox1	0.028254	-0.647677	0.025	0.057	1	4
Sumf2	0.961629	-0.647591	0.048	0.047	1	4
Atp8b2	0.957711	-0.647192	0.054	0.053	1	4
Slc35a3	0.0163337	-0.647135	0.099	0.153	1	4
Zfp772	0.227739	-0.646309	0.003	0.01	1	4
Mov10	0.175502	-0.645443	0.056	0.08	1	4
Tdrp	0.768935	-0.645227	0.014	0.012	1	4
Fn1	0.358997	-0.645164	0.006	0.012	1	4
Dapl1	0.26004	-0.644375	0.037	0.023	1	4
Eif1ad	0.116624	-0.644283	0.121	0.155	1	4
Coa4	0.161635	-0.644209	0.048	0.07	1	4
Ctsb	0.00225073	-0.644179	0.229	0.315	1	4
9530077C05Rik	0.994489	-0.64399	0.02	0.02	1	4
Epsti1	0.000917786	-0.643512	0.483	0.568	1	4
Mmachc	0.845806	-0.643228	0.008	0.01	1	4
Gtf2a2	0.170313	-0.643057	0.229	0.262	1	4
Polm	0.286003	-0.642237	0.034	0.049	1	4
Ccl17	0.00104645	-0.6417	0.076	0.151	1	4
Oxsm	0.519872	-0.641065	0.031	0.023	1	4
Plpp5	0.545965	-0.640584	0.023	0.029	1	4
Timm44	0.462465	-0.640554	0.099	0.114	1	4
Ttc27	0.0215028	-0.640172	0.054	0.096	1	4
Fdx1	0.0729234	-0.639467	0.11	0.151	1	4
Raph1	0.417123	-0.63924	0.068	0.082	1	4
Cst7	0.556667	-0.639016	0.054	0.063	1	4
Eif3g	0.063792	-0.638952	0.234	0.284	1	4
Ndufb11	0.00208829	-0.63864	0.277	0.366	1	4
Dnajb9	0.0755658	-0.637755	0.311	0.36	1	4
Hadha	0.0449177	-0.637692	0.153	0.205	1	4
Prr14	0.0557184	-0.637284	0.223	0.272	1	4
Slc30a1	0.0224866	-0.637155	0.037	0.074	1	4
Tmem231	0.143287	-0.637139	0.011	0.025	1	4
Mpv17l	0.964825	-0.636903	0.031	0.031	1	4
Tmf1	0.534145	-0.636899	0.184	0.196	1	4
Hs3st3b1	0.876263	-0.636369	0.051	0.053	1	4
Hipk1	0.191494	-0.636115	0.212	0.245	1	4
Fam149b	0.405825	-0.635993	0.068	0.082	1	4
Cep128	0.381855	-0.635733	0.133	0.153	1	4
Cnnm2	0.910517	-0.635708	0.096	0.096	1	4
Tfpi	0.878725	-0.635691	0.017	0.016	1	4
Mycl	0.76027	-0.634472	0.04	0.035	1	4
Tbx21	0.716027	-0.634306	0.042	0.037	1	4
Ccl19	0.0282797	-0.634188	0.065	0.108	1	4
Arl5a	0.00929481	-0.633915	0.229	0.295	1	4
Gucy2c	0.767845	-0.633793	0.014	0.012	1	4
Amdhd2	0.968173	-0.633255	0.085	0.084	1	4
Actr5	0.961985	-0.632664	0.085	0.082	1	4
Tmem134	0.0103537	-0.631964	0.257	0.329	1	4
Irf8	0.00266815	-0.631801	0.198	0.286	1	4
Lekr1	0.176361	-0.631763	0.006	0.016	1	4
Rps6ka4	0.937077	-0.631397	0.042	0.043	1	4
Cdkn2aipnl	0.123288	-0.63133	0.054	0.08	1	4
Aldh9a1	0.572745	-0.630956	0.085	0.094	1	4
Fam104a	0.012022	-0.630938	0.198	0.268	1	4
Rftn2	0.547021	-0.630929	0.014	0.02	1	4
Npl	0.760775	-0.63063	0.011	0.014	1	4
Sec23b	0.779935	-0.629697	0.116	0.108	1	4
Ppard	0.382523	-0.62952	0.13	0.108	1	4
Sh3d19	0.500764	-0.62825	0.017	0.023	1	4
Slamf1	0.00590488	-0.628186	0.045	0.096	1	4
Cdc25a	0.865149	-0.628121	0.025	0.027	1	4
Castor1	0.97303	-0.628049	0.054	0.053	1	4
Hibch	0.477429	-0.627885	0.054	0.065	1	4
Pptc7	0.270993	-0.627549	0.124	0.147	1	4
Cfap36	0.204006	-0.62754	0.11	0.137	1	4
Gm7247	0.961319	-0.627474	0.014	0.014	1	4
Pabpc4	0.538351	-0.626918	0.192	0.204	1	4
Mgat3	0.831033	-0.626681	0.011	0.01	1	4
Amotl1	0.626681	-0.626616	0.051	0.043	1	4
Bank1	0.338852	-0.626367	0.025	0.037	1	4
Arl10	0.437521	-0.626362	0.045	0.057	1	4
Trabd	0.847252	-0.62634	0.107	0.11	1	4
Dennd10	0.515261	-0.626257	0.073	0.084	1	4
Siah1a	0.319179	-0.62607	0.136	0.157	1	4
Ccdc93	0.733985	-0.626049	0.048	0.053	1	4
Mib2	0.0454625	-0.625654	0.04	0.072	1	4
Il17re	0.656805	-0.625649	0.02	0.016	1	4
Zfp217	0.0424656	-0.625534	0.192	0.245	1	4
Psrc1	0.340015	-0.625469	0.011	0.02	1	4
Rbmx2	0.833876	-0.624668	0.062	0.065	1	4
Cactin	0.844849	-0.624526	0.071	0.067	1	4
Zfp369	0.824074	-0.624453	0.073	0.068	1	4
Mgme1	0.284643	-0.624157	0.031	0.045	1	4
Slc12a7	0.897075	-0.623497	0.065	0.067	1	4
Etv3l	0.381674	-0.622963	0.011	0.006	1	4
Tppp3	0.711715	-0.621712	0.02	0.023	1	4
Cd300lb	0.252604	-0.620909	0.006	0.014	1	4
H2-T23	4.1563e-05	-0.620864	0.412	0.511	0.687867	4
Nceh1	0.0332646	-0.620856	0.082	0.127	1	4
Tceanc	0.940967	-0.620672	0.017	0.018	1	4
Zdhhc5	0.746431	-0.620625	0.093	0.098	1	4
Idh3a	0.746149	-0.62033	0.096	0.088	1	4
Lyz1	0.179248	-0.620218	0.006	0.016	1	4
Ints9	0.128366	-0.619515	0.073	0.104	1	4
Lrp12	0.668453	-0.619499	0.04	0.045	1	4
Chtop	0.326151	-0.619277	0.172	0.198	1	4
Kat2a	0.260795	-0.619273	0.025	0.039	1	4
Dus1l	0.684167	-0.619159	0.056	0.063	1	4
Fbxo7	0.0225079	-0.619142	0.113	0.168	1	4
Dnase1l1	0.0150554	-0.619042	0.088	0.143	1	4
Slc4a7	0.135991	-0.618727	0.195	0.235	1	4
Pdss1	0.954661	-0.618559	0.056	0.055	1	4
Vrk3	0.0452915	-0.618303	0.11	0.155	1	4
Adnp	0.641267	-0.618158	0.059	0.067	1	4
E2f4	0.476433	-0.618095	0.105	0.088	1	4
Hmox2	0.00688165	-0.618066	0.144	0.213	1	4
Eif4enif1	0.368845	-0.617811	0.138	0.157	1	4
Polh	0.237815	-0.61764	0.02	0.033	1	4
Pfdn6	0.10488	-0.617577	0.167	0.207	1	4
Snapin	0.996833	-0.617254	0.088	0.086	1	4
Atg12	0.539963	-0.617199	0.153	0.164	1	4
Irgq	0.706721	-0.617117	0.017	0.014	1	4
Immp1l	0.0708794	-0.616964	0.195	0.245	1	4
Gm45844	0.102796	-0.616837	0.011	0.027	1	4
Gpr137b	0.00393867	-0.615714	0.172	0.256	1	4
Nupr1	0.0202462	-0.615275	0.02	0.051	1	4
Atg9a	0.136202	-0.614669	0.025	0.045	1	4
Dgke	0.777484	-0.614504	0.062	0.067	1	4
Chmp1b2	0.321862	-0.614371	0.065	0.082	1	4
Mea1	0.875643	-0.613568	0.096	0.098	1	4
Tmtc3	0.412596	-0.613566	0.048	0.061	1	4
Zfp874a	0.840227	-0.613544	0.025	0.027	1	4
Ogfod1	0.122558	-0.613521	0.056	0.084	1	4
Utp15	0.525243	-0.613329	0.056	0.067	1	4
Slc35b2	0.889729	-0.613329	0.127	0.121	1	4
Xrcc4	0.145688	-0.613151	0.175	0.209	1	4
Tmem63a	0.699177	-0.612909	0.04	0.045	1	4
Arpin	0.0624548	-0.612886	0.056	0.09	1	4
Mx2	0.839845	-0.612831	0.048	0.051	1	4
Htatsf1	0.547178	-0.612749	0.119	0.129	1	4
Pigz	0.302606	-0.612554	0.02	0.031	1	4
Tmem39b	0.827846	-0.612195	0.042	0.045	1	4
Polrmt	0.780648	-0.612169	0.031	0.027	1	4
Golga7	0.0766737	-0.612149	0.133	0.174	1	4
Mfn2	0.303332	-0.612109	0.062	0.08	1	4
Sh3bgrl	0.181477	-0.611682	0.237	0.274	1	4
Clcn7	0.987404	-0.611568	0.085	0.084	1	4
Lsmem2	0.588984	-0.611291	0.011	0.016	1	4
Fam122b	0.439598	-0.61112	0.023	0.031	1	4
Dok6	0.179272	-0.611077	0.048	0.07	1	4
Gon4l	0.118869	-0.610762	0.209	0.249	1	4
Ggct	0.632	-0.610341	0.031	0.037	1	4
Tnfsf12	0.769138	-0.610216	0.017	0.02	1	4
Emc4	0.075073	-0.610032	0.082	0.117	1	4
Stx11	0.00549017	-0.609842	0.229	0.313	1	4
Pank3	0.362746	-0.60981	0.076	0.094	1	4
Ophn1	0.0623975	-0.609045	0.017	0.039	1	4
Ccdc28a	0.572961	-0.608965	0.071	0.08	1	4
Tmem150b	0.639135	-0.608763	0.042	0.049	1	4
Iws1	0.362673	-0.608516	0.223	0.245	1	4
Wbp1l	0.570966	-0.608178	0.161	0.172	1	4
Tmem143	0.256551	-0.607639	0.008	0.018	1	4
Art3	0.219643	-0.607618	0.02	0.01	1	4
Eif3b	0.519156	-0.607615	0.155	0.168	1	4
Npr2	0.0976947	-0.607169	0.008	0.023	1	4
Dmac2	0.32313	-0.606899	0.096	0.115	1	4
Mgat4b	0.18122	-0.606651	0.153	0.184	1	4
Nacc1	0.448864	-0.606351	0.082	0.096	1	4
Pqlc3	0.395045	-0.606243	0.068	0.082	1	4
Arhgef10l	0.627805	-0.606025	0.037	0.043	1	4
Galm	0.547021	-0.605987	0.014	0.02	1	4
Cog4	0.054866	-0.605614	0.153	0.202	1	4
Tada2b	0.491319	-0.603995	0.025	0.033	1	4
Mcm2	0.635732	-0.603642	0.031	0.037	1	4
Gtpbp2	0.00279283	-0.603062	0.192	0.276	1	4
Brk1	0.0211749	-0.602956	0.379	0.434	1	4
H2-M3	0.00775017	-0.602834	0.192	0.268	1	4
Ripk2	0.0304026	-0.602726	0.164	0.221	1	4
Heatr3	0.997444	-0.602516	0.054	0.053	1	4
Khdc1a	0.221703	-0.602497	0.02	0.01	1	4
Naprt	0.472731	-0.601942	0.023	0.016	1	4
Kdelr2	0.261375	-0.601737	0.093	0.115	1	4
Phf11b	0.0603005	-0.601468	0.13	0.178	1	4
Psmb10	0.00150914	-0.601386	0.251	0.352	1	4
Car5b	0.666567	-0.600986	0.02	0.016	1	4
Sgsm3	0.537125	-0.600224	0.028	0.022	1	4
2410002F23Rik	0.355309	-0.60011	0.107	0.125	1	4
H2ac25	0.0144554	-0.600071	0.088	0.143	1	4
Ythdf1	0.288013	-0.600067	0.099	0.121	1	4
Prkcg	0.371277	-0.599904	0.054	0.041	1	4
Pdhb	0.92242	-0.599758	0.175	0.17	1	4
Prnp	0.105838	-0.599186	0.164	0.205	1	4
Sp110	0.199388	-0.599106	0.24	0.27	1	4
Med24	0.627743	-0.598999	0.059	0.067	1	4
Ndrg1	0.0868154	-0.598966	0.133	0.176	1	4
Nup62	0.241113	-0.598768	0.079	0.1	1	4
Tfdp1	0.33049	-0.59804	0.09	0.11	1	4
Rprd1b	0.621982	-0.597139	0.113	0.123	1	4
Gm3512	0.941016	-0.596749	0.011	0.012	1	4
Map2k7	0.968929	-0.596348	0.062	0.061	1	4
Rasal3	0.550294	-0.596177	0.085	0.096	1	4
Hprt	0.091199	-0.595574	0.203	0.25	1	4
Rarg	0.0636912	-0.595394	0.096	0.137	1	4
Tlr2	0.03553	-0.595057	0.037	0.07	1	4
Cntrob	0.585757	-0.59482	0.034	0.041	1	4
Cyth2	0.0938345	-0.594773	0.076	0.11	1	4
Znhit3	0.0279229	-0.594376	0.028	0.061	1	4
Scp2	0.00944812	-0.59423	0.308	0.376	1	4
Abcf3	0.236063	-0.594029	0.059	0.08	1	4
Zfp41	0.971121	-0.593729	0.014	0.014	1	4
Nek3	0.88672	-0.593441	0.017	0.016	1	4
Gpr157	0.358755	-0.592471	0.082	0.1	1	4
Irgm2	0.714024	-0.592325	0.051	0.045	1	4
Fam110b	0.823118	-0.591988	0.02	0.018	1	4
Utp25	0.124977	-0.591724	0.068	0.043	1	4
Ankrd35	0.0381947	-0.591557	0.105	0.153	1	4
Mllt1	0.0439372	-0.591315	0.059	0.098	1	4
Bdh1	0.210686	-0.590012	0.025	0.014	1	4
Sbsn	0.473161	-0.589359	0.02	0.027	1	4
Irf3	0.0135759	-0.589284	0.127	0.19	1	4
Vps50	0.386321	-0.58928	0.107	0.123	1	4
Sspo	0.163501	-0.588944	0.15	0.184	1	4
Togaram2	0.960231	-0.588921	0.014	0.014	1	4
Pmpca	0.635277	-0.588758	0.096	0.084	1	4
Tsen2	0.676232	-0.588605	0.028	0.023	1	4
Mtmr7	0.772766	-0.588472	0.017	0.02	1	4
Ring1	0.918068	-0.588152	0.088	0.088	1	4
Fbh1	0.245449	-0.587778	0.088	0.112	1	4
Selenop	0.754368	-0.58761	0.082	0.086	1	4
Apbb2	0.0293083	-0.587523	0.079	0.125	1	4
Ints10	0.461744	-0.586725	0.051	0.063	1	4
Ing1	0.341641	-0.586545	0.133	0.155	1	4
Them6	0.65663	-0.586409	0.042	0.049	1	4
Grn	0.596825	-0.585664	0.127	0.135	1	4
Gusb	0.172339	-0.58522	0.124	0.155	1	4
Sqle	0.712404	-0.585103	0.059	0.065	1	4
Rasl11b	0.314429	-0.584889	0.028	0.041	1	4
Rtp4	0.730207	-0.584581	0.025	0.029	1	4
Zfp467	0.886592	-0.584225	0.085	0.088	1	4
Ess2	0.716154	-0.583644	0.076	0.068	1	4
Sertad3	0.268024	-0.583343	0.051	0.068	1	4
Sec13	0.197207	-0.58237	0.093	0.121	1	4
Capn3	0.50418	-0.582212	0.006	0.01	1	4
Exd1	0.0254331	-0.581765	0.008	0.031	1	4
Nfkbil1	0.0680952	-0.581763	0.073	0.11	1	4
Errfi1	0.517066	-0.580942	0.26	0.268	1	4
Mrpl18	0.578155	-0.580939	0.201	0.213	1	4
Pla2g12a	0.140368	-0.580885	0.034	0.055	1	4
Ercc6l	0.259426	-0.580382	0.008	0.018	1	4
H2az2	0.00969194	-0.580174	0.246	0.323	1	4
Ak6	0.986226	-0.579995	0.082	0.08	1	4
Ints15	0.851278	-0.579958	0.048	0.045	1	4
Gstt2	0.0666886	-0.579107	0.085	0.123	1	4
Golph3l	0.0345339	-0.578993	0.141	0.196	1	4
Dlg4	0.971417	-0.57868	0.031	0.031	1	4
Lnpep	0.00561428	-0.578093	0.336	0.423	1	4
Emp2	0.697953	-0.577555	0.02	0.023	1	4
Sorbs1	0.29536	-0.577306	0.076	0.096	1	4
Cd5	0.579893	-0.576671	0.056	0.047	1	4
Lamtor1	0.699955	-0.575988	0.192	0.196	1	4
Ssrp1	0.499677	-0.574621	0.181	0.196	1	4
Tbc1d20	0.397993	-0.574209	0.158	0.176	1	4
Apol7c	0.00497943	-0.573995	0.314	0.399	1	4
Bloc1s3	0.382039	-0.573683	0.037	0.049	1	4
Zbtb7b	0.123959	-0.573439	0.028	0.049	1	4
Armcx2	0.904731	-0.572949	0.028	0.029	1	4
Dcp1b	0.300658	-0.572877	0.048	0.065	1	4
Zfp219	0.106776	-0.572858	0.051	0.078	1	4
Stard3nl	0.23181	-0.572795	0.076	0.1	1	4
Crocc	0.253332	-0.572657	0.014	0.025	1	4
Pcsk7	0.602717	-0.572088	0.141	0.125	1	4
Tnnt2	0.298434	-0.571978	0.02	0.031	1	4
Tmem276	0.285049	-0.571825	0.023	0.035	1	4
Alkbh8	0.503273	-0.571534	0.062	0.051	1	4
Harbi1	0.382352	-0.570577	0.028	0.039	1	4
[truncated: 8,137 more rows]

## Sheet: WT naïve vs WT ECTV clu6 pDCs
	p_val	avg_log2FC	pct.1	pct.2	p_val_adj	cluster			high in naïve WT (-)	high in WT ECTV 1 dpi (+)
Adgre4	0.581586	-4.61181	0.011	0.005	1	6	0.235386
Smpdl3b	0.153422	-4.44561	0	0.011	1	6	0.814113
Emilin2	0.302573	-4.15116	0.005	0.016	1	6	0.51917
Heatr9	0.0232161	-3.89338	0	0.027	1	6	1.63421
Gjc1	0.0797265	-3.85378	0	0.016	1	6	1.0984
Scrn3	0.00122304	-3.62591	0	0.054	1	6	2.91256
B230217C12Rik	0.00706473	-3.55373	0	0.038	1	6	2.1509
Klk1b5	0.0426662	-3.44826	0	0.022	1	6	1.36992
Cdh13	0.153422	-3.33773	0	0.011	1	6	0.814113
Negr1	0.0232161	-3.23721	0	0.027	1	6	1.63421
Apol7c	0.145317	-3.14917	0.011	0.032	1	6	0.837685
Aldh6a1	0.00164726	-3.06556	0.005	0.065	1	6	2.78324
Macc1	0.0797265	-2.96069	0	0.016	1	6	1.0984
Fer	0.637438	-2.93542	0.011	0.016	1	6	0.195562
Pdgfb	0.0496055	-2.89029	0.011	0.043	1	6	1.30447
Dpyd	0.0797265	-2.84922	0	0.016	1	6	1.0984
Gpnmb	0.00546508	-2.82563	0.005	0.054	1	6	2.2624
Tspan17	0.153422	-2.81759	0	0.011	1	6	0.814113
Slc26a8	0.0426662	-2.76269	0	0.022	1	6	1.36992
Msl3l2	0.00706473	-2.7601	0	0.038	1	6	2.1509
Sez6l2	0.0426662	-2.73234	0	0.022	1	6	1.36992
Ctnna3	0.0797265	-2.71195	0	0.016	1	6	1.0984
Erc2	0.153422	-2.70914	0	0.011	1	6	0.814113
Tnip3	0.0797265	-2.70757	0	0.016	1	6	1.0984
Amacr	0.012764	-2.67326	0	0.032	1	6	1.89401
Gnao1	0.153422	-2.64051	0	0.011	1	6	0.814113
Pkd1l2	0.153422	-2.6361	0	0.011	1	6	0.814113
Flywch2	0.012764	-2.62294	0	0.032	1	6	1.89401
Ehf	0.627172	-2.61419	0.011	0.016	1	6	0.202613
Dthd1	0.0797265	-2.60328	0	0.016	1	6	1.0984
Pnp2	0.0232161	-2.56625	0	0.027	1	6	1.63421
Lipc	0.0797265	-2.55284	0	0.016	1	6	1.0984
Gm28539	0.144265	-2.54971	0.011	0.032	1	6	0.84084
Ccdc60	0.552237	-2.54784	0.005	0.011	1	6	0.257875
Thsd1	0.548104	-2.52367	0.005	0.011	1	6	0.261137
Pglyrp1	0.0651948	-2.52064	0.037	0.081	1	6	1.18579
1190005I06Rik	0.051905	-2.48328	0.005	0.032	1	6	1.28479
Zfp821	0.627172	-2.47361	0.011	0.016	1	6	0.202613
H2-M2	0.387699	-2.47036	0.011	0.022	1	6	0.411506
Slc2a12	0.548104	-2.46577	0.005	0.011	1	6	0.261137
Lrrc74b	0.0426662	-2.42336	0	0.022	1	6	1.36992
Plp1	0.0797265	-2.42283	0	0.016	1	6	1.0984
Lonrf3	0.0426662	-2.40706	0	0.022	1	6	1.36992
Fancg	0.040953	-2.40505	0.016	0.054	1	6	1.38771
Lyplal1	0.0232161	-2.38306	0	0.027	1	6	1.63421
Egfl8	0.153422	-2.37101	0	0.011	1	6	0.814113
Fabp3	0.0426662	-2.37064	0	0.022	1	6	1.36992
Fbxl7	0.552237	-2.36261	0.005	0.011	1	6	0.257875
Npnt	0.0957028	-2.3543	0.005	0.027	1	6	1.01908
Inca1	0.0426662	-2.35381	0	0.022	1	6	1.36992
Impg1	0.0426662	-2.35125	0	0.022	1	6	1.36992
Lrrc36	0.153422	-2.33596	0	0.011	1	6	0.814113
Il5ra	0.677643	-2.33334	0.016	0.022	1	6	0.168999
Klrc2	0.0862726	-2.33189	0.011	0.038	1	6	1.06413
Adamts14	0.0426662	-2.3154	0	0.022	1	6	1.36992
Ptchd1	0.0931051	-2.30892	0.005	0.027	1	6	1.03103
Cntnap5b	0.153422	-2.30497	0	0.011	1	6	0.814113
Styk1	0.302573	-2.30052	0.005	0.016	1	6	0.51917
Stard6	0.0290021	-2.29766	0.005	0.038	1	6	1.53757
Ltb4r1	0.0523984	-2.28692	0.005	0.032	1	6	1.28068
Adgrb2	0.0426662	-2.28396	0	0.022	1	6	1.36992
Dgkh	0.0172145	-2.28351	0.005	0.043	1	6	1.76411
Lrig1	0.246949	-2.27843	0.026	0.049	1	6	0.607393
Nckap1	0.0245331	-2.27271	0.016	0.059	1	6	1.61025
Suox	0.141144	-2.26901	0.011	0.032	1	6	0.850337
Adcy2	0.0797265	-2.26408	0	0.016	1	6	1.0984
Nlrc4	0.302573	-2.26257	0.005	0.016	1	6	0.51917
Itm2a	0.0586458	-2.26216	0.037	0.081	1	6	1.23176
Gnaz	0.630586	-2.25098	0.011	0.016	1	6	0.200256
A3galt2	0.0797265	-2.2495	0	0.016	1	6	1.0984
Aox4	0.390119	-2.24824	0.011	0.022	1	6	0.408803
Chrm3	0.0797265	-2.24292	0	0.016	1	6	1.0984
Lcn4	0.0426662	-2.22802	0	0.022	1	6	1.36992
Ccno	0.0797265	-2.22648	0	0.016	1	6	1.0984
Prkg1	0.149569	-2.22473	0.021	0.049	1	6	0.825157
Calml3	0.0797265	-2.22293	0	0.016	1	6	1.0984
Cx3cl1	0.0797265	-2.22013	0	0.016	1	6	1.0984
Pipox	0.0797265	-2.21634	0	0.016	1	6	1.0984
Phf24	0.0426662	-2.2069	0	0.022	1	6	1.36992
Insm1	0.0797265	-2.20656	0	0.016	1	6	1.0984
Kcnk3	0.0931051	-2.19877	0.005	0.027	1	6	1.03103
Lrrc24	0.0797265	-2.19592	0	0.016	1	6	1.0984
Nap1l5	0.153422	-2.19233	0	0.011	1	6	0.814113
Bend3	0.0167332	-2.18566	0.011	0.054	1	6	1.77642
Hes1	0.668719	-2.17886	0.016	0.022	1	6	0.174757
Dram1	0.0426662	-2.16765	0	0.022	1	6	1.36992
Cd80	0.181828	-2.16623	0.016	0.038	1	6	0.740338
Cpe	0.0426662	-2.14576	0	0.022	1	6	1.36992
Svip	0.305098	-2.14441	0.005	0.016	1	6	0.515561
Ttn	0.931328	-2.13861	0.032	0.032	1	6	0.0308975
Qrfp	0.0797265	-2.1383	0	0.016	1	6	1.0984
Ptgr1	0.010301	-2.13458	0.011	0.059	1	6	1.98712
Ttc21b	0.0691407	-2.13442	0.016	0.049	1	6	1.16027
Ablim2	0.548104	-2.12726	0.005	0.011	1	6	0.261137
Stxbp4	0.520619	-2.12566	0.026	0.038	1	6	0.28348
Cdh11	0.153422	-2.12534	0	0.011	1	6	0.814113
Prdm16	0.0426662	-2.11989	0	0.022	1	6	1.36992
Ccl19	0.305098	-2.11819	0.005	0.016	1	6	0.515561
Rhbdl3	0.0426662	-2.11556	0	0.022	1	6	1.36992
Cacnb3	0.0496055	-2.11529	0.011	0.043	1	6	1.30447
Cdh4	0.153422	-2.11438	0	0.011	1	6	0.814113
Xlr3a	0.0797265	-2.11326	0	0.016	1	6	1.0984
Prune2	0.167528	-2.10996	0.005	0.022	1	6	0.775912
Phlda3	0.0797265	-2.10786	0	0.016	1	6	1.0984
Klrc1	0.0696214	-2.10435	0.016	0.049	1	6	1.15726
Tomt	0.0424653	-2.0927	0.016	0.054	1	6	1.37197
Zfp449	0.0170211	-2.08396	0.011	0.054	1	6	1.76901
Mutyh	0.0931051	-2.07831	0.005	0.027	1	6	1.03103
Gpr150	0.0797265	-2.07808	0	0.016	1	6	1.0984
H2bc3	0.0797265	-2.06891	0	0.016	1	6	1.0984
Apcdd1	0.0957028	-2.06719	0.005	0.027	1	6	1.01908
Myo5b	0.0307298	-2.06541	0.005	0.038	1	6	1.51244
Nexmif	0.0426662	-2.06539	0	0.022	1	6	1.36992
1700102P08Rik	0.167528	-2.05487	0.005	0.022	1	6	0.775912
Egfem1	0.118203	-2.05198	0.016	0.043	1	6	0.927373
Socs2	0.188642	-2.05118	0.016	0.038	1	6	0.724361
Ccl5	0.111521	-2.05108	0.228	0.286	1	6	0.952645
Ncapd2	0.0101233	-2.04391	0.011	0.059	1	6	1.99468
Hmgcs2	0.0428791	-2.03949	0.026	0.07	1	6	1.36775
Calm4	0.387699	-2.03654	0.011	0.022	1	6	0.411506
C1qb	0.0797265	-2.03229	0	0.016	1	6	1.0984
Gab1	0.153422	-2.02372	0	0.011	1	6	0.814113
Uhrf1	0.0797265	-2.02254	0	0.016	1	6	1.0984
Bcl2a1b	0.212402	-2.0225	0.037	0.065	1	6	0.672841
Col17a1	0.0106647	-2.01988	0.011	0.059	1	6	1.97205
Egr2	0.242157	-2.01429	0.011	0.027	1	6	0.615903
Cyp11a1	0.679185	-2.01354	0.016	0.011	1	6	0.168012
Tnfsf11	0.167528	-2.00959	0.005	0.022	1	6	0.775912
Ctsf	0.153422	-2.00885	0	0.011	1	6	0.814113
Rbfox1	0.0797265	-1.99831	0	0.016	1	6	1.0984
Nt5el	0.0797265	-1.99553	0	0.016	1	6	1.0984
Lpcat4	0.0931051	-1.98784	0.005	0.027	1	6	1.03103
Slc24a2	0.302573	-1.98518	0.005	0.016	1	6	0.51917
Nrg1	0.0582313	-1.98016	0.021	0.059	1	6	1.23484
Colec12	0.548104	-1.97646	0.005	0.011	1	6	0.261137
Mfap3l	0.169013	-1.97398	0.005	0.022	1	6	0.772079
Utf1	0.0797265	-1.97314	0	0.016	1	6	1.0984
Tbc1d25	0.027862	-1.96531	0.016	0.059	1	6	1.55499
Cand2	0.0171667	-1.95893	0.011	0.054	1	6	1.76531
Mtrr	0.010276	-1.95837	0.032	0.097	1	6	1.98818
Nup62cl	0.153422	-1.95821	0	0.011	1	6	0.814113
Rapgef4	0.0500044	-1.956	0.011	0.043	1	6	1.30099
Arfgef3	0.0797265	-1.94652	0	0.016	1	6	1.0984
Klhl20	0.92627	-1.94203	0.095	0.097	1	6	0.0332623
Gm8773	0.153422	-1.9382	0	0.011	1	6	0.814113
Piwil4	0.153422	-1.93645	0	0.011	1	6	0.814113
Nectin1	0.302573	-1.93402	0.005	0.016	1	6	0.51917
Ift81	0.0298552	-1.92706	0.005	0.038	1	6	1.52498
Kcnip2	0.548104	-1.92355	0.005	0.011	1	6	0.261137
Batf2	0.0797265	-1.92318	0	0.016	1	6	1.0984
Gm28044	0.0797265	-1.91836	0	0.016	1	6	1.0984
Ntrk3	0.0965815	-1.91469	0.005	0.027	1	6	1.01511
Utp14b	0.083664	-1.91458	0.011	0.038	1	6	1.07746
Slc12a2	0.0830219	-1.91397	0.011	0.038	1	6	1.08081
Runx1t1	0.302573	-1.912	0.005	0.016	1	6	0.51917
Syt1	0.170509	-1.91093	0.005	0.022	1	6	0.768254
Klhl4	0.153422	-1.90854	0	0.011	1	6	0.814113
Hspg2	0.552237	-1.90844	0.005	0.011	1	6	0.257875
Rbm11	0.0797265	-1.90192	0	0.016	1	6	1.0984
Pigl	0.00692991	-1.89465	0.026	0.092	1	6	2.15927
Dusp8	0.0426662	-1.89423	0	0.022	1	6	1.36992
Zfp46	0.392548	-1.88383	0.011	0.022	1	6	0.406108
Rhebl1	0.0492093	-1.88021	0.011	0.043	1	6	1.30795
Serpinb9	0.0161223	-1.87794	0.016	0.065	1	6	1.79257
Kyat1	0.169013	-1.87589	0.005	0.022	1	6	0.772079
Itga5	0.144265	-1.87472	0.011	0.032	1	6	0.84084
Marchf8	0.118974	-1.87407	0.016	0.043	1	6	0.924548
Lig4	0.0797265	-1.86838	0	0.016	1	6	1.0984
Tgtp1	0.170509	-1.86617	0.005	0.022	1	6	0.768254
Or13a27	0.548104	-1.86383	0.005	0.011	1	6	0.261137
Gm15155	0.153422	-1.8616	0	0.011	1	6	0.814113
Nipal1	0.0426662	-1.86074	0	0.022	1	6	1.36992
Grm7	0.108602	-1.86058	0.026	0.005	1	6	0.964164
Ostn	0.153422	-1.85853	0	0.011	1	6	0.814113
Phf11d	0.0948305	-1.85606	0.005	0.027	1	6	1.02305
Dlg4	0.324532	-1.85549	0.042	0.065	1	6	0.488742
Zfp972	0.581586	-1.85458	0.011	0.005	1	6	0.235386
Mpz	0.627172	-1.85451	0.011	0.016	1	6	0.202613
Pcdh1	0.0797265	-1.84964	0	0.016	1	6	1.0984
Iho1	0.302573	-1.84568	0.005	0.016	1	6	0.51917
Fosl2	0.173011	-1.8433	0.048	0.081	1	6	0.761926
1700025G04Rik	0.0301464	-1.84093	0.058	0.119	1	6	1.52077
Prf1	0.3333	-1.83953	0.021	0.038	1	6	0.477165
Ramp3	0.417308	-1.83858	0.037	0.054	1	6	0.379543
Grin3b	0.153422	-1.83681	0	0.011	1	6	0.814113
Tctn3	0.432692	-1.83639	0.037	0.054	1	6	0.363821
Cep170b	0.143219	-1.83372	0.011	0.032	1	6	0.844
Cdo1	0.153422	-1.83324	0	0.011	1	6	0.814113
Chrnb2	0.153422	-1.83034	0	0.011	1	6	0.814113
Kcnq3	0.153422	-1.82933	0	0.011	1	6	0.814113
Nlgn1	0.153422	-1.82456	0	0.011	1	6	0.814113
4930519G04Rik	0.0797265	-1.82321	0	0.016	1	6	1.0984
Klf12	0.0157534	-1.81722	0.016	0.065	1	6	1.80263
Kcnab1	0.153422	-1.81349	0	0.011	1	6	0.814113
Slc12a8	0.0931051	-1.81256	0.005	0.027	1	6	1.03103
Klc4	0.140116	-1.81037	0.011	0.032	1	6	0.853514
Ttc16	0.153422	-1.80103	0	0.011	1	6	0.814113
Myo3b	0.0294919	-1.80091	0.011	0.049	1	6	1.5303
Klrb1c	0.71187	-1.78891	0.026	0.032	1	6	0.147599
Atp9a	0.0797265	-1.7843	0	0.016	1	6	1.0984
Dnaaf1	0.153422	-1.78092	0	0.011	1	6	0.814113
Dynlt2a3	0.153422	-1.77887	0	0.011	1	6	0.814113
Bicdl1	0.351564	-1.77605	0.026	0.043	1	6	0.453996
Gm6710	0.0106647	-1.76867	0.011	0.059	1	6	1.97205
Pcolce	0.153422	-1.76749	0	0.011	1	6	0.814113
Gm2296	0.0539024	-1.76738	0.005	0.032	1	6	1.26839
Ppil6	0.0814624	-1.76008	0.032	0.07	1	6	1.08904
Tlr6	0.0939646	-1.74683	0.005	0.027	1	6	1.02704
Gm20521	0.302573	-1.74462	0.005	0.016	1	6	0.51917
Hes5	0.153422	-1.74396	0	0.011	1	6	0.814113
Gucy1a2	0.153422	-1.74353	0	0.011	1	6	0.814113
Myc	0.194917	-1.74258	0.032	0.059	1	6	0.71015
Camkv	0.548104	-1.74045	0.005	0.011	1	6	0.261137
Eno3	0.0718932	-1.73689	0.026	0.065	1	6	1.14331
Cdcp1	0.153422	-1.73361	0	0.011	1	6	0.814113
Sfta2	0.221074	-1.73303	0.021	0.043	1	6	0.655463
Tle6	0.153422	-1.72811	0	0.011	1	6	0.814113
Spaca7b	0.0797265	-1.72717	0	0.016	1	6	1.0984
Bcl2l2	0.0502511	-1.72115	0.042	0.092	1	6	1.29885
Bambi	0.82816	-1.717	0.037	0.032	1	6	0.0818859
Cxadr	0.0948305	-1.71418	0.005	0.027	1	6	1.02305
Pcp4l1	0.153422	-1.71088	0	0.011	1	6	0.814113
ENSMUSG00000095500	0.167528	-1.71063	0.005	0.022	1	6	0.775912
Sgsm1	0.153422	-1.70624	0	0.011	1	6	0.814113
Ddn	0.153422	-1.70188	0	0.011	1	6	0.814113
Nrxn1	0.0173837	-1.69736	0.005	0.043	1	6	1.75986
Zfp768	0.0544117	-1.6968	0.005	0.032	1	6	1.26431
Fam171a1	0.144265	-1.69638	0.011	0.032	1	6	0.84084
Nlrp1a	0.153422	-1.69494	0	0.011	1	6	0.814113
Arsg	0.167528	-1.69317	0.005	0.022	1	6	0.775912
Cdh2	0.0307298	-1.69079	0.005	0.038	1	6	1.51244
1110032F04Rik	0.153422	-1.68629	0	0.011	1	6	0.814113
Rhod	0.153422	-1.68623	0	0.011	1	6	0.814113
Tnfrsf26	0.401677	-1.68543	0.032	0.049	1	6	0.396123
Casp7	0.752283	-1.68504	0.074	0.081	1	6	0.123619
Mybpc3	0.153422	-1.68439	0	0.011	1	6	0.814113
Cryab	0.172013	-1.68312	0.005	0.022	1	6	0.764437
Fam227b	0.153422	-1.68259	0	0.011	1	6	0.814113
Zfp526	0.447476	-1.68237	0.016	0.027	1	6	0.34923
Ifit3b	0.167528	-1.68212	0.005	0.022	1	6	0.775912
Uchl4	0.167528	-1.68071	0.005	0.022	1	6	0.775912
C1qtnf4	0.153422	-1.67812	0	0.011	1	6	0.814113
Lrtm2	0.153422	-1.67673	0	0.011	1	6	0.814113
Gm28053	0.0504059	-1.66844	0.011	0.043	1	6	1.29752
Fmn1	0.387699	-1.66695	0.011	0.022	1	6	0.411506
Pcdh17	0.153422	-1.66265	0	0.011	1	6	0.814113
Tmod4	0.153422	-1.65994	0	0.011	1	6	0.814113
Angel1	0.301004	-1.65894	0.016	0.032	1	6	0.521428
Otud3	0.126429	-1.65884	0.032	0.065	1	6	0.898154
Bmp2	0.305098	-1.65739	0.005	0.016	1	6	0.515561
Mtmr4	0.015453	-1.65428	0.032	0.092	1	6	1.81099
Armcx5	0.000403181	-1.65404	0.026	0.124	1	6	3.3945
Dll1	0.144265	-1.65052	0.011	0.032	1	6	0.84084
Cdc6	0.169013	-1.64849	0.005	0.022	1	6	0.772079
Pask	0.153422	-1.64497	0	0.011	1	6	0.814113
H4c2	0.24052	-1.64411	0.011	0.027	1	6	0.618849
Ckap2	0.153422	-1.64396	0	0.011	1	6	0.814113
Mfsd13b	0.0797265	-1.63636	0	0.016	1	6	1.0984
Fermt2	0.153422	-1.63563	0	0.011	1	6	0.814113
Tnfrsf12a	0.305098	-1.63469	0.005	0.016	1	6	0.515561
Tent5d	0.305098	-1.63325	0.005	0.016	1	6	0.515561
Tprn	0.112911	-1.63066	0.016	0.043	1	6	0.947263
Gm26965	0.153422	-1.63059	0	0.011	1	6	0.814113
Tecpr2	0.0606166	-1.6269	0.048	0.097	1	6	1.21741
Klhl3	0.170509	-1.62596	0.005	0.022	1	6	0.768254
Erbb4	0.153422	-1.62585	0	0.011	1	6	0.814113
Dapl1	0.165321	-1.62343	0.026	0.054	1	6	0.781673
Zcwpw1	0.130614	-1.62134	0.053	0.092	1	6	0.884011
Fasl	0.153422	-1.61833	0	0.011	1	6	0.814113
Atp23	0.0458747	-1.61666	0.037	0.086	1	6	1.33843
Zfp628	0.0224768	-1.61473	0.021	0.07	1	6	1.64827
Lgr5	0.305098	-1.60683	0.005	0.016	1	6	0.515561
Fam221a	0.167528	-1.60499	0.005	0.022	1	6	0.775912
Pcdh7	0.153422	-1.60446	0	0.011	1	6	0.814113
Prdm1	0.221074	-1.59872	0.021	0.043	1	6	0.655463
Klre1	0.167909	-1.59077	0.026	0.054	1	6	0.774927
Rasl10a	0.153422	-1.58946	0	0.011	1	6	0.814113
Cd93	0.302573	-1.58875	0.005	0.016	1	6	0.51917
Rarb	0.552237	-1.58865	0.005	0.011	1	6	0.257875
Sgtb	0.0797265	-1.58208	0	0.016	1	6	1.0984
Adat2	0.0221097	-1.58018	0.032	0.086	1	6	1.65542
Prg3	0.302573	-1.5786	0.005	0.016	1	6	0.51917
Klhl17	0.456658	-1.5739	0.016	0.027	1	6	0.340409
Pjvk	0.153422	-1.57337	0	0.011	1	6	0.814113
Csf1r	0.153422	-1.57238	0	0.011	1	6	0.814113
Prdm8	0.153422	-1.56886	0	0.011	1	6	0.814113
Pcdhga12	0.153422	-1.5658	0	0.011	1	6	0.814113
Ica1l	0.180711	-1.56422	0.016	0.038	1	6	0.743016
Zfp28	0.548031	-1.56402	0.032	0.043	1	6	0.261195
Cxcl2	0.3918	-1.5605	0.037	0.022	1	6	0.406936
Taf9b	0.564805	-1.55991	0.037	0.049	1	6	0.248102
Rad54l	0.153422	-1.55972	0	0.011	1	6	0.814113
Dcdc2b	0.302573	-1.55791	0.005	0.016	1	6	0.51917
Gria2	0.153422	-1.55724	0	0.011	1	6	0.814113
Gm4631	0.170509	-1.55722	0.005	0.022	1	6	0.768254
Gm20509	0.153422	-1.55548	0	0.011	1	6	0.814113
Potegl	0.153422	-1.55005	0	0.011	1	6	0.814113
Krt87	0.153422	-1.54804	0	0.011	1	6	0.814113
Itga10	0.153422	-1.54785	0	0.011	1	6	0.814113
Rskr	0.153422	-1.54602	0	0.011	1	6	0.814113
Them7	0.153422	-1.54589	0	0.011	1	6	0.814113
Mb21d2	0.153422	-1.54513	0	0.011	1	6	0.814113
Jag1	0.307637	-1.54485	0.005	0.016	1	6	0.511962
Asf1b	0.0797265	-1.54393	0	0.016	1	6	1.0984
St6galnac2	0.153422	-1.54391	0	0.011	1	6	0.814113
Tmem41a	0.167528	-1.54336	0.005	0.022	1	6	0.775912
Fam228b	0.153422	-1.53912	0	0.011	1	6	0.814113
Ifng	0.0456317	-1.53516	0.016	0.054	1	6	1.34073
Slco5a1	0.169013	-1.53326	0.005	0.022	1	6	0.772079
Pakap.2	0.0304817	-1.5317	0.011	0.049	1	6	1.51596
Mroh2a	0.153422	-1.52946	0	0.011	1	6	0.814113
Tmem8b	0.143219	-1.5289	0.011	0.032	1	6	0.844
Icos	0.888057	-1.5272	0.063	0.065	1	6	0.0515593
Pnma8b	0.307637	-1.52691	0.005	0.016	1	6	0.511962
Sh3d19	0.548104	-1.52688	0.005	0.011	1	6	0.261137
Pld1	0.614949	-1.52436	0.048	0.059	1	6	0.211161
Enpp3	0.153422	-1.52335	0	0.011	1	6	0.814113
H2-Q2	0.153422	-1.51337	0	0.011	1	6	0.814113
Samd10	0.34153	-1.5106	0.021	0.038	1	6	0.466571
Ccdc192	0.153422	-1.51029	0	0.011	1	6	0.814113
Il20rb	0.169013	-1.50914	0.005	0.022	1	6	0.772079
Hsd3b7	0.153422	-1.50437	0	0.011	1	6	0.814113
Cenps	0.302573	-1.50286	0.005	0.016	1	6	0.51917
Axin2	0.17682	-1.49946	0.048	0.022	1	6	0.752469
Smyd5	0.129661	-1.49832	0.032	0.065	1	6	0.887191
Bnip5	0.153422	-1.49665	0	0.011	1	6	0.814113
Zswim9	0.0965815	-1.49602	0.005	0.027	1	6	1.01511
Wdr75	0.0455785	-1.49499	0.095	0.162	1	6	1.34124
Wls	0.333183	-1.49317	0.058	0.081	1	6	0.477318
Lgalsl	0.142179	-1.48565	0.011	0.032	1	6	0.847166
Tmem273	0.153422	-1.48287	0	0.011	1	6	0.814113
9430015G10Rik	0.143219	-1.48238	0.011	0.032	1	6	0.844
Zfp3	0.0144583	-1.48167	0.042	0.108	1	6	1.83988
Tcam1	0.0797265	-1.4745	0	0.016	1	6	1.0984
Ccdc152	0.153422	-1.47293	0	0.011	1	6	0.814113
Mypn	0.153422	-1.46721	0	0.011	1	6	0.814113
Aqp3	0.185212	-1.46493	0.016	0.038	1	6	0.73233
Gimap7	0.18501	-1.46226	0.026	0.054	1	6	0.732804
Rita1	0.697308	-1.4599	0.026	0.032	1	6	0.156575
ENSMUSG00000121597	0.153422	-1.45982	0	0.011	1	6	0.814113
Orc1	0.235656	-1.45415	0.011	0.027	1	6	0.627721
Adgrg6	0.242157	-1.45414	0.011	0.027	1	6	0.615903
Atn1	0.110316	-1.45355	0.042	0.081	1	6	0.957363
Perp	0.153422	-1.45277	0	0.011	1	6	0.814113
Tppp	0.0797265	-1.4519	0	0.016	1	6	1.0984
Or2c1	0.153422	-1.45078	0	0.011	1	6	0.814113
Bex1	0.153422	-1.44997	0	0.011	1	6	0.814113
Maoa	0.182951	-1.44974	0.016	0.038	1	6	0.737665
Ghr	0.153422	-1.44954	0	0.011	1	6	0.814113
Dcaf12l2	0.153422	-1.44927	0	0.011	1	6	0.814113
Tnfsf4	0.153422	-1.44919	0	0.011	1	6	0.814113
Hesx1	0.153422	-1.44717	0	0.011	1	6	0.814113
Fbxo36	0.0628597	-1.44654	0.021	0.059	1	6	1.20163
Tbc1d10a	0.0554716	-1.44512	0.032	0.076	1	6	1.25593
Klra1	0.153422	-1.44363	0	0.011	1	6	0.814113
Gm12258	0.161917	-1.44322	0.026	0.054	1	6	0.790709
Hace1	0.0491651	-1.44227	0.085	0.151	1	6	1.30834
Pfkfb1	0.170509	-1.44218	0.005	0.022	1	6	0.768254
Rabggta	0.414271	-1.44174	0.037	0.054	1	6	0.382716
Astn2	0.153422	-1.44137	0	0.011	1	6	0.814113
Hsh2d	0.174432	-1.43982	0.085	0.124	1	6	0.758373
Clic3	0.153422	-1.43938	0	0.011	1	6	0.814113
Siglecf	0.153422	-1.43904	0	0.011	1	6	0.814113
Prpf31	0.000730965	-1.43902	0.116	0.249	1	6	3.1361
B3galt1	0.172013	-1.43829	0.005	0.022	1	6	0.764437
Cenpn	0.302573	-1.43676	0.005	0.016	1	6	0.51917
Tdrp	0.0849602	-1.43551	0.011	0.038	1	6	1.07078
Dscaml1	0.0965815	-1.43413	0.005	0.027	1	6	1.01511
Il2rb	0.44816	-1.4326	0.101	0.119	1	6	0.348567
Ppp2r5b	0.238891	-1.43137	0.011	0.027	1	6	0.6218
Rgs11	0.0797265	-1.42894	0	0.016	1	6	1.0984
Plxna2	0.262724	-1.42611	0.026	0.049	1	6	0.5805
Kif17	0.153422	-1.42575	0	0.011	1	6	0.814113
Igf2bp2	0.153422	-1.42563	0	0.011	1	6	0.814113
Cobl	0.153422	-1.41956	0	0.011	1	6	0.814113
Slc44a3	0.153422	-1.41735	0	0.011	1	6	0.814113
Gm20517	0.132957	-1.41611	0.032	0.065	1	6	0.876289
Hyal3	0.305098	-1.41442	0.005	0.016	1	6	0.515561
Mroh5	0.153422	-1.41046	0	0.011	1	6	0.814113
Fbn1	0.390119	-1.4101	0.011	0.022	1	6	0.408803
Calr4	0.153422	-1.40927	0	0.011	1	6	0.814113
Slc25a47	0.153422	-1.40644	0	0.011	1	6	0.814113
Rnf113a1	0.216379	-1.40513	0.021	0.043	1	6	0.664784
Bbof1	0.307637	-1.40199	0.005	0.016	1	6	0.511962
Anxa3	0.307637	-1.39938	0.005	0.016	1	6	0.511962
Slc22a17	0.169013	-1.39889	0.005	0.022	1	6	0.772079
Cracd	0.23727	-1.39797	0.011	0.027	1	6	0.624758
Acap3	0.738393	-1.39777	0.042	0.049	1	6	0.131713
Rorc	0.330044	-1.39678	0.021	0.038	1	6	0.481428
Cnr1	0.153422	-1.39606	0	0.011	1	6	0.814113
Snx24	0.153422	-1.39604	0	0.011	1	6	0.814113
Nek4	0.167043	-1.39093	0.026	0.054	1	6	0.777173
Pnldc1	0.302573	-1.3898	0.005	0.016	1	6	0.51917
Nat14	0.153422	-1.38838	0	0.011	1	6	0.814113
Garin4	0.0797265	-1.38736	0	0.016	1	6	1.0984
Fas	0.365769	-1.38297	0.026	0.043	1	6	0.436793
Hrh4	0.153422	-1.38041	0	0.011	1	6	0.814113
Sgip1	0.153422	-1.38038	0	0.011	1	6	0.814113
Klf5	0.153422	-1.38009	0	0.011	1	6	0.814113
Pear1	0.717523	-1.37988	0.032	0.038	1	6	0.144164
Pkn3	0.153422	-1.37756	0	0.011	1	6	0.814113
Nhs	0.153422	-1.37674	0	0.011	1	6	0.814113
Slc25a18	0.153422	-1.37299	0	0.011	1	6	0.814113
Nhsl1	0.144265	-1.37256	0.011	0.032	1	6	0.84084
Gm44790	0.153422	-1.37181	0	0.011	1	6	0.814113
Adam2	0.975452	-1.37155	0.016	0.016	1	6	0.0107942
Dnah6	0.153422	-1.37081	0	0.011	1	6	0.814113
Hsd17b7	0.0147324	-1.37063	0.021	0.076	1	6	1.83173
Tmem177	0.215217	-1.36854	0.021	0.043	1	6	0.667123
Kcng3	0.674663	-1.36691	0.016	0.022	1	6	0.170913
Tmem14a	0.0965815	-1.36659	0.005	0.027	1	6	1.01511
Pbx4	0.302573	-1.36499	0.005	0.016	1	6	0.51917
Gpr21	0.302573	-1.36293	0.005	0.016	1	6	0.51917
Sh3yl1	0.302573	-1.36052	0.005	0.016	1	6	0.51917
Kcnk2	0.234051	-1.35926	0.011	0.027	1	6	0.63069
Spag5	0.235656	-1.35878	0.011	0.027	1	6	0.627721
Adcy8	0.302573	-1.35797	0.005	0.016	1	6	0.51917
Vill	0.153422	-1.35764	0	0.011	1	6	0.814113
Tarbp2	0.22334	-1.35717	0.069	0.103	1	6	0.651034
Zfp442	0.0869349	-1.3522	0.011	0.038	1	6	1.06081
Cyp4v3	0.219893	-1.35189	0.021	0.043	1	6	0.657788
Zik1	0.153422	-1.35079	0	0.011	1	6	0.814113
Sfn	0.548104	-1.34933	0.005	0.011	1	6	0.261137
Agmo	0.0780085	-1.34843	0.042	0.086	1	6	1.10786
Gm12184	0.0965815	-1.3481	0.005	0.027	1	6	1.01511
Ciao3	0.0714353	-1.3428	0.058	0.108	1	6	1.14609
Gm48551	0.153422	-1.33978	0	0.011	1	6	0.814113
Stxbp1	0.0512171	-1.33973	0.011	0.043	1	6	1.29059
Lhfpl2	0.302573	-1.33874	0.005	0.016	1	6	0.51917
Lrrc25	0.143698	-1.33832	0.021	0.049	1	6	0.842549
Epop	0.170509	-1.33787	0.005	0.022	1	6	0.768254
H3c1	0.180709	-1.33695	0.095	0.135	1	6	0.743021
Hopx	0.188603	-1.33673	0.032	0.059	1	6	0.724452
Vegfa	0.149569	-1.33539	0.021	0.049	1	6	0.825157
Dsn1	0.41766	-1.33455	0.032	0.049	1	6	0.379177
Jazf1	0.144265	-1.33406	0.011	0.032	1	6	0.84084
Samd3	0.447476	-1.33335	0.016	0.027	1	6	0.34923
Mroh8	0.153422	-1.33218	0	0.011	1	6	0.814113
Bmp7	0.0965815	-1.3316	0.005	0.027	1	6	1.01511
Pdgfrb	0.153422	-1.33103	0	0.011	1	6	0.814113
Cacna1a	0.38361	-1.32862	0.026	0.043	1	6	0.416111
Grid1	0.548104	-1.32744	0.005	0.011	1	6	0.261137
Gpatch1	0.041858	-1.3274	0.069	0.13	1	6	1.37822
Adam8	0.0740728	-1.32694	0.016	0.049	1	6	1.13034
Boll	0.0965815	-1.32371	0.005	0.027	1	6	1.01511
Fam167b	0.153422	-1.32342	0	0.011	1	6	0.814113
Itga11	0.153422	-1.32079	0	0.011	1	6	0.814113
Wnt11	0.170509	-1.31874	0.005	0.022	1	6	0.768254
Wfdc8	0.153422	-1.31581	0	0.011	1	6	0.814113
Stk33	0.394986	-1.315	0.011	0.022	1	6	0.403418
Amotl1	0.153422	-1.31368	0	0.011	1	6	0.814113
Zfp57	0.548104	-1.31234	0.005	0.011	1	6	0.261137
Gbp5	0.221074	-1.31213	0.021	0.043	1	6	0.655463
Rab37	0.0374507	-1.31075	0.063	0.124	1	6	1.42654
Mdfi	0.153422	-1.31041	0	0.011	1	6	0.814113
Nkain2	0.170509	-1.30796	0.005	0.022	1	6	0.768254
Cracdl	0.0965815	-1.30705	0.005	0.027	1	6	1.01511
Slc29a2	0.153422	-1.30664	0	0.011	1	6	0.814113
Tbx2	0.153422	-1.30423	0	0.011	1	6	0.814113
Spag4	0.153422	-1.30397	0	0.011	1	6	0.814113
Pidd1	0.97644	-1.30274	0.011	0.011	1	6	0.0103543
Gm14296	0.2861	-1.30204	0.016	0.032	1	6	0.543483
B4galt4	0.0806754	-1.30118	0.026	0.065	1	6	1.09326
Fbf1	0.808879	-1.29978	0.032	0.027	1	6	0.0921163
Dlg3	0.34153	-1.29926	0.021	0.038	1	6	0.466571
Trp63	0.172013	-1.29838	0.005	0.022	1	6	0.764437
Hddc3	0.0775074	-1.29725	0.026	0.065	1	6	1.11066
Or1o1	0.153422	-1.29709	0	0.011	1	6	0.814113
Eqtn	0.153422	-1.29597	0	0.011	1	6	0.814113
Ntrk1	0.153422	-1.29501	0	0.011	1	6	0.814113
Tmem232	0.153422	-1.29501	0	0.011	1	6	0.814113
Zfp459	0.548104	-1.29478	0.005	0.011	1	6	0.261137
Lmo7	0.302573	-1.29476	0.005	0.016	1	6	0.51917
Gzmb	0.975452	-1.29425	0.016	0.016	1	6	0.0107942
Nek3	0.284475	-1.29264	0.016	0.032	1	6	0.545956
She	0.153422	-1.29248	0	0.011	1	6	0.814113
Sema6a	0.153422	-1.29125	0	0.011	1	6	0.814113
Homez	0.187494	-1.28849	0.016	0.038	1	6	0.727013
Gucy2c	0.24052	-1.28846	0.011	0.027	1	6	0.618849
Oas1c	0.302573	-1.28834	0.005	0.016	1	6	0.51917
Xcl1	0.0561337	-1.28814	0.074	0.135	1	6	1.25078
Zfp58	0.0965815	-1.28778	0.005	0.027	1	6	1.01511
Stx2	0.784057	-1.28763	0.048	0.054	1	6	0.105652
Dock1	0.188642	-1.28618	0.016	0.038	1	6	0.724361
Syt11	0.735625	-1.28077	0.032	0.038	1	6	0.133344
Pde1c	0.0239843	-1.27994	0.063	0.13	1	6	1.62007
Bdh1	0.0740728	-1.27851	0.016	0.049	1	6	1.13034
S1pr5	0.153422	-1.27553	0	0.011	1	6	0.814113
Armc9	0.0865051	-1.27505	0.048	0.092	1	6	1.06296
Dgat2	0.143219	-1.27407	0.011	0.032	1	6	0.844
Ccdc43	0.0336316	-1.27378	0.085	0.151	1	6	1.47325
Plpp2	0.153422	-1.27128	0	0.011	1	6	0.814113
Tesc	0.38299	-1.26943	0.032	0.049	1	6	0.416812
Klra7	0.630586	-1.26919	0.011	0.016	1	6	0.200256
Gm20422	0.170509	-1.26897	0.005	0.022	1	6	0.768254
Zdhhc1	0.172302	-1.26848	0.048	0.081	1	6	0.763709
Rgs12	0.17889	-1.2678	0.053	0.086	1	6	0.747414
E130114P18Rik	0.153422	-1.26729	0	0.011	1	6	0.814113
Pabpc1l	0.153422	-1.26465	0	0.011	1	6	0.814113
Ttc12	0.153422	-1.26306	0	0.011	1	6	0.814113
Zfp33b	0.165185	-1.25959	0.074	0.114	1	6	0.782029
Gprc5a	0.627172	-1.25828	0.011	0.016	1	6	0.202613
Abcb6	0.305098	-1.2571	0.005	0.016	1	6	0.515561
Pgbd1	0.307637	-1.25556	0.005	0.016	1	6	0.511962
Klhl25	0.265278	-1.24943	0.042	0.022	1	6	0.576298
Fap	0.305098	-1.24908	0.005	0.016	1	6	0.515561
Zfp7	0.0876013	-1.2478	0.011	0.038	1	6	1.05749
Gpc5	0.548104	-1.24294	0.005	0.011	1	6	0.261137
Gng7	0.454353	-1.24122	0.016	0.027	1	6	0.342607
Anxa9	0.710497	-1.23886	0.021	0.027	1	6	0.148438
Aldh1l2	0.153422	-1.23547	0	0.011	1	6	0.814113
Rusf1	0.116671	-1.2345	0.016	0.043	1	6	0.933036
F2rl2	0.394986	-1.23329	0.011	0.022	1	6	0.403418
Snx21	0.291011	-1.22537	0.016	0.032	1	6	0.53609
Abcb9	0.330044	-1.22518	0.021	0.038	1	6	0.481428
Adam23	0.134966	-1.2245	0.032	0.065	1	6	0.869777
Sfxn5	0.302573	-1.22445	0.005	0.016	1	6	0.51917
Pygl	0.169013	-1.22345	0.005	0.022	1	6	0.772079
Gm8113	0.548104	-1.22318	0.005	0.011	1	6	0.261137
Lbhd1	0.23727	-1.2229	0.011	0.027	1	6	0.624758
1700012B07Rik	0.153422	-1.22168	0	0.011	1	6	0.814113
Chil1	0.548104	-1.2216	0.005	0.011	1	6	0.261137
Tcf19	0.705136	-1.22025	0.021	0.027	1	6	0.151727
Rexo5	0.144526	-1.21716	0.021	0.049	1	6	0.840054
Fan1	0.445744	-1.21636	0.048	0.065	1	6	0.350914
D430019H16Rik	0.548104	-1.21612	0.005	0.011	1	6	0.261137
Fam83d	0.146374	-1.21547	0.011	0.032	1	6	0.834535
Aoc2	0.397433	-1.21502	0.011	0.022	1	6	0.400736
Bcl9	0.0522136	-1.21332	0.085	0.146	1	6	1.28222
Dynlt1c	0.184079	-1.21213	0.016	0.038	1	6	0.734995
Ppt2	0.153685	-1.21121	0.085	0.124	1	6	0.813369
Dtwd2	0.256576	-1.20748	0.026	0.049	1	6	0.590783
Rbm24	0.153422	-1.20728	0	0.011	1	6	0.814113
Il18rap	0.460816	-1.20602	0.053	0.07	1	6	0.336472
Thop1	0.140423	-1.20455	0.021	0.049	1	6	0.852561
Osgin2	0.487773	-1.20223	0.058	0.076	1	6	0.311782
Taf4b	0.149551	-1.2018	0.111	0.157	1	6	0.825211
Crtam	0.454353	-1.20155	0.016	0.027	1	6	0.342607
Ldb2	0.305098	-1.20099	0.005	0.016	1	6	0.515561
Nckap5l	0.677643	-1.19958	0.016	0.022	1	6	0.168999
Ppp2r3d	0.0371053	-1.19789	0.063	0.124	1	6	1.43056
Ntn1	0.153422	-1.19692	0	0.011	1	6	0.814113
Map1s	0.126723	-1.19549	0.095	0.146	1	6	0.897145
Dph1	0.242157	-1.19442	0.011	0.027	1	6	0.615903
Gng3	0.548104	-1.19353	0.005	0.011	1	6	0.261137
Igsf3	0.145317	-1.19134	0.011	0.032	1	6	0.837685
Dok2	0.432975	-1.19042	0.048	0.065	1	6	0.363537
Wdr17	0.173528	-1.18933	0.005	0.022	1	6	0.76063
Qpct	0.637438	-1.18868	0.011	0.016	1	6	0.195562
Cxcl16	0.945412	-1.18801	0.026	0.027	1	6	0.0243788
Hilpda	0.168594	-1.18718	0.069	0.108	1	6	0.773157
H2bc6	0.0548251	-1.1824	0.095	0.162	1	6	1.26102
Tmem204	0.153422	-1.18161	0	0.011	1	6	0.814113
Dao	0.153422	-1.17939	0	0.011	1	6	0.814113
Klk8	0.0876373	-1.17908	0.079	0.13	1	6	1.05731
Chad	0.153422	-1.17769	0	0.011	1	6	0.814113
Gm14399	0.093532	-1.17662	0.021	0.054	1	6	1.02904
Hhat	0.577835	-1.1762	0.063	0.076	1	6	0.238196
Cngb1	0.305098	-1.17564	0.005	0.016	1	6	0.515561
Slc16a13	0.518587	-1.17387	0.026	0.038	1	6	0.285179
Snta1	0.305098	-1.17342	0.005	0.016	1	6	0.515561
Uqcc4	0.000210225	-1.16815	0.206	0.373	1	6	3.67732
Vipr1	0.170509	-1.16684	0.005	0.022	1	6	0.768254
Mettl27	0.0974666	-1.16594	0.005	0.027	1	6	1.01114
Nr1d1	0.637438	-1.16488	0.011	0.016	1	6	0.195562
Prss12	0.335945	-1.16465	0.032	0.016	1	6	0.473731
Suv39h2	0.238891	-1.16311	0.011	0.027	1	6	0.6218
Ntmt1	0.0158301	-1.16226	0.159	0.254	1	6	1.80052
Acvrl1	0.402355	-1.16189	0.011	0.022	1	6	0.395391
Poll	0.548104	-1.16137	0.005	0.011	1	6	0.261137
Xcr1	0.548104	-1.16012	0.005	0.011	1	6	0.261137
Lta	0.408026	-1.15854	0.032	0.049	1	6	0.389313
Gpaa1	0.23239	-1.15801	0.085	0.119	1	6	0.633783
Gata3	0.288363	-1.158	0.074	0.103	1	6	0.54006
Leng9	0.961707	-1.15746	0.101	0.097	1	6	0.016957
Ddx11	0.973752	-1.15744	0.032	0.032	1	6	0.0115517
Zbtb8a	0.11975	-1.15499	0.016	0.043	1	6	0.921726
Rgs16	0.305098	-1.15346	0.005	0.016	1	6	0.515561
Zfp536	0.548104	-1.15219	0.005	0.011	1	6	0.261137
Cilk1	0.103489	-1.15089	0.037	0.076	1	6	0.985105
Flt3l	0.938017	-1.15057	0.042	0.043	1	6	0.0277895
C9orf72	0.0470169	-1.14696	0.063	0.124	1	6	1.32775
Tmem119	0.242157	-1.14543	0.011	0.027	1	6	0.615903
Brat1	0.113525	-1.14401	0.026	0.059	1	6	0.944909
Zfp607a	0.872171	-1.14401	0.053	0.049	1	6	0.0593984
Ms4a4b	0.325288	-1.14324	0.169	0.195	1	6	0.487732
Llgl2	0.958764	-1.14244	0.032	0.032	1	6	0.0182883
D11Wsu47e	0.10762	-1.1422	0.037	0.076	1	6	0.968109
Ly6c1	0.630586	-1.14208	0.011	0.016	1	6	0.200256
Mblac1	0.305098	-1.14161	0.005	0.016	1	6	0.515561
Best1	0.305098	-1.13761	0.005	0.016	1	6	0.515561
Smim1	0.394986	-1.13615	0.011	0.022	1	6	0.403418
Cdkl2	0.581586	-1.13545	0.011	0.005	1	6	0.235386
Ankmy1	0.665754	-1.13542	0.016	0.022	1	6	0.176686
Synpo	0.387699	-1.13251	0.011	0.022	1	6	0.411506
Ggct	0.0537816	-1.13234	0.058	0.114	1	6	1.26937
Pappa2	0.307637	-1.1319	0.005	0.016	1	6	0.511962
Ddx60	0.726745	-1.1319	0.048	0.054	1	6	0.138618
Gtf3c3	0.133076	-1.13111	0.069	0.114	1	6	0.875902
Ccr10	0.394986	-1.13093	0.011	0.022	1	6	0.403418
Msantd4	0.612418	-1.13051	0.09	0.103	1	6	0.212952
Nol4l	0.767605	-1.12983	0.026	0.022	1	6	0.114862
Galnt3	0.738247	-1.12969	0.021	0.016	1	6	0.131798
Trim2	0.155622	-1.12692	0.021	0.049	1	6	0.807929
Gins2	0.189229	-1.12646	0.021	0.005	1	6	0.723012
Timm29	0.376053	-1.12632	0.085	0.108	1	6	0.424751
Mocs3	0.193097	-1.12541	0.032	0.059	1	6	0.714224
Tha1	0.316168	-1.11898	0.042	0.065	1	6	0.500082
Acsbg1	0.971946	-1.11742	0.016	0.016	1	6	0.0123577
Dhx58	0.0958295	-1.11491	0.021	0.054	1	6	1.0185
Repin1	0.630586	-1.11484	0.011	0.016	1	6	0.200256
Adora2a	0.186551	-1.11412	0.058	0.092	1	6	0.729202
Slc35d1	0.281543	-1.11399	0.063	0.092	1	6	0.550455
Spata2l	0.677643	-1.11176	0.016	0.022	1	6	0.168999
Onecut3	0.97644	-1.11048	0.011	0.011	1	6	0.0103543
Sstr2	0.548104	-1.10996	0.005	0.011	1	6	0.261137
Ubxn11	0.0731583	-1.10878	0.026	0.065	1	6	1.13574
Atg16l1	0.129401	-1.10687	0.18	0.232	1	6	0.888062
Ndnf	0.172013	-1.10618	0.005	0.022	1	6	0.764437
Etfbkmt	0.113045	-1.10289	0.116	0.173	1	6	0.94675
Ptpn21	0.737898	-1.09921	0.032	0.038	1	6	0.132004
Tigit	0.402355	-1.09869	0.011	0.022	1	6	0.395391
Vpreb1a	0.242157	-1.09831	0.011	0.027	1	6	0.615903
Thnsl2	0.559719	-1.09586	0.032	0.043	1	6	0.25203
Cenpb	0.0272035	-1.09548	0.095	0.173	1	6	1.56538
Kif4	0.307637	-1.09525	0.005	0.016	1	6	0.511962
Xlr	0.305098	-1.09499	0.005	0.016	1	6	0.515561
Hgh1	0.357557	-1.09427	0.053	0.076	1	6	0.446655
Gimap5	0.0351138	-1.09408	0.074	0.141	1	6	1.45452
Rab4a	0.257798	-1.08919	0.026	0.049	1	6	0.58872
Cdc42bpg	0.114775	-1.08846	0.026	0.059	1	6	0.940152
Hr	0.151752	-1.08765	0.011	0.032	1	6	0.818866
Tmem176a	0.291964	-1.08557	0.127	0.157	1	6	0.53467
Map1b	0.548104	-1.08519	0.005	0.011	1	6	0.261137
Trmt44	0.0338469	-1.08378	0.026	0.076	1	6	1.47048
Or10aa1	0.390119	-1.08324	0.011	0.022	1	6	0.408803
Ryr3	0.307637	-1.08278	0.005	0.016	1	6	0.511962
Tcp11l1	0.964937	-1.08004	0.016	0.016	1	6	0.0155011
Parp16	0.291011	-1.07724	0.016	0.032	1	6	0.53609
Dapk1	0.113424	-1.07711	0.042	0.081	1	6	0.945297
Phf7	0.186313	-1.07617	0.111	0.151	1	6	0.729757
Plbd1	0.86956	-1.07346	0.101	0.103	1	6	0.0607004
Astl	0.302573	-1.07157	0.005	0.016	1	6	0.51917
Mturn	0.222258	-1.06703	0.021	0.043	1	6	0.653142
Lsamp	0.305098	-1.06679	0.005	0.016	1	6	0.515561
Gm10767	0.305098	-1.06533	0.005	0.016	1	6	0.515561
Tmcc2	0.548104	-1.06361	0.005	0.011	1	6	0.261137
Triqk	0.194917	-1.05962	0.032	0.059	1	6	0.71015
Msrb2	0.223175	-1.05934	0.042	0.07	1	6	0.651354
Tsacc	0.778435	-1.05923	0.101	0.108	1	6	0.108778
Ercc8	0.327783	-1.05769	0.053	0.076	1	6	0.484413
Snx25	0.127331	-1.05626	0.048	0.086	1	6	0.895067
Pola1	0.390536	-1.05416	0.101	0.124	1	6	0.408339
Gpr162	0.147851	-1.05356	0.101	0.146	1	6	0.830177
Zfp518b	0.408235	-1.05311	0.037	0.054	1	6	0.38909
Scrib	0.23068	-1.05271	0.021	0.043	1	6	0.63699
Pacc1	0.242898	-1.05231	0.042	0.07	1	6	0.614576
Etl4	0.0544117	-1.05216	0.005	0.032	1	6	1.26431
Zfp94	0.305098	-1.05214	0.005	0.016	1	6	0.515561
Zfp873	0.182227	-1.05041	0.026	0.054	1	6	0.739386
Hk2	0.40272	-1.05033	0.111	0.135	1	6	0.394997
Smco4	0.0351743	-1.0479	0.095	0.168	1	6	1.45377
Tpm3-rs7	0.291011	-1.04676	0.016	0.032	1	6	0.53609
Dmpk	0.153422	-1.04626	0	0.011	1	6	0.814113
Neurl3	0.282636	-1.04504	0.069	0.097	1	6	0.548773
Gm29394	0.479602	-1.04395	0.021	0.032	1	6	0.319119
Hspbp1	0.0814534	-1.04329	0.09	0.146	1	6	1.08909
Dppa2	0.548104	-1.04092	0.005	0.011	1	6	0.261137
Dock6	0.222258	-1.03967	0.021	0.043	1	6	0.653142
Rab11fip5	0.133624	-1.03932	0.032	0.065	1	6	0.874116
Ssh3	0.563641	-1.03919	0.032	0.043	1	6	0.248997
Zfp607b	0.173528	-1.03795	0.005	0.022	1	6	0.76063
Miip	0.0487867	-1.03786	0.111	0.178	1	6	1.3117
Crim1	0.259362	-1.0377	0.058	0.086	1	6	0.586094
Slc25a37	0.103504	-1.03723	0.085	0.135	1	6	0.985044
Reps2	0.0882718	-1.03593	0.011	0.038	1	6	1.05418
Ifi206	0.182429	-1.03428	0.048	0.081	1	6	0.738906
Top2a	0.580882	-1.02714	0.048	0.059	1	6	0.235912
Alpk3	0.307637	-1.02665	0.005	0.016	1	6	0.511962
Tnip2	0.309799	-1.02599	0.132	0.162	1	6	0.50892
Sspo	0.454353	-1.02573	0.016	0.027	1	6	0.342607
Fbxo17	0.140032	-1.02387	0.101	0.146	1	6	0.853774
Rab2b	0.042047	-1.02365	0.111	0.178	1	6	1.37626
Mapk12	0.153422	-1.02346	0	0.011	1	6	0.814113
Mavs	0.464841	-1.0224	0.079	0.103	1	6	0.332696
Fra10ac1	0.0553018	-1.02228	0.185	0.259	1	6	1.25726
Klri1	0.630586	-1.02181	0.011	0.016	1	6	0.200256
Lrmda	0.289247	-1.01881	0.074	0.103	1	6	0.538731
Vsig10l	0.634008	-1.01805	0.011	0.016	1	6	0.197905
Spry2	0.173253	-1.01803	0.042	0.076	1	6	0.76132
Nckap5	0.189796	-1.01789	0.016	0.038	1	6	0.721713
Stac3	0.630586	-1.01694	0.011	0.016	1	6	0.200256
Pstpip2	0.734122	-1.01499	0.079	0.07	1	6	0.134232
Hgsnat	0.112636	-1.01387	0.063	0.108	1	6	0.948321
Il2	0.302573	-1.01224	0.005	0.016	1	6	0.51917
Zfp358	0.321032	-1.0118	0.048	0.07	1	6	0.493451
Taf6l	0.212385	-1.01061	0.095	0.135	1	6	0.672877
Zfp40	0.829136	-1.00969	0.058	0.054	1	6	0.0813744
Ninl	0.172013	-1.00786	0.005	0.022	1	6	0.764437
Pradc1	0.28543	-1.00754	0.058	0.086	1	6	0.544501
Galns	0.265502	-1.00657	0.127	0.168	1	6	0.575933
Irag1	0.548104	-1.00638	0.005	0.011	1	6	0.261137
Plscr4	0.978958	-1.00638	0.016	0.016	1	6	0.00923602
Ccdc181	0.457803	-1.00608	0.058	0.076	1	6	0.339321
Msto1	0.105938	-1.00473	0.058	0.103	1	6	0.974948
Eef1akmt4	0.830642	-1.00351	0.042	0.038	1	6	0.0805863
Tcf7	0.276346	-1.00172	0.143	0.178	1	6	0.558548
Armcx1	0.968441	-1.00161	0.016	0.016	1	6	0.0139267
Arhgap22	0.942687	-1.00108	0.026	0.027	1	6	0.0256323
Zfp41	0.0903083	-1.00029	0.011	0.038	1	6	1.04427
Gna14	0.97644	-0.99991	0.011	0.011	1	6	0.0103543
Mccc1	0.318657	-0.997986	0.106	0.135	1	6	0.496676
Ip6k1	0.0901998	-0.9979	0.148	0.211	1	6	1.04479
Lcmt2	0.213325	-0.997755	0.037	0.065	1	6	0.670958
Unkl	0.171713	-0.996965	0.111	0.157	1	6	0.765196
Nxnl2	0.153422	-0.995548	0	0.011	1	6	0.814113
Serf1	0.338223	-0.995399	0.021	0.038	1	6	0.470797
Sord	0.221074	-0.995145	0.021	0.043	1	6	0.655463
Arl4d	0.737898	-0.994828	0.032	0.038	1	6	0.132004
Kdm8	0.394986	-0.994678	0.011	0.022	1	6	0.403418
H2bc26-ps	0.97644	-0.994601	0.011	0.011	1	6	0.0103543
Spin2c	0.552237	-0.992325	0.005	0.011	1	6	0.257875
Actn2	0.375202	-0.990924	0.048	0.07	1	6	0.425734
Car12	0.548104	-0.990484	0.005	0.011	1	6	0.261137
Clcn2	0.0636599	-0.989736	0.021	0.059	1	6	1.19613
B4galt7	0.596797	-0.988121	0.053	0.065	1	6	0.224174
Grik5	0.307637	-0.987464	0.005	0.016	1	6	0.511962
Bcl2a1d	0.746216	-0.987244	0.037	0.043	1	6	0.127135
Umad1	0.602938	-0.986595	0.037	0.027	1	6	0.219728
Agpat2	0.162961	-0.983031	0.101	0.146	1	6	0.787916
Asb13	0.0071486	-0.982885	0.138	0.243	1	6	2.14578
Fancm	0.420359	-0.981488	0.037	0.054	1	6	0.37638
Glyctk	0.307637	-0.981373	0.005	0.016	1	6	0.511962
Osbpl6	0.153422	-0.981331	0	0.011	1	6	0.814113
Slc27a6	0.153422	-0.981331	0	0.011	1	6	0.814113
1700037H04Rik	0.330044	-0.980679	0.021	0.038	1	6	0.481428
Abraxas1	0.153411	-0.980506	0.09	0.135	1	6	0.814142
Zfp146	0.269218	-0.979865	0.053	0.081	1	6	0.569896
Arhgap31	0.164993	-0.976821	0.101	0.146	1	6	0.782535
Slc35f2	0.145317	-0.975343	0.011	0.032	1	6	0.837685
Lpar1	0.581586	-0.973288	0.011	0.005	1	6	0.235386
Ada	0.0765282	-0.972293	0.037	0.081	1	6	1.11618
Kcnip4	0.392548	-0.971119	0.011	0.022	1	6	0.406108
Adm	0.689613	-0.971002	0.016	0.022	1	6	0.161394
Fbxo45	0.190391	-0.970266	0.032	0.059	1	6	0.720353
Aldh4a1	0.823464	-0.969182	0.037	0.032	1	6	0.0843554
Dok1	0.0362881	-0.967535	0.085	0.151	1	6	1.44024
Zfp791	0.331116	-0.967249	0.016	0.005	1	6	0.48002
Matk	0.185855	-0.965874	0.09	0.13	1	6	0.730826
Tnfrsf22	0.305098	-0.964214	0.005	0.016	1	6	0.515561
Aurka	0.307637	-0.963878	0.005	0.016	1	6	0.511962
Tsen54	0.334936	-0.963606	0.021	0.038	1	6	0.475038
Pym1	0.0675131	-0.958638	0.106	0.168	1	6	1.17061
Kcnn4	0.394155	-0.958238	0.09	0.114	1	6	0.404333
Cdk2ap1	0.138229	-0.958093	0.212	0.265	1	6	0.859401
Chchd10	0.247367	-0.958001	0.164	0.205	1	6	0.606659
Rnf145	0.0186801	-0.957366	0.085	0.162	1	6	1.72862
Unc13a	0.305098	-0.957148	0.005	0.016	1	6	0.515561
Specc1	0.408235	-0.956762	0.037	0.054	1	6	0.38909
Plekhg1	0.634008	-0.956502	0.011	0.016	1	6	0.197905
Gm28557	0.242157	-0.956291	0.011	0.027	1	6	0.615903
Abtb3	0.266635	-0.955075	0.058	0.086	1	6	0.574082
Adck2	0.0893305	-0.954002	0.048	0.092	1	6	1.049
Or2l13	0.115782	-0.952569	0.079	0.13	1	6	0.936358
Map3k15	0.671688	-0.952183	0.016	0.022	1	6	0.172832
Adal	0.651423	-0.951633	0.085	0.07	1	6	0.186137
Reep1	0.0903083	-0.9515	0.011	0.038	1	6	1.04427
Shq1	0.323329	-0.95135	0.042	0.065	1	6	0.490356
9030025P20Rik	0.297648	-0.950423	0.016	0.032	1	6	0.526297
Cdh23	0.597805	-0.950382	0.048	0.059	1	6	0.22344
Zbtb42	0.634008	-0.949034	0.011	0.016	1	6	0.197905
Fbxl9	0.223175	-0.948659	0.042	0.07	1	6	0.651354
Cd2	0.410927	-0.948045	0.116	0.141	1	6	0.386235
Eda	0.139458	-0.947947	0.074	0.119	1	6	0.855558
Myo5c	0.552237	-0.946695	0.005	0.011	1	6	0.257875
Sox12	0.242157	-0.945396	0.011	0.027	1	6	0.615903
Habp4	0.0556242	-0.943855	0.026	0.07	1	6	1.25474
Zfp688	0.124137	-0.943854	0.074	0.119	1	6	0.906097
Rab3a	0.729041	-0.942037	0.021	0.016	1	6	0.137248
Zfp808	0.207571	-0.941951	0.063	0.097	1	6	0.682833
Ganc	0.368641	-0.941222	0.106	0.135	1	6	0.433397
Nudcd1	0.483714	-0.94102	0.122	0.146	1	6	0.315412
Zfp692	0.0402154	-0.940388	0.042	0.097	1	6	1.39561
H4c6	0.548104	-0.93963	0.005	0.011	1	6	0.261137
Tdp1	0.19436	-0.939325	0.058	0.092	1	6	0.711393
Zcwpw2	0.338223	-0.936523	0.021	0.038	1	6	0.470797
Nt5dc3	0.353125	-0.936392	0.026	0.043	1	6	0.452072
Ly75	0.318543	-0.936173	0.042	0.065	1	6	0.496831
Nab2	0.397433	-0.936146	0.011	0.022	1	6	0.400736
Tedc2	0.726555	-0.935271	0.032	0.038	1	6	0.138732
Ptpn22	0.293983	-0.934616	0.138	0.168	1	6	0.531677
Alkbh4	0.319735	-0.931919	0.042	0.065	1	6	0.495209
Acsbg3	0.307637	-0.929972	0.005	0.016	1	6	0.511962
Nkg7	0.209206	-0.929367	0.122	0.162	1	6	0.679426
Amelx	0.243801	-0.929175	0.011	0.027	1	6	0.612964
Wdr25	0.574176	-0.92906	0.048	0.059	1	6	0.240955
Ankzf1	0.181314	-0.926414	0.074	0.114	1	6	0.741569
Mphosph9	0.257451	-0.925269	0.09	0.124	1	6	0.589305
Zfp850	0.392548	-0.925101	0.011	0.022	1	6	0.406108
Ttbk1	0.548104	-0.923237	0.005	0.011	1	6	0.261137
Triap1	0.00478543	-0.922909	0.254	0.378	1	6	2.32008
Nme4	0.296168	-0.921989	0.037	0.059	1	6	0.528462
Il1rl2	0.753875	-0.921862	0.074	0.065	1	6	0.1227
Il17re	0.452054	-0.920692	0.016	0.027	1	6	0.34481
Mrpl45	0.138811	-0.920194	0.111	0.162	1	6	0.857578
Itga6	0.930113	-0.919632	0.048	0.049	1	6	0.0314641
Pck2	0.116066	-0.919074	0.042	0.081	1	6	0.935296
Stom	0.471915	-0.91872	0.048	0.065	1	6	0.326137
Wwc2	0.213011	-0.916657	0.09	0.13	1	6	0.671598
Hic2	0.73348	-0.916167	0.053	0.059	1	6	0.134612
Fastkd5	0.548104	-0.915186	0.005	0.011	1	6	0.261137
Smpdl3a	0.961515	-0.914644	0.122	0.119	1	6	0.017044
Frat2	0.116716	-0.914557	0.063	0.108	1	6	0.932868
Nrgn	0.835215	-0.91279	0.037	0.032	1	6	0.0782019
Celsr1	0.2343	-0.912659	0.042	0.07	1	6	0.630227
Bak1	0.0140052	-0.912245	0.127	0.222	1	6	1.85371
Meaf6	0.0255565	-0.910699	0.185	0.281	1	6	1.5925
Pigf	0.190377	-0.909464	0.053	0.086	1	6	0.720385
Zfp267	0.707815	-0.908423	0.021	0.027	1	6	0.15008
Ccdc69	0.0316446	-0.908407	0.122	0.205	1	6	1.4997
Cbr4	0.203895	-0.907129	0.058	0.092	1	6	0.690593
Tmem18	0.0925834	-0.906657	0.032	0.07	1	6	1.03347
Zfp697	0.548104	-0.906285	0.005	0.011	1	6	0.261137
Tmem167b	0.141671	-0.900948	0.095	0.141	1	6	0.84872
Ddx43	0.173528	-0.89924	0.005	0.022	1	6	0.76063
Piezo1	0.912068	-0.898492	0.143	0.141	1	6	0.0399728
Crls1	0.0384905	-0.893418	0.074	0.141	1	6	1.41465
Adcy5	0.452054	-0.89102	0.016	0.027	1	6	0.34481
Tjp2	0.39261	-0.890875	0.058	0.081	1	6	0.406039
Ms4a4a	0.394986	-0.890521	0.011	0.022	1	6	0.403418
Slc6a13	0.392548	-0.889959	0.011	0.022	1	6	0.406108
Gnb5	0.449762	-0.889162	0.016	0.027	1	6	0.347018
N4bp2	0.212305	-0.888799	0.222	0.265	1	6	0.67304
Tbc1d9	0.362284	-0.888501	0.053	0.076	1	6	0.440951
Neurl2	0.0570957	-0.888244	0.042	0.092	1	6	1.2434
Isg15	0.651323	-0.887516	0.116	0.13	1	6	0.186203
Pwp2	0.13768	-0.887059	0.032	0.065	1	6	0.861129
Entpd6	0.59716	-0.884118	0.079	0.092	1	6	0.223909
Ttf2	0.763324	-0.883772	0.037	0.043	1	6	0.117291
Gskip	0.00242993	-0.880686	0.153	0.292	1	6	2.61441
Plcb3	0.496786	-0.879213	0.021	0.032	1	6	0.303831
Mfge8	0.348219	-0.87869	0.053	0.076	1	6	0.458147
Ogfod1	0.0525537	-0.878652	0.09	0.151	1	6	1.2794
Txk	0.43407	-0.878307	0.106	0.13	1	6	0.36244
Acsf3	0.634008	-0.877773	0.011	0.016	1	6	0.197905
Fer1l6	0.31019	-0.876432	0.005	0.016	1	6	0.508373
2610021A01Rik	0.469007	-0.87621	0.069	0.086	1	6	0.32882
Gcnt1	0.21987	-0.875935	0.037	0.065	1	6	0.657835
Nde1	0.295682	-0.875684	0.169	0.211	1	6	0.529176
Ighmbp2	0.917655	-0.874652	0.063	0.059	1	6	0.0373207
Ankrd52	0.0804932	-0.873775	0.085	0.141	1	6	1.09424
Wdr90	0.724087	-0.873175	0.026	0.032	1	6	0.14021
Rab32	0.338223	-0.872675	0.021	0.038	1	6	0.470797
Mical1	0.286661	-0.872065	0.085	0.114	1	6	0.542632
Eva1c	0.548104	-0.870185	0.005	0.011	1	6	0.261137
H3c13	0.534549	-0.86915	0.032	0.043	1	6	0.272013
Mapkapk3	0.955444	-0.868873	0.122	0.119	1	6	0.0197947
Gm42715	0.0889465	-0.868492	0.011	0.038	1	6	1.05087
Sppl2b	0.426298	-0.868396	0.09	0.114	1	6	0.370286
Tars	0.0775161	-0.865283	0.085	0.141	1	6	1.11061
Atl1	0.583429	-0.864105	0.037	0.027	1	6	0.234012
Ddb2	0.25667	-0.864067	0.058	0.086	1	6	0.590625
Cep112	0.392548	-0.863691	0.011	0.022	1	6	0.406108
Polr3g	0.128993	-0.863503	0.048	0.086	1	6	0.889433
Zfp563	0.937396	-0.862402	0.037	0.038	1	6	0.0280771
Zfp143	0.783209	-0.862298	0.095	0.103	1	6	0.106123
Pgpep1	0.772218	-0.861224	0.063	0.07	1	6	0.11226
Ralb	0.974116	-0.860827	0.021	0.022	1	6	0.0113893
Cpeb3	0.336577	-0.860507	0.021	0.038	1	6	0.472916
Rap2c	0.460828	-0.860012	0.238	0.259	1	6	0.336461
Fat3	0.435229	-0.858551	0.021	0.011	1	6	0.361283
Cstf1	0.788199	-0.857511	0.069	0.076	1	6	0.103364
Trim39	0.976978	-0.857507	0.106	0.103	1	6	0.0101151
Tmem120a	0.965023	-0.856822	0.048	0.049	1	6	0.0154623
Zcchc8	0.0152389	-0.854586	0.185	0.286	1	6	1.81705
Dcaf15	0.13427	-0.85408	0.101	0.146	1	6	0.87202
Tmem266	0.246237	-0.853519	0.138	0.178	1	6	0.608647
Zfp971	0.250655	-0.853189	0.048	0.076	1	6	0.600924
Slc25a35	0.0616865	-0.851853	0.032	0.076	1	6	1.20981
Apoo	0.018305	-0.851839	0.069	0.146	1	6	1.73743
Dclk2	0.634008	-0.850801	0.011	0.016	1	6	0.197905
Sidt1	0.310767	-0.846851	0.09	0.119	1	6	0.507566
Sestd1	0.691799	-0.845277	0.021	0.027	1	6	0.16002
Zfp276	0.740394	-0.845257	0.042	0.049	1	6	0.130537
Arvcf	0.307637	-0.844283	0.005	0.016	1	6	0.511962
Cntnap1	0.292661	-0.843797	0.016	0.032	1	6	0.533635
Tbc1d17	0.183144	-0.843645	0.111	0.157	1	6	0.737206
Zpr1	0.0186845	-0.842545	0.185	0.281	1	6	1.72852
Ttll13	0.548104	-0.841558	0.005	0.011	1	6	0.261137
Pigh	0.094465	-0.841507	0.116	0.173	1	6	1.02473
Syvn1	0.0706214	-0.841476	0.111	0.173	1	6	1.15106
Tatdn3	0.111306	-0.840884	0.058	0.103	1	6	0.953482
Tex264	0.0489208	-0.839897	0.19	0.276	1	6	1.31051
Ctsw	0.0164726	-0.839162	0.222	0.324	1	6	1.78324
Trim46	0.975452	-0.838822	0.016	0.016	1	6	0.0107942
Dctd	0.675666	-0.837852	0.016	0.011	1	6	0.170268
Srpk1	0.0410485	-0.837335	0.291	0.378	1	6	1.3867
Chst14	0.243801	-0.837032	0.011	0.027	1	6	0.612964
Tmem222	0.00699537	-0.836969	0.212	0.335	1	6	2.15519
Dnal1	0.440659	-0.835758	0.016	0.027	1	6	0.355898
Ms4a6d	0.548104	-0.83561	0.005	0.011	1	6	0.261137
1810065E05Rik	0.311453	-0.835303	0.042	0.065	1	6	0.506608
Emid1	0.0172965	-0.834497	0.127	0.222	1	6	1.76204
Sh2d1a	0.173253	-0.833736	0.042	0.076	1	6	0.76132
Rap1gap	0.548104	-0.833044	0.005	0.011	1	6	0.261137
Lfng	0.208412	-0.832826	0.053	0.027	1	6	0.681078
Slc4a2	0.287836	-0.832631	0.053	0.081	1	6	0.540854
Leo1	0.315034	-0.832179	0.143	0.178	1	6	0.501642
Cox15	0.935055	-0.830232	0.079	0.076	1	6	0.0291628
Zfp937	0.31019	-0.830091	0.005	0.016	1	6	0.508373
Nckipsd	0.0735156	-0.829271	0.175	0.232	1	6	1.13362
Them4	0.230549	-0.827848	0.042	0.07	1	6	0.637237
Tnfrsf25	0.964986	-0.827847	0.021	0.022	1	6	0.0154792
Plk4	0.658474	-0.827523	0.048	0.038	1	6	0.181462
Itga2	0.0889465	-0.827156	0.011	0.038	1	6	1.05087
Gpn3	0.0198885	-0.826697	0.148	0.243	1	6	1.7014
Rassf2	0.0834296	-0.826078	0.164	0.227	1	6	1.07868
Zfp72	0.461289	-0.825818	0.016	0.027	1	6	0.336027
Gm45692	0.307637	-0.82509	0.005	0.016	1	6	0.511962
Slc12a7	0.315661	-0.823347	0.037	0.059	1	6	0.500779
Cblc	0.381966	-0.823191	0.026	0.043	1	6	0.417975
Camk4	0.419152	-0.823055	0.106	0.13	1	6	0.377629
Kntc1	0.630586	-0.821798	0.011	0.016	1	6	0.200256
Nbl1	0.0642133	-0.821362	0.048	0.097	1	6	1.19238
Ndufaf6	0.376497	-0.81903	0.079	0.103	1	6	0.424238
Ppih	0.172782	-0.81854	0.101	0.146	1	6	0.762503
Gprin3	0.733635	-0.816771	0.085	0.092	1	6	0.13452
Ccdc173	0.290888	-0.816476	0.116	0.151	1	6	0.536274
Vangl2	0.256473	-0.816204	0.079	0.114	1	6	0.590958
Camta2	0.0175858	-0.815134	0.106	0.195	1	6	1.75484
Ikbkg	0.159016	-0.814572	0.09	0.135	1	6	0.798558
Gpr15	0.548104	-0.812993	0.005	0.011	1	6	0.261137
Naprt	0.307637	-0.812525	0.005	0.016	1	6	0.511962
Cd81	0.257798	-0.812364	0.026	0.049	1	6	0.58872
Prag1	0.336719	-0.810802	0.048	0.07	1	6	0.472733
Dmac2l	0.743786	-0.810755	0.095	0.103	1	6	0.128552
Mtap	0.569442	-0.810041	0.132	0.108	1	6	0.24455
Syn3	0.307637	-0.809297	0.005	0.016	1	6	0.511962
Ctnnbip1	0.505018	-0.809171	0.09	0.108	1	6	0.296693
Edil3	0.552237	-0.80745	0.005	0.011	1	6	0.257875
Fen1	0.0917213	-0.807298	0.116	0.173	1	6	1.03753
Wiz	0.383112	-0.806774	0.09	0.114	1	6	0.416674
Arl14ep	0.612297	-0.806674	0.079	0.092	1	6	0.213038
Zpbp	0.304595	-0.806457	0.037	0.059	1	6	0.516278
Cuedc1	0.758183	-0.806261	0.058	0.065	1	6	0.120226
Copg1	0.122069	-0.804523	0.217	0.292	1	6	0.913395
Cd63	0.816486	-0.803506	0.032	0.027	1	6	0.088051
Sh2d4a	0.31019	-0.802799	0.005	0.016	1	6	0.508373
Bap1	0.922336	-0.802233	0.074	0.076	1	6	0.0351107
Cryl1	0.020998	-0.800691	0.058	0.13	1	6	1.67782
Rnf26	0.159722	-0.800329	0.037	0.07	1	6	0.796635
Csmd1	0.985006	-0.800268	0.011	0.011	1	6	0.00656103
Zfp780b	0.595468	-0.799489	0.09	0.103	1	6	0.225141
Taf1a	0.447243	-0.799392	0.106	0.13	1	6	0.349456
Naa35	0.111055	-0.798429	0.217	0.276	1	6	0.95446
Cgas	0.634008	-0.797881	0.011	0.016	1	6	0.197905
Ears2	0.132676	-0.797129	0.063	0.108	1	6	0.877206
Zc3h11a	0.372448	-0.796399	0.085	0.114	1	6	0.428934
Rell2	0.243801	-0.795736	0.011	0.027	1	6	0.612964
Rnaset2a	0.00556362	-0.794198	0.307	0.438	1	6	2.25464
Tmed1	0.124774	-0.793766	0.122	0.178	1	6	0.903876
Cse1l	0.0132088	-0.793462	0.201	0.308	1	6	1.87914
Pilra	0.39989	-0.792804	0.011	0.022	1	6	0.39806
Fam3a	0.359691	-0.792462	0.106	0.135	1	6	0.44407
Cdh3	0.548104	-0.791955	0.005	0.011	1	6	0.261137
Camkk1	0.394986	-0.791325	0.011	0.022	1	6	0.403418
Mmp25	0.707004	-0.791103	0.026	0.032	1	6	0.150578
Myo1d	0.576058	-0.790803	0.175	0.151	1	6	0.239534
Xxylt1	0.0193066	-0.789048	0.27	0.357	1	6	1.71429
Fastkd1	0.200558	-0.788492	0.101	0.141	1	6	0.697761
Cib2	0.966808	-0.788277	0.153	0.146	1	6	0.01466
Qser1	0.170406	-0.788229	0.069	0.108	1	6	0.768515
Katnb1	0.555809	-0.78697	0.032	0.043	1	6	0.255074
Mtg2	0.0921467	-0.786613	0.09	0.146	1	6	1.03552
Sae1	0.00309859	-0.786222	0.291	0.427	1	6	2.50884
Itga9	0.245454	-0.786018	0.011	0.027	1	6	0.61003
Scoc	0.234824	-0.785353	0.127	0.168	1	6	0.629258
Zfp949	0.2061	-0.783885	0.032	0.059	1	6	0.685922
Mgl2	0.137161	-0.783534	0.148	0.2	1	6	0.86277
Hgs	0.250307	-0.783107	0.106	0.146	1	6	0.601527
Parp6	0.0830812	-0.782295	0.042	0.086	1	6	1.0805
Gk	0.192991	-0.782283	0.048	0.081	1	6	0.714463
Gm49776	0.552237	-0.782091	0.005	0.011	1	6	0.257875
Fam20a	0.548104	-0.781829	0.005	0.011	1	6	0.261137
Mtrf1	0.722034	-0.781056	0.032	0.038	1	6	0.141442
Gvin1	0.912203	-0.780097	0.058	0.059	1	6	0.0399084
Ecm1	0.0974666	-0.77968	0.005	0.027	1	6	1.01114
Atxn3	0.126782	-0.779484	0.148	0.211	1	6	0.896941
Fam111a	0.34554	-0.777995	0.09	0.119	1	6	0.461501
Smg8	0.0787542	-0.776857	0.016	0.049	1	6	1.10373
Pef1	0.386443	-0.776673	0.095	0.124	1	6	0.412914
Sdhaf2	0.172291	-0.77607	0.19	0.243	1	6	0.763737
Zdhhc18	0.0501942	-0.775598	0.196	0.276	1	6	1.29935
Mrps23	0.00311659	-0.775206	0.259	0.4	1	6	2.50632
Star	0.952819	-0.774992	0.021	0.022	1	6	0.0209896
Gzmm	0.307637	-0.774951	0.005	0.016	1	6	0.511962
Ablim3	0.247114	-0.774929	0.011	0.027	1	6	0.607102
Gm7995	0.634008	-0.773861	0.011	0.016	1	6	0.197905
Acvr2b	0.247191	-0.773695	0.079	0.114	1	6	0.606968
Dffa	0.304595	-0.773189	0.037	0.059	1	6	0.516278
Cip2a	0.715872	-0.77311	0.021	0.027	1	6	0.145165
Enox1	0.980723	-0.772771	0.011	0.011	1	6	0.00845364
Jrk	0.713183	-0.771793	0.021	0.027	1	6	0.146799
Tonsl	0.307637	-0.768864	0.005	0.016	1	6	0.511962
Ets2	0.756895	-0.768063	0.037	0.043	1	6	0.120965
Ect2l	0.552237	-0.767468	0.005	0.011	1	6	0.257875
Taco1	0.232949	-0.765952	0.106	0.146	1	6	0.632739
Gm2000	0.00133886	-0.765698	0.36	0.497	1	6	2.87326
Batf	0.57197	-0.765116	0.201	0.216	1	6	0.242626
Ubiad1	0.318155	-0.765081	0.037	0.059	1	6	0.497361
Ptdss2	0.0500104	-0.764391	0.079	0.146	1	6	1.30094
Ss18l2	0.169475	-0.764384	0.175	0.222	1	6	0.770895
Tpst1	0.307637	-0.764223	0.005	0.016	1	6	0.511962
Zfp932	0.370582	-0.763464	0.026	0.043	1	6	0.431115
Rpgr	0.273114	-0.762977	0.058	0.086	1	6	0.563656
Pcgf3	0.301727	-0.762354	0.101	0.135	1	6	0.520385
Abhd18	0.801613	-0.761448	0.127	0.135	1	6	0.0960354
Tmem87a	0.0798852	-0.761048	0.286	0.351	1	6	1.09753
Unc119b	0.264026	-0.760236	0.122	0.162	1	6	0.578353
Dennd1c	0.859835	-0.759042	0.217	0.216	1	6	0.065585
Gtf2h3	0.221076	-0.758287	0.111	0.151	1	6	0.655458
Ctnnal1	0.343192	-0.758011	0.021	0.038	1	6	0.464463
Zfp593	0.028744	-0.757288	0.201	0.286	1	6	1.54145
Mepce	0.329273	-0.757198	0.138	0.178	1	6	0.482445
Def6	0.0563421	-0.756991	0.175	0.254	1	6	1.24917
Pla2g4a	0.710497	-0.756662	0.021	0.027	1	6	0.148438
Uba3	0.129791	-0.756228	0.122	0.173	1	6	0.886755
Sv2c	0.490304	-0.75572	0.021	0.032	1	6	0.309535
Zfyve19	0.417989	-0.75517	0.159	0.184	1	6	0.378835
Zp1	0.964986	-0.753667	0.021	0.022	1	6	0.0154792
Smim40	0.245948	-0.753053	0.048	0.076	1	6	0.609157
Card19	0.0816427	-0.753014	0.206	0.27	1	6	1.08808
Dennd2a	0.397433	-0.751849	0.011	0.022	1	6	0.400736
Sgf29	0.0852259	-0.750709	0.111	0.173	1	6	1.06943
Catsper2	0.202322	-0.749703	0.032	0.059	1	6	0.693957
Nr2c1	0.336129	-0.749055	0.048	0.07	1	6	0.473494
Slc19a1	0.5055	-0.748458	0.021	0.032	1	6	0.296279
Zfp456	0.68649	-0.746936	0.021	0.027	1	6	0.163366
Smpd4	0.114475	-0.746483	0.042	0.081	1	6	0.941291
Gzma	0.534564	-0.745125	0.063	0.049	1	6	0.272
Gpam	0.422398	-0.744392	0.069	0.092	1	6	0.374278
Gtpbp10	0.274012	-0.743988	0.085	0.119	1	6	0.562231
Slc25a20	0.0691984	-0.743535	0.069	0.124	1	6	1.1599
Rnf43	0.950864	-0.743494	0.026	0.027	1	6	0.0218817
Pde1b	0.694459	-0.743371	0.021	0.027	1	6	0.158354
Hykk	0.552237	-0.742884	0.005	0.011	1	6	0.257875
Alg14	0.0810997	-0.742663	0.095	0.157	1	6	1.09098
Skp2	0.948138	-0.741714	0.026	0.027	1	6	0.0231286
Yod1	0.893624	-0.741576	0.058	0.059	1	6	0.048845
Nrxn2	0.143643	-0.741409	0.085	0.13	1	6	0.842715
Napb	0.97644	-0.741046	0.011	0.011	1	6	0.0103543
Fiz1	0.463765	-0.740888	0.106	0.13	1	6	0.333702
Lipo3	0.132585	-0.740243	0.074	0.119	1	6	0.877506
Thap11	0.0513983	-0.740057	0.069	0.13	1	6	1.28905
Gxylt2	0.630586	-0.739832	0.011	0.016	1	6	0.200256
Cav2	0.56951	-0.739803	0.042	0.054	1	6	0.244499
Rrn3	0.213608	-0.73962	0.132	0.173	1	6	0.670382
Utp11	0.0335811	-0.739524	0.323	0.411	1	6	1.4739
Tbccd1	0.382469	-0.738857	0.069	0.092	1	6	0.417403
Abca7	0.86251	-0.738341	0.27	0.254	1	6	0.0642357
Usf1	0.0374476	-0.738327	0.259	0.341	1	6	1.42658
Prdm10	0.465845	-0.737498	0.169	0.184	1	6	0.331759
Cystm1	0.646309	-0.735924	0.095	0.108	1	6	0.18956
Cstf2	0.0137833	-0.735832	0.206	0.319	1	6	1.86065
Ar	0.292214	-0.735721	0.058	0.086	1	6	0.534298
Rab36	0.634008	-0.735599	0.011	0.016	1	6	0.197905
Por	0.146606	-0.733314	0.116	0.173	1	6	0.833847
Ncr1	0.266462	-0.731581	0.026	0.049	1	6	0.574365
Usp54	0.483463	-0.731233	0.053	0.07	1	6	0.315637
Yipf6	0.0404081	-0.731011	0.164	0.243	1	6	1.39353
Fbxl18	0.583429	-0.731009	0.037	0.027	1	6	0.234012
Ccdc77	0.400154	-0.730692	0.153	0.124	1	6	0.397773
Pstk	0.0536578	-0.729841	0.111	0.189	1	6	1.27037
Atp13a1	0.661372	-0.729817	0.233	0.211	1	6	0.179554
Apol8	0.548104	-0.72932	0.005	0.011	1	6	0.261137
Aatk	0.31019	-0.728338	0.005	0.016	1	6	0.508373
Frmd5	0.637438	-0.72813	0.011	0.016	1	6	0.195562
Bex2	0.552237	-0.726637	0.005	0.011	1	6	0.257875
2310057M21Rik	0.222718	-0.724326	0.037	0.065	1	6	0.652245
Spats2l	0.980723	-0.724152	0.011	0.011	1	6	0.00845364
Slc15a2	0.183854	-0.721405	0.042	0.076	1	6	0.735528
Tmsb15b1	0.504556	-0.7209	0.058	0.076	1	6	0.297091
Chmp1b2	0.934235	-0.719966	0.079	0.076	1	6	0.0295439
Zfp97	0.634008	-0.719753	0.011	0.016	1	6	0.197905
Gps1	0.0763786	-0.718897	0.185	0.254	1	6	1.11703
Smug1	0.708531	-0.718695	0.032	0.038	1	6	0.149641
Kctd16	0.235593	-0.718188	0.021	0.043	1	6	0.627838
Acot7	0.601431	-0.717921	0.042	0.054	1	6	0.220814
Sytl3	0.604707	-0.717625	0.079	0.092	1	6	0.218455
Pde2a	0.683618	-0.716328	0.016	0.022	1	6	0.165186
Pglyrp2	0.2343	-0.716183	0.042	0.07	1	6	0.630227
Pigyl	0.0323213	-0.716067	0.18	0.276	1	6	1.49051
Tuba1a	0.0744643	-0.714697	0.228	0.297	1	6	1.12805
Zfp566	0.634008	-0.714369	0.011	0.016	1	6	0.197905
Elovl1	0.125159	-0.71371	0.164	0.222	1	6	0.90254
Fbxw8	0.67613	-0.71358	0.138	0.157	1	6	0.16997
9130401M01Rik	0.0891684	-0.713475	0.153	0.216	1	6	1.04979
Slc22a15	0.307031	-0.713245	0.037	0.059	1	6	0.512817
Mettl3	0.596348	-0.713013	0.101	0.114	1	6	0.2245
Gpn1	0.048467	-0.712904	0.101	0.168	1	6	1.31455
Fam72a	0.552237	-0.712521	0.005	0.011	1	6	0.257875
Nrp2	0.120529	-0.712382	0.016	0.043	1	6	0.918909
Tarsl2	0.173528	-0.712176	0.005	0.022	1	6	0.76063
Prox2	0.496786	-0.711652	0.021	0.032	1	6	0.303831
Wdr45	0.402707	-0.710257	0.069	0.092	1	6	0.395011
Elovl6	0.0494757	-0.710117	0.127	0.2	1	6	1.30561
Lyrm7	0.757991	-0.70837	0.079	0.086	1	6	0.120336
Rtl6	0.276864	-0.708086	0.058	0.086	1	6	0.557733
Glt1d1	0.630586	-0.7077	0.011	0.016	1	6	0.200256
Endog	0.169408	-0.703954	0.037	0.07	1	6	0.771066
Anpep	0.548104	-0.703784	0.005	0.011	1	6	0.261137
Zfp78	0.634008	-0.703702	0.011	0.016	1	6	0.197905
Sf3b4	0.396148	-0.702339	0.169	0.205	1	6	0.402142
Klhl29	0.630586	-0.701712	0.011	0.016	1	6	0.200256
Evl	0.0449948	-0.701162	0.249	0.335	1	6	1.34684
Alkbh8	0.23172	-0.70071	0.09	0.13	1	6	0.635036
Cst6	0.548104	-0.700399	0.005	0.011	1	6	0.261137
Dpp10	0.073064	-0.699971	0.016	0.049	1	6	1.1363
Emilin1	0.117041	-0.699651	0.079	0.13	1	6	0.931662
Cd19	0.634008	-0.699639	0.011	0.016	1	6	0.197905
Rwdd2b	0.717523	-0.698619	0.032	0.038	1	6	0.144164
Tomm40l	0.608237	-0.697235	0.053	0.065	1	6	0.215927
Foxs1	0.548104	-0.695892	0.005	0.011	1	6	0.261137
Xkr6	0.397433	-0.694366	0.011	0.022	1	6	0.400736
Rnf138rt1	0.548104	-0.694347	0.005	0.011	1	6	0.261137
Sardh	0.722034	-0.694036	0.032	0.038	1	6	0.141442
Atad5	0.559719	-0.693413	0.032	0.043	1	6	0.25203
Ptcra	0.243801	-0.691666	0.011	0.027	1	6	0.612964
Lrp2bp	0.552237	-0.691456	0.005	0.011	1	6	0.257875
Ppil2	0.0126945	-0.689973	0.307	0.422	1	6	1.89638
Cers4	0.860233	-0.687903	0.106	0.097	1	6	0.0653839
Rnf170	0.337562	-0.686951	0.079	0.108	1	6	0.471646
Ctla2a	0.909203	-0.686191	0.085	0.081	1	6	0.0413393
1600012H06Rik	0.221828	-0.686176	0.063	0.097	1	6	0.653984
Actrt3	0.273067	-0.685216	0.053	0.081	1	6	0.56373
Mthfd1l	0.0098847	-0.684269	0.116	0.216	1	6	2.00504
Zfp712	0.339874	-0.684025	0.021	0.038	1	6	0.468682
Zcchc4	0.12186	-0.683925	0.063	0.108	1	6	0.91414
Ngrn	0.193156	-0.683189	0.106	0.151	1	6	0.714092
Foxk2	0.557957	-0.68299	0.19	0.216	1	6	0.253399
Synrg	0.0497746	-0.682923	0.365	0.454	1	6	1.30299
Fam53a	0.0746449	-0.68285	0.111	0.178	1	6	1.127
Mc1r	0.552237	-0.682489	0.005	0.011	1	6	0.257875
Hip1	0.267314	-0.682455	0.106	0.141	1	6	0.572979
Smcr8	0.75275	-0.681837	0.085	0.092	1	6	0.123349
Clmn	0.194463	-0.681799	0.016	0.038	1	6	0.711163
Zfp61	0.741959	-0.680918	0.037	0.043	1	6	0.12962
Kifc3	0.630586	-0.680595	0.011	0.016	1	6	0.200256
Fam118b	0.471845	-0.680349	0.079	0.097	1	6	0.3262
Ccl3	0.979263	-0.680083	0.201	0.2	1	6	0.00910045
Gm14305	0.154987	-0.680043	0.053	0.092	1	6	0.809706
Tirap	0.39989	-0.679258	0.011	0.022	1	6	0.39806
Sec1	0.674663	-0.678401	0.016	0.022	1	6	0.170913
Lin54	0.194051	-0.678364	0.143	0.195	1	6	0.712085
Isoc2a	0.344859	-0.678339	0.021	0.038	1	6	0.462359
Trip6	0.683618	-0.678136	0.016	0.022	1	6	0.165186
Grk4	0.213281	-0.677789	0.079	0.119	1	6	0.671047
Gpr34	0.694459	-0.676842	0.021	0.027	1	6	0.158354
Rit1	0.458828	-0.676193	0.122	0.146	1	6	0.33835
Pgap3	0.400099	-0.674874	0.032	0.049	1	6	0.397832
Fbxo9	0.0532247	-0.673488	0.175	0.249	1	6	1.27389
Zfp874a	0.414271	-0.673346	0.037	0.054	1	6	0.382716
Trpv2	0.25263	-0.673154	0.228	0.276	1	6	0.597516
Il34	0.266462	-0.673128	0.026	0.049	1	6	0.574365
Acad11	0.592705	-0.673004	0.048	0.059	1	6	0.227162
Hypk	0.0166692	-0.672846	0.397	0.492	1	6	1.77808
Flot1	0.0139385	-0.672457	0.153	0.259	1	6	1.85578
Coq2	0.109246	-0.672309	0.317	0.389	1	6	0.961596
Sanbr	0.240763	-0.671422	0.074	0.108	1	6	0.618411
Ecd	0.328282	-0.671106	0.19	0.222	1	6	0.483753
Ralyl	0.31019	-0.670415	0.005	0.016	1	6	0.508373
E2f3	0.44863	-0.669781	0.206	0.178	1	6	0.348112
Actr6	0.200751	-0.669658	0.122	0.162	1	6	0.697343
Tnfsf14	0.504123	-0.669481	0.026	0.016	1	6	0.297463
Ikbip	0.0253019	-0.668915	0.18	0.286	1	6	1.59685
Mrps7	0.0122215	-0.66888	0.339	0.438	1	6	1.91288
Arfip2	0.105798	-0.668631	0.095	0.151	1	6	0.975522
Mea1	0.0409243	-0.667959	0.228	0.324	1	6	1.38802
Rab13	0.552237	-0.667363	0.005	0.011	1	6	0.257875
Cog8	0.212503	-0.66706	0.196	0.238	1	6	0.672635
Wdtc1	0.124217	-0.666705	0.095	0.146	1	6	0.905819
Proser1	0.369377	-0.666229	0.127	0.157	1	6	0.432531
Ccdc51	0.322128	-0.665953	0.042	0.065	1	6	0.491971
Pot1b	0.681803	-0.665755	0.169	0.178	1	6	0.166341
Ccdc58	0.138899	-0.663833	0.18	0.238	1	6	0.857301
Ing4	0.128771	-0.663413	0.28	0.346	1	6	0.890182
Selenon	0.757144	-0.663019	0.048	0.054	1	6	0.120821
Lin37	0.87227	-0.663015	0.19	0.189	1	6	0.0593489
Ppp2r1b	0.68086	-0.662911	0.074	0.086	1	6	0.166942
Tipin	0.1528	-0.662844	0.116	0.173	1	6	0.815877
Tnfrsf21	0.562527	-0.662811	0.042	0.054	1	6	0.249856
Abhd11	0.370432	-0.662741	0.143	0.173	1	6	0.431291
Slc22a5	0.31071	-0.66211	0.037	0.059	1	6	0.507644
Tmem199	0.0836769	-0.662106	0.132	0.2	1	6	1.07739
Eps8l2	0.985006	-0.661577	0.011	0.011	1	6	0.00656103
Myl12b	0.00132547	-0.661222	0.566	0.654	1	6	2.87763
Sh2d2a	0.441709	-0.6599	0.042	0.059	1	6	0.354864
Retreg3	0.415963	-0.659387	0.27	0.297	1	6	0.380946
Zfp286	0.637438	-0.658969	0.011	0.016	1	6	0.195562
Rpap2	0.664812	-0.658581	0.143	0.151	1	6	0.177301
Rassf7	0.526739	-0.658311	0.026	0.038	1	6	0.278404
Epha1	0.490304	-0.657474	0.021	0.032	1	6	0.309535
Trmt2a	0.0297918	-0.657303	0.138	0.227	1	6	1.5259
Pla2g4e	0.683618	-0.656602	0.016	0.022	1	6	0.165186
9930022D16Rik	0.627172	-0.656309	0.011	0.016	1	6	0.202613
Nsd2	0.491224	-0.655559	0.286	0.249	1	6	0.30872
Ahrr	0.548104	-0.655249	0.005	0.011	1	6	0.261137
Kif3a	0.462879	-0.65511	0.042	0.059	1	6	0.334532
Prmt9	0.0467172	-0.655101	0.106	0.173	1	6	1.33052
Washc2	0.253084	-0.654227	0.228	0.265	1	6	0.596736
Rwdd4a	0.333029	-0.65325	0.169	0.205	1	6	0.477518
Spice1	0.968755	-0.65294	0.032	0.032	1	6	0.0137862
Adam22	0.492459	-0.652267	0.021	0.032	1	6	0.307629
Eme2	0.683618	-0.650079	0.016	0.022	1	6	0.165186
Borcs5	0.33372	-0.650043	0.153	0.189	1	6	0.476618
Dhrs3	0.548104	-0.649805	0.005	0.011	1	6	0.261137
Get1	0.233388	-0.649448	0.037	0.065	1	6	0.631922
Zap70	0.100017	-0.648515	0.053	0.097	1	6	0.999928
Ints11	0.248178	-0.647521	0.122	0.162	1	6	0.605237
Zmynd19	0.53131	-0.647325	0.058	0.043	1	6	0.274652
Fbh1	0.104954	-0.647111	0.074	0.124	1	6	0.979
Retsat	0.674663	-0.647059	0.016	0.022	1	6	0.170913
Rnft1	0.187441	-0.647056	0.222	0.27	1	6	0.727134
St6galnac3	0.27757	-0.646877	0.106	0.141	1	6	0.556627
Aurkb	0.640875	-0.645531	0.011	0.016	1	6	0.193226
Cep55	0.402355	-0.645105	0.011	0.022	1	6	0.395391
Slc26a9	0.393726	-0.64298	0.074	0.097	1	6	0.404806
Ppm1j	0.548104	-0.64295	0.005	0.011	1	6	0.261137
Pdik1l	0.418067	-0.642791	0.101	0.124	1	6	0.378754
Thbs3	0.741325	-0.642598	0.021	0.016	1	6	0.129992
Mansc1	0.188769	-0.642472	0.026	0.054	1	6	0.724069
Arhgef18	0.324166	-0.64221	0.217	0.249	1	6	0.489232
Mertk	0.548104	-0.642115	0.005	0.011	1	6	0.261137
Tsr2	0.0621977	-0.641796	0.101	0.168	1	6	1.20623
Ttc13	0.140147	-0.64169	0.175	0.232	1	6	0.853415
Slc25a24	0.347426	-0.641374	0.132	0.097	1	6	0.459138
Gng5c	0.964937	-0.641164	0.016	0.016	1	6	0.0155011
Iqcc	0.974968	-0.640654	0.042	0.043	1	6	0.0110096
Drc3	0.552237	-0.639472	0.005	0.011	1	6	0.257875
Rpap1	0.60635	-0.63928	0.048	0.059	1	6	0.217277
Rflnb	0.552237	-0.637847	0.005	0.011	1	6	0.257875
Atad2	0.325432	-0.637711	0.206	0.243	1	6	0.48754
Racgap1	0.0391663	-0.637574	0.206	0.292	1	6	1.40709
Oxld1	0.53057	-0.637282	0.069	0.086	1	6	0.275257
Cnot11	0.23605	-0.636994	0.127	0.168	1	6	0.626997
Ptprn2	0.968441	-0.636626	0.016	0.016	1	6	0.0139267
Rinl	0.150273	-0.636388	0.19	0.243	1	6	0.823118
Eif3j2	0.552237	-0.636147	0.005	0.011	1	6	0.257875
Cdan1	0.812938	-0.636145	0.09	0.081	1	6	0.0899424
Slc12a9	0.418112	-0.635694	0.196	0.227	1	6	0.378707
Prepl	0.409482	-0.63542	0.095	0.119	1	6	0.387765
Srgap1	0.552237	-0.635236	0.005	0.011	1	6	0.257875
Wsb2	0.273712	-0.633864	0.143	0.178	1	6	0.562707
Rtca	0.406131	-0.633849	0.101	0.124	1	6	0.391334
Urb1	0.217653	-0.632887	0.058	0.092	1	6	0.662236
Crtc2	0.0346014	-0.63161	0.111	0.189	1	6	1.46091
Exosc2	0.90776	-0.631488	0.106	0.097	1	6	0.042029
Ddx27	0.147554	-0.63125	0.196	0.249	1	6	0.831049
Spire1	0.454353	-0.631131	0.016	0.027	1	6	0.342607
Tmem39b	0.155648	-0.630308	0.074	0.119	1	6	0.807855
Ppan	0.141994	-0.62958	0.106	0.157	1	6	0.847729
Zfp27	0.235593	-0.629111	0.021	0.043	1	6	0.627838
Wdr55	0.37234	-0.62894	0.063	0.086	1	6	0.42906
Sap30l	0.297157	-0.628291	0.169	0.205	1	6	0.527013
Tnfsf8	0.765471	-0.628134	0.037	0.043	1	6	0.116071
Kbtbd8	0.97716	-0.627847	0.021	0.022	1	6	0.0100342
Trpc1	0.249489	-0.627387	0.079	0.114	1	6	0.602949
Tsnax	0.04722	-0.627166	0.27	0.351	1	6	1.32587
Vps9d1	0.945234	-0.626621	0.063	0.065	1	6	0.0244605
L3mbtl2	0.188689	-0.626375	0.106	0.151	1	6	0.724254
Ccdc186	0.0213536	-0.626116	0.228	0.335	1	6	1.67053
Zfp39	0.774671	-0.625706	0.042	0.049	1	6	0.110883
Gpn2	0.389016	-0.625626	0.058	0.081	1	6	0.410033
Thrb	0.735625	-0.623518	0.032	0.038	1	6	0.133344
Ccp110	0.267716	-0.623146	0.026	0.049	1	6	0.572326
4930550C14Rik	0.552237	-0.622767	0.005	0.011	1	6	0.257875
Apeh	0.226069	-0.622744	0.101	0.141	1	6	0.64576
Prmt5	0.126723	-0.622271	0.095	0.146	1	6	0.897145
Ly6i	0.452054	-0.622202	0.016	0.027	1	6	0.34481
Tcp11l2	0.0385359	-0.62124	0.148	0.232	1	6	1.41413
Zfp574	0.281601	-0.621083	0.058	0.086	1	6	0.550366
Iah1	0.0293392	-0.621008	0.307	0.416	1	6	1.53255
Rgl2	0.205967	-0.620915	0.09	0.13	1	6	0.686202
Trim62	0.302691	-0.619182	0.016	0.032	1	6	0.519
Zfp273	0.498957	-0.618876	0.021	0.032	1	6	0.301937
C1qtnf12	0.301004	-0.618096	0.016	0.032	1	6	0.521428
Rgs3	0.396955	-0.617284	0.032	0.049	1	6	0.401259
Gm7030	0.501133	-0.617282	0.021	0.032	1	6	0.300047
Gpd2	0.336017	-0.617183	0.238	0.276	1	6	0.473639
Sdr39u1	0.502761	-0.616893	0.106	0.124	1	6	0.298638
Ints2	0.384835	-0.616349	0.079	0.103	1	6	0.414725
Zfp568	0.342056	-0.615677	0.048	0.07	1	6	0.465903
Noct	0.463098	-0.615374	0.048	0.065	1	6	0.334327
Carnmt1	0.267697	-0.61494	0.243	0.292	1	6	0.572356
Arf6	0.0778321	-0.614769	0.328	0.411	1	6	1.10884
Rfx1	0.255691	-0.614413	0.079	0.114	1	6	0.592285
Nbeal2	0.134966	-0.613736	0.032	0.065	1	6	0.869777
Zfp54	0.789859	-0.613628	0.048	0.054	1	6	0.10245
Syne1	0.972997	-0.613457	0.212	0.2	1	6	0.0118885
Rnf44	0.626948	-0.613335	0.222	0.238	1	6	0.202769
Ntng2	0.858147	-0.613155	0.079	0.081	1	6	0.0664382
Cd3d	0.676219	-0.613136	0.148	0.157	1	6	0.169912
Nr1d2	0.192052	-0.612904	0.074	0.114	1	6	0.716582
Rbfa	0.0318707	-0.612448	0.302	0.4	1	6	1.49661
Drg2	0.293271	-0.612442	0.138	0.178	1	6	0.532731
Shld2	0.197191	-0.612389	0.206	0.259	1	6	0.705112
Rnpepl1	0.155843	-0.611911	0.206	0.265	1	6	0.807313
Rnf139	0.220484	-0.611669	0.116	0.157	1	6	0.656624
Eri2	0.953605	-0.610277	0.037	0.038	1	6	0.0206316
Elovl7	0.397433	-0.610265	0.011	0.022	1	6	0.400736
Per3	0.304595	-0.610023	0.037	0.059	1	6	0.516278
Hs3st5	0.39989	-0.609949	0.011	0.022	1	6	0.39806
Ndufa8	0.00908585	-0.609549	0.476	0.562	1	6	2.04163
Uvssa	0.0375067	-0.609498	0.148	0.222	1	6	1.42589
Dcun1d2	0.478124	-0.60917	0.058	0.076	1	6	0.32046
Acy1	0.304385	-0.608669	0.016	0.032	1	6	0.516577
Cpt1a	0.281413	-0.608317	0.09	0.124	1	6	0.550656
Prpf40b	0.289846	-0.607922	0.053	0.081	1	6	0.537833
Zfp956	0.357557	-0.607752	0.053	0.076	1	6	0.446655
Myo1e	0.162456	-0.607633	0.101	0.146	1	6	0.789264
Cotl1	0.184744	-0.60739	0.36	0.411	1	6	0.733429
Rpl3l	0.952819	-0.607291	0.021	0.022	1	6	0.0209896
Sco2	0.063727	-0.607145	0.074	0.135	1	6	1.19568
Nutf2-ps1	0.552237	-0.606911	0.005	0.011	1	6	0.257875
Zfp429	0.175569	-0.606735	0.063	0.103	1	6	0.755553
Ak8	0.32911	-0.606574	0.201	0.238	1	6	0.482659
Mrpl40	0.067482	-0.606318	0.196	0.286	1	6	1.17081
E430018J23Rik	0.503314	-0.605978	0.021	0.032	1	6	0.298161
Ifitm1	0.679185	-0.605904	0.016	0.011	1	6	0.168012
Gipc3	0.409622	-0.605897	0.032	0.049	1	6	0.387617
Gm49325	0.552237	-0.605871	0.005	0.011	1	6	0.257875
Wbp4	0.0513298	-0.60571	0.28	0.357	1	6	1.28963
Spg20	0.285247	-0.605562	0.063	0.092	1	6	0.544779
Met	0.552237	-0.604618	0.005	0.011	1	6	0.257875
Dynlrb2	0.397245	-0.604538	0.037	0.022	1	6	0.400942
Wdr41	0.138889	-0.604257	0.09	0.135	1	6	0.857332
Fam171a2	0.420359	-0.604174	0.037	0.054	1	6	0.37638
Vezt	0.255915	-0.604049	0.106	0.141	1	6	0.591905
Zfp560	0.166842	-0.603155	0.18	0.232	1	6	0.777695
Aste1	0.941869	-0.603051	0.069	0.065	1	6	0.0260095
Smarcd2	0.782736	-0.602687	0.238	0.249	1	6	0.106385
Pin1	0.040763	-0.602656	0.291	0.389	1	6	1.38973
Tomm6	0.439077	-0.602648	0.127	0.151	1	6	0.357459
Camk2a	0.765471	-0.602615	0.037	0.043	1	6	0.116071
Anks6	0.45897	-0.602318	0.016	0.027	1	6	0.338215
Ccrl2	0.557762	-0.601648	0.032	0.043	1	6	0.253551
Arhgef40	0.980723	-0.601285	0.011	0.011	1	6	0.00845364
Pmm1	0.132322	-0.600868	0.106	0.162	1	6	0.878368
Eif2ak4	0.214562	-0.599807	0.122	0.168	1	6	0.668447
Tecpr1	0.0748278	-0.599674	0.249	0.319	1	6	1.12594
Il18bp	0.677643	-0.599529	0.016	0.022	1	6	0.168999
Arhgap27	0.333029	-0.599347	0.249	0.292	1	6	0.477518
Gpr65	0.632898	-0.599014	0.153	0.168	1	6	0.198666
Naa25	0.371377	-0.598068	0.159	0.189	1	6	0.430185
Agtpbp1	0.269606	-0.598065	0.153	0.195	1	6	0.56927
Atp6v0a2	0.181657	-0.59787	0.19	0.243	1	6	0.740747
Mllt11	0.360498	-0.597732	0.09	0.119	1	6	0.443098
Asb2	0.744406	-0.597133	0.021	0.016	1	6	0.12819
Dand5	0.303286	-0.597002	0.063	0.092	1	6	0.518147
Ptov1	0.965547	-0.596417	0.175	0.178	1	6	0.0152266
Dohh	0.0346238	-0.596267	0.143	0.227	1	6	1.46063
Fam78a	0.336894	-0.596112	0.101	0.13	1	6	0.472507
Fancf	0.634008	-0.595412	0.011	0.016	1	6	0.197905
Zfp462	0.402355	-0.59523	0.011	0.022	1	6	0.395391
9030624G23Rik	0.97644	-0.594986	0.011	0.011	1	6	0.0103543
Ube2g2	0.249981	-0.593611	0.175	0.216	1	6	0.602093
Maged2	0.552237	-0.593575	0.005	0.011	1	6	0.257875
Gm50139	0.978958	-0.593522	0.016	0.016	1	6	0.00923602
Zbtb40	0.629538	-0.593101	0.074	0.086	1	6	0.200978
Arhgef12	0.420723	-0.593092	0.074	0.054	1	6	0.376004
Xpnpep2	0.548104	-0.592863	0.005	0.011	1	6	0.261137
Abt1	0.102722	-0.592858	0.138	0.2	1	6	0.988337
Pde12	0.630004	-0.592442	0.074	0.059	1	6	0.200657
Polr1b	0.348208	-0.592421	0.021	0.038	1	6	0.458162
Dok6	0.552237	-0.591901	0.005	0.011	1	6	0.257875
Ccdc92	0.552237	-0.591606	0.005	0.011	1	6	0.257875
Ccne2	0.627172	-0.591161	0.011	0.016	1	6	0.202613
Tubb6	0.686613	-0.590764	0.016	0.022	1	6	0.163288
Tex15	0.189229	-0.590426	0.021	0.005	1	6	0.723012
Wdr24	0.440218	-0.589987	0.042	0.059	1	6	0.356332
Vipr2	0.173528	-0.589804	0.005	0.022	1	6	0.76063
Btd	0.881064	-0.589787	0.101	0.103	1	6	0.0549924
Akr1b10	0.54997	-0.589658	0.032	0.043	1	6	0.259661
Smpd1	0.302171	-0.588953	0.037	0.059	1	6	0.519747
Pan2	0.110397	-0.588916	0.058	0.103	1	6	0.957044
Sugct	0.775602	-0.588727	0.063	0.07	1	6	0.110361
Pick1	0.504123	-0.588682	0.026	0.016	1	6	0.297463
Ddah2	0.401677	-0.58856	0.032	0.049	1	6	0.396123
Zfp169	0.736565	-0.58844	0.085	0.092	1	6	0.132789
Polg	0.580882	-0.588382	0.048	0.059	1	6	0.235912
Krt10	0.178134	-0.588304	0.063	0.103	1	6	0.749253
Prkcsh	0.0162849	-0.587769	0.233	0.341	1	6	1.78822
Dapk3	0.0660567	-0.587327	0.206	0.292	1	6	1.18008
Tbc1d7	0.414271	-0.587284	0.037	0.054	1	6	0.382716
Uaca	0.552237	-0.586729	0.005	0.011	1	6	0.257875
Tnfrsf23	0.454353	-0.585441	0.016	0.027	1	6	0.342607
Akr1c13	0.196828	-0.584153	0.016	0.038	1	6	0.705913
Atp10a	0.471107	-0.583684	0.085	0.108	1	6	0.326881
Pard6b	0.938804	-0.58298	0.032	0.032	1	6	0.0274253
Marchf3	0.479684	-0.582173	0.101	0.124	1	6	0.319045
Hdac6	0.426499	-0.581318	0.037	0.054	1	6	0.370082
Gm44511	0.204835	-0.581272	0.153	0.205	1	6	0.688596
Mdm1	0.58537	-0.581095	0.042	0.054	1	6	0.23257
Fam20b	0.228701	-0.580763	0.212	0.249	1	6	0.640732
Cyb5rl	0.296642	-0.580726	0.032	0.054	1	6	0.527767
Bmpr1a	0.634008	-0.580382	0.011	0.016	1	6	0.197905
Efcab7	0.350464	-0.580171	0.048	0.07	1	6	0.455357
Ebna1bp2	0.0188338	-0.579647	0.317	0.427	1	6	1.72506
Cdkn2b	0.975452	-0.578863	0.016	0.016	1	6	0.0107942
Ikzf3	0.355089	-0.578831	0.27	0.303	1	6	0.449663
Nap1l2	0.552237	-0.578022	0.005	0.011	1	6	0.257875
Noc3l	0.435631	-0.577624	0.132	0.162	1	6	0.360882
Lingo1	0.31019	-0.577423	0.005	0.016	1	6	0.508373
Ankrd13d	0.145219	-0.577214	0.079	0.043	1	6	0.837976
Nelfa	0.0438108	-0.576718	0.111	0.189	1	6	1.35842
Pigc	0.229467	-0.576647	0.037	0.065	1	6	0.639281
Slc12a4	0.4477	-0.575812	0.042	0.059	1	6	0.349013
Ccnk	0.227338	-0.575566	0.238	0.297	1	6	0.643329
Tjp3	0.946201	-0.574814	0.053	0.054	1	6	0.0240167
Vps45	0.134477	-0.574757	0.095	0.146	1	6	0.871352
Pdcd2l	0.141111	-0.574678	0.312	0.368	1	6	0.850438
Pgs1	0.0165442	-0.574272	0.212	0.324	1	6	1.78135
S100a1	0.964502	-0.571912	0.026	0.027	1	6	0.0156969
Ppa1	0.236036	-0.571292	0.153	0.2	1	6	0.627021
Phpt1	0.390641	-0.57119	0.153	0.184	1	6	0.408222
Fgf13	0.45237	-0.570879	0.106	0.13	1	6	0.344506
Flii	0.0517433	-0.570739	0.249	0.33	1	6	1.28615
B9d1	0.556385	-0.570689	0.005	0.011	1	6	0.254625
Pdcd7	0.197699	-0.57042	0.148	0.195	1	6	0.703996
Selp	0.45897	-0.570156	0.016	0.027	1	6	0.338215
Aldoa	0.00188497	-0.569682	0.566	0.665	1	6	2.72469
Ecsit	0.27178	-0.569528	0.143	0.184	1	6	0.565783
Rnf7	0.00401251	-0.569467	0.434	0.627	1	6	2.39658
Pou5f2	0.346531	-0.569351	0.021	0.038	1	6	0.460258
Klc2	0.622984	-0.568858	0.042	0.032	1	6	0.205523
Cdca7l	0.369528	-0.56876	0.148	0.114	1	6	0.432353
Tmem276	0.272102	-0.568493	0.053	0.081	1	6	0.565269
Dach2	0.461289	-0.568349	0.016	0.027	1	6	0.336027
Ulbp1	0.365572	-0.5675	0.058	0.081	1	6	0.437028
Fastkd2	0.360232	-0.567388	0.048	0.07	1	6	0.443417
Abhd5	0.804654	-0.567357	0.069	0.076	1	6	0.0943906
Pprc1	0.754986	-0.566963	0.095	0.103	1	6	0.122061
Sclt1	0.579731	-0.566883	0.143	0.162	1	6	0.236773
Pnpla7	0.0233572	-0.566773	0.333	0.443	1	6	1.63158
Cfap74	0.634008	-0.566624	0.011	0.016	1	6	0.197905
Gm21972	0.503314	-0.56632	0.021	0.032	1	6	0.298161
Ppif	0.0857582	-0.566258	0.434	0.486	1	6	1.06672
Coq6	0.479026	-0.566069	0.063	0.081	1	6	0.319641
Hsdl2	0.046571	-0.565832	0.19	0.27	1	6	1.33188
Dclk1	0.680628	-0.565651	0.016	0.022	1	6	0.16709
Tbx3	0.552237	-0.565308	0.005	0.011	1	6	0.257875
Polr2f	0.0276083	-0.564796	0.407	0.503	1	6	1.55896
Pggt1b	0.168199	-0.564631	0.238	0.286	1	6	0.774177
Pdha1	0.0473087	-0.564354	0.233	0.319	1	6	1.32506
Sass6	0.62641	-0.564299	0.053	0.065	1	6	0.203141
Sorcs2	0.553859	-0.563718	0.032	0.043	1	6	0.2566
Ttc9c	0.765797	-0.563627	0.201	0.211	1	6	0.115887
Mxi1	0.633207	-0.563442	0.079	0.092	1	6	0.198454
B4galt3	0.968312	-0.563287	0.116	0.114	1	6	0.0139847
Gsdme	0.631803	-0.563145	0.079	0.092	1	6	0.199418
Sumf1	0.73013	-0.562508	0.18	0.184	1	6	0.1366
Etv5	0.719191	-0.562192	0.026	0.032	1	6	0.143155
Ugdh	0.140602	-0.562116	0.101	0.151	1	6	0.852008
Cc2d1b	0.0850883	-0.561738	0.101	0.157	1	6	1.07013
Arntl	0.0617828	-0.561651	0.116	0.189	1	6	1.20913
Bcl2	0.247034	-0.560998	0.169	0.211	1	6	0.607242
Elp3	0.224863	-0.560967	0.127	0.173	1	6	0.648083
Pdlim7	0.677643	-0.560941	0.016	0.022	1	6	0.168999
Tmem71	0.128747	-0.560921	0.127	0.178	1	6	0.890264
Nol6	0.34654	-0.560364	0.101	0.13	1	6	0.460247
Mettl15	0.169524	-0.560042	0.127	0.178	1	6	0.770769
Cpsf4l	0.552237	-0.559943	0.005	0.011	1	6	0.257875
Amigo3	0.97644	-0.559765	0.011	0.011	1	6	0.0103543
Nfya	0.0769436	-0.559584	0.212	0.286	1	6	1.11383
Gm17571	0.634008	-0.559357	0.011	0.016	1	6	0.197905
Gstm1	0.707815	-0.559276	0.021	0.027	1	6	0.15008
Tcp11	0.31019	-0.559257	0.005	0.016	1	6	0.508373
Phb2	0.025967	-0.559099	0.46	0.562	1	6	1.58558
ENSMUSG00000079222	0.556385	-0.558345	0.005	0.011	1	6	0.254625
Farsa	0.0142035	-0.55809	0.153	0.259	1	6	1.8476
B3galt2	0.634008	-0.557886	0.011	0.016	1	6	0.197905
Cluh	0.19437	-0.557598	0.095	0.141	1	6	0.711371
Fabp5	0.837244	-0.557044	0.127	0.119	1	6	0.0771481
H2ac20	0.823393	-0.55702	0.063	0.07	1	6	0.0843927
Dzip1	0.528788	-0.556862	0.026	0.038	1	6	0.276719
Pdgfa	0.0884215	-0.556681	0.111	0.173	1	6	1.05344
Abca8b	0.31019	-0.555717	0.005	0.016	1	6	0.508373
Fhl3	0.452054	-0.555404	0.016	0.027	1	6	0.34481
Gm527	0.803818	-0.555296	0.032	0.027	1	6	0.0948424
Klhdc1	0.46687	-0.555044	0.201	0.232	1	6	0.330804
Psen2	0.712733	-0.554745	0.148	0.13	1	6	0.147073
Lysmd4	0.899247	-0.55467	0.09	0.092	1	6	0.0461209
Dse	0.120383	-0.554166	0.196	0.259	1	6	0.919436
Mospd2	0.771607	-0.553746	0.143	0.13	1	6	0.112604
Fbxo32	0.476322	-0.553694	0.053	0.07	1	6	0.3221
Fkbp1a	0.16389	-0.552639	0.407	0.459	1	6	0.785447
Fkbp3	0.0111121	-0.552571	0.476	0.595	1	6	1.9542
Creld1	0.313179	-0.552359	0.037	0.059	1	6	0.504207
Skap1	0.251435	-0.55224	0.164	0.205	1	6	0.599574
Itk	0.711536	-0.551651	0.148	0.162	1	6	0.147803
Lix1	0.496786	-0.551178	0.021	0.032	1	6	0.303831
Yes1	0.683618	-0.551048	0.016	0.022	1	6	0.165186
Pvr	0.399228	-0.551011	0.159	0.195	1	6	0.398779
Fancd2	0.58537	-0.5504	0.042	0.054	1	6	0.23257
Ube2e2	0.294173	-0.550364	0.058	0.086	1	6	0.531398
Il17c	0.721638	-0.550159	0.026	0.032	1	6	0.141681
Ikzf5	0.741075	-0.549916	0.148	0.157	1	6	0.130138
Avpi1	0.613928	-0.549399	0.063	0.076	1	6	0.211883
Dhx57	0.234518	-0.549059	0.222	0.276	1	6	0.629823
Cyp26b1	0.674663	-0.548075	0.016	0.022	1	6	0.170913
Serpinc1	0.154827	-0.548039	0.127	0.178	1	6	0.810154
Tmem65	0.33427	-0.547808	0.175	0.211	1	6	0.475902
Oas1b	0.967231	-0.547201	0.026	0.027	1	6	0.0144698
Mdga1	0.39989	-0.546165	0.011	0.022	1	6	0.39806
Exosc8	0.236657	-0.54578	0.286	0.324	1	6	0.62588
Hcfc1	0.295307	-0.545595	0.185	0.222	1	6	0.529727
Slfn1	0.738247	-0.545386	0.021	0.016	1	6	0.131798
Tmem218	0.276223	-0.545185	0.148	0.189	1	6	0.558741
Ccni	0.0244885	-0.544973	0.439	0.514	1	6	1.61104
Cchcr1	0.636415	-0.544782	0.042	0.032	1	6	0.196259
Pik3r6	0.31019	-0.54453	0.005	0.016	1	6	0.508373
Bckdhb	0.88184	-0.54424	0.228	0.216	1	6	0.0546102
Kcng1	0.552237	-0.544163	0.005	0.011	1	6	0.257875
Zfp366	0.683618	-0.544093	0.016	0.022	1	6	0.165186
Zfc3h1	0.254708	-0.543966	0.407	0.432	1	6	0.593957
Atg9a	0.972152	-0.543549	0.063	0.065	1	6	0.0122658
H1f2	0.313891	-0.543512	0.418	0.438	1	6	0.503221
Sytl1	0.262186	-0.543327	0.085	0.119	1	6	0.581391
Col20a1	0.534957	-0.543137	0.026	0.038	1	6	0.271681
Hax1	0.554935	-0.542782	0.153	0.173	1	6	0.255758
Acap1	0.208976	-0.542774	0.302	0.357	1	6	0.679903
Nhlrc3	0.766074	-0.542612	0.085	0.092	1	6	0.115729
Armcx2	0.699481	-0.542304	0.116	0.124	1	6	0.155224
Map7	0.121548	-0.542116	0.101	0.151	1	6	0.915253
Phf10	0.222119	-0.54194	0.175	0.216	1	6	0.653414
Fdx1	0.446396	-0.541785	0.238	0.259	1	6	0.35028
Metap1	0.118807	-0.541471	0.153	0.216	1	6	0.925158
Chd3	0.426486	-0.541275	0.254	0.303	1	6	0.370095
Anln	0.552237	-0.5412	0.005	0.011	1	6	0.257875
2810004N23Rik	0.109593	-0.541193	0.153	0.222	1	6	0.960219
Egf	0.488153	-0.541121	0.021	0.032	1	6	0.311444
Mafg	0.882525	-0.540927	0.159	0.157	1	6	0.0542731
Nabp1	0.83606	-0.540132	0.243	0.249	1	6	0.0777625
Rbm17	0.208537	-0.539843	0.36	0.4	1	6	0.680818
Bloc1s6	0.47156	-0.539489	0.132	0.157	1	6	0.326463
Rab5c	0.0352157	-0.53931	0.407	0.486	1	6	1.45326
Uba7	0.778088	-0.539139	0.196	0.205	1	6	0.108971
Gfus	0.988846	-0.538885	0.19	0.189	1	6	0.00487153
Ccdc124	0.189516	-0.538483	0.339	0.384	1	6	0.722355
Cab39l	0.21337	-0.538186	0.291	0.346	1	6	0.670866
Fah	0.971946	-0.537754	0.016	0.016	1	6	0.0123577
Zfp420	0.596402	-0.537536	0.037	0.027	1	6	0.224461
Cacna2d1	0.552237	-0.537309	0.005	0.011	1	6	0.257875
Zscan2	0.426499	-0.537202	0.037	0.054	1	6	0.370082
Csgalnact2	0.267525	-0.537168	0.138	0.184	1	6	0.572635
3300002I08Rik	0.144117	-0.536606	0.048	0.086	1	6	0.841286
Iqcn	0.724087	-0.535973	0.026	0.032	1	6	0.14021
Actr3b	0.671688	-0.53597	0.016	0.022	1	6	0.172832
Strip2	0.359002	-0.535474	0.048	0.07	1	6	0.444903
Zcchc17	0.0161554	-0.535307	0.28	0.389	1	6	1.79168
Clec2m	0.206266	-0.53429	0.053	0.086	1	6	0.685571
Exoc1	0.31413	-0.533902	0.169	0.211	1	6	0.50289
Smarcc2	0.100748	-0.533828	0.27	0.341	1	6	0.996765
Tbc1d2	0.596574	-0.53377	0.037	0.049	1	6	0.224336
Keap1	0.608569	-0.533467	0.233	0.254	1	6	0.21569
Prkcq	0.363255	-0.533044	0.106	0.135	1	6	0.439789
Lck	0.163143	-0.532737	0.116	0.168	1	6	0.787432
Prdm5	0.637438	-0.531659	0.011	0.016	1	6	0.195562
Scyl1	0.674063	-0.531465	0.095	0.108	1	6	0.1713
Leng1	0.923222	-0.531099	0.153	0.151	1	6	0.0346937
Mcrip2	0.566651	-0.531088	0.037	0.049	1	6	0.246684
Camk2g	0.458379	-0.52986	0.238	0.265	1	6	0.338775
Ap3d1	0.165901	-0.529681	0.312	0.368	1	6	0.780152
Manea	0.211507	-0.529651	0.169	0.227	1	6	0.674675
Ccdc86	0.584293	-0.529636	0.106	0.119	1	6	0.233369
Agrn	0.552237	-0.528878	0.005	0.011	1	6	0.257875
Rhd	0.299323	-0.528834	0.016	0.032	1	6	0.52386
Gstp3	0.476783	-0.528779	0.042	0.059	1	6	0.32168
Miga2	0.683618	-0.528658	0.016	0.022	1	6	0.165186
Ndufaf1	0.636505	-0.528532	0.101	0.114	1	6	0.196198
Gpr63	0.556385	-0.528378	0.005	0.011	1	6	0.254625
Vipas39	0.380892	-0.528341	0.153	0.189	1	6	0.419198
D17H6S53E	0.348208	-0.527819	0.021	0.038	1	6	0.458162
Tmsb10b	0.3051	-0.527727	0.058	0.086	1	6	0.515558
Gm21762	0.000685122	-0.527645	0.831	0.865	1	6	3.16423
Nlgn2	0.552237	-0.526429	0.005	0.011	1	6	0.257875
Arrdc2	0.336944	-0.526228	0.085	0.114	1	6	0.472442
Zdhhc23	0.622574	-0.526106	0.122	0.135	1	6	0.205809
Tmem176b	0.523529	-0.525214	0.143	0.162	1	6	0.281059
Ero1a	0.628552	-0.525041	0.159	0.173	1	6	0.201659
Cep57l1	0.732348	-0.524725	0.196	0.205	1	6	0.135283
Rev1	0.448183	-0.523727	0.164	0.195	1	6	0.348545
Pex19	0.222955	-0.523056	0.18	0.227	1	6	0.651783
Zfp128	0.552237	-0.523035	0.005	0.011	1	6	0.257875
Actl6a	0.060764	-0.522969	0.28	0.357	1	6	1.21635
Cd79b	0.00549144	-0.522292	0.307	0.454	1	6	2.26031
Azin2	0.724087	-0.521954	0.026	0.032	1	6	0.14021
Pithd1	0.104385	-0.521311	0.127	0.189	1	6	0.981362
Man2b2	0.180842	-0.521218	0.101	0.146	1	6	0.742701
Dhrs13	0.31019	-0.521057	0.005	0.016	1	6	0.508373
Slc39a2	0.556385	-0.520931	0.005	0.011	1	6	0.254625
Mef2b	0.285383	-0.520797	0.116	0.151	1	6	0.544572
Xpnpep1	0.535176	-0.520472	0.153	0.173	1	6	0.271503
Golm2	0.936426	-0.52047	0.058	0.059	1	6	0.0285264
Kbtbd4	0.719191	-0.519983	0.026	0.032	1	6	0.143155
Tg	0.94453	-0.519906	0.042	0.043	1	6	0.0247843
Timm44	0.262474	-0.519863	0.175	0.211	1	6	0.580914
Cd160	0.594403	-0.519785	0.048	0.059	1	6	0.225919
Anxa1	0.946529	-0.51972	0.048	0.049	1	6	0.0238661
Agbl5	0.832862	-0.519719	0.037	0.032	1	6	0.0794272
Akr7a5	0.314714	-0.519605	0.101	0.135	1	6	0.502083
Ndufs7	0.00174315	-0.519051	0.487	0.632	1	6	2.75866
Ccdc17	0.961943	-0.518964	0.021	0.022	1	6	0.0168506
Slc39a8	0.637438	-0.518773	0.011	0.016	1	6	0.195562
Ccdc15	0.43947	-0.518737	0.095	0.119	1	6	0.35707
Pigb	0.484898	-0.518544	0.053	0.07	1	6	0.314349
Btbd16	0.637438	-0.517723	0.011	0.016	1	6	0.195562
Masp2	0.581586	-0.517319	0.011	0.005	1	6	0.235386
Rnf122	0.0078696	-0.516213	0.45	0.6	1	6	2.10405
Slc52a3	0.759036	-0.515622	0.037	0.043	1	6	0.119738
Zfp687	0.852651	-0.515615	0.042	0.038	1	6	0.0692286
Sit1	0.122143	-0.515329	0.09	0.141	1	6	0.913131
Mettl5	0.979739	-0.514996	0.122	0.119	1	6	0.0088896
Poglut2	0.650595	-0.514706	0.048	0.038	1	6	0.186689
Evi2	0.503146	-0.514447	0.058	0.076	1	6	0.298306
Mdp1	0.143321	-0.513388	0.365	0.422	1	6	0.843691
Agap1	0.534957	-0.513347	0.026	0.038	1	6	0.271681
Stip1	0.603883	-0.512462	0.286	0.308	1	6	0.219047
Tnnt1	0.552237	-0.512377	0.005	0.011	1	6	0.257875
Cetn3	0.00882106	-0.512351	0.386	0.503	1	6	2.05448
Brwd3	0.154798	-0.512169	0.164	0.227	1	6	0.810233
Trim41	0.881072	-0.512031	0.116	0.119	1	6	0.0549884
Tmem186	0.753849	-0.512018	0.074	0.081	1	6	0.122716
Tulp2	0.637438	-0.511964	0.011	0.016	1	6	0.195562
Vopp1	0.318095	-0.511915	0.095	0.124	1	6	0.497443
Cct6b	0.971946	-0.511791	0.016	0.016	1	6	0.0123577
Zbtb44	0.26368	-0.511767	0.212	0.254	1	6	0.578922
Rsu1	0.253928	-0.51143	0.444	0.465	1	6	0.59529
Dusp2	0.667518	-0.511407	0.217	0.184	1	6	0.175537
Nmral1	0.975251	-0.510919	0.127	0.119	1	6	0.0108834
Gcm2	0.414434	-0.510887	0.032	0.049	1	6	0.382545
Rfc4	0.76213	-0.510574	0.074	0.065	1	6	0.117971
S1pr4	0.131787	-0.510237	0.243	0.308	1	6	0.880126
Rpp21	0.193282	-0.510014	0.37	0.422	1	6	0.713808
Brf1	0.0746062	-0.509942	0.206	0.281	1	6	1.12722
Gpr4	0.677643	-0.5096	0.016	0.022	1	6	0.168999
Lnx2	0.90058	-0.509478	0.127	0.119	1	6	0.0454779
Nck2	0.922337	-0.509187	0.079	0.081	1	6	0.0351106
Sipa1l2	0.167375	-0.50855	0.095	0.141	1	6	0.776308
Nmnat2	0.498957	-0.507624	0.021	0.032	1	6	0.301937
Nup93	0.176728	-0.506989	0.085	0.13	1	6	0.752694
Dtx4	0.496127	-0.506904	0.058	0.076	1	6	0.304407
Fance	0.363255	-0.506837	0.106	0.135	1	6	0.439789
Edc4	0.379051	-0.506696	0.111	0.141	1	6	0.421302
Oscp1	0.552237	-0.506599	0.005	0.011	1	6	0.257875
Rbks	0.532154	-0.506016	0.153	0.13	1	6	0.273962
Gpsm3	0.00890828	-0.505958	0.497	0.595	1	6	2.05021
Primpol	0.19317	-0.505505	0.148	0.195	1	6	0.71406
Recql	0.230544	-0.505238	0.122	0.162	1	6	0.637246
Bin2	0.0404747	-0.505005	0.402	0.514	1	6	1.39282
Gtf3c5	0.548031	-0.504904	0.032	0.043	1	6	0.261195
Rnf150	0.552237	-0.504819	0.005	0.011	1	6	0.257875
Ssrp1	0.183359	-0.504731	0.349	0.405	1	6	0.736697
Cat	0.147874	-0.504395	0.27	0.335	1	6	0.830108
Gga3	0.322699	-0.504295	0.143	0.184	1	6	0.491202
Filip1	0.468966	-0.504113	0.048	0.065	1	6	0.328859
Spef2	0.596103	-0.504101	0.048	0.059	1	6	0.224679
Sco1	0.316906	-0.504044	0.037	0.059	1	6	0.499069
Flcn	0.52408	-0.503653	0.09	0.108	1	6	0.280603
Prodh	0.343489	-0.503351	0.085	0.114	1	6	0.464087
S1pr1	0.275089	-0.502566	0.09	0.124	1	6	0.560527
Apba3	0.469238	-0.501861	0.053	0.07	1	6	0.328606
Etaa1	0.537077	-0.501835	0.085	0.103	1	6	0.269964
Ppp2r5d	0.387197	-0.501809	0.074	0.097	1	6	0.412068
Mpzl3	0.137147	-0.501793	0.153	0.211	1	6	0.862812
Gm28043	0.552237	-0.501358	0.005	0.011	1	6	0.257875
Ndst2	0.728187	-0.500978	0.069	0.076	1	6	0.137757
Prr14	0.215215	-0.500776	0.185	0.238	1	6	0.667127
Adprs	0.251203	-0.500372	0.153	0.195	1	6	0.599976
Rasal1	0.735174	-0.500296	0.021	0.016	1	6	0.13361
Ppp1r12c	0.78531	-0.499217	0.19	0.173	1	6	0.104959
Fgd4	0.348208	-0.498957	0.021	0.038	1	6	0.458162
Coq4	0.360232	-0.498807	0.048	0.07	1	6	0.443417
Slc16a7	0.621985	-0.498572	0.132	0.146	1	6	0.20622
Gna15	0.0204128	-0.498179	0.46	0.584	1	6	1.6901
Akt1s1	0.0689127	-0.497826	0.069	0.124	1	6	1.1617
Gsto2	0.53909	-0.497471	0.026	0.038	1	6	0.268339
Kbtbd12	0.31019	-0.497248	0.005	0.016	1	6	0.508373
P2ry6	0.495063	-0.497156	0.143	0.162	1	6	0.305339
Gm7609	0.728414	-0.496712	0.042	0.049	1	6	0.137622
Slc27a4	0.186883	-0.496595	0.026	0.054	1	6	0.728431
Vmac	0.463098	-0.496497	0.048	0.065	1	6	0.334327
Fdps	0.846419	-0.496474	0.291	0.286	1	6	0.0724145
Gm45844	0.679185	-0.496227	0.016	0.011	1	6	0.168012
Atg14	0.475012	-0.495662	0.138	0.162	1	6	0.323296
Zc3h10	0.297057	-0.495468	0.095	0.13	1	6	0.52716
Tektip1	0.876133	-0.495374	0.053	0.049	1	6	0.0574301
Rpp14	0.149162	-0.495082	0.095	0.146	1	6	0.826343
Zbtb10	0.185049	-0.494944	0.333	0.389	1	6	0.732712
1700029J07Rik	0.818774	-0.494873	0.037	0.032	1	6	0.0868357
Atp6v1c1	0.0328533	-0.49485	0.402	0.476	1	6	1.48342
Ebpl	0.0106221	-0.494542	0.333	0.481	1	6	1.97379
Tnfaip2	0.806348	-0.49451	0.032	0.027	1	6	0.0934777
Myd88	0.357255	-0.493535	0.169	0.2	1	6	0.447021
Mrm3	0.265212	-0.493185	0.026	0.049	1	6	0.576407
Phf2	0.115431	-0.492928	0.27	0.335	1	6	0.937679
Ppp1r8	0.715616	-0.492922	0.111	0.097	1	6	0.14532
Ubl4a	0.0581134	-0.492475	0.169	0.249	1	6	1.23572
Galnt12	0.835078	-0.492197	0.228	0.222	1	6	0.0782732
Pycard	0.0028823	-0.491892	0.677	0.795	1	6	2.54026
Sox13	0.770359	-0.491476	0.026	0.022	1	6	0.113307
Il15ra	0.93971	-0.49142	0.037	0.038	1	6	0.0270063
Rnaset2b	0.0882245	-0.491321	0.392	0.465	1	6	1.05441
Prdx3	0.987999	-0.491198	0.286	0.281	1	6	0.00524347
Afg3l2	0.461328	-0.490795	0.116	0.141	1	6	0.33599
Ifit1bl1	0.31019	-0.49065	0.005	0.016	1	6	0.508373
Prpsap2	0.142508	-0.490615	0.169	0.232	1	6	0.846159
Fhip2a	0.543868	-0.490541	0.291	0.314	1	6	0.264506
Edc3	0.169549	-0.490378	0.132	0.184	1	6	0.770704
5730522E02Rik	0.2474	-0.490282	0.063	0.097	1	6	0.606601
Il4i1	0.76695	-0.490001	0.069	0.076	1	6	0.115233
Rexo1	0.81782	-0.489556	0.254	0.238	1	6	0.0873425
Dop1b	0.264551	-0.489006	0.169	0.216	1	6	0.57749
Nudt18	0.0646488	-0.488599	0.153	0.232	1	6	1.18944
Josd2	0.198211	-0.488405	0.206	0.265	1	6	0.702873
Rab3ip	0.211692	-0.488266	0.286	0.341	1	6	0.674296
Ankrd54	0.230356	-0.487032	0.106	0.146	1	6	0.6376
Nkapd1	0.301631	-0.486533	0.185	0.222	1	6	0.520524
Igf2bp3	0.997679	-0.486422	0.037	0.038	1	6	0.0010092
Mybbp1a	0.307645	-0.486374	0.212	0.254	1	6	0.51195
Pdk1	0.466509	-0.48621	0.138	0.168	1	6	0.33114
L3mbtl4	0.637438	-0.486049	0.011	0.016	1	6	0.195562
Slc25a22	0.664293	-0.485899	0.069	0.081	1	6	0.17764
Fstl3	0.875003	-0.485863	0.09	0.092	1	6	0.0579902
Enthd1	0.640875	-0.485681	0.011	0.016	1	6	0.193226
Abcf2	0.59872	-0.485256	0.143	0.162	1	6	0.222776
Cabcoco1	0.592794	-0.48492	0.037	0.049	1	6	0.227096
Ccl4	0.924379	-0.484916	0.566	0.497	1	6	0.03415
Mrps28	0.11783	-0.484848	0.386	0.449	1	6	0.928745
Mrps18a	0.0590856	-0.484675	0.339	0.411	1	6	1.22852
Enox2	0.0982717	-0.484598	0.291	0.357	1	6	1.00757
Vps37c	0.563395	-0.484138	0.122	0.135	1	6	0.249187
Mrpl22	0.274526	-0.483936	0.196	0.238	1	6	0.561417
Rhno1	0.789383	-0.483648	0.143	0.151	1	6	0.102712
Clk3	0.274314	-0.483613	0.312	0.346	1	6	0.561752
Socs3	0.799442	-0.483248	0.164	0.168	1	6	0.097213
Tesk2	0.48203	-0.483195	0.053	0.07	1	6	0.316926
Apip	0.281811	-0.483014	0.217	0.259	1	6	0.550041
Tmem33	0.436756	-0.482991	0.302	0.33	1	6	0.359761
Utp15	0.215543	-0.482289	0.132	0.178	1	6	0.666466
Ptger2	0.552237	-0.482279	0.005	0.011	1	6	0.257875
Prim1	0.759036	-0.481804	0.037	0.043	1	6	0.119738
Oat	0.137008	-0.481439	0.185	0.249	1	6	0.863255
Ift57	0.138073	-0.481122	0.296	0.357	1	6	0.85989
Nlrp1b	0.710497	-0.48103	0.021	0.027	1	6	0.148438
Clspn	0.964937	-0.481024	0.016	0.016	1	6	0.0155011
Smim6	0.567943	-0.480794	0.132	0.151	1	6	0.245695
Prickle3	0.604812	-0.480629	0.063	0.076	1	6	0.21838
Uchl5	0.148831	-0.480629	0.397	0.481	1	6	0.827306
Kctd2	0.084182	-0.480448	0.116	0.184	1	6	1.07478
Afmid	0.637438	-0.480062	0.011	0.016	1	6	0.195562
Shisa5	0.0845389	-0.479833	0.614	0.681	1	6	1.07294
Thumpd3	0.417071	-0.479556	0.328	0.357	1	6	0.37979
Prmt6	0.597586	-0.479536	0.101	0.114	1	6	0.2236
Btbd8	0.4121	-0.479249	0.169	0.2	1	6	0.384997
Zbtb11	0.289029	-0.478524	0.344	0.395	1	6	0.539059
Pla1a	0.189229	-0.477993	0.021	0.005	1	6	0.723012
Mrpl20	0.227739	-0.477971	0.529	0.589	1	6	0.642563
Arhgap4	0.185655	-0.477662	0.212	0.265	1	6	0.731293
Kdsr	0.709953	-0.477238	0.18	0.189	1	6	0.148771
Fhod1	0.740174	-0.47693	0.032	0.038	1	6	0.130666
Mtarc2	0.0646563	-0.476897	0.503	0.578	1	6	1.18939
Baiap2l2	0.640875	-0.476595	0.011	0.016	1	6	0.193226
Scart1	0.650595	-0.476123	0.048	0.038	1	6	0.186689
E2f5	0.410338	-0.475634	0.074	0.097	1	6	0.386859
Rbm41	0.851366	-0.475632	0.164	0.162	1	6	0.0698836
Htra2	0.891483	-0.475321	0.106	0.108	1	6	0.0498867
Il27ra	0.475424	-0.475241	0.132	0.157	1	6	0.322919
Ogfod2	0.317054	-0.473896	0.063	0.092	1	6	0.498867
Mterf2	0.609174	-0.473864	0.058	0.07	1	6	0.215259
Nagpa	0.512844	-0.4738	0.101	0.119	1	6	0.290014
Ampd2	0.528788	-0.473432	0.026	0.038	1	6	0.276719
Acaca	0.362621	-0.473235	0.143	0.178	1	6	0.440547
AU022252	0.740388	-0.472494	0.09	0.097	1	6	0.130541
Pmpcb	0.139124	-0.47206	0.185	0.249	1	6	0.856598
Pheta2	0.552237	-0.471868	0.005	0.011	1	6	0.257875
Ccdc84	0.541474	-0.471594	0.079	0.097	1	6	0.266422
Blm	0.919483	-0.471524	0.079	0.076	1	6	0.0364561
Zfp704	0.480351	-0.471325	0.063	0.081	1	6	0.318441
Brpf3	0.71595	-0.471201	0.106	0.119	1	6	0.145117
Gimap3	0.665315	-0.471127	0.111	0.124	1	6	0.176973
Arrdc4	0.587895	-0.470888	0.106	0.119	1	6	0.2307
App	0.38203	-0.470634	0.185	0.216	1	6	0.417903
AW554918	0.333012	-0.470397	0.386	0.411	1	6	0.47754
Ttl	0.556385	-0.470342	0.005	0.011	1	6	0.254625
Ap2a1	0.790986	-0.469489	0.185	0.189	1	6	0.101831
Ripk3	0.459821	-0.469487	0.042	0.059	1	6	0.337411
Hapstr1	0.512126	-0.469323	0.296	0.319	1	6	0.290624
Cbx8	0.5685	-0.469249	0.037	0.049	1	6	0.24527
H2bc18	0.724293	-0.469056	0.032	0.038	1	6	0.140085
Ttc39c	0.680628	-0.468569	0.016	0.022	1	6	0.16709
Mrpl4	0.204252	-0.46839	0.28	0.319	1	6	0.689834
Emc6	0.00499752	-0.468327	0.46	0.605	1	6	2.30125
Pofut1	0.183734	-0.468311	0.122	0.173	1	6	0.73581
Arsk	0.621632	-0.468025	0.09	0.103	1	6	0.206467
Ksr1	0.971946	-0.467888	0.016	0.016	1	6	0.0123577
Rrnad1	0.16942	-0.467706	0.116	0.168	1	6	0.771036
Rdh14	0.439205	-0.467603	0.169	0.2	1	6	0.357333
Qtrt1	0.316845	-0.467585	0.233	0.265	1	6	0.499153
Mtg1	0.386631	-0.467553	0.058	0.081	1	6	0.412703
Psmb10	0.0117526	-0.467293	0.651	0.724	1	6	1.92987
Carf	0.190691	-0.466755	0.048	0.081	1	6	0.71967
Tbc1d10c	0.266067	-0.465635	0.386	0.422	1	6	0.575009
Gm49380	0.980723	-0.465387	0.011	0.011	1	6	0.00845364
Pfdn1	0.0557228	-0.465174	0.36	0.432	1	6	1.25397
Ercc1	0.232993	-0.464763	0.127	0.168	1	6	0.632657
Pop4	0.373707	-0.46471	0.159	0.189	1	6	0.427468
Cherp	0.0510454	-0.464624	0.164	0.249	1	6	1.29204
Ciao1	0.401427	-0.464598	0.074	0.097	1	6	0.396393
Cstad	0.463614	-0.464507	0.016	0.027	1	6	0.333843
Lyar	0.270017	-0.463893	0.222	0.27	1	6	0.568609
Rps19bp1	0.164176	-0.463844	0.233	0.286	1	6	0.784691
Nsmf	0.713183	-0.463778	0.021	0.027	1	6	0.146799
Usf3	0.351857	-0.463723	0.259	0.292	1	6	0.453634
Steep1	0.173458	-0.463197	0.175	0.227	1	6	0.760806
Nae1	0.0641522	-0.463151	0.095	0.162	1	6	1.19279
Dpagt1	0.265304	-0.462877	0.085	0.119	1	6	0.576256
Limk1	0.649377	-0.462749	0.106	0.119	1	6	0.187503
Rangrf	0.498928	-0.462581	0.058	0.076	1	6	0.301962
Slc39a13	0.571945	-0.462324	0.069	0.054	1	6	0.242646
Gpr174	0.188163	-0.461551	0.175	0.227	1	6	0.725465
0610010K14Rik	0.576415	-0.461105	0.228	0.249	1	6	0.239265
Sbf1	0.335461	-0.461034	0.116	0.151	1	6	0.474358
Rsad1	0.724087	-0.460832	0.026	0.032	1	6	0.14021
Zfp963	0.556385	-0.460475	0.005	0.011	1	6	0.254625
Zg16	0.581586	-0.459913	0.011	0.005	1	6	0.235386
Pex14	0.0197453	-0.459887	0.323	0.422	1	6	1.70454
Nfia	0.921599	-0.459623	0.196	0.178	1	6	0.0354581
Larp7	0.277733	-0.459079	0.228	0.27	1	6	0.556372
Zbtb25	0.240759	-0.458715	0.111	0.151	1	6	0.618418
Slc20a1	0.234008	-0.458648	0.206	0.259	1	6	0.630769
Plaat3	0.118666	-0.458398	0.397	0.454	1	6	0.925673
Kif9	0.760493	-0.458371	0.09	0.097	1	6	0.118905
St6galnac4	0.169966	-0.457703	0.132	0.189	1	6	0.769637
Taf5	0.508799	-0.457629	0.058	0.076	1	6	0.293454
Coil	0.303547	-0.457579	0.111	0.146	1	6	0.517775
Tpcn1	0.463614	-0.45692	0.016	0.027	1	6	0.333843
Rsph10b	0.964937	-0.45682	0.016	0.016	1	6	0.0155011
Zfand2b	0.23138	-0.456724	0.116	0.162	1	6	0.635675
Zfp775	0.461289	-0.455505	0.016	0.027	1	6	0.336027
Gm20458	0.634008	-0.455168	0.011	0.016	1	6	0.197905
Traf4	0.0563002	-0.45444	0.238	0.324	1	6	1.24949
Csrnp2	0.683618	-0.454245	0.016	0.022	1	6	0.165186
Tnfrsf14	0.791201	-0.454198	0.032	0.027	1	6	0.101713
Proser3	0.526739	-0.454157	0.026	0.038	1	6	0.278404
Tiam2	0.634008	-0.453898	0.011	0.016	1	6	0.197905
Sh3bp5l	0.138147	-0.453438	0.048	0.086	1	6	0.85966
Usp31	0.934215	-0.453365	0.048	0.049	1	6	0.0295532
Dvl2	0.957885	-0.452896	0.079	0.081	1	6	0.0186865
Mettl22	0.302822	-0.452545	0.069	0.097	1	6	0.518812
Cpsf1	0.592027	-0.452452	0.116	0.097	1	6	0.227658
Aifm2	0.97644	-0.452337	0.011	0.011	1	6	0.0103543
Sertad3	0.65606	-0.452169	0.159	0.173	1	6	0.183057
Akap8	0.0608861	-0.452147	0.339	0.416	1	6	1.21548
Yrdc	0.106542	-0.452121	0.196	0.27	1	6	0.972478
Ddx55	0.282316	-0.451999	0.185	0.222	1	6	0.549264
Fam91a1	0.0804957	-0.451941	0.349	0.422	1	6	1.09423
Crygn	0.97644	-0.451477	0.011	0.011	1	6	0.0103543
Polr1a	0.193428	-0.450402	0.063	0.103	1	6	0.713481
Cep76	0.739833	-0.449981	0.037	0.043	1	6	0.130866
Kif18a	0.810455	-0.449976	0.127	0.135	1	6	0.0912713
Nr4a3	0.974392	-0.449204	0.127	0.13	1	6	0.0112663
Cdk10	0.689818	-0.449176	0.132	0.114	1	6	0.161266
Tmem104	0.782777	-0.449156	0.058	0.065	1	6	0.106362
B3gnt5	0.598577	-0.448883	0.037	0.027	1	6	0.22288
Phtf1	0.177039	-0.448492	0.18	0.232	1	6	0.75193
Mrto4	0.290902	-0.448428	0.254	0.286	1	6	0.536253
Dock5	0.291619	-0.448266	0.032	0.054	1	6	0.535184
BC147527	0.236057	-0.448175	0.508	0.53	1	6	0.626982
Cyb561d2	0.268644	-0.447825	0.159	0.2	1	6	0.570822
Polr2e	0.0760237	-0.447547	0.444	0.497	1	6	1.11905
Slc24a5	0.416045	-0.447277	0.032	0.049	1	6	0.38086
Gid8	0.0523127	-0.447241	0.217	0.303	1	6	1.28139
Mrpl12	0.0628024	-0.44723	0.333	0.422	1	6	1.20202
Kcnc1	0.682711	-0.44703	0.016	0.011	1	6	0.165763
Kbtbd3	0.579667	-0.446562	0.101	0.119	1	6	0.236822
Pdia4	0.135797	-0.446389	0.481	0.519	1	6	0.867109
Actn4	0.455461	-0.445621	0.317	0.351	1	6	0.341549
Anapc16	0.221491	-0.445438	0.429	0.476	1	6	0.654643
Arfrp1	0.976316	-0.445049	0.27	0.254	1	6	0.0104096
Vps26c	0.347301	-0.444121	0.127	0.162	1	6	0.459294
Setd6	0.692801	-0.44386	0.058	0.049	1	6	0.159391
Fbxw9	0.943442	-0.443725	0.063	0.065	1	6	0.025285
Atf3	0.196713	-0.44363	0.217	0.276	1	6	0.706168
Vps4b	0.252513	-0.442573	0.429	0.465	1	6	0.597716
Cep72	0.957568	-0.442387	0.042	0.043	1	6	0.0188306
Decr2	0.433657	-0.442103	0.111	0.086	1	6	0.362854
Tle3	0.107269	-0.441874	0.328	0.4	1	6	0.969528
Pus7	0.604959	-0.441658	0.053	0.065	1	6	0.218274
Ifngr1	0.113358	-0.441557	0.344	0.438	1	6	0.945548
Bbs2	0.259285	-0.441182	0.048	0.076	1	6	0.586222
Rnf144b	0.397433	-0.441148	0.011	0.022	1	6	0.400736
Rftn2	0.980723	-0.440725	0.011	0.011	1	6	0.00845364
Yipf2	0.555866	-0.440722	0.122	0.141	1	6	0.25503
Ctdsp1	0.211398	-0.440273	0.18	0.232	1	6	0.6749
Cuta	0.0642669	-0.440204	0.577	0.627	1	6	1.19201
P2rx7	0.410253	-0.440146	0.175	0.205	1	6	0.386949
Desi1	0.302852	-0.439462	0.222	0.259	1	6	0.51877
Tssc4	0.2883	-0.43942	0.079	0.114	1	6	0.540155
Bicral	0.231198	-0.439228	0.339	0.378	1	6	0.636016
Prep	0.606143	-0.438693	0.138	0.157	1	6	0.217425
Snrk	0.247541	-0.437752	0.206	0.254	1	6	0.606353
Slc4a8	0.299323	-0.437307	0.016	0.032	1	6	0.52386
Mtres1	0.743638	-0.436552	0.063	0.07	1	6	0.128639
Mrpl37	0.799091	-0.436542	0.127	0.135	1	6	0.0974037
Bahd1	0.866234	-0.436516	0.053	0.049	1	6	0.0623647
Wdr18	0.256546	-0.436497	0.201	0.249	1	6	0.590834
Anapc10	0.334766	-0.436406	0.238	0.276	1	6	0.475258
Lat	0.822165	-0.436353	0.153	0.157	1	6	0.0850411
Aida	0.234693	-0.436012	0.116	0.157	1	6	0.629501
Nmnat3	0.399638	-0.435946	0.111	0.141	1	6	0.398333
Erap1	0.811787	-0.435826	0.265	0.259	1	6	0.0905581
Rrp1	0.0180601	-0.435599	0.365	0.492	1	6	1.74328
Usp36	0.253643	-0.435532	0.159	0.205	1	6	0.595777
E4f1	0.539341	-0.435456	0.148	0.119	1	6	0.268137
Rrp12	0.931324	-0.435333	0.069	0.065	1	6	0.0308993
Mical2	0.45897	-0.435038	0.016	0.027	1	6	0.338215
Elac2	0.247143	-0.434099	0.058	0.092	1	6	0.607052
Mapk7	0.395233	-0.43394	0.063	0.086	1	6	0.403147
Eef1e1	0.29362	-0.433875	0.196	0.238	1	6	0.532214
Tomm5	0.00607903	-0.433652	0.54	0.67	1	6	2.21617
Sct	0.625032	-0.43313	0.058	0.07	1	6	0.204098
Itgav	0.165508	-0.433121	0.175	0.232	1	6	0.781181
Mphosph10	0.557247	-0.432225	0.296	0.297	1	6	0.253952
Cptp	0.97542	-0.43184	0.026	0.027	1	6	0.0108083
Arfgap2	0.0825334	-0.431784	0.317	0.416	1	6	1.08337
P3h3	0.514293	-0.431648	0.021	0.032	1	6	0.288789
Adsl	0.480848	-0.431479	0.159	0.184	1	6	0.317992
R3hcc1	0.380419	-0.43133	0.085	0.114	1	6	0.419738
Samd15	0.627077	-0.43116	0.048	0.059	1	6	0.202679
Dnajb14	0.216694	-0.431131	0.429	0.503	1	6	0.664152
Psmd4	0.0924458	-0.43108	0.561	0.632	1	6	1.03411
Cenpt	0.69979	-0.430262	0.021	0.027	1	6	0.155032
Hirip3	0.384255	-0.430226	0.058	0.081	1	6	0.41538
Rgs1	0.31103	-0.43002	0.492	0.53	1	6	0.507198
Gatd3a	0.924259	-0.429969	0.265	0.243	1	6	0.0342064
Ndrg3	0.678118	-0.429356	0.116	0.13	1	6	0.168695
Abca2	0.890671	-0.429242	0.127	0.13	1	6	0.0502828
Epb41l4b	0.97644	-0.429039	0.011	0.011	1	6	0.0103543
Nmd3	0.648312	-0.429017	0.249	0.265	1	6	0.188216
Dixdc1	0.97644	-0.429004	0.011	0.011	1	6	0.0103543
Enoph1	0.48916	-0.428799	0.058	0.076	1	6	0.310549
Cox19	0.353374	-0.428726	0.201	0.232	1	6	0.451765
Mfsd3	0.388566	-0.428363	0.026	0.043	1	6	0.410535
H2bc7	0.463614	-0.42821	0.016	0.027	1	6	0.333843
Mtln	0.0903573	-0.428165	0.328	0.405	1	6	1.04404
Cd84	0.834425	-0.427961	0.09	0.081	1	6	0.0786125
Tsc2	0.654028	-0.427883	0.09	0.076	1	6	0.184404
Ahr	0.244264	-0.42782	0.317	0.368	1	6	0.612141
Adgra3	0.689613	-0.427588	0.016	0.022	1	6	0.161394
Jmjd7	0.343192	-0.427545	0.021	0.038	1	6	0.464463
Ripk2	0.719892	-0.427277	0.201	0.205	1	6	0.142733
Rgs2	0.0769508	-0.426978	0.46	0.568	1	6	1.11379
Tmem164	0.242934	-0.426915	0.291	0.341	1	6	0.614513
Aifm1	0.369928	-0.426909	0.153	0.184	1	6	0.431883
Fam53b	0.439616	-0.426334	0.212	0.249	1	6	0.356926
Sash1	0.638492	-0.426147	0.042	0.032	1	6	0.194844
Noxo1	0.634008	-0.426055	0.011	0.016	1	6	0.197905
Heatr5a	0.273648	-0.426004	0.138	0.178	1	6	0.562808
Cage1	0.678898	-0.425895	0.138	0.151	1	6	0.168195
Haus4	0.980119	-0.42583	0.127	0.124	1	6	0.00872099
Zcchc18	0.989286	-0.425787	0.09	0.092	1	6	0.0046782
Fbxw5	0.485956	-0.425728	0.106	0.13	1	6	0.313403
Phf1	0.818611	-0.425632	0.143	0.13	1	6	0.0869226
Natd1	0.613225	-0.424512	0.048	0.059	1	6	0.21238
Dnase2a	0.474424	-0.424345	0.153	0.173	1	6	0.323833
Fam131a	0.503314	-0.424324	0.021	0.032	1	6	0.298161
Nsmce4a	0.235778	-0.424315	0.423	0.459	1	6	0.627497
Ppp1r35	0.037477	-0.424101	0.212	0.303	1	6	1.42623
Nqo2	0.275223	-0.423943	0.063	0.038	1	6	0.560316
Pank4	0.507546	-0.42366	0.053	0.038	1	6	0.294524
Slc35c1	0.616675	-0.423588	0.048	0.059	1	6	0.209944
Nid2	0.637438	-0.423304	0.011	0.016	1	6	0.195562
Spry1	0.94878	-0.423133	0.032	0.032	1	6	0.0228346
Maip1	0.297465	-0.423024	0.148	0.189	1	6	0.526565
Thap7	0.845422	-0.422895	0.148	0.151	1	6	0.0729263
Tbc1d12	0.203541	-0.422836	0.085	0.124	1	6	0.691348
Eif2b3	0.691603	-0.422642	0.111	0.124	1	6	0.160143
Dusp22	0.40573	-0.422576	0.201	0.157	1	6	0.391763
Bin3	0.0724665	-0.422318	0.418	0.486	1	6	1.13986
Ap1s1	0.13796	-0.422314	0.196	0.259	1	6	0.860246
Lgals8	0.114603	-0.421923	0.185	0.254	1	6	0.940806
Mmab	0.793326	-0.421877	0.074	0.081	1	6	0.100548
Snrnp40	0.940937	-0.421382	0.402	0.395	1	6	0.0264394
Ccdc28b	0.255327	-0.420914	0.18	0.222	1	6	0.592903
Abhd4	0.377802	-0.420763	0.09	0.119	1	6	0.422735
Topors	0.556403	-0.420557	0.254	0.27	1	6	0.25461
Klrk1	0.577317	-0.420457	0.095	0.114	1	6	0.238585
Tmem208	0.188913	-0.420325	0.434	0.486	1	6	0.723739
[truncated: 7,666 more rows]

## Sheet: WT naïve vs WT ECTV clu8 iMOs
	p_val	avg_log2FC	pct.1	pct.2	p_val_adj	cluster		high in naïve WT (-)	high in WT ECTV 1 dpi (+)
Cadm2	0.0130317	-5.52922	0	0.028	1	8
Birc5	0.0216778	-4.59391	0	0.024	1	8
Dennd2b	0.0216778	-4.26508	0	0.024	1	8
Sulf1	0.0363206	-4.19438	0	0.02	1	8
Fam169a	0.105887	-4.15396	0	0.012	1	8
Fblim1	0.105887	-4.12409	0	0.012	1	8
Prcd	0.105887	-3.961	0	0.012	1	8
Rhoc	0.0130317	-3.9422	0	0.028	1	8
Fgf14	0.0615039	-3.91742	0	0.016	1	8
Hsd17b14	0.105887	-3.90848	0	0.012	1	8
4933430I17Rik	0.105887	-3.785	0	0.012	1	8
Pcyox1l	0.386293	-3.77568	0.005	0.012	1	8
Gstm5	0.0506956	-3.75352	0.005	0.028	1	8
Akap6	0.0363206	-3.74251	0	0.02	1	8
Asgr2	0.0216778	-3.73189	0	0.024	1	8
Jrk	0.0615039	-3.69852	0	0.016	1	8
Cntnap2	0.231408	-3.67769	0.005	0.016	1	8
Rnf43	0.013909	-3.67376	0.009	0.049	1	8
Hmga1b	0.0363206	-3.64354	0	0.02	1	8
Klri2	0.00046585	-3.63103	0.009	0.077	1	8
Alg6	0.00714133	-3.62608	0.005	0.045	1	8
Srgap1	0.761084	-3.62083	0.009	0.012	1	8
Grid1	0.138351	-3.6018	0.005	0.02	1	8
Il18bp	0.274774	-3.58165	0.023	0.04	1	8
Elovl7	0.0615039	-3.5495	0	0.016	1	8
Cacnb3	0.0189034	-3.52939	0.005	0.036	1	8
Ryr3	0.0115262	-3.5268	0.005	0.04	1	8
Gstm2	0.105887	-3.51426	0	0.012	1	8
Kcnip1	0.00787359	-3.51099	0	0.032	1	8
Akap1	0.0363206	-3.50444	0	0.02	1	8
Gnb4	0.00357934	-3.47276	0.009	0.061	1	8
Ift122	0.0836113	-3.43506	0.005	0.024	1	8
Gzma	0.147324	-3.43359	0.047	0.077	1	8
Nrip3	0.0615039	-3.40172	0	0.016	1	8
Eno2	0.105887	-3.38356	0	0.012	1	8
Ppp1r9a	0.0363206	-3.37397	0	0.02	1	8
Dpysl3	0.383911	-3.36851	0.005	0.012	1	8
Zfp870	0.0847976	-3.36689	0.005	0.024	1	8
Ppp1r3f	0.386293	-3.28707	0.005	0.012	1	8
Arhgef40	0.0130317	-3.28103	0	0.028	1	8
Btbd16	0.105887	-3.2669	0	0.012	1	8
Gk5	0.137448	-3.25494	0.009	0.028	1	8
Neo1	0.0842028	-3.24366	0.005	0.024	1	8
A430033K04Rik	0.216759	-3.22091	0.009	0.024	1	8
Crppa	0.105887	-3.21703	0	0.012	1	8
Prf1	0.000259669	-3.20179	0.019	0.101	1	8
Creld1	0.0836113	-3.16371	0.005	0.024	1	8
H2bc7	0.279805	-3.1276	0.023	0.04	1	8
Clec9a	0.0554609	-3.0954	0.009	0.036	1	8
Septin4	0.0615039	-3.0885	0	0.016	1	8
Cntn3	0.105887	-3.08311	0	0.012	1	8
Zmat4	0.0506956	-3.08027	0.005	0.028	1	8
Ndnf	0.0870112	-3.07032	0.009	0.032	1	8
Scn3a	0.0363206	-3.0694	0	0.02	1	8
Ifit2	0.000223047	-3.06009	0.042	0.142	1	8
Abca17	0.0615039	-3.04899	0	0.016	1	8
Klra8	0.000249226	-3.048	0.005	0.073	1	8
Etv3l	0.105887	-3.04615	0	0.012	1	8
Gfi1	0.0317302	-3.03668	0.005	0.032	1	8
Tpmt	0.0315937	-3.03495	0.019	0.057	1	8
Clec1b	0.0853959	-3.02688	0.005	0.024	1	8
Plpp1	0.00841932	-3.01419	0.009	0.053	1	8
Pex11a	0.105887	-3.00722	0	0.012	1	8
Notch4	0.0615039	-2.99926	0	0.016	1	8
Tctn1	0.86703	-2.99141	0.014	0.012	1	8
Zfp526	0.506442	-2.97248	0.009	0.016	1	8
Hspg2	0.0615039	-2.97176	0	0.016	1	8
Niban3	0.336651	-2.97084	0.009	0.02	1	8
Gspt2	0.21561	-2.95101	0.009	0.024	1	8
Plat	0.383911	-2.94784	0.005	0.012	1	8
Ccdc18	0.231408	-2.94347	0.005	0.016	1	8
Celsr3	0.383911	-2.90614	0.005	0.012	1	8
Zfp213	0.00787359	-2.90475	0	0.032	1	8
Suox	0.0130317	-2.90292	0	0.028	1	8
Ankrd35	0.105887	-2.87879	0	0.012	1	8
Ccnb1ip1	0.842945	-2.87118	0.042	0.045	1	8
Flacc1	0.0363206	-2.86414	0	0.02	1	8
Camk2n1	0.0189034	-2.85357	0.005	0.036	1	8
Slc6a20b	0.105887	-2.8495	0	0.012	1	8
Gnb1l	0.0363206	-2.84376	0	0.02	1	8
Phf11d	0.000218447	-2.82654	0.056	0.162	1	8
Ms4a1	0.21561	-2.82547	0.009	0.024	1	8
Krt7	0.185062	-2.82413	0.014	0.032	1	8
Klra7	0.00245123	-2.81107	0.014	0.073	1	8
Rasgrp3	0.105887	-2.80034	0	0.012	1	8
Phactr3	0.0363206	-2.79819	0	0.02	1	8
Megf11	0.0847976	-2.79509	0.005	0.024	1	8
Top1mt	0.192176	-2.79364	0.014	0.032	1	8
Enpep	0.232931	-2.78011	0.005	0.016	1	8
H2bc15	0.232931	-2.76308	0.005	0.016	1	8
Ift43	0.139302	-2.75004	0.005	0.02	1	8
Klre1	0.00808177	-2.74701	0.023	0.077	1	8
Actr3b	0.764055	-2.73042	0.009	0.012	1	8
Aplnr	0.0363206	-2.71759	0	0.02	1	8
Ubqln4	0.12542	-2.71257	0.037	0.069	1	8
Ncald	0.00703354	-2.70617	0.005	0.045	1	8
Colec12	0.00456518	-2.68486	0.005	0.049	1	8
Tmigd3	0.105887	-2.67722	0	0.012	1	8
Klra4	0.0224523	-2.67052	0.009	0.045	1	8
Sult2b1	0.00460017	-2.66998	0.005	0.049	1	8
Gzmb	0.0842389	-2.66149	0.014	0.04	1	8
Spata24	0.383911	-2.66057	0.005	0.012	1	8
Zfp955b	0.0357214	-2.65518	0.014	0.049	1	8
C1qtnf6	0.383911	-2.65169	0.005	0.012	1	8
Klra1	0.105887	-2.65112	0	0.012	1	8
Arhgap28	0.00936079	-2.64713	0.014	0.061	1	8
Pde6h	0.605618	-2.64105	0.014	0.02	1	8
Eml5	0.00096857	-2.64086	0.014	0.081	1	8
Ankrd24	0.0853959	-2.61909	0.005	0.024	1	8
Or6d12	0.764055	-2.61672	0.009	0.012	1	8
Dscaml1	0.0842028	-2.60345	0.005	0.024	1	8
Cr2	0.231408	-2.59987	0.005	0.016	1	8
Fzd7	0.280989	-2.59093	0.014	0.028	1	8
Knstrn	0.383911	-2.58828	0.005	0.012	1	8
Tnni2	0.0460269	-2.58338	0.023	0.061	1	8
Nmnat1	0.334993	-2.57134	0.009	0.02	1	8
Loxl3	0.0880386	-2.57108	0.009	0.032	1	8
Htr7	0.0557948	-2.56881	0.014	0.045	1	8
Fads1	0.139781	-2.56314	0.009	0.028	1	8
Parm1	0.231408	-2.55121	0.005	0.016	1	8
Angptl4	0.105887	-2.54369	0	0.012	1	8
Angpt1	0.00655067	-2.54345	0.014	0.065	1	8
Card10	0.0363206	-2.53504	0	0.02	1	8
Cfb	0.0080546	-2.53335	0.028	0.085	1	8
Patl2	0.203181	-2.53319	0.023	0.045	1	8
Ppm1f	0.0518024	-2.52372	0.005	0.028	1	8
Zfp420	0.338314	-2.52321	0.009	0.02	1	8
Hddc3	0.339982	-2.52152	0.009	0.02	1	8
Hs1bp3	0.287983	-2.52014	0.023	0.04	1	8
Gm1043	0.0363206	-2.51999	0	0.02	1	8
Cul7	0.0317302	-2.50074	0.005	0.032	1	8
Klc2	0.0521758	-2.49894	0.005	0.028	1	8
Kcnk10	0.383911	-2.49284	0.005	0.012	1	8
Tlr11	0.138351	-2.48156	0.005	0.02	1	8
Dnm3	0.592726	-2.47543	0.014	0.02	1	8
Phf11a	0.0143479	-2.44255	0.037	0.093	1	8
Rpap1	0.00908051	-2.43981	0.014	0.061	1	8
Prr33	0.105887	-2.43933	0	0.012	1	8
Crygn	0.0363206	-2.43683	0	0.02	1	8
Arfip2	0.144378	-2.43342	0.033	0.061	1	8
Lrrc51	0.872638	-2.42847	0.014	0.012	1	8
Kazn	0.0836113	-2.42176	0.005	0.024	1	8
Tlcd1	0.0564802	-2.42129	0.009	0.036	1	8
Tnnt3	0.22023	-2.41446	0.009	0.024	1	8
Zfp267	0.088556	-2.41344	0.009	0.032	1	8
Tmem150a	0.231408	-2.4073	0.005	0.016	1	8
Clstn1	0.339982	-2.40358	0.009	0.02	1	8
Lipt2	0.607779	-2.38077	0.014	0.02	1	8
Gca	0.0239348	-2.37845	0.047	0.101	1	8
Art3	0.812591	-2.37816	0.037	0.032	1	8
Adgb	0.0359221	-2.37658	0.014	0.049	1	8
Lratd2	0.422261	-2.3756	0.014	0.024	1	8
Procr	0.418894	-2.37505	0.014	0.024	1	8
Car2	0.221875	-2.37174	0.037	0.061	1	8
Cyp2u1	0.383911	-2.36998	0.005	0.012	1	8
Pdgfa	0.483289	-2.36965	0.019	0.028	1	8
Dok6	0.546934	-2.36666	0.023	0.032	1	8
Sez6l2	0.0615039	-2.36624	0	0.016	1	8
2810459M11Rik	0.0191865	-2.366	0.005	0.036	1	8
Rpusd1	0.331693	-2.3598	0.009	0.02	1	8
Phpt1	0.00414455	-2.35683	0.023	0.085	1	8
Itm2a	0.088556	-2.35621	0.009	0.032	1	8
Zfp791	0.140257	-2.35353	0.005	0.02	1	8
Tagln	0.0615039	-2.35302	0	0.016	1	8
Zfp867	0.386293	-2.35197	0.005	0.012	1	8
Zfp523	0.219068	-2.34601	0.009	0.024	1	8
Adam22	0.0102028	-2.34291	0.037	0.097	1	8
Uevld	0.00941776	-2.34156	0.014	0.061	1	8
Stmn1	0.176223	-2.33708	0.037	0.065	1	8
Gm21972	0.71692	-2.33146	0.023	0.028	1	8
Ldb2	0.0615039	-2.3233	0	0.016	1	8
Mfsd4b5	0.105887	-2.31719	0	0.012	1	8
Mdc1	0.00500425	-2.31454	0.042	0.113	1	8
Ctla2a	0.00898792	-2.31278	0.051	0.117	1	8
Fam118a	0.0589593	-2.30837	0.028	0.065	1	8
Cmya5	0.418894	-2.30833	0.014	0.024	1	8
Rab30	0.0336277	-2.30061	0.019	0.057	1	8
Ttc39a	0.0363206	-2.30014	0	0.02	1	8
Kcng3	0.0880386	-2.29582	0.009	0.032	1	8
Acot1	0.0363206	-2.29239	0	0.02	1	8
Wdr77	0.0155626	-2.28873	0.023	0.073	1	8
Oas2	0.000303398	-2.28174	0.084	0.202	1	8
Ctnna3	0.0615039	-2.28065	0	0.016	1	8
Ttc36	0.0354475	-2.27862	0.009	0.04	1	8
Smcr8	0.10853	-2.27528	0.042	0.077	1	8
Pomt1	0.888602	-2.27382	0.019	0.02	1	8
Rapsn	0.105887	-2.27335	0	0.012	1	8
Zdhhc19	0.0615039	-2.27279	0	0.016	1	8
Dpysl5	0.105887	-2.27049	0	0.012	1	8
Etl4	0.140257	-2.26591	0.005	0.02	1	8
Dsn1	0.212192	-2.25892	0.009	0.024	1	8
Klrg1	0.0363206	-2.25714	0	0.02	1	8
Dusp28	0.0853959	-2.2536	0.005	0.024	1	8
Klhl14	0.761084	-2.24834	0.009	0.012	1	8
Ptp4a1.1	0.886297	-2.24374	0.019	0.02	1	8
Efna5	0.0321969	-2.2384	0.005	0.032	1	8
Fasl	0.0880386	-2.23631	0.009	0.032	1	8
Kcnip4	0.388684	-2.23466	0.005	0.012	1	8
Abhd14b	0.138222	-2.22751	0.009	0.028	1	8
Cyb561a3	0.00705139	-2.22456	0.037	0.101	1	8
Serpinb9b	0.0615039	-2.21705	0	0.016	1	8
Mapkapk5	0.534027	-2.21689	0.023	0.032	1	8
Nagk	0.00390958	-2.21551	0.047	0.121	1	8
Rmi2	0.0363206	-2.21347	0	0.02	1	8
Eomes	0.013407	-2.21281	0.023	0.073	1	8
Gm14295	0.515603	-2.212	0.009	0.016	1	8
Lrrc4c	0.764055	-2.20948	0.009	0.012	1	8
D430019H16Rik	0.105887	-2.20866	0	0.012	1	8
Polrmt	0.00345847	-2.20586	0.009	0.061	1	8
Hyls1	0.583632	-2.20579	0.019	0.012	1	8
Sorcs2	0.0317302	-2.19899	0.005	0.032	1	8
Eif5a2	0.386293	-2.19873	0.005	0.012	1	8
Setmar	0.330051	-2.19858	0.009	0.02	1	8
Lta	0.0363206	-2.19014	0	0.02	1	8
Pomc	0.593321	-2.19008	0.023	0.016	1	8
Klrb1	0.0615039	-2.18956	0	0.016	1	8
Sdr39u1	0.0116133	-2.18438	0.005	0.04	1	8
Prc1	0.279805	-2.18087	0.023	0.04	1	8
Itih5	0.139302	-2.17817	0.005	0.02	1	8
Spaca7b	0.105887	-2.17584	0	0.012	1	8
Slc7a10	0.217911	-2.17267	0.009	0.024	1	8
Cep131	0.0927837	-2.17124	0.009	0.032	1	8
Ntng1	0.139302	-2.16677	0.005	0.02	1	8
Col6a6	0.386293	-2.16506	0.005	0.012	1	8
4930503L19Rik	0.10014	-2.16126	0.023	0.053	1	8
Mto1	0.0123022	-2.14919	0.06	0.13	1	8
Catsper2	0.143737	-2.14465	0.009	0.028	1	8
Homez	0.336651	-2.13829	0.009	0.02	1	8
Tmtc1	0.0615039	-2.13355	0	0.016	1	8
Lgr4	0.212192	-2.12902	0.009	0.024	1	8
Trmo	0.116453	-2.12766	0.037	0.069	1	8
Rhox8	0.506442	-2.12407	0.009	0.016	1	8
Cela1	0.599156	-2.12123	0.014	0.02	1	8
Adamts14	0.0153467	-2.11653	0.019	0.065	1	8
Ifi44	0.0518024	-2.11225	0.005	0.028	1	8
Lpar2	0.0615039	-2.10251	0	0.016	1	8
Ap1m2	0.0615039	-2.09987	0	0.016	1	8
Zfp446	0.142183	-2.09751	0.005	0.02	1	8
Pigz	0.126915	-2.09442	0.014	0.036	1	8
Cstf1	0.202869	-2.09106	0.042	0.069	1	8
Palld	0.854041	-2.08984	0.019	0.016	1	8
C1qtnf9	0.105887	-2.08722	0	0.012	1	8
Nptx2	0.383911	-2.08667	0.005	0.012	1	8
Cd209d	0.670531	-2.08525	0.019	0.024	1	8
Afmid	0.0363206	-2.0852	0	0.02	1	8
Galnt4	0.16621	-2.08241	0.019	0.04	1	8
Lrfn2	0.383911	-2.08154	0.005	0.012	1	8
Cacna1f	0.335935	-2.07881	0.019	0.032	1	8
Rgs7bp	0.105887	-2.07517	0	0.012	1	8
Agap2	0.0129009	-2.0742	0.028	0.081	1	8
Fsd1l	0.383911	-2.07314	0.005	0.012	1	8
Pja1	0.0361414	-2.06899	0.019	0.057	1	8
Serp2	0.234462	-2.06882	0.005	0.016	1	8
Clec2e	0.105887	-2.0686	0	0.012	1	8
Xrcc3	0.105887	-2.06798	0	0.012	1	8
Ajm1	0.105887	-2.05931	0	0.012	1	8
Grhl1	0.0216039	-2.05087	0.009	0.045	1	8
Yars2	0.0319252	-2.04997	0.019	0.057	1	8
Sh3d21	0.105887	-2.04725	0	0.012	1	8
Fpgt	0.104963	-2.04691	0.023	0.053	1	8
Rasgef1a	0.105887	-2.03661	0	0.012	1	8
Ccdc141	0.229892	-2.03443	0.005	0.016	1	8
Gstm4	0.125658	-2.02803	0.014	0.036	1	8
Mypop	0.761084	-2.0271	0.009	0.012	1	8
Fcmr	0.383911	-2.02611	0.005	0.012	1	8
Klhdc1	0.0458113	-2.02355	0.023	0.061	1	8
Frg2f1	0.378185	-2.02087	0.033	0.049	1	8
Cptp	0.0121482	-2.0205	0.005	0.04	1	8
Apol7c	0.333341	-2.01931	0.009	0.02	1	8
Samd4	0.386293	-2.01736	0.005	0.012	1	8
Usp35	0.932048	-2.01726	0.051	0.049	1	8
Tex15	0.0615039	-2.01635	0	0.016	1	8
Matn2	0.105887	-2.01425	0	0.012	1	8
Mid2	0.386293	-2.01362	0.005	0.012	1	8
Zfp846	0.289737	-2.00899	0.014	0.028	1	8
Smyd2	0.329768	-2.00396	0.028	0.045	1	8
Bend4	0.637584	-2.00142	0.047	0.036	1	8
Mpped2	0.383911	-2.00135	0.005	0.012	1	8
Dalrd3	0.0145873	-1.9999	0.056	0.121	1	8
Cryz	0.386293	-1.99915	0.005	0.012	1	8
Scrn3	0.136677	-1.99811	0.009	0.028	1	8
Txnrd2	0.0567561	-1.99643	0.07	0.121	1	8
Stfa2l1	0.76703	-1.99453	0.009	0.012	1	8
Ephx1	0.591291	-1.98742	0.028	0.036	1	8
Klra9	0.0321969	-1.98734	0.005	0.032	1	8
Slc25a35	0.484941	-1.9871	0.019	0.028	1	8
Qtrt2	0.0846781	-1.97921	0.014	0.04	1	8
Trmu	0.0637172	-1.97682	0.037	0.077	1	8
Inppl1	0.00822194	-1.96995	0.051	0.121	1	8
Agbl1	0.550894	-1.96979	0.014	0.008	1	8
Palb2	0.333341	-1.96973	0.009	0.02	1	8
Gm14305	0.0560969	-1.96783	0.014	0.045	1	8
Pfkm	0.76703	-1.96659	0.009	0.012	1	8
Pou2f3	0.105887	-1.96018	0	0.012	1	8
Ube2c	0.770009	-1.95917	0.009	0.012	1	8
Trpc1	0.511012	-1.95756	0.009	0.016	1	8
Bub1b	0.206331	-1.95366	0.023	0.045	1	8
Hepacam2	0.383911	-1.94691	0.005	0.012	1	8
Cacnb1	0.94306	-1.9411	0.023	0.024	1	8
Ccdc163	0.456673	-1.93434	0.028	0.04	1	8
Intu	0.105887	-1.93416	0	0.012	1	8
Mvk	0.0824418	-1.93077	0.033	0.069	1	8
Bik	0.570105	-1.92375	0.019	0.012	1	8
Adamtsl4	0.373223	-1.92014	0.023	0.012	1	8
Mak	0.553501	-1.91915	0.014	0.008	1	8
Adm	0.221396	-1.9189	0.009	0.024	1	8
Zfp335	0.105213	-1.91401	0.033	0.065	1	8
Upf1	0.000939824	-1.9139	0.093	0.198	1	8
F3	0.105887	-1.91355	0	0.012	1	8
Tubd1	0.346222	-1.91037	0.019	0.032	1	8
Iba57	0.0561387	-1.91006	0.009	0.036	1	8
Zbtb26	0.0351254	-1.90842	0.014	0.049	1	8
Adam23	0.206331	-1.90449	0.023	0.045	1	8
Slc25a1	0.0877061	-1.90427	0.07	0.113	1	8
Gm2296	0.105887	-1.90135	0	0.012	1	8
Scn3b	0.105887	-1.90008	0	0.012	1	8
Nme7	0.106011	-1.89924	0.033	0.065	1	8
Art2b	0.420576	-1.8988	0.014	0.024	1	8
Ipo13	0.244723	-1.89566	0.019	0.036	1	8
Fhl2	0.0518024	-1.89447	0.005	0.028	1	8
Sspo	0.0199105	-1.8944	0.005	0.036	1	8
Dnajb5	0.597009	-1.88719	0.014	0.02	1	8
Gzmm	0.0363206	-1.88497	0	0.02	1	8
Agtrap	0.00733326	-1.88213	0.07	0.146	1	8
Rtn2	0.0615039	-1.88082	0	0.016	1	8
Ube2ql1	0.383911	-1.87689	0.005	0.012	1	8
Med22	0.0733067	-1.87152	0.023	0.057	1	8
Commd5	0.138351	-1.86291	0.005	0.02	1	8
Bard1	0.140257	-1.86252	0.005	0.02	1	8
Sh3tc1	0.210157	-1.85989	0.084	0.117	1	8
Lrp11	0.105887	-1.85189	0	0.012	1	8
Tcte1	0.0615039	-1.85002	0	0.016	1	8
P2ry2	0.0321969	-1.84913	0.005	0.032	1	8
Dlg2	0.515603	-1.84881	0.009	0.016	1	8
Slc25a27	0.00900086	-1.84879	0.009	0.053	1	8
Cacna1s	0.138351	-1.84685	0.005	0.02	1	8
Zc3h12c	0.0186346	-1.84376	0.102	0.174	1	8
Serpina3g	0.00228844	-1.84283	0.084	0.178	1	8
Efcab8	0.105887	-1.84261	0	0.012	1	8
Arhgap19	0.846174	-1.84234	0.023	0.02	1	8
Tef	0.232575	-1.84217	0.037	0.061	1	8
Cwf19l1	0.248702	-1.84167	0.019	0.036	1	8
Gdf15	0.192176	-1.8409	0.014	0.032	1	8
Cibar1	0.439518	-1.83865	0.028	0.04	1	8
Ro60	0.451355	-1.8358	0.028	0.04	1	8
Nelfcd	0.0290606	-1.83395	0.07	0.13	1	8
Ss18l1	0.110077	-1.83364	0.033	0.065	1	8
As3mt	0.399946	-1.83261	0.088	0.109	1	8
Ccdc112	0.0801151	-1.82967	0.019	0.049	1	8
Rgs9	0.76703	-1.82777	0.009	0.012	1	8
Sh2d1a	0.014933	-1.82776	0.019	0.065	1	8
Zfp827	0.163349	-1.8273	0.019	0.04	1	8
Gtf2ird1	0.0853959	-1.82639	0.005	0.024	1	8
Abcc3	0.761084	-1.82513	0.009	0.012	1	8
Cdc7	0.0615039	-1.8222	0	0.016	1	8
Gm28051	0.517907	-1.82132	0.009	0.016	1	8
Ghdc	0.0540108	-1.81572	0.014	0.045	1	8
Ebf1	0.141353	-1.81539	0.009	0.028	1	8
Srd5a1	0.0615039	-1.8105	0	0.016	1	8
H1f5	0.764781	-1.8069	0.107	0.113	1	8
Mreg	0.0286153	-1.805	0.042	0.093	1	8
Ube2t	0.251716	-1.80496	0.019	0.036	1	8
Nat2	0.0610201	-1.80443	0.028	0.065	1	8
Fabp1	0.128182	-1.80311	0.014	0.036	1	8
Tspan2	0.030758	-1.80288	0.023	0.065	1	8
Gemin8	0.234462	-1.80067	0.005	0.016	1	8
Dnajc16	0.28421	-1.79349	0.042	0.065	1	8
Fgfrl1	0.105887	-1.79266	0	0.012	1	8
Zdhhc4	0.0241236	-1.78888	0.056	0.113	1	8
Gstt3	0.334993	-1.78639	0.009	0.02	1	8
Prdm8	0.105887	-1.78638	0	0.012	1	8
Oas1b	0.0233238	-1.78482	0.019	0.061	1	8
Vegfb	0.897832	-1.7838	0.019	0.02	1	8
Csprs	0.105887	-1.7831	0	0.012	1	8
Rnf180	0.972661	-1.78112	0.037	0.036	1	8
Zbtb7c	0.383911	-1.78051	0.005	0.012	1	8
Syde2	0.105887	-1.78041	0	0.012	1	8
Kcnh6	0.861427	-1.7776	0.014	0.012	1	8
Eya1	0.0548967	-1.76955	0.014	0.045	1	8
Hbegf	0.491581	-1.76864	0.019	0.028	1	8
Lmo7	0.388684	-1.76853	0.005	0.012	1	8
Zfp444	0.161613	-1.76621	0.065	0.101	1	8
Zfp993	0.417217	-1.76135	0.014	0.024	1	8
Polm	0.13386	-1.75975	0.047	0.081	1	8
Mtbp	0.174976	-1.75882	0.028	0.053	1	8
Sugct	0.489917	-1.75873	0.019	0.028	1	8
Fbxl19	0.0554941	-1.75699	0.014	0.045	1	8
Tubb4b	0.0588075	-1.75301	0.135	0.198	1	8
Aars2	0.214467	-1.75163	0.009	0.024	1	8
Cdnf	0.336651	-1.74886	0.009	0.02	1	8
Tubg1	0.0537181	-1.7482	0.014	0.045	1	8
Myo5b	0.0582137	-1.74408	0.009	0.036	1	8
Osgin1	0.0416336	-1.74285	0.028	0.069	1	8
2700097O09Rik	0.032444	-1.74251	0.023	0.065	1	8
Gbp5	0.103848	-1.74227	0.084	0.13	1	8
Lrrc8a	0.0327589	-1.74136	0.023	0.065	1	8
B3gnt5	0.359889	-1.74089	0.042	0.061	1	8
Arl9	0.105887	-1.73822	0	0.012	1	8
Ffar2	0.402304	-1.73594	0.023	0.036	1	8
Epb41l3	0.0701065	-1.73267	0.023	0.057	1	8
Sars2	0.332966	-1.72578	0.028	0.045	1	8
Lig1	0.0851192	-1.72445	0.014	0.04	1	8
Gm50139	0.105887	-1.72292	0	0.012	1	8
Tcf7l1	0.863754	-1.72135	0.019	0.016	1	8
Slc2a8	0.496593	-1.72033	0.019	0.028	1	8
Bcl7a	0.140257	-1.72014	0.005	0.02	1	8
Tsacc	0.417217	-1.7192	0.014	0.024	1	8
Crybb1	0.0853959	-1.71769	0.005	0.024	1	8
Lrrc73	0.105887	-1.71432	0	0.012	1	8
Ulk4	0.832645	-1.71291	0.014	0.016	1	8
Tmem138	0.550185	-1.7121	0.023	0.032	1	8
Cox15	0.0644956	-1.71146	0.028	0.065	1	8
Carnmt1	0.0295761	-1.71049	0.093	0.158	1	8
Gtf3c5	0.446072	-1.70462	0.028	0.04	1	8
Cdcp1	0.234462	-1.70211	0.005	0.016	1	8
Mnd1	0.105887	-1.70095	0	0.012	1	8
Vat1	0.215934	-1.69822	0.047	0.073	1	8
Adgrg3	0.583632	-1.69809	0.019	0.012	1	8
Kyat3	0.0615039	-1.69301	0	0.016	1	8
Fbxl13	0.388684	-1.69288	0.005	0.012	1	8
Herc6	0.00832928	-1.69269	0.14	0.231	1	8
Acta2	0.577224	-1.69211	0.028	0.036	1	8
Ifi205	0.00148609	-1.69048	0.116	0.227	1	8
Dlc1	0.772991	-1.68982	0.009	0.012	1	8
9930104L06Rik	0.718815	-1.68981	0.023	0.028	1	8
Gas8	0.336651	-1.68811	0.009	0.02	1	8
Ada	0.0859976	-1.68809	0.005	0.024	1	8
Flywch1	0.489034	-1.6869	0.033	0.045	1	8
Fer	0.0890758	-1.68461	0.009	0.032	1	8
Zbtb12	0.221396	-1.68396	0.009	0.024	1	8
Phc1	0.0874173	-1.68318	0.028	0.061	1	8
Myh10	0.515603	-1.68231	0.009	0.016	1	8
Ceacam16	0.0890758	-1.67771	0.009	0.032	1	8
Slc4a4	0.388684	-1.67647	0.005	0.012	1	8
Scin	0.388684	-1.67628	0.005	0.012	1	8
Pank1	0.198565	-1.67169	0.014	0.032	1	8
Pms1	0.114849	-1.66991	0.019	0.045	1	8
Fgd5	0.142144	-1.66974	0.009	0.028	1	8
Smg9	0.151175	-1.66958	0.088	0.126	1	8
Tamalin	0.000902848	-1.66853	0.06	0.158	1	8
Zfp692	0.733049	-1.66617	0.047	0.053	1	8
Ankrd6	0.585901	-1.66533	0.019	0.012	1	8
Pigw	0.288476	-1.66361	0.014	0.028	1	8
Gapdhs	0.105887	-1.66252	0	0.012	1	8
Sppl2b	0.691508	-1.65632	0.042	0.049	1	8
Zdhhc8	0.0561387	-1.65369	0.009	0.036	1	8
Cx3cl1	0.383911	-1.65358	0.005	0.012	1	8
Mansc1	0.603461	-1.65322	0.014	0.02	1	8
Vwa3b	0.105887	-1.65304	0	0.012	1	8
Gga2	0.293176	-1.65155	0.023	0.04	1	8
Alkbh2	0.296424	-1.64913	0.033	0.053	1	8
Nab2	0.34239	-1.64877	0.037	0.057	1	8
Ftl1-ps1	0.0723373	-1.64629	0.07	0.117	1	8
Adamtsl1	0.0615039	-1.64477	0	0.016	1	8
Bco1	0.515603	-1.6406	0.009	0.016	1	8
Cenpp	0.238839	-1.64033	0.019	0.036	1	8
Acad12	0.423951	-1.63998	0.014	0.024	1	8
Slc24a3	0.141353	-1.63741	0.009	0.028	1	8
Ifit3	0.0244742	-1.63737	0.074	0.138	1	8
Phlda3	0.513305	-1.63719	0.009	0.016	1	8
Ttc8	0.0615039	-1.6354	0	0.016	1	8
Nrn1	0.553501	-1.63406	0.014	0.008	1	8
Lcmt2	0.238839	-1.63382	0.019	0.036	1	8
Mrpl39	0.0188574	-1.63283	0.065	0.13	1	8
Mcm6	0.153663	-1.62882	0.056	0.089	1	8
Spib	0.0808791	-1.62867	0.019	0.049	1	8
Xrcc5	0.136677	-1.62673	0.009	0.028	1	8
Pmepa1	0.687653	-1.62671	0.037	0.045	1	8
Galnt3	0.110905	-1.62147	0.033	0.065	1	8
Tbccd1	0.217635	-1.62105	0.023	0.045	1	8
Phkg1	0.602271	-1.62094	0.028	0.02	1	8
Zfp61	0.232657	-1.62046	0.028	0.012	1	8
H2bc6	0.17457	-1.61943	0.088	0.126	1	8
Kbtbd8	0.341656	-1.61929	0.009	0.02	1	8
Cfap410	0.0701109	-1.61621	0.037	0.077	1	8
Ckm	0.105887	-1.61371	0	0.012	1	8
Fn3krp	0.383911	-1.6103	0.005	0.012	1	8
Fam20a	0.229892	-1.60183	0.005	0.016	1	8
Apbb1	0.105887	-1.60143	0	0.012	1	8
Cdca2	0.105887	-1.60022	0	0.012	1	8
Pwp2	0.297375	-1.59746	0.023	0.04	1	8
Trim13	0.506442	-1.59191	0.009	0.016	1	8
Limk1	0.0759244	-1.59076	0.033	0.069	1	8
Prdm15	0.280818	-1.59021	0.023	0.04	1	8
Zfp64	0.0823396	-1.58956	0.06	0.105	1	8
H2bc8	0.26115	-1.58859	0.051	0.077	1	8
2010315B03Rik	0.307184	-1.58694	0.144	0.17	1	8
Otud3	0.545313	-1.58526	0.023	0.032	1	8
Alad	0.415499	-1.58195	0.047	0.065	1	8
Ykt6	0.137879	-1.58096	0.102	0.146	1	8
Klf5	0.105887	-1.57885	0	0.012	1	8
Lipo3	0.844274	-1.57579	0.074	0.077	1	8
Isg20	0.00220437	-1.57478	0.06	0.15	1	8
Armcx6	0.232931	-1.57442	0.005	0.016	1	8
Cym	0.105887	-1.57394	0	0.012	1	8
Lrrc49	0.76703	-1.57178	0.009	0.012	1	8
Ccser1	0.170572	-1.57076	0.019	0.04	1	8
Gm20422	0.858895	-1.56824	0.019	0.016	1	8
Engase	0.343914	-1.56766	0.042	0.061	1	8
Creb3l1	0.101253	-1.56759	0.042	0.016	1	8
Coq4	0.254755	-1.56648	0.019	0.036	1	8
Fbxo36	0.234462	-1.5663	0.005	0.016	1	8
Zfp955a	0.139302	-1.56623	0.005	0.02	1	8
Abhd11	0.0131027	-1.56253	0.065	0.134	1	8
Gmppb	0.0892067	-1.56218	0.06	0.105	1	8
Nkg7	0.240703	-1.562	0.116	0.146	1	8
Rufy4	0.858895	-1.56159	0.019	0.016	1	8
Hgf	0.0292281	-1.56152	0.051	0.105	1	8
Pde6a	0.513305	-1.56136	0.009	0.016	1	8
Slc37a1	0.0361775	-1.55967	0.047	0.097	1	8
Cdon	0.198021	-1.55956	0.033	0.057	1	8
Gm28053	0.0853959	-1.55946	0.005	0.024	1	8
Rnf40	0.691362	-1.55834	0.079	0.089	1	8
Copz2	0.383911	-1.55798	0.005	0.012	1	8
Cntrob	0.766009	-1.55593	0.028	0.032	1	8
Gtf2h2	0.298278	-1.55423	0.06	0.085	1	8
Zbtb39	0.188249	-1.55329	0.028	0.053	1	8
Enho	0.388684	-1.55136	0.005	0.012	1	8
Jagn1	0.00415126	-1.54656	0.107	0.198	1	8
Serpine2	0.234462	-1.54191	0.005	0.016	1	8
Gpatch4	0.0239497	-1.54162	0.019	0.061	1	8
Gm5141	0.383911	-1.53902	0.005	0.012	1	8
Cars	0.581682	-1.53173	0.042	0.053	1	8
Ttll11	0.105887	-1.53169	0	0.012	1	8
Aars	0.0978461	-1.52982	0.06	0.101	1	8
Cmc4	0.401953	-1.52946	0.037	0.053	1	8
Gpaa1	0.696214	-1.52712	0.07	0.077	1	8
Ddx43	0.511012	-1.52591	0.009	0.016	1	8
Extl2	0.0244774	-1.52434	0.014	0.053	1	8
Heatr5b	0.859689	-1.52339	0.084	0.085	1	8
Dclk1	0.605618	-1.52321	0.014	0.02	1	8
Zfp563	0.423951	-1.52183	0.014	0.024	1	8
Egr3	0.336651	-1.52108	0.009	0.02	1	8
Gabbr2	0.550894	-1.5206	0.014	0.008	1	8
Papolg	0.082705	-1.51963	0.074	0.121	1	8
Hmgn3	0.178296	-1.51844	0.047	0.077	1	8
Cenpv	0.126285	-1.51348	0.014	0.036	1	8
Afp	0.0615039	-1.51266	0	0.016	1	8
Ap5s1	0.61668	-1.51234	0.037	0.028	1	8
Kif20b	0.330051	-1.51223	0.009	0.02	1	8
Pde10a	0.252726	-1.51042	0.019	0.036	1	8
Mrgpra2b	0.383911	-1.50797	0.005	0.012	1	8
Armcx5	0.0824418	-1.50656	0.033	0.069	1	8
Lax1	0.00396712	-1.50287	0.033	0.101	1	8
Spata48	0.253739	-1.50259	0.019	0.036	1	8
Dzip1	0.348824	-1.50198	0.019	0.032	1	8
Mx1	0.0323833	-1.50112	0.13	0.206	1	8
Baiap3	0.229892	-1.50082	0.005	0.016	1	8
Ddx51	0.146472	-1.49966	0.033	0.061	1	8
Slc16a2	0.193986	-1.49855	0.014	0.032	1	8
9430015G10Rik	0.354066	-1.49817	0.019	0.032	1	8
Cav2	0.356706	-1.497	0.019	0.032	1	8
Rnaset2a	0.000878245	-1.49401	0.107	0.219	1	8
Smad5	0.382599	-1.49186	0.084	0.105	1	8
Klrb1c	0.0125033	-1.48565	0.033	0.089	1	8
Pxylp1	0.351439	-1.48531	0.019	0.032	1	8
Mmp12	0.18993	-1.48519	0.023	0.008	1	8
Icosl	0.0775975	-1.48465	0.06	0.105	1	8
Cdkn2c	0.0154306	-1.48405	0.019	0.065	1	8
Col8a2	0.105887	-1.48315	0	0.012	1	8
Dnaaf5	0.634423	-1.48189	0.033	0.04	1	8
Mcam	0.22023	-1.48147	0.009	0.024	1	8
Tmem81	0.383911	-1.48128	0.005	0.012	1	8
Clip2	0.0457039	-1.48009	0.047	0.093	1	8
Ap1g2	0.606097	-1.47978	0.093	0.105	1	8
Map3k10	0.547143	-1.47479	0.042	0.053	1	8
Gen1	0.840382	-1.47428	0.014	0.016	1	8
Clcf1	0.0238233	-1.47361	0.019	0.061	1	8
Klhl17	0.869833	-1.47359	0.014	0.012	1	8
Clybl	0.0691794	-1.47355	0.093	0.15	1	8
Adcy6	0.141353	-1.47086	0.009	0.028	1	8
Ccdc17	0.858895	-1.47077	0.019	0.016	1	8
4921507P07Rik	0.0853959	-1.47068	0.005	0.024	1	8
Bco2	0.321135	-1.46903	0.019	0.008	1	8
Apeh	0.126071	-1.46528	0.07	0.109	1	8
P3h1	0.94306	-1.46172	0.023	0.024	1	8
Ikbke	0.279861	-1.45879	0.112	0.142	1	8
Uox	0.255839	-1.45849	0.014	0.004	1	8
Cd200	0.0505556	-1.45748	0.056	0.105	1	8
Ift22	0.0433879	-1.45487	0.042	0.089	1	8
Pcgf3	0.0148454	-1.4538	0.033	0.089	1	8
Igf2r	0.0270552	-1.4512	0.065	0.126	1	8
C030006K11Rik	0.148231	-1.45091	0.023	0.049	1	8
Eif3j2	0.234462	-1.45043	0.005	0.016	1	8
Cacna1e	0.0525515	-1.45008	0.005	0.028	1	8
Ifit3b	0.163254	-1.44972	0.047	0.077	1	8
Dvl3	0.347824	-1.44946	0.06	0.081	1	8
Rhebl1	0.192176	-1.44462	0.014	0.032	1	8
Il18rap	0.01559	-1.44396	0.065	0.134	1	8
Camk2a	0.953044	-1.4418	0.042	0.04	1	8
Gkap1	0.40358	-1.44117	0.047	0.065	1	8
Grhpr	0.0564003	-1.44091	0.014	0.045	1	8
Mtmr10	0.146919	-1.43905	0.084	0.121	1	8
Cdkl3	0.133916	-1.43884	0.028	0.057	1	8
Ube2cbp	0.216759	-1.43752	0.009	0.024	1	8
Ankrd27	0.159532	-1.43704	0.056	0.089	1	8
Oas1g	0.310741	-1.4354	0.051	0.073	1	8
Tada1	0.33316	-1.43521	0.112	0.081	1	8
Eogt	0.0859976	-1.43485	0.005	0.024	1	8
Cyren	0.866978	-1.43302	0.079	0.073	1	8
Tsc2	0.0342538	-1.43269	0.037	0.085	1	8
Nfrkb	0.299153	-1.43244	0.107	0.138	1	8
Morn2	0.251716	-1.43169	0.019	0.036	1	8
Zfp119a	0.251311	-1.4314	0.028	0.049	1	8
Taf8	0.0396397	-1.42975	0.056	0.109	1	8
Pank4	0.436722	-1.42873	0.056	0.073	1	8
Dhcr7	0.203181	-1.42838	0.023	0.045	1	8
Prmt2	0.386293	-1.42836	0.005	0.012	1	8
Cfap298	0.663698	-1.42653	0.033	0.04	1	8
Tmx1	0.223924	-1.42566	0.14	0.178	1	8
Upp2	0.339424	-1.42364	0.028	0.045	1	8
Epcam	0.0615039	-1.42266	0	0.016	1	8
Rpp30	0.00204757	-1.41991	0.06	0.15	1	8
Glcci1	0.849193	-1.41583	0.019	0.016	1	8
Pex6	0.156679	-1.41382	0.074	0.113	1	8
Cyb561d1	0.608694	-1.41365	0.028	0.036	1	8
Aasdh	0.183296	-1.41169	0.037	0.065	1	8
Orc1	0.761084	-1.40942	0.009	0.012	1	8
Mettl21a	0.253037	-1.40931	0.028	0.049	1	8
Scarf1	0.989746	-1.40908	0.037	0.036	1	8
Gdpgp1	0.412962	-1.40856	0.023	0.036	1	8
Tomm40l	0.0804964	-1.40788	0.019	0.049	1	8
Icmt	0.353688	-1.40693	0.028	0.045	1	8
Gpr162	0.287219	-1.40623	0.014	0.028	1	8
Mbtps1	0.0277067	-1.40619	0.14	0.215	1	8
Ttn	0.00312302	-1.40554	0.033	0.101	1	8
Gm28539	0.386293	-1.40389	0.005	0.012	1	8
Flad1	0.54651	-1.40375	0.079	0.093	1	8
Kcnc1	0.234462	-1.4026	0.005	0.016	1	8
Rtl5	0.998291	-1.40205	0.037	0.036	1	8
Fbxl8	0.482346	-1.40204	0.042	0.057	1	8
Kdm4a	0.286253	-1.40121	0.107	0.138	1	8
Qprt	0.0895981	-1.39927	0.009	0.032	1	8
Zfp422	0.577315	-1.39831	0.07	0.081	1	8
Kif21a	0.219068	-1.3966	0.009	0.024	1	8
Nup58	0.597009	-1.39527	0.014	0.02	1	8
Ptgs1	0.599156	-1.3903	0.014	0.02	1	8
Zfp369	0.472007	-1.38952	0.042	0.057	1	8
Nek3	0.229892	-1.38921	0.005	0.016	1	8
Tmem144	0.863754	-1.38832	0.019	0.016	1	8
Thap4	0.251716	-1.38828	0.019	0.036	1	8
Rnf113a1	0.386293	-1.38611	0.005	0.012	1	8
Cdh2	0.0704213	-1.38527	0.023	0.057	1	8
Pygb	0.044872	-1.38474	0.079	0.138	1	8
Tgm3	0.481639	-1.38387	0.019	0.028	1	8
Alg3	0.479919	-1.38277	0.033	0.045	1	8
Tmem35b	0.504875	-1.38253	0.033	0.045	1	8
Cep162	0.709745	-1.38138	0.065	0.073	1	8
Fam110b	0.142183	-1.38072	0.005	0.02	1	8
Ptprv	0.840382	-1.37988	0.014	0.016	1	8
Irf7	0.000780364	-1.37948	0.288	0.425	1	8
Nmral1	0.197753	-1.37843	0.023	0.045	1	8
Tsga10	0.0466218	-1.37698	0.065	0.121	1	8
Eef2kmt	0.0316361	-1.3751	0.06	0.117	1	8
Polr2l	0.0435862	-1.37501	0.233	0.316	1	8
Stk32c	0.0326696	-1.37501	0.005	0.032	1	8
Il18	0.0012908	-1.37404	0.2	0.328	1	8
Ankrd26	0.80867	-1.37322	0.028	0.024	1	8
Slco5a1	0.0786046	-1.37112	0.019	0.049	1	8
Twnk	0.16838	-1.36969	0.019	0.04	1	8
Wrap73	0.373913	-1.36901	0.056	0.077	1	8
Rbak	0.76859	-1.36554	0.047	0.04	1	8
Pex26	0.58502	-1.36436	0.028	0.036	1	8
Cog6	0.867821	-1.36379	0.042	0.045	1	8
Pdcd1	0.0853959	-1.36162	0.005	0.024	1	8
Pax5	0.234462	-1.3595	0.005	0.016	1	8
Ctu1	0.837801	-1.35944	0.014	0.016	1	8
Commd1b	0.383911	-1.35841	0.005	0.012	1	8
Ddx28	0.330964	-1.35739	0.037	0.057	1	8
Pusl1	0.0872112	-1.35637	0.005	0.024	1	8
Tssc4	0.401568	-1.35556	0.084	0.105	1	8
Pdpr	0.00954393	-1.3554	0.056	0.126	1	8
Smpd4	0.295508	-1.3549	0.033	0.053	1	8
Pald1	0.289737	-1.35471	0.014	0.028	1	8
Def8	0.255642	-1.35272	0.028	0.049	1	8
Zkscan8	0.246181	-1.35199	0.028	0.049	1	8
Ppp3cc	0.0181058	-1.35139	0.079	0.146	1	8
Acvr2b	0.221396	-1.34838	0.009	0.024	1	8
Slc4a8	0.104518	-1.34808	0.023	0.053	1	8
Styk1	0.0901228	-1.34613	0.009	0.032	1	8
Srf	0.0618443	-1.34431	0.033	0.073	1	8
5730455P16Rik	0.235489	-1.3438	0.037	0.061	1	8
Trp53i11	0.0967644	-1.34361	0.047	0.085	1	8
Myo7a	0.611632	-1.34302	0.047	0.057	1	8
Chpf	0.141218	-1.33912	0.005	0.02	1	8
a	0.379285	-1.33701	0.033	0.049	1	8
Coasy	0.447256	-1.33665	0.042	0.057	1	8
Tmco6	0.059829	-1.33635	0.014	0.045	1	8
Il23a	0.386293	-1.3362	0.005	0.012	1	8
Aldoc	0.0866026	-1.33512	0.005	0.024	1	8
Lyrm2	0.160951	-1.33391	0.135	0.178	1	8
Serpinc1	0.761084	-1.33219	0.009	0.012	1	8
Cd300c	0.609943	-1.33084	0.014	0.02	1	8
Arhgef5	0.105887	-1.3304	0	0.012	1	8
Shld3	0.720712	-1.32814	0.023	0.028	1	8
Pop1	0.289737	-1.32781	0.014	0.028	1	8
Mrps34	0.00213348	-1.32688	0.195	0.308	1	8
Kctd1	0.688656	-1.3266	0.042	0.049	1	8
Gpr171	0.0070181	-1.3263	0.023	0.081	1	8
Smim24	0.0319765	-1.32625	0.023	0.065	1	8
Sytl3	0.0151047	-1.3259	0.051	0.113	1	8
Bnip1	0.0495521	-1.32577	0.037	0.081	1	8
Dnajc17	0.613371	-1.32508	0.098	0.109	1	8
Htra1	0.0786046	-1.32389	0.019	0.049	1	8
Impdh1	0.938285	-1.32296	0.047	0.045	1	8
Ankmy2	0.2593	-1.32241	0.065	0.093	1	8
Flt3l	0.772818	-1.32061	0.056	0.061	1	8
Ndrg1	0.364078	-1.32056	0.121	0.15	1	8
2810021J22Rik	0.0866026	-1.31605	0.005	0.024	1	8
Mterf1b	0.930435	-1.31571	0.023	0.024	1	8
Pip4k2b	0.00383651	-1.31472	0.07	0.158	1	8
H2-M2	0.172045	-1.31292	0.019	0.04	1	8
Kdr	0.605618	-1.31236	0.014	0.02	1	8
Tpcn1	0.43987	-1.31203	0.093	0.113	1	8
Tdp1	0.303494	-1.31178	0.037	0.057	1	8
Nbea	0.0795952	-1.30824	0.033	0.069	1	8
Arl6	0.872638	-1.30659	0.014	0.012	1	8
Dact3	0.515603	-1.30607	0.009	0.016	1	8
Mul1	0.528833	-1.30156	0.07	0.085	1	8
Slc39a13	0.247262	-1.30059	0.084	0.113	1	8
Bend3	0.484941	-1.3003	0.019	0.028	1	8
Cox18	0.580717	-1.29995	0.065	0.077	1	8
Ift74	0.336651	-1.29925	0.009	0.02	1	8
Mrps6	0.280383	-1.29897	0.098	0.13	1	8
Zfp933	0.253592	-1.29858	0.051	0.077	1	8
Camsap1	0.764669	-1.29763	0.051	0.057	1	8
Hap1	0.244723	-1.29726	0.019	0.036	1	8
Aqr	0.0210113	-1.29724	0.195	0.275	1	8
Tnfsf10	0.0895894	-1.29523	0.028	0.061	1	8
Nol8	0.10976	-1.29472	0.084	0.13	1	8
Cygb	0.336651	-1.29446	0.009	0.02	1	8
Cdk5	0.8572	-1.29382	0.07	0.073	1	8
Tnni1	0.383911	-1.29174	0.005	0.012	1	8
Il22ra2	0.182854	-1.29165	0.028	0.053	1	8
H4c11	0.0533096	-1.29028	0.005	0.028	1	8
Stoml1	0.143739	-1.28995	0.06	0.097	1	8
Csmd1	0.086902	-1.28884	0.014	0.04	1	8
Mus81	0.221445	-1.28807	0.042	0.069	1	8
Rrp9	0.130499	-1.28677	0.047	0.081	1	8
Klrk1	0.0100066	-1.28644	0.107	0.186	1	8
Trub1	0.248702	-1.28455	0.019	0.036	1	8
Pgm1	0.317129	-1.28422	0.051	0.073	1	8
Gm16253	0.383911	-1.28391	0.005	0.012	1	8
Rapgef5	0.284716	-1.28216	0.014	0.028	1	8
Sec23b	0.0225204	-1.28186	0.107	0.182	1	8
Armc9	0.345961	-1.28023	0.028	0.045	1	8
Lpar3	0.105887	-1.27998	0	0.012	1	8
Hilpda	0.202979	-1.27825	0.084	0.117	1	8
Serhl	0.278776	-1.27705	0.084	0.113	1	8
St18	0.840382	-1.27661	0.014	0.016	1	8
Zfp952	0.397698	-1.27371	0.047	0.065	1	8
Nicn1	0.76703	-1.26947	0.009	0.012	1	8
Ptcd3	0.302921	-1.26907	0.07	0.097	1	8
Wdr90	0.388684	-1.26874	0.005	0.012	1	8
Colq	0.835338	-1.26869	0.023	0.02	1	8
Cog4	0.0159583	-1.26842	0.14	0.223	1	8
Phf11c	0.371628	-1.26829	0.033	0.049	1	8
Hrh2	0.114265	-1.2682	0.033	0.065	1	8
Adgrg6	0.0592716	-1.2662	0.07	0.121	1	8
5730409E04Rik	0.57685	-1.26541	0.019	0.012	1	8
Zdbf2	0.288476	-1.26434	0.014	0.028	1	8
Abhd13	0.195845	-1.26287	0.051	0.081	1	8
Ppp1r3b	1	-1.26283	0.033	0.032	1	8
Tuft1	0.676601	-1.26026	0.019	0.024	1	8
Rnf213	8.78935e-05	-1.26017	0.442	0.595	1	8
Gm10130	0.313385	-1.26012	0.037	0.057	1	8
Ccl5	0.049026	-1.25869	0.27	0.328	1	8
Kars	0.179643	-1.25758	0.112	0.15	1	8
Npas3	0.326375	-1.25666	0.019	0.008	1	8
Rbm48	0.384584	-1.25656	0.07	0.093	1	8
Lsm11	0.197643	-1.25617	0.014	0.032	1	8
Src	0.674575	-1.25593	0.019	0.024	1	8
Fbxl9	0.120724	-1.25571	0.019	0.045	1	8
Zwilch	0.383911	-1.25569	0.005	0.012	1	8
Tmem254	0.241555	-1.25504	0.051	0.077	1	8
Fam53a	0.570363	-1.25452	0.112	0.13	1	8
Fam185a	0.0146553	-1.25247	0.009	0.049	1	8
Hebp1	0.346187	-1.25245	0.13	0.154	1	8
Poglut1	0.443745	-1.25218	0.07	0.089	1	8
Ube3b	0.425476	-1.24908	0.135	0.158	1	8
Rhbdd3	1	-1.24905	0.033	0.032	1	8
Ptdss2	0.874061	-1.24799	0.042	0.045	1	8
Lins1	0.614282	-1.24523	0.014	0.02	1	8
Gne	0.947857	-1.24138	0.051	0.053	1	8
Prkar1b	0.841836	-1.24105	0.023	0.02	1	8
H2ac25	0.0397074	-1.23761	0.144	0.215	1	8
Rtel1	0.890908	-1.23756	0.019	0.02	1	8
Aen	0.0595193	-1.2374	0.088	0.146	1	8
Zfp281	0.0697114	-1.23595	0.074	0.126	1	8
Ltbp2	0.140257	-1.23586	0.005	0.02	1	8
Styxl1	0.231408	-1.23566	0.005	0.016	1	8
Chtf8	0.142183	-1.23538	0.005	0.02	1	8
Noa1	0.0183608	-1.23502	0.033	0.085	1	8
Tex9	0.208717	-1.23479	0.023	0.045	1	8
Ticrr	0.0615039	-1.23398	0	0.016	1	8
Sass6	0.941371	-1.23339	0.093	0.089	1	8
Nek6	0.784863	-1.23308	0.042	0.036	1	8
Fam151b	0.119639	-1.23291	0.019	0.045	1	8
Wdr6	0.789457	-1.23262	0.028	0.032	1	8
Helz2	0.146024	-1.23234	0.116	0.162	1	8
Ifit1	0.0737795	-1.23211	0.047	0.089	1	8
Nmrk1	0.489333	-1.23142	0.047	0.061	1	8
BC049715	0.395629	-1.23109	0.028	0.016	1	8
Rab3ip	0.480846	-1.23088	0.07	0.085	1	8
Jakmip1	0.943519	-1.22879	0.051	0.053	1	8
Ralgps2	0.0381877	-1.22612	0.116	0.186	1	8
Crtac1	0.105887	-1.22597	0	0.012	1	8
H2-T24	0.37766	-1.22583	0.098	0.121	1	8
Lysmd2	0.210318	-1.22428	0.023	0.045	1	8
Sema4c	0.105887	-1.22232	0	0.012	1	8
Rbm8a2	0.383911	-1.22207	0.005	0.012	1	8
Cib2	0.245892	-1.22199	0.037	0.061	1	8
Tmem184c	0.831484	-1.22068	0.074	0.069	1	8
Grsf1	0.0251758	-1.21674	0.13	0.206	1	8
Rpgrip1	0.157102	-1.21519	0.07	0.105	1	8
Aimp2	0.255061	-1.21432	0.037	0.061	1	8
Reep4	0.174779	-1.21411	0.065	0.097	1	8
Rem1	0.867821	-1.21396	0.042	0.045	1	8
Dlat	0.758369	-1.21367	0.098	0.105	1	8
Atm	0.12238	-1.21365	0.084	0.13	1	8
Baiap2l1	0.0967555	-1.2128	0.028	0.061	1	8
Ifi206	0.0275324	-1.21247	0.167	0.247	1	8
Tdrkh	0.819492	-1.21228	0.033	0.028	1	8
Rcc1l	0.348824	-1.21109	0.019	0.032	1	8
Usp18	0.0629044	-1.21078	0.13	0.198	1	8
Agbl3	0.423951	-1.21066	0.014	0.024	1	8
Mctp2	0.183515	-1.20959	0.107	0.146	1	8
Tent4a	0.0204546	-1.20934	0.074	0.142	1	8
Senp1	0.168871	-1.20875	0.186	0.227	1	8
Ccdc189	0.231408	-1.2067	0.005	0.016	1	8
Cxcl10	0.177814	-1.20617	0.126	0.17	1	8
Abitram	0.0377044	-1.20564	0.033	0.077	1	8
Nudt15	0.452681	-1.20497	0.028	0.04	1	8
Sbk1	0.45534	-1.20479	0.028	0.04	1	8
Cfl2	0.132748	-1.20442	0.107	0.154	1	8
Pigo	0.608694	-1.20407	0.028	0.036	1	8
AI597479	0.131393	-1.20305	0.014	0.036	1	8
Gpatch2	0.916037	-1.20249	0.177	0.17	1	8
Dusp4	0.170572	-1.20244	0.019	0.04	1	8
Mzt2	0.615323	-1.20085	0.06	0.049	1	8
Or5v1b	0.187708	-1.20007	0.023	0.008	1	8
Ndor1.1	0.142183	-1.19714	0.005	0.02	1	8
Tprkb	0.575096	-1.19695	0.06	0.073	1	8
Bcl2l1	0.547463	-1.1968	0.079	0.093	1	8
Iigp1	0.824425	-1.19574	0.028	0.024	1	8
Efcab7	0.334993	-1.19532	0.009	0.02	1	8
Disp1	0.0876255	-1.19499	0.065	0.109	1	8
Haus1	0.672552	-1.19484	0.019	0.024	1	8
9830107B12Rik	0.232931	-1.19314	0.005	0.016	1	8
Chpf2	0.319759	-1.19212	0.047	0.069	1	8
Dyrk1b	0.231408	-1.18977	0.005	0.016	1	8
H2ac13	0.198565	-1.1878	0.014	0.032	1	8
Snx24	0.680589	-1.18735	0.088	0.097	1	8
mt-Nd6	0.997614	-1.18617	0.13	0.13	1	8
Wdhd1	0.186212	-1.18565	0.028	0.053	1	8
Pex19	0.113655	-1.18562	0.065	0.105	1	8
Smad6	0.374885	-1.18301	0.023	0.012	1	8
Mmaa	0.534514	-1.18264	0.037	0.049	1	8
Mvb12b	0.855566	-1.18237	0.07	0.065	1	8
Ip6k3	0.507966	-1.18232	0.074	0.089	1	8
Ptgr1	0.231128	-1.18154	0.037	0.061	1	8
Dpp10	0.0316164	-1.18105	0.051	0.105	1	8
Dclk2	0.511012	-1.18057	0.009	0.016	1	8
Pabpc1l	0.0726572	-1.17989	0.023	0.057	1	8
Mrps2	0.767389	-1.17884	0.051	0.057	1	8
Pole	0.845548	-1.1781	0.014	0.016	1	8
Nr2c1	0.0818022	-1.17784	0.033	0.069	1	8
Cand1	0.185528	-1.17783	0.149	0.194	1	8
Tbc1d4	0.104124	-1.17702	0.084	0.13	1	8
Rbm18	0.150027	-1.17494	0.098	0.142	1	8
Bpnt1	0.0573888	-1.17459	0.051	0.097	1	8
Phf11b	0.0122365	-1.17248	0.186	0.279	1	8
Dnase2a	0.53226	-1.17194	0.153	0.17	1	8
Tshz3	0.0701065	-1.17179	0.023	0.057	1	8
Zfp770	0.0449139	-1.17085	0.042	0.089	1	8
Alg11	0.147033	-1.17007	0.023	0.049	1	8
Fzd6	0.386293	-1.16974	0.005	0.012	1	8
Spint2	0.558366	-1.16958	0.107	0.089	1	8
Mycbpap	0.383911	-1.16935	0.005	0.012	1	8
Brd8dc	0.105887	-1.16877	0	0.012	1	8
Septin8	0.55727	-1.16786	0.042	0.053	1	8
Stard3nl	0.0687533	-1.16762	0.205	0.263	1	8
Gjb2	0.108586	-1.16748	0.023	0.053	1	8
Fam8a1	0.346852	-1.16617	0.056	0.077	1	8
Mars2	0.398719	-1.16476	0.028	0.016	1	8
Mthfd2l	0.416233	-1.16372	0.037	0.053	1	8
Ccr6	0.397172	-1.16315	0.028	0.016	1	8
Crtc2	0.244558	-1.16249	0.065	0.093	1	8
Mettl3	0.0190592	-1.16221	0.051	0.113	1	8
Met	0.268722	-1.16215	0.074	0.105	1	8
Bms1	0.179418	-1.16176	0.144	0.19	1	8
Kctd21	0.606028	-1.1603	0.047	0.036	1	8
Ephb2	0.232931	-1.15912	0.005	0.016	1	8
Socs7	0.217498	-1.15838	0.07	0.101	1	8
Apbb2	0.195808	-1.15743	0.014	0.032	1	8
Itgb3bp	0.608705	-1.157	0.042	0.032	1	8
Pdss1	0.0132558	-1.15633	0.037	0.097	1	8
Klf12	0.155283	-1.15588	0.042	0.073	1	8
Ccdc92	0.105887	-1.15546	0	0.012	1	8
Ociad2	0.105887	-1.15481	0	0.012	1	8
Wdr11	0.383941	-1.15348	0.126	0.097	1	8
Zfp810	0.120955	-1.15338	0.042	0.077	1	8
Lig3	0.512404	-1.15266	0.065	0.081	1	8
Fam20c	0.830262	-1.15235	0.06	0.065	1	8
Vcan	0.0692288	-1.15233	0.088	0.142	1	8
Prps2	0.245692	-1.15181	0.093	0.126	1	8
Pwp1	0.0538955	-1.15133	0.079	0.134	1	8
Isg15	0.00369154	-1.15048	0.219	0.332	1	8
Uba7	0.0172321	-1.1503	0.102	0.178	1	8
Dzip3	0.9583	-1.15018	0.107	0.105	1	8
Haus4	0.965427	-1.14939	0.065	0.065	1	8
Slc37a2	0.269463	-1.14823	0.065	0.093	1	8
Nphp3	0.607779	-1.1482	0.014	0.02	1	8
Sco1	0.256514	-1.14504	0.028	0.049	1	8
Rnf123	0.994687	-1.1445	0.102	0.101	1	8
Snx11	0.208644	-1.14432	0.065	0.097	1	8
Iqcb1	0.158405	-1.1443	0.033	0.061	1	8
Mgam2-ps	0.764055	-1.14417	0.009	0.012	1	8
BC024978	0.854041	-1.14408	0.019	0.016	1	8
Zcchc4	0.165097	-1.1434	0.056	0.089	1	8
Jmjd4	0.328134	-1.14322	0.019	0.008	1	8
Gvin1	0.469188	-1.14268	0.102	0.121	1	8
Hmbs	0.511186	-1.14186	0.084	0.101	1	8
Taco1	0.0166493	-1.14176	0.093	0.17	1	8
Msto1	0.245714	-1.14173	0.019	0.036	1	8
6030468B19Rik	0.185505	-1.14159	0.023	0.008	1	8
Scaf1	0.171516	-1.14111	0.163	0.211	1	8
Usp40	0.932619	-1.1398	0.093	0.093	1	8
Pgm2l1	0.212383	-1.13913	0.065	0.097	1	8
Rab39	0.913313	-1.13862	0.047	0.049	1	8
Soga1	0.126071	-1.13754	0.07	0.109	1	8
Slfn3	0.832487	-1.13734	0.037	0.04	1	8
Nlrx1	0.645501	-1.13627	0.065	0.077	1	8
Ppil2	0.00439782	-1.13609	0.209	0.32	1	8
Otud1	0.245323	-1.13565	0.042	0.065	1	8
Zbtb8a	0.728317	-1.1348	0.023	0.028	1	8
Wnt6	0.747047	-1.13403	0.047	0.053	1	8
Klhl22	0.214697	-1.134	0.033	0.057	1	8
Otud7b	0.478208	-1.13365	0.047	0.061	1	8
Oas3	0.230079	-1.13323	0.144	0.178	1	8
Retsat	0.615079	-1.13123	0.028	0.036	1	8
Umad1	0.191925	-1.13084	0.042	0.069	1	8
2610021A01Rik	0.961099	-1.12855	0.028	0.028	1	8
Eci1	0.142116	-1.12722	0.102	0.146	1	8
Xpo4	0.109038	-1.12709	0.107	0.158	1	8
Cactin	0.682494	-1.12685	0.098	0.085	1	8
Slc4a2	0.176172	-1.12676	0.056	0.089	1	8
4930469K13Rik	0.182622	-1.12663	0.047	0.077	1	8
Styx-ps	0.232931	-1.12591	0.005	0.016	1	8
Brd8	0.136088	-1.12565	0.181	0.235	1	8
Ercc6l	0.0560969	-1.12465	0.014	0.045	1	8
Tmsb15b1	0.383911	-1.12455	0.005	0.012	1	8
Cdk7	0.0958745	-1.12447	0.112	0.166	1	8
Lpcat1	0.659833	-1.12332	0.112	0.121	1	8
Nedd4	0.021686	-1.12306	0.056	0.117	1	8
Sh2d4a	0.119099	-1.12259	0.019	0.045	1	8
Cops7a	0.457901	-1.1224	0.112	0.134	1	8
Pycrl	0.0493644	-1.12064	0.065	0.117	1	8
Oprd1	0.76703	-1.11911	0.009	0.012	1	8
Timm21	0.0669998	-1.11616	0.065	0.113	1	8
Cd151	0.598251	-1.11594	0.042	0.032	1	8
Xab2	0.469935	-1.11586	0.126	0.146	1	8
Clk3	0.00813014	-1.11487	0.135	0.227	1	8
Fgl2	0.0160452	-1.11205	0.135	0.223	1	8
Zfpm1	0.634754	-1.11185	0.047	0.057	1	8
Zfp141	0.327211	-1.11184	0.037	0.057	1	8
Pex10	0.401824	-1.11062	0.028	0.016	1	8
Cpped1	0.245738	-1.108	0.088	0.121	1	8
Gimap1	0.00564957	-1.10786	0.07	0.154	1	8
Nr1h3	0.00751072	-1.10701	0.135	0.231	1	8
Panx1	0.304138	-1.10683	0.14	0.17	1	8
Uqcc4	0.0937937	-1.10513	0.149	0.202	1	8
B4galt3	0.171291	-1.10508	0.056	0.089	1	8
Tmem129	0.726413	-1.10377	0.023	0.028	1	8
Zfp119b	0.940954	-1.1027	0.023	0.024	1	8
Kat8	0.241562	-1.10173	0.065	0.093	1	8
Sf3a2	0.0204546	-1.10079	0.074	0.142	1	8
Pus1	0.149041	-1.10065	0.07	0.109	1	8
Siglec1	0.491581	-1.10065	0.019	0.028	1	8
Gaa	0.480987	-1.09997	0.06	0.077	1	8
Ckap4	0.16091	-1.099	0.056	0.089	1	8
Aig1	0.0515164	-1.09825	0.107	0.17	1	8
Arhgap23	0.0584349	-1.09782	0.042	0.085	1	8
Msantd3	0.438214	-1.09721	0.028	0.04	1	8
Ahcy	0.219068	-1.09602	0.009	0.024	1	8
Zfp719	0.692607	-1.09597	0.051	0.061	1	8
Hoxb4	0.964369	-1.09493	0.042	0.04	1	8
Racgap1	0.157305	-1.09444	0.051	0.085	1	8
Ddx60	0.00498852	-1.09425	0.088	0.178	1	8
Mef2b	0.528016	-1.09198	0.037	0.049	1	8
Lsr	0.29258	-1.09063	0.06	0.085	1	8
Mpi	0.0122394	-1.09017	0.005	0.04	1	8
Septin2	0.621962	-1.08784	0.056	0.045	1	8
Adgrl1	0.130746	-1.08782	0.014	0.036	1	8
Anks1b	0.383911	-1.08733	0.005	0.012	1	8
Cd5	0.548559	-1.08632	0.023	0.032	1	8
Tlr9	0.185505	-1.08556	0.023	0.008	1	8
Gfpt2	0.386293	-1.08474	0.005	0.012	1	8
Naxe	0.0263474	-1.08416	0.088	0.158	1	8
H4c9	0.0231574	-1.08409	0.121	0.198	1	8
Spata5l1	0.981203	-1.08281	0.037	0.036	1	8
Fpr1	0.221396	-1.08194	0.009	0.024	1	8
Pmm2	0.0171622	-1.08108	0.163	0.247	1	8
Parp2	0.452895	-1.07988	0.163	0.186	1	8
Prrg4	0.334993	-1.07866	0.009	0.02	1	8
Elp1	0.367177	-1.07713	0.116	0.142	1	8
Zmynd19	0.22023	-1.07672	0.009	0.024	1	8
Uck2	0.173288	-1.0762	0.135	0.178	1	8
Elac2	0.412911	-1.07554	0.037	0.053	1	8
Med12	0.472676	-1.07532	0.13	0.154	1	8
Zfp821	0.770484	-1.07384	0.042	0.036	1	8
Tmem18	0.47835	-1.07326	0.019	0.028	1	8
L1cam	0.552252	-1.07287	0.06	0.073	1	8
Eml3	0.311924	-1.07202	0.088	0.117	1	8
Il2rb	0.311375	-1.07145	0.121	0.146	1	8
Tbc1d32	0.0891362	-1.07007	0.042	0.081	1	8
Ttc5	0.373604	-1.07005	0.177	0.211	1	8
Ncoa5	0.212306	-1.06873	0.116	0.154	1	8
Mttp	0.711715	-1.06645	0.037	0.045	1	8
Ckap2l	0.849193	-1.06501	0.019	0.016	1	8
Sash1	0.819749	-1.06423	0.195	0.194	1	8
Myc	0.172744	-1.06416	0.056	0.089	1	8
Tbc1d7	0.09065	-1.06309	0.009	0.032	1	8
Slc36a3	0.391512	-1.06298	0.033	0.049	1	8
Pygo2	0.364863	-1.06293	0.07	0.093	1	8
Gpr157	0.133349	-1.06238	0.014	0.036	1	8
Inpp1	0.104937	-1.06191	0.074	0.117	1	8
Wdr82	0.25262	-1.06152	0.181	0.215	1	8
Focad	0.0914324	-1.06139	0.028	0.061	1	8
Trim59	0.0385147	-1.06096	0.07	0.126	1	8
Tmem159	0.61328	-1.0604	0.065	0.077	1	8
Trim30c	0.213982	-1.06027	0.033	0.057	1	8
Zfp948	0.420576	-1.05984	0.014	0.024	1	8
Fat1	0.386293	-1.0584	0.005	0.012	1	8
Gm5617	0.391905	-1.05829	0.195	0.227	1	8
Alms1	0.972764	-1.05733	0.028	0.028	1	8
Atr	0.24948	-1.0562	0.088	0.121	1	8
Rnaseh2a	0.964257	-1.05554	0.098	0.097	1	8
Gps2	0.102572	-1.05499	0.284	0.344	1	8
Arsi	0.686159	-1.05471	0.037	0.045	1	8
Arhgef26	0.515603	-1.05467	0.009	0.016	1	8
Lin37	0.651832	-1.05433	0.074	0.085	1	8
C2	0.837801	-1.05354	0.014	0.016	1	8
Slc18a1	0.835222	-1.05302	0.014	0.016	1	8
Tmub1	0.0971875	-1.05287	0.056	0.097	1	8
Fance	0.433834	-1.05214	0.056	0.073	1	8
Ecm1	0.337262	-1.0517	0.028	0.045	1	8
Coa4	0.304022	-1.05138	0.13	0.158	1	8
Armh3	0.0438876	-1.0507	0.195	0.267	1	8
Pgap6	0.393761	-1.04977	0.033	0.049	1	8
Prkd2	0.796362	-1.04899	0.079	0.085	1	8
Liph	0.842964	-1.04872	0.014	0.016	1	8
L3mbtl3	0.677422	-1.04834	0.2	0.182	1	8
Pou5f2	0.422261	-1.04832	0.014	0.024	1	8
Cbfa2t2	0.124037	-1.04702	0.14	0.19	1	8
Armcx1	0.832645	-1.04685	0.014	0.016	1	8
Txndc16	0.142262	-1.04653	0.112	0.158	1	8
Atp10a	0.293724	-1.04621	0.093	0.121	1	8
Galns	0.151336	-1.04474	0.051	0.085	1	8
Lrrc47	0.937013	-1.04452	0.107	0.109	1	8
Hsdl1	0.14909	-1.04422	0.079	0.117	1	8
Atp1b1	0.151918	-1.04261	0.074	0.113	1	8
Zfp934	0.231408	-1.04079	0.005	0.016	1	8
Psph	0.523927	-1.04073	0.07	0.085	1	8
0610030E20Rik	0.0644469	-1.04049	0.121	0.182	1	8
Blnk	0.527144	-1.04042	0.051	0.065	1	8
Nrxn1	0.0239497	-1.03994	0.019	0.061	1	8
Acod1	0.246854	-1.03883	0.051	0.077	1	8
Rnf215	0.804314	-1.03858	0.088	0.081	1	8
Mycl	0.418894	-1.0384	0.014	0.024	1	8
Scrib	0.0884335	-1.03779	0.051	0.093	1	8
Rapgef4	0.162217	-1.03725	0.065	0.036	1	8
Trmt61a	0.791277	-1.03713	0.033	0.036	1	8
Mtg2	0.389468	-1.03707	0.06	0.081	1	8
Ikbip	0.993164	-1.0361	0.037	0.036	1	8
Foxd2	0.22374	-1.0358	0.009	0.024	1	8
Tmem168	0.343188	-1.03551	0.167	0.194	1	8
Anapc7	0.207121	-1.03519	0.079	0.113	1	8
E4f1	0.125559	-1.03503	0.107	0.154	1	8
Mrpl27	0.203617	-1.03464	0.167	0.202	1	8
Sec23a	0.106455	-1.03342	0.06	0.101	1	8
Pcgf2	0.355385	-1.03304	0.019	0.032	1	8
Dph5	0.808674	-1.03243	0.121	0.126	1	8
Nr2f6	0.612066	-1.03224	0.093	0.077	1	8
Scg5	0.761084	-1.03223	0.009	0.012	1	8
Tmem216	0.197643	-1.03152	0.014	0.032	1	8
Tlr5	0.425644	-1.03137	0.014	0.024	1	8
Ring1	0.770755	-1.03038	0.088	0.093	1	8
Mpzl3	0.890869	-1.02852	0.056	0.053	1	8
Pawr	0.0866026	-1.02819	0.005	0.024	1	8
Cuedc1	0.10997	-1.02767	0.023	0.053	1	8
3110009E18Rik	0.949144	-1.02687	0.084	0.081	1	8
Ccdc184	0.840382	-1.02663	0.014	0.016	1	8
Zfp579	0.418894	-1.02656	0.014	0.024	1	8
Mblac1	0.515603	-1.02622	0.009	0.016	1	8
Gm10974	0.219068	-1.02542	0.009	0.024	1	8
Adgrl2	0.808537	-1.02511	0.033	0.028	1	8
Retn	0.383911	-1.02476	0.005	0.012	1	8
Cherp	0.120805	-1.02409	0.121	0.17	1	8
Gmcl1	0.393142	-1.02383	0.116	0.142	1	8
Snx14	0.954682	-1.02355	0.093	0.093	1	8
Nod1	0.0525811	-1.02303	0.326	0.397	1	8
Ap5z1	0.796362	-1.02159	0.079	0.085	1	8
Plod1	0.0530264	-1.01996	0.056	0.105	1	8
Kbtbd3	0.557474	-1.01947	0.056	0.069	1	8
Ssc4d	0.963043	-1.01869	0.028	0.028	1	8
Rpp38	0.464715	-1.0173	0.028	0.04	1	8
Znfx1	0.739188	-1.01541	0.177	0.186	1	8
Dcaf4	0.317034	-1.0152	0.037	0.057	1	8
Lzic	0.688558	-1.01514	0.084	0.093	1	8
Fosl1	0.148833	-1.01437	0.023	0.049	1	8
Gm3435	0.553445	-1.01368	0.023	0.032	1	8
Bicral	0.376911	-1.01189	0.144	0.17	1	8
Prickle1	0.888602	-1.01187	0.019	0.02	1	8
Tbp	0.182622	-1.01059	0.047	0.077	1	8
Xxylt1	0.851506	-1.00992	0.112	0.105	1	8
Fam133b	0.0829269	-1.00919	0.237	0.296	1	8
Zfp235	0.84435	-1.0089	0.019	0.016	1	8
Pierce2	0.875445	-1.00759	0.014	0.012	1	8
Akap17b	0.672552	-1.00743	0.019	0.024	1	8
Tstd2	0.0695665	-1.00738	0.06	0.109	1	8
Lrp12	0.30697	-1.00698	0.042	0.024	1	8
Mrs2	0.0952752	-1.00681	0.093	0.142	1	8
Tango6	0.0594496	-1.00677	0.056	0.105	1	8
Rap1gap	0.553501	-1.00653	0.014	0.008	1	8
Il12rb2	0.0215985	-1.00595	0.074	0.142	1	8
Klhl9	0.44571	-1.00592	0.116	0.138	1	8
Tusc3	0.114713	-1.00473	0.121	0.174	1	8
Traf7	0.00506833	-1.00298	0.107	0.202	1	8
Kcnrg	0.291001	-1.00206	0.014	0.028	1	8
Tuba1a	0.0378381	-1.00138	0.177	0.255	1	8
Fggy	0.134419	-1.00133	0.019	0.004	1	8
Eml2	0.151268	-1.00015	0.033	0.061	1	8
Tnk2	0.719221	-0.999949	0.065	0.073	1	8
Angel1	0.386293	-0.999349	0.005	0.012	1	8
Prpsap2	0.265638	-0.998061	0.116	0.15	1	8
Abcb8	0.45534	-0.997469	0.028	0.04	1	8
Homer3	0.133349	-0.99741	0.014	0.036	1	8
Stk35	0.390221	-0.997196	0.07	0.093	1	8
Cgas	0.277898	-0.996746	0.079	0.109	1	8
Car5b	0.0872112	-0.996185	0.005	0.024	1	8
Mbnl3	0.228879	-0.996142	0.056	0.085	1	8
Mcrs1	0.0302003	-0.996096	0.13	0.202	1	8
Hdac6	0.388684	-0.995989	0.005	0.012	1	8
Hoxa7	0.388684	-0.995714	0.005	0.012	1	8
Lmna	0.163522	-0.995274	0.107	0.15	1	8
Map3k9	0.600755	-0.995217	0.028	0.036	1	8
Kif3a	0.59492	-0.995035	0.028	0.02	1	8
Gins1	0.905566	-0.994435	0.051	0.049	1	8
Etaa1	0.401692	-0.993363	0.033	0.049	1	8
Paip2b	0.11839	-0.992824	0.051	0.089	1	8
Timeless	0.172784	-0.991982	0.019	0.04	1	8
Trit1	0.232738	-0.991897	0.098	0.134	1	8
Mx2	0.807419	-0.991241	0.088	0.093	1	8
Ndst2	0.590296	-0.99069	0.07	0.057	1	8
Zdhhc16	0.0921781	-0.99029	0.028	0.061	1	8
Arhgef28	0.496593	-0.990206	0.019	0.028	1	8
Odad1	0.334993	-0.989935	0.009	0.02	1	8
Gnptg	0.647337	-0.989226	0.084	0.093	1	8
Scimp	0.0177698	-0.988828	0.06	0.126	1	8
Parp14	0.0120041	-0.988657	0.409	0.51	1	8
Gon7	0.11975	-0.988315	0.088	0.134	1	8
A130010J15Rik	0.601307	-0.988021	0.014	0.02	1	8
Clasrp	0.465896	-0.986977	0.084	0.065	1	8
Hdac10	0.116959	-0.986511	0.019	0.045	1	8
Il15ra	0.0962583	-0.9854	0.07	0.113	1	8
Hadhb	0.421527	-0.984603	0.247	0.271	1	8
Rbm41	0.358368	-0.984427	0.102	0.13	1	8
Slc39a10	0.304384	-0.983253	0.121	0.15	1	8
Ppox	0.580385	-0.98277	0.042	0.053	1	8
Chmp6	0.198428	-0.981995	0.112	0.15	1	8
Upf3b	0.119973	-0.981919	0.153	0.211	1	8
Zmynd8	0.0762971	-0.981587	0.284	0.348	1	8
Tnfsf14	0.115545	-0.981322	0.033	0.065	1	8
Mccc2	0.845517	-0.981252	0.037	0.04	1	8
Tbc1d30	0.211928	-0.980094	0.023	0.045	1	8
Ppfibp2	0.404422	-0.980078	0.14	0.162	1	8
Cracr2a	0.118306	-0.979999	0.065	0.105	1	8
Tmf1	0.0608059	-0.979516	0.205	0.271	1	8
Yars	0.320766	-0.979381	0.116	0.15	1	8
Gpn1	0.265101	-0.979037	0.074	0.105	1	8
Rmdn2	0.344925	-0.978874	0.019	0.032	1	8
Tafazzin	0.080375	-0.977857	0.181	0.247	1	8
Orc6	0.136118	-0.977635	0.074	0.113	1	8
Ddx39b	0.00340263	-0.977252	0.358	0.474	1	8
Mre11a	0.20761	-0.976055	0.079	0.113	1	8
Ifi211	0.0143386	-0.975838	0.219	0.312	1	8
Tenm4	0.386293	-0.975612	0.005	0.012	1	8
Unc119b	0.428197	-0.975601	0.051	0.069	1	8
Ssr2	0.0016761	-0.975314	0.242	0.368	1	8
Spryd7	0.836746	-0.974958	0.06	0.065	1	8
Bag6	0.112985	-0.972851	0.181	0.243	1	8
Eif2d	0.905809	-0.971195	0.047	0.049	1	8
Zmym6	0.44677	-0.970677	0.051	0.036	1	8
Eef1ece2	0.383911	-0.970323	0.005	0.012	1	8
Lgals3bp	0.00540558	-0.968204	0.205	0.312	1	8
Smyd4	0.495602	-0.967557	0.033	0.045	1	8
Tradd	0.192753	-0.965717	0.13	0.174	1	8
Cnnm4	0.345759	-0.964942	0.088	0.113	1	8
Polg	0.288863	-0.964312	0.07	0.097	1	8
Cyp2r1	0.603461	-0.963996	0.014	0.02	1	8
Terf2	0.14874	-0.962638	0.112	0.158	1	8
Krr1	0.242657	-0.96164	0.13	0.166	1	8
Aarsd1	0.386293	-0.96158	0.005	0.012	1	8
Lmo1	0.196681	-0.961546	0.051	0.081	1	8
Hdhd5	0.591481	-0.959489	0.079	0.065	1	8
Pkd2	0.751243	-0.959427	0.056	0.049	1	8
Sfxn3	0.425248	-0.958868	0.13	0.154	1	8
Ifi213	0.00159533	-0.95849	0.191	0.324	1	8
Tfg	0.0405409	-0.957879	0.191	0.267	1	8
Rps27rt	0.0164877	-0.957238	0.223	0.32	1	8
Zbed3	0.293176	-0.956266	0.023	0.04	1	8
Dlg5	0.386293	-0.955005	0.005	0.012	1	8
Nosip	0.504105	-0.953745	0.167	0.19	1	8
Atp2b4	0.307853	-0.953612	0.074	0.101	1	8
Nrg1	0.357691	-0.953521	0.056	0.077	1	8
Thnsl1	0.346222	-0.952932	0.019	0.032	1	8
H2ac15	0.336651	-0.952773	0.009	0.02	1	8
Sugp2	0.977165	-0.952607	0.065	0.065	1	8
Znhit3	0.608892	-0.952005	0.079	0.065	1	8
Pml	0.0812674	-0.951333	0.112	0.17	1	8
Pon3	0.65904	-0.951132	0.033	0.04	1	8
Rbms3	0.134419	-0.950628	0.019	0.004	1	8
Phka1	0.302522	-0.950268	0.047	0.069	1	8
Lmbr1	0.878254	-0.948329	0.014	0.012	1	8
Snx17	0.0480626	-0.947177	0.223	0.296	1	8
Mfsd13a	0.926183	-0.946351	0.051	0.053	1	8
Mtus2	0.388684	-0.946026	0.005	0.012	1	8
Traf3ip3	0.34178	-0.945981	0.191	0.219	1	8
Zscan21	0.285562	-0.94529	0.033	0.053	1	8
Cysltr1	0.271446	-0.944726	0.07	0.097	1	8
Rbm45	0.400632	-0.944711	0.047	0.065	1	8
Frmd4a	0.0803959	-0.944345	0.112	0.166	1	8
Ttll1	0.24275	-0.944149	0.019	0.036	1	8
Samd13	0.845548	-0.943381	0.014	0.016	1	8
Lrrc42	0.658017	-0.942623	0.037	0.045	1	8
Pak3	0.832645	-0.942551	0.014	0.016	1	8
Rnf31	0.875194	-0.941845	0.093	0.097	1	8
Luzp1	0.233835	-0.941375	0.163	0.206	1	8
Arl6ip4	0.0446468	-0.94112	0.195	0.275	1	8
1810055G02Rik	0.58298	-0.93982	0.042	0.053	1	8
Uchl3	0.00100836	-0.939775	0.102	0.215	1	8
Crcp	0.261012	-0.939699	0.112	0.142	1	8
Gabpa	0.0129743	-0.939514	0.098	0.182	1	8
Apol7e	0.293176	-0.939229	0.023	0.04	1	8
Edem3	0.090389	-0.93913	0.102	0.158	1	8
Mri1	0.139732	-0.938953	0.112	0.158	1	8
Inpp5b	0.157404	-0.937739	0.088	0.13	1	8
Kif23	0.518035	-0.936152	0.088	0.105	1	8
Dis3	0.156736	-0.93551	0.033	0.061	1	8
Poglut2	0.897832	-0.935448	0.019	0.02	1	8
Sco2	0.630409	-0.934771	0.065	0.053	1	8
Kbtbd4	0.296322	-0.933898	0.023	0.04	1	8
Kif24	0.425644	-0.933405	0.014	0.024	1	8
Fam122b	0.842964	-0.933152	0.014	0.016	1	8
Jtb	0.0148361	-0.93222	0.288	0.368	1	8
Neil1	0.914858	-0.93204	0.056	0.053	1	8
Cdc23	0.623146	-0.932014	0.047	0.057	1	8
BC049762	0.386293	-0.931957	0.005	0.012	1	8
Rbm10	0.405237	-0.930937	0.088	0.109	1	8
Fam118b	0.67682	-0.930532	0.126	0.138	1	8
Atp6v0a2	0.556593	-0.929686	0.205	0.174	1	8
Cep112	0.545699	-0.928215	0.014	0.008	1	8
G6pc3	0.238683	-0.928201	0.047	0.073	1	8
1110059E24Rik	0.157839	-0.928104	0.112	0.158	1	8
Skic3	0.104677	-0.927771	0.084	0.13	1	8
Tfpi	0.875445	-0.927743	0.014	0.012	1	8
Tpst2	0.0671803	-0.92753	0.274	0.34	1	8
Hif1an	0.256035	-0.92741	0.07	0.101	1	8
Ppm1g	0.05812	-0.926885	0.172	0.243	1	8
Fbxo6	0.116087	-0.925777	0.079	0.121	1	8
Phkg2	0.47275	-0.925755	0.116	0.138	1	8
Rabggtb	0.362788	-0.924653	0.14	0.166	1	8
Zc3h4	0.863644	-0.924447	0.13	0.121	1	8
Bmp1	0.232931	-0.924414	0.005	0.016	1	8
Fam110a	0.674225	-0.924311	0.06	0.069	1	8
Rasl11a	0.76703	-0.924213	0.009	0.012	1	8
Dcakd	0.173493	-0.922473	0.07	0.105	1	8
Rnaset2b	0.011159	-0.922272	0.102	0.186	1	8
Mgst3	0.308427	-0.922174	0.06	0.085	1	8
Ifit1bl1	0.0929287	-0.921657	0.028	0.061	1	8
Nup155	0.505306	-0.921497	0.107	0.126	1	8
Poli	0.302681	-0.921345	0.023	0.04	1	8
Klrc2	0.0114474	-0.920775	0.023	0.077	1	8
Acap3	0.197435	-0.920645	0.037	0.065	1	8
Slc25a22	0.370784	-0.920387	0.06	0.081	1	8
Hic2	0.649258	-0.918844	0.051	0.061	1	8
Gins3	0.131637	-0.918514	0.033	0.012	1	8
Rgmb	0.49827	-0.917857	0.019	0.028	1	8
Acd	0.512404	-0.917511	0.065	0.081	1	8
Gnpda2	0.456208	-0.917045	0.07	0.089	1	8
Wdr24	0.131393	-0.915875	0.014	0.036	1	8
Sac3d1	0.603791	-0.915799	0.065	0.053	1	8
Snx32	0.488255	-0.915018	0.019	0.028	1	8
Slf1	0.0300962	-0.915009	0.07	0.134	1	8
Ess2	0.590296	-0.912503	0.056	0.069	1	8
Mettl14	0.836369	-0.912117	0.07	0.073	1	8
Aktip	0.59604	-0.912044	0.042	0.053	1	8
Sepsecs	0.41702	-0.911275	0.065	0.085	1	8
Pdcd1lg2	0.342219	-0.911258	0.098	0.126	1	8
Tubb2b	0.724511	-0.911021	0.023	0.028	1	8
Zfp595	0.47544	-0.910689	0.042	0.057	1	8
Mmadhc	0.709757	-0.909472	0.116	0.126	1	8
ENSMUSG00000079800	0.107671	-0.908992	0.023	0.053	1	8
Pigh	0.464051	-0.908851	0.042	0.057	1	8
Herpud2	0.993202	-0.908141	0.172	0.17	1	8
Gpr174	0.18086	-0.907761	0.028	0.053	1	8
9030025P20Rik	0.511012	-0.907698	0.009	0.016	1	8
Wdr4	0.112779	-0.907672	0.023	0.053	1	8
Myo15a	0.232931	-0.907313	0.005	0.016	1	8
Gpr137c	0.801872	-0.907058	0.06	0.065	1	8
Lin9	0.648	-0.906973	0.051	0.061	1	8
Mylpf	0.888602	-0.906837	0.019	0.02	1	8
Tnfrsf25	0.359358	-0.906486	0.019	0.032	1	8
Tmprss6	0.386293	-0.906231	0.005	0.012	1	8
Riok1	0.829661	-0.90593	0.167	0.174	1	8
Tpm3-rs7	0.824425	-0.905335	0.028	0.024	1	8
Sap30l	0.123915	-0.905021	0.135	0.186	1	8
Xlr4c	0.339982	-0.904489	0.009	0.02	1	8
Maged1	0.383911	-0.903857	0.005	0.012	1	8
H4c14	0.820557	-0.903826	0.056	0.061	1	8
Galt	0.839343	-0.903502	0.065	0.061	1	8
Gm14399	0.900142	-0.902866	0.019	0.02	1	8
Traip	0.386293	-0.902435	0.005	0.012	1	8
Gucd1	0.222848	-0.902315	0.13	0.17	1	8
Zbp1	0.000469617	-0.901496	0.293	0.437	1	8
Gm28043	0.386293	-0.901269	0.005	0.012	1	8
Depdc7	0.659337	-0.901246	0.074	0.085	1	8
Hook2	0.932538	-0.901116	0.023	0.024	1	8
Arrdc4	0.893018	-0.900782	0.088	0.093	1	8
Lilra6	0.885602	-0.900658	0.098	0.101	1	8
Plau	0.402304	-0.900452	0.023	0.036	1	8
Ilvbl	0.850483	-0.900427	0.084	0.077	1	8
Tab3	0.222041	-0.899784	0.074	0.109	1	8
Armc1	0.0203033	-0.899093	0.098	0.174	1	8
Trmt6	0.0981256	-0.898623	0.126	0.182	1	8
Mks1	0.252726	-0.898581	0.019	0.036	1	8
Mogs	0.427771	-0.898501	0.121	0.146	1	8
Tor3a	0.0525135	-0.897941	0.167	0.239	1	8
Zdhhc7	0.0781879	-0.897526	0.098	0.154	1	8
Hdac7	0.5027	-0.89727	0.14	0.162	1	8
Tpp1	0.587863	-0.897058	0.14	0.158	1	8
Mtr	0.0418918	-0.896515	0.121	0.194	1	8
Avpi1	0.711611	-0.896499	0.247	0.255	1	8
Abca13	0.761084	-0.896294	0.009	0.012	1	8
Zfp318	0.0929513	-0.895771	0.042	0.081	1	8
Tnni3	0.354066	-0.895487	0.019	0.032	1	8
Rabl3	0.585582	-0.895404	0.042	0.053	1	8
Shf	0.508724	-0.89514	0.009	0.016	1	8
Zfp560	0.188975	-0.894843	0.088	0.126	1	8
Mfsd12	0.456287	-0.894615	0.079	0.097	1	8
Tmem183a	0.313506	-0.893385	0.135	0.166	1	8
Asap2	0.121901	-0.892386	0.07	0.113	1	8
Slc31a1	0.320963	-0.891789	0.172	0.202	1	8
Tesk1	0.239173	-0.891092	0.098	0.134	1	8
Atp23	0.249056	-0.890848	0.065	0.04	1	8
Pira1	0.341656	-0.890676	0.009	0.02	1	8
Ndufaf6	0.354198	-0.890675	0.042	0.061	1	8
Timm9	0.595006	-0.890557	0.116	0.134	1	8
Mbd4	0.140196	-0.889575	0.028	0.057	1	8
Ccdc71	0.8686	-0.888563	0.042	0.045	1	8
Rnf25	0.805157	-0.888005	0.079	0.073	1	8
Naa25	0.641054	-0.887986	0.121	0.134	1	8
Rgl2	0.611191	-0.887478	0.149	0.166	1	8
Tmtc3	0.252726	-0.886545	0.019	0.036	1	8
Ulbp1	0.0882588	-0.886139	0.014	0.04	1	8
Bst2	0.0131985	-0.88551	0.558	0.619	1	8
Timm8a1	0.909148	-0.884637	0.102	0.105	1	8
Srp68	0.224293	-0.884529	0.135	0.174	1	8
Kdm2b	0.349078	-0.884198	0.172	0.198	1	8
Unc119	0.0527027	-0.883503	0.195	0.259	1	8
Urb1	0.552918	-0.883265	0.037	0.049	1	8
Pfdn4	0.0306892	-0.883093	0.153	0.235	1	8
Rbm12b2	0.119099	-0.882941	0.019	0.045	1	8
Kifc3	0.451355	-0.882585	0.028	0.04	1	8
Orc5	0.221479	-0.881814	0.051	0.081	1	8
Hal	0.772991	-0.88044	0.009	0.012	1	8
Smpd2	0.345234	-0.880202	0.051	0.073	1	8
Scly	0.261614	-0.879299	0.042	0.065	1	8
Lrrc39	0.770009	-0.878662	0.009	0.012	1	8
Cfap53	0.508724	-0.877785	0.009	0.016	1	8
Rpp25l	0.119466	-0.877704	0.112	0.162	1	8
Ralgps1	0.798802	-0.877599	0.102	0.109	1	8
Rdm1	0.736143	-0.876408	0.14	0.146	1	8
Sdhc	0.185043	-0.876104	0.219	0.267	1	8
Rnf26	0.142939	-0.874761	0.009	0.028	1	8
Smyd5	0.132043	-0.873295	0.014	0.036	1	8
Pros1	0.734944	-0.873056	0.102	0.109	1	8
Fut11	0.366173	-0.872764	0.056	0.077	1	8
Xaf1	0.00351565	-0.870572	0.205	0.328	1	8
Ptp4a3	0.142098	-0.870372	0.149	0.202	1	8
Cpq	0.474992	-0.869473	0.172	0.194	1	8
Herc2	0.117438	-0.869213	0.228	0.275	1	8
Lrrc75a	0.293541	-0.86898	0.014	0.028	1	8
Inpp5e	0.400984	-0.868422	0.023	0.036	1	8
Gmeb1	0.519015	-0.868327	0.102	0.121	1	8
Strip2	0.215413	-0.868216	0.033	0.057	1	8
Magee1	0.764055	-0.867887	0.009	0.012	1	8
Ccnd1	0.158302	-0.865359	0.042	0.073	1	8
Mad2l2	0.255638	-0.865046	0.051	0.077	1	8
Hopx	0.0725211	-0.863021	0.195	0.263	1	8
Gm45902	0.05578	-0.862801	0.019	0.053	1	8
Gpr160	0.459226	-0.862522	0.056	0.073	1	8
Spast	0.365211	-0.862207	0.181	0.211	1	8
Ly6c2	0.0952271	-0.861703	0.428	0.457	1	8
Lpin1	0.187692	-0.86146	0.121	0.162	1	8
Tlr1	0.886016	-0.860385	0.093	0.097	1	8
Wdr5b	0.234462	-0.860327	0.005	0.016	1	8
Med25	0.323019	-0.858506	0.065	0.089	1	8
Ttc39b	0.0313508	-0.858193	0.116	0.19	1	8
Dennd11	0.221204	-0.857979	0.033	0.057	1	8
Zfp68	0.165998	-0.857975	0.065	0.101	1	8
Ltbr	0.440303	-0.857108	0.163	0.186	1	8
Nherf2	0.235999	-0.856363	0.005	0.016	1	8
Ears2	0.415543	-0.854992	0.014	0.024	1	8
Dmac2l	0.154784	-0.852675	0.042	0.073	1	8
Hvcn1	0.123382	-0.852666	0.112	0.162	1	8
Nup160	0.558966	-0.852402	0.079	0.093	1	8
Samd9l	0.0503666	-0.851918	0.298	0.377	1	8
Map3k11	0.185872	-0.851267	0.167	0.211	1	8
Zgpat	0.144633	-0.850994	0.056	0.093	1	8
Pacsin1	0.131393	-0.85004	0.014	0.036	1	8
Chsy1	0.109862	-0.849898	0.195	0.251	1	8
Tmem86b	0.67129	-0.849442	0.037	0.045	1	8
Pa2g4	0.237829	-0.848835	0.205	0.251	1	8
Nkrf	0.513305	-0.848436	0.009	0.016	1	8
Ints9	0.363377	-0.847386	0.116	0.142	1	8
Morc2a	0.331926	-0.84718	0.079	0.105	1	8
Jazf1	0.583224	-0.846547	0.056	0.045	1	8
Pigm	0.488291	-0.844551	0.084	0.101	1	8
Armc6	0.945165	-0.844392	0.023	0.024	1	8
Recql	0.29461	-0.843831	0.074	0.101	1	8
Ccl4	0.0722011	-0.843621	0.102	0.158	1	8
Ccar2	0.616738	-0.843279	0.047	0.057	1	8
Eef1akmt4	0.359274	-0.842702	0.028	0.045	1	8
Sned1	0.386293	-0.842157	0.005	0.012	1	8
Gimap5	0.273345	-0.842103	0.07	0.097	1	8
Gpsm2	0.402304	-0.84135	0.023	0.036	1	8
Klf16	0.141353	-0.841333	0.009	0.028	1	8
Rab4b	0.356706	-0.840942	0.019	0.032	1	8
Slamf1	0.520216	-0.840681	0.009	0.016	1	8
Hmces	0.103232	-0.838652	0.037	0.073	1	8
Ifi35	0.00790722	-0.837731	0.251	0.364	1	8
Calhm6	0.0763448	-0.837463	0.316	0.368	1	8
Sh2d2a	0.0288144	-0.837207	0.037	0.089	1	8
Enkur	0.336651	-0.837157	0.009	0.02	1	8
Rbl1	0.141147	-0.836383	0.079	0.121	1	8
Hmgxb3	0.489468	-0.836318	0.079	0.097	1	8
Mbd3	0.0516758	-0.836307	0.167	0.239	1	8
Ddx56	0.302509	-0.836277	0.074	0.101	1	8
Zfand4	0.295508	-0.834514	0.033	0.053	1	8
Tmem106b	0.31098	-0.834008	0.112	0.142	1	8
Fra10ac1	0.183772	-0.833629	0.074	0.109	1	8
Nup35	0.733049	-0.833542	0.047	0.053	1	8
Matcap1	0.508393	-0.833066	0.019	0.028	1	8
Cenpt	0.849193	-0.833027	0.019	0.016	1	8
Txnl4b	0.35013	-0.8329	0.019	0.032	1	8
Pakap.2	0.386293	-0.832595	0.005	0.012	1	8
Tpgs1	0.0668878	-0.831858	0.186	0.255	1	8
Mtrf1l	0.85683	-0.831388	0.07	0.065	1	8
Heatr6	0.522826	-0.831263	0.112	0.13	1	8
Dennd2a	0.761084	-0.831124	0.009	0.012	1	8
Gm35339	0.388684	-0.831049	0.005	0.012	1	8
E2f2	0.174232	-0.83097	0.219	0.267	1	8
Snx19	0.653973	-0.830828	0.074	0.085	1	8
Ikbkg	0.717087	-0.830074	0.056	0.065	1	8
Zfp429	0.827283	-0.829533	0.084	0.077	1	8
Dok2	0.248796	-0.829451	0.065	0.093	1	8
Dennd3	0.425248	-0.828778	0.051	0.069	1	8
Ccdc66	0.499565	-0.828584	0.033	0.045	1	8
Gimap8	0.45009	-0.827715	0.098	0.117	1	8
D3Ertd751e	0.85692	-0.827645	0.042	0.045	1	8
Pard3b	0.496921	-0.82655	0.033	0.045	1	8
Rab19	0.164694	-0.826345	0.088	0.13	1	8
Atp13a2	0.321656	-0.825409	0.195	0.231	1	8
Cd38	0.0730145	-0.825298	0.047	0.089	1	8
Plk2	0.256555	-0.824983	0.13	0.166	1	8
Ctsw	0.136861	-0.824546	0.121	0.166	1	8
Pcdh7	0.386293	-0.823991	0.005	0.012	1	8
Rfc3	0.616576	-0.823509	0.06	0.049	1	8
Sox4	0.530518	-0.822801	0.051	0.065	1	8
Gprc5a	0.555079	-0.822144	0.023	0.032	1	8
Ang	0.728317	-0.821882	0.023	0.028	1	8
Tuba1b	0.0193907	-0.821523	0.242	0.344	1	8
Psmc5	0.0162516	-0.820521	0.293	0.385	1	8
Aga	0.852522	-0.820241	0.112	0.105	1	8
Anxa3	0.043512	-0.818982	0.149	0.223	1	8
Ddx55	0.409311	-0.818924	0.084	0.105	1	8
Smarcal1	0.494988	-0.818289	0.07	0.085	1	8
Rasal2	0.0839849	-0.817873	0.088	0.142	1	8
Zbtb43	0.479059	-0.817611	0.051	0.069	1	8
Timmdc1	0.891014	-0.816852	0.135	0.138	1	8
Rps6ka4	0.353843	-0.816456	0.098	0.121	1	8
Il4i1	0.0316944	-0.816217	0.167	0.243	1	8
Alkbh3	0.202584	-0.815941	0.126	0.166	1	8
Ubqln2	0.188736	-0.814065	0.07	0.105	1	8
Letm2	0.191611	-0.813839	0.07	0.105	1	8
Slc52a2	0.424044	-0.813371	0.037	0.053	1	8
Rabl6	0.55587	-0.811922	0.172	0.19	1	8
Lrrcc1	0.31809	-0.811759	0.047	0.069	1	8
Syngr1	0.297375	-0.811613	0.023	0.04	1	8
Irgm1	0.0291717	-0.811251	0.135	0.211	1	8
Ubxn2b	0.264984	-0.811023	0.065	0.093	1	8
Pla2g2d	0.0849039	-0.810935	0.07	0.117	1	8
Nup93	0.747782	-0.810634	0.088	0.097	1	8
Irgc1	0.294882	-0.810207	0.088	0.117	1	8
Or2v1	0.492698	-0.809136	0.047	0.061	1	8
Sirt6	0.933666	-0.808275	0.047	0.045	1	8
Mrpl38	0.218963	-0.808092	0.14	0.178	1	8
Gm21985	0.169839	-0.807708	0.019	0.04	1	8
Acbd4	0.253739	-0.807286	0.019	0.036	1	8
Strip1	0.90799	-0.807097	0.093	0.089	1	8
Trim26	0.199931	-0.807	0.247	0.283	1	8
Rxylt1	0.800962	-0.806907	0.181	0.19	1	8
Or13a27	0.545699	-0.806881	0.014	0.008	1	8
Kcnq5	0.476218	-0.806567	0.079	0.097	1	8
Acadvl	0.244022	-0.805362	0.13	0.166	1	8
Cntln	0.647388	-0.805311	0.084	0.097	1	8
Myo19	0.142183	-0.80518	0.005	0.02	1	8
Cd300e	0.844933	-0.804584	0.07	0.073	1	8
Hadha	0.193044	-0.804563	0.279	0.336	1	8
Plxna2	0.386293	-0.804309	0.005	0.012	1	8
Spcs1	0.21634	-0.803871	0.34	0.381	1	8
Tmem276	0.453932	-0.803774	0.042	0.057	1	8
Abl1	0.334047	-0.80368	0.186	0.227	1	8
Gm14296	0.234462	-0.802048	0.005	0.016	1	8
Kctd19	0.858895	-0.80183	0.019	0.016	1	8
Fam3a	0.157796	-0.801479	0.042	0.073	1	8
Pcdh17	0.0573188	-0.801113	0.014	0.045	1	8
Upp1	0.776806	-0.800563	0.028	0.032	1	8
Itga6	0.628294	-0.799771	0.047	0.057	1	8
Qpctl	0.588188	-0.799386	0.042	0.053	1	8
Mzt1	0.67019	-0.799293	0.144	0.154	1	8
Meis1	0.539131	-0.79832	0.116	0.134	1	8
Lrp5	0.17856	-0.798119	0.102	0.142	1	8
Lifr	0.632859	-0.798083	0.098	0.085	1	8
Slfn9	0.97586	-0.797581	0.065	0.065	1	8
Senp3	0.721655	-0.797544	0.112	0.121	1	8
Exoc1	0.931744	-0.79665	0.121	0.121	1	8
Ate1	0.70506	-0.796514	0.149	0.158	1	8
She	0.326375	-0.796051	0.019	0.008	1	8
Usp50	0.674638	-0.794787	0.056	0.065	1	8
Nf2	0.0850207	-0.793795	0.093	0.146	1	8
Gid8	0.599962	-0.793705	0.153	0.17	1	8
Hmgn1	0.128054	-0.793595	0.13	0.182	1	8
H2bc11	0.907443	-0.793492	0.051	0.053	1	8
Casp9	0.477044	-0.792964	0.06	0.077	1	8
3830403N18Rik	0.897832	-0.792756	0.019	0.02	1	8
Cited4	0.559048	-0.79259	0.051	0.065	1	8
Upf3a	0.183935	-0.792585	0.13	0.17	1	8
Nop14	0.698668	-0.791573	0.135	0.146	1	8
Ranbp10	0.235214	-0.791164	0.181	0.223	1	8
Brat1	0.477736	-0.791024	0.042	0.057	1	8
Zbtb10	0.430656	-0.790776	0.084	0.105	1	8
Brd3	0.181647	-0.790747	0.144	0.186	1	8
Tmem192	0.276958	-0.790714	0.233	0.275	1	8
Zbtb24	0.0346623	-0.790494	0.074	0.138	1	8
Trmt2a	0.336216	-0.789959	0.074	0.101	1	8
Exoc7	0.165612	-0.789692	0.098	0.142	1	8
Cables2	0.736986	-0.789189	0.06	0.053	1	8
Bpgm	0.433834	-0.789184	0.056	0.073	1	8
Rbm17	0.0347465	-0.788887	0.256	0.34	1	8
Tmem163	0.133916	-0.788273	0.028	0.057	1	8
Ormdl1	0.596462	-0.788203	0.088	0.101	1	8
Slfn5	0.0059363	-0.788161	0.353	0.462	1	8
Pde2a	0.682693	-0.787541	0.019	0.024	1	8
Limk2	0.703873	-0.787482	0.112	0.126	1	8
Zhx3	0.38322	-0.787451	0.047	0.065	1	8
Pex13	0.411935	-0.787406	0.205	0.235	1	8
Rundc3b	0.778083	-0.78703	0.056	0.061	1	8
Lingo1	0.386293	-0.786665	0.005	0.012	1	8
Tgs1	0.534314	-0.785804	0.279	0.296	1	8
Cyp4f13	0.699951	-0.785285	0.135	0.146	1	8
Zc3h8	0.815914	-0.784908	0.023	0.02	1	8
Thg1l	0.851616	-0.784568	0.019	0.016	1	8
Sirt7	0.0524067	-0.784131	0.288	0.377	1	8
Klhdc4	0.927111	-0.783857	0.093	0.093	1	8
Sv2c	0.386293	-0.783567	0.005	0.012	1	8
Zmynd15	0.307936	-0.783515	0.047	0.028	1	8
Shfl	0.491581	-0.783434	0.019	0.028	1	8
Fam83f	0.292133	-0.783058	0.023	0.04	1	8
Trim37	0.675504	-0.782263	0.084	0.073	1	8
Nckap1	0.248702	-0.781773	0.019	0.036	1	8
Rufy1	0.228626	-0.781767	0.153	0.194	1	8
Nt5m	0.257899	-0.780398	0.06	0.089	1	8
Prkab1	0.560776	-0.780263	0.098	0.113	1	8
Svbp	0.160917	-0.780036	0.205	0.259	1	8
Sec24b	0.0149538	-0.779545	0.293	0.413	1	8
Naa10	0.332574	-0.779028	0.14	0.17	1	8
Vps26a	0.238113	-0.77901	0.33	0.352	1	8
Ctif	0.486935	-0.778869	0.06	0.077	1	8
Prkcz	0.970819	-0.778218	0.028	0.028	1	8
Cdc40	0.0797025	-0.778057	0.316	0.372	1	8
Gbp3	0.176603	-0.777305	0.135	0.182	1	8
Slc39a3	0.280223	-0.776712	0.042	0.065	1	8
Gpn3	0.671521	-0.775825	0.135	0.121	1	8
Crispld2	0.338314	-0.77573	0.009	0.02	1	8
Emc2	0.0736287	-0.775556	0.256	0.32	1	8
Zdhhc21	0.174153	-0.77515	0.144	0.194	1	8
Jrkl	0.296121	-0.774968	0.047	0.069	1	8
Nckap5	0.215993	-0.774064	0.023	0.045	1	8
Adamts6	0.497031	-0.773472	0.093	0.109	1	8
Smu1	0.00269785	-0.772939	0.177	0.296	1	8
G2e3	0.184935	-0.772864	0.06	0.093	1	8
Sh3bgrl2	0.234462	-0.77224	0.005	0.016	1	8
Stx18	0.0297569	-0.772196	0.177	0.263	1	8
Tbc1d12	0.33243	-0.770901	0.093	0.069	1	8
Serpina3f	0.391085	-0.770518	0.005	0.012	1	8
Tmem126b	0.522664	-0.769405	0.051	0.065	1	8
Pard6g	0.143154	-0.769204	0.005	0.02	1	8
Smim40	0.284365	-0.768461	0.056	0.081	1	8
Cep104	0.597593	-0.767773	0.028	0.036	1	8
Wasl	0.149253	-0.767656	0.209	0.271	1	8
Stat2	0.0180007	-0.767291	0.242	0.332	1	8
Jak3	0.63066	-0.767048	0.102	0.089	1	8
Igfbp7	0.598377	-0.767034	0.06	0.073	1	8
Zbtb33	0.657581	-0.766838	0.06	0.069	1	8
Cstf2t	0.419387	-0.765682	0.051	0.069	1	8
Clcc1	0.6408	-0.765299	0.153	0.138	1	8
Ticam1	0.304946	-0.764967	0.047	0.069	1	8
Ifi204	0.0135146	-0.764891	0.372	0.466	1	8
Pcsk7	0.244014	-0.764778	0.191	0.231	1	8
Spen	0.0959722	-0.764535	0.288	0.352	1	8
Exosc1	0.087981	-0.76424	0.116	0.174	1	8
Bcl9	0.836628	-0.764086	0.06	0.057	1	8
Cbx8	0.770104	-0.764083	0.047	0.04	1	8
Gm53012	0.293541	-0.763631	0.014	0.028	1	8
Fam98c	0.312099	-0.763561	0.144	0.178	1	8
Mlst8	0.883436	-0.76289	0.042	0.045	1	8
Trim5	0.0228463	-0.762851	0.056	0.117	1	8
Tecpr2	0.577741	-0.762491	0.056	0.069	1	8
Abcg3	0.0437037	-0.762145	0.256	0.332	1	8
Gmpr2	0.661648	-0.762056	0.112	0.121	1	8
Tbxas1	0.551608	-0.761865	0.163	0.178	1	8
Rpa1	0.122855	-0.761731	0.135	0.186	1	8
Ifi209	0.0515226	-0.761598	0.367	0.445	1	8
Oard1	0.22919	-0.761158	0.167	0.206	1	8
Traf3ip1	0.408946	-0.760819	0.023	0.036	1	8
Poc1b	0.350996	-0.76067	0.065	0.089	1	8
Ddah1	0.739774	-0.760286	0.023	0.028	1	8
Tnfrsf18	0.295328	-0.760165	0.047	0.069	1	8
Slc30a6	0.350746	-0.759909	0.074	0.097	1	8
Pfas	0.820299	-0.759653	0.033	0.036	1	8
Lmf2	0.124027	-0.759557	0.019	0.045	1	8
Zbtb5	0.875872	-0.75928	0.065	0.061	1	8
E2f4	0.288028	-0.758963	0.116	0.15	1	8
Il12rb1	0.338314	-0.758634	0.009	0.02	1	8
Cenpj	0.25782	-0.758608	0.019	0.036	1	8
Ttc39c	0.125226	-0.758446	0.084	0.13	1	8
Ifitm1	0.601247	-0.75766	0.079	0.065	1	8
Sema4f	0.221396	-0.757303	0.009	0.024	1	8
Cdpf1	0.273791	-0.757047	0.056	0.081	1	8
Gm44511	0.226411	-0.7563	0.135	0.174	1	8
Slfn8	0.0418334	-0.755972	0.247	0.324	1	8
Tsg101	0.357846	-0.75572	0.27	0.304	1	8
Slc39a14	0.610288	-0.755351	0.028	0.036	1	8
Ndufaf4	0.840128	-0.753667	0.088	0.093	1	8
Poglut3	0.782221	-0.753469	0.028	0.032	1	8
Stk11ip	0.228734	-0.753411	0.056	0.032	1	8
Alpk2	0.835286	-0.753279	0.056	0.061	1	8
Slc25a45	0.101458	-0.753195	0.121	0.178	1	8
Cdk2	0.851421	-0.753056	0.056	0.061	1	8
Golga3	0.936155	-0.752788	0.126	0.126	1	8
Htr1f	0.822377	-0.752674	0.023	0.02	1	8
Carmil2	0.178031	-0.752666	0.019	0.04	1	8
Arc	0.513305	-0.752317	0.009	0.016	1	8
Zfp709	0.596654	-0.751785	0.06	0.049	1	8
Bgn	0.234462	-0.751431	0.005	0.016	1	8
Gramd3	0.560483	-0.751167	0.153	0.17	1	8
Cd79a	0.605618	-0.750474	0.014	0.02	1	8
Tapbpl	0.0310948	-0.750147	0.135	0.211	1	8
Mrpl46	0.605134	-0.749923	0.116	0.134	1	8
Zfp985	0.383911	-0.748689	0.005	0.012	1	8
Llgl2	0.94306	-0.747795	0.023	0.024	1	8
Uhmk1	0.784858	-0.747761	0.214	0.219	1	8
Tm9sf1	0.60234	-0.747656	0.028	0.036	1	8
Alkbh7	0.359378	-0.747337	0.056	0.077	1	8
Zfp771	0.428172	-0.747304	0.098	0.121	1	8
Ifi214	0.0916526	-0.74685	0.051	0.093	1	8
Uimc1	0.19283	-0.746843	0.247	0.287	1	8
Mei4	0.232931	-0.746819	0.005	0.016	1	8
Ift27	0.819911	-0.74653	0.065	0.061	1	8
Fcgr1	0.54885	-0.746332	0.233	0.247	1	8
Crk	0.902379	-0.746187	0.367	0.356	1	8
Nectin1	0.632254	-0.745267	0.237	0.247	1	8
Trnau1ap	0.0589867	-0.74521	0.186	0.259	1	8
Pdlim7	0.134431	-0.745051	0.028	0.057	1	8
5730480H06Rik	0.810636	-0.744837	0.028	0.024	1	8
Nadsyn1	0.49827	-0.744366	0.019	0.028	1	8
Cdin1	0.9838	-0.744121	0.042	0.04	1	8
Ezh2	0.618243	-0.743859	0.153	0.17	1	8
Pnkp	0.333106	-0.742562	0.228	0.259	1	8
Uros	0.106763	-0.742288	0.023	0.053	1	8
Rsl1	0.07833	-0.742235	0.023	0.057	1	8
Mrc2	0.235999	-0.741809	0.005	0.016	1	8
Hgh1	0.517907	-0.741671	0.009	0.016	1	8
Mcm5	0.51693	-0.740934	0.033	0.045	1	8
Echdc1	0.812221	-0.739961	0.042	0.036	1	8
Ankrd46	0.331907	-0.738942	0.037	0.057	1	8
Utp14a	0.25261	-0.738646	0.228	0.275	1	8
Star	0.388684	-0.73814	0.005	0.012	1	8
Cln5	0.872211	-0.738107	0.149	0.142	1	8
Nle1	0.548559	-0.738086	0.023	0.032	1	8
Nudcd1	0.611979	-0.737236	0.033	0.024	1	8
Rpl9-ps6	0.352844	-0.737148	0.126	0.154	1	8
Nlrp12	0.605961	-0.736637	0.028	0.02	1	8
Trim34a	0.576951	-0.736285	0.135	0.154	1	8
Oma1	0.338663	-0.735798	0.121	0.15	1	8
Def6	0.162999	-0.735275	0.135	0.182	1	8
Sec61a2	0.553168	-0.735215	0.079	0.065	1	8
Stk39	0.273922	-0.734041	0.042	0.065	1	8
Ighmbp2	0.467414	-0.73383	0.028	0.04	1	8
Oasl1	0.102641	-0.733776	0.093	0.142	1	8
Rspo1	0.826399	-0.733547	0.028	0.024	1	8
Slc26a11	0.772056	-0.73324	0.088	0.097	1	8
Slbp	0.148377	-0.732956	0.27	0.34	1	8
Zfp830	0.207621	-0.732869	0.107	0.146	1	8
Cebpa	0.308323	-0.732735	0.233	0.271	1	8
Ccdc88b	0.0828872	-0.732535	0.144	0.202	1	8
Plp2	0.24347	-0.732031	0.107	0.142	1	8
2310009B15Rik	0.172196	-0.731943	0.172	0.215	1	8
Psme3	0.938876	-0.731916	0.172	0.17	1	8
Inhca	0.133649	-0.731495	0.056	0.093	1	8
Eefsec	0.227295	-0.730666	0.153	0.198	1	8
Slc1a5	0.42382	-0.729354	0.209	0.178	1	8
Casd1	0.922065	-0.728999	0.126	0.121	1	8
Ptcd2	0.970933	-0.727899	0.223	0.223	1	8
Haao	0.63884	-0.727612	0.144	0.126	1	8
Prdx4	0.771428	-0.727572	0.181	0.186	1	8
Hs6st2	0.341656	-0.727259	0.009	0.02	1	8
Gtf3a	0.0184127	-0.726955	0.13	0.215	1	8
Gnl3	0.078237	-0.726863	0.158	0.223	1	8
Spring1	0.813296	-0.726424	0.088	0.081	1	8
Casp4	0.0636491	-0.726007	0.293	0.368	1	8
Paxip1	0.598377	-0.725577	0.06	0.073	1	8
Ap1b1	0.208116	-0.725397	0.153	0.19	1	8
Ripor1	0.811735	-0.724792	0.033	0.036	1	8
Ppil4	0.0110747	-0.724629	0.209	0.312	1	8
Smarcc2	0.939145	-0.724564	0.265	0.259	1	8
Rnf34	0.757907	-0.724496	0.195	0.206	1	8
Slfn1	0.196992	-0.724253	0.237	0.283	1	8
Ddx11	0.234462	-0.724229	0.005	0.016	1	8
Macrod2	0.496593	-0.7237	0.019	0.028	1	8
Crkl	0.725192	-0.723424	0.126	0.113	1	8
Zfp992	0.665764	-0.722901	0.172	0.154	1	8
Rsad2	0.343431	-0.722758	0.149	0.178	1	8
Tug1	0.0789469	-0.722708	0.181	0.251	1	8
Lpar6	0.389729	-0.722569	0.214	0.247	1	8
Galnt2	0.347703	-0.722125	0.163	0.198	1	8
Rest	0.0677599	-0.721411	0.242	0.32	1	8
H2ac22	0.602271	-0.72064	0.028	0.02	1	8
Nek8	0.339982	-0.72037	0.009	0.02	1	8
Vipr1	0.234462	-0.720229	0.005	0.016	1	8
Ccdc126	0.310213	-0.719497	0.023	0.04	1	8
BC147527	0.26419	-0.719478	0.163	0.202	1	8
Mustn1	0.515603	-0.719366	0.009	0.016	1	8
Krba1	0.834683	-0.718719	0.019	0.016	1	8
Tmem14a	0.513305	-0.717601	0.009	0.016	1	8
Mecp2	0.792334	-0.717406	0.307	0.3	1	8
Ifng	0.0321368	-0.717281	0.028	0.073	1	8
Car7	0.0872112	-0.717223	0.005	0.024	1	8
Vac14	0.251758	-0.717035	0.149	0.186	1	8
Nfe2l3	0.601307	-0.716767	0.014	0.02	1	8
Atp8b2	0.915265	-0.716747	0.07	0.073	1	8
Catspere2	0.603461	-0.716659	0.014	0.02	1	8
Zfp748	0.602582	-0.716115	0.051	0.04	1	8
Parp6	0.511186	-0.715046	0.084	0.101	1	8
Akap9	0.754689	-0.715009	0.307	0.32	1	8
Smim35	0.589164	-0.71472	0.051	0.04	1	8
Dus1l	0.835401	-0.714677	0.102	0.105	1	8
Mterf3	0.92243	-0.714639	0.135	0.13	1	8
Sh2b1	0.868703	-0.714117	0.088	0.093	1	8
Kyat1	0.893215	-0.713207	0.019	0.02	1	8
Mns1	0.339982	-0.713154	0.009	0.02	1	8
Ehf	0.347236	-0.712897	0.07	0.049	1	8
Rac3	0.235999	-0.712824	0.005	0.016	1	8
Fan1	0.144538	-0.711333	0.009	0.028	1	8
Aurka	0.520216	-0.711294	0.009	0.016	1	8
Slc39a9	0.542797	-0.711145	0.093	0.109	1	8
Asf1a	0.347289	-0.711064	0.07	0.093	1	8
Ppif	0.112818	-0.709704	0.07	0.113	1	8
Zfp763	0.388684	-0.70963	0.005	0.012	1	8
Faf2	0.517687	-0.709475	0.186	0.206	1	8
Zfp366	0.932391	-0.7091	0.056	0.057	1	8
Nupl2	0.179734	-0.708268	0.037	0.065	1	8
Bod1	0.980033	-0.708125	0.033	0.032	1	8
Nos3	0.761084	-0.708011	0.009	0.012	1	8
Cabp4	0.50089	-0.707783	0.033	0.045	1	8
E2f8	0.511012	-0.707128	0.009	0.016	1	8
Fbrsl1	0.13685	-0.707113	0.26	0.332	1	8
Gm20661	0.143154	-0.707017	0.005	0.02	1	8
Fkbpl	0.882654	-0.70697	0.042	0.045	1	8
Srrd	0.707384	-0.706119	0.065	0.073	1	8
Emd	0.0688499	-0.705591	0.265	0.332	1	8
Oxnad1	0.540462	-0.705369	0.023	0.032	1	8
Gripap1	0.978572	-0.705116	0.247	0.243	1	8
H2-Q10	0.684667	-0.704904	0.037	0.045	1	8
Rfx5	0.920412	-0.704261	0.051	0.053	1	8
Snrnp35	0.204327	-0.704209	0.051	0.081	1	8
Tm2d1	0.211538	-0.704121	0.293	0.34	1	8
Gnl2	0.713396	-0.704101	0.144	0.154	1	8
Sh3gl1	0.00745171	-0.704007	0.102	0.194	1	8
Mtcl1	0.383911	-0.703349	0.005	0.012	1	8
Hhex	0.132301	-0.702469	0.181	0.243	1	8
Kansl3	0.487228	-0.701472	0.163	0.186	1	8
Vps33b	0.724674	-0.700695	0.056	0.065	1	8
Pira2	0.885228	-0.700114	0.06	0.057	1	8
Mindy2	0.431578	-0.699987	0.265	0.287	1	8
Mdm1	0.991997	-0.699771	0.074	0.073	1	8
Usb1	0.232268	-0.698171	0.07	0.101	1	8
Rrp1	0.00165765	-0.697821	0.247	0.377	1	8
Mbd6	0.502196	-0.697586	0.112	0.13	1	8
H2-Q7	0.00417528	-0.697059	0.521	0.603	1	8
Polr1g	0.687423	-0.69636	0.065	0.073	1	8
Pcgf6	0.933666	-0.696215	0.047	0.045	1	8
Trim32	0.070897	-0.695876	0.023	0.004	1	8
Armc5	0.959493	-0.694084	0.07	0.069	1	8
Garin5a	0.388684	-0.693619	0.005	0.012	1	8
Gatd1	0.187253	-0.69351	0.121	0.166	1	8
Nos1ap	0.728469	-0.69225	0.186	0.194	1	8
Ndst1	0.309719	-0.6915	0.088	0.117	1	8
Cdkn2d	0.190179	-0.691491	0.14	0.182	1	8
Trappc5	0.311297	-0.691287	0.219	0.259	1	8
Slc38a9	0.0221752	-0.691215	0.177	0.275	1	8
Carmil1	0.260025	-0.691199	0.028	0.049	1	8
Dhx58	0.54477	-0.690898	0.121	0.142	1	8
Rcbtb1	0.632361	-0.690782	0.084	0.097	1	8
Wdr75	0.461478	-0.690622	0.065	0.049	1	8
Degs2	0.388684	-0.690599	0.005	0.012	1	8
Cdc42bpb	0.810269	-0.690472	0.186	0.174	1	8
Dnaja4	0.671174	-0.690294	0.079	0.089	1	8
Hcfc1	0.213711	-0.690217	0.135	0.178	1	8
Pex12	0.594728	-0.689866	0.042	0.053	1	8
Rnf217	0.798513	-0.689784	0.102	0.105	1	8
Med16	0.510315	-0.689707	0.07	0.085	1	8
Ccdc167	0.774202	-0.689519	0.051	0.057	1	8
Chst1	0.589919	-0.688948	0.033	0.024	1	8
Nup107	0.883068	-0.688762	0.07	0.073	1	8
Wdr46	0.93021	-0.68857	0.107	0.105	1	8
Cacng8	0.545699	-0.688311	0.014	0.008	1	8
Zfp455	0.388684	-0.686722	0.005	0.012	1	8
Osbpl5	0.802782	-0.686488	0.028	0.024	1	8
Hmcn2	0.511012	-0.686475	0.009	0.016	1	8
Slc5a3	0.407612	-0.686409	0.023	0.036	1	8
Gpr180	0.650517	-0.686296	0.051	0.061	1	8
Nubpl	0.309014	-0.686082	0.047	0.069	1	8
Tppp3	0.802811	-0.685182	0.14	0.146	1	8
Tmtc2	0.172764	-0.685179	0.084	0.126	1	8
Polr1has	0.425644	-0.684917	0.014	0.024	1	8
Neurl1b	0.68066	-0.684715	0.019	0.024	1	8
Dek	0.0697513	-0.684211	0.474	0.526	1	8
Klra17	0.493249	-0.68416	0.019	0.028	1	8
Ly6i	0.0312079	-0.683874	0.326	0.417	1	8
Anxa7	0.485179	-0.683464	0.205	0.231	1	8
Kcnj2	0.475999	-0.682945	0.047	0.061	1	8
Stau2	0.486596	-0.68239	0.019	0.028	1	8
Trim33	0.699861	-0.682168	0.321	0.304	1	8
Gapt	0.531645	-0.681411	0.051	0.065	1	8
Trim7	0.416233	-0.681104	0.037	0.053	1	8
Rabgap1	0.476914	-0.680391	0.214	0.235	1	8
Orc3	0.488922	-0.680301	0.153	0.174	1	8
Taf6l	0.6543	-0.677924	0.051	0.061	1	8
Bhlhe41	0.235999	-0.677756	0.005	0.016	1	8
Kif1b	0.990732	-0.677084	0.242	0.243	1	8
Ror1	0.840382	-0.677019	0.014	0.016	1	8
Agpat1	0.763548	-0.676973	0.144	0.154	1	8
Adck1	0.28645	-0.676583	0.088	0.117	1	8
Trim12c	0.366995	-0.676483	0.228	0.259	1	8
Rilp	0.339982	-0.675987	0.009	0.02	1	8
Gm12184	0.513305	-0.675661	0.009	0.016	1	8
Ybx3	0.0787063	-0.67563	0.34	0.393	1	8
Fmo5	0.58783	-0.674675	0.051	0.04	1	8
Tonsl	0.386293	-0.674216	0.005	0.012	1	8
Gnl1	0.687509	-0.673869	0.074	0.085	1	8
Vps51	0.111294	-0.673377	0.116	0.166	1	8
Pilra	0.158685	-0.673308	0.265	0.324	1	8
Megf8	0.81457	-0.673222	0.028	0.024	1	8
Ifnar2	0.109328	-0.673013	0.4	0.462	1	8
Sp4	0.786628	-0.672636	0.153	0.162	1	8
Fasn	0.104347	-0.672385	0.037	0.073	1	8
Tjap1	0.729318	-0.672327	0.079	0.085	1	8
Mrgbp	0.144523	-0.672149	0.098	0.142	1	8
Xdh	0.107691	-0.671298	0.409	0.466	1	8
Tmem64	0.575553	-0.671175	0.102	0.117	1	8
Sfswap	0.464695	-0.671075	0.26	0.291	1	8
Mlx	0.350548	-0.670902	0.14	0.17	1	8
H2ac6	0.626474	-0.670748	0.102	0.117	1	8
Dab2ip	0.354066	-0.669693	0.019	0.032	1	8
Fam89a	0.76703	-0.669435	0.009	0.012	1	8
Hyal1	0.517907	-0.66921	0.009	0.016	1	8
Ubl7	0.0685045	-0.668955	0.14	0.206	1	8
Htatsf1	0.231314	-0.668781	0.112	0.15	1	8
Cfap36	0.443086	-0.668563	0.102	0.081	1	8
Kctd3	0.586129	-0.668504	0.06	0.073	1	8
Gzf1	0.761473	-0.668503	0.088	0.097	1	8
Wnt11	0.200419	-0.667827	0.014	0.032	1	8
Ube2e2	0.785924	-0.667778	0.07	0.077	1	8
Trpm2	0.235124	-0.666634	0.074	0.105	1	8
Nopchap1	0.348	-0.666076	0.112	0.142	1	8
Nhej1	0.810025	-0.665777	0.033	0.036	1	8
Tap1	0.477417	-0.665719	0.423	0.429	1	8
Cd69	0.291481	-0.665538	0.167	0.194	1	8
Polr2m	0.419735	-0.664735	0.228	0.263	1	8
Taok2	0.347949	-0.664522	0.093	0.121	1	8
Scyl1	0.579258	-0.664476	0.102	0.121	1	8
Eid2b	0.558353	-0.66433	0.023	0.032	1	8
Serpinb9	0.155046	-0.664111	0.06	0.097	1	8
Bcl2a1b	0.107885	-0.664016	0.428	0.47	1	8
Metap1d	0.980499	-0.66373	0.098	0.097	1	8
Pgghg	0.781688	-0.663702	0.102	0.109	1	8
Shkbp1	0.457249	-0.663696	0.14	0.113	1	8
Ptpn3	0.58527	-0.663571	0.023	0.016	1	8
Dnase1l3	0.135264	-0.663402	0.098	0.142	1	8
Fdxr	0.156375	-0.663152	0.051	0.085	1	8
Vkorc1l1	0.165692	-0.662769	0.13	0.178	1	8
Camkmt	0.133954	-0.662137	0.177	0.231	1	8
Nudt2	0.451701	-0.661983	0.042	0.057	1	8
Tfdp1	0.621024	-0.661722	0.102	0.117	1	8
Pcnx3	0.857927	-0.661329	0.093	0.097	1	8
Tmem116	0.761084	-0.661299	0.009	0.012	1	8
Ccng2	0.301385	-0.661165	0.102	0.134	1	8
Ext2	0.623919	-0.661138	0.14	0.154	1	8
Pla2g4a	0.560419	-0.66095	0.144	0.162	1	8
Cdc123	0.956572	-0.660897	0.228	0.223	1	8
Ddx31	0.917324	-0.660888	0.051	0.049	1	8
Colgalt1	0.592725	-0.660405	0.247	0.267	1	8
Dda1	0.578476	-0.659405	0.191	0.211	1	8
Specc1l	0.923037	-0.659397	0.312	0.304	1	8
Grk6	0.155777	-0.659134	0.186	0.239	1	8
Kctd16	0.837503	-0.659112	0.023	0.02	1	8
Alkbh6	0.617483	-0.658779	0.084	0.097	1	8
Snrpd1	0.0326834	-0.658665	0.367	0.433	1	8
Gpr155	0.215554	-0.658441	0.042	0.069	1	8
Atpsckmt	0.0862718	-0.658077	0.065	0.113	1	8
Kat14	0.156685	-0.657826	0.07	0.109	1	8
Ppip5k2	0.709792	-0.657711	0.167	0.182	1	8
Atxn2	0.415844	-0.657059	0.195	0.227	1	8
Cul1	0.256521	-0.65654	0.395	0.425	1	8
Sae1	0.244511	-0.655948	0.163	0.206	1	8
Dars2	0.714743	-0.655924	0.037	0.045	1	8
Sdf2	0.257391	-0.655506	0.279	0.324	1	8
Hyi	0.549992	-0.655308	0.158	0.134	1	8
Septin6	0.192381	-0.655298	0.186	0.239	1	8
Pld3	0.140497	-0.655111	0.098	0.142	1	8
Tsr3	0.544322	-0.655042	0.074	0.089	1	8
Yeats2	0.648807	-0.654518	0.088	0.101	1	8
Gm20498	0.603461	-0.654428	0.014	0.02	1	8
Gnal	0.987293	-0.654293	0.033	0.032	1	8
Ppp5c	0.846521	-0.653093	0.135	0.13	1	8
Ftsj3	0.615479	-0.65304	0.065	0.077	1	8
Ddx50	0.0631696	-0.653019	0.26	0.34	1	8
Exoc6	0.586662	-0.652987	0.316	0.328	1	8
Med19	0.266652	-0.652494	0.116	0.15	1	8
Rad52	0.318772	-0.652407	0.051	0.032	1	8
Isyna1	0.247151	-0.652126	0.07	0.101	1	8
Enthd1	0.494919	-0.651757	0.019	0.028	1	8
Ift57	0.747121	-0.651729	0.112	0.121	1	8
Mfsd5	0.344866	-0.651708	0.14	0.17	1	8
Mfsd11	0.954941	-0.651334	0.112	0.109	1	8
Bex6	0.318869	-0.651173	0.037	0.057	1	8
Kpna3	0.542995	-0.64966	0.242	0.255	1	8
Mmp28	0.839513	-0.649488	0.019	0.016	1	8
B3galt6	0.818508	-0.649366	0.028	0.024	1	8
Ptgfrn	0.603461	-0.648734	0.014	0.02	1	8
Psmd9	0.500116	-0.648461	0.172	0.186	1	8
Rad18	0.094797	-0.648119	0.06	0.105	1	8
Tagap1	0.839513	-0.647644	0.019	0.016	1	8
Dctn3	0.242563	-0.647495	0.428	0.457	1	8
Vps37c	0.557874	-0.647455	0.112	0.13	1	8
Csad	0.795327	-0.647047	0.107	0.113	1	8
Retreg3	0.795772	-0.646961	0.2	0.186	1	8
Cd320	0.292269	-0.646846	0.014	0.028	1	8
Cdyl	0.116951	-0.646779	0.288	0.34	1	8
Gtpbp4	0.2787	-0.646726	0.247	0.283	1	8
3300002I08Rik	0.469668	-0.646691	0.07	0.053	1	8
Cbx5	0.216601	-0.646501	0.093	0.13	1	8
Coa7	0.812549	-0.646452	0.056	0.061	1	8
Abhd8	0.24617	-0.646176	0.047	0.073	1	8
Zfp160	0.321023	-0.646154	0.102	0.13	1	8
Tlr6	0.496075	-0.646122	0.047	0.061	1	8
Mbip	0.990316	-0.645894	0.126	0.126	1	8
Bod1l	0.185016	-0.64545	0.288	0.348	1	8
Ints4	0.909077	-0.64522	0.074	0.077	1	8
Sf3a3	0.290153	-0.644804	0.144	0.182	1	8
Tusc2	0.164894	-0.644737	0.051	0.085	1	8
Mppe1	0.719052	-0.64471	0.163	0.174	1	8
Map3k1	0.131929	-0.64461	0.419	0.47	1	8
Lyrm4	0.225533	-0.644519	0.107	0.146	1	8
Ncbp2	0.198622	-0.64437	0.158	0.202	1	8
Pcmtd2	0.559672	-0.643976	0.135	0.113	1	8
Rraga	0.339858	-0.643941	0.228	0.259	1	8
Zc2hc1a	0.484866	-0.643175	0.047	0.061	1	8
Rfk	0.869856	-0.643027	0.126	0.13	1	8
Osbpl3	0.296562	-0.642863	0.181	0.215	1	8
Vrk3	0.342863	-0.642697	0.14	0.174	1	8
Ddx41	0.304744	-0.642565	0.163	0.198	1	8
Lck	0.341394	-0.642539	0.13	0.158	1	8
Pld2	0.745736	-0.642524	0.056	0.049	1	8
D2hgdh	0.481531	-0.642384	0.047	0.061	1	8
[truncated: 7,588 more rows]
