# Supplementary material for: Interferon-α and -β subtypes have temporally distinct roles in containing viral spread and protecting vital organs
Source: Research Square preprint supplement (doi:10.21203/rs.3.rs-9077466/v1), 2026-04-08
Supplement: Supplementary file 2 [file 5670ca48307ab6111c60c8f0.xlsx]

## Sheet: WT ECTV vs Ifnar1 ECTV clu2-NK
	p_val	avg_log2FC	pct.1	pct.2	p_val_adj	cluster		high in WT ECTV 1 dpi (-)	high in Ifnar1 ko ECTV 1 dpi (+)
Ifi27l2a	5.01637e-11	-7.13469	0	0.078	8.30209e-07	2
Oas1a	1.23304e-06	-5.49797	0	0.044	0.0204068	2
Ifitm3	0.00553153	-4.43435	0	0.015	1	2
Ifi44	0.0150753	-4.40864	0	0.011	1	2
Ifit1	0.0107679	-4.32227	0	0.012	1	2
Garin4	0.0107679	-4.21864	0	0.012	1	2
Nbea	2.72461e-30	-3.88021	0.023	0.261	4.50923e-26	2
Zfp41	0.0107679	-3.72192	0	0.012	1	2
Oasl1	0.00148227	-3.70586	0.002	0.023	1	2
Phldb1	0.0211681	-3.67956	0	0.01	1	2
Dnase1l2	0.0211681	-3.6736	0	0.01	1	2
Lpar5	0.00553153	-3.62059	0	0.015	1	2
Pate2	0.0150753	-3.5439	0	0.011	1	2
Ifi204	0.000262819	-3.50706	0.004	0.034	1	2
Nfam1	0.0150753	-3.49937	0	0.011	1	2
Bbs7	0.0150753	-3.4819	0	0.011	1	2
Mc1r	0.0150753	-3.47056	0	0.011	1	2
Ifit3	0.00171875	-3.38691	0.004	0.027	1	2
Rtp4	3.33678e-08	-3.27916	0.006	0.069	0.000552238	2
Mx1	0.00050147	-3.2767	0.004	0.031	1	2
Slc29a2	0.0211681	-3.25224	0	0.01	1	2
Gpam	0.000299715	-3.24458	0.002	0.029	1	2
H2ac7	0.0277585	-3.24418	0.002	0.013	1	2
Ccdc40	0.0150753	-3.14673	0	0.011	1	2
Usp18	1.79096e-06	-3.08423	0.01	0.063	0.0296404	2
Cntn1	0.038872	-2.99049	0.002	0.012	1	2
Iigp1	0.0404747	-2.94405	0.004	0.016	1	2
H2bc14	0.0539845	-2.86188	0.002	0.011	1	2
Cdc42ep1	0.0539845	-2.74704	0.002	0.011	1	2
Myom1	0.0543156	-2.72604	0.002	0.011	1	2
Rec8	0.0542051	-2.70814	0.002	0.011	1	2
Gdf11	0.00453221	-2.69762	0.004	0.023	1	2
Kcng3	0.075612	-2.6859	0.002	0.01	1	2
Zfp72	0.075612	-2.62998	0.002	0.01	1	2
Ifitm2	0.0398485	-2.56224	0.006	0.019	1	2
Cfap45	0.192008	-2.43973	0.004	0.01	1	2
Oasl2	0.0105479	-2.4279	0.002	0.017	1	2
Pram1	0.0117156	-2.39232	0.004	0.02	1	2
Nphp4	0.0540947	-2.34881	0.002	0.011	1	2
Cox6b2	0.0754597	-2.34535	0.002	0.01	1	2
Fgfbp3	0.0387123	-2.28875	0.002	0.012	1	2
Gbp6	0.0556913	-2.26418	0.004	0.015	1	2
Nrxn3	0.0756499	-2.26114	0.004	0.013	1	2
Oas3	0.0117594	-2.25354	0.004	0.02	1	2
Epas1	0.00894513	-2.22126	0.006	0.025	1	2
Tlr7	0.038952	-2.20891	0.002	0.012	1	2
Rsad2	0.0759174	-2.16101	0.002	0.01	1	2
Zfp972	0.0757791	-2.15259	0.004	0.013	1	2
Hemk1	0.166489	-2.1418	0.006	0.013	1	2
Ldhb	0.0759174	-2.13551	0.002	0.01	1	2
Ly6a	0.00620822	-2.13302	0.01	0.032	1	2
Ifi27	4.63582e-24	-2.12581	0.093	0.327	7.67228e-20	2
Myo1h	0.0542051	-2.10779	0.002	0.011	1	2
Rapgef4	0.0066267	-2.09959	0.006	0.026	1	2
Dynlt1b	0.000255567	-2.08579	0.011	0.048	1	2
Impg2	0.038952	-2.08206	0.002	0.012	1	2
Frmd5	0.0813154	-2.07875	0.011	0.025	1	2
Tubb6	0.0365847	-2.07603	0.008	0.022	1	2
Bcl2l15	0.0759174	-2.07415	0.002	0.01	1	2
Isg20	0.0482795	-2.06876	0.011	0.027	1	2
Atp6v0a1	0.110353	-2.02969	0.008	0.018	1	2
Gm49496	0.10373	-1.96927	0.004	0.012	1	2
Morn3	0.0222151	-1.94782	0.011	0.03	1	2
Ddx60	9.79452e-05	-1.93146	0.027	0.076	1	2
Ntm	0.0391929	-1.92648	0.002	0.012	1	2
Adgrv1	0.0297577	-1.91578	0.006	0.02	1	2
Msl3l2	0.0429757	-1.9109	0.01	0.025	1	2
Hcar2	0.192912	-1.90546	0.004	0.01	1	2
Cd86	0.0329249	-1.90494	0.01	0.026	1	2
Gpr15	0.0165515	-1.89997	0.006	0.022	1	2
Zfp7	0.0192841	-1.88407	0.01	0.028	1	2
Gfra1	0.0765312	-1.87522	0.002	0.01	1	2
Rab3a	0.0531875	-1.87227	0.006	0.018	1	2
Ccnb1ip1	0.0109154	-1.86607	0.01	0.03	1	2
Fam72a	0.0546484	-1.86582	0.002	0.011	1	2
Cxcl10	0.000897865	-1.86446	0.063	0.114	1	2
Dzip1	0.0639429	-1.8622	0.008	0.02	1	2
Tctn1	0.104076	-1.85762	0.004	0.012	1	2
Pik3r6	0.0762975	-1.85366	0.004	0.013	1	2
Il18bp	0.192008	-1.83224	0.004	0.01	1	2
Tiam1	0.00898406	-1.81853	0.008	0.028	1	2
Tns1	0.0564709	-1.81581	0.004	0.015	1	2
Bard1	0.0277307	-1.80346	0.008	0.023	1	2
Rasgef1a	0.0152459	-1.80342	0.017	0.04	1	2
Abca5	0.110794	-1.80135	0.008	0.018	1	2
Ifi213	2.584e-06	-1.80035	0.048	0.122	0.0427653	2
Pard3b	0.0209765	-1.79338	0.008	0.025	1	2
Lipo3	0.10477	-1.79326	0.004	0.012	1	2
Angpt2	0.0772118	-1.78779	0.004	0.013	1	2
Slfn5	0.0456553	-1.78635	0.021	0.04	1	2
Gas2l3	0.0765312	-1.78035	0.002	0.01	1	2
Fahd1	0.0715092	-1.78014	0.006	0.017	1	2
Phf11c	0.0256957	-1.771	0.01	0.027	1	2
Fbxl9	0.0949527	-1.77064	0.01	0.021	1	2
Aspm	0.0282812	-1.76339	0.002	0.013	1	2
Gm29394	0.0401667	-1.75502	0.006	0.019	1	2
Atg4c	0.142265	-1.75428	0.004	0.011	1	2
Ficd	0.0546484	-1.73639	0.002	0.011	1	2
Glis2	0.143208	-1.7356	0.008	0.017	1	2
Ifit1bl2	0.0546484	-1.73132	0.002	0.011	1	2
Spaca6	0.127075	-1.72996	0.006	0.015	1	2
Gsn	0.0377269	-1.72825	0.011	0.028	1	2
Proca1	0.0841511	-1.72735	0.008	0.019	1	2
Zcwpw2	0.0718364	-1.72611	0.006	0.017	1	2
Nme2	1.02984e-07	-1.70417	0.051	0.141	0.00170439	2
Snapc4	0.0885883	-1.69701	0.013	0.027	1	2
Prrg1	0.311468	-1.69356	0.008	0.013	1	2
Ptk2	0.142495	-1.69202	0.004	0.011	1	2
Scart2	0.327914	-1.69153	0.01	0.016	1	2
Zdhhc23	0.110647	-1.67719	0.008	0.018	1	2
Cmpk2	0.0282812	-1.66734	0.002	0.013	1	2
Nme4	0.0545373	-1.66626	0.002	0.011	1	2
Sema3c	0.0578079	-1.66408	0.01	0.023	1	2
Pxmp2	0.0949527	-1.6467	0.01	0.021	1	2
C130026I21Rik	0.0401029	-1.64481	0.006	0.019	1	2
BC025920	0.187615	-1.64065	0.008	0.016	1	2
Adat1	0.015283	-1.63192	0.017	0.04	1	2
Gm14410	0.0763774	-1.63028	0.002	0.01	1	2
Nek4	0.169057	-1.62583	0.006	0.013	1	2
Src	0.0766853	-1.60711	0.002	0.01	1	2
Atl1	0.142495	-1.60704	0.004	0.011	1	2
Irgm2	0.00106593	-1.60413	0.032	0.074	1	2
Klhl26	0.0476555	-1.60324	0.025	0.045	1	2
Irag1	0.399174	-1.60126	0.008	0.012	1	2
Nnat	0.213762	-1.60118	0.011	0.02	1	2
Kirrel3	0.19382	-1.59934	0.004	0.01	1	2
Atp5o	0.00602815	-1.59152	0.011	0.036	1	2
9430015G10Rik	0.0180154	-1.5914	0.015	0.037	1	2
Tctn3	0.0957879	-1.59117	0.01	0.021	1	2
Spon1	0.0960289	-1.58971	0.006	0.016	1	2
Clspn	0.0204005	-1.5887	0.002	0.015	1	2
Lmln	0.142035	-1.58052	0.004	0.011	1	2
Ccdc18	0.142495	-1.57582	0.004	0.011	1	2
Dlg3	0.064575	-1.57562	0.008	0.02	1	2
Dnaaf2	0.104944	-1.57538	0.004	0.012	1	2
Lipt1	0.0547597	-1.56222	0.002	0.011	1	2
Cln6	0.122935	-1.55693	0.01	0.02	1	2
Acrbp	0.0123395	-1.5549	0.008	0.027	1	2
Ranbp3l	0.0763774	-1.54944	0.002	0.01	1	2
Itga3	0.293284	-1.53451	0.006	0.011	1	2
Ccdc17	0.396637	-1.53378	0.008	0.012	1	2
Specc1	0.00844389	-1.53351	0.015	0.04	1	2
Col23a1	0.762756	-1.52961	0.01	0.011	1	2
Cabyr	0.00853192	-1.52898	0.01	0.031	1	2
Lonrf1	0.0958868	-1.5256	0.006	0.016	1	2
Upp1	0.0549829	-1.51248	0.002	0.011	1	2
Sh3d21	0.399174	-1.48917	0.008	0.012	1	2
Edaradd	0.293284	-1.48223	0.006	0.011	1	2
Slc15a3	0.0574279	-1.47643	0.01	0.023	1	2
Spock2	0.0417103	-1.47608	0.004	0.016	1	2
2510009E07Rik	0.634889	-1.47363	0.008	0.01	1	2
Tepsin	0.0898853	-1.46443	0.013	0.027	1	2
6430550D23Rik	0.0137712	-1.4554	0.011	0.032	1	2
Ptpn21	0.0338965	-1.4549	0.01	0.026	1	2
Xk	0.0721649	-1.4531	0.006	0.017	1	2
Mt1	0.000946963	-1.44376	0.015	0.049	1	2
Zranb3	0.0578079	-1.44002	0.01	0.023	1	2
Ifitm1	0.649141	-1.43956	0.015	0.012	1	2
Pter	0.21332	-1.43909	0.011	0.02	1	2
Rasa4	0.050269	-1.43255	0.011	0.027	1	2
Nanos3	0.212437	-1.42586	0.011	0.02	1	2
Rcan1	0.043718	-1.42498	0.013	0.03	1	2
Slc35g1	0.0388142	-1.41808	0.011	0.028	1	2
Jmjd8	0.124883	-1.41328	0.01	0.02	1	2
Prss2	0.28252	-1.41102	0.023	0.032	1	2
Gcfc2	0.0104985	-1.40913	0.019	0.045	1	2
Adrb1	0.0305385	-1.40854	0.006	0.02	1	2
Fam114a1	0.505332	-1.4076	0.01	0.013	1	2
Ociad2	0.1163	-1.40498	0.013	0.026	1	2
Chst15	0.291793	-1.40308	0.006	0.011	1	2
Pygm	0.0772118	-1.40142	0.004	0.013	1	2
Spata24	0.0304651	-1.39392	0.011	0.029	1	2
Fancb	0.143187	-1.39294	0.004	0.011	1	2
Inafm2	0.0108017	-1.38967	0.011	0.034	1	2
Ptpn14	0.169527	-1.38826	0.006	0.013	1	2
Zfp39	0.0709083	-1.37485	0.013	0.028	1	2
Areg	0.608669	-1.36621	0.013	0.017	1	2
Arid3a	0.065121	-1.36014	0.008	0.02	1	2
Myo5a	0.0383009	-1.35789	0.015	0.034	1	2
Ttl	0.18971	-1.35507	0.008	0.016	1	2
Atp1a3	0.160059	-1.35488	0.01	0.019	1	2
Rftn2	0.189243	-1.35112	0.008	0.016	1	2
Nlrc4	0.0572596	-1.35073	0.004	0.015	1	2
Ropn1l	0.293658	-1.3479	0.006	0.011	1	2
Ttn	0.0321985	-1.3476	0.029	0.053	1	2
Il17c	0.128913	-1.34548	0.006	0.015	1	2
Qser1	0.026943	-1.34245	0.025	0.048	1	2
Nacc2	0.258194	-1.34189	0.01	0.017	1	2
Hdac6	0.146366	-1.34172	0.008	0.017	1	2
Pxdc1	0.160619	-1.34123	0.01	0.019	1	2
Gm2237	0.142725	-1.33847	0.004	0.011	1	2
Tbc1d19	0.189243	-1.33614	0.008	0.016	1	2
Plpp2	0.123382	-1.33381	0.01	0.02	1	2
Ndst2	0.0561757	-1.32431	0.013	0.029	1	2
Ctbs	0.00334458	-1.31268	0.023	0.056	1	2
Lrsam1	0.295155	-1.31049	0.006	0.011	1	2
Gpr141	0.0766853	-1.30794	0.002	0.01	1	2
Fcsk	0.0856596	-1.30621	0.008	0.019	1	2
Fbxo24	0.123981	-1.30078	0.01	0.02	1	2
Rflnb	0.00861341	-1.29824	0.019	0.046	1	2
Ralgps2	0.168969	-1.2945	0.011	0.021	1	2
Gata6	0.144114	-1.28867	0.004	0.011	1	2
Eif2ak2	0.00013515	-1.28842	0.038	0.092	1	2
Cenpu	0.111827	-1.28811	0.008	0.018	1	2
H2-T24	0.0398768	-1.2789	0.011	0.028	1	2
Spata6l	0.0709898	-1.27788	0.013	0.028	1	2
Arhgap27	0.00242829	-1.27501	0.032	0.07	1	2
Eme2	0.169998	-1.27439	0.006	0.013	1	2
Meig1	0.0782415	-1.26707	0.015	0.03	1	2
Nox1	0.135785	-1.26259	0.011	0.022	1	2
Prune2	0.295155	-1.26254	0.006	0.011	1	2
Prdm9	0.169762	-1.26231	0.006	0.013	1	2
Xlr5a	0.026189	-1.2603	0.017	0.038	1	2
Nap1l3	0.146366	-1.25743	0.008	0.017	1	2
Ube2e2	0.172647	-1.25592	0.011	0.021	1	2
Slc16a3	0.406741	-1.25471	0.01	0.015	1	2
Csf1	0.624312	-1.2545	0.01	0.012	1	2
Zfp850	0.106098	-1.25315	0.011	0.023	1	2
Pvr	0.0333544	-1.2511	0.017	0.037	1	2
Pnp2	0.128913	-1.24995	0.006	0.015	1	2
Nxpe3	0.0194503	-1.2495	0.029	0.055	1	2
Cd24a	0.296282	-1.24921	0.006	0.011	1	2
Mcrip2	0.183313	-1.24732	0.015	0.026	1	2
Usp40	0.0184119	-1.24643	0.036	0.065	1	2
Asb2	0.108838	-1.23662	0.021	0.036	1	2
Suv39h2	0.259858	-1.23365	0.01	0.017	1	2
Zfp235	0.125185	-1.22723	0.01	0.02	1	2
Phldb2	0.170234	-1.22656	0.006	0.013	1	2
Tomt	0.0554349	-1.22373	0.019	0.037	1	2
Il4i1	0.410274	-1.21917	0.01	0.015	1	2
Hsd17b7	0.275356	-1.21751	0.013	0.021	1	2
Zfp239	0.0776063	-1.20664	0.004	0.013	1	2
Ybey	0.0826087	-1.2031	0.017	0.032	1	2
Slc38a7	0.042141	-1.20298	0.017	0.036	1	2
Ric3	0.105819	-1.19887	0.004	0.012	1	2
Garin1a	0.105643	-1.19608	0.004	0.012	1	2
Plpp1	0.399598	-1.19559	0.008	0.012	1	2
Ankrd6	0.317114	-1.19216	0.008	0.013	1	2
Acsf3	0.135331	-1.19171	0.011	0.022	1	2
Bst2	1.10896e-06	-1.18627	0.141	0.245	0.0183533	2
Tedc1	0.0776063	-1.18465	0.004	0.013	1	2
Ptprk	0.0350886	-1.18231	0.013	0.031	1	2
H3c4	0.0973156	-1.18116	0.006	0.016	1	2
Spi1	0.295531	-1.18111	0.006	0.011	1	2
Thop1	0.219499	-1.17452	0.013	0.022	1	2
St6galnac6	0.151409	-1.17344	0.015	0.027	1	2
Ifit2	0.0591625	-1.17117	0.019	0.037	1	2
Fbxl22	0.244054	-1.17088	0.008	0.015	1	2
Impg1	0.136392	-1.16908	0.011	0.022	1	2
Smim35	0.071727	-1.16874	0.013	0.028	1	2
Slc39a11	0.0742217	-1.16627	0.036	0.057	1	2
Zfp846	0.102262	-1.16519	0.017	0.031	1	2
Egln3	0.0985189	-1.16446	0.015	0.029	1	2
Kifc5b	0.230761	-1.16358	0.015	0.025	1	2
Sema4b	0.0868306	-1.16355	0.019	0.035	1	2
Btk	0.19473	-1.1618	0.004	0.01	1	2
Rubcnl	0.0493495	-1.16125	0.008	0.021	1	2
Helq	0.113166	-1.16006	0.008	0.018	1	2
Vav2	0.0275092	-1.15884	0.013	0.032	1	2
Chml	0.170706	-1.15874	0.006	0.013	1	2
Bivm	0.295155	-1.15731	0.006	0.011	1	2
Zfp12	0.0983288	-1.15664	0.01	0.021	1	2
Dlg4	0.05911	-1.15045	0.021	0.039	1	2
Hpgds	0.0190294	-1.14769	0.015	0.037	1	2
H2ac15	0.106346	-1.14755	0.004	0.012	1	2
Lgals3bp	2.56577e-07	-1.14558	0.103	0.208	0.00424635	2
Spink13	0.109827	-1.14513	0.011	0.023	1	2
Tacstd2	0.386548	-1.14385	0.006	0.01	1	2
Cdk1	0.194426	-1.14357	0.004	0.01	1	2
Dach2	0.416615	-1.14317	0.017	0.023	1	2
Rmi2	0.279073	-1.13871	0.015	0.023	1	2
P3h1	0.19473	-1.13801	0.004	0.01	1	2
Zbtb34	0.598596	-1.13738	0.015	0.019	1	2
Jaml	0.0055164	-1.13152	0.046	0.084	1	2
Dbn1	0.0963137	-1.12989	0.006	0.016	1	2
Sgsm3	0.416665	-1.12772	0.011	0.017	1	2
Sh3tc1	0.506642	-1.12615	0.011	0.016	1	2
Mlkl	0.114805	-1.12345	0.013	0.026	1	2
Msantd2	0.000355383	-1.12331	0.11	0.176	1	2
Zscan20	0.314989	-1.1222	0.008	0.013	1	2
Cacna1c	0.144346	-1.12108	0.004	0.011	1	2
Lins1	0.0759861	-1.1189	0.015	0.03	1	2
Phf11a	0.129542	-1.11756	0.019	0.032	1	2
Zfp580	0.295531	-1.1098	0.006	0.011	1	2
Gm3435	0.172832	-1.10915	0.011	0.021	1	2
Plac8	0.0380641	-1.1076	0.067	0.097	1	2
Xaf1	0.000258122	-1.10744	0.084	0.148	1	2
H2ac6	0.0075198	-1.10392	0.036	0.07	1	2
Vmn2r84	0.327248	-1.09907	0.01	0.016	1	2
Trim25	0.000146376	-1.0987	0.051	0.11	1	2
B3gat2	0.105294	-1.09741	0.004	0.012	1	2
Gpt	0.0400306	-1.09574	0.011	0.028	1	2
Osgin1	0.0768668	-1.09489	0.01	0.022	1	2
Mxi1	0.00274499	-1.08976	0.059	0.105	1	2
Cand2	0.170706	-1.08922	0.006	0.013	1	2
Hgh1	0.12086	-1.08708	0.015	0.028	1	2
Efcab11	0.226352	-1.08626	0.006	0.012	1	2
Nrp1	0.205467	-1.08189	0.01	0.018	1	2
Blk	0.29478	-1.08104	0.006	0.011	1	2
Kif27	0.129098	-1.08053	0.006	0.015	1	2
2310022A10Rik	0.160652	-1.07654	0.027	0.04	1	2
Rabl3	0.097901	-1.07563	0.015	0.029	1	2
Plcd3	0.0786538	-1.07446	0.023	0.04	1	2
Tgtp2	0.130962	-1.07278	0.021	0.035	1	2
Wdr59	0.188944	-1.0709	0.017	0.028	1	2
Fam110b	0.633152	-1.06997	0.008	0.01	1	2
H2-T10	0.000231119	-1.0697	0.05	0.106	1	2
Star	0.385621	-1.06903	0.006	0.01	1	2
Zfp300	0.260971	-1.06863	0.01	0.017	1	2
Garnl3	0.146366	-1.06732	0.008	0.017	1	2
Plin3	0.131652	-1.06504	0.019	0.032	1	2
Zscan25	0.120246	-1.06484	0.015	0.028	1	2
Sema4c	0.161839	-1.06401	0.019	0.031	1	2
Lysmd2	0.0103039	-1.06241	0.021	0.048	1	2
Trim56	0.00397258	-1.06233	0.078	0.125	1	2
Lpcat1	0.137307	-1.06204	0.011	0.022	1	2
Teddm2	0.295906	-1.06108	0.006	0.011	1	2
Fhod1	0.0764935	-1.06104	0.023	0.04	1	2
Jchain	0.223656	-1.06063	0.006	0.012	1	2
Irf9	9.28408e-05	-1.06025	0.059	0.123	1	2
Slc16a6	0.00269749	-1.05971	0.091	0.141	1	2
Mical2	0.0583282	-1.05756	0.013	0.029	1	2
Slpi	0.412262	-1.05647	0.011	0.017	1	2
Gatc	0.022744	-1.05534	0.006	0.021	1	2
Tlr1	0.294032	-1.0547	0.006	0.011	1	2
Lyrm7	0.207311	-1.05401	0.01	0.018	1	2
Dynlt1c	0.0915025	-1.05268	0.013	0.027	1	2
Nusap1	0.837285	-1.05187	0.013	0.015	1	2
Btbd2	0.311078	-1.04736	0.032	0.043	1	2
Dhrs9	0.105819	-1.04336	0.004	0.012	1	2
Zfp322a	0.0036099	-1.04151	0.084	0.131	1	2
Pigw	0.171417	-1.03702	0.006	0.013	1	2
Ccdc34	0.051604	-1.03575	0.036	0.059	1	2
Zdhhc1	0.170943	-1.03567	0.006	0.013	1	2
Sec14l1	0.296734	-1.03525	0.048	0.059	1	2
Slc25a47	0.223954	-1.03101	0.006	0.012	1	2
Thrb	0.173023	-1.02656	0.027	0.04	1	2
Kctd12b	0.272691	-1.02652	0.011	0.019	1	2
Abhd6	0.0806472	-1.02649	0.027	0.045	1	2
Gm20537	0.0507852	-1.02511	0.008	0.021	1	2
Ifi214	0.0122086	-1.02506	0.05	0.084	1	2
Slc46a3	0.196869	-1.02315	0.023	0.035	1	2
Dynlt1a	0.116651	-1.0178	0.023	0.038	1	2
Kcnj13	0.63431	-1.01753	0.008	0.01	1	2
Cxcr5	0.478768	-1.01691	0.019	0.025	1	2
Actn1	0.0739377	-1.01628	0.029	0.048	1	2
Zfp704	0.142519	-1.01596	0.013	0.025	1	2
Nckap5	0.261808	-1.01397	0.01	0.017	1	2
Stx2	0.0726721	-1.01157	0.034	0.055	1	2
Tmem81	0.296658	-1.01139	0.006	0.011	1	2
Xkr8	0.385158	-1.01017	0.006	0.01	1	2
Cdca8	0.295155	-1.00993	0.006	0.011	1	2
Garem1	0.623274	-1.00768	0.01	0.012	1	2
Slc4a4	0.510809	-1.00737	0.01	0.013	1	2
Cyp2r1	0.413429	-1.00544	0.01	0.015	1	2
H2ac13	0.0307276	-1.00344	0.027	0.05	1	2
Fancg	0.259858	-1.00325	0.01	0.017	1	2
Cd80	0.29478	-0.998158	0.006	0.011	1	2
Ehbp1	0.0509302	-0.997503	0.036	0.059	1	2
Ankrd50	0.00362334	-0.996209	0.059	0.103	1	2
Tnfrsf4	0.633731	-0.994677	0.008	0.01	1	2
Ralb	0.342421	-0.992172	0.015	0.022	1	2
Bcs1l	0.0681377	-0.990098	0.027	0.046	1	2
Tulp4	2.18722e-11	-0.987307	0.288	0.449	3.61984e-07	2
Dcun1d4	0.282314	-0.986744	0.027	0.037	1	2
Kat2a	0.529669	-0.984143	0.023	0.028	1	2
Taf9b	0.0475424	-0.983522	0.029	0.05	1	2
Rnf213	1.7028e-05	-0.982492	0.131	0.216	0.281813	2
H2bc18	0.0626624	-0.982265	0.042	0.065	1	2
Mtus2	0.328581	-0.980353	0.01	0.016	1	2
Pdp2	0.0726366	-0.979449	0.013	0.028	1	2
Klra5	0.280472	-0.978595	0.013	0.021	1	2
Adgrb2	0.122968	-0.976911	0.015	0.028	1	2
Paxip1	0.0255295	-0.975208	0.044	0.073	1	2
Plxdc1	0.319961	-0.974715	0.008	0.013	1	2
Dnal1	0.769116	-0.972536	0.01	0.011	1	2
Mypop	0.0979376	-0.971085	0.025	0.041	1	2
Ggcx	0.475857	-0.970465	0.019	0.025	1	2
Shfl	0.17223	-0.969739	0.027	0.04	1	2
Mgst3	0.152453	-0.968646	0.015	0.027	1	2
Zfp397	0.0115275	-0.967306	0.069	0.107	1	2
Camta2	0.0134529	-0.966562	0.046	0.079	1	2
Pla2g4a	0.129098	-0.966217	0.006	0.015	1	2
Slc25a13	0.469728	-0.965973	0.021	0.027	1	2
Erlin1	0.259302	-0.965155	0.01	0.017	1	2
Clec4e	0.400871	-0.964343	0.008	0.012	1	2
Ift88	0.228133	-0.961517	0.013	0.022	1	2
Dhx58	0.108698	-0.961421	0.011	0.023	1	2
Mboat2	0.616994	-0.961396	0.011	0.015	1	2
Slc39a9	0.0150905	-0.96135	0.042	0.073	1	2
Acad12	0.206387	-0.959485	0.01	0.018	1	2
Or13a27	0.171654	-0.95867	0.006	0.013	1	2
Zc3h7b	0.0458203	-0.958275	0.046	0.072	1	2
Isg15	0.00428349	-0.956811	0.074	0.121	1	2
Inka2	0.385621	-0.952702	0.006	0.01	1	2
Sh3bp4	0.261529	-0.949122	0.01	0.017	1	2
Bcl9	0.23179	-0.948568	0.017	0.027	1	2
Slc5a11	0.385158	-0.947809	0.006	0.01	1	2
Gm20708	0.245787	-0.947656	0.008	0.015	1	2
Agfg2	0.00921464	-0.946214	0.029	0.059	1	2
Map3k15	0.0736023	-0.944023	0.006	0.017	1	2
Shc4	0.634889	-0.942505	0.008	0.01	1	2
Fam184b	0.107681	-0.94244	0.017	0.031	1	2
Hid1	0.0797063	-0.942272	0.025	0.043	1	2
H2bc24	0.0477573	-0.941652	0.021	0.04	1	2
Ints2	0.0587086	-0.941527	0.03	0.051	1	2
Gm17655	0.0181287	-0.938702	0.023	0.048	1	2
Spsb1	0.409371	-0.937746	0.015	0.021	1	2
Plod1	0.0902037	-0.936726	0.019	0.035	1	2
Tspyl3	0.195157	-0.936225	0.017	0.028	1	2
Phaf1	0.0521451	-0.936001	0.046	0.07	1	2
Serpinb9b	0.183106	-0.935723	0.065	0.083	1	2
Cenpe	0.171892	-0.935183	0.006	0.013	1	2
Optn	0.0239257	-0.933752	0.025	0.049	1	2
Kif13a	0.177518	-0.933442	0.011	0.021	1	2
Arhgef28	0.389805	-0.933174	0.006	0.01	1	2
Pdgfa	0.143882	-0.932176	0.004	0.011	1	2
Dnmt3b	0.0573739	-0.930985	0.029	0.049	1	2
Tmem69	0.284211	-0.930462	0.017	0.026	1	2
BC024978	0.109701	-0.927882	0.011	0.023	1	2
Ankrd33b	0.419489	-0.927876	0.019	0.013	1	2
Rpap1	0.204782	-0.926779	0.034	0.048	1	2
P2rx3	0.633152	-0.923977	0.008	0.01	1	2
Klhl17	0.402146	-0.922175	0.008	0.012	1	2
Atrnl1	0.145913	-0.921124	0.034	0.05	1	2
Slfn8	0.000437631	-0.919446	0.091	0.155	1	2
Scg5	0.407525	-0.919012	0.01	0.015	1	2
Klhl8	0.0864091	-0.918723	0.04	0.06	1	2
Zdhhc2	0.340561	-0.917626	0.017	0.025	1	2
Prickle1	0.234611	-0.917594	0.017	0.027	1	2
Patl2	0.00845977	-0.915841	0.032	0.065	1	2
Ggt5	0.342421	-0.915018	0.015	0.022	1	2
Fktn	0.330613	-0.914742	0.027	0.036	1	2
Ctbp2	0.275092	-0.91373	0.03	0.041	1	2
Castor2	0.472802	-0.910179	0.021	0.027	1	2
Dusp4	0.496484	-0.908236	0.013	0.018	1	2
Igtp	0.0552851	-0.907768	0.042	0.066	1	2
Poll	0.336428	-0.906513	0.011	0.018	1	2
Cbr4	0.651614	-0.906011	0.019	0.022	1	2
Atp6v1g2	0.0539212	-0.904976	0.017	0.035	1	2
Trim30d	0.00339481	-0.903102	0.067	0.113	1	2
Gpr34	0.0409389	-0.900025	0.017	0.036	1	2
Wdr6	0.194135	-0.899791	0.036	0.05	1	2
Rab4a	0.000482079	-0.899533	0.046	0.097	1	2
Gm49339	0.192294	-0.897194	0.008	0.016	1	2
Jazf1	0.124933	-0.897174	0.042	0.06	1	2
Bbs2	0.124599	-0.896962	0.015	0.028	1	2
Pawr	0.235191	-0.896724	0.015	0.025	1	2
Zfp770	0.0723534	-0.896012	0.019	0.036	1	2
Slc43a2	0.0117817	-0.893308	0.082	0.124	1	2
Ptp4a1	0.0195741	-0.892446	0.065	0.1	1	2
Ttll12	0.182297	-0.892239	0.013	0.023	1	2
Pkd1	0.101492	-0.891524	0.032	0.05	1	2
Slc45a4	0.0342445	-0.889736	0.046	0.074	1	2
Flvcr1	0.124976	-0.889316	0.038	0.056	1	2
Pkd2	0.259858	-0.889075	0.01	0.017	1	2
Zfp992	0.0889866	-0.887893	0.032	0.051	1	2
Zkscan8	0.0656673	-0.885502	0.011	0.026	1	2
Fam169b	0.26786	-0.885378	0.036	0.048	1	2
Ccnj	0.170782	-0.883732	0.027	0.04	1	2
Zcchc4	0.290171	-0.883466	0.044	0.056	1	2
Bcar1	0.91231	-0.881582	0.01	0.01	1	2
Wscd2	0.0864817	-0.881065	0.038	0.058	1	2
Plekha4	0.0293962	-0.878525	0.025	0.048	1	2
Srsf12	0.0989417	-0.877745	0.01	0.021	1	2
C1qtnf12	0.919151	-0.87667	0.01	0.01	1	2
Filip1	0.148181	-0.876506	0.03	0.046	1	2
Ildr1	0.114518	-0.87638	0.008	0.018	1	2
Dpf3	0.418139	-0.874429	0.011	0.017	1	2
Tchp	0.059406	-0.874403	0.019	0.037	1	2
Btbd6	0.281757	-0.873892	0.015	0.023	1	2
Wdpcp	0.119136	-0.873651	0.027	0.043	1	2
Lss	0.508067	-0.872573	0.01	0.013	1	2
Smpd4	0.0993231	-0.870922	0.027	0.044	1	2
Cd83	0.00648887	-0.87001	0.118	0.168	1	2
Slx1b	0.238076	-0.869764	0.03	0.043	1	2
Ap4m1	0.139848	-0.86763	0.023	0.037	1	2
Cdc7	0.174695	-0.866971	0.011	0.021	1	2
Zdhhc24	0.0429036	-0.866789	0.034	0.058	1	2
Paqr5	0.115731	-0.864567	0.008	0.018	1	2
Cchcr1	0.108448	-0.864189	0.011	0.023	1	2
Tmprss6	0.0766737	-0.863708	0.04	0.062	1	2
1700017B05Rik	0.670186	-0.862941	0.027	0.03	1	2
Haghl	0.18832	-0.862915	0.042	0.057	1	2
Dll1	0.226051	-0.861305	0.006	0.012	1	2
Nek3	0.204339	-0.860217	0.023	0.035	1	2
Cep72	0.412639	-0.859035	0.01	0.015	1	2
Sfmbt2	0.316404	-0.858755	0.008	0.013	1	2
Arfip2	0.0523389	-0.85713	0.04	0.064	1	2
Fbxo10	0.415194	-0.85576	0.011	0.017	1	2
Septin8	0.0987613	-0.851712	0.006	0.016	1	2
2310057M21Rik	0.242076	-0.851094	0.025	0.036	1	2
Frmd4a	0.0364719	-0.849019	0.036	0.062	1	2
Dscam	0.000563283	-0.847963	0.16	0.234	1	2
Uevld	0.236844	-0.8471	0.017	0.027	1	2
Zbtb40	0.103369	-0.846485	0.05	0.07	1	2
Mlf1	0.122438	-0.845776	0.029	0.045	1	2
Gpat3	0.0383854	-0.84533	0.04	0.066	1	2
Ankmy1	0.402998	-0.84492	0.008	0.012	1	2
F2rl1	0.412262	-0.844572	0.011	0.017	1	2
Inf2	0.0279395	-0.84413	0.03	0.056	1	2
Tbc1d8	0.758717	-0.843682	0.01	0.011	1	2
Prdm15	0.167985	-0.843553	0.034	0.049	1	2
Wdr25	0.412304	-0.841961	0.017	0.023	1	2
Plbd2	0.220503	-0.841788	0.034	0.047	1	2
Cep112	0.194426	-0.841612	0.004	0.01	1	2
Ctu1	0.408309	-0.841579	0.01	0.015	1	2
Mogat1	0.203214	-0.840903	0.023	0.035	1	2
Gprc5a	0.402998	-0.840887	0.008	0.012	1	2
Trib1	0.874959	-0.840555	0.011	0.012	1	2
Tesk2	0.0861485	-0.837445	0.017	0.032	1	2
Lima1	0.386085	-0.836534	0.006	0.01	1	2
Bahcc1	0.0180356	-0.83632	0.03	0.058	1	2
Tubgcp4	0.104255	-0.836065	0.095	0.119	1	2
Glrx	0.0994775	-0.834369	0.055	0.077	1	2
Rmnd1	0.231785	-0.833098	0.055	0.07	1	2
Tlr4	0.14722	-0.832291	0.034	0.05	1	2
Nemp1	0.0554216	-0.83026	0.055	0.082	1	2
Stom	0.51255	-0.82929	0.008	0.011	1	2
Zbtb41	0.0681905	-0.829173	0.055	0.079	1	2
Tbc1d4	0.975919	-0.828134	0.029	0.028	1	2
Amy1	0.639533	-0.828023	0.008	0.01	1	2
Sbk2	0.506512	-0.827712	0.008	0.011	1	2
Zfp119b	0.0779536	-0.826979	0.01	0.022	1	2
Bhlhe41	0.757564	-0.825902	0.01	0.011	1	2
Gcnt1	0.00807168	-0.825689	0.09	0.135	1	2
Or2w1b	0.387477	-0.824737	0.006	0.01	1	2
Igf2bp3	0.284618	-0.824472	0.025	0.035	1	2
Zbtb7b	0.0783988	-0.824002	0.032	0.053	1	2
Bend6	0.0984157	-0.823997	0.015	0.029	1	2
Kit	0.000141187	-0.822954	0.143	0.221	1	2
Ccdc138	0.144267	-0.822854	0.027	0.041	1	2
Parp6	0.0306316	-0.82146	0.053	0.084	1	2
Treml2	0.123705	-0.820761	0.029	0.045	1	2
Kif24	0.402146	-0.820443	0.008	0.012	1	2
Mrps2	0.317824	-0.818806	0.008	0.013	1	2
Idi1	0.0610242	-0.816957	0.03	0.051	1	2
Ets2	0.078044	-0.815795	0.038	0.059	1	2
Sele	0.183579	-0.81537	0.013	0.023	1	2
Mapk7	0.973385	-0.813795	0.013	0.013	1	2
Cd46	0.0195255	-0.813207	0.032	0.06	1	2
Dusp8	0.274035	-0.810152	0.011	0.019	1	2
Nme6	0.415562	-0.80993	0.011	0.017	1	2
Pmepa1	0.0291733	-0.808888	0.061	0.093	1	2
Scamp1	0.738378	-0.808141	0.011	0.013	1	2
Irgm1	0.0413165	-0.807695	0.059	0.088	1	2
Arsg	0.914797	-0.807564	0.01	0.01	1	2
Tspyl4	0.379891	-0.80474	0.029	0.037	1	2
Ehhadh	0.194184	-0.804561	0.015	0.026	1	2
1700066M21Rik	0.172606	-0.804418	0.006	0.013	1	2
Phka2	0.345464	-0.802365	0.04	0.05	1	2
Gm10643	0.261529	-0.802305	0.01	0.017	1	2
Hdc	0.317114	-0.800112	0.008	0.013	1	2
Slc39a14	0.0686853	-0.79971	0.027	0.046	1	2
Gkap1	0.421096	-0.799423	0.011	0.017	1	2
Fancm	0.709085	-0.799017	0.032	0.036	1	2
Grik1	0.00969794	-0.798257	0.013	0.037	1	2
Tlcd3a	0.239503	-0.797228	0.017	0.027	1	2
Prkab2	0.027581	-0.79665	0.042	0.07	1	2
Smarcal1	0.144347	-0.796382	0.03	0.046	1	2
Plscr2	0.340701	-0.795526	0.011	0.018	1	2
Unk	0.155314	-0.794873	0.05	0.067	1	2
Slc7a7	0.247821	-0.794704	0.008	0.015	1	2
Oas1c	0.230242	-0.794251	0.038	0.051	1	2
Ctsh	0.504541	-0.793923	0.011	0.016	1	2
Nol4l	0.254598	-0.793764	0.053	0.068	1	2
Psmc3ip	0.416815	-0.791359	0.015	0.021	1	2
Hlf	0.511541	-0.79071	0.008	0.011	1	2
Aqp3	0.576963	-0.789272	0.017	0.021	1	2
Gjb2	0.182663	-0.789204	0.013	0.023	1	2
Wars1	0.0326218	-0.789118	0.072	0.105	1	2
Kif5c	0.339431	-0.784442	0.011	0.018	1	2
Casz1	0.243681	-0.78411	0.025	0.036	1	2
Slc35e4	0.23118	-0.783442	0.015	0.025	1	2
Purg	0.398447	-0.782879	0.025	0.032	1	2
Zfp280b	0.0951582	-0.781202	0.021	0.037	1	2
Slc17a5	0.0927862	-0.780508	0.046	0.067	1	2
Ifngr2	0.416297	-0.780288	0.011	0.017	1	2
Ccr10	0.318891	-0.780273	0.008	0.013	1	2
H2bc11	0.0496127	-0.779651	0.034	0.057	1	2
Irf4	0.174135	-0.779433	0.011	0.021	1	2
Atp10d	0.0701295	-0.778896	0.164	0.196	1	2
Tssk6	0.630838	-0.776677	0.023	0.027	1	2
Ccdc62	0.207311	-0.775785	0.01	0.018	1	2
Stat1	0.000609272	-0.775745	0.192	0.267	1	2
Dcun1d2	0.0790316	-0.77512	0.053	0.077	1	2
Rspry1	0.000484013	-0.77483	0.141	0.214	1	2
Cep290	0.627951	-0.774648	0.01	0.012	1	2
Fsd2	0.388407	-0.774106	0.006	0.01	1	2
Rfx2	0.342363	-0.77409	0.019	0.027	1	2
Klhl36	0.0215453	-0.772812	0.023	0.047	1	2
Parp3	0.0537028	-0.77266	0.05	0.075	1	2
Pld2	0.50852	-0.772405	0.008	0.011	1	2
Smarcd3	0.168267	-0.771975	0.021	0.034	1	2
Phf21b	0.624312	-0.771625	0.01	0.012	1	2
Neurl4	0.370329	-0.771559	0.03	0.039	1	2
Camk2b	2.85416e-06	-0.769656	0.17	0.277	0.0472363	2
Dok5	0.634889	-0.768307	0.008	0.01	1	2
Dhrs7b	0.0854542	-0.767089	0.057	0.081	1	2
Adap1	0.0712998	-0.766808	0.072	0.1	1	2
Nhlrc2	0.0150876	-0.766799	0.114	0.158	1	2
Eid2	0.613676	-0.765968	0.011	0.015	1	2
Epb41l5	0.0768396	-0.765235	0.002	0.01	1	2
St8sia6	0.114669	-0.76483	0.008	0.018	1	2
Osgin2	0.139611	-0.764668	0.057	0.077	1	2
Spp1	0.511725	-0.76342	0.01	0.013	1	2
Aco1	0.041783	-0.762286	0.032	0.056	1	2
Il12rb1	0.405049	-0.76184	0.019	0.026	1	2
Entpd7	0.935061	-0.761817	0.015	0.015	1	2
Tspoap1	0.135929	-0.759423	0.021	0.035	1	2
Cerkl	0.0804563	-0.758655	0.042	0.064	1	2
Sh3rf1	0.342667	-0.758112	0.08	0.093	1	2
Clock	0.00256467	-0.757608	0.099	0.154	1	2
Adgrl4	0.0496226	-0.756308	0.05	0.076	1	2
Platr25	0.284061	-0.7554	0.027	0.037	1	2
Map2k6	0.00792941	-0.754621	0.093	0.141	1	2
Hs6st1	0.151135	-0.754456	0.027	0.041	1	2
Bap1	0.206088	-0.754167	0.051	0.067	1	2
Parp12	0.040755	-0.753708	0.011	0.028	1	2
Spef2	0.172978	-0.75251	0.023	0.036	1	2
Maskbp3	0.626911	-0.752044	0.01	0.012	1	2
Poln	0.109863	-0.751715	0.03	0.048	1	2
Gas2	0.210528	-0.751668	0.023	0.035	1	2
Igsf5	0.636049	-0.749626	0.008	0.01	1	2
Slc12a2	0.296239	-0.749448	0.025	0.035	1	2
Mki67	0.226051	-0.749232	0.006	0.012	1	2
Abcb8	0.275113	-0.746909	0.011	0.019	1	2
Btd	0.105056	-0.746643	0.029	0.046	1	2
Oas1b	0.492186	-0.746474	0.017	0.022	1	2
Ankrd13d	0.344466	-0.745413	0.013	0.02	1	2
Ints12	0.164955	-0.743392	0.04	0.056	1	2
Taf9	0.388873	-0.743283	0.006	0.01	1	2
Polrmt	0.663296	-0.743059	0.019	0.022	1	2
Irf5	0.117042	-0.742337	0.046	0.065	1	2
Ndst1	0.0781541	-0.742142	0.057	0.082	1	2
Atxn7l2	0.736811	-0.741261	0.011	0.013	1	2
Polr1b	0.162271	-0.7412	0.019	0.031	1	2
Trpt1	0.319961	-0.740862	0.008	0.013	1	2
Hgs	0.195154	-0.740366	0.055	0.072	1	2
9530077C05Rik	0.634889	-0.740306	0.008	0.01	1	2
Strada	0.026844	-0.739335	0.097	0.134	1	2
Brca1	0.285939	-0.738054	0.015	0.023	1	2
Trim34a	0.0406978	-0.736982	0.095	0.129	1	2
Tceanc2	0.0621138	-0.735627	0.063	0.089	1	2
Trmt5	0.505461	-0.73443	0.013	0.018	1	2
Pold1	0.127018	-0.734162	0.032	0.049	1	2
Nudt2	0.534218	-0.734096	0.034	0.04	1	2
Mbtps1	0.0339287	-0.73312	0.114	0.151	1	2
Nckap1	0.285445	-0.733109	0.015	0.023	1	2
H2ac18	0.0219103	-0.732756	0.099	0.139	1	2
Filip1l	0.00154011	-0.731761	0.253	0.314	1	2
Apbb3	0.108243	-0.731061	0.034	0.053	1	2
Arsk	0.242745	-0.730691	0.027	0.038	1	2
Gm7030	0.131769	-0.730301	0.017	0.03	1	2
Dpysl5	0.403424	-0.729459	0.008	0.012	1	2
Cdon	0.0638343	-0.729402	0.023	0.041	1	2
Rbm19	0.151306	-0.728676	0.038	0.055	1	2
Gm12258	0.503893	-0.727675	0.013	0.018	1	2
Gm10130	0.0103728	-0.72748	0.091	0.136	1	2
Pcgf2	0.14332	-0.727298	0.023	0.037	1	2
Mcph1	0.00290445	-0.727155	0.067	0.115	1	2
Zfp462	0.419985	-0.725868	0.011	0.017	1	2
Cep19	0.175515	-0.72546	0.03	0.045	1	2
Agpat4	0.0408183	-0.725447	0.065	0.096	1	2
Supt7l	0.28815	-0.725192	0.023	0.032	1	2
Creb5	0.763911	-0.723793	0.01	0.011	1	2
Fignl1	0.404277	-0.723238	0.008	0.012	1	2
Utp6	0.0541194	-0.723041	0.084	0.114	1	2
Acbd4	0.430279	-0.723021	0.03	0.038	1	2
Med23	0.209801	-0.722852	0.057	0.074	1	2
Wdr62	0.421671	-0.721263	0.013	0.019	1	2
Urb2	0.061447	-0.721085	0.019	0.037	1	2
Gba	0.0291785	-0.720683	0.059	0.091	1	2
Nek6	0.412639	-0.71971	0.01	0.015	1	2
Afg3l2	0.00319622	-0.719663	0.109	0.163	1	2
Nsdhl	0.126991	-0.719406	0.034	0.051	1	2
Gpd2	0.000324444	-0.719118	0.24	0.319	1	2
Pigh	0.177706	-0.718786	0.027	0.04	1	2
Kdm8	0.504869	-0.718318	0.015	0.02	1	2
Ripor3	0.337533	-0.718058	0.011	0.018	1	2
Myo1b	0.780922	-0.717807	0.017	0.019	1	2
B3galt2	0.819005	-0.717739	0.015	0.017	1	2
Cemip2	7.23107e-05	-0.717161	0.162	0.254	1	2
Dhdds	0.212669	-0.71643	0.063	0.079	1	2
Mastl	0.388873	-0.715354	0.006	0.01	1	2
Spag6l	0.110545	-0.71528	0.036	0.055	1	2
Eif5a2	0.330587	-0.715217	0.01	0.016	1	2
Galnt3	0.0107624	-0.714285	0.032	0.064	1	2
Tm9sf1	0.241882	-0.713297	0.027	0.038	1	2
Tfap4	0.414148	-0.712381	0.017	0.023	1	2
Pabpc1l	0.626391	-0.711445	0.01	0.012	1	2
Gmeb1	0.029875	-0.711295	0.086	0.121	1	2
Xrcc5	0.0729888	-0.710672	0.09	0.119	1	2
Kctd5	0.036302	-0.70999	0.05	0.078	1	2
Top2a	0.0896211	-0.709511	0.036	0.056	1	2
Msrb2	0.154734	-0.707527	0.032	0.048	1	2
Fggy	0.509526	-0.707133	0.008	0.011	1	2
Gm49450	0.263208	-0.705336	0.01	0.017	1	2
Tmem19	0.0715254	-0.703024	0.059	0.085	1	2
Slc36a1	0.0765194	-0.701156	0.032	0.053	1	2
Cldnd2	0.172428	-0.700106	0.036	0.051	1	2
Cd93	0.736811	-0.699048	0.011	0.013	1	2
Acad10	0.246553	-0.698936	0.025	0.036	1	2
Degs2	0.485833	-0.698557	0.021	0.027	1	2
Dennd6b	0.297035	-0.698451	0.006	0.011	1	2
Blm	0.0625799	-0.698347	0.074	0.103	1	2
Ms4a4c	0.000750116	-0.698342	0.126	0.197	1	2
Utp4	0.0222994	-0.697248	0.069	0.103	1	2
Exosc9	0.0792653	-0.696996	0.082	0.109	1	2
Tamm41	0.0909776	-0.696832	0.038	0.058	1	2
Sufu	0.0268277	-0.696349	0.061	0.094	1	2
Brf2	0.34209	-0.695847	0.025	0.034	1	2
2610021A01Rik	0.118481	-0.694898	0.051	0.072	1	2
Ahr	0.0144649	-0.694866	0.141	0.187	1	2
Dthd1	0.235243	-0.69461	0.019	0.029	1	2
Clip4	0.29104	-0.69367	0.021	0.03	1	2
Zc2hc1c	0.332265	-0.692992	0.01	0.016	1	2
Mcm2	0.353857	-0.692435	0.048	0.058	1	2
Sumf1	0.0578174	-0.69233	0.044	0.068	1	2
Gatb	0.147261	-0.690745	0.04	0.057	1	2
Dennd5a	0.00478754	-0.690555	0.131	0.186	1	2
Zdhhc6	0.00211438	-0.689908	0.07	0.123	1	2
Ank1	0.765067	-0.689272	0.01	0.011	1	2
Elac1	0.104993	-0.688804	0.03	0.048	1	2
Lratd2	0.15577	-0.688652	0.015	0.027	1	2
Zfp3	0.151753	-0.688529	0.03	0.046	1	2
Kif19a	0.14407	-0.687382	0.042	0.059	1	2
Hectd2	0.153158	-0.686772	0.036	0.053	1	2
Prkcz	0.292055	-0.68643	0.042	0.054	1	2
Ykt6	0.0204596	-0.685713	0.086	0.124	1	2
Parp1	0.0663278	-0.685048	0.08	0.109	1	2
Kmt5a	0.00417856	-0.685035	0.122	0.177	1	2
Cfap53	0.437267	-0.684677	0.013	0.009	1	2
Gm49368	0.408318	-0.68296	0.021	0.028	1	2
Dynlt2a2	0.026761	-0.682661	0.067	0.101	1	2
Slc48a1	0.0423125	-0.682385	0.053	0.082	1	2
Hcfc2	0.170367	-0.679883	0.042	0.058	1	2
Slc35a1	0.0936588	-0.678974	0.055	0.078	1	2
S100a9	0.0465725	-0.675943	0.04	0.065	1	2
Gm45871	0.179742	-0.675788	0.027	0.04	1	2
Stk39	0.000674624	-0.675316	0.225	0.298	1	2
Pole	0.426643	-0.67393	0.015	0.021	1	2
Acat2	0.0596077	-0.672144	0.046	0.07	1	2
Rgp1	0.123901	-0.672082	0.029	0.045	1	2
Lacc1	0.510809	-0.670982	0.01	0.013	1	2
Gpr63	0.8464	-0.669575	0.032	0.03	1	2
Pprc1	0.521036	-0.669367	0.038	0.045	1	2
Lamc1	0.898092	-0.669079	0.017	0.018	1	2
Nav2	0.150789	-0.668758	0.04	0.057	1	2
Ndufaf6	0.121299	-0.668588	0.027	0.043	1	2
Ncapg2	0.580009	-0.668256	0.017	0.021	1	2
Kalrn	0.19237	-0.66782	0.015	0.026	1	2
Sh3bp2	0.108554	-0.667572	0.038	0.057	1	2
Zwilch	0.698168	-0.667498	0.015	0.018	1	2
Gpr155	0.238438	-0.666989	0.036	0.049	1	2
Hdac7	0.00676655	-0.666552	0.15	0.204	1	2
Ctnnal1	0.332601	-0.665773	0.01	0.016	1	2
Xkr6	0.179046	-0.665766	0.036	0.051	1	2
Clic4	0.00754902	-0.665443	0.24	0.298	1	2
Taf2	0.0744659	-0.664342	0.076	0.103	1	2
Zfp236	0.0332433	-0.664056	0.107	0.142	1	2
Actn2	0.514242	-0.66203	0.011	0.016	1	2
1700001K19Rik	0.178193	-0.660856	0.03	0.045	1	2
Bcl2l1	0.00638603	-0.659863	0.152	0.21	1	2
Thap11	0.0572094	-0.659825	0.038	0.062	1	2
Prkci	0.149968	-0.658157	0.013	0.025	1	2
Trim12c	0.00446419	-0.658153	0.177	0.236	1	2
Dusp22	0.080912	-0.657798	0.055	0.079	1	2
Ppp2r5b	0.603413	-0.657667	0.013	0.017	1	2
Phf10	0.0494481	-0.657628	0.048	0.074	1	2
Nhej1	0.177231	-0.657556	0.025	0.038	1	2
Taf6l	0.340701	-0.657132	0.011	0.018	1	2
Trim30a	1.55885e-05	-0.657078	0.25	0.356	0.25799	2
Dus4l	0.0941671	-0.6562	0.04	0.06	1	2
Tcn2	0.0239473	-0.654836	0.065	0.1	1	2
Cyfip1	0.0280751	-0.653948	0.091	0.129	1	2
Chek1	0.387012	-0.652244	0.006	0.01	1	2
Emc1	0.0939879	-0.650947	0.048	0.069	1	2
Wee1	0.307782	-0.650891	0.044	0.056	1	2
Naif1	0.247821	-0.650441	0.008	0.015	1	2
Slc25a23	0.666426	-0.65001	0.019	0.022	1	2
Cdh23	0.108832	-0.649661	0.03	0.048	1	2
Uba7	0.100924	-0.648591	0.065	0.088	1	2
Csrp2	0.402572	-0.647235	0.008	0.012	1	2
Nfatc2	0.0271792	-0.646576	0.097	0.136	1	2
Klhl2	0.00707438	-0.645994	0.112	0.162	1	2
St6galnac3	0.00103405	-0.645805	0.316	0.389	1	2
Styx	0.0482243	-0.645147	0.078	0.11	1	2
Kmt5c	0.3796	-0.645121	0.032	0.041	1	2
Pnpla8	7.98142e-05	-0.645045	0.246	0.338	1	2
Serinc4	0.263769	-0.644763	0.01	0.017	1	2
Nfic	0.0167713	-0.644629	0.118	0.162	1	2
Rnf31	0.150249	-0.644188	0.042	0.059	1	2
Apex2	0.0878347	-0.644095	0.063	0.087	1	2
Fas	0.0546076	-0.642972	0.07	0.101	1	2
Vps33b	0.117009	-0.642968	0.059	0.081	1	2
Fhad1	0.516777	-0.642806	0.01	0.013	1	2
Sesn2	0.242968	-0.642295	0.051	0.066	1	2
Abca3	0.129471	-0.641914	0.01	0.02	1	2
Abraxas2	0.0833942	-0.64158	0.051	0.075	1	2
Macrod1	0.556709	-0.641175	0.032	0.038	1	2
Ppm1l	0.44945	-0.64059	0.061	0.07	1	2
Xylt1	0.0170767	-0.640444	0.15	0.197	1	2
Zfp963	0.627951	-0.640381	0.01	0.012	1	2
Zmym6	0.220366	-0.639772	0.046	0.06	1	2
Tha1	0.0695036	-0.63963	0.04	0.063	1	2
Ptp4a1.1	0.419985	-0.639351	0.011	0.017	1	2
Agbl3	0.290162	-0.639224	0.015	0.023	1	2
Slc41a3	0.147963	-0.638612	0.013	0.025	1	2
Sh3bp5	0.109656	-0.638035	0.044	0.064	1	2
Taf1a	0.110699	-0.637309	0.067	0.089	1	2
Taf6	0.105484	-0.637006	0.029	0.046	1	2
Zdhhc14	0.219346	-0.636393	0.011	0.02	1	2
Pgap1	0.330252	-0.636348	0.01	0.016	1	2
Pms1	0.0834347	-0.636019	0.055	0.078	1	2
Homer1	0.416645	-0.635217	0.154	0.164	1	2
Ppp2r3d	0.0554941	-0.634939	0.046	0.07	1	2
Cldn10	0.746241	-0.634505	0.01	0.008	1	2
Sh2d4b	0.872715	-0.634359	0.011	0.012	1	2
Zfp69	0.631889	-0.633849	0.023	0.027	1	2
Plpp5	0.351802	-0.633513	0.021	0.029	1	2
Gcnt7	0.23268	-0.633	0.038	0.051	1	2
Dusp28	0.398702	-0.632422	0.025	0.032	1	2
Ipo13	0.567829	-0.632304	0.019	0.023	1	2
Slc39a4	0.35004	-0.632144	0.017	0.025	1	2
Sh2d1b1	0.0163183	-0.631942	0.177	0.22	1	2
Mast4	0.0474008	-0.631375	0.088	0.122	1	2
Thnsl1	0.065095	-0.631218	0.015	0.031	1	2
Gcdh	0.146442	-0.631198	0.025	0.039	1	2
Foxred2	0.185421	-0.629697	0.013	0.023	1	2
Kcnip1	0.0613823	-0.629188	0.05	0.075	1	2
Gm6133	0.514018	-0.628562	0.01	0.013	1	2
Chrnb1	0.227256	-0.628155	0.006	0.012	1	2
Lztfl1	0.357866	-0.627046	0.13	0.142	1	2
Hsdl2	0.0443112	-0.62665	0.082	0.115	1	2
Ipo5	0.056485	-0.626554	0.093	0.125	1	2
Micall1	0.789537	-0.625713	0.07	0.066	1	2
Cln8	0.404704	-0.624828	0.008	0.012	1	2
Tmem106c	0.145508	-0.624656	0.023	0.037	1	2
Jag1	0.297789	-0.624033	0.006	0.011	1	2
Dvl1	0.12674	-0.623852	0.027	0.043	1	2
Nacc1	0.033385	-0.623571	0.074	0.109	1	2
Zfp710	0.0694198	-0.623486	0.074	0.102	1	2
Emid1	0.0263649	-0.623169	0.099	0.139	1	2
Ccdc106	0.388873	-0.62292	0.006	0.01	1	2
Ppp2r3c	0.0279383	-0.620939	0.086	0.122	1	2
H4c14	0.176061	-0.620924	0.057	0.075	1	2
Ndor1.1	0.614623	-0.620452	0.011	0.015	1	2
Mocs3	0.0846901	-0.620196	0.025	0.043	1	2
Tnfsf10	0.0355243	-0.619054	0.099	0.135	1	2
Tmem9	0.150854	-0.618958	0.03	0.046	1	2
Fbxo27	0.348115	-0.618471	0.015	0.022	1	2
Gm527	0.249137	-0.618469	0.023	0.034	1	2
Bend4	0.373209	-0.617381	0.057	0.068	1	2
Accs	0.398218	-0.616948	0.044	0.054	1	2
Setd6	0.353018	-0.616422	0.023	0.031	1	2
Antxr2	0.0364496	-0.616038	0.198	0.24	1	2
Zfp26	0.153836	-0.615214	0.08	0.101	1	2
Adcy9	0.606476	-0.615189	0.013	0.017	1	2
Vwa5a	0.210465	-0.614587	0.032	0.046	1	2
Dync2h1	0.0167328	-0.614209	0.055	0.091	1	2
Slc33a1	0.13416	-0.614024	0.063	0.084	1	2
Sgce	0.319604	-0.613987	0.008	0.013	1	2
Ulk4	0.145046	-0.613902	0.004	0.011	1	2
Fancc	0.081299	-0.612457	0.133	0.163	1	2
Dock9	0.0591026	-0.612375	0.109	0.141	1	2
Agbl1	0.641861	-0.612316	0.008	0.01	1	2
Gna15	0.0198493	-0.610462	0.12	0.163	1	2
Ccdc146	0.179606	-0.609695	0.027	0.04	1	2
Dusp3	0.529606	-0.609622	0.051	0.058	1	2
Zfp867	0.567829	-0.60955	0.019	0.023	1	2
Rab20	0.0666135	-0.60939	0.04	0.063	1	2
Fxr2	0.0953078	-0.609292	0.057	0.081	1	2
Ap2a2	0.146485	-0.608776	0.112	0.135	1	2
Pgm1	0.100098	-0.60872	0.067	0.091	1	2
Ano8	0.234554	-0.608484	0.015	0.025	1	2
Cpsf1	0.0688325	-0.60813	0.05	0.074	1	2
Arl6	0.50852	-0.607242	0.008	0.011	1	2
Engase	0.275653	-0.607237	0.011	0.019	1	2
Nsun6	0.0145585	-0.606349	0.158	0.205	1	2
Cul4a	0.0477981	-0.605723	0.078	0.11	1	2
Ntpcr	0.114029	-0.604718	0.046	0.066	1	2
Apobr	0.000903795	-0.603441	0.105	0.169	1	2
Mbtps2	0.108326	-0.602667	0.072	0.097	1	2
Pwp2	0.410275	-0.602559	0.021	0.028	1	2
Aplf	0.204445	-0.602432	0.021	0.032	1	2
Phactr2	0.0857256	-0.602047	0.04	0.062	1	2
Nphs1	0.163064	-0.601485	0.01	0.019	1	2
Gbp5	0.130742	-0.601177	0.072	0.095	1	2
Natd1	0.21172	-0.600688	0.027	0.039	1	2
Tti2	0.150425	-0.600239	0.027	0.041	1	2
Tmem63b	0.472063	-0.600122	0.063	0.072	1	2
Mtmr2	0.018986	-0.600099	0.093	0.135	1	2
Castor1	0.153564	-0.599739	0.03	0.046	1	2
Iqce	0.239788	-0.599453	0.036	0.049	1	2
Gm5617	0.0447794	-0.598376	0.063	0.093	1	2
Gca	0.172151	-0.598153	0.019	0.031	1	2
Kif3b	0.257435	-0.597651	0.093	0.11	1	2
Zfp608	0.0896034	-0.596761	0.105	0.133	1	2
Spo11	0.418139	-0.595815	0.011	0.017	1	2
Ski	0.00517427	-0.595413	0.248	0.303	1	2
Csnk1e	0.289202	-0.594336	0.072	0.086	1	2
Miga1	0.126852	-0.59343	0.034	0.051	1	2
Herc6	0.0284461	-0.593353	0.128	0.17	1	2
Hip1	0.00107136	-0.593084	0.24	0.312	1	2
Fhip2a	0.0340778	-0.592212	0.107	0.144	1	2
Gopc	0.00228417	-0.592092	0.101	0.159	1	2
Zmat3	0.208071	-0.591744	0.036	0.05	1	2
Rbms2	0.211431	-0.591737	0.101	0.119	1	2
Atat1	0.350314	-0.591533	0.017	0.025	1	2
Ccdc112	0.387942	-0.591281	0.006	0.01	1	2
H2ac20	0.115611	-0.591225	0.082	0.106	1	2
Ttc9c	0.0122503	-0.590795	0.074	0.116	1	2
Vmac	0.158525	-0.5892	0.015	0.027	1	2
Myo3b	0.0283083	-0.589158	0.088	0.124	1	2
Bcr	0.147172	-0.58909	0.057	0.077	1	2
Ube2o	0.342544	-0.588981	0.029	0.038	1	2
Ddx49	0.217235	-0.588814	0.061	0.077	1	2
Hspb1	0.399044	-0.588562	0.059	0.07	1	2
Wls	0.0119234	-0.588523	0.171	0.22	1	2
Snx29	0.0480361	-0.587973	0.166	0.202	1	2
Mpdu1	0.122223	-0.58738	0.133	0.158	1	2
Mtg1	0.287768	-0.587208	0.029	0.039	1	2
Mpi	0.418508	-0.58709	0.011	0.017	1	2
Nanp	0.435578	-0.587087	0.03	0.038	1	2
2900026A02Rik	0.305481	-0.585241	0.057	0.07	1	2
Garre1	0.0173893	-0.585077	0.166	0.215	1	2
Hspbap1	0.17768	-0.584474	0.03	0.045	1	2
Cc2d1b	0.126068	-0.584407	0.057	0.078	1	2
Dpp9	0.341696	-0.584379	0.08	0.093	1	2
Aarsd1	0.0270689	-0.583746	0.01	0.027	1	2
Dhx57	0.319128	-0.58349	0.063	0.076	1	2
Kics2	0.350122	-0.583422	0.015	0.022	1	2
Sgk3	0.0228717	-0.583404	0.065	0.1	1	2
Trim46	0.491164	-0.583146	0.019	0.025	1	2
Lcmt2	0.255052	-0.583054	0.027	0.038	1	2
Prepl	0.394337	-0.582755	0.027	0.035	1	2
Slc25a30	0.0588865	-0.582657	0.072	0.102	1	2
Gm1043	0.150592	-0.582162	0.042	0.059	1	2
Lrrc75a	0.247752	-0.581561	0.021	0.031	1	2
Scart1	0.151253	-0.58103	0.027	0.041	1	2
Aifm2	0.289913	-0.580948	0.015	0.023	1	2
Pmaip1	0.377529	-0.580595	0.112	0.124	1	2
Cep70	0.279819	-0.580358	0.036	0.048	1	2
Paqr3	0.347396	-0.579824	0.025	0.034	1	2
Vkorc1	0.20554	-0.57963	0.059	0.076	1	2
Egln2	0.0694377	-0.579375	0.095	0.125	1	2
Rad51b	0.149801	-0.579279	0.036	0.053	1	2
Tap1	0.00421406	-0.579253	0.177	0.236	1	2
Dok1	0.458346	-0.5792	0.055	0.064	1	2
Elmod2	0.294562	-0.578593	0.021	0.03	1	2
Or2v1	0.581154	-0.578119	0.017	0.021	1	2
Acad9	0.10137	-0.57702	0.07	0.095	1	2
Slc17a9	0.194567	-0.576578	0.05	0.066	1	2
Rragc	0.196964	-0.57646	0.122	0.142	1	2
Prdm1	0.218783	-0.576342	0.166	0.186	1	2
Txnrd3	0.90202	-0.575713	0.03	0.031	1	2
Tnip3	0.487558	-0.575394	0.019	0.025	1	2
Tesc	0.0816378	-0.575374	0.036	0.057	1	2
Bspry	0.358016	-0.574878	0.04	0.05	1	2
Dnajb5	0.352231	-0.574561	0.017	0.025	1	2
Acpp	0.0418808	-0.573521	0.057	0.086	1	2
Itprid2	0.0144448	-0.573465	0.072	0.112	1	2
Ddx20	0.178825	-0.57346	0.042	0.058	1	2
Uhrf1bp1	0.510533	-0.573312	0.008	0.011	1	2
Ccdc148	0.112798	-0.57322	0.04	0.059	1	2
Dpp4	0.423831	-0.571808	0.036	0.045	1	2
Prkd2	0.0472692	-0.571585	0.105	0.139	1	2
Psmd3	0.0543637	-0.571443	0.114	0.148	1	2
Fmr1	0.00197081	-0.570902	0.217	0.286	1	2
Ano6	0.0767855	-0.570087	0.147	0.18	1	2
Afdn	0.0390429	-0.569084	0.074	0.107	1	2
Slx4	0.371928	-0.568301	0.036	0.046	1	2
Dop1a	0.111779	-0.568265	0.095	0.121	1	2
Tigit	0.162753	-0.567899	0.069	0.088	1	2
Ppfibp1	0.931545	-0.567418	0.034	0.035	1	2
Nop16	0.231042	-0.567122	0.057	0.073	1	2
Ctdspl2	0.00335255	-0.567085	0.221	0.285	1	2
Gm20696	0.266137	-0.566191	0.124	0.141	1	2
Gramd1b	9.75372e-06	-0.565978	0.434	0.519	0.161424	2
Lrp1b	0.149496	-0.565384	0.029	0.044	1	2
Haao	0.0926965	-0.564307	0.048	0.069	1	2
Tbc1d13	0.472727	-0.563701	0.055	0.064	1	2
Glcci1	0.399009	-0.563165	0.029	0.037	1	2
Apobec1	0.0778968	-0.563085	0.078	0.106	1	2
Ctss	0.027145	-0.563056	0.158	0.2	1	2
Alox5ap	0.416599	-0.562968	0.01	0.015	1	2
Fan1	0.269014	-0.562852	0.042	0.055	1	2
G2e3	0.0897598	-0.562112	0.069	0.094	1	2
Cd101	0.234543	-0.561341	0.013	0.022	1	2
Niban1	0.027833	-0.561158	0.242	0.289	1	2
Bcl7a	0.380223	-0.561118	0.044	0.054	1	2
Tmem241	0.151784	-0.561072	0.09	0.112	1	2
Dis3	0.254849	-0.560266	0.029	0.04	1	2
Araf	0.0111711	-0.560052	0.139	0.189	1	2
Kdm4a	0.0697077	-0.557455	0.069	0.095	1	2
Rpp40	0.607791	-0.556941	0.013	0.017	1	2
Sec23a	0.121673	-0.55663	0.091	0.116	1	2
Itpripl2	0.972443	-0.556609	0.017	0.017	1	2
Actr6	0.316503	-0.55584	0.063	0.076	1	2
2310022B05Rik	0.628472	-0.555517	0.01	0.012	1	2
Zfr2	0.844994	-0.555477	0.013	0.015	1	2
Brd7	0.00453212	-0.555345	0.15	0.209	1	2
Slc25a16	0.127835	-0.555298	0.076	0.1	1	2
Rnf26	0.589195	-0.554965	0.017	0.021	1	2
Crbn	0.0520736	-0.554185	0.086	0.116	1	2
Nanos1	0.876642	-0.554041	0.011	0.012	1	2
Ccr9	0.240221	-0.553681	0.029	0.04	1	2
Zfp414	0.324275	-0.55358	0.048	0.059	1	2
Epb41l2	0.000946509	-0.553571	0.2	0.275	1	2
Rev3l	5.55965e-05	-0.553411	0.371	0.471	0.920122	2
Aph1c	0.344208	-0.553365	0.011	0.018	1	2
Ror1	0.331276	-0.552924	0.038	0.049	1	2
Syvn1	0.339187	-0.552797	0.065	0.077	1	2
Dennd11	0.741676	-0.552792	0.029	0.031	1	2
Arrdc3	0.000169279	-0.552706	0.179	0.263	1	2
Tnfsf4	0.389338	-0.55266	0.006	0.01	1	2
Pitpnm1	0.0492413	-0.551528	0.112	0.147	1	2
Gpcpd1	0.00134136	-0.550862	0.265	0.331	1	2
Dclk2	0.510029	-0.550494	0.008	0.011	1	2
Rad9b	0.350295	-0.550405	0.021	0.029	1	2
Shld1	0.0259225	-0.550329	0.116	0.158	1	2
Gpatch4	0.383123	-0.550315	0.044	0.054	1	2
Eeig2	0.242086	-0.550002	0.063	0.079	1	2
Tg	0.334041	-0.549861	0.048	0.059	1	2
Spata6	0.0287858	-0.549376	0.137	0.177	1	2
Gapdhs	0.495643	-0.549162	0.017	0.022	1	2
Gapt	0.874398	-0.549068	0.011	0.012	1	2
Strip1	0.249711	-0.549049	0.051	0.066	1	2
Cd2bp2	0.0579134	-0.547539	0.11	0.142	1	2
Rptor	0.01756	-0.547443	0.352	0.399	1	2
Cyp4f13	0.112434	-0.546881	0.072	0.095	1	2
Stat5a	0.263837	-0.546089	0.112	0.131	1	2
Slc20a1	0.000735187	-0.546039	0.19	0.267	1	2
Kmt2b	0.121804	-0.545689	0.103	0.128	1	2
Zc3h6	0.142281	-0.545633	0.065	0.085	1	2
Bdh1	0.298166	-0.545402	0.006	0.011	1	2
Rab39	0.402998	-0.545049	0.008	0.012	1	2
Zfp808	0.734746	-0.544904	0.04	0.036	1	2
Ubqln1	0.00082032	-0.544898	0.24	0.319	1	2
Ifi211	0.0951689	-0.54479	0.038	0.058	1	2
H2-T22	4.94075e-05	-0.544534	0.295	0.393	0.817694	2
Gins3	0.500452	-0.543101	0.015	0.02	1	2
Gdap2	0.641629	-0.542883	0.103	0.107	1	2
Kcnk10	0.103981	-0.541454	0.088	0.114	1	2
Mfsd8	0.307506	-0.541051	0.051	0.064	1	2
Adssl1	0.107645	-0.540521	0.032	0.05	1	2
Abtb2	0.00313347	-0.540386	0.234	0.304	1	2
Ifi35	0.000864379	-0.540347	0.19	0.266	1	2
Igip	0.618419	-0.540343	0.011	0.015	1	2
Tti1	0.280663	-0.540223	0.036	0.048	1	2
Atad5	0.602183	-0.539922	0.027	0.031	1	2
Eif2b5	0.101827	-0.539425	0.072	0.097	1	2
Nadsyn1	0.213901	-0.538826	0.027	0.039	1	2
Odad1	0.186162	-0.53867	0.013	0.023	1	2
Rfng	0.298782	-0.538291	0.021	0.03	1	2
Tubgcp3	0.127701	-0.538135	0.086	0.11	1	2
Ifi206	0.11402	-0.538117	0.168	0.197	1	2
Abi3bp	0.42063	-0.538061	0.013	0.019	1	2
Leo1	0.259242	-0.537719	0.065	0.081	1	2
Zfp384	0.0937019	-0.537075	0.074	0.1	1	2
Nadk	0.0803294	-0.537053	0.074	0.102	1	2
H4c1	0.315969	-0.536805	0.04	0.051	1	2
Fbxl20	0.0109699	-0.536751	0.171	0.227	1	2
Gm10053	0.347177	-0.536608	0.013	0.02	1	2
Rrnad1	0.197116	-0.536598	0.065	0.083	1	2
Ino80c	0.201607	-0.5364	0.061	0.078	1	2
Aim2	0.000133551	-0.5358	0.263	0.351	1	2
Endod1	0.381285	-0.535725	0.044	0.054	1	2
Pyroxd1	0.127382	-0.535478	0.046	0.065	1	2
Zfp810	0.312797	-0.53539	0.059	0.072	1	2
H1f4	7.63435e-05	-0.535157	0.44	0.535	1	2
H2-Eb1	0.0874888	-0.53507	0.059	0.083	1	2
Ubp1	0.0410776	-0.534427	0.187	0.224	1	2
Fyco1	0.0418152	-0.53379	0.09	0.124	1	2
Dhx35	0.161349	-0.533704	0.038	0.055	1	2
Entpd1	0.135768	-0.533378	0.093	0.117	1	2
Cnpy2	0.0854435	-0.533213	0.118	0.149	1	2
Gsta3	0.512971	-0.532995	0.011	0.016	1	2
St8sia1	0.350143	-0.532932	0.019	0.027	1	2
Pkp2	0.701728	-0.532739	0.015	0.018	1	2
Rpusd1	0.628472	-0.532288	0.01	0.012	1	2
Pik3c2a	0.111005	-0.530755	0.128	0.157	1	2
Msl1	0.173545	-0.529971	0.118	0.141	1	2
Swsap1	0.698168	-0.529898	0.015	0.018	1	2
Adar	0.0387931	-0.528671	0.069	0.101	1	2
Fbxo45	0.480286	-0.528351	0.036	0.044	1	2
Gzmb	0.0111342	-0.527598	0.375	0.425	1	2
Armc2	0.971073	-0.527518	0.023	0.022	1	2
Unc5cl	0.133291	-0.52728	0.017	0.03	1	2
Pogk	0.00165455	-0.527235	0.137	0.204	1	2
Glt8d1	0.37926	-0.526961	0.044	0.054	1	2
Spryd4	0.702619	-0.526947	0.015	0.018	1	2
Gtf2ird2	0.15218	-0.526877	0.067	0.087	1	2
Arnt2	0.616994	-0.526316	0.011	0.015	1	2
Mbnl3	0.109987	-0.526107	0.103	0.13	1	2
Ankrd37	0.318535	-0.525833	0.008	0.013	1	2
Tmco6	0.215665	-0.525528	0.04	0.055	1	2
Gnaq	0.025274	-0.525359	0.168	0.213	1	2
Lgals8	0.00292671	-0.525235	0.135	0.197	1	2
Nubpl	0.047249	-0.525137	0.034	0.058	1	2
S100pbp	0.256579	-0.524398	0.08	0.096	1	2
Zfp606	0.459794	-0.523868	0.025	0.031	1	2
Uhmk1	0.00148981	-0.523767	0.137	0.199	1	2
Fry	0.00784754	-0.523671	0.181	0.24	1	2
N4bp1	0.00161418	-0.523665	0.257	0.332	1	2
Traip	0.511541	-0.523661	0.008	0.011	1	2
Ripor1	0.410886	-0.522942	0.038	0.047	1	2
H2-Ab1	0.0382728	-0.522793	0.059	0.089	1	2
Cmc2	0.0733311	-0.522508	0.084	0.113	1	2
Nlrc5	0.000295787	-0.522151	0.261	0.342	1	2
Cfap126	0.210306	-0.522128	0.044	0.059	1	2
Stat2	0.274862	-0.522076	0.076	0.092	1	2
Cables1	0.248903	-0.521702	0.107	0.124	1	2
Btbd19	0.106578	-0.52114	0.025	0.041	1	2
Stx17	0.0763287	-0.52105	0.13	0.16	1	2
Psmc1	0.0151556	-0.520657	0.122	0.167	1	2
Faap100	0.807233	-0.520595	0.03	0.032	1	2
4931406C07Rik	0.20758	-0.520384	0.023	0.035	1	2
Plcg1	0.982269	-0.520301	0.025	0.025	1	2
Notch2	0.0103269	-0.520284	0.183	0.237	1	2
Ttc8	0.421096	-0.519925	0.011	0.017	1	2
Selenoo	0.519476	-0.519559	0.048	0.055	1	2
Zfp14	0.413825	-0.518419	0.01	0.015	1	2
Slc26a2	0.154406	-0.518347	0.05	0.068	1	2
Slc25a1	0.11541	-0.517712	0.042	0.062	1	2
Rnf169	0.00110459	-0.517525	0.248	0.32	1	2
Sag	0.907762	-0.517413	0.03	0.029	1	2
Fam193a	0.00243316	-0.517347	0.25	0.319	1	2
Smyd2	0.334622	-0.517078	0.029	0.038	1	2
Utp20	0.188031	-0.517028	0.055	0.073	1	2
Arhgap5	0.0631539	-0.517026	0.095	0.128	1	2
Wwox	0.00877254	-0.516811	0.307	0.368	1	2
Prkg1	0.231212	-0.516275	0.013	0.022	1	2
Il2	0.300056	-0.516124	0.019	0.028	1	2
Tfcp2	0.0978539	-0.515736	0.061	0.085	1	2
Ss18l1	0.616994	-0.515368	0.011	0.015	1	2
Fbxl14	0.0479434	-0.514967	0.082	0.113	1	2
Zcchc24	0.245093	-0.514851	0.017	0.027	1	2
Gmfb	0.00754507	-0.514682	0.217	0.276	1	2
Srebf1	0.558871	-0.514646	0.076	0.084	1	2
Noct	0.76708	-0.514608	0.029	0.031	1	2
Bbs4	0.212362	-0.514435	0.025	0.037	1	2
Cmtr1	0.417401	-0.514185	0.011	0.017	1	2
Ece1	0.208619	-0.514056	0.082	0.102	1	2
Orc3	0.0948189	-0.513903	0.137	0.166	1	2
Hdhd2	0.165763	-0.513899	0.069	0.088	1	2
Qrsl1	0.157847	-0.513772	0.042	0.059	1	2
Map3k11	0.100399	-0.51376	0.053	0.076	1	2
Marf1	0.0234843	-0.513052	0.152	0.199	1	2
Vps37a	0.0509866	-0.512988	0.143	0.181	1	2
P2rx4	0.672062	-0.512981	0.051	0.056	1	2
E2f3	0.111384	-0.512974	0.048	0.068	1	2
Kyat3	0.981986	-0.512922	0.013	0.013	1	2
Pskh1	0.181555	-0.512671	0.038	0.054	1	2
Utf1	0.258872	-0.512523	0.032	0.045	1	2
Nudt19	0.0997717	-0.512087	0.088	0.114	1	2
H4c8	0.139632	-0.512022	0.099	0.123	1	2
Ubtd1	0.768322	-0.511224	0.042	0.045	1	2
Rnf135	0.571066	-0.511115	0.019	0.023	1	2
Ttc4	0.548348	-0.510968	0.107	0.113	1	2
Trp53i13	0.953129	-0.510903	0.027	0.027	1	2
Nars2	0.105429	-0.5109	0.08	0.106	1	2
Sil1	0.0648923	-0.510717	0.112	0.147	1	2
Ap4e1	0.243822	-0.510557	0.067	0.083	1	2
Rnf122	0.27361	-0.510556	0.046	0.059	1	2
Cnep1r1	0.0283206	-0.510045	0.126	0.166	1	2
Slco3a1	0.0307471	-0.509795	0.223	0.265	1	2
Cep162	0.131511	-0.509637	0.074	0.097	1	2
Bsn	0.712357	-0.509585	0.04	0.044	1	2
Zkscan7	0.169078	-0.509048	0.017	0.029	1	2
Armt1	0.116052	-0.50894	0.048	0.068	1	2
Dgcr8	0.501869	-0.508823	0.051	0.059	1	2
Slc25a28	0.144174	-0.508744	0.069	0.091	1	2
Zfp446	0.843933	-0.508734	0.021	0.022	1	2
Mfsd1	0.172442	-0.508732	0.069	0.088	1	2
Mmab	0.415052	-0.508731	0.021	0.028	1	2
Prr12	0.247616	-0.508202	0.055	0.07	1	2
Lpin1	0.00663528	-0.507993	0.234	0.295	1	2
Arpp21	0.655889	-0.506373	0.011	0.009	1	2
Smpd2	0.573229	-0.506162	0.019	0.023	1	2
B630019K06Rik	0.509169	-0.505859	0.011	0.016	1	2
Gm19684	0.0160185	-0.505792	0.112	0.158	1	2
Snai3	0.737452	-0.505377	0.021	0.023	1	2
Numb	0.0353389	-0.505225	0.253	0.292	1	2
Furin	0.419217	-0.504698	0.107	0.119	1	2
Klc3	0.511541	-0.504614	0.008	0.011	1	2
Wdcp	0.216947	-0.504599	0.032	0.046	1	2
Cnih4	0.0066776	-0.504323	0.147	0.205	1	2
Mid1ip1	0.071669	-0.504288	0.069	0.096	1	2
Cep95	0.0506363	-0.503917	0.076	0.107	1	2
Inhca	0.193952	-0.503754	0.008	0.016	1	2
Cenpk	0.413694	-0.50354	0.038	0.047	1	2
Rwdd2b	0.571066	-0.503531	0.019	0.023	1	2
Ccdc47	0.00589696	-0.503453	0.217	0.275	1	2
Sumf2	0.256677	-0.503394	0.05	0.064	1	2
Zbtb2	0.0965638	-0.503378	0.112	0.141	1	2
Bcor	0.0584043	-0.503178	0.19	0.226	1	2
Cdc27	0.0427448	-0.503143	0.168	0.208	1	2
Klc2	0.481157	-0.503016	0.021	0.027	1	2
Champ1	0.551863	-0.502904	0.023	0.028	1	2
Kdm3a	0.0785604	-0.502672	0.196	0.226	1	2
Ccdc184	0.231654	-0.502542	0.013	0.022	1	2
Mccc1	0.34915	-0.502032	0.023	0.031	1	2
Plekhf2	0.0871024	-0.501761	0.088	0.115	1	2
Flywch1	0.18247	-0.50174	0.04	0.056	1	2
Prc1	0.295653	-0.501489	0.019	0.028	1	2
Gm8369	0.6163	-0.500713	0.074	0.066	1	2
Mtrfr	0.0909589	-0.50066	0.063	0.087	1	2
Angel2	0.00617599	-0.499569	0.133	0.19	1	2
Nxn	0.486938	-0.499485	0.091	0.101	1	2
Rhbdd2	0.964488	-0.499401	0.038	0.037	1	2
App	0.237418	-0.499366	0.04	0.054	1	2
Eri2	0.485597	-0.499234	0.019	0.025	1	2
Capn1	0.0194683	-0.498784	0.147	0.195	1	2
Rrm2	0.878138	-0.498672	0.013	0.012	1	2
Dusp6	0.424231	-0.4985	0.091	0.103	1	2
Vipas39	0.0654133	-0.498437	0.05	0.075	1	2
Cxadr	0.29024	-0.498397	0.034	0.046	1	2
Wiz	0.302106	-0.497505	0.046	0.058	1	2
Clcn5	0.918166	-0.497312	0.074	0.074	1	2
Cdk2	0.585934	-0.496749	0.017	0.021	1	2
Klc4	0.148465	-0.496742	0.023	0.037	1	2
Dstyk	0.192882	-0.496272	0.051	0.068	1	2
Sft2d3	0.196416	-0.495774	0.099	0.119	1	2
Iars	0.0640892	-0.495581	0.112	0.145	1	2
Rragb	0.136487	-0.49543	0.046	0.065	1	2
Gcc1	0.561467	-0.495305	0.032	0.038	1	2
Taf8	0.161931	-0.495248	0.061	0.081	1	2
Il6ra	0.696834	-0.495079	0.015	0.018	1	2
Alkbh4	0.32863	-0.494305	0.048	0.059	1	2
Qtrt1	0.152969	-0.493838	0.107	0.132	1	2
Rfx5	0.0522085	-0.493705	0.029	0.05	1	2
Ipp	0.559506	-0.493657	0.032	0.038	1	2
Tiam2	0.00338806	-0.493185	0.122	0.18	1	2
Tom1l2	0.241651	-0.492865	0.133	0.153	1	2
Mrnip	0.259763	-0.492829	0.09	0.106	1	2
Ercc1	0.195006	-0.492443	0.09	0.11	1	2
Mlh3	0.835441	-0.492346	0.029	0.03	1	2
Ppp1r13b	0.0897339	-0.492328	0.204	0.234	1	2
Itgax	0.000526461	-0.491785	0.276	0.353	1	2
Haus2	0.541968	-0.491452	0.069	0.076	1	2
Meis1	0.0846001	-0.489571	0.067	0.093	1	2
Camsap1	0.403655	-0.489482	0.04	0.049	1	2
Rrm2b	0.0326036	-0.489451	0.114	0.155	1	2
Stoml1	0.665434	-0.489436	0.038	0.043	1	2
Ruvbl2	0.26851	-0.489131	0.095	0.111	1	2
Praf2	0.288816	-0.489057	0.032	0.044	1	2
Ints6	0.00307091	-0.488658	0.263	0.326	1	2
Inpp4b	0.0199973	-0.488645	0.223	0.275	1	2
Glmn	0.268735	-0.48859	0.044	0.057	1	2
Pbx3	0.0613546	-0.488404	0.194	0.233	1	2
Pdss1	0.666523	-0.48806	0.07	0.064	1	2
Fkbp7	0.739815	-0.48739	0.021	0.023	1	2
Ptger4	0.00332199	-0.487235	0.21	0.274	1	2
Pde4dip	0.163142	-0.487136	0.069	0.089	1	2
Ptar1	0.0968353	-0.4864	0.09	0.116	1	2
Siah1b	0.419985	-0.486307	0.011	0.017	1	2
Ttpal	0.203428	-0.486248	0.13	0.151	1	2
Tdrp	0.424437	-0.486186	0.011	0.017	1	2
Tbcel	0.32003	-0.486185	0.103	0.116	1	2
Tmem141	0.397042	-0.48582	0.027	0.035	1	2
Nup93	0.0562783	-0.485628	0.069	0.098	1	2
Rnf25	0.280691	-0.485307	0.059	0.074	1	2
Cpped1	0.635953	-0.48485	0.042	0.047	1	2
Zc3h12d	0.64446	-0.484724	0.069	0.074	1	2
Pusl1	0.351806	-0.48464	0.023	0.031	1	2
Abhd4	0.246218	-0.484546	0.027	0.038	1	2
Rrn3	0.306447	-0.484082	0.061	0.075	1	2
Gys1	0.423264	-0.483848	0.019	0.026	1	2
Abcg3	0.0298765	-0.483621	0.067	0.101	1	2
Mprip	0.0298688	-0.482871	0.171	0.218	1	2
Atm	0.0126682	-0.482808	0.118	0.166	1	2
Zfp773	0.741514	-0.482799	0.011	0.013	1	2
Rac3	0.792643	-0.48258	0.046	0.048	1	2
Lbhd1	0.320676	-0.482486	0.008	0.013	1	2
Atg7	0.194502	-0.482154	0.13	0.15	1	2
Tmem260	0.234668	-0.48184	0.078	0.096	1	2
Capn2	0.0550753	-0.481705	0.137	0.173	1	2
Stil	0.638952	-0.481529	0.008	0.01	1	2
Pigt	0.0407347	-0.481336	0.109	0.145	1	2
Polg2	0.00783049	-0.481235	0.225	0.286	1	2
Pdik1l	0.216413	-0.480959	0.027	0.039	1	2
Mllt1	0.434186	-0.480929	0.046	0.055	1	2
Efcab2	0.242259	-0.480446	0.023	0.034	1	2
Nudt18	0.201974	-0.479893	0.065	0.083	1	2
Slc4a7	0.0950762	-0.479594	0.267	0.299	1	2
Tsfm	0.0151914	-0.479398	0.143	0.191	1	2
Sesn1	1.28893e-05	-0.479253	0.465	0.556	0.213317	2
Hexim1	0.0629354	-0.479153	0.181	0.216	1	2
Gnpat	0.0314966	-0.478944	0.097	0.135	1	2
Gga3	0.349537	-0.477967	0.065	0.077	1	2
Ppan	0.112139	-0.477941	0.065	0.088	1	2
Dpy19l1	0.00447426	-0.477245	0.154	0.213	1	2
Arhgap39	0.0969551	-0.477208	0.04	0.06	1	2
Ap1s1	0.440272	-0.477191	0.084	0.094	1	2
Psmg3	0.177491	-0.477041	0.093	0.114	1	2
B3galnt2	0.453949	-0.47683	0.076	0.086	1	2
Btaf1	0.0117685	-0.476277	0.297	0.346	1	2
Gne	0.161489	-0.475975	0.055	0.074	1	2
Cdk10	0.27277	-0.475351	0.048	0.062	1	2
Hdac10	0.609986	-0.475265	0.013	0.017	1	2
Gpr68	0.270189	-0.475097	0.124	0.142	1	2
Klf16	0.18535	-0.475083	0.03	0.045	1	2
Bclaf3	0.0835821	-0.47504	0.13	0.162	1	2
S100a8	0.425632	-0.474536	0.036	0.045	1	2
4931414P19Rik	0.221836	-0.473998	0.011	0.02	1	2
Rwdd3	0.596552	-0.473946	0.015	0.019	1	2
Zfp287	0.425932	-0.473895	0.048	0.057	1	2
Dctn1	0.373314	-0.473656	0.107	0.119	1	2
Man2a2	0.389246	-0.473652	0.053	0.064	1	2
Dusp23	0.628953	-0.473342	0.04	0.045	1	2
Retreg1	0.0439845	-0.473124	0.179	0.221	1	2
Smad1	0.430733	-0.473044	0.09	0.101	1	2
Gm14325	0.119463	-0.472595	0.055	0.077	1	2
Klrg1	0.117721	-0.472523	0.122	0.15	1	2
Pole2	0.339962	-0.472387	0.029	0.038	1	2
Plekhb2	0.075143	-0.472368	0.05	0.074	1	2
Pde1c	0.667086	-0.472326	0.143	0.147	1	2
Orai2	0.0467785	-0.4718	0.16	0.201	1	2
Mlst8	0.0886722	-0.471308	0.011	0.025	1	2
Nampt	0.194662	-0.471055	0.097	0.117	1	2
Mta1	0.335404	-0.470978	0.093	0.107	1	2
Slc24a5	0.173119	-0.470791	0.023	0.036	1	2
Atp10a	0.00782502	-0.470777	0.301	0.364	1	2
Mlec	0.0637395	-0.470567	0.145	0.18	1	2
Aph1b	0.638952	-0.470325	0.008	0.01	1	2
Enox2	0.0458305	-0.470212	0.179	0.224	1	2
Ano10	0.237397	-0.470188	0.063	0.079	1	2
Cln3	0.034026	-0.469865	0.192	0.233	1	2
Ccdc15	0.447737	-0.469741	0.065	0.075	1	2
Nebl	0.0118982	-0.469436	0.122	0.169	1	2
Ints13	0.3287	-0.469296	0.069	0.082	1	2
Mars1	0.208355	-0.469149	0.051	0.067	1	2
Grpel2	0.697379	-0.469146	0.05	0.054	1	2
Auts2	0.641028	-0.469051	0.023	0.027	1	2
Zfp317	0.141985	-0.468477	0.069	0.091	1	2
Slc2a6	0.063684	-0.468354	0.04	0.064	1	2
Irak4	0.0972811	-0.468225	0.122	0.151	1	2
Pgap6	0.352775	-0.468219	0.023	0.031	1	2
Klc1	0.0710657	-0.467815	0.105	0.136	1	2
Etv6	0.000823606	-0.467744	0.438	0.509	1	2
Fam78b	0.660135	-0.467678	0.097	0.102	1	2
Slc30a5	0.109427	-0.467504	0.118	0.147	1	2
Pigl	0.423329	-0.467171	0.05	0.059	1	2
Eaf1	0.240298	-0.467155	0.08	0.097	1	2
Ska2	0.601546	-0.467009	0.027	0.031	1	2
Rnaseh2b	0.415781	-0.466982	0.059	0.069	1	2
Zbtb18	0.34384	-0.46689	0.029	0.038	1	2
Plaur	0.993214	-0.466215	0.019	0.019	1	2
Slc23a2	0.0246451	-0.465934	0.122	0.167	1	2
Tyw1	0.463918	-0.465875	0.086	0.095	1	2
Itsn1	0.0661205	-0.465831	0.059	0.086	1	2
Rwdd4a	0.106743	-0.46509	0.097	0.124	1	2
Plcb4	0.013764	-0.464743	0.147	0.197	1	2
Cep43	0.0984583	-0.464607	0.07	0.096	1	2
Sfswap	0.0732266	-0.46448	0.2	0.23	1	2
9930111J21Rik2	0.0644908	-0.464214	0.147	0.183	1	2
Sema4d	9.93882e-05	-0.464119	0.337	0.428	1	2
Smarcc2	0.0317193	-0.464011	0.158	0.202	1	2
Slc52a3	0.517698	-0.463931	0.01	0.013	1	2
Nmrk1	0.596525	-0.463739	0.046	0.051	1	2
Gse1	0.000769961	-0.463579	0.316	0.397	1	2
Rps18-ps6	0.415384	-0.463263	0.023	0.03	1	2
Ddi2	0.0874917	-0.462956	0.122	0.153	1	2
Adck2	0.417594	-0.462375	0.021	0.028	1	2
Cxcr6	0.0588798	-0.462236	0.063	0.092	1	2
Ccdc73	0.300898	-0.462108	0.048	0.06	1	2
Trabd	0.047637	-0.461936	0.173	0.211	1	2
Zhx3	0.706797	-0.461934	0.034	0.03	1	2
Pvrig	0.290839	-0.461776	0.03	0.041	1	2
Cpm	0.158525	-0.461463	0.015	0.027	1	2
Dnajc16	0.282019	-0.461338	0.013	0.021	1	2
Ebag9	0.147521	-0.461293	0.109	0.132	1	2
Zfp952	0.210249	-0.461166	0.057	0.074	1	2
Arhgef11	0.592882	-0.460978	0.015	0.019	1	2
Fam120c	0.0888023	-0.460536	0.069	0.095	1	2
Odc1	0.00174858	-0.460392	0.36	0.441	1	2
Gorab	0.239956	-0.460324	0.038	0.051	1	2
Zc3hc1	0.12712	-0.459837	0.057	0.078	1	2
Faah	0.264282	-0.459669	0.074	0.091	1	2
Slc35b2	0.158271	-0.459413	0.086	0.109	1	2
Dph6	0.141384	-0.459235	0.122	0.148	1	2
Nprl3	0.56508	-0.459213	0.04	0.046	1	2
Slc12a7	0.0769956	-0.458799	0.143	0.176	1	2
Mfn2	0.472124	-0.458788	0.05	0.058	1	2
Clec2i	0.00407244	-0.458536	0.175	0.24	1	2
Gins1	0.622023	-0.458386	0.025	0.029	1	2
Tle1	0.573229	-0.458228	0.019	0.023	1	2
Mgat5	1.03238e-06	-0.458191	0.535	0.64	0.0170859	2
Ubash3a	0.128166	-0.458118	0.084	0.109	1	2
Ankrd46	0.51128	-0.457532	0.04	0.047	1	2
Fam220a.1	0.742574	-0.457447	0.021	0.023	1	2
Rnf214	0.356383	-0.457405	0.103	0.116	1	2
Hyls1	0.905086	-0.457389	0.017	0.018	1	2
Wdr91	0.551764	-0.457144	0.044	0.05	1	2
Pcnx3	0.440831	-0.456826	0.076	0.086	1	2
Ppp1r3e	0.289165	-0.456822	0.015	0.023	1	2
Atp13a2	0.475676	-0.456692	0.036	0.044	1	2
Zfp512	0.0989624	-0.45634	0.251	0.281	1	2
Ptgr2	0.268069	-0.456216	0.103	0.12	1	2
Xpnpep3	0.345241	-0.456202	0.08	0.093	1	2
Snx30	0.514962	-0.455977	0.057	0.065	1	2
Dram2	0.0465242	-0.455589	0.086	0.12	1	2
Snx19	0.597987	-0.455534	0.053	0.059	1	2
Zfp991	0.462153	-0.455505	0.027	0.034	1	2
Phkb	0.0297188	-0.45547	0.135	0.179	1	2
Zfp592	0.0595684	-0.45529	0.2	0.235	1	2
Oprm1	0.0181812	-0.455018	0.16	0.207	1	2
Vps51	0.275591	-0.454813	0.076	0.092	1	2
B3galt6	0.458353	-0.454407	0.027	0.034	1	2
Smpd5	0.321505	-0.454099	0.078	0.092	1	2
Xdh	0.142149	-0.453169	0.204	0.228	1	2
Cyth3	0.219199	-0.453129	0.076	0.094	1	2
Cep57l1	0.0922197	-0.452915	0.061	0.085	1	2
H60b	0.390271	-0.452859	0.006	0.01	1	2
Atp7a	0.315598	-0.452785	0.103	0.119	1	2
H1f5	0.625375	-0.452583	0.025	0.029	1	2
Zmat4	0.226352	-0.452565	0.006	0.012	1	2
Cep164	0.183686	-0.452513	0.076	0.096	1	2
Mcrs1	0.32103	-0.452241	0.114	0.129	1	2
Fmo5	0.359171	-0.451938	0.04	0.05	1	2
4930523C07Rik	4.07827e-06	-0.4519	0.516	0.62	0.0674954	2
Tnfsf8	0.0794297	-0.45187	0.084	0.113	1	2
Slc30a6	0.351079	-0.451787	0.042	0.053	1	2
Rbm45	0.0777026	-0.451248	0.055	0.081	1	2
Gab2	0.192978	-0.451225	0.135	0.158	1	2
Ralgps1	0.589106	-0.451182	0.046	0.051	1	2
Phf11b	0.241628	-0.451141	0.107	0.125	1	2
Trub2	0.457833	-0.450839	0.04	0.048	1	2
D16Ertd472e	0.000464421	-0.449655	0.425	0.493	1	2
Ttyh3	0.0755001	-0.449523	0.067	0.094	1	2
Stat3	0.0452062	-0.449306	0.558	0.607	1	2
Dgat1	0.603973	-0.44919	0.2	0.205	1	2
Ocel1	0.275561	-0.449131	0.101	0.117	1	2
Dop1b	0.0449241	-0.448983	0.128	0.166	1	2
Knl1	0.149005	-0.448905	0.008	0.017	1	2
Dgcr6	0.840203	-0.448738	0.021	0.022	1	2
Abhd14b	0.214121	-0.448291	0.021	0.032	1	2
Cdc23	0.629197	-0.447876	0.048	0.053	1	2
Cbarp	0.440631	-0.447859	0.034	0.043	1	2
Cept1	0.0216056	-0.447794	0.154	0.201	1	2
Aurka	0.611304	-0.447664	0.013	0.017	1	2
Ahi1	0.181199	-0.447251	0.143	0.168	1	2
Fbxo47	0.829272	-0.447128	0.017	0.016	1	2
Lysmd4	0.150332	-0.447107	0.063	0.084	1	2
Pank1	0.221323	-0.447037	0.03	0.044	1	2
Cog4	0.170541	-0.446996	0.13	0.152	1	2
Galnt2	0.00063748	-0.446852	0.417	0.487	1	2
G6pdx	0.211183	-0.446624	0.061	0.078	1	2
Farsa	0.235388	-0.446619	0.107	0.125	1	2
Tma16	0.186341	-0.446598	0.038	0.054	1	2
Trim24	0.204762	-0.446164	0.16	0.181	1	2
Cfap68	0.242397	-0.446	0.091	0.11	1	2
Edem3	0.0982275	-0.445977	0.12	0.151	1	2
Ascc2	0.524206	-0.44565	0.08	0.088	1	2
Cbr1	0.267462	-0.445496	0.072	0.088	1	2
Casp8	0.0170375	-0.445328	0.354	0.398	1	2
Adam10	0.0813356	-0.445322	0.246	0.277	1	2
Chl1	0.153413	-0.445235	0.042	0.059	1	2
Tshz2	0.320676	-0.445038	0.008	0.013	1	2
Zfp951	0.680629	-0.445035	0.046	0.04	1	2
Cfap43	0.306801	-0.444757	0.023	0.032	1	2
C2cd3	0.240216	-0.444691	0.158	0.176	1	2
Snx8	0.595328	-0.444238	0.015	0.019	1	2
Zfp263	0.336677	-0.444215	0.082	0.095	1	2
Zfp382	0.633429	-0.444173	0.027	0.022	1	2
Aldh7a1	0.762903	-0.44417	0.019	0.021	1	2
H2-Aa	0.0515333	-0.444132	0.048	0.074	1	2
Gins2	0.115883	-0.444028	0.008	0.018	1	2
Fam151b	0.682675	-0.44361	0.017	0.02	1	2
Rtn4ip1	0.597369	-0.44334	0.015	0.019	1	2
Sestd1	0.645088	-0.443271	0.023	0.027	1	2
Atg13	0.106121	-0.443081	0.16	0.188	1	2
Supt3	0.0939849	-0.443018	0.137	0.169	1	2
Pygo2	0.736474	-0.442829	0.044	0.047	1	2
Shprh	0.152982	-0.442131	0.158	0.183	1	2
Enpp4	0.323741	-0.442085	0.101	0.115	1	2
Yars	0.0645007	-0.442075	0.12	0.153	1	2
Armcx1	0.87945	-0.441842	0.011	0.012	1	2
Osbpl2	0.0165451	-0.441839	0.07	0.11	1	2
Iffo1	0.113844	-0.441177	0.055	0.077	1	2
Nfe2l2	0.00922071	-0.441113	0.402	0.453	1	2
Enpp1	0.390797	-0.440922	0.069	0.081	1	2
Amdhd2	0.100045	-0.440412	0.059	0.083	1	2
Naf1	0.231167	-0.440345	0.046	0.06	1	2
Tmem140	0.395172	-0.439705	0.065	0.076	1	2
H2bc8	0.989688	-0.439177	0.057	0.056	1	2
Orc5	0.230716	-0.438736	0.097	0.116	1	2
Ermard	0.459874	-0.438647	0.067	0.076	1	2
Ncald	0.0592782	-0.438427	0.217	0.252	1	2
1700037C18Rik	0.281357	-0.438263	0.042	0.055	1	2
Lhfpl2	0.567955	-0.438176	0.01	0.007	1	2
Appl2	0.0472416	-0.43766	0.063	0.093	1	2
Dlgap5	0.981448	-0.437599	0.013	0.013	1	2
Nudt13	0.179402	-0.437315	0.046	0.063	1	2
Traf3ip1	0.478366	-0.437309	0.023	0.029	1	2
Cacnb4	0.871047	-0.437285	0.013	0.012	1	2
Zfp467	0.513335	-0.437258	0.013	0.018	1	2
Zfp59	0.876081	-0.437238	0.011	0.012	1	2
Nme7	0.251766	-0.436459	0.07	0.087	1	2
Ly6e	9.52595e-07	-0.436168	0.653	0.738	0.0157654	2
Exosc2	0.302328	-0.436165	0.051	0.065	1	2
Usp25	0.00185032	-0.436131	0.419	0.491	1	2
Gba2	0.200662	-0.436071	0.032	0.046	1	2
Marveld2	0.382847	-0.435817	0.036	0.046	1	2
Vipr1	0.430612	-0.435787	0.015	0.021	1	2
Kcnh6	0.352713	-0.435612	0.015	0.022	1	2
Polr3e	0.778096	-0.435058	0.053	0.056	1	2
Gbp2	0.239098	-0.43498	0.048	0.063	1	2
1700020L24Rik	0.439272	-0.434733	0.032	0.04	1	2
Pard6g	0.120231	-0.434723	0.013	0.026	1	2
Slc35d1	0.429643	-0.434268	0.074	0.085	1	2
Csrp1	0.151889	-0.434114	0.196	0.224	1	2
D130040H23Rik	0.103275	-0.434064	0.103	0.13	1	2
Map4k1	0.401083	-0.433935	0.067	0.078	1	2
Ung	0.601042	-0.433733	0.036	0.041	1	2
Rnpepl1	0.405848	-0.433627	0.086	0.097	1	2
Slc38a9	0.323103	-0.43355	0.116	0.132	1	2
Ticam1	0.731195	-0.43303	0.03	0.034	1	2
Zfp324	0.473185	-0.432305	0.017	0.012	1	2
Gypc	0.402485	-0.43221	0.027	0.035	1	2
Snx9	0.28893	-0.432067	0.09	0.106	1	2
Cep85l	0.128079	-0.432045	0.069	0.092	1	2
Thumpd3	0.0844183	-0.431302	0.09	0.119	1	2
Plcl2	0.00042659	-0.431113	0.4	0.481	1	2
R3hcc1l	0.0266564	-0.43031	0.196	0.244	1	2
Nrros	0.0439891	-0.429942	0.183	0.226	1	2
Prkce	0.0561429	-0.429897	0.185	0.224	1	2
Hgsnat	0.914465	-0.42954	0.204	0.195	1	2
Dtd2	0.712232	-0.429474	0.048	0.051	1	2
Lgals3	0.247302	-0.42915	0.12	0.141	1	2
Hoxa3	0.843708	-0.428956	0.013	0.015	1	2
Ubr5	0.00489003	-0.428891	0.255	0.314	1	2
Ptpn5	0.874959	-0.428763	0.011	0.012	1	2
Icosl	0.922266	-0.428672	0.03	0.029	1	2
Clcc1	0.314176	-0.428053	0.095	0.11	1	2
Klhl42	0.566887	-0.427968	0.021	0.026	1	2
Poldip2	0.518056	-0.427709	0.05	0.057	1	2
Prkn	0.767726	-0.427446	0.061	0.064	1	2
Tmx4	0.859492	-0.427384	0.265	0.255	1	2
Top3a	0.794332	-0.427365	0.046	0.048	1	2
Mllt6	0.0125735	-0.427311	0.145	0.197	1	2
Man1c1	0.0772935	-0.427268	0.122	0.155	1	2
Pnpo	0.318204	-0.427262	0.053	0.066	1	2
Nek9	0.258505	-0.42724	0.122	0.141	1	2
Cdc25a	0.572147	-0.427235	0.019	0.023	1	2
Fut11	0.210704	-0.427176	0.053	0.069	1	2
Ms4a6b	7.46023e-05	-0.42705	0.36	0.463	1	2
Elp3	0.817298	-0.426967	0.059	0.062	1	2
Nav1	0.561719	-0.426915	0.034	0.04	1	2
Pdlim7	0.322675	-0.426527	0.051	0.064	1	2
Podnl1	0.852532	-0.426473	0.034	0.036	1	2
Stard5	0.206414	-0.426461	0.08	0.1	1	2
Grik5	0.513731	-0.426104	0.013	0.018	1	2
Zup1	0.0209398	-0.424766	0.192	0.244	1	2
Baz1a	0.00033289	-0.424631	0.43	0.522	1	2
Chek2	0.638952	-0.424614	0.008	0.01	1	2
Leng9	0.573532	-0.424459	0.093	0.1	1	2
Atxn7l1	0.0123328	-0.424382	0.248	0.302	1	2
Mgat4b	0.16097	-0.42405	0.133	0.16	1	2
Cdk6	0.280047	-0.423907	0.232	0.254	1	2
Osbpl11	0.23964	-0.423857	0.091	0.11	1	2
Tiparp	0.225827	-0.423841	0.234	0.255	1	2
Parp11	0.133069	-0.423685	0.076	0.1	1	2
Mipep	0.607732	-0.423387	0.046	0.051	1	2
Dapk1	0.767498	-0.423279	0.019	0.021	1	2
Prpsap2	0.615082	-0.42323	0.084	0.089	1	2
Harbi1	0.344528	-0.422841	0.011	0.018	1	2
Mettl27	0.569978	-0.422635	0.021	0.026	1	2
Zbtb4	0.33108	-0.422629	0.09	0.104	1	2
BC049715	0.255718	-0.422235	0.029	0.04	1	2
Cdc14a	0.166478	-0.421943	0.187	0.211	1	2
Vegfc	0.060274	-0.42175	0.229	0.266	1	2
Simc1	0.194978	-0.421488	0.141	0.163	1	2
Abcc4	0.520871	-0.421422	0.105	0.114	1	2
Nbr1	0.370937	-0.421296	0.168	0.179	1	2
Kcnip3	0.00924443	-0.421217	0.259	0.322	1	2
Ncoa3	0.0105383	-0.42108	0.185	0.243	1	2
Cbwd1	0.30335	-0.420533	0.194	0.208	1	2
Ing4	0.105149	-0.420033	0.177	0.206	1	2
Rgs9	0.877765	-0.419695	0.011	0.012	1	2
Zfp748	0.441327	-0.419312	0.046	0.055	1	2
L3mbtl3	0.226552	-0.418545	0.137	0.159	1	2
Aldh3a2	0.120663	-0.418483	0.053	0.075	1	2
Dhfr	0.350984	-0.417642	0.015	0.022	1	2
Casp7	0.376856	-0.417064	0.078	0.091	1	2
Siah1a	0.0639983	-0.417039	0.118	0.152	1	2
Ttll4	0.401789	-0.416924	0.063	0.074	1	2
Zfp609	0.747635	-0.41689	0.046	0.049	1	2
Sipa1l1	0.00201721	-0.416517	0.415	0.485	1	2
Camk4	0.247348	-0.41587	0.135	0.155	1	2
Zfp316	0.764489	-0.415807	0.01	0.011	1	2
Fndc3a	0.00342403	-0.41572	0.362	0.433	1	2
Xrcc1	0.454613	-0.415162	0.042	0.05	1	2
Selp	0.666508	-0.415022	0.036	0.04	1	2
Eeig1	0.0134203	-0.41495	0.221	0.271	1	2
Prkra	0.911685	-0.414619	0.053	0.054	1	2
Acsl5	0.122666	-0.41392	0.164	0.194	1	2
Recql	0.253921	-0.413765	0.08	0.097	1	2
Xndc1	0.40822	-0.41339	0.025	0.032	1	2
Cep170	0.595675	-0.413218	0.103	0.111	1	2
Klhdc1	0.507782	-0.412637	0.084	0.093	1	2
Sf3a1	0.130336	-0.412475	0.112	0.14	1	2
Fam177a	0.77223	-0.412067	0.027	0.029	1	2
Cyp39a1	0.417393	-0.412057	0.01	0.015	1	2
Eci2	0.0137075	-0.411746	0.107	0.155	1	2
Tnfrsf10b	0.510966	-0.411348	0.013	0.018	1	2
Wars2	0.0781499	-0.41112	0.107	0.139	1	2
Ggct	0.0804248	-0.410842	0.202	0.236	1	2
Fam83d	0.639533	-0.410717	0.008	0.01	1	2
Dnajb13	0.823176	-0.410545	0.011	0.01	1	2
Zpr1	0.152005	-0.410358	0.107	0.131	1	2
Spata32	0.878327	-0.410016	0.011	0.012	1	2
Gmppb	0.368893	-0.409743	0.051	0.063	1	2
Nin	0.0155066	-0.409516	0.263	0.318	1	2
Zfp445	0.0477531	-0.409424	0.158	0.198	1	2
Cuedc1	0.19615	-0.409144	0.204	0.226	1	2
Acss1	0.334929	-0.408437	0.084	0.098	1	2
Cdk5rap1	0.413776	-0.408179	0.112	0.124	1	2
Zfp937	0.255576	-0.407993	0.023	0.034	1	2
Tmem63a	0.446208	-0.407673	0.061	0.07	1	2
Rprd2	0.194025	-0.407577	0.204	0.225	1	2
Nrip1	0.00578417	-0.407574	0.337	0.394	1	2
Irf8	0.0114768	-0.407511	0.528	0.573	1	2
Zfp266	0.180159	-0.406755	0.152	0.174	1	2
Dele1	0.43466	-0.406706	0.05	0.059	1	2
Gpr174	0.0279921	-0.406599	0.31	0.353	1	2
Topbp1	0.183137	-0.406475	0.179	0.201	1	2
Tmem39a	0.0827171	-0.406475	0.128	0.159	1	2
St6galnac5	0.748498	-0.406155	0.021	0.023	1	2
Zfp955b	0.479843	-0.405997	0.046	0.054	1	2
Ilrun	0.00639821	-0.405963	0.202	0.265	1	2
Limk1	0.116165	-0.405873	0.055	0.077	1	2
Poglut3	0.510533	-0.405341	0.008	0.011	1	2
Mndal	5.16244e-05	-0.405239	0.651	0.698	0.854384	2
Srp54b	0.406843	-0.405148	0.008	0.012	1	2
Klhdc10	0.331946	-0.404946	0.122	0.139	1	2
Ube2w	0.0121893	-0.40434	0.221	0.277	1	2
Ank	0.111974	-0.404263	0.131	0.16	1	2
Lpcat2	0.423132	-0.404039	0.017	0.023	1	2
H1f1	0.637963	-0.404014	0.034	0.039	1	2
Panx1	0.191547	-0.403919	0.158	0.18	1	2
Zfp764	0.633166	-0.403848	0.01	0.012	1	2
Egln1	0.0724772	-0.403766	0.185	0.217	1	2
Aagab	0.0914317	-0.403672	0.12	0.15	1	2
Crcp	0.480006	-0.403554	0.107	0.116	1	2
Eea1	0.0450903	-0.402853	0.286	0.321	1	2
Atf6b	0.84169	-0.402825	0.07	0.072	1	2
Erg28	0.273449	-0.402715	0.152	0.171	1	2
Cwf19l1	0.298934	-0.402563	0.025	0.035	1	2
Dnaaf9	0.860261	-0.40252	0.118	0.12	1	2
Il15	0.356339	-0.402227	0.065	0.077	1	2
Rnf220	0.0502792	-0.402207	0.16	0.197	1	2
Pald1	0.504786	-0.402148	0.032	0.039	1	2
Acp6	0.462834	-0.401802	0.027	0.034	1	2
Snx32	0.176704	-0.401306	0.021	0.034	1	2
Ipo8	0.0422451	-0.401259	0.114	0.153	1	2
Ddb1	0.046597	-0.400827	0.126	0.164	1	2
Tfdp2	0.121515	-0.400784	0.128	0.157	1	2
Khnyn	0.0972559	-0.400782	0.135	0.168	1	2
Phactr4	0.0993361	-0.400692	0.143	0.174	1	2
2210408I21Rik	0.744575	-0.400669	0.038	0.041	1	2
Pus7l	0.662906	-0.400441	0.019	0.022	1	2
Ifi203	0.000138085	-0.399781	0.577	0.631	1	2
Secisbp2l	0.112154	-0.399764	0.147	0.172	1	2
Trip11	0.0283428	-0.399669	0.377	0.412	1	2
Tspan31	0.401518	-0.399519	0.025	0.032	1	2
Sfi1	0.270318	-0.399416	0.164	0.181	1	2
Yae1d1	0.657383	-0.399386	0.063	0.068	1	2
Pigu	0.384277	-0.399382	0.078	0.091	1	2
Zfhx2	0.182643	-0.399182	0.12	0.143	1	2
Padi4	0.637858	-0.399109	0.023	0.027	1	2
Prdm10	0.111148	-0.399026	0.086	0.112	1	2
Trim68	0.419554	-0.398819	0.019	0.026	1	2
Plcb2	0.402551	-0.398705	0.057	0.068	1	2
Atad2	0.130657	-0.398641	0.2	0.228	1	2
Klf12	0.00633187	-0.398519	0.446	0.494	1	2
Mbd4	0.352559	-0.398078	0.029	0.038	1	2
Crim1	0.00370148	-0.397863	0.408	0.455	1	2
Lap3	0.552898	-0.397756	0.072	0.079	1	2
Cerk	0.00734	-0.397662	0.284	0.341	1	2
Ppp1r15b	0.301608	-0.397462	0.133	0.15	1	2
Ift74	0.190275	-0.397443	0.013	0.023	1	2
Nfx1	0.0272048	-0.397285	0.341	0.384	1	2
Fabp5	0.562704	-0.396991	0.036	0.03	1	2
Pde5a	0.856486	-0.396982	0.046	0.044	1	2
Wdr11	0.491792	-0.396658	0.021	0.027	1	2
Ccnd2	3.35708e-05	-0.396404	0.53	0.623	0.555596	2
Ube2cbp	0.928346	-0.396341	0.027	0.026	1	2
Brd2	0.0344352	-0.396122	0.37	0.406	1	2
Asb7	0.621714	-0.396097	0.034	0.039	1	2
Gm3604	0.918721	-0.395614	0.01	0.009	1	2
Smagp	0.294932	-0.395541	0.015	0.023	1	2
Herpud2	0.0663646	-0.395343	0.16	0.197	1	2
Alas1	0.519295	-0.395242	0.029	0.035	1	2
Agpat1	0.323948	-0.395085	0.053	0.066	1	2
Hscb	0.115487	-0.394958	0.139	0.167	1	2
8030462N17Rik	0.105626	-0.394799	0.185	0.217	1	2
Fmnl2	0.514571	-0.394129	0.008	0.011	1	2
Wnt5b	0.39522	-0.393939	0.015	0.01	1	2
Wdtc1	0.186081	-0.393549	0.08	0.101	1	2
Rab3gap2	0.0349498	-0.393361	0.164	0.207	1	2
Rap2a	0.0899671	-0.393256	0.143	0.174	1	2
Ulk3	0.402982	-0.393252	0.027	0.035	1	2
Rab31	0.251915	-0.393132	0.069	0.085	1	2
Nol6	0.67095	-0.393125	0.046	0.05	1	2
Tpk1	0.104181	-0.392689	0.217	0.249	1	2
Dcaf10	0.516288	-0.392683	0.107	0.115	1	2
Ireb2	0.149113	-0.392398	0.116	0.141	1	2
Cers6	0.00288078	-0.39205	0.484	0.519	1	2
Marchf3	0.0423701	-0.391918	0.215	0.258	1	2
Ppil6	0.684549	-0.39163	0.017	0.02	1	2
Mapkbp1	0.989042	-0.39162	0.025	0.025	1	2
Vps33a	0.136132	-0.39158	0.086	0.11	1	2
Letmd1	0.388146	-0.391443	0.055	0.066	1	2
Mipol1	0.201292	-0.390943	0.152	0.177	1	2
Usp38	0.0371706	-0.390701	0.257	0.301	1	2
Tbc1d7	0.350509	-0.390553	0.013	0.02	1	2
Eps15l1	0.124214	-0.390297	0.173	0.201	1	2
Gpn1	0.0421676	-0.390048	0.059	0.089	1	2
Mib1	0.111109	-0.389804	0.135	0.166	1	2
Sdccag8	0.060118	-0.389397	0.17	0.208	1	2
Nol11	0.507775	-0.389356	0.139	0.147	1	2
Serpini1	0.115644	-0.389209	0.095	0.122	1	2
Rcbtb1	0.54747	-0.388698	0.16	0.167	1	2
Leng8	0.0401804	-0.388691	0.211	0.252	1	2
Tgfb3	0.482545	-0.388389	0.023	0.029	1	2
Gna12	0.365905	-0.388176	0.088	0.101	1	2
Tpcn2	0.469532	-0.388084	0.027	0.034	1	2
Dhodh	0.594257	-0.388002	0.038	0.044	1	2
Pus7	0.843659	-0.387747	0.042	0.039	1	2
Stambpl1	0.0305016	-0.387506	0.152	0.197	1	2
Dedd	0.559123	-0.38749	0.067	0.074	1	2
Ibtk	0.238525	-0.387481	0.08	0.097	1	2
Ppp1r3b	0.794317	-0.387363	0.032	0.035	1	2
Gk	0.390452	-0.387079	0.032	0.041	1	2
Itpk1	0.0140066	-0.386784	0.269	0.323	1	2
Ppp1r21	0.0012795	-0.386637	0.149	0.22	1	2
Rps10	4.62027e-14	-0.386621	0.912	0.947	7.64654e-10	2
Irf7	0.253991	-0.386241	0.177	0.198	1	2
Tmem107	0.621272	-0.38618	0.011	0.015	1	2
Crtap	0.425325	-0.386083	0.015	0.021	1	2
Klhl3	0.920012	-0.386039	0.01	0.009	1	2
Psmd5	0.306554	-0.38599	0.139	0.155	1	2
Lonrf3	0.867233	-0.385823	0.013	0.012	1	2
Elk4	0.041607	-0.385809	0.339	0.378	1	2
Tbkbp1	0.41911	-0.385764	0.019	0.026	1	2
Pdpk1	0.113234	-0.384943	0.284	0.308	1	2
Relb	0.0106818	-0.384552	0.326	0.386	1	2
Trp53inp2	0.303631	-0.384172	0.147	0.162	1	2
Prxl2c	0.0972813	-0.384133	0.141	0.171	1	2
Abcc1	0.10405	-0.383467	0.109	0.138	1	2
Tsr2	0.725669	-0.383442	0.072	0.076	1	2
C2cd2	0.317735	-0.38341	0.053	0.066	1	2
Vopp1	0.207142	-0.383033	0.185	0.208	1	2
Kbtbd3	0.0956402	-0.382944	0.059	0.083	1	2
Slc39a10	0.214122	-0.382894	0.107	0.126	1	2
Rpp38	0.873666	-0.382635	0.034	0.036	1	2
Tent5d	0.765067	-0.38257	0.01	0.011	1	2
Setdb2	0.471481	-0.382406	0.078	0.088	1	2
Ubr7	0.103519	-0.382258	0.097	0.125	1	2
Ccnc	0.102721	-0.382228	0.204	0.236	1	2
Tyw5	0.515021	-0.382212	0.082	0.091	1	2
Rab29	0.544863	-0.382096	0.051	0.058	1	2
Spg7	0.553788	-0.381984	0.122	0.131	1	2
Shc1	0.130557	-0.381548	0.114	0.141	1	2
Ftsj1	0.879524	-0.380997	0.04	0.041	1	2
Rbm12	0.433124	-0.380762	0.034	0.043	1	2
Trappc14	0.432457	-0.380736	0.048	0.057	1	2
Slc25a43	0.566544	-0.380717	0.021	0.026	1	2
Ap2a1	0.495458	-0.380614	0.095	0.105	1	2
Surf6	0.212859	-0.3805	0.076	0.095	1	2
Gbp4	0.0100815	-0.38042	0.21	0.267	1	2
Tef	0.396105	-0.380407	0.046	0.056	1	2
Dse	0.433554	-0.380186	0.112	0.124	1	2
Rnaseh2a	0.293952	-0.380126	0.078	0.094	1	2
H2bc6	0.240045	-0.379859	0.097	0.115	1	2
1700010I14Rik	0.51294	-0.379333	0.013	0.018	1	2
Def6	0.0103448	-0.379273	0.276	0.333	1	2
D030056L22Rik	0.256575	-0.379202	0.072	0.088	1	2
C2cd5	0.0428497	-0.378545	0.192	0.234	1	2
Wapl	0.000228519	-0.378382	0.383	0.475	1	2
Disp1	0.250127	-0.378358	0.07	0.087	1	2
Arl13b	0.773033	-0.378032	0.095	0.098	1	2
Inpp5e	0.637858	-0.376863	0.023	0.027	1	2
Smco4	0.433062	-0.376828	0.048	0.057	1	2
Ifih1	0.303153	-0.376709	0.032	0.044	1	2
Fkbp5	0.00905096	-0.37639	0.206	0.268	1	2
Otud7b	0.459539	-0.37587	0.12	0.131	1	2
Odf2l	0.683367	-0.375864	0.036	0.04	1	2
Tmem230	0.11608	-0.375814	0.158	0.186	1	2
D17H6S53E	0.503294	-0.375622	0.017	0.022	1	2
Rbm18	0.121637	-0.375482	0.105	0.133	1	2
Gpsm1	0.748804	-0.375378	0.055	0.058	1	2
Rabl6	0.19712	-0.375317	0.101	0.122	1	2
Dpy19l3	0.362076	-0.375256	0.051	0.063	1	2
C1galt1c1	0.0968105	-0.375166	0.069	0.094	1	2
Nrbf2	0.124625	-0.37513	0.168	0.198	1	2
Piga	0.666571	-0.374996	0.038	0.043	1	2
Vezt	0.613117	-0.37465	0.069	0.075	1	2
Apc	0.0610735	-0.374572	0.284	0.321	1	2
Arhgef4	0.652722	-0.37448	0.021	0.025	1	2
St3gal1	0.0996374	-0.374464	0.229	0.26	1	2
Ckap5	0.209624	-0.374246	0.156	0.178	1	2
Rasgef1b	0.083017	-0.37394	0.124	0.154	1	2
Dut	0.224905	-0.3739	0.15	0.171	1	2
Ttc28	0.266618	-0.373868	0.21	0.228	1	2
Eva1b	0.524958	-0.373797	0.067	0.075	1	2
Zfp268	0.441957	-0.373526	0.095	0.106	1	2
Usp4	0.0707338	-0.373525	0.175	0.21	1	2
Abcb10	0.867382	-0.373495	0.034	0.036	1	2
Ly96	0.907293	-0.373486	0.036	0.037	1	2
Polr1has	0.303111	-0.373409	0.025	0.035	1	2
Stk10	0.000731835	-0.372901	0.491	0.576	1	2
S100a4	0.101724	-0.372739	0.251	0.282	1	2
Hivep1	0.00454872	-0.37273	0.27	0.341	1	2
Sytl2	0.0123878	-0.372592	0.269	0.323	1	2
Ryr3	0.796929	-0.372591	0.017	0.019	1	2
Ada	0.385862	-0.372389	0.03	0.039	1	2
Shld2	0.261553	-0.37227	0.057	0.073	1	2
Znrf1	0.350297	-0.371706	0.24	0.249	1	2
Smn1	0.414912	-0.371466	0.099	0.111	1	2
Smim24	0.26963	-0.371263	0.042	0.055	1	2
Abcb1b	0.830632	-0.371187	0.21	0.2	1	2
Prr5	0.40085	-0.371041	0.053	0.064	1	2
Mef2c	0.00535926	-0.371017	0.312	0.379	1	2
Abca2	0.206865	-0.371011	0.088	0.107	1	2
Cog7	0.0560403	-0.370475	0.034	0.057	1	2
Smpdl3b	0.0556395	-0.370457	0.006	0.018	1	2
Scyl1	0.254598	-0.370304	0.053	0.068	1	2
Bcl3	0.149647	-0.37019	0.091	0.115	1	2
Ttll7	0.872683	-0.36998	0.013	0.012	1	2
Telo2	0.642055	-0.369774	0.032	0.037	1	2
Ttc14	0.000345748	-0.369629	0.333	0.426	1	2
Ncdn	0.680714	-0.369617	0.051	0.046	1	2
Tars	0.521249	-0.369339	0.13	0.139	1	2
Phf12	0.0700159	-0.369165	0.196	0.233	1	2
Rhot1	0.178852	-0.368962	0.13	0.152	1	2
Nelfe	0.334328	-0.36888	0.084	0.098	1	2
Aste1	0.694636	-0.368839	0.059	0.064	1	2
Kmt5b	0.0239796	-0.368495	0.248	0.293	1	2
Itch	0.0241244	-0.368339	0.366	0.424	1	2
Inpp5b	0.161808	-0.368329	0.152	0.18	1	2
R3hdm2	0.101063	-0.368022	0.251	0.284	1	2
Gnl2	0.335331	-0.367454	0.105	0.12	1	2
Abhd5	0.559613	-0.367437	0.07	0.078	1	2
Kctd9	0.339701	-0.36736	0.036	0.047	1	2
Ehmt1	0.00947341	-0.367235	0.183	0.24	1	2
Stard7	0.681892	-0.367098	0.101	0.105	1	2
Frs2	0.0247885	-0.366641	0.21	0.26	1	2
Nfkbie	0.127884	-0.366611	0.246	0.272	1	2
Blzf1	0.191405	-0.365984	0.038	0.054	1	2
Polr2a	0.000339412	-0.365876	0.669	0.738	1	2
Wdfy2	0.254743	-0.365377	0.08	0.098	1	2
Atp13a1	0.613096	-0.365346	0.072	0.079	1	2
Cdyl2	0.0613788	-0.36532	0.286	0.324	1	2
Ppp1r3f	0.743607	-0.365112	0.011	0.013	1	2
Pik3r2	0.584977	-0.365073	0.017	0.021	1	2
Lrrc57	0.378856	-0.364983	0.061	0.073	1	2
Ippk	0.383267	-0.364802	0.034	0.044	1	2
Dnah8	0.387891	-0.364734	0.088	0.101	1	2
Ccnyl1	0.749427	-0.364128	0.072	0.076	1	2
Ebpl	0.337923	-0.363999	0.105	0.121	1	2
Rasl12	0.546798	-0.36382	0.069	0.077	1	2
3110082I17Rik	0.367313	-0.363661	0.051	0.063	1	2
Syne1	0.0335615	-0.363648	0.147	0.189	1	2
Golm2	0.836666	-0.363634	0.027	0.025	1	2
Zfp146	0.364473	-0.36358	0.038	0.048	1	2
Efl1	0.680444	-0.363417	0.162	0.164	1	2
Kctd16	0.813757	-0.363166	0.011	0.01	1	2
Susd3	0.651364	-0.363101	0.03	0.035	1	2
Mtrf1l	0.380155	-0.363084	0.076	0.088	1	2
Mcm5	0.343295	-0.362858	0.069	0.082	1	2
Rnf38	0.225545	-0.362565	0.215	0.236	1	2
Top3b	0.705603	-0.36242	0.122	0.124	1	2
Pmm2	0.0920415	-0.3623	0.141	0.173	1	2
Dus2	0.678859	-0.362207	0.08	0.085	1	2
Dmac2	0.667557	-0.361793	0.099	0.104	1	2
Slc24a3	0.292982	-0.361777	0.017	0.026	1	2
Anapc15	0.290258	-0.361742	0.08	0.096	1	2
Cyfip2	0.000156064	-0.361675	0.533	0.613	1	2
B3galt5	0.35719	-0.361498	0.017	0.025	1	2
Tfe3	0.137862	-0.361443	0.038	0.056	1	2
Sh3bp5l	0.63738	-0.36128	0.034	0.039	1	2
Ddx11	0.78305	-0.361235	0.053	0.056	1	2
Polr3c	0.317514	-0.361225	0.124	0.141	1	2
Strn4	0.678978	-0.361193	0.072	0.077	1	2
Tmem9b	0.40228	-0.361156	0.162	0.173	1	2
Mepce	0.484227	-0.36113	0.141	0.15	1	2
Plcg2	0.0631602	-0.360993	0.316	0.355	1	2
Spatc1	0.283163	-0.360662	0.044	0.057	1	2
Mttp	0.301222	-0.360659	0.03	0.041	1	2
Phtf1	0.073298	-0.3605	0.097	0.13	1	2
Msto1	0.829547	-0.359826	0.036	0.034	1	2
Mga	0.0199478	-0.359598	0.179	0.227	1	2
Mterf1a	0.136007	-0.359568	0.097	0.123	1	2
Snap47	0.716594	-0.359506	0.053	0.057	1	2
Zfp131	0.141496	-0.359376	0.185	0.213	1	2
Gabarapl1	0.577627	-0.359017	0.078	0.085	1	2
1110059G10Rik	0.0810332	-0.358804	0.095	0.125	1	2
Ctnna1	0.0617548	-0.358629	0.143	0.179	1	2
Pex6	0.76919	-0.358462	0.061	0.064	1	2
Jkamp	0.228487	-0.358282	0.105	0.124	1	2
Zfand4	0.687467	-0.357843	0.017	0.02	1	2
Wbp4	0.0442793	-0.357814	0.19	0.235	1	2
Atxn1	0.0218024	-0.357799	0.339	0.393	1	2
Dyrk3	0.91614	-0.357475	0.01	0.009	1	2
2310033P09Rik	0.470104	-0.357389	0.192	0.202	1	2
Tfdp1	0.270019	-0.35727	0.072	0.088	1	2
Tbxa2r	0.536476	-0.357136	0.027	0.032	1	2
N4bp2l1	0.49886	-0.357098	0.101	0.111	1	2
Zfp994	0.303242	-0.357031	0.082	0.097	1	2
Fbxo7	0.145597	-0.356876	0.118	0.144	1	2
Ranbp10	0.0467319	-0.356623	0.135	0.174	1	2
Rab40c	0.305999	-0.356323	0.067	0.081	1	2
Trib2	0.706229	-0.356318	0.048	0.043	1	2
Cyb561a3	0.511208	-0.356295	0.042	0.049	1	2
Dnajb12	0.204446	-0.356288	0.078	0.097	1	2
Eif2b3	0.522741	-0.356111	0.084	0.093	1	2
Arhgef3	0.000375861	-0.356009	0.608	0.674	1	2
Nup153	0.0433992	-0.355849	0.356	0.389	1	2
Setd5	0.0111923	-0.35581	0.383	0.436	1	2
Parp14	0.0953985	-0.355712	0.179	0.213	1	2
Gart	0.526842	-0.355697	0.057	0.065	1	2
Slc30a9	0.234938	-0.355684	0.137	0.159	1	2
Dffa	0.162592	-0.355658	0.034	0.05	1	2
Zfp318	0.140767	-0.35526	0.09	0.113	1	2
Tex30	0.592659	-0.354893	0.145	0.152	1	2
Mtmr9	0.558813	-0.354545	0.044	0.05	1	2
Foxo4	0.94309	-0.354479	0.032	0.031	1	2
Phkg2	0.515173	-0.354337	0.133	0.142	1	2
Ppp1r16b	0.00227188	-0.354336	0.448	0.522	1	2
Cdh24	0.872775	-0.354235	0.019	0.02	1	2
Sp100	0.000272297	-0.354198	0.653	0.691	1	2
Cd69	0.00960606	-0.35403	0.49	0.551	1	2
Ipo9	0.213833	-0.353807	0.091	0.111	1	2
Epm2aip1	0.248018	-0.353758	0.116	0.136	1	2
Slc35b4	0.355781	-0.353694	0.09	0.103	1	2
Zfp160	0.114855	-0.353686	0.067	0.091	1	2
Phlpp1	0.415576	-0.353641	0.187	0.2	1	2
Izumo4	0.317088	-0.353636	0.078	0.093	1	2
Cnot3	0.0487333	-0.353632	0.255	0.298	1	2
Gtpbp3	0.872764	-0.352754	0.038	0.036	1	2
Zfyve28	0.925882	-0.352546	0.015	0.015	1	2
Sirt5	0.466924	-0.352097	0.04	0.048	1	2
Psmd7	0.0891318	-0.351734	0.255	0.287	1	2
Scyl2	0.231724	-0.351696	0.171	0.191	1	2
C330018D20Rik	0.801595	-0.351688	0.032	0.035	1	2
Slc25a51	0.0573731	-0.35135	0.107	0.141	1	2
Zfp169	0.467408	-0.351308	0.051	0.06	1	2
2810459M11Rik	0.380759	-0.351153	0.067	0.078	1	2
Gm7694	0.389338	-0.350859	0.006	0.01	1	2
Gstt2	0.554446	-0.350718	0.084	0.092	1	2
Ccdc166	0.590348	-0.350658	0.017	0.021	1	2
Blmh	0.327585	-0.350646	0.17	0.183	1	2
Wdr12	0.95694	-0.350639	0.074	0.072	1	2
Epb41	0.0171203	-0.350563	0.461	0.502	1	2
Ube2t	0.668035	-0.350362	0.053	0.058	1	2
Klrc3	0.0853074	-0.350296	0.175	0.209	1	2
Lrrc41	0.391088	-0.350175	0.059	0.07	1	2
Lrrc8c	0.000741558	-0.349918	0.47	0.55	1	2
Plpp6	0.206689	-0.349684	0.053	0.07	1	2
Pip4k2a	0.0738346	-0.349365	0.383	0.414	1	2
Scn1b	0.579015	-0.349205	0.019	0.023	1	2
Ccdc66	0.297218	-0.348934	0.053	0.067	1	2
Itk	0.00215579	-0.348831	0.545	0.602	1	2
Ap3m2	0.117949	-0.348821	0.055	0.077	1	2
Foxd2	0.638952	-0.34876	0.008	0.01	1	2
Hhat	0.549341	-0.348607	0.036	0.043	1	2
Klhl12	0.228964	-0.348586	0.152	0.177	1	2
Tnrc18	0.0574408	-0.348497	0.179	0.218	1	2
Rngtt	0.00690727	-0.34835	0.326	0.393	1	2
Bcas3	0.0072099	-0.348291	0.335	0.393	1	2
Togaram2	0.882821	-0.348083	0.011	0.012	1	2
Astl	0.875008	-0.34773	0.027	0.028	1	2
Llgl2	0.295392	-0.347486	0.05	0.063	1	2
Usp1	0.246433	-0.347219	0.13	0.148	1	2
D5Ertd579e	0.103243	-0.347135	0.135	0.164	1	2
Ints15	0.122031	-0.347109	0.042	0.062	1	2
Arfgap3	0.524982	-0.347003	0.029	0.035	1	2
Btbd3	0.746226	-0.346898	0.011	0.013	1	2
Ptger2	0.528409	-0.34674	0.029	0.035	1	2
Snx10	0.40801	-0.346679	0.137	0.149	1	2
Bmpr2	0.267823	-0.346441	0.076	0.093	1	2
Stam2	0.186095	-0.346244	0.143	0.167	1	2
Tmem214	0.391469	-0.346033	0.046	0.056	1	2
Xlr4b	0.717303	-0.346032	0.09	0.094	1	2
Spred2	0.311614	-0.34603	0.181	0.199	1	2
Cd74	0.00185481	-0.346027	0.139	0.204	1	2
Prpf4	0.619228	-0.345933	0.112	0.119	1	2
Tbk1	0.0309654	-0.345921	0.181	0.23	1	2
Bcl2l11	0.297866	-0.345902	0.501	0.489	1	2
Xpo1	0.117657	-0.345899	0.192	0.224	1	2
Pnpla3	0.513055	-0.345823	0.008	0.011	1	2
Larp1	0.00156844	-0.345648	0.356	0.428	1	2
Ttll11	0.337106	-0.345592	0.034	0.045	1	2
Nlk	0.0155136	-0.34538	0.28	0.332	1	2
H4c4	0.0200025	-0.345141	0.21	0.266	1	2
[truncated: 5,545 more rows]

## Sheet: WT ECTV vs Ifnar1 ECTV clu4-mDC
	p_val	avg_log2FC	pct.1	pct.2	p_val_adj	cluster		high in WT ECTV 1 dpi (-)	high in Ifnar1 ko ECTV 1 dpi (+)
Ifi27l2a	7.12631e-11	-6.66815	0.004	0.15	1.1794e-06	4
Acad12	0.0185944	-5.56128	0.004	0.028	1	4
Clec4e	0.076431	-5.32181	0	0.011	1	4
Dsg1a	0.0296988	-5.16277	0	0.017	1	4
Adamtsl1	0.0187558	-5.09108	0	0.02	1	4
Cfap47	0.0187558	-4.94397	0	0.02	1	4
Krt80	0.076431	-4.89923	0	0.011	1	4
D17H6S53E	0.0712212	-4.80436	0.004	0.02	1	4
Cdhr3	0.00759425	-4.6482	0	0.025	1	4
Kifc5b	0.00759425	-4.5808	0	0.025	1	4
Hpcal4	0.076431	-4.56875	0	0.011	1	4
Meak7	0.047385	-4.54401	0	0.014	1	4
Car9	0.0187558	-4.47924	0	0.02	1	4
Rab40b	0.0187558	-4.47677	0	0.02	1	4
Ccdc106	0.047385	-4.46924	0	0.014	1	4
Bank1	0.00759425	-4.44678	0	0.025	1	4
Iqck	0.12137	-4.39713	0.007	0.023	1	4
Ptprm	0.047385	-4.38617	0	0.014	1	4
Slc6a3	0.047385	-4.38273	0	0.014	1	4
Frmpd4	0.184056	-4.34168	0.007	0.02	1	4
P2ry6	0.076431	-4.29204	0	0.011	1	4
Kcnk3	0.076431	-4.25334	0	0.011	1	4
Tnfaip8l3	0.00485717	-4.21411	0	0.028	1	4
Arhgap33	0.076431	-4.21072	0	0.011	1	4
Ceacam15	0.076431	-4.19206	0	0.011	1	4
Csmd3	0.047385	-4.17463	0	0.014	1	4
Tbx15	0.0296988	-4.1737	0	0.017	1	4
Pik3r3	0.00513659	-4.15039	0.004	0.037	1	4
Erc2	0.047385	-4.14226	0	0.014	1	4
Gpr149	0.076431	-4.13303	0	0.011	1	4
Sgo1	0.076431	-4.11589	0	0.011	1	4
Oasl1	0.000886671	-4.1134	0.004	0.048	1	4
D130043K22Rik	0.076431	-4.09312	0	0.011	1	4
Rabl2	0.0187558	-4.09205	0	0.02	1	4
Fras1	0.0189863	-4.08795	0.004	0.028	1	4
Scel	0.278123	-4.08295	0.004	0.011	1	4
Zfp872	0.0296988	-4.02415	0	0.017	1	4
Ncam2	0.111302	-3.9851	0.004	0.017	1	4
Mc1r	0.047385	-3.96623	0	0.014	1	4
Pax5	0.047385	-3.95916	0	0.014	1	4
Rgs9bp	0.0292834	-3.95041	0.004	0.025	1	4
Gm21188	0.00124059	-3.94186	0.022	0.079	1	4
Ppp1r3b	0.047385	-3.93384	0	0.014	1	4
Rnft2	0.047385	-3.91857	0	0.014	1	4
Cmtm4	0.0534168	-3.91193	0.007	0.028	1	4
Gm3336	0.175509	-3.90788	0.004	0.014	1	4
Gsc	0.047385	-3.90223	0	0.014	1	4
Tbc1d24	0.0187558	-3.88737	0	0.02	1	4
Dennd2c	0.176345	-3.8841	0.004	0.014	1	4
Grin3a	0.076431	-3.86073	0	0.011	1	4
Prr11	0.184056	-3.81031	0.007	0.02	1	4
Col9a3	0.0457262	-3.80186	0.004	0.023	1	4
Nppc	0.076431	-3.80015	0	0.011	1	4
Gzmb	0.684112	-3.79956	0.018	0.023	1	4
Peg10	0.076431	-3.74676	0	0.011	1	4
Fam229b	0.00759425	-3.73128	0	0.025	1	4
Ifi44	0.0296988	-3.69809	0	0.017	1	4
Zfp324	0.047385	-3.69552	0	0.014	1	4
Pycrl	0.00510415	-3.69287	0.011	0.051	1	4
Clec9a	0.111848	-3.68682	0.004	0.017	1	4
Trim6	0.112396	-3.65656	0.004	0.017	1	4
Serpina11	0.076431	-3.65236	0	0.011	1	4
Ptk7	0.047385	-3.64947	0	0.014	1	4
Ttc21a	0.047385	-3.64853	0	0.014	1	4
Nell1	0.076431	-3.64064	0	0.011	1	4
Cryz	0.278123	-3.63484	0.004	0.011	1	4
H3c10	0.278123	-3.6246	0.004	0.011	1	4
Oasl2	0.00759425	-3.61715	0	0.025	1	4
Scube3	0.0799637	-3.59911	0.014	0.037	1	4
9130019O22Rik	0.111302	-3.59463	0.004	0.017	1	4
Ifi211	0.0383801	-3.59129	0.011	0.037	1	4
Cux2	0.076431	-3.59035	0	0.011	1	4
Spata32	0.047385	-3.58261	0	0.014	1	4
Klhdc9	0.047385	-3.55962	0	0.014	1	4
Pappa	0.047385	-3.54514	0	0.014	1	4
Sec14l2	0.076431	-3.54314	0	0.011	1	4
B3galnt1	0.076431	-3.52023	0	0.011	1	4
Hspa1l	0.0105042	-3.52005	0.007	0.04	1	4
Fam114a1	0.154317	-3.49104	0.018	0.037	1	4
Fam89a	0.000795445	-3.4818	0.007	0.056	1	4
Pcdhgb4	0.176345	-3.48027	0.004	0.014	1	4
Poc1a	0.111302	-3.46781	0.004	0.017	1	4
4933424G06Rik	0.047385	-3.46365	0	0.014	1	4
Lmo7	0.047385	-3.45657	0	0.014	1	4
Ldlrad1	0.076431	-3.44517	0	0.011	1	4
Hey2	0.112396	-3.44123	0.004	0.017	1	4
Smug1	0.0579659	-3.42967	0.014	0.04	1	4
Nek10	0.076431	-3.42268	0	0.011	1	4
Pole2	0.12209	-3.42148	0.011	0.028	1	4
Ttll11	0.178413	-3.40996	0.011	0.025	1	4
Garnl3	0.0187558	-3.40908	0	0.02	1	4
Foxred2	0.0253208	-3.40715	0.011	0.04	1	4
Tmem240	0.176345	-3.4069	0.004	0.014	1	4
Bckdk	0.00915046	-3.39879	0.022	0.065	1	4
Spef1l	0.405431	-3.38595	0.007	0.014	1	4
Nipa1	0.408175	-3.37444	0.007	0.014	1	4
Mterf1b	0.0187558	-3.36959	0	0.02	1	4
Spag1	0.047385	-3.36293	0	0.014	1	4
Sapcd1	0.076431	-3.36186	0	0.011	1	4
Zfp189	0.279394	-3.3577	0.004	0.011	1	4
Pdk2	0.235045	-3.35528	0.014	0.028	1	4
Cenph	0.0119103	-3.34569	0	0.023	1	4
Zfp605	0.0155364	-3.34085	0.007	0.037	1	4
Oas1a	0.0119103	-3.33888	0	0.023	1	4
Enthd1	0.0296988	-3.33427	0	0.017	1	4
Steap3	0.0715779	-3.31779	0.004	0.02	1	4
Gspt2	0.405431	-3.30664	0.007	0.014	1	4
Treml4	0.0296988	-3.29945	0	0.017	1	4
Arhgef4	0.986325	-3.28881	0.014	0.014	1	4
Hyal1	0.274245	-3.28545	0.007	0.017	1	4
Cd99l2	0.0715779	-3.28385	0.004	0.02	1	4
Lrfn4	0.279394	-3.28341	0.004	0.011	1	4
Kctd19	0.178026	-3.28185	0.004	0.014	1	4
Zfp316	0.0844245	-3.27562	0.011	0.031	1	4
Cdh26	0.0296988	-3.27405	0	0.017	1	4
Or2m12	0.047385	-3.26654	0	0.014	1	4
F9	0.279394	-3.25323	0.004	0.011	1	4
Zdhhc7	0.0130634	-3.25282	0.022	0.062	1	4
Dnah1	0.076431	-3.25103	0	0.011	1	4
Esr2	0.405431	-3.23143	0.007	0.014	1	4
Cenpk	0.124703	-3.23089	0.011	0.028	1	4
G0s2	0.175509	-3.2281	0.004	0.014	1	4
Tssk3	0.047385	-3.22656	0	0.014	1	4
Lrp2bp	0.047385	-3.22277	0	0.014	1	4
Emp2	0.0187558	-3.21035	0	0.02	1	4
Slc1a4	0.12137	-3.19573	0.007	0.023	1	4
Mmp14	0.0035836	-3.17809	0.011	0.054	1	4
Lmntd2	0.278123	-3.1726	0.004	0.011	1	4
Mtcp1	0.254125	-3.17138	0.011	0.023	1	4
Zfp455	0.185475	-3.15882	0.007	0.02	1	4
Grtp1	0.076431	-3.14905	0	0.011	1	4
Lbhd1	0.076431	-3.12866	0	0.011	1	4
Il11ra1	0.00299392	-3.11233	0.007	0.048	1	4
Cep41	0.00293651	-3.10819	0.007	0.048	1	4
Dgkq	0.00533258	-3.10274	0.011	0.051	1	4
Amacr	0.0826825	-3.09988	0.007	0.025	1	4
Sirpb1b	0.176345	-3.09081	0.004	0.014	1	4
Nanos1	0.183349	-3.09053	0.007	0.02	1	4
Abca13	0.076431	-3.08843	0	0.011	1	4
Nek4	0.0552816	-3.08838	0.007	0.028	1	4
Apbb1	0.047385	-3.08235	0	0.014	1	4
Tmem150a	0.594226	-3.08227	0.007	0.011	1	4
Cped1	0.076431	-3.07604	0	0.011	1	4
Prss2	0.790652	-3.06497	0.014	0.017	1	4
Ifi204	0.0187558	-3.0585	0	0.02	1	4
Zfp87	0.0132422	-3.05694	0.018	0.056	1	4
Zfp526	0.594226	-3.04373	0.007	0.011	1	4
Zcchc24	0.514142	-3.03958	0.011	0.017	1	4
Rad54l	0.0826825	-3.03359	0.007	0.025	1	4
Rab13	0.0715779	-3.01836	0.004	0.02	1	4
Gabbr2	0.707066	-3.00748	0.011	0.014	1	4
Eif5a2	0.185475	-3.00495	0.007	0.02	1	4
Yjefn3	0.278123	-3.00451	0.004	0.011	1	4
Pnp2	0.175509	-2.99715	0.004	0.014	1	4
Stx2	0.00156537	-2.99485	0.011	0.059	1	4
Pate2	0.175509	-2.99404	0.004	0.014	1	4
Col9a2	0.076431	-2.99055	0	0.011	1	4
AI429214	0.111848	-2.98751	0.004	0.017	1	4
Rasl10a	0.176345	-2.9812	0.004	0.014	1	4
Zfp873	0.110233	-2.97507	0.018	0.04	1	4
Rab39	0.185475	-2.9717	0.007	0.02	1	4
Ndufaf5	0.00131655	-2.96467	0.025	0.085	1	4
Krt7	0.111848	-2.95872	0.004	0.017	1	4
Tmem38a	0.256558	-2.95863	0.011	0.023	1	4
Smad6	0.278123	-2.95662	0.004	0.011	1	4
Serpine1	0.405431	-2.956	0.007	0.014	1	4
Npy1r	0.27325	-2.95268	0.007	0.017	1	4
Abcc3	0.596039	-2.9465	0.007	0.011	1	4
Zfp128	0.27325	-2.94402	0.007	0.017	1	4
Trpc1	0.0240217	-2.94252	0.007	0.034	1	4
Zfp971	0.0271151	-2.92561	0.018	0.051	1	4
Rmdn2	0.0352972	-2.92277	0.007	0.031	1	4
Klhl26	0.110564	-2.92151	0.018	0.04	1	4
Repin1	0.176345	-2.91598	0.004	0.014	1	4
Dclk2	0.258189	-2.91581	0.011	0.023	1	4
Mcm8	0.275243	-2.91181	0.007	0.017	1	4
B3galt6	0.179616	-2.90953	0.011	0.025	1	4
9530077C05Rik	0.070866	-2.90769	0.004	0.02	1	4
Scarf1	0.111848	-2.90073	0.004	0.017	1	4
Smyd1	0.0576282	-2.88494	0.011	0.034	1	4
Sh3yl1	0.076431	-2.88359	0	0.011	1	4
Bcas1	0.27325	-2.8804	0.007	0.017	1	4
Ficd	0.076431	-2.87757	0	0.011	1	4
Zfp273	0.076431	-2.87416	0	0.011	1	4
B630019K06Rik	0.076431	-2.87373	0	0.011	1	4
Nrtn	0.36481	-2.86936	0.011	0.02	1	4
Tcaf1	0.27325	-2.85819	0.007	0.017	1	4
Cd300c2	0.255745	-2.85699	0.011	0.023	1	4
Hecw1	0.28067	-2.84944	0.004	0.011	1	4
Gm2237	0.0722956	-2.8468	0.004	0.02	1	4
Fam174c	0.00282839	-2.84585	0.025	0.079	1	4
6720489N17Rik	0.047385	-2.84433	0	0.014	1	4
Smim40	0.111848	-2.8414	0.004	0.017	1	4
Cenpw	0.291712	-2.81735	0.018	0.031	1	4
Adtrp	0.0237001	-2.8121	0.007	0.034	1	4
Hdac11	0.175509	-2.8073	0.004	0.014	1	4
Lrp1b	0.00130625	-2.80596	0.007	0.054	1	4
Rnf217	0.00652077	-2.80362	0.022	0.068	1	4
Penk	0.278123	-2.80107	0.004	0.011	1	4
Sgsm2	0.0391627	-2.79768	0.018	0.048	1	4
Zfp229	0.186902	-2.79698	0.007	0.02	1	4
Nat8f1	0.0543425	-2.79584	0.007	0.028	1	4
Cep89	0.0364015	-2.79509	0.007	0.031	1	4
Pcdhgb6	0.279394	-2.79202	0.004	0.011	1	4
H2ac22	0.0464276	-2.79197	0.004	0.023	1	4
Tigit	0.0187558	-2.78802	0	0.02	1	4
H2-Q10	0.326186	-2.77821	0.014	0.025	1	4
Ndufaf1	0.343724	-2.7772	0.022	0.034	1	4
Pigz	0.0715779	-2.76768	0.004	0.02	1	4
L3mbtl1	0.28067	-2.75337	0.004	0.011	1	4
Itga9	0.278123	-2.74774	0.004	0.011	1	4
Ccne2	0.186187	-2.74743	0.007	0.02	1	4
Actr3b	0.187618	-2.74608	0.007	0.02	1	4
Tmem177	0.594226	-2.7403	0.007	0.011	1	4
Letm2	0.00750282	-2.7399	0.051	0.107	1	4
Zbtb39	0.039605	-2.7371	0.011	0.037	1	4
Shpk	0.0295865	-2.73022	0.004	0.025	1	4
Mpdz	0.076431	-2.71865	0	0.011	1	4
Prox2	0.071936	-2.71807	0.004	0.02	1	4
Gstz1	0.0399164	-2.7095	0.011	0.037	1	4
Epb41l5	0.389995	-2.70298	0.018	0.028	1	4
Zbtb3	0.076431	-2.70099	0	0.011	1	4
Gm10033	0.0421452	-2.68052	0.043	0.082	1	4
Sh3bp5l	0.177813	-2.6774	0.011	0.025	1	4
Zfp768	0.275243	-2.6749	0.007	0.017	1	4
Sh2d5	0.597855	-2.67218	0.007	0.011	1	4
Fktn	0.0128781	-2.67002	0.029	0.073	1	4
Sit1	0.0712212	-2.66986	0.004	0.02	1	4
Wdr27	0.27325	-2.66856	0.007	0.017	1	4
Ccr10	0.112946	-2.66562	0.004	0.017	1	4
Gapdhs	0.27325	-2.66321	0.007	0.017	1	4
Farp2	0.0169022	-2.66024	0.011	0.042	1	4
Gatm	0.0454944	-2.65731	0.004	0.023	1	4
Pfkm	0.111302	-2.6545	0.004	0.017	1	4
Hddc3	0.112396	-2.65079	0.004	0.017	1	4
Nbl1	0.076431	-2.64923	0	0.011	1	4
Tor3a	0.0160464	-2.64778	0.029	0.071	1	4
Ncaph	0.076431	-2.64663	0	0.011	1	4
Slc7a8	0.184764	-2.64463	0.007	0.02	1	4
Dhdh	0.0531108	-2.64208	0.022	0.051	1	4
Msl3l2	0.00580468	-2.63852	0.014	0.056	1	4
Glis1	0.047385	-2.6363	0	0.014	1	4
Tnfrsf8	0.076431	-2.63624	0	0.011	1	4
Ptprv	0.112946	-2.6291	0.004	0.017	1	4
Gal3st2b	0.0847355	-2.62837	0.011	0.031	1	4
Foxq1	0.178026	-2.628	0.004	0.014	1	4
Zfp870	0.0722956	-2.62454	0.004	0.02	1	4
Ptger2	0.0294346	-2.62229	0.004	0.025	1	4
Enox1	0.185475	-2.62207	0.007	0.02	1	4
B3gat2	0.278123	-2.62144	0.004	0.011	1	4
Smim35	0.597855	-2.62044	0.007	0.011	1	4
Il2	0.279394	-2.61666	0.004	0.011	1	4
Tmsb15b1	0.123827	-2.61285	0.011	0.028	1	4
Sag	0.601565	-2.61084	0.014	0.02	1	4
Aldh1b1	0.0295865	-2.60717	0.004	0.025	1	4
Cdiptos	0.991453	-2.59791	0.014	0.014	1	4
B3galt4	0.361589	-2.59233	0.011	0.02	1	4
Cyb5d2	0.110897	-2.58969	0.018	0.04	1	4
Dtx4	0.175509	-2.58047	0.004	0.014	1	4
Afap1	0.058168	-2.57232	0.014	0.04	1	4
Gm3667	0.368048	-2.56943	0.011	0.02	1	4
Gpsm2	0.177184	-2.56702	0.004	0.014	1	4
Clip4	0.175509	-2.5635	0.004	0.014	1	4
Map1a	0.076431	-2.55938	0	0.011	1	4
Il17re	0.0715779	-2.55823	0.004	0.02	1	4
Piga	0.172099	-2.55114	0.025	0.045	1	4
Notch4	0.278123	-2.54506	0.004	0.011	1	4
Sdr42e1	0.0722956	-2.54434	0.004	0.02	1	4
Ephx1	0.0298924	-2.54256	0.004	0.025	1	4
Kcnip4	0.178026	-2.5404	0.004	0.014	1	4
Nol4	0.076431	-2.53372	0	0.011	1	4
Sgsh	0.0859887	-2.52819	0.011	0.031	1	4
Or2w1b	0.279394	-2.52574	0.004	0.011	1	4
Slc25a47	0.0853602	-2.52035	0.011	0.031	1	4
Cdnf	0.0300463	-2.5052	0.004	0.025	1	4
St6galnac6	0.158558	-2.50215	0.036	0.059	1	4
Creb3l1	0.277246	-2.49518	0.007	0.017	1	4
Gm11639	0.510006	-2.49474	0.011	0.017	1	4
Slfn3	0.41093	-2.48901	0.007	0.014	1	4
Yod1	0.325306	-2.48711	0.014	0.025	1	4
Galns	0.195643	-2.48582	0.022	0.04	1	4
Shank2	0.076431	-2.48466	0	0.011	1	4
Hykk	0.279394	-2.47604	0.004	0.011	1	4
Garin4	0.0298924	-2.46812	0.004	0.025	1	4
1700113H08Rik	0.0461928	-2.46394	0.004	0.023	1	4
Gab1	0.0826825	-2.46184	0.007	0.025	1	4
Rec8	0.279394	-2.4597	0.004	0.011	1	4
Wdr45	0.551049	-2.45708	0.029	0.037	1	4
Zcchc3	0.274245	-2.44992	0.007	0.017	1	4
Mettl21a	0.071936	-2.44781	0.004	0.02	1	4
Carf	0.00180228	-2.44774	0.014	0.065	1	4
Klhl14	0.278123	-2.44723	0.004	0.011	1	4
Zfp184	0.257373	-2.44383	0.011	0.023	1	4
Actn2	0.056756	-2.4403	0.011	0.034	1	4
Mtmr7	0.276244	-2.43988	0.007	0.017	1	4
Lrrc14	0.0180427	-2.43363	0.025	0.065	1	4
Srd5a1	0.111302	-2.43001	0.004	0.017	1	4
Castor1	0.0378199	-2.42926	0.022	0.054	1	4
Abhd8	0.00436016	-2.4238	0.029	0.082	1	4
Nudt6	0.201486	-2.42056	0.029	0.048	1	4
Alg10b	0.0451626	-2.41649	0.029	0.062	1	4
Zfp456	0.183349	-2.41543	0.007	0.02	1	4
Birc5	0.707066	-2.41272	0.011	0.014	1	4
Csgalnact1	0.112946	-2.4102	0.004	0.017	1	4
Tchh	0.293194	-2.4089	0.018	0.031	1	4
Pira12	0.036242	-2.40678	0.007	0.031	1	4
Mterf4	0.0847355	-2.40348	0.011	0.031	1	4
Zwilch	0.125142	-2.40079	0.011	0.028	1	4
Arrb1	0.00141912	-2.4006	0.025	0.085	1	4
Entrep1	0.179014	-2.39804	0.011	0.025	1	4
Spag6	0.076431	-2.39706	0	0.011	1	4
Cmtr2	0.36481	-2.39119	0.011	0.02	1	4
Tbc1d25	0.521075	-2.38367	0.011	0.017	1	4
Il17c	0.279394	-2.38337	0.004	0.011	1	4
Crppa	0.351097	-2.37562	0.029	0.042	1	4
Itgb5	0.0243471	-2.37382	0.007	0.034	1	4
Slfn8	0.00161652	-2.3569	0.025	0.085	1	4
Ly6c1	0.278123	-2.35461	0.004	0.011	1	4
Bdh1	0.18022	-2.35197	0.011	0.025	1	4
Atp8b1	0.362661	-2.34717	0.011	0.02	1	4
Zfp763	0.18022	-2.34561	0.011	0.025	1	4
4930563E22Rik	0.275243	-2.34403	0.007	0.017	1	4
Gm27021	0.278123	-2.34273	0.004	0.011	1	4
Zfp275	0.00286586	-2.34155	0.014	0.062	1	4
Miga2	0.18022	-2.33816	0.011	0.025	1	4
Lipo3	0.114047	-2.33449	0.04	0.068	1	4
Ncdn	0.0805098	-2.33117	0.032	0.062	1	4
Rrn3	0.0111812	-2.33111	0.04	0.09	1	4
Lilra6	0.369131	-2.32567	0.011	0.02	1	4
Mrps2	0.0866208	-2.32413	0.011	0.031	1	4
Kctd16	0.258189	-2.31533	0.011	0.023	1	4
Srr	0.119085	-2.31398	0.029	0.054	1	4
Fbxl9	0.668419	-2.31303	0.018	0.023	1	4
A3galt2	0.596039	-2.30603	0.007	0.011	1	4
Myh7	0.076431	-2.30592	0	0.011	1	4
Tcp11	0.0302009	-2.30516	0.004	0.025	1	4
Rapsn	0.27325	-2.30281	0.007	0.017	1	4
Agbl5	0.259827	-2.30031	0.011	0.023	1	4
Btbd19	0.597855	-2.29697	0.007	0.011	1	4
Trim47	0.275243	-2.29487	0.007	0.017	1	4
Dnm3	0.0193854	-2.29465	0.004	0.028	1	4
Id1	0.409551	-2.29285	0.007	0.014	1	4
Trim68	0.0241297	-2.28799	0.007	0.034	1	4
Adora2b	0.278123	-2.28286	0.004	0.011	1	4
Dnd1	0.596039	-2.27858	0.007	0.011	1	4
Leo1	0.033413	-2.27787	0.04	0.079	1	4
Mboat2	0.183349	-2.27135	0.007	0.02	1	4
Apol7e	0.0176398	-2.26902	0.025	0.065	1	4
Slfn1	0.112396	-2.26733	0.004	0.017	1	4
Mllt1	0.169592	-2.26573	0.036	0.059	1	4
Arsg	0.279394	-2.26166	0.004	0.011	1	4
Smyd5	0.199679	-2.25949	0.022	0.04	1	4
Mlkl	0.279394	-2.25651	0.004	0.011	1	4
Hoxb4	0.705378	-2.25631	0.011	0.014	1	4
Zc4h2	0.175509	-2.2503	0.004	0.014	1	4
Cit	0.261473	-2.24905	0.011	0.023	1	4
Pole3	0.00302957	-2.24863	0.025	0.079	1	4
Maged2	0.710445	-2.24801	0.011	0.014	1	4
Rad1	0.010407	-2.24795	0.007	0.04	1	4
Rasgef1a	0.598865	-2.23593	0.014	0.02	1	4
Sirpb1a	0.178026	-2.23436	0.004	0.014	1	4
Plpp1	0.214895	-2.23313	0.018	0.034	1	4
Anxa9	0.408175	-2.22671	0.007	0.014	1	4
Dnai2	0.076431	-2.22599	0	0.011	1	4
Ankrd13d	0.523942	-2.22588	0.018	0.025	1	4
Dram1	0.08552	-2.22226	0.014	0.037	1	4
Tfb2m	0.170454	-2.22092	0.069	0.096	1	4
Mesd	0.0129664	-2.22076	0.047	0.099	1	4
Bhlhb9	0.0156707	-2.21628	0.036	0.082	1	4
Elfn1	0.124264	-2.20954	0.011	0.028	1	4
Tfpi	0.111848	-2.2071	0.004	0.017	1	4
Stard8	0.112946	-2.20492	0.004	0.017	1	4
Bmpr1a	0.184699	-2.20163	0.032	0.054	1	4
Baiap2l1	0.306237	-2.19994	0.025	0.04	1	4
Slc26a9	0.28067	-2.19914	0.004	0.011	1	4
Tns2	0.0722956	-2.19676	0.004	0.02	1	4
Nnt.1	0.601565	-2.19657	0.014	0.02	1	4
Cacng8	0.000293115	-2.19487	0.047	0.13	1	4
Etfrf1	0.0764926	-2.19315	0.022	0.048	1	4
Zfp414	0.0745694	-2.19132	0.036	0.068	1	4
Pcgf2	0.047385	-2.19088	0	0.014	1	4
Iba57	0.514142	-2.17463	0.011	0.017	1	4
Rhobtb1	0.0193854	-2.16978	0.004	0.028	1	4
Gmppb	0.302238	-2.16967	0.025	0.04	1	4
Spc24	0.279394	-2.16655	0.004	0.011	1	4
Ifi207	0.00303764	-2.16525	0.007	0.048	1	4
Nipal1	0.15995	-2.15988	0.036	0.059	1	4
Ifitm3	0.156536	-2.15271	0.018	0.037	1	4
Rnasek	0.412311	-2.15226	0.007	0.014	1	4
Inca1	0.795357	-2.1382	0.014	0.017	1	4
Cybrd1	0.370217	-2.13801	0.011	0.02	1	4
Dpagt1	0.165317	-2.13683	0.014	0.031	1	4
Fam20a	0.416473	-2.13673	0.007	0.014	1	4
Slfn9	0.122844	-2.13664	0.007	0.023	1	4
Hmga2	0.277246	-2.13601	0.007	0.017	1	4
Atp9a	0.28067	-2.1326	0.004	0.011	1	4
Gm49355	0.28067	-2.12831	0.004	0.011	1	4
Il7	0.0324772	-2.1204	0.032	0.071	1	4
Cdh23	0.206119	-2.11908	0.029	0.048	1	4
Eda	0.0280979	-2.11839	0.022	0.056	1	4
P4ha2	0.076431	-2.11555	0	0.011	1	4
Phf21b	0.0158237	-2.11368	0.007	0.037	1	4
Fhod3	0.112946	-2.10939	0.004	0.017	1	4
Akt1s1	0.164897	-2.10643	0.036	0.059	1	4
Fabp4	0.59617	-2.09639	0.014	0.02	1	4
Ccdc40	0.259827	-2.09489	0.011	0.023	1	4
Akr1c12	0.047385	-2.09389	0	0.014	1	4
Gys1	0.172525	-2.0914	0.025	0.045	1	4
Rragd	0.121421	-2.08736	0.014	0.034	1	4
Cep104	0.128748	-2.0868	0.036	0.062	1	4
Fgf2	0.857558	-2.0853	0.018	0.02	1	4
Syce1l	0.409551	-2.07074	0.007	0.014	1	4
Ifi27	2.20113e-08	-2.07012	0.054	0.209	0.000364287	4
Fbxo46	0.395547	-2.06682	0.032	0.045	1	4
Nqo2	0.275243	-2.0643	0.007	0.017	1	4
Ifit1	0.254125	-2.06319	0.011	0.023	1	4
Nupr1l	0.104772	-2.06069	0.022	0.045	1	4
Spc25	0.599674	-2.05801	0.007	0.011	1	4
Rnf152	0.514142	-2.05397	0.011	0.017	1	4
Sgcb	0.0193854	-2.05286	0.004	0.028	1	4
Acsbg1	0.045959	-2.05176	0.004	0.023	1	4
Slc19a1	0.12186	-2.05107	0.007	0.023	1	4
Abhd4	0.0343378	-2.04948	0.029	0.065	1	4
Plscr4	0.952613	-2.04542	0.011	0.011	1	4
Slc19a2	0.370217	-2.04201	0.011	0.02	1	4
Isg15	0.055811	-2.0419	0.036	0.071	1	4
Gcdh	0.027734	-2.04189	0.022	0.056	1	4
Lrrcc1	0.00443817	-2.0415	0.061	0.127	1	4
Oas3	0.076431	-2.03908	0	0.011	1	4
Zfp985	0.047385	-2.03872	0	0.014	1	4
Zfp948	0.027119	-2.03853	0.011	0.04	1	4
Tlr4	0.278123	-2.03394	0.004	0.011	1	4
Tceanc	0.274245	-2.03224	0.007	0.017	1	4
Rcn1	0.107018	-2.02939	0.051	0.082	1	4
Inafm1	0.965882	-2.02899	0.032	0.031	1	4
Zfp518b	0.175509	-2.0235	0.004	0.014	1	4
Fpgt	0.0414146	-2.02225	0.014	0.042	1	4
Dclre1a	0.00158098	-2.01974	0.025	0.085	1	4
Tpbg	0.371304	-2.01078	0.011	0.02	1	4
Umad1	0.079503	-2.01018	0.051	0.085	1	4
Gstm1	0.0580285	-2.00724	0.018	0.045	1	4
Tmtc1	0.278123	-2.00496	0.004	0.011	1	4
Atg9b	0.076431	-2.00358	0	0.011	1	4
Zfp934	0.399963	-2.00068	0.025	0.037	1	4
Gm3435	0.111302	-2.00051	0.004	0.017	1	4
H2ac15	0.712137	-1.99773	0.011	0.014	1	4
AI661453	0.599674	-1.99175	0.007	0.011	1	4
Styxl1	0.279394	-1.98207	0.004	0.011	1	4
Fcgr3	0.601495	-1.97723	0.007	0.011	1	4
Nlrp10	0.274245	-1.97535	0.007	0.017	1	4
Cttnbp2	0.076431	-1.9744	0	0.011	1	4
Piwil4	0.124703	-1.97323	0.011	0.028	1	4
Ddx60	0.0028774	-1.96842	0.018	0.068	1	4
B3gnt2	0.00940491	-1.96767	0.029	0.076	1	4
Med22	0.00412995	-1.96559	0.018	0.065	1	4
Ints5	0.168388	-1.96421	0.014	0.031	1	4
Mcfd2	0.0914526	-1.96311	0.029	0.056	1	4
Dolpp1	0.702008	-1.96278	0.011	0.014	1	4
Cpa3	0.260649	-1.96212	0.011	0.023	1	4
Zfp568	0.037886	-1.96177	0.065	0.11	1	4
Kcnip1	0.0421526	-1.96165	0.018	0.048	1	4
Slc4a4	0.126913	-1.95906	0.011	0.028	1	4
Slx1b	0.0106023	-1.95631	0.007	0.04	1	4
Dab2ip	0.237091	-1.95112	0.014	0.028	1	4
Fermt2	0.00293489	-1.9461	0.018	0.068	1	4
Slc5a6	0.186902	-1.94434	0.007	0.02	1	4
Zc2hc1a	0.000697689	-1.94155	0.054	0.133	1	4
Trpm3	0.772377	-1.94088	0.011	0.008	1	4
Nhej1	0.13332	-1.94	0.025	0.048	1	4
Gm10643	0.076431	-1.93799	0	0.011	1	4
Prss12	0.276244	-1.93498	0.007	0.017	1	4
Insig2	0.000727962	-1.93352	0.022	0.085	1	4
Phf11a	0.0121819	-1.93174	0.011	0.045	1	4
Cdc42bpg	0.114606	-1.92753	0.018	0.04	1	4
Gm45902	0.29468	-1.92509	0.018	0.031	1	4
Slc35f2	0.277246	-1.92277	0.007	0.017	1	4
Slc25a35	0.12181	-1.92142	0.014	0.034	1	4
Shisa2	0.278252	-1.91883	0.007	0.017	1	4
Lgalsl	0.041712	-1.9188	0.014	0.042	1	4
Ado	0.144283	-1.91845	0.022	0.042	1	4
Cdca8	0.950681	-1.91778	0.011	0.011	1	4
Rab27b	0.175509	-1.91699	0.004	0.014	1	4
Gfra1	0.508631	-1.91626	0.011	0.017	1	4
B4galt7	0.194144	-1.91585	0.022	0.04	1	4
Nbea	1.28295e-07	-1.91476	0.065	0.218	0.00212328	4
Hsh2d	0.00827979	-1.91377	0.051	0.107	1	4
Ptges	0.076431	-1.91286	0	0.011	1	4
Tstd3	0.0866208	-1.9104	0.011	0.031	1	4
Melk	0.243305	-1.90962	0.014	0.028	1	4
Sox12	0.176345	-1.90553	0.004	0.014	1	4
S1pr2	0.447386	-1.9011	0.014	0.023	1	4
Slc24a3	0.00467969	-1.89757	0.007	0.045	1	4
Tamm41	0.295426	-1.89637	0.018	0.031	1	4
Trpm2	0.597855	-1.89204	0.007	0.011	1	4
Zfp212	0.263309	-1.89042	0.04	0.059	1	4
Coq6	0.0569782	-1.88699	0.022	0.051	1	4
Rhod	0.111848	-1.88532	0.004	0.017	1	4
Ccdc189	0.880587	-1.88021	0.022	0.02	1	4
Gm20695	0.076431	-1.87326	0	0.011	1	4
Zfp287	0.214172	-1.86887	0.029	0.048	1	4
Lgals4	0.0830267	-1.86462	0.007	0.025	1	4
Gopc	0.0814273	-1.86222	0.079	0.119	1	4
Zfp341	0.0846672	-1.86158	0.014	0.037	1	4
Naa60	0.308379	-1.86038	0.047	0.065	1	4
Lsr	0.267248	-1.85847	0.029	0.045	1	4
Tdp1	0.390498	-1.85411	0.032	0.045	1	4
Nhsl2	0.0192397	-1.85037	0.014	0.048	1	4
Grid1	0.000541574	-1.84737	0.058	0.141	1	4
Tmem185a	0.457457	-1.84582	0.014	0.023	1	4
Phf11b	0.00548168	-1.84347	0.065	0.13	1	4
Ccl6	0.125834	-1.84277	0.007	0.023	1	4
Pnck	0.175509	-1.84088	0.004	0.014	1	4
Ptgfrn	0.597855	-1.83927	0.007	0.011	1	4
Upb1	0.112571	-1.83596	0.018	0.04	1	4
Tpx2	0.186902	-1.83572	0.007	0.02	1	4
Bag2	0.16242	-1.83492	0.018	0.037	1	4
Epb41l1	0.601565	-1.83162	0.014	0.02	1	4
Tlr1	0.0261665	-1.83021	0.025	0.062	1	4
Tmem220	0.28067	-1.82957	0.004	0.011	1	4
Phospho2	0.0799079	-1.82517	0.043	0.076	1	4
Zfp940	0.408175	-1.82432	0.007	0.014	1	4
Svip	0.366967	-1.82297	0.011	0.02	1	4
Tm7sf2	0.597855	-1.82133	0.007	0.011	1	4
Map7d3	0.597855	-1.82002	0.007	0.011	1	4
Cyp4v3	0.13574	-1.81999	0.025	0.048	1	4
Nudt16	0.0740477	-1.81957	0.022	0.048	1	4
Mocs3	0.600214	-1.81762	0.014	0.02	1	4
Kcna3	0.408175	-1.81444	0.007	0.014	1	4
Zswim1	0.816384	-1.81205	0.029	0.025	1	4
Gm3752	0.076431	-1.8044	0	0.011	1	4
Cyb5r1	0.0284102	-1.80334	0.014	0.045	1	4
Acot6	0.047385	-1.80238	0	0.014	1	4
Sema3d	0.0589822	-1.80132	0.014	0.04	1	4
Cpt2	0.927852	-1.79949	0.022	0.023	1	4
Dach2	0.452965	-1.79914	0.014	0.023	1	4
Bbs10	0.41093	-1.79831	0.007	0.014	1	4
Kctd12b	0.124264	-1.79815	0.011	0.028	1	4
Wdhd1	0.0530544	-1.79418	0.025	0.056	1	4
Adam15	0.122956	-1.794	0.011	0.028	1	4
Zfp982	0.0386389	-1.7933	0.018	0.048	1	4
Bpgm	0.726867	-1.793	0.043	0.048	1	4
AA467197	0.335973	-1.79271	0.014	0.025	1	4
Dis3	0.115323	-1.79119	0.04	0.068	1	4
Haspin	0.594226	-1.7895	0.007	0.011	1	4
Emc1	0.0648061	-1.7889	0.032	0.065	1	4
Gm5127	0.405431	-1.78799	0.007	0.014	1	4
Tektip1	0.278252	-1.7871	0.007	0.017	1	4
Gm7694	0.446274	-1.7869	0.014	0.023	1	4
Arv1	0.178139	-1.78121	0.04	0.062	1	4
Uhrf1bp1	0.708755	-1.78113	0.011	0.014	1	4
Zfp61	0.472897	-1.78099	0.032	0.023	1	4
Def8	0.0863043	-1.7801	0.011	0.031	1	4
Nr6a1	0.0215767	-1.77786	0.043	0.09	1	4
Gpr34	0.863403	-1.77397	0.018	0.02	1	4
Gab3	0.0619819	-1.77153	0.087	0.13	1	4
Sucnr1	0.0193854	-1.76922	0.004	0.028	1	4
Scoc	0.139066	-1.7669	0.051	0.079	1	4
Stac3	0.279394	-1.76651	0.004	0.011	1	4
Usp54	0.0287261	-1.76398	0.014	0.045	1	4
Edaradd	0.599674	-1.76322	0.007	0.011	1	4
Pip4p2	0.168167	-1.76021	0.029	0.051	1	4
Cr2	0.186902	-1.75883	0.007	0.02	1	4
Ulk4	0.54515	-1.75849	0.036	0.045	1	4
Trim34a	0.00773158	-1.75558	0.061	0.121	1	4
Kif11	0.408175	-1.7553	0.007	0.014	1	4
Tmem109	0.079296	-1.75288	0.032	0.062	1	4
Ccdc43	0.898863	-1.75053	0.047	0.048	1	4
Tecpr2	0.0688731	-1.74911	0.029	0.059	1	4
Dclre1b	0.596039	-1.74871	0.007	0.011	1	4
Ccdc71	0.78495	-1.74615	0.036	0.04	1	4
Armc3	0.362661	-1.74567	0.011	0.02	1	4
Dhcr24	0.559595	-1.74464	0.029	0.037	1	4
Igf2bp3	0.329723	-1.7437	0.014	0.025	1	4
Dcstamp	0.772377	-1.74326	0.011	0.008	1	4
Klhl8	0.00629603	-1.74316	0.036	0.09	1	4
Tmem35b	0.198158	-1.74294	0.022	0.04	1	4
Lgals3bp	0.00422973	-1.74047	0.025	0.076	1	4
Zfp367	0.10216	-1.73971	0.043	0.073	1	4
Aph1b	0.0372083	-1.73875	0.007	0.031	1	4
Adssl1	0.00665182	-1.73871	0.018	0.062	1	4
P3h2	0.0397855	-1.73185	0.022	0.054	1	4
Egfr	0.0272281	-1.73049	0.011	0.04	1	4
Apol7b	0.335076	-1.72827	0.014	0.025	1	4
Gmpr	0.459935	-1.72469	0.022	0.031	1	4
Klra7	0.602917	-1.72338	0.014	0.02	1	4
Haus2	0.389062	-1.72015	0.032	0.045	1	4
Abhd1	0.982906	-1.72007	0.014	0.014	1	4
Ocln	0.057848	-1.7197	0.011	0.034	1	4
Gprasp2	0.396724	-1.71776	0.025	0.037	1	4
Psen2	0.0138856	-1.71453	0.054	0.107	1	4
9930104L06Rik	0.387102	-1.71444	0.025	0.037	1	4
Thumpd3	0.0678756	-1.7099	0.065	0.105	1	4
Rsl1	0.040448	-1.70829	0.025	0.059	1	4
Gm28053	0.0244564	-1.70779	0.007	0.034	1	4
Emp1	0.0267543	-1.70708	0.022	0.056	1	4
Zfp428	0.597855	-1.70543	0.007	0.011	1	4
Car13	0.0830267	-1.7042	0.007	0.025	1	4
Ago4	0.0369656	-1.70363	0.025	0.059	1	4
Cap2	0.0726566	-1.70292	0.004	0.02	1	4
Kifc2	0.41093	-1.70265	0.007	0.014	1	4
Foxd1	0.472894	-1.70087	0.011	0.006	1	4
Zfp617	0.138803	-1.70069	0.032	0.056	1	4
Slc17a5	0.0691488	-1.69882	0.058	0.096	1	4
Cnrip1	0.243305	-1.69812	0.014	0.028	1	4
Gcat	0.178026	-1.69625	0.004	0.014	1	4
Trim56	0.121861	-1.69387	0.054	0.085	1	4
Pla2g15	0.0555184	-1.69206	0.007	0.028	1	4
Cdt1	0.617203	-1.69182	0.054	0.062	1	4
Usp20	0.124984	-1.68966	0.054	0.085	1	4
Phf11d	0.258189	-1.68864	0.011	0.023	1	4
Trappc2	0.184699	-1.68839	0.032	0.054	1	4
Cisd1	0.00634234	-1.6855	0.083	0.15	1	4
Gm10130	0.0277581	-1.68544	0.025	0.062	1	4
Ampd3	0.813948	-1.68429	0.029	0.025	1	4
Ppp1r3e	0.734976	-1.68238	0.022	0.025	1	4
Casp2	0.110477	-1.68209	0.043	0.073	1	4
Zfp953	0.179014	-1.67884	0.011	0.025	1	4
Il1rn	0.282298	-1.67837	0.007	0.017	1	4
Asb8	0.0758009	-1.67567	0.072	0.11	1	4
Tm2d3	0.182202	-1.67426	0.061	0.088	1	4
Zfp146	0.320467	-1.67407	0.032	0.048	1	4
Hus1	0.0843845	-1.67309	0.014	0.037	1	4
Cdc45	0.599674	-1.67258	0.007	0.011	1	4
Zfp667	0.258189	-1.6722	0.011	0.023	1	4
Nanp	0.398324	-1.67103	0.018	0.028	1	4
Crtam	0.123835	-1.67068	0.007	0.023	1	4
Raver2	0.076431	-1.66732	0	0.011	1	4
Trp53i13	0.245059	-1.66716	0.025	0.042	1	4
Snx16	0.00202072	-1.6634	0.043	0.11	1	4
Rbm11	0.113498	-1.66087	0.004	0.017	1	4
Nsun5	0.0542639	-1.65827	0.022	0.051	1	4
Slc35b1	0.0516819	-1.65696	0.058	0.099	1	4
Gas2	0.126338	-1.65671	0.007	0.023	1	4
Selenbp1	0.184764	-1.65616	0.007	0.02	1	4
Ppm1j	0.185475	-1.65483	0.007	0.02	1	4
Rhno1	0.197653	-1.65468	0.022	0.04	1	4
Ammecr1	0.0486487	-1.65433	0.051	0.09	1	4
Zfp493	0.28067	-1.65271	0.004	0.011	1	4
Sppl2b	0.24641	-1.65209	0.04	0.059	1	4
Catsperd	0.772377	-1.65152	0.011	0.008	1	4
Plin2	0.279049	-1.64779	0.043	0.062	1	4
Shcbp1	0.189057	-1.64028	0.007	0.02	1	4
Tnfrsf25	0.0423122	-1.64008	0.014	0.042	1	4
Zfp524	0.135596	-1.63974	0.032	0.056	1	4
Slc38a3	0.183262	-1.63664	0.011	0.025	1	4
Pigo	0.17989	-1.63221	0.025	0.045	1	4
Igf2bp2	0.28195	-1.63144	0.004	0.011	1	4
4932438H23Rik	0.279259	-1.63104	0.007	0.017	1	4
Kifap3	0.0537289	-1.63099	0.058	0.099	1	4
Rpusd2	0.276244	-1.62901	0.007	0.017	1	4
C330018D20Rik	0.179012	-1.62896	0.025	0.045	1	4
Slc35d2	0.0587823	-1.62814	0.018	0.045	1	4
Stambp	0.0118224	-1.62595	0.051	0.105	1	4
Gm10053	0.176345	-1.62422	0.004	0.014	1	4
Cdadc1	0.00817954	-1.6231	0.04	0.093	1	4
Mrnip	0.140428	-1.62069	0.032	0.056	1	4
Ttc39c	0.0277874	-1.62026	0.014	0.045	1	4
Zfand4	0.126722	-1.62022	0.036	0.062	1	4
Treml2	0.0379825	-1.61854	0.025	0.059	1	4
Dnajc14	0.0889371	-1.61676	0.065	0.102	1	4
Chic1	0.200188	-1.61669	0.022	0.04	1	4
Dhx35	0.0145772	-1.61437	0.04	0.088	1	4
Cfap61	0.370217	-1.61353	0.011	0.02	1	4
Pgp	0.068556	-1.61165	0.065	0.105	1	4
5430403G16Rik	0.0578492	-1.60883	0.022	0.051	1	4
Pomt2	0.243305	-1.6085	0.014	0.028	1	4
Bnip3	0.160137	-1.60797	0.018	0.037	1	4
Cdh1	0.514142	-1.6071	0.011	0.017	1	4
Nxpe4	0.108377	-1.60595	0.022	0.045	1	4
Shmt1	0.00899981	-1.60571	0.032	0.082	1	4
Mrpl53	0.193409	-1.60214	0.083	0.11	1	4
Zfp976	0.408175	-1.60202	0.007	0.014	1	4
Gbp6	0.409551	-1.60054	0.007	0.014	1	4
Tprkb	0.362771	-1.59728	0.054	0.071	1	4
Gng7	0.264211	-1.5933	0.014	0.006	1	4
Pde8a	0.197629	-1.59086	0.04	0.062	1	4
Bcam	0.600214	-1.58868	0.014	0.02	1	4
Col17a1	0.526191	-1.58786	0.018	0.025	1	4
Mzt2	0.356726	-1.58776	0.029	0.042	1	4
Tenm2	0.12181	-1.58707	0.014	0.034	1	4
Gatd1	0.162288	-1.58699	0.065	0.093	1	4
Atp1a3	0.184764	-1.58641	0.007	0.02	1	4
Vcpkmt	0.987014	-1.58612	0.04	0.04	1	4
Inpp5f	0.0039073	-1.58478	0.043	0.105	1	4
Rftn2	0.41093	-1.58468	0.007	0.014	1	4
Myo6	0.311831	-1.5831	0.032	0.048	1	4
Mturn	0.0554379	-1.58264	0.022	0.051	1	4
Efna4	0.597855	-1.58161	0.007	0.011	1	4
D7Ertd443e	0.0405454	-1.5801	0.011	0.037	1	4
Pdp2	0.39582	-1.5795	0.04	0.054	1	4
Tnks1bp1	0.315514	-1.57946	0.032	0.048	1	4
Ascc1	0.00880711	-1.57201	0.076	0.138	1	4
Fubp3	0.00108956	-1.57177	0.036	0.105	1	4
Nphp3	0.937344	-1.56971	0.036	0.037	1	4
Slamf8	0.277246	-1.5674	0.007	0.017	1	4
Dnal4	0.319224	-1.56489	0.032	0.048	1	4
G6pc3	0.494493	-1.56379	0.032	0.042	1	4
Dbr1	0.0183355	-1.56301	0.025	0.065	1	4
Abi2	0.000770522	-1.56173	0.072	0.158	1	4
Cracd	0.408175	-1.56116	0.007	0.014	1	4
Gm49510	0.279394	-1.55544	0.004	0.011	1	4
Chmp6	0.987014	-1.55371	0.04	0.04	1	4
Cox6b2	0.976152	-1.55165	0.025	0.025	1	4
Mmgt1	0.399256	-1.55074	0.018	0.028	1	4
2010109A12Rik	0.277246	-1.54998	0.007	0.017	1	4
Ermard	0.0178121	-1.54945	0.032	0.076	1	4
Chdh	0.277246	-1.54914	0.007	0.017	1	4
Fam220a.1	0.0552816	-1.54859	0.007	0.028	1	4
Ms4a7	0.594226	-1.54772	0.007	0.011	1	4
Mras	0.705648	-1.54701	0.029	0.034	1	4
H2bc15	0.278252	-1.54547	0.007	0.017	1	4
Timm29	0.165422	-1.54537	0.029	0.051	1	4
Prelid3a	0.186902	-1.54512	0.007	0.02	1	4
Mss51	0.594226	-1.54091	0.007	0.011	1	4
H2-T24	0.278123	-1.54006	0.004	0.011	1	4
Actr8	0.0680398	-1.53897	0.04	0.073	1	4
C2cd2l	0.159231	-1.53516	0.018	0.037	1	4
Stkld1	0.41093	-1.53474	0.007	0.014	1	4
Fcrl5	0.279394	-1.53233	0.004	0.011	1	4
Tyw5	0.0210791	-1.53108	0.022	0.059	1	4
Ints12	0.300883	-1.53026	0.04	0.056	1	4
Ppic	0.508631	-1.52982	0.011	0.017	1	4
Il4	0.114052	-1.52809	0.004	0.017	1	4
Dcun1d3	0.835507	-1.52731	0.04	0.042	1	4
Rab38	0.399256	-1.52653	0.018	0.028	1	4
Prxl2c	0.0415887	-1.52358	0.079	0.127	1	4
Ifitm1	0.209179	-1.52322	0.065	0.042	1	4
Reck	0.917837	-1.5215	0.036	0.034	1	4
Xkrx	0.177184	-1.52042	0.004	0.014	1	4
Ssx2ip	0.276244	-1.52014	0.007	0.017	1	4
Cebpa	0.0773978	-1.51822	0.022	0.048	1	4
Dffb	0.400776	-1.51708	0.025	0.037	1	4
Susd1	0.116609	-1.51583	0.04	0.068	1	4
Art2a	0.00454478	-1.51545	0.04	0.099	1	4
Ccnf	0.741109	-1.51543	0.014	0.011	1	4
Ccdc15	0.0949443	-1.51498	0.036	0.065	1	4
Pbx4	0.97744	-1.51461	0.025	0.025	1	4
Lztr1	0.539084	-1.51343	0.058	0.068	1	4
Dcaf13	0.00214191	-1.51257	0.069	0.144	1	4
Tpmt	0.160137	-1.51152	0.018	0.037	1	4
Gm525	0.260649	-1.51045	0.011	0.023	1	4
Kcnd1	0.739394	-1.51012	0.014	0.011	1	4
Arl16	0.676248	-1.50992	0.018	0.023	1	4
Kctd11	0.401124	-1.50967	0.018	0.028	1	4
ENSMUSG00000079190	0.94875	-1.50946	0.011	0.011	1	4
2300009A05Rik	0.949705	-1.50743	0.051	0.051	1	4
Klrc3	0.184764	-1.50671	0.007	0.02	1	4
Dync2i2	0.0242382	-1.50612	0.007	0.034	1	4
Tbx5	0.21664	-1.50464	0.018	0.034	1	4
Samd10	0.838138	-1.50147	0.025	0.023	1	4
Fam174b	0.94875	-1.50086	0.011	0.011	1	4
Trmt44	0.291712	-1.50046	0.018	0.031	1	4
Tert	0.712137	-1.4998	0.011	0.014	1	4
Surf6	0.745151	-1.49969	0.043	0.048	1	4
Rad54b	0.0559947	-1.49929	0.007	0.028	1	4
Cdkl3	0.147752	-1.49819	0.032	0.056	1	4
Kctd10	0.34386	-1.49722	0.036	0.051	1	4
Laptm4b	0.103319	-1.49566	0.054	0.088	1	4
Rab4a	0.0529005	-1.49245	0.025	0.056	1	4
Sdc1	0.102102	-1.49233	0.025	0.051	1	4
Rab17	0.275243	-1.49212	0.007	0.017	1	4
Bcl2l2	0.41093	-1.4917	0.007	0.014	1	4
Ccl9	0.311624	-1.49162	0.025	0.04	1	4
Gm28044	0.076431	-1.49	0	0.011	1	4
Bcar3	0.08552	-1.48917	0.014	0.037	1	4
Dhfr	0.183262	-1.48649	0.011	0.025	1	4
Gm49356	0.328837	-1.48635	0.014	0.025	1	4
Slc36a4	0.0275577	-1.4856	0.011	0.04	1	4
D11Wsu47e	0.0277794	-1.48486	0.011	0.04	1	4
Dtd1	0.0579851	-1.48472	0.061	0.102	1	4
Cd22	0.952613	-1.48395	0.011	0.011	1	4
Atp5o	0.329723	-1.48196	0.014	0.025	1	4
Wwc2	0.134353	-1.4812	0.025	0.048	1	4
Usp30	0.793921	-1.48086	0.025	0.028	1	4
Polr1has	0.51262	-1.48052	0.025	0.034	1	4
Dnajc21	0.00342988	-1.48029	0.123	0.203	1	4
Obscn	0.366967	-1.47931	0.011	0.02	1	4
Mpeg1	0.0260452	-1.4788	0.054	0.102	1	4
Mocs1	0.556739	-1.47603	0.029	0.037	1	4
Hsf2bp	0.79222	-1.4759	0.014	0.017	1	4
Aldh1a2	0.0591622	-1.47273	0.018	0.045	1	4
Ttyh1	0.403936	-1.47264	0.018	0.028	1	4
Nlrc4	0.0541268	-1.46881	0.036	0.071	1	4
Antxr1	0.276244	-1.46829	0.007	0.017	1	4
Tmem87a	0.000220043	-1.46768	0.126	0.237	1	4
B4galt4	0.0837186	-1.46743	0.007	0.025	1	4
Isoc2b	0.837503	-1.46636	0.04	0.042	1	4
Katnal1	0.456718	-1.46515	0.029	0.04	1	4
Slc26a10	0.277246	-1.46347	0.007	0.017	1	4
Wnt5b	0.0654162	-1.46322	0.051	0.088	1	4
Prkab1	0.0957259	-1.46196	0.047	0.079	1	4
Spata24	0.259827	-1.46026	0.011	0.023	1	4
Dnajc22	0.511383	-1.45904	0.011	0.017	1	4
Pgam5	0.20789	-1.45899	0.065	0.09	1	4
2810459M11Rik	0.236408	-1.45749	0.014	0.028	1	4
Mapt	0.954545	-1.4559	0.011	0.011	1	4
Paqr8	0.478385	-1.45467	0.04	0.051	1	4
Ecm1	0.462798	-1.45279	0.022	0.031	1	4
Timm17a	0.019163	-1.45265	0.097	0.158	1	4
Fam78b	0.0197992	-1.4521	0.025	0.065	1	4
Naprt	0.258189	-1.4515	0.011	0.023	1	4
Kctd7	0.51691	-1.45122	0.011	0.017	1	4
Myzap	0.29468	-1.45083	0.018	0.031	1	4
Polr3a	0.0199199	-1.45057	0.061	0.113	1	4
Haus5	0.187161	-1.44968	0.032	0.054	1	4
Paqr5	0.28067	-1.44959	0.004	0.011	1	4
Ciapin1	0.284916	-1.44804	0.101	0.124	1	4
Ddx1	0.0213071	-1.44195	0.069	0.121	1	4
Gins2	0.366967	-1.43963	0.011	0.02	1	4
Plekhm1	0.297842	-1.4394	0.065	0.085	1	4
Erich1	0.0424574	-1.43825	0.072	0.119	1	4
Aga	0.0652721	-1.43782	0.051	0.088	1	4
Stom	0.108784	-1.43697	0.051	0.082	1	4
Cpne2	0.000757763	-1.43538	0.094	0.186	1	4
Mrpl51	0.0580617	-1.43505	0.105	0.15	1	4
Ecsit	0.0179982	-1.43436	0.029	0.071	1	4
Cers5	0.00254966	-1.43319	0.134	0.22	1	4
Chrne	0.278252	-1.43255	0.007	0.017	1	4
Usp45	0.0365067	-1.43253	0.04	0.079	1	4
Cep72	0.934252	-1.43153	0.018	0.017	1	4
Polg	0.0814402	-1.43153	0.054	0.09	1	4
Magee1	0.28027	-1.43076	0.007	0.017	1	4
Ticam2	0.259827	-1.43052	0.011	0.023	1	4
Trim45	0.770375	-1.43002	0.011	0.008	1	4
Nelfb	0.00905887	-1.42852	0.079	0.144	1	4
Marchf4	0.519685	-1.42784	0.011	0.017	1	4
Gpr4	0.95841	-1.42386	0.011	0.011	1	4
H2bc21	0.528445	-1.42282	0.018	0.025	1	4
Marchf8	0.0397301	-1.42277	0.025	0.059	1	4
Liph	0.28067	-1.42217	0.004	0.011	1	4
Icam5	0.279259	-1.41945	0.007	0.017	1	4
Rtl6	0.946819	-1.41859	0.011	0.011	1	4
Klhl2	2.02312e-05	-1.41814	0.087	0.209	0.334827	4
Sel1l3	0.160137	-1.41757	0.018	0.037	1	4
Fut7	0.0833721	-1.41651	0.007	0.025	1	4
Zfp282	0.0613591	-1.41616	0.032	0.065	1	4
Rtn4ip1	0.239839	-1.41403	0.014	0.028	1	4
Pcdh15	0.0581868	-1.41245	0.069	0.11	1	4
Sgcz	0.20326	-1.41231	0.022	0.04	1	4
Adamts10	0.0373682	-1.41204	0.061	0.107	1	4
Il17rb	0.076431	-1.41056	0	0.011	1	4
Prdm5	0.330612	-1.40882	0.014	0.025	1	4
Ykt6	0.234832	-1.40755	0.054	0.076	1	4
Snap47	0.0916925	-1.40446	0.047	0.079	1	4
Zfp296	0.160035	-1.40418	0.029	0.051	1	4
Ap5b1	0.596039	-1.40337	0.007	0.011	1	4
Elmo3	0.793788	-1.4032	0.014	0.017	1	4
Yipf5	0.000654651	-1.4031	0.076	0.164	1	4
Klrb1c	0.133663	-1.40092	0.025	0.048	1	4
Serpinc1	0.238462	-1.40089	0.014	0.028	1	4
Erg28	0.0378839	-1.39999	0.087	0.136	1	4
Gtpbp8	0.0427891	-1.39892	0.036	0.073	1	4
St3gal5	0.101557	-1.39855	0.025	0.051	1	4
Mgme1	0.660877	-1.39768	0.025	0.031	1	4
Ffar4	0.23618	-1.39739	0.025	0.042	1	4
Catsperg1	0.136438	-1.39713	0.025	0.048	1	4
Ubiad1	0.979488	-1.39695	0.014	0.014	1	4
Tmem101	0.450728	-1.39541	0.014	0.023	1	4
Chpt1	0.437275	-1.39343	0.036	0.048	1	4
Ddx20	0.695107	-1.39144	0.051	0.056	1	4
Spata2	0.0988431	-1.39078	0.047	0.079	1	4
Daxx	0.594088	-1.39077	0.072	0.082	1	4
Akap12	0.730839	-1.38924	0.014	0.011	1	4
Zfp358	0.529574	-1.38906	0.018	0.025	1	4
Cavin1	0.12026	-1.38816	0.014	0.034	1	4
Tmtc4	0.0663235	-1.38499	0.029	0.059	1	4
Eci1	0.38863	-1.38385	0.058	0.073	1	4
Sorcs1	0.639701	-1.38345	0.058	0.065	1	4
Mpv17l2	0.0268891	-1.38255	0.043	0.088	1	4
Fbxl13	0.279394	-1.38195	0.004	0.011	1	4
Fam76a	0.000987056	-1.38167	0.065	0.147	1	4
Iigp1	0.17887	-1.38017	0.004	0.014	1	4
Tdrkh	0.01098	-1.37996	0.025	0.071	1	4
Unc5c	0.146958	-1.37928	0.061	0.09	1	4
Mab21l3	0.00505815	-1.37861	0.029	0.082	1	4
Ampd1	0.076431	-1.378	0	0.011	1	4
Ppip5k1	0.73599	-1.37789	0.032	0.037	1	4
Il10rb	0.849883	-1.37742	0.025	0.023	1	4
Wrap53	0.140466	-1.37701	0.043	0.071	1	4
Rab23	0.323589	-1.37558	0.032	0.048	1	4
Tlr11	0.678866	-1.37536	0.018	0.023	1	4
Dcun1d4	0.684335	-1.37533	0.051	0.056	1	4
Gpd1l	0.478385	-1.37504	0.04	0.051	1	4
Pdzd11	0.0790116	-1.37436	0.061	0.099	1	4
Tnfrsf10b	0.650955	-1.37123	0.025	0.031	1	4
Gipc1	0.51619	-1.37051	0.061	0.073	1	4
Clnk	0.12274	-1.3684	0.079	0.113	1	4
Prkar2b	0.47463	-1.36745	0.04	0.051	1	4
Ephb4	0.114052	-1.36552	0.004	0.017	1	4
Zbtb6	0.318222	-1.36549	0.04	0.056	1	4
Tmsb10b	0.366077	-1.36463	0.054	0.071	1	4
Adcy9	0.135282	-1.36441	0.036	0.062	1	4
Polr3g	0.117017	-1.36333	0.018	0.04	1	4
Plscr3	0.43979	-1.36138	0.043	0.056	1	4
Acyp2	0.999563	-1.36052	0.058	0.056	1	4
Gas2l3	0.934252	-1.36041	0.018	0.017	1	4
Mtrf1	0.112946	-1.35825	0.004	0.017	1	4
Bahcc1	0.559604	-1.35566	0.047	0.056	1	4
Gemin5	0.0679534	-1.35552	0.029	0.059	1	4
Kcnq1	0.636732	-1.35462	0.025	0.031	1	4
Stam2	0.00218266	-1.35379	0.119	0.206	1	4
Rida	0.17553	-1.35359	0.025	0.045	1	4
Mtrf1l	0.0139488	-1.35337	0.025	0.068	1	4
Mast2	0.00783599	-1.35115	0.072	0.136	1	4
Tmem170	0.217809	-1.35089	0.018	0.034	1	4
Fkrp	0.188401	-1.35025	0.032	0.054	1	4
Ormdl3	0.243371	-1.34942	0.047	0.068	1	4
Tnnt2	0.608339	-1.34935	0.014	0.02	1	4
Ifi209	0.0305436	-1.34789	0.105	0.161	1	4
Ephx2	0.808474	-1.34775	0.025	0.028	1	4
Utp11	0.037347	-1.34724	0.119	0.172	1	4
Naa35	0.000730694	-1.34655	0.061	0.147	1	4
Zfp946	0.456331	-1.34354	0.014	0.023	1	4
Ilf2	0.0154168	-1.34345	0.116	0.178	1	4
Nod1	0.0129929	-1.34251	0.032	0.079	1	4
Stac2	0.597855	-1.34138	0.007	0.011	1	4
Cant1	0.0797265	-1.34118	0.043	0.076	1	4
Knl1	0.28067	-1.34086	0.004	0.011	1	4
Atic	0.543433	-1.34011	0.076	0.088	1	4
Dlgap1	0.605625	-1.33856	0.014	0.02	1	4
Ptprf	0.183875	-1.3379	0.011	0.025	1	4
Sgcd	0.433108	-1.33787	0.054	0.068	1	4
Gpr160	0.0869383	-1.3373	0.011	0.031	1	4
Pstpip2	0.175187	-1.33629	0.014	0.031	1	4
Cln5	0.0698703	-1.33618	0.072	0.113	1	4
Wee1	0.0424936	-1.33602	0.083	0.133	1	4
Txndc17	0.00847081	-1.33488	0.231	0.319	1	4
Timm22	0.0428057	-1.33188	0.072	0.119	1	4
Tcf7l1	0.19236	-1.33174	0.047	0.071	1	4
Vkorc1	0.0167197	-1.33167	0.04	0.088	1	4
Lilrb4a	0.468527	-1.33112	0.029	0.04	1	4
Ctsf	0.18204	-1.33066	0.011	0.025	1	4
Pigt	0.482564	-1.32889	0.069	0.082	1	4
Siglec15	0.705378	-1.32858	0.011	0.014	1	4
Zfp54	0.0844151	-1.3277	0.007	0.025	1	4
Krtcap3	0.18204	-1.3274	0.011	0.025	1	4
Slco1a5	0.028832	-1.32598	0.014	0.045	1	4
Suox	0.266209	-1.32335	0.022	0.037	1	4
Zswim4	0.0354739	-1.32219	0.083	0.133	1	4
Ddx19b	0.105823	-1.32174	0.054	0.088	1	4
Coil	0.889777	-1.32144	0.054	0.051	1	4
Asprv1	0.0542997	-1.32137	0.025	0.056	1	4
Ttyh2	0.0409739	-1.32125	0.04	0.079	1	4
Hic2	0.486141	-1.32078	0.032	0.042	1	4
Cc2d1a	0.149457	-1.3199	0.032	0.056	1	4
Nfib	0.41093	-1.31983	0.007	0.014	1	4
Iqsec2	0.413079	-1.31858	0.025	0.037	1	4
Extl2	0.0830267	-1.31822	0.007	0.025	1	4
Mon1b	0.397207	-1.31727	0.043	0.056	1	4
Tomm40l	0.1222	-1.31695	0.014	0.034	1	4
Tnni2	0.0447109	-1.31581	0.043	0.082	1	4
Nme2	0.0216369	-1.31432	0.051	0.099	1	4
Herc6	0.000223792	-1.31419	0.108	0.218	1	4
Dnah7c	0.114052	-1.31257	0.004	0.017	1	4
Zfp532	0.00621003	-1.31245	0.032	0.085	1	4
Rorc	0.112325	-1.31029	0.032	0.059	1	4
Or2v1	0.373485	-1.30963	0.011	0.02	1	4
Creb5	0.534618	-1.30942	0.051	0.04	1	4
Nectin4	0.279259	-1.30782	0.007	0.017	1	4
Aagab	0.0548973	-1.3064	0.112	0.161	1	4
Serp2	0.184056	-1.3038	0.007	0.02	1	4
Vps26b	0.103343	-1.30361	0.047	0.079	1	4
AI837181	0.220008	-1.30328	0.065	0.09	1	4
Tha1	0.368048	-1.30256	0.011	0.02	1	4
Fbxo4	0.0705985	-1.30246	0.058	0.096	1	4
Ttll1	0.790652	-1.30191	0.014	0.017	1	4
Naaa	0.295426	-1.30132	0.018	0.031	1	4
Gm26992	0.00683781	-1.30073	0.108	0.184	1	4
Ulk3	0.0840663	-1.30063	0.007	0.025	1	4
Ctsd	0.0246092	-1.29994	0.116	0.175	1	4
Il1rapl1	0.126469	-1.29754	0.011	0.028	1	4
Neo1	0.00242505	-1.29701	0.011	0.056	1	4
Wdr4	0.552243	-1.29507	0.058	0.068	1	4
2310057M21Rik	0.939322	-1.29422	0.032	0.031	1	4
Nrarp	0.114052	-1.2942	0.004	0.017	1	4
Snx15	0.0942983	-1.2936	0.047	0.079	1	4
Nup62cl	0.178026	-1.29263	0.004	0.014	1	4
Lztfl1	0.0156882	-1.29165	0.112	0.175	1	4
Tk1	0.244701	-1.29102	0.014	0.028	1	4
Kcnn3	0.629935	-1.29073	0.032	0.04	1	4
Fhl3	0.480487	-1.28975	0.025	0.017	1	4
Ophn1	0.28027	-1.28971	0.007	0.017	1	4
Atraid	0.00644782	-1.28923	0.097	0.172	1	4
Ttl	0.455208	-1.28902	0.014	0.023	1	4
Racgap1	0.918582	-1.28886	0.032	0.031	1	4
Lrrc40	0.0377731	-1.28719	0.029	0.065	1	4
Lingo4	0.770375	-1.28638	0.011	0.008	1	4
Mfn2	0.192909	-1.28556	0.04	0.062	1	4
Cad	0.814701	-1.28211	0.036	0.04	1	4
Dixdc1	0.187618	-1.28193	0.007	0.02	1	4
Grin2d	0.412311	-1.28081	0.007	0.014	1	4
Idh1	0.0119075	-1.28012	0.13	0.201	1	4
Clu	0.00338702	-1.27913	0.069	0.141	1	4
Lamc1	0.00936174	-1.27893	0.036	0.088	1	4
Adam9	0.0190152	-1.27808	0.069	0.124	1	4
Traf3ip1	0.159684	-1.27741	0.018	0.037	1	4
Trim5	0.03076	-1.27727	0.051	0.096	1	4
Gm3739	0.0401636	-1.27645	0.022	0.054	1	4
Hadh	0.111288	-1.2737	0.069	0.102	1	4
Gpatch11	0.124176	-1.27316	0.061	0.093	1	4
Rhot2	0.00709826	-1.27026	0.032	0.085	1	4
Myo1b	0.515495	-1.26951	0.025	0.034	1	4
Glt8d1	0.00201649	-1.26877	0.04	0.105	1	4
Ccr2	0.00940491	-1.2685	0.029	0.076	1	4
Mr1	0.41093	-1.26832	0.007	0.014	1	4
Ifi206	0.00477731	-1.26761	0.029	0.082	1	4
H4c6	0.0471381	-1.26625	0.004	0.023	1	4
Fdps	0.0736557	-1.26614	0.061	0.099	1	4
Rab19	0.60748	-1.2642	0.04	0.048	1	4
Dmrt2	0.712137	-1.26309	0.011	0.014	1	4
F8	0.0195877	-1.26104	0.004	0.028	1	4
Fbxo21	0.0809177	-1.25848	0.032	0.062	1	4
Xlr4b	0.00485289	-1.25732	0.025	0.076	1	4
Zxdb	0.13749	-1.25679	0.025	0.048	1	4
Acvr1b	0.832515	-1.25662	0.04	0.042	1	4
Ppp1r37	0.138727	-1.25645	0.065	0.096	1	4
Klhdc1	0.240905	-1.25544	0.054	0.076	1	4
Cxcr6	0.645744	-1.25476	0.058	0.065	1	4
Rassf8	0.409776	-1.25456	0.025	0.037	1	4
Gas2l1	0.0929896	-1.25381	0.04	0.071	1	4
5730480H06Rik	0.132281	-1.25272	0.036	0.062	1	4
Zbtb8a	0.664198	-1.25241	0.025	0.031	1	4
Camsap3	0.279394	-1.25172	0.004	0.011	1	4
Pgap1	0.24644	-1.25147	0.047	0.068	1	4
Garin3	0.596039	-1.25095	0.007	0.011	1	4
Igtp	0.580751	-1.24864	0.029	0.037	1	4
Dgcr2	0.193844	-1.24863	0.032	0.054	1	4
Toe1	0.844464	-1.24802	0.051	0.054	1	4
Traf3ip2	0.0704437	-1.24747	0.061	0.099	1	4
Zfp867	0.00709741	-1.24741	0.007	0.042	1	4
Ubap1	0.157871	-1.24596	0.097	0.13	1	4
Crot	0.00606267	-1.24221	0.04	0.096	1	4
Prkcg	0.125146	-1.24106	0.029	0.054	1	4
Zbtb25	0.0273199	-1.24048	0.054	0.102	1	4
Gcfc2	0.893542	-1.24047	0.032	0.034	1	4
Nectin3	0.551191	-1.24016	0.047	0.056	1	4
Cnot9	0.0760894	-1.24007	0.072	0.113	1	4
Mfsd4a	0.419511	-1.23994	0.043	0.056	1	4
Zfp280b	0.397723	-1.23992	0.032	0.045	1	4
Tcerg1l	0.0482187	-1.23986	0.043	0.082	1	4
Ankrd13b	0.374578	-1.23975	0.011	0.02	1	4
Plekhf2	0.0717943	-1.23922	0.079	0.119	1	4
Ankrd46	0.0646384	-1.23827	0.032	0.065	1	4
Hk3	0.712137	-1.23781	0.011	0.014	1	4
Zfp560	0.378814	-1.23711	0.097	0.116	1	4
Batf	0.429807	-1.23617	0.076	0.093	1	4
Tmem50b	0.504447	-1.23508	0.072	0.085	1	4
Kcnmb4	0.157848	-1.23333	0.032	0.056	1	4
Cchcr1	0.0790029	-1.23318	0.022	0.048	1	4
Trmt10b	0.335973	-1.23182	0.014	0.025	1	4
Rabepk	0.144355	-1.23168	0.076	0.107	1	4
Dsel	0.41093	-1.23113	0.007	0.014	1	4
Plpp3	0.185105	-1.22967	0.011	0.025	1	4
Enoph1	0.491436	-1.22907	0.065	0.051	1	4
Hes7	0.28067	-1.22854	0.004	0.011	1	4
Cage1	0.403218	-1.22754	0.025	0.037	1	4
Tsen34	0.294287	-1.22702	0.069	0.09	1	4
Tmub2	0.0776581	-1.2265	0.047	0.082	1	4
Tusc1	0.799276	-1.22602	0.036	0.04	1	4
Pygm	0.608339	-1.22478	0.014	0.02	1	4
Gstk1	0.277246	-1.22313	0.007	0.017	1	4
Cpeb3	0.041119	-1.223	0.014	0.042	1	4
Thyn1	0.0466153	-1.22263	0.047	0.088	1	4
E2f6	0.244002	-1.22113	0.014	0.028	1	4
Tmem151b	0.103199	-1.2206	0.025	0.051	1	4
Tomm6	0.0533831	-1.22025	0.058	0.099	1	4
Ppm1l	0.00633389	-1.21832	0.116	0.195	1	4
Hif1an	0.0855068	-1.21788	0.043	0.076	1	4
Fads2	0.295426	-1.21743	0.018	0.031	1	4
Spry2	0.102223	-1.21724	0.083	0.121	1	4
Gprin3	0.0124804	-1.21713	0.054	0.11	1	4
Mtr	0.00695147	-1.21689	0.065	0.13	1	4
Bsn	0.804788	-1.216	0.014	0.017	1	4
Camkk2	0.16995	-1.21462	0.13	0.161	1	4
Bivm	0.484216	-1.21455	0.018	0.011	1	4
Rabl3	0.186749	-1.21428	0.032	0.054	1	4
Zbtb12	0.764343	-1.21238	0.032	0.037	1	4
Alkbh7	0.46787	-1.21216	0.047	0.059	1	4
Smarcal1	0.974431	-1.2121	0.054	0.054	1	4
Rad54l2	0.161663	-1.21124	0.108	0.141	1	4
Rec114	0.278123	-1.21029	0.004	0.011	1	4
Cacna2d2	0.263093	-1.21018	0.014	0.006	1	4
Mlf1	0.0109662	-1.20794	0.043	0.096	1	4
Trmt6	0.0176252	-1.20714	0.105	0.167	1	4
Ebpl	0.397653	-1.20601	0.065	0.082	1	4
Lrrc63	0.118763	-1.20598	0.018	0.04	1	4
Gemin2	0.746988	-1.20478	0.043	0.048	1	4
Bahd1	0.0572907	-1.20462	0.058	0.099	1	4
Gm37988	0.332392	-1.20461	0.014	0.025	1	4
Coa8	0.0302232	-1.20155	0.123	0.178	1	4
Cep85	0.152315	-1.20116	0.072	0.105	1	4
Zranb3	0.172024	-1.20096	0.014	0.031	1	4
Fam3d	0.449613	-1.20093	0.014	0.023	1	4
Gtf2ird1	0.227017	-1.20059	0.051	0.073	1	4
Dync2i1	0.412311	-1.19992	0.007	0.014	1	4
Gm49711	0.28067	-1.19974	0.004	0.011	1	4
Slc31a1	0.037288	-1.19887	0.029	0.065	1	4
Wdr86	0.184489	-1.19811	0.011	0.025	1	4
Wnt9a	0.178026	-1.19777	0.004	0.014	1	4
Shf	0.0851064	-1.19716	0.018	0.042	1	4
Nacc2	0.149411	-1.1969	0.022	0.042	1	4
Tacc2	0.0869568	-1.19663	0.014	0.037	1	4
Arhgef5	0.764377	-1.19631	0.011	0.008	1	4
Wdr17	0.710457	-1.19488	0.018	0.014	1	4
Slc35g1	0.274245	-1.19443	0.007	0.017	1	4
Yipf6	0.228301	-1.19442	0.043	0.065	1	4
Psph	0.277066	-1.19382	0.069	0.09	1	4
Mcoln1	0.139257	-1.19324	0.025	0.048	1	4
Slc25a32	0.112865	-1.193	0.032	0.059	1	4
Rnf43	0.00940923	-1.1927	0.083	0.15	1	4
Akr1e1	0.000365068	-1.19176	0.025	0.096	1	4
Slc39a8	0.178026	-1.19153	0.004	0.014	1	4
Hfm1	0.278252	-1.19087	0.007	0.017	1	4
Sntb1	0.154182	-1.19034	0.076	0.107	1	4
Rasgrp1	0.0229151	-1.18939	0.141	0.203	1	4
Fam219a	0.28454	-1.18852	0.069	0.09	1	4
Zfp329	0.27404	-1.18668	0.058	0.079	1	4
Tagap1	0.311624	-1.18655	0.025	0.04	1	4
Akr1b10	0.21873	-1.18654	0.058	0.082	1	4
Gna15	0.687434	-1.18553	0.036	0.042	1	4
Odf2l	0.220779	-1.18518	0.04	0.062	1	4
Rbm47	0.000448754	-1.18502	0.105	0.209	1	4
Samd15	0.114052	-1.18444	0.004	0.017	1	4
Ensa	0.00209187	-1.18356	0.166	0.257	1	4
F8a	0.145063	-1.1826	0.022	0.042	1	4
Gm19684	0.0762326	-1.18208	0.072	0.113	1	4
Armc8	0.0108224	-1.18124	0.101	0.167	1	4
Col4a5	0.412311	-1.18118	0.007	0.014	1	4
Tns3	0.0507185	-1.17859	0.17	0.226	1	4
Commd2	0.019452	-1.17796	0.076	0.13	1	4
Cfap20dc	0.0840663	-1.17629	0.007	0.025	1	4
Pifo	0.707066	-1.1747	0.011	0.014	1	4
Cpsf1	0.0747896	-1.17386	0.047	0.082	1	4
Caskin2	0.710445	-1.17304	0.011	0.014	1	4
Tbc1d12	0.037326	-1.1713	0.065	0.113	1	4
Stx3	0.174128	-1.17091	0.014	0.031	1	4
Xrcc5	0.288649	-1.17071	0.043	0.062	1	4
Nol4l	0.00538558	-1.1702	0.061	0.127	1	4
Plxna4	0.332392	-1.16995	0.014	0.025	1	4
Stoml2	0.0298722	-1.1696	0.061	0.11	1	4
Itpripl2	0.842122	-1.1693	0.047	0.042	1	4
Rtl8a	0.403561	-1.16907	0.032	0.045	1	4
Qsox2	0.149811	-1.16796	0.022	0.042	1	4
Nmnat2	0.604423	-1.1662	0.032	0.025	1	4
Gli3	0.0133002	-1.16614	0.061	0.119	1	4
Rab3d	0.908053	-1.16381	0.018	0.017	1	4
Thap7	0.0944906	-1.1636	0.04	0.071	1	4
Dtx3l	0.0161367	-1.16343	0.083	0.141	1	4
Ly96	0.154592	-1.16327	0.069	0.099	1	4
Gpt	0.708755	-1.16314	0.011	0.014	1	4
Mad2l1bp	0.32051	-1.16286	0.025	0.04	1	4
Clpb	0.0067949	-1.1617	0.051	0.11	1	4
Herpud2	0.00605073	-1.16124	0.079	0.15	1	4
Rbbp9	0.17887	-1.1599	0.004	0.014	1	4
Alas1	0.277392	-1.15805	0.04	0.059	1	4
Mms22l	0.694346	-1.15805	0.069	0.076	1	4
Dntt	0.952613	-1.15712	0.011	0.011	1	4
Med28	0.0568986	-1.15619	0.13	0.184	1	4
Slc25a20	0.706586	-1.15475	0.061	0.068	1	4
Aif1	0.0272598	-1.15407	0.097	0.155	1	4
Pon3	0.121421	-1.15351	0.014	0.034	1	4
4930558K02Rik	0.984616	-1.15234	0.014	0.014	1	4
9130401M01Rik	0.29916	-1.15185	0.079	0.102	1	4
Taf6	0.360273	-1.15175	0.029	0.042	1	4
Espl1	0.172548	-1.15116	0.014	0.031	1	4
Dennd6b	0.299171	-1.15068	0.018	0.031	1	4
Fcgrt	0.509753	-1.1495	0.025	0.034	1	4
Ttc13	0.0296659	-1.14831	0.051	0.096	1	4
Nhlrc2	0.0277183	-1.14813	0.134	0.195	1	4
Zfp248	0.601495	-1.14793	0.007	0.011	1	4
Cebpg	0.00896296	-1.14758	0.105	0.175	1	4
Ctps	0.486973	-1.14717	0.032	0.042	1	4
Fam53a	0.0678078	-1.14429	0.065	0.105	1	4
Sv2a	0.277246	-1.14352	0.007	0.017	1	4
Med19	0.049304	-1.14302	0.069	0.113	1	4
Srp68	0.048732	-1.14283	0.076	0.121	1	4
Nup43	0.317072	-1.14278	0.025	0.04	1	4
Cdc23	0.0250093	-1.14272	0.029	0.068	1	4
Phyh	0.0327219	-1.14248	0.083	0.136	1	4
AI987944	0.0985747	-1.14212	0.112	0.153	1	4
Ncald	0.0561866	-1.14195	0.072	0.116	1	4
Ttc23	0.954545	-1.13869	0.011	0.011	1	4
Bet1	0.551215	-1.13803	0.069	0.079	1	4
Tomm5	0.0231555	-1.13788	0.155	0.22	1	4
Abcb8	0.305991	-1.1376	0.018	0.031	1	4
Pmpcb	0.458425	-1.13757	0.087	0.102	1	4
Angptl6	0.977779	-1.1356	0.014	0.014	1	4
Col6a6	0.0891872	-1.13412	0.011	0.031	1	4
Apmap	0.133203	-1.13379	0.069	0.102	1	4
Zfp709	0.0585668	-1.13151	0.036	0.071	1	4
Zdhhc1	0.170223	-1.13067	0.04	0.065	1	4
Klra1	0.766375	-1.13013	0.011	0.008	1	4
P2ry10b	0.40206	-1.1296	0.018	0.028	1	4
Gm44973	0.597855	-1.12889	0.007	0.011	1	4
Grpr	0.408953	-1.12841	0.025	0.037	1	4
Get3	0.343177	-1.12839	0.058	0.076	1	4
Cmc2	0.128872	-1.12799	0.047	0.076	1	4
Trim2	0.0268644	-1.12696	0.029	0.068	1	4
Zbtb40	0.148432	-1.12651	0.032	0.056	1	4
Tmem178b	0.28067	-1.12608	0.004	0.011	1	4
Zfp874b	0.646565	-1.12566	0.025	0.031	1	4
Tusc2	0.0557296	-1.1228	0.025	0.056	1	4
Yap1	0.712137	-1.12262	0.011	0.014	1	4
Slc24a5	0.370217	-1.1224	0.011	0.02	1	4
Zfp618	0.362412	-1.12224	0.029	0.042	1	4
Brat1	0.217068	-1.12179	0.029	0.048	1	4
Acvrl1	0.114052	-1.12052	0.004	0.017	1	4
Ptp4a1	0.042352	-1.11968	0.058	0.102	1	4
Dhrs1	0.286003	-1.11874	0.029	0.045	1	4
Nsun4	0.0232421	-1.11744	0.047	0.093	1	4
Jdp2	0.324554	-1.1166	0.054	0.073	1	4
Cd84	0.335193	-1.1159	0.079	0.099	1	4
Ube2l6	0.00164662	-1.11554	0.065	0.144	1	4
Zdhhc23	0.0242382	-1.11364	0.007	0.034	1	4
Tepsin	0.103199	-1.11332	0.025	0.051	1	4
Loxl3	0.101676	-1.11331	0.054	0.088	1	4
B3galnt2	0.00364887	-1.11171	0.032	0.09	1	4
Gbp5	0.0048833	-1.11162	0.076	0.147	1	4
Mdfic	0.00929739	-1.10889	0.195	0.28	1	4
Klf8	0.0202352	-1.10887	0.079	0.138	1	4
Dnajb14	0.000965565	-1.10736	0.108	0.206	1	4
Trp53i11	0.174294	-1.1069	0.058	0.085	1	4
Lacc1	0.0813788	-1.10681	0.076	0.116	1	4
Rras	0.0972646	-1.10536	0.054	0.088	1	4
Septin10	0.317984	-1.10526	0.032	0.048	1	4
Pank1	0.0572476	-1.10462	0.036	0.071	1	4
Zfp322a	0.021027	-1.10411	0.061	0.113	1	4
Cenpv	0.357106	-1.10371	0.022	0.034	1	4
Pigg	0.0106023	-1.1023	0.007	0.04	1	4
Arhgap44	0.270063	-1.10114	0.022	0.037	1	4
1700037H04Rik	0.263661	-1.10085	0.022	0.037	1	4
Pold3	0.129242	-1.10066	0.087	0.121	1	4
Sdhaf2	0.00520515	-1.09901	0.087	0.158	1	4
Mis18a	0.0936042	-1.09793	0.029	0.056	1	4
Polr3f	0.222819	-1.09772	0.036	0.056	1	4
Gtf2e2	0.20182	-1.09717	0.116	0.147	1	4
Matcap1	0.0614817	-1.09707	0.014	0.04	1	4
Mapk10	0.925112	-1.09697	0.022	0.023	1	4
Zfp974	0.0603122	-1.09613	0.011	0.034	1	4
Tspan31	0.00858422	-1.09565	0.065	0.127	1	4
Dhx37	0.439065	-1.09552	0.051	0.065	1	4
Zfp426	0.140466	-1.09495	0.043	0.071	1	4
Fam131a	0.0610926	-1.09422	0.018	0.045	1	4
Glcci1	0.450721	-1.09318	0.036	0.048	1	4
Exosc8	0.268604	-1.09274	0.126	0.153	1	4
Mfap1b	0.15155	-1.09162	0.094	0.127	1	4
Gnptg	0.843292	-1.09141	0.079	0.073	1	4
Mthfd1l	0.146976	-1.09106	0.09	0.124	1	4
Or1o1	0.28195	-1.0904	0.004	0.011	1	4
Itga1	0.608339	-1.08765	0.014	0.02	1	4
Emc9	0.276634	-1.08763	0.036	0.054	1	4
Sumf1	0.145722	-1.08747	0.058	0.088	1	4
Shroom1	0.471129	-1.08717	0.011	0.006	1	4
Unc119	0.351588	-1.087	0.072	0.09	1	4
Ddx51	0.364559	-1.08645	0.029	0.042	1	4
Glis3	0.505327	-1.08604	0.051	0.062	1	4
Lpgat1	0.03084	-1.08603	0.087	0.141	1	4
Hspe1-rs1	0.478265	-1.08393	0.025	0.017	1	4
Zfp423	0.361698	-1.08391	0.029	0.042	1	4
Dennd10	0.0141077	-1.08355	0.029	0.073	1	4
Slc39a1	0.218322	-1.08321	0.051	0.073	1	4
Rft1	0.0808703	-1.08222	0.022	0.048	1	4
Slc22a21	0.113924	-1.08192	0.018	0.04	1	4
Spred3	0.00974907	-1.08153	0.014	0.054	1	4
Snx12	0.126651	-1.08089	0.09	0.127	1	4
Tead1	0.950681	-1.08049	0.011	0.011	1	4
Mcm4	0.145749	-1.08013	0.065	0.096	1	4
Ccdc22	0.441782	-1.07995	0.029	0.04	1	4
Bend3	0.241221	-1.07809	0.014	0.028	1	4
Gstcd	0.078119	-1.07791	0.079	0.121	1	4
Cnn3	0.166057	-1.07716	0.04	0.065	1	4
Tmem69	0.479843	-1.07696	0.022	0.014	1	4
Cdca7	0.279259	-1.07618	0.007	0.017	1	4
Cep112	0.570401	-1.0759	0.047	0.056	1	4
Cacna1d	0.76851	-1.07586	0.047	0.051	1	4
Acat1	0.273979	-1.07545	0.123	0.15	1	4
Phf24	0.0466014	-1.07475	0.058	0.102	1	4
Cbr1	0.276099	-1.07447	0.036	0.054	1	4
Sgce	0.486347	-1.07418	0.014	0.008	1	4
R3hdm4	0.0304627	-1.073	0.112	0.169	1	4
Rad18	0.270775	-1.07261	0.076	0.099	1	4
Tmem154	0.369595	-1.07244	0.036	0.051	1	4
Zfp458	0.298419	-1.07193	0.018	0.031	1	4
Aldh6a1	0.29692	-1.07156	0.018	0.031	1	4
Slc25a42	0.0393164	-1.07145	0.029	0.065	1	4
Bbs4	0.198664	-1.07075	0.022	0.04	1	4
Zfp882	0.770375	-1.0706	0.011	0.008	1	4
Smim8	0.206273	-1.0695	0.094	0.121	1	4
Lrrc25	0.52282	-1.06928	0.018	0.025	1	4
Pde4a	0.0900111	-1.06868	0.101	0.144	1	4
Ffar2	0.18204	-1.06803	0.011	0.025	1	4
Dph1	0.413696	-1.0665	0.007	0.014	1	4
Wdtc1	0.0155493	-1.06648	0.076	0.136	1	4
Dand5	0.455208	-1.06474	0.014	0.023	1	4
Comt	0.0713601	-1.06449	0.079	0.124	1	4
Mindy1	0.902507	-1.06447	0.032	0.034	1	4
Als2cl	0.301433	-1.06389	0.018	0.031	1	4
R3hcc1	0.261634	-1.06244	0.032	0.051	1	4
AW209491	0.278252	-1.05996	0.007	0.017	1	4
Bysl	0.122983	-1.0599	0.014	0.034	1	4
Irgm2	0.0571515	-1.0599	0.022	0.051	1	4
Harbi1	0.404876	-1.05956	0.018	0.028	1	4
Tcp11l1	0.11288	-1.05944	0.043	0.073	1	4
Zc3hc1	0.481401	-1.059	0.04	0.051	1	4
Slc11a2	0.0932891	-1.05826	0.047	0.079	1	4
Foxj2	0.0169532	-1.05706	0.04	0.088	1	4
Vwa8	0.0508094	-1.05669	0.083	0.13	1	4
Rmdn3	0.13749	-1.05646	0.025	0.048	1	4
B3gnt3	0.594226	-1.05628	0.007	0.011	1	4
Dnase1l1	0.0682029	-1.05524	0.051	0.088	1	4
Tctn3	0.217809	-1.05507	0.018	0.034	1	4
Ugp2	0.0695179	-1.05441	0.065	0.105	1	4
Smpd1	0.743788	-1.05439	0.022	0.025	1	4
Dip2a	0.408953	-1.054	0.025	0.037	1	4
Gng12	0.0300603	-1.05353	0.101	0.158	1	4
Kif26b	0.162645	-1.0533	0.04	0.065	1	4
Hs3st3a1	0.241914	-1.05156	0.014	0.028	1	4
Rbfox1	0.611058	-1.05128	0.014	0.02	1	4
Fam210b	0.145997	-1.05105	0.051	0.079	1	4
Elac1	0.00741483	-1.05072	0.025	0.073	1	4
B3gntl1	0.0327615	-1.05026	0.054	0.099	1	4
Nxnl2	0.279394	-1.05018	0.004	0.011	1	4
Irak1bp1	0.852506	-1.0501	0.04	0.042	1	4
Alad	0.0281906	-1.04927	0.025	0.062	1	4
Gtf3c3	0.706752	-1.04897	0.072	0.079	1	4
Abhd6	0.194267	-1.04845	0.032	0.054	1	4
Srebf2	0.00296667	-1.04804	0.188	0.277	1	4
Washc5	0.0386187	-1.04687	0.061	0.107	1	4
Ero1a	0.0830506	-1.04667	0.087	0.13	1	4
Lrrc28	0.256783	-1.04587	0.054	0.076	1	4
Impdh1	0.91227	-1.04581	0.061	0.062	1	4
Tgfbrap1	0.0122272	-1.04356	0.054	0.11	1	4
Deptor	0.418379	-1.04346	0.032	0.045	1	4
Slc7a11	0.0213989	-1.04208	0.108	0.172	1	4
Ptcd2	9.95433e-05	-1.04191	0.119	0.24	1	4
Mapre3	0.415358	-1.0406	0.04	0.054	1	4
Kcnn1	0.00657867	-1.03947	0.014	0.056	1	4
Gatad2a	0.000187032	-1.03935	0.166	0.285	1	4
Rdh11	0.03266	-1.03923	0.032	0.071	1	4
Mapk9	0.298411	-1.03766	0.101	0.124	1	4
3110040N11Rik	0.375546	-1.03743	0.054	0.071	1	4
Tbc1d22b	0.092667	-1.03732	0.072	0.11	1	4
Manea	0.42576	-1.03717	0.051	0.065	1	4
Desi2	0.00314332	-1.03707	0.108	0.192	1	4
Tmem209	0.132634	-1.03683	0.025	0.048	1	4
Irgm1	0.168137	-1.03679	0.036	0.059	1	4
Six1	0.191231	-1.03674	0.007	0.02	1	4
Optn	0.0402903	-1.03648	0.022	0.054	1	4
Tg	0.185105	-1.03631	0.011	0.025	1	4
Adrm1	0.0202424	-1.03511	0.083	0.141	1	4
Dcaf12l2	0.770375	-1.03433	0.011	0.008	1	4
Slc39a3	0.475778	-1.03298	0.014	0.008	1	4
Qrsl1	0.282567	-1.03282	0.036	0.054	1	4
Pgm1	0.0270427	-1.03217	0.051	0.096	1	4
1700001K19Rik	0.759068	-1.03211	0.032	0.037	1	4
Znhit3	0.321139	-1.03188	0.043	0.028	1	4
Trim30a	0.000782241	-1.03102	0.116	0.218	1	4
Sertad3	0.652341	-1.02936	0.043	0.051	1	4
Kbtbd4	0.639926	-1.029	0.029	0.023	1	4
Snx6	0.0442214	-1.02892	0.155	0.215	1	4
Ifit1bl1	0.94875	-1.02843	0.011	0.011	1	4
Tcta	0.109294	-1.02835	0.022	0.045	1	4
Gzmc	0.982906	-1.02787	0.014	0.014	1	4
Fstl4	0.799976	-1.02753	0.025	0.028	1	4
Gm21972	0.114052	-1.02683	0.004	0.017	1	4
Dhrs4	0.891948	-1.02676	0.083	0.085	1	4
Sntb2	0.0676156	-1.02542	0.069	0.11	1	4
Mrpl18	0.00230339	-1.02541	0.112	0.201	1	4
Entpd5	0.868951	-1.02541	0.029	0.031	1	4
Zfp300	0.17887	-1.02522	0.004	0.014	1	4
Zfp623	0.187618	-1.02468	0.007	0.02	1	4
Aldh18a1	0.448464	-1.0237	0.036	0.048	1	4
Dnah6	0.260649	-1.02344	0.011	0.023	1	4
Ubl4a	0.786436	-1.0221	0.054	0.059	1	4
Rbm17	0.0410658	-1.02185	0.159	0.215	1	4
Cep126	0.525077	-1.02121	0.054	0.065	1	4
Rwdd2a	0.28195	-1.02002	0.004	0.011	1	4
Ei24	0.466809	-1.0198	0.076	0.09	1	4
Nrg4	0.263125	-1.01959	0.011	0.023	1	4
Pak6	0.279259	-1.01795	0.007	0.017	1	4
Nrn1	0.0672661	-1.01744	0.054	0.093	1	4
Inpp5e	0.243305	-1.01742	0.014	0.028	1	4
Elp4	0.128976	-1.01719	0.105	0.141	1	4
Prg3	0.02617	-1.01668	0.032	0.073	1	4
Acss1	0.518136	-1.01591	0.043	0.054	1	4
Adarb2	0.0569652	-1.01586	0.072	0.116	1	4
Tmx2	0.518323	-1.01559	0.036	0.045	1	4
Amigo1	0.798497	-1.01549	0.014	0.017	1	4
Trp53rkb	0.864866	-1.01507	0.018	0.02	1	4
Fam3b	0.373485	-1.01445	0.011	0.02	1	4
Spast	0.0550392	-1.01443	0.13	0.184	1	4
Fbxw7	0.000346713	-1.01433	0.159	0.277	1	4
Acsf3	0.194643	-1.01426	0.022	0.04	1	4
H3c4	0.0299795	-1.01342	0.022	0.056	1	4
Wnt10a	0.46761	-1.01186	0.011	0.006	1	4
Akap17b	0.369131	-1.01172	0.011	0.02	1	4
Chst3	0.0416032	-1.01137	0.04	0.079	1	4
Nol10	0.337212	-1.0108	0.097	0.119	1	4
Pkd1	0.063016	-1.00989	0.097	0.144	1	4
Itfg1	0.0100803	-1.00884	0.152	0.226	1	4
Whrn	0.563247	-1.00856	0.09	0.102	1	4
Camk1	0.278252	-1.00808	0.007	0.017	1	4
Maoa	0.571088	-1.008	0.029	0.037	1	4
Atg4a	0.0839113	-1.00787	0.144	0.192	1	4
Hs6st2	0.0783459	-1.00765	0.047	0.082	1	4
Jmjd7	0.28195	-1.00754	0.004	0.011	1	4
Chrm3	0.717221	-1.00752	0.011	0.014	1	4
Thnsl2	0.283233	-1.00611	0.004	0.011	1	4
Ctnnd1	0.40206	-1.00588	0.018	0.028	1	4
Dok2	0.0390365	-1.00569	0.051	0.093	1	4
Afmid	0.244002	-1.00526	0.014	0.028	1	4
Pla2g7	0.0837186	-1.00479	0.007	0.025	1	4
Flad1	0.0139283	-1.00473	0.032	0.079	1	4
Mtres1	0.640833	-1.00465	0.025	0.02	1	4
Uggt2	0.597855	-1.00463	0.007	0.011	1	4
Ssrp1	0.0154053	-1.00416	0.116	0.181	1	4
Ggact	0.399178	-1.0039	0.032	0.045	1	4
Selenoi	0.0999357	-1.00259	0.025	0.051	1	4
Gmnn	0.185838	-1.00226	0.036	0.059	1	4
Ly6c2	0.366969	-1.00143	0.036	0.051	1	4
Slc25a39	0.651051	-0.999218	0.058	0.065	1	4
Dcaf7	0.154242	-0.998539	0.112	0.15	1	4
Trim14	0.00282998	-0.998452	0.072	0.147	1	4
Cacnb4	0.529025	-0.998326	0.025	0.034	1	4
Cadps2	0.0875369	-0.998132	0.014	0.037	1	4
Milr1	0.13772	-0.997326	0.036	0.062	1	4
Usp18	0.00198851	-0.996531	0.083	0.167	1	4
Parp12	0.0978065	-0.996298	0.025	0.051	1	4
Micall1	0.0200713	-0.996011	0.058	0.11	1	4
Prps2	0.0566306	-0.995806	0.043	0.079	1	4
Agmo	0.573014	-0.995372	0.029	0.037	1	4
Abhd13	0.447557	-0.994932	0.029	0.04	1	4
Dpm2	0.0206889	-0.994257	0.087	0.144	1	4
Tex49	0.526656	-0.994255	0.011	0.017	1	4
Saal1	0.318893	-0.993783	0.047	0.065	1	4
Txndc15	0.258633	-0.993525	0.09	0.116	1	4
B230217C12Rik	0.605625	-0.993157	0.014	0.02	1	4
Cdhr1	0.518797	-0.991976	0.061	0.073	1	4
Kyat3	0.525258	-0.990878	0.011	0.017	1	4
Vegfb	0.702367	-0.990668	0.04	0.045	1	4
Arpc1a	0.0125492	-0.99049	0.148	0.226	1	4
Nit1	0.129078	-0.988505	0.061	0.093	1	4
Dapk3	0.351322	-0.988457	0.116	0.138	1	4
Ccdc61	0.163535	-0.987787	0.047	0.073	1	4
Npepps	0.00339854	-0.986575	0.173	0.268	1	4
Cdh6	0.17887	-0.986572	0.004	0.014	1	4
Josd2	0.0678408	-0.98164	0.054	0.093	1	4
Coq8b	0.850503	-0.981213	0.043	0.04	1	4
Sepsecs	0.0279492	-0.981089	0.152	0.215	1	4
Flot2	0.207715	-0.981053	0.047	0.071	1	4
Ercc1	0.815208	-0.980761	0.047	0.042	1	4
Soat1	0.106	-0.980493	0.123	0.167	1	4
Trmt1	0.517417	-0.980348	0.087	0.099	1	4
Aasdhppt	0.227271	-0.979644	0.087	0.113	1	4
Dscc1	0.678866	-0.979612	0.018	0.023	1	4
Hmbs	0.245059	-0.978583	0.025	0.042	1	4
Rab11fip4	0.122772	-0.97815	0.051	0.082	1	4
Itsn1	0.0490553	-0.978066	0.054	0.096	1	4
Tmem18	0.679785	-0.977625	0.036	0.042	1	4
Tapbp	0.000349392	-0.977494	0.231	0.356	1	4
Wdr47	0.829302	-0.976789	0.061	0.056	1	4
Etaa1	0.31454	-0.976486	0.054	0.073	1	4
Eif2ak2	0.0474576	-0.976283	0.061	0.105	1	4
Ap4e1	0.189452	-0.974888	0.069	0.096	1	4
Skint3	0.28195	-0.974746	0.004	0.011	1	4
Fam162a	0.189861	-0.974494	0.13	0.161	1	4
Nvl	0.0198421	-0.974483	0.108	0.172	1	4
Ptcd3	0.226074	-0.972927	0.065	0.09	1	4
Rpa3	0.482637	-0.971919	0.076	0.09	1	4
Tnfaip1	0.123915	-0.971713	0.029	0.054	1	4
Pcbp4	0.0896564	-0.971054	0.032	0.062	1	4
Erlin2	0.163479	-0.971033	0.061	0.09	1	4
Hdgfl3	0.245428	-0.967246	0.054	0.076	1	4
Ttc39a	0.129717	-0.966658	0.083	0.119	1	4
Enc1	0.519659	-0.965924	0.043	0.054	1	4
Dpy19l1	0.106531	-0.965576	0.112	0.153	1	4
Rexo5	0.0394932	-0.964763	0.025	0.059	1	4
Adgre1	0.0737761	-0.964758	0.04	0.073	1	4
1700017B05Rik	0.170945	-0.964398	0.029	0.051	1	4
Eif4e	0.0164093	-0.963874	0.134	0.201	1	4
Lpar1	0.94875	-0.963674	0.011	0.011	1	4
Eif6	0.169736	-0.963601	0.162	0.198	1	4
Parn	0.0729646	-0.962769	0.101	0.147	1	4
Fahd2a	0.993992	-0.962236	0.043	0.042	1	4
Dck	0.614611	-0.961731	0.032	0.04	1	4
Strn	0.0304932	-0.961385	0.09	0.144	1	4
Mettl5	0.660499	-0.960336	0.047	0.054	1	4
Mok	0.452541	-0.960321	0.029	0.04	1	4
Mfsd10	0.439342	-0.960264	0.069	0.085	1	4
Ndnf	0.0314976	-0.957462	0.162	0.226	1	4
Naaladl2	0.16242	-0.957367	0.018	0.037	1	4
Ints2	0.0650842	-0.956994	0.043	0.079	1	4
Nek6	0.0326878	-0.955644	0.087	0.141	1	4
Jaml	0.398385	-0.955251	0.087	0.105	1	4
Rem1	0.0336221	-0.955141	0.069	0.119	1	4
Khnyn	0.00123501	-0.954623	0.108	0.203	1	4
Galnt7	0.021178	-0.953915	0.202	0.271	1	4
Psma1	0.0134726	-0.953776	0.209	0.285	1	4
Ppp1r8	0.0683668	-0.953594	0.04	0.073	1	4
Pdha1	0.0818434	-0.952912	0.105	0.15	1	4
Alg11	0.36566	-0.952276	0.036	0.051	1	4
Tspan14	0.149766	-0.950992	0.112	0.15	1	4
Hspbp1	0.0560191	-0.950651	0.04	0.076	1	4
Plod1	0.0144998	-0.950289	0.018	0.056	1	4
Serpinb9b	0.373485	-0.948854	0.011	0.02	1	4
Pot1a	0.0700157	-0.948421	0.058	0.096	1	4
Otud5	0.104593	-0.947837	0.195	0.237	1	4
Maf1	0.00232325	-0.947266	0.087	0.167	1	4
Tor1b	0.10179	-0.946437	0.076	0.113	1	4
Hspb1	0.00615431	-0.946323	0.047	0.107	1	4
Gde1	0.0783845	-0.945993	0.058	0.096	1	4
Rgs18	0.166107	-0.945505	0.054	0.082	1	4
Cdc26	0.0140331	-0.944855	0.144	0.218	1	4
Rfxank	0.397623	-0.943615	0.047	0.062	1	4
Ugt1a7c	0.0851163	-0.942782	0.007	0.025	1	4
Exoc5	0.00950006	-0.942331	0.188	0.274	1	4
Cd96	0.0360541	-0.941556	0.112	0.169	1	4
Capn1	0.0624202	-0.94108	0.101	0.15	1	4
Jakmip1	0.70737	-0.940484	0.069	0.076	1	4
Plekho1	0.00456518	-0.940037	0.166	0.254	1	4
Tinf2	0.248449	-0.939823	0.072	0.096	1	4
2700062C07Rik	0.0710382	-0.939566	0.058	0.096	1	4
Cab39l	0.00199265	-0.93942	0.155	0.251	1	4
Gins4	0.366604	-0.93924	0.065	0.082	1	4
Il18r1	0.0417852	-0.939231	0.202	0.26	1	4
Prpf4	0.130352	-0.938578	0.076	0.11	1	4
Samd3	0.568204	-0.937317	0.029	0.037	1	4
Lss	0.455208	-0.937055	0.014	0.023	1	4
Igfbp4	0.391463	-0.93703	0.047	0.062	1	4
Agpat5	0.161482	-0.937005	0.061	0.09	1	4
Dynlt2b	0.331735	-0.936943	0.123	0.147	1	4
Rnf213	0.000155162	-0.936394	0.155	0.285	1	4
Sf3a2	0.668613	-0.936085	0.058	0.065	1	4
Gpr18	0.156024	-0.934862	0.072	0.105	1	4
Pde6d	0.770428	-0.934551	0.134	0.138	1	4
Morc2a	0.399758	-0.93414	0.083	0.102	1	4
Zfp286	0.795357	-0.934134	0.014	0.017	1	4
Gtf2h3	0.201998	-0.933905	0.047	0.071	1	4
Zfp180	0.172317	-0.933807	0.076	0.107	1	4
Pfas	0.8596	-0.933652	0.029	0.031	1	4
Pign	0.0208549	-0.932166	0.13	0.195	1	4
Rhot1	0.0353521	-0.931812	0.17	0.232	1	4
Sc5d	0.293859	-0.931218	0.069	0.09	1	4
Fgf14	0.53656	-0.930398	0.043	0.054	1	4
Zfp444	0.0522039	-0.930297	0.043	0.082	1	4
Mcts1	0.0172701	-0.929971	0.134	0.201	1	4
Apobec1	9.4085e-05	-0.929916	0.155	0.288	1	4
Gm49336	0.56191	-0.929768	0.047	0.056	1	4
Gal3st2c	0.606981	-0.929566	0.014	0.02	1	4
Map2k5	0.00707994	-0.929435	0.195	0.282	1	4
Slc35b3	0.316176	-0.928713	0.094	0.116	1	4
Bid	0.420946	-0.928484	0.061	0.076	1	4
Cttnbp2nl	0.0149049	-0.928361	0.061	0.119	1	4
Tmem150c	0.00010986	-0.927754	0.199	0.333	1	4
Tubd1	0.405817	-0.927516	0.018	0.028	1	4
Dut	0.125963	-0.927234	0.079	0.116	1	4
Il15ra	0.00916232	-0.9272	0.141	0.218	1	4
Trmt2a	0.411977	-0.927161	0.101	0.119	1	4
Mthfd2	0.017683	-0.927104	0.134	0.201	1	4
Mpped2	0.0943809	-0.927003	0.058	0.093	1	4
Becn1	0.00562606	-0.926266	0.166	0.251	1	4
Lratd2	0.332377	-0.926043	0.025	0.04	1	4
Mrps33	0.0328264	-0.925206	0.195	0.26	1	4
Cdkl4	0.125355	-0.925008	0.014	0.034	1	4
Gk5	0.315704	-0.924769	0.025	0.04	1	4
Plp2	0.00776665	-0.924754	0.047	0.105	1	4
Mon1a	0.114341	-0.924213	0.043	0.073	1	4
Commd9	0.379782	-0.924077	0.061	0.079	1	4
Rbpj	0.00338877	-0.923275	0.318	0.41	1	4
Lair1	0.753233	-0.922786	0.036	0.031	1	4
Zfp770	0.192614	-0.922768	0.058	0.085	1	4
Atl1	0.831628	-0.922591	0.025	0.023	1	4
Icam2	0.68925	-0.922023	0.047	0.054	1	4
Sirt4	0.17887	-0.921911	0.004	0.014	1	4
Tapbpl	0.151973	-0.920519	0.123	0.161	1	4
Chaf1b	0.696869	-0.920424	0.018	0.014	1	4
Sdhc	0.519562	-0.920336	0.072	0.085	1	4
Macir	0.0503895	-0.919955	0.094	0.144	1	4
Amn1	0.00615984	-0.919858	0.101	0.178	1	4
Igdcc4	0.460888	-0.919394	0.022	0.031	1	4
Khdrbs2	0.59107	-0.919392	0.022	0.028	1	4
Rnasel	0.108426	-0.918146	0.069	0.105	1	4
Atosb	0.188395	-0.918039	0.025	0.045	1	4
Slfn5	0.526285	-0.917501	0.072	0.085	1	4
Nepro	0.400189	-0.91672	0.018	0.028	1	4
Fbxo36	0.412441	-0.916477	0.018	0.028	1	4
Spout1	0.954314	-0.916443	0.051	0.051	1	4
Blvra	0.0567085	-0.916116	0.04	0.076	1	4
3110009E18Rik	0.079699	-0.916106	0.022	0.048	1	4
Tspo	0.0132069	-0.915916	0.274	0.359	1	4
Emid1	0.526191	-0.915228	0.018	0.025	1	4
Pgd	0.178116	-0.914355	0.079	0.11	1	4
Appl2	0.0751774	-0.913608	0.083	0.127	1	4
Crkl	0.0588927	-0.913461	0.09	0.138	1	4
Obi1	0.019432	-0.913063	0.029	0.071	1	4
Dipk1a	0.0343839	-0.913036	0.155	0.22	1	4
Arhgap1	0.00814696	-0.912844	0.101	0.169	1	4
Parp6	0.0181134	-0.912753	0.051	0.102	1	4
Cpped1	0.0126931	-0.912532	0.051	0.105	1	4
Ccnh	0.148322	-0.912264	0.065	0.096	1	4
Cxadr	0.795357	-0.912126	0.014	0.017	1	4
Septin9	0.0044451	-0.911945	0.123	0.206	1	4
Efna2	0.639595	-0.911861	0.032	0.04	1	4
Sppl2a	0.000143764	-0.911619	0.181	0.316	1	4
Slc18a2	0.514142	-0.911381	0.011	0.017	1	4
Zfp39	0.653155	-0.911193	0.025	0.031	1	4
L3mbtl4	0.0135653	-0.911114	0.123	0.192	1	4
Dnajc27	0.267781	-0.911018	0.04	0.059	1	4
Cstf2	0.906424	-0.910667	0.047	0.048	1	4
Slc46a3	0.00209857	-0.910103	0.159	0.257	1	4
Sec24d	0.888273	-0.910037	0.058	0.059	1	4
Lrba	0.00056395	-0.909065	0.253	0.367	1	4
Msc	0.599674	-0.908889	0.007	0.011	1	4
Shfl	0.0800339	-0.908782	0.036	0.068	1	4
Ptpn12	0.170827	-0.908748	0.112	0.144	1	4
9030624G23Rik	0.764377	-0.908743	0.011	0.008	1	4
Fan1	0.931166	-0.90869	0.018	0.017	1	4
Dgkg	0.371304	-0.908081	0.011	0.02	1	4
Coq7	0.854933	-0.90745	0.029	0.031	1	4
Cyth3	0.145451	-0.907095	0.087	0.121	1	4
Stx7	0.0563066	-0.907004	0.184	0.24	1	4
Zfp715	0.912894	-0.90612	0.036	0.034	1	4
Mfsd13a	0.750103	-0.906086	0.022	0.025	1	4
Gsk3a	0.95074	-0.905811	0.116	0.113	1	4
Abhd5	0.0394932	-0.905738	0.025	0.059	1	4
Thtpa	0.92808	-0.905331	0.018	0.017	1	4
Gbp3	0.358702	-0.904301	0.022	0.034	1	4
Gimap9	0.118197	-0.903629	0.065	0.099	1	4
Mylk	0.0878965	-0.903606	0.011	0.031	1	4
Lyl1	0.263125	-0.902805	0.011	0.023	1	4
Nr3c2	0.0556441	-0.902159	0.076	0.121	1	4
Pyroxd1	0.0233783	-0.901699	0.072	0.127	1	4
Rc3h2	0.00805449	-0.901635	0.152	0.232	1	4
Dok1	0.0172756	-0.901593	0.087	0.15	1	4
Actn1	0.0155101	-0.901588	0.209	0.285	1	4
Syce2	0.361103	-0.901299	0.036	0.051	1	4
Creg1	0.0374952	-0.901126	0.155	0.215	1	4
Prr3	0.175251	-0.899815	0.072	0.102	1	4
Nkrf	0.628413	-0.897951	0.029	0.023	1	4
Ext2	0.0315216	-0.897725	0.105	0.161	1	4
Rtp4	0.0303562	-0.89637	0.004	0.025	1	4
Mx1	0.0123021	-0.896069	0.148	0.226	1	4
Fads1	0.863403	-0.895153	0.018	0.02	1	4
Frrs1	0.035464	-0.895135	0.036	0.076	1	4
Rnls	0.493978	-0.89433	0.069	0.082	1	4
Zfp874a	0.18204	-0.894273	0.011	0.025	1	4
Zfp738	0.109236	-0.893022	0.054	0.088	1	4
Tmem203	0.486689	-0.892987	0.047	0.059	1	4
1700030K09Rik	0.682799	-0.892744	0.018	0.023	1	4
Ttc36	0.281282	-0.892515	0.007	0.017	1	4
Timeless	0.0598058	-0.892506	0.014	0.04	1	4
Rfesd	0.315127	-0.891643	0.047	0.031	1	4
Syne3	0.146399	-0.891571	0.032	0.056	1	4
Gga2	0.0804391	-0.891398	0.047	0.082	1	4
Spa17	0.415083	-0.890529	0.007	0.014	1	4
Cmah	0.519706	-0.888731	0.083	0.096	1	4
Trim46	0.412311	-0.88809	0.007	0.014	1	4
Zfp672	0.348222	-0.88798	0.079	0.099	1	4
Dhx58	0.12735	-0.887274	0.007	0.023	1	4
Nap1l4	0.0166647	-0.886428	0.173	0.243	1	4
Ccl5	7.28319e-05	-0.885954	0.296	0.449	1	4
Dpysl5	0.125332	-0.884746	0.007	0.023	1	4
Sqle	0.0208699	-0.884453	0.022	0.059	1	4
Nos1ap	0.130985	-0.884244	0.047	0.076	1	4
Elmod2	0.0452592	-0.884243	0.047	0.088	1	4
Wdr77	0.200492	-0.883776	0.047	0.071	1	4
Zbtb5	0.172392	-0.883606	0.043	0.068	1	4
Mnat1	0.00113454	-0.883218	0.137	0.24	1	4
Kctd18	0.153204	-0.883062	0.072	0.105	1	4
Ltn1	0.188199	-0.88246	0.126	0.161	1	4
Tlcd3b	0.600029	-0.882456	0.022	0.028	1	4
Cacna1s	0.326731	-0.882445	0.032	0.048	1	4
Tbl1xr1	0.00454569	-0.881636	0.271	0.362	1	4
Gba2	0.281482	-0.881013	0.036	0.054	1	4
Tyk2	0.0115185	-0.880777	0.152	0.229	1	4
Rap2b	0.0195083	-0.880292	0.238	0.311	1	4
Oaf	0.875116	-0.879918	0.018	0.02	1	4
Pfkfb1	0.0591815	-0.879761	0.011	0.034	1	4
Gm14410	0.835533	-0.878949	0.025	0.023	1	4
Afg1l	0.169639	-0.878781	0.072	0.102	1	4
Gspt1	0.0115997	-0.877221	0.173	0.251	1	4
Kcmf1	0.000191192	-0.877204	0.227	0.353	1	4
Pdp1	0.321714	-0.877074	0.032	0.048	1	4
Cibar1	0.96224	-0.876666	0.072	0.071	1	4
Fzd8	0.766375	-0.876633	0.011	0.008	1	4
Prnp	0.0130116	-0.875963	0.097	0.164	1	4
Cenpn	0.263093	-0.875743	0.014	0.006	1	4
Tspan3	0.00160869	-0.87574	0.238	0.35	1	4
Zfp956	0.145455	-0.875631	0.022	0.042	1	4
Nup93	0.0733212	-0.875509	0.083	0.127	1	4
Man2b2	0.798251	-0.874877	0.036	0.04	1	4
Epb41l4b	0.657512	-0.874565	0.043	0.051	1	4
Pcgf1	0.967745	-0.874135	0.029	0.028	1	4
Khk	0.198823	-0.87395	0.04	0.062	1	4
Ctnnbip1	0.41059	-0.873793	0.04	0.054	1	4
Ift80	0.491461	-0.873454	0.101	0.116	1	4
Ncln	0.603253	-0.873415	0.061	0.051	1	4
Dusp9	0.599674	-0.873372	0.007	0.011	1	4
Bcl3	0.0166777	-0.873242	0.123	0.192	1	4
Lix1l	0.128254	-0.873192	0.011	0.028	1	4
Ifngr2	4.16595e-05	-0.872739	0.116	0.243	0.689464	4
Cwf19l1	0.222819	-0.872587	0.036	0.056	1	4
Ccdc146	0.686741	-0.872233	0.018	0.023	1	4
Aar2	0.975709	-0.871939	0.076	0.073	1	4
Rad50	0.000403549	-0.8701	0.227	0.353	1	4
Rnf169	0.00431436	-0.869775	0.206	0.294	1	4
Slc4a2	0.922518	-0.869316	0.047	0.048	1	4
Jagn1	0.969602	-0.86898	0.065	0.065	1	4
Lsm10	0.344354	-0.868368	0.069	0.088	1	4
Glce	0.320022	-0.868049	0.054	0.073	1	4
Trim27	0.172022	-0.867735	0.105	0.138	1	4
Zdhhc2	0.361698	-0.867482	0.029	0.042	1	4
Trim12a	0.0318173	-0.867369	0.148	0.212	1	4
Cdh4	0.28027	-0.867337	0.007	0.017	1	4
Vps54	0.00742657	-0.866663	0.166	0.249	1	4
Tmem8b	0.18204	-0.866373	0.011	0.025	1	4
Adal	0.614039	-0.865907	0.032	0.025	1	4
D5Ertd579e	0.119401	-0.865906	0.119	0.161	1	4
Ncbp2	0.204175	-0.86574	0.079	0.107	1	4
Phf1	0.943933	-0.865643	0.065	0.062	1	4
Hsdl2	0.934878	-0.865426	0.061	0.062	1	4
Got2	0.170932	-0.864916	0.123	0.161	1	4
Uhrf1bp1l	0.121825	-0.864332	0.17	0.212	1	4
Hinfp	0.371572	-0.864244	0.036	0.051	1	4
Fancm	0.605757	-0.864023	0.04	0.048	1	4
Cnr1	0.560538	-0.863712	0.036	0.045	1	4
Nmnat1	0.058909	-0.863428	0.022	0.051	1	4
Cdca2	0.950681	-0.863425	0.011	0.011	1	4
Zbed5	0.221938	-0.862903	0.018	0.034	1	4
M1ap	0.322628	-0.862895	0.047	0.065	1	4
Slc39a13	0.168636	-0.862879	0.043	0.068	1	4
Trim65	0.0887187	-0.862749	0.069	0.107	1	4
Dpf3	0.977479	-0.862623	0.029	0.028	1	4
Mrps17	0.307827	-0.862454	0.123	0.15	1	4
Tmx3	0.00535654	-0.862094	0.162	0.251	1	4
Unc50	0.0310105	-0.861201	0.076	0.127	1	4
Flt1	0.41093	-0.860712	0.007	0.014	1	4
Nup155	0.39076	-0.860001	0.087	0.105	1	4
Phf7	0.0293551	-0.858766	0.018	0.051	1	4
Zscan25	0.220753	-0.858165	0.018	0.034	1	4
Insl6	0.747862	-0.857548	0.036	0.031	1	4
Ptdss1	0.90499	-0.857528	0.094	0.093	1	4
Atr	0.0401531	-0.857062	0.123	0.178	1	4
Rnaset2a	0.963724	-0.856548	0.047	0.045	1	4
Lamtor1	0.0308758	-0.856423	0.13	0.192	1	4
Rwdd3	1	-0.856311	0.025	0.025	1	4
Tmx1	0.848313	-0.856249	0.097	0.099	1	4
Cdh24	0.278545	-0.856071	0.022	0.037	1	4
Tmem68	0.0908856	-0.855815	0.058	0.093	1	4
Alms1	0.0276951	-0.855306	0.047	0.093	1	4
Mul1	0.185678	-0.855285	0.025	0.045	1	4
Lgals1	0.00488476	-0.85497	0.173	0.268	1	4
Smim30	0.110068	-0.854896	0.079	0.116	1	4
Timm8a1	0.250611	-0.853431	0.061	0.085	1	4
Morn1	0.402493	-0.853052	0.04	0.054	1	4
Polr2d	0.599322	-0.852915	0.069	0.079	1	4
Epsti1	2.04561e-05	-0.852697	0.332	0.483	0.338549	4
Itih5	0.954545	-0.851737	0.011	0.011	1	4
Cct6b	0.283233	-0.85143	0.004	0.011	1	4
Mrpl54	0.0839884	-0.85018	0.191	0.249	1	4
Il15	4.73521e-05	-0.848949	0.105	0.234	0.783677	4
Pop5	0.0969872	-0.84876	0.141	0.189	1	4
Poli	0.233483	-0.848716	0.043	0.065	1	4
Spata6	0.0269661	-0.847973	0.148	0.215	1	4
Polr1b	0.117364	-0.847696	0.018	0.04	1	4
Csmd1	0.138084	-0.847315	0.155	0.195	1	4
Slc4a3	0.461843	-0.847272	0.022	0.031	1	4
Ackr3	0.179718	-0.846505	0.004	0.014	1	4
Scart1	0.151016	-0.846175	0.022	0.042	1	4
Erc1	0.173356	-0.845748	0.119	0.155	1	4
4933434E20Rik	0.550701	-0.845383	0.065	0.076	1	4
Nip7	0.196133	-0.844954	0.101	0.133	1	4
Msi2	3.32521e-05	-0.844773	0.372	0.514	0.550322	4
Tmod3	0.00370655	-0.843563	0.227	0.322	1	4
Gmfb	0.0237012	-0.843415	0.112	0.175	1	4
Fmnl3	0.185133	-0.843031	0.097	0.13	1	4
Clec12a	0.313663	-0.842759	0.065	0.085	1	4
Wdr43	0.0101751	-0.842759	0.177	0.26	1	4
Kif15	0.800068	-0.84271	0.014	0.017	1	4
Rab9	0.151917	-0.842226	0.148	0.186	1	4
Trafd1	0.00421247	-0.841979	0.191	0.285	1	4
9130008F23Rik	0.351983	-0.841596	0.043	0.059	1	4
Immp1l	0.0277183	-0.840444	0.134	0.195	1	4
Ambra1	2.53851e-05	-0.840148	0.314	0.463	0.420124	4
Ttc1	0.0796247	-0.839811	0.097	0.144	1	4
Gimap7	0.467468	-0.839635	0.036	0.048	1	4
Maskbp3	0.0733832	-0.839248	0.004	0.02	1	4
Ric8b	0.0463331	-0.839197	0.076	0.124	1	4
Sra1	0.059826	-0.839072	0.123	0.172	1	4
Fblim1	0.182989	-0.838584	0.025	0.045	1	4
Arap3	0.843286	-0.838304	0.029	0.031	1	4
1110059E24Rik	0.279407	-0.837959	0.076	0.099	1	4
Frg1	0.0885827	-0.83788	0.177	0.223	1	4
Srp72	0.112869	-0.837727	0.184	0.229	1	4
Ift52	0.0993125	-0.83756	0.101	0.141	1	4
Bmp7	0.41093	-0.837261	0.007	0.014	1	4
Mosmo	0.028919	-0.83638	0.105	0.164	1	4
Zfp809	0.0517716	-0.836112	0.141	0.195	1	4
Mybl1	0.289473	-0.835989	0.018	0.008	1	4
Bcas2	0.0138099	-0.835449	0.148	0.223	1	4
Lyz2	0.00741826	-0.833767	0.051	0.11	1	4
Nudcd2	0.325302	-0.833432	0.087	0.107	1	4
Entpd6	0.0167223	-0.832979	0.043	0.093	1	4
Pou5f1	0.127763	-0.832694	0.014	0.034	1	4
Faf2	0.0415951	-0.832092	0.134	0.192	1	4
Fancf	0.601495	-0.831945	0.007	0.011	1	4
Cst3	0.000272703	-0.831885	0.282	0.418	1	4
Cops6	0.0538536	-0.831318	0.09	0.141	1	4
Dscaml1	3.46539e-05	-0.830337	0.227	0.379	0.573522	4
Creb3	0.410278	-0.83019	0.058	0.073	1	4
Dstyk	0.0165922	-0.829861	0.108	0.175	1	4
Tnk2	0.141633	-0.829016	0.043	0.071	1	4
Mri1	0.130895	-0.828785	0.069	0.102	1	4
Mfsd4b4	0.187618	-0.828779	0.007	0.02	1	4
Hycc2	0.119628	-0.82876	0.051	0.082	1	4
Cmpk2	0.457457	-0.828489	0.014	0.023	1	4
Tmem115	0.366748	-0.828407	0.022	0.034	1	4
Hpse	0.567657	-0.828257	0.054	0.065	1	4
Ifi214	0.853766	-0.827363	0.029	0.031	1	4
Casp9	0.182544	-0.827344	0.025	0.045	1	4
Inip	0.165729	-0.826287	0.079	0.11	1	4
Art3	0.371304	-0.825458	0.011	0.02	1	4
Arhgap42	0.0200923	-0.825433	0.032	0.076	1	4
Fbxo22	0.110823	-0.825277	0.079	0.116	1	4
Tmem126b	0.20481	-0.824971	0.022	0.04	1	4
Zfp791	0.460888	-0.824931	0.022	0.031	1	4
Rnf128	0.729132	-0.824719	0.014	0.011	1	4
Armc5	0.116431	-0.823987	0.032	0.059	1	4
Rabgap1	0.000697184	-0.823669	0.224	0.345	1	4
Mrpl40	0.0522274	-0.823567	0.072	0.119	1	4
Esr1	0.177534	-0.823558	0.072	0.102	1	4
Uqcc5	0.211822	-0.823541	0.126	0.158	1	4
Stk35	0.547413	-0.822715	0.065	0.076	1	4
Zdhhc4	0.102473	-0.822673	0.047	0.079	1	4
Ecd	0.749189	-0.822213	0.09	0.082	1	4
Agtpbp1	0.0395516	-0.821902	0.101	0.155	1	4
Nup37	0.266452	-0.821305	0.011	0.023	1	4
Zfp748	0.431374	-0.82106	0.036	0.048	1	4
Ifitm10	0.543214	-0.820521	0.018	0.025	1	4
Pex16	0.0229559	-0.820107	0.097	0.158	1	4
Rbm12	0.965966	-0.82005	0.043	0.042	1	4
Stx16	0.00319683	-0.819493	0.22	0.314	1	4
Gzma	0.811026	-0.819372	0.047	0.051	1	4
Hilpda	0.990829	-0.81937	0.058	0.056	1	4
Tulp3	0.281282	-0.819195	0.007	0.017	1	4
Mboat7	0.839455	-0.819124	0.097	0.102	1	4
Rnf20	0.0633303	-0.81835	0.134	0.186	1	4
Tcte1	0.365007	-0.818273	0.036	0.051	1	4
Sdc3	0.243377	-0.817893	0.025	0.042	1	4
Wdr90	0.801021	-0.817813	0.047	0.051	1	4
Slc9a8	0.0608895	-0.817533	0.083	0.13	1	4
Sh3rf1	0.152699	-0.817314	0.079	0.113	1	4
Hbegf	0.248923	-0.817199	0.014	0.028	1	4
Grpel2	0.548552	-0.815036	0.047	0.037	1	4
Rab22a	0.0610533	-0.814299	0.155	0.206	1	4
Rfc3	0.919514	-0.814164	0.051	0.048	1	4
Ctdsp1	0.327017	-0.812322	0.058	0.076	1	4
Sema4f	0.763416	-0.81231	0.032	0.028	1	4
Abhd14b	0.240529	-0.811953	0.014	0.028	1	4
Irak3	0.165812	-0.811872	0.029	0.051	1	4
Lrrc42	0.355659	-0.811831	0.061	0.079	1	4
Brf2	0.887945	-0.81175	0.032	0.034	1	4
Cep20	0.19341	-0.811565	0.083	0.113	1	4
Mboat1	0.357106	-0.81134	0.022	0.034	1	4
Zfp599	0.412311	-0.811224	0.007	0.014	1	4
Rap1gap	0.243305	-0.811119	0.014	0.028	1	4
Tspan5	0.0101482	-0.81096	0.083	0.15	1	4
Samd9l	0.0143683	-0.810334	0.101	0.169	1	4
Eola1	0.220113	-0.810015	0.036	0.056	1	4
Spsb1	0.00388206	-0.809874	0.126	0.212	1	4
Trerf1	0.00922153	-0.809819	0.289	0.373	1	4
Tafa5	0.127858	-0.809107	0.007	0.023	1	4
Ftl1-ps1	0.94163	-0.808869	0.032	0.031	1	4
Scfd1	0.0193974	-0.80881	0.159	0.232	1	4
Fkbp5	0.042425	-0.80825	0.126	0.184	1	4
Nup133	0.0731123	-0.807849	0.025	0.054	1	4
Zfp35	0.604532	-0.807563	0.022	0.028	1	4
Apol10b	0.619773	-0.807492	0.058	0.048	1	4
Kcnh7	0.412252	-0.807174	0.025	0.037	1	4
Zc3h12b	0.939787	-0.80702	0.065	0.062	1	4
Osbpl3	0.125506	-0.807007	0.126	0.167	1	4
Sla	0.06303	-0.80639	0.108	0.158	1	4
Lsm12	0.275426	-0.806195	0.199	0.226	1	4
Lsm14a	0.0135688	-0.8061	0.177	0.257	1	4
Slain1	0.196388	-0.805678	0.054	0.079	1	4
Arhgef6	0.0255643	-0.804931	0.253	0.325	1	4
Dennd6a	0.00377716	-0.80442	0.148	0.237	1	4
Pramel12	0.380882	-0.804308	0.054	0.04	1	4
Sergef	0.226828	-0.804035	0.076	0.105	1	4
Vps9d1	0.172162	-0.803993	0.036	0.059	1	4
Zfp202	0.798497	-0.803954	0.014	0.017	1	4
Cysltr1	0.363516	-0.803863	0.022	0.034	1	4
Chchd5	0.288644	-0.803757	0.065	0.088	1	4
Vps37c	0.106353	-0.803603	0.061	0.096	1	4
Zmynd15	0.00319428	-0.803473	0.195	0.294	1	4
Nipa2	0.00301913	-0.803173	0.148	0.246	1	4
Dpp3	0.0395042	-0.801598	0.047	0.09	1	4
Ube2v1	0.18978	-0.801582	0.007	0.02	1	4
Amy1	0.519685	-0.80138	0.011	0.017	1	4
Tubgcp2	0.0592822	-0.80134	0.076	0.121	1	4
Socs6	0.15304	-0.801324	0.065	0.096	1	4
Net1	0.00141379	-0.801232	0.17	0.277	1	4
Fam20b	0.179616	-0.800964	0.058	0.085	1	4
Ranbp17	0.0225594	-0.800495	0.047	0.096	1	4
Wdfy2	0.0794185	-0.800429	0.09	0.133	1	4
Pcgf3	0.134862	-0.800252	0.061	0.093	1	4
Dcp1a	0.58017	-0.799652	0.09	0.102	1	4
Hsd17b7	0.967284	-0.799033	0.04	0.04	1	4
Cd1d1	0.374463	-0.798966	0.072	0.09	1	4
Uba1	0.200544	-0.798852	0.152	0.189	1	4
Acot13	0.973313	-0.798622	0.09	0.088	1	4
H2ac20	0.0534672	-0.797469	0.054	0.096	1	4
Lrrc20	0.78946	-0.796178	0.047	0.042	1	4
Rabggta	0.573979	-0.795981	0.029	0.037	1	4
Dnttip2	0.0157191	-0.795458	0.148	0.218	1	4
Sap30bp	0.794222	-0.79534	0.126	0.13	1	4
Serpini1	0.195454	-0.794724	0.076	0.105	1	4
Msh3	0.0694421	-0.794535	0.054	0.093	1	4
Ift27	0.789205	-0.794331	0.058	0.062	1	4
Psma5	0.0442236	-0.79407	0.213	0.28	1	4
Tmem37	0.512761	-0.793933	0.011	0.017	1	4
Cox19	0.724387	-0.793517	0.069	0.073	1	4
Hoxa7	0.813441	-0.793121	0.061	0.065	1	4
Ylpm1	3.49437e-05	-0.792789	0.209	0.356	0.578317	4
Ro60	0.196441	-0.791949	0.04	0.062	1	4
Cdan1	0.0835754	-0.791939	0.054	0.09	1	4
Mpst	0.858324	-0.791812	0.054	0.051	1	4
Bak1	0.0503595	-0.791268	0.043	0.082	1	4
Mthfsl	0.00062887	-0.790774	0.119	0.223	1	4
Zbtb48	0.111767	-0.790682	0.022	0.045	1	4
Large2	0.599674	-0.790351	0.007	0.011	1	4
Ndufs2	0.0223207	-0.79032	0.166	0.232	1	4
Mtpap	0.0226535	-0.789622	0.123	0.186	1	4
Ptger3	0.887647	-0.788634	0.022	0.02	1	4
Ccs	0.140338	-0.788324	0.061	0.093	1	4
Adamts14	0.597784	-0.788108	0.022	0.028	1	4
Ntn1	0.372394	-0.788081	0.011	0.02	1	4
Crat	0.786183	-0.787483	0.032	0.028	1	4
N4bp2l1	0.0575009	-0.787428	0.26	0.325	1	4
Setbp1	0.181876	-0.787353	0.137	0.175	1	4
Extl1	0.126823	-0.787322	0.097	0.136	1	4
Atp6v1b2	0.052397	-0.787079	0.181	0.24	1	4
Rab32	0.0193873	-0.786757	0.079	0.138	1	4
Irf2bp1	0.208559	-0.785866	0.04	0.062	1	4
Trip4	0.202245	-0.785685	0.083	0.113	1	4
Sp2	0.520559	-0.785487	0.097	0.11	1	4
Mcrip2	0.896902	-0.785381	0.032	0.034	1	4
Myof	0.0140863	-0.785178	0.025	0.068	1	4
Parp9	0.0128847	-0.784063	0.072	0.133	1	4
Cd320	0.747575	-0.783863	0.022	0.025	1	4
Ssr2	0.456098	-0.783665	0.144	0.161	1	4
Cenpt	0.464712	-0.783479	0.022	0.031	1	4
Mospd3	0.490218	-0.783383	0.047	0.059	1	4
Nup85	0.336038	-0.782464	0.094	0.116	1	4
Agap2	0.0829731	-0.782404	0.054	0.09	1	4
Casz1	0.148063	-0.782248	0.065	0.096	1	4
Rab3a	0.471129	-0.782109	0.011	0.006	1	4
Pigs	0.462746	-0.78169	0.054	0.068	1	4
1600012H06Rik	0.247315	-0.781324	0.025	0.042	1	4
Arl2bp	0.357839	-0.780711	0.105	0.127	1	4
Dhx30	0.0437965	-0.78055	0.166	0.226	1	4
Tk2	0.135353	-0.779874	0.061	0.093	1	4
Plekha1	0.00288953	-0.779842	0.177	0.271	1	4
Xpa	0.566429	-0.779257	0.134	0.147	1	4
Fam222b	0.115367	-0.779099	0.083	0.121	1	4
Tmem30a	0.0210481	-0.778636	0.17	0.24	1	4
Efna5	0.205383	-0.7786	0.13	0.164	1	4
Gm8773	0.518296	-0.778388	0.011	0.017	1	4
Fcer2a	0.302189	-0.778297	0.018	0.031	1	4
Pick1	0.182989	-0.777987	0.025	0.045	1	4
Adra1b	0.521075	-0.777708	0.011	0.017	1	4
Gnl3l	0.00869962	-0.777631	0.04	0.093	1	4
Abhd16a	0.223374	-0.777619	0.097	0.127	1	4
Hgf	0.335973	-0.777545	0.014	0.025	1	4
Map3k9	0.413696	-0.777333	0.007	0.014	1	4
Atxn1	0.00899028	-0.777165	0.307	0.395	1	4
Ccdc58	0.206988	-0.776986	0.069	0.096	1	4
Cisd2	0.0118206	-0.776275	0.155	0.232	1	4
Tmem156	0.157957	-0.776169	0.04	0.065	1	4
Abcb4	0.735968	-0.776149	0.014	0.011	1	4
Ydjc	0.413079	-0.775386	0.025	0.037	1	4
Ccdc85a	0.814701	-0.775088	0.036	0.04	1	4
Pank3	0.806795	-0.774182	0.072	0.076	1	4
Sypl	0.152953	-0.773623	0.112	0.15	1	4
Cxcr4	0.0723064	-0.772912	0.116	0.164	1	4
Esam	0.0732545	-0.772381	0.04	0.073	1	4
Ipo11	0.086723	-0.772171	0.101	0.144	1	4
Nol8	0.00431087	-0.771615	0.079	0.155	1	4
Eif1ax	0.0673237	-0.771511	0.152	0.201	1	4
Ehf	0.209244	-0.770934	0.054	0.079	1	4
Cspp1	0.00812279	-0.770243	0.162	0.246	1	4
Heatr9	0.387794	-0.76958	0.047	0.062	1	4
Rnf141	0.0631429	-0.769344	0.051	0.088	1	4
Abhd15	0.225924	-0.769137	0.029	0.048	1	4
Adgrg1	0.372394	-0.768967	0.011	0.02	1	4
Dhodh	0.293871	-0.768816	0.029	0.045	1	4
Fam219b	0.277104	-0.768581	0.029	0.045	1	4
AB124611	0.0923444	-0.768348	0.058	0.093	1	4
Wdr44	0.0517381	-0.767228	0.105	0.161	1	4
[truncated: 8,450 more rows]

## Sheet: WT ECTV vs Ifnar1 ECTV clu6-pDC
	p_val	avg_log2FC	pct.1	pct.2	p_val_adj	cluster		high in WT ECTV 1 dpi (-)	high in Ifnar1 ko ECTV 1 dpi (+)
Ifi27l2a	5.13147e-51	-7.28867	0.028	0.698	8.49258e-47	6
Il22	0.101404	-6.99617	0	0.011	1	6
Iigp1	1.24671e-05	-6.0456	0.004	0.085	0.20633	6
Ifi44	5.57323e-09	-6.03136	0	0.127	9.2237e-05	6
Gm21188	1.15795e-10	-5.88031	0	0.153	1.91642e-06	6
Ly6a	7.47207e-50	-5.65594	0.122	0.767	1.23663e-45	6
Isg15	1.23026e-07	-5.58044	0.004	0.116	0.00203608	6
Sct	0.000101356	-5.09392	0	0.058	1	6
Oasl1	5.65186e-07	-5.02042	0.004	0.106	0.00935382	6
Spon1	0.00202653	-4.81265	0	0.037	1	6
Spatc1	0.101404	-4.66992	0	0.011	1	6
Oasl2	1.21677e-07	-4.57798	0.008	0.127	0.00201375	6
Ifitm3	4.56935e-05	-4.38754	0.008	0.085	0.756228	6
Usp18	2.3197e-13	-4.36536	0.035	0.275	3.8391e-09	6
Ifit3	0.00927034	-4.35284	0	0.026	1	6
Mx2	8.92917e-11	-4.32923	0.016	0.196	1.47778e-06	6
Apod	0.00431905	-4.30525	0	0.032	1	6
Spata16	0.101404	-4.25808	0	0.011	1	6
Slfn5	3.68675e-05	-4.2388	0.031	0.132	0.610157	6
Gbp6	0.000213847	-4.08169	0	0.053	1	6
Or2w1b	0.101404	-4.07755	0	0.011	1	6
Xaf1	3.94057e-06	-4.07168	0.012	0.111	0.0652164	6
1810065E05Rik	0.00095523	-4.07142	0	0.042	1	6
Tnni3k	0.101404	-3.97019	0	0.011	1	6
Sdc3	9.56209e-05	-3.86877	0.008	0.079	1	6
Ifit1	0.0201182	-3.85839	0	0.021	1	6
Ifi204	0.00431905	-3.83438	0	0.032	1	6
Rsad2	0.0010517	-3.82772	0.004	0.053	1	6
Hck	4.39353e-08	-3.80587	0.024	0.169	0.000727129	6
Ifih1	9.55059e-06	-3.70582	0.02	0.122	0.158062	6
Gfra3	5.77589e-06	-3.645	0.031	0.148	0.0955909	6
Lix1l	0.0201332	-3.64358	0.004	0.032	1	6
Hey2	0.00431905	-3.63996	0	0.032	1	6
Camp	0.101404	-3.61651	0	0.011	1	6
Trim6	0.0053267	-3.59343	0.012	0.058	1	6
Phf11a	0.00202653	-3.55471	0	0.037	1	6
Adam32	0.101404	-3.5439	0	0.011	1	6
Gm12253	3.04093e-23	-3.52106	0.079	0.476	5.03273e-19	6
Naaladl2	0.0428029	-3.48552	0.004	0.026	1	6
Acod1	0.400994	-3.47722	0.004	0.011	1	6
Cntnap2	0.00966085	-3.44123	0.004	0.037	1	6
Gm14391	0.0887914	-3.44112	0.004	0.021	1	6
H2-Q6	2.31139e-40	-3.41613	0.157	0.741	3.82536e-36	6
Nbea	4.80763e-06	-3.39778	0.02	0.127	0.0795662	6
Lgals3bp	1.01553e-11	-3.37012	0.035	0.249	1.6807e-07	6
Ushbp1	0.0201182	-3.36061	0	0.021	1	6
Parp12	0.101404	-3.3111	0	0.011	1	6
Lrrc43	0.101404	-3.28118	0	0.011	1	6
Eif2ak2	2.792e-09	-3.25987	0.035	0.212	4.62076e-05	6
Nr1h3	0.400994	-3.25522	0.004	0.011	1	6
Zswim5	0.0201182	-3.24439	0	0.021	1	6
Abhd3	0.0444498	-3.2053	0	0.016	1	6
Cenpf	0.101404	-3.20269	0	0.011	1	6
Prlr	0.0201182	-3.19021	0	0.021	1	6
Ifi207	1.48313e-07	-3.15764	0.043	0.196	0.00245458	6
Rhox8	0.0444498	-3.14843	0	0.016	1	6
Magi1	0.187963	-3.13002	0.004	0.016	1	6
Uchl1	0.0201182	-3.11395	0	0.021	1	6
Irgm2	0.000652419	-3.10611	0.012	0.074	1	6
Cysltr1	0.703655	-3.09715	0.012	0.016	1	6
Oas3	0.00431905	-3.09454	0	0.032	1	6
Mx1	3.24827e-07	-3.0782	0.051	0.206	0.00537588	6
Kcnip3	9.08307e-05	-3.06781	0.02	0.106	1	6
Efcab8	0.0887914	-3.06337	0.004	0.021	1	6
Gm19684	4.47872e-07	-3.06246	0.024	0.153	0.00741229	6
Ifit2	0.00907612	-3.05029	0.02	0.069	1	6
M1ap	0.191053	-3.04822	0.004	0.016	1	6
Cdc42ep2	0.101404	-3.03862	0	0.011	1	6
Ifi27	2.14547e-11	-3.02741	0.055	0.275	3.55075e-07	6
Angptl1	0.00927034	-3.02703	0	0.026	1	6
A530064D06Rik	0.000310201	-3.00978	0.02	0.095	1	6
Nupr1l	0.00927034	-2.99143	0	0.026	1	6
Shisa7	0.101404	-2.99052	0	0.011	1	6
Tmem81	0.0444498	-2.98985	0	0.016	1	6
Fam47e	0.398038	-2.98385	0.004	0.011	1	6
Zfp612	0.0444498	-2.98115	0	0.016	1	6
Oas1b	0.00927034	-2.96627	0	0.026	1	6
Ccdc112	0.00455305	-2.93609	0.004	0.042	1	6
Sult6b1	0.00927034	-2.93141	0	0.026	1	6
Gal3st2c	0.0444498	-2.89644	0	0.016	1	6
Tuba8	0.0201182	-2.89414	0	0.021	1	6
Lrrc56	0.00179614	-2.89212	0.008	0.058	1	6
Plat	0.189503	-2.88921	0.004	0.016	1	6
Il23r	0.148934	-2.85967	0.016	0.037	1	6
D13Ertd608e	2.53274e-06	-2.85632	0.02	0.132	0.0419169	6
Gpr176	0.0201332	-2.85454	0.004	0.032	1	6
Gpat3	0.00123099	-2.85201	0.031	0.106	1	6
Stard10	0.00450946	-2.84992	0.004	0.042	1	6
Tfpi	0.228248	-2.83026	0.008	0.021	1	6
Nol3	0.227525	-2.82821	0.008	0.021	1	6
Cd300ld	0.0444498	-2.80949	0	0.016	1	6
Smim17	0.0201182	-2.79638	0	0.021	1	6
Oas1a	0.0201182	-2.79333	0	0.021	1	6
H2-Q7	1.93015e-54	-2.7753	0.492	0.963	3.19439e-50	6
Pheta1	0.0201182	-2.77018	0	0.021	1	6
Kdr	6.80531e-10	-2.75587	0.055	0.259	1.12628e-05	6
Zfp354c	0.117614	-2.75521	0.008	0.026	1	6
Kctd17	0.0201332	-2.75419	0.004	0.032	1	6
Snx8	0.0105843	-2.75379	0.012	0.053	1	6
S100a8	0.000235602	-2.74375	0.024	0.106	1	6
Brip1	0.398038	-2.73632	0.004	0.011	1	6
Phf11b	2.00688e-11	-2.73329	0.043	0.259	3.32139e-07	6
Dok4	0.0420401	-2.72994	0.004	0.026	1	6
Slc5a6	0.0201182	-2.7283	0	0.021	1	6
Mansc4	0.0444498	-2.72365	0	0.016	1	6
Acoxl	0.0151946	-2.70965	0.008	0.042	1	6
Ifi211	0.424329	-2.70956	0.012	0.021	1	6
Hs6st3	0.479228	-2.70406	0.012	0.005	1	6
Psma8	0.0444498	-2.68193	0	0.016	1	6
Zfp72	0.0444498	-2.6807	0	0.016	1	6
Cxcl13	0.425106	-2.68044	0.008	0.016	1	6
Dennd2c	0.0444498	-2.67923	0	0.016	1	6
Pamr1	0.0444498	-2.67911	0	0.016	1	6
Trpa1	0.101404	-2.67854	0	0.011	1	6
Vcam1	0.760715	-2.65817	0.008	0.011	1	6
Aoah	0.137258	-2.64208	0.012	0.032	1	6
Adgrb3	0.0444498	-2.64103	0	0.016	1	6
Pex11a	0.0201182	-2.63262	0	0.021	1	6
Csprs	0.0288554	-2.63131	0.02	0.058	1	6
F830016B08Rik	0.101404	-2.62152	0	0.011	1	6
Cish	0.0291972	-2.61798	0.02	0.058	1	6
Cxcl10	0.158092	-2.61772	0.02	0.042	1	6
B430306N03Rik	0.0159433	-2.6133	0.008	0.042	1	6
Rnf213	4.5812e-10	-2.60992	0.126	0.354	7.58189e-06	6
Klhl8	0.159481	-2.60376	0.028	0.053	1	6
Mfsd2b	0.0444498	-2.5949	0	0.016	1	6
Gbp2	0.0603005	-2.58929	0.008	0.032	1	6
Ak9	0.0444498	-2.5827	0	0.016	1	6
Crip2	0.0246499	-2.56753	0.016	0.053	1	6
Sertad4	0.0444498	-2.55738	0	0.016	1	6
Syngr1	0.101404	-2.54963	0	0.011	1	6
Zfp248	0.119252	-2.54389	0.008	0.026	1	6
Prr33	0.00762818	-2.54278	0.008	0.048	1	6
Fblim1	0.0201182	-2.52997	0	0.021	1	6
Cd40	0.0180874	-2.52948	0.028	0.074	1	6
Zmynd15	0.398038	-2.5251	0.004	0.011	1	6
Ankrd33b	0.0179223	-2.52456	0.024	0.069	1	6
Txnl4b	0.0312483	-2.51394	0.008	0.037	1	6
F2rl1	0.0444498	-2.51058	0	0.016	1	6
Septin3	0.228248	-2.50898	0.008	0.021	1	6
Calcb	0.398038	-2.50735	0.004	0.011	1	6
Plekhf1	0.0201182	-2.5048	0	0.021	1	6
Lrrc19	0.101404	-2.49837	0	0.011	1	6
Cd276	0.117614	-2.49483	0.008	0.026	1	6
Ffar4	0.00561852	-2.4871	0.012	0.058	1	6
Caskin2	0.0444498	-2.48065	0	0.016	1	6
Cxcr2	0.398038	-2.47823	0.004	0.011	1	6
Isg20	0.00289254	-2.46965	0.012	0.063	1	6
Slfn2	4.11316e-10	-2.46854	0.098	0.323	6.80728e-06	6
Rtp4	0.00769162	-2.465	0.008	0.048	1	6
H1f1	0.189503	-2.46452	0.004	0.016	1	6
Folr2	0.0444498	-2.45084	0	0.016	1	6
Plagl1	0.101404	-2.43922	0	0.011	1	6
1700066M21Rik	0.0150729	-2.43778	0.008	0.042	1	6
Tmem132c	0.0201182	-2.43695	0	0.021	1	6
Ppp1r3d	0.717612	-2.43577	0.012	0.016	1	6
Pclaf	0.101404	-2.42549	0	0.011	1	6
Akap6	0.0991979	-2.42121	0.031	0.063	1	6
Or5m9	0.0444498	-2.41988	0	0.016	1	6
Srp54b	0.0431887	-2.41808	0.004	0.026	1	6
Efnb2	0.243538	-2.41693	0.012	0.026	1	6
Fzd8	0.0444498	-2.4116	0	0.016	1	6
Lipt2	0.0598573	-2.40658	0.008	0.032	1	6
Clec4d	0.101404	-2.39537	0	0.011	1	6
Fbxl22	0.0201182	-2.39526	0	0.021	1	6
Procr	0.00243742	-2.39517	0.039	0.111	1	6
Hlf	0.0391448	-2.39264	0.012	0.042	1	6
Asb5	0.0607463	-2.38211	0.008	0.032	1	6
Xylb	0.101404	-2.37948	0	0.011	1	6
Mindy4	0.101404	-2.37934	0	0.011	1	6
Grik2	0.101404	-2.37728	0	0.011	1	6
Snx33	0.430397	-2.37252	0.012	0.021	1	6
Tmem121	0.0444498	-2.36955	0	0.016	1	6
Zfp970	0.243538	-2.36879	0.012	0.026	1	6
S100a9	0.0278023	-2.36774	0.055	0.111	1	6
Rbm8a2	0.0444498	-2.3656	0	0.016	1	6
Saxo2	0.0444498	-2.35959	0	0.016	1	6
Rab27b	0.0444498	-2.35838	0	0.016	1	6
Or10aa3	0.0444498	-2.35333	0	0.016	1	6
2810459M11Rik	0.0420401	-2.35234	0.004	0.026	1	6
Gnrh1	0.101404	-2.3514	0	0.011	1	6
Pla2g4e	0.189503	-2.35025	0.004	0.016	1	6
Nradd	0.0444498	-2.33685	0	0.016	1	6
Caprin2	0.159471	-2.32999	0.024	0.048	1	6
Trim30d	2.55064e-13	-2.32894	0.189	0.466	4.22131e-09	6
Cfap54	0.187963	-2.32877	0.004	0.016	1	6
Cxcl2	0.251808	-2.32508	0.02	0.037	1	6
Pde7b	0.0944165	-2.32469	0.028	0.058	1	6
Trim30a	1.61751e-31	-2.31736	0.492	0.847	2.67698e-27	6
Hspa12a	0.760715	-2.31607	0.008	0.011	1	6
Shc4	0.135641	-2.31599	0.012	0.032	1	6
Armc2	0.0444498	-2.31586	0	0.016	1	6
1700113H08Rik	0.915091	-2.31581	0.012	0.011	1	6
6820408C15Rik	0.0444498	-2.31101	0	0.016	1	6
Fam219b	0.233028	-2.31049	0.043	0.069	1	6
Grm7	0.0424201	-2.31016	0.004	0.026	1	6
Cdca5	0.398038	-2.30898	0.004	0.011	1	6
Or52n4	0.101404	-2.30404	0	0.011	1	6
Mapre3	0.0523782	-2.30234	0.024	0.058	1	6
Cnr2	0.0133288	-2.29881	0.016	0.058	1	6
Map9	0.229699	-2.29878	0.008	0.021	1	6
Cmpk2	0.0039734	-2.29867	0.008	0.053	1	6
Cyp4f17	0.0203202	-2.29224	0.004	0.032	1	6
Cxcl1	0.101404	-2.27891	0	0.011	1	6
Dkkl1	0.0731356	-2.2729	0.012	0.037	1	6
Kalrn	0.0887914	-2.27003	0.004	0.021	1	6
Sirpd	0.101404	-2.26864	0	0.011	1	6
Dnmt3l	0.101404	-2.26115	0	0.011	1	6
P2rx3	0.101404	-2.26055	0	0.011	1	6
Mgam	0.0444498	-2.26023	0	0.016	1	6
Adgra2	0.0444498	-2.25795	0	0.016	1	6
Ube2c	0.187963	-2.25592	0.004	0.016	1	6
Cadm2	0.479228	-2.255	0.012	0.005	1	6
P3h2	0.0428029	-2.25432	0.004	0.026	1	6
Ifi205	0.0424201	-2.25402	0.004	0.026	1	6
Birc5	0.760715	-2.25325	0.008	0.011	1	6
Ube2l6	0.00145365	-2.25025	0.055	0.138	1	6
Gm3667	0.0444498	-2.24481	0	0.016	1	6
Retn	0.0444498	-2.24228	0	0.016	1	6
Retnlg	0.120078	-2.23969	0.008	0.026	1	6
Pla2g4d	0.0201182	-2.23926	0	0.021	1	6
Ifi213	0.0361531	-2.23255	0.039	0.085	1	6
Rnf144b	0.101404	-2.23092	0	0.011	1	6
Spag1	0.243538	-2.23006	0.012	0.026	1	6
Gabbr2	0.0887914	-2.22967	0.004	0.021	1	6
Ttc39c	0.0444498	-2.22371	0	0.016	1	6
Fam184b	0.425106	-2.21994	0.008	0.016	1	6
Trim30c	0.145054	-2.21843	0.016	0.037	1	6
Zfp583	0.152095	-2.21419	0.016	0.037	1	6
Dlc1	0.187963	-2.2068	0.004	0.016	1	6
Pla1a	0.0895631	-2.20455	0.004	0.021	1	6
Med18	0.15213	-2.20303	0.02	0.042	1	6
Gpr157	0.0219631	-2.20185	0.051	0.106	1	6
Tlr5	0.031978	-2.2018	0.008	0.037	1	6
Clec7a	0.0887914	-2.1993	0.004	0.021	1	6
Slc18a1	0.187963	-2.19855	0.004	0.016	1	6
Mzb1	0.0611949	-2.19628	0.008	0.032	1	6
Fam89a	0.153604	-2.19221	0.02	0.042	1	6
Bco2	0.187963	-2.19156	0.004	0.016	1	6
Clec4a2	0.101404	-2.18153	0	0.011	1	6
Tesc	0.0598573	-2.17377	0.008	0.032	1	6
Necab3	0.101404	-2.17361	0	0.011	1	6
Efnb1	0.138889	-2.17174	0.012	0.032	1	6
Ly6c2	2.57617e-29	-2.16488	0.602	0.894	4.26356e-25	6
Efhc1	0.00788478	-2.15989	0.008	0.048	1	6
Cdca3	0.42749	-2.15922	0.008	0.016	1	6
Wdr35	0.254217	-2.15849	0.012	0.026	1	6
Zfta	0.249606	-2.15637	0.02	0.037	1	6
Gm37419	0.101404	-2.14585	0	0.011	1	6
Pou2af2	0.425106	-2.14454	0.008	0.016	1	6
Gp6	0.101404	-2.14419	0	0.011	1	6
Slc23a1	0.101404	-2.14264	0	0.011	1	6
Gm15433	0.101404	-2.14	0	0.011	1	6
Pecr	0.151984	-2.13864	0.035	0.063	1	6
Esrp1	0.0256156	-2.13767	0.016	0.053	1	6
Dpep2	0.101404	-2.13703	0	0.011	1	6
Gm10778	0.423802	-2.13632	0.016	0.026	1	6
Nhlrc1	0.101404	-2.13608	0	0.011	1	6
Tmod2	0.101404	-2.13547	0	0.011	1	6
Sbk2	0.101404	-2.13534	0	0.011	1	6
Capn9	0.101404	-2.12952	0	0.011	1	6
Nupr1	0.0201182	-2.12892	0	0.021	1	6
Cabyr	0.0249683	-2.12849	0.016	0.053	1	6
Patl2	0.00447189	-2.12782	0.02	0.074	1	6
Creg2	0.101404	-2.1261	0	0.011	1	6
H2-Eb2	0.000331714	-2.12265	0.028	0.111	1	6
H2-Q5	1.28335e-06	-2.11724	0.051	0.196	0.0212394	6
Ret	0.400994	-2.11487	0.004	0.011	1	6
Ddx60	0.0206338	-2.10223	0.012	0.048	1	6
Rgs20	0.101404	-2.09637	0	0.011	1	6
Cdca8	0.424329	-2.09565	0.012	0.021	1	6
Garin3	0.187963	-2.09402	0.004	0.016	1	6
Prr22	0.101404	-2.09246	0	0.011	1	6
Dclk1	0.425106	-2.09188	0.008	0.016	1	6
Cdh22	2.70135e-08	-2.09037	0.189	0.402	0.000447073	6
H2bc24	0.0557534	-2.09008	0.024	0.058	1	6
Myl6b	0.0887914	-2.08775	0.004	0.021	1	6
Ppp1r9a	0.101404	-2.08711	0	0.011	1	6
Pde8b	0.398038	-2.08672	0.004	0.011	1	6
Zfp982	0.243538	-2.08599	0.012	0.026	1	6
Hsd11b1	9.65241e-10	-2.08547	0.224	0.455	1.59747e-05	6
Eps8l2	0.101404	-2.08532	0	0.011	1	6
Tmem253	0.400994	-2.08146	0.004	0.011	1	6
Cyp2d22	0.101404	-2.07948	0	0.011	1	6
Tpx2	0.189503	-2.07587	0.004	0.016	1	6
Meak7	0.0305329	-2.07394	0.008	0.037	1	6
Igtp	0.0333575	-2.07319	0.031	0.074	1	6
4933427D14Rik	0.0206987	-2.06808	0.004	0.032	1	6
Nusap1	0.244855	-2.06751	0.012	0.026	1	6
Synpo2	0.242505	-2.06599	0.028	0.048	1	6
Spic	0.101404	-2.06338	0	0.011	1	6
Dqx1	0.189503	-2.06118	0.004	0.016	1	6
Irgm1	0.000866665	-2.05694	0.075	0.169	1	6
Gm36864	0.101404	-2.05542	0	0.011	1	6
Ch25h	0.101404	-2.05499	0	0.011	1	6
H4c12	0.101404	-2.05336	0	0.011	1	6
Gm28557	0.101404	-2.04624	0	0.011	1	6
Echdc3	0.101404	-2.04036	0	0.011	1	6
Frg2f1	0.0620428	-2.04012	0.028	0.063	1	6
Kcnk12	0.119252	-2.03968	0.008	0.026	1	6
Doc2g	0.101404	-2.03731	0	0.011	1	6
Clec18a	0.101404	-2.03623	0	0.011	1	6
Lin28b	0.101404	-2.03579	0	0.011	1	6
Gm14137	0.101404	-2.0337	0	0.011	1	6
Dgki	0.0931272	-2.03367	0.028	0.058	1	6
Slfn9	0.24877	-2.03357	0.016	0.032	1	6
Ccdc39	0.101404	-2.03066	0	0.011	1	6
Tmem141	0.643479	-2.02711	0.016	0.011	1	6
Apobec1	8.21856e-06	-2.02594	0.169	0.328	0.136017	6
Bard1	0.0921688	-2.02272	0.024	0.053	1	6
Aplf	0.0402156	-2.02235	0.012	0.042	1	6
Aoc2	0.101404	-2.02222	0	0.011	1	6
Zfp653	0.0261107	-2.02171	0.016	0.053	1	6
Spata6l	0.892534	-2.02102	0.02	0.021	1	6
Gm14403	0.138889	-2.01859	0.012	0.032	1	6
9930111J21Rik1	0.0816894	-2.01764	0.016	0.042	1	6
Ptn	0.101404	-2.01686	0	0.011	1	6
Gm28635	0.101404	-2.01546	0	0.011	1	6
Dnah2	0.101404	-2.01476	0	0.011	1	6
Npy	0.0444498	-2.01193	0	0.016	1	6
Cdkn2b	0.0444498	-2.01112	0	0.016	1	6
Baalc	0.398038	-2.00824	0.004	0.011	1	6
Clu	0.63351	-2.00728	0.02	0.026	1	6
Ccl21a	0.400994	-2.00726	0.004	0.011	1	6
Micall2	0.0607463	-2.00464	0.008	0.032	1	6
Cip2a	0.0895631	-2.00407	0.004	0.021	1	6
Cacna1b	0.101404	-1.99763	0	0.011	1	6
Fer	0.101404	-1.99636	0	0.011	1	6
Lpar1	0.101404	-1.99297	0	0.011	1	6
Slc23a4	0.1513	-1.98907	0.016	0.037	1	6
Dhtkd1	0.101404	-1.98808	0	0.011	1	6
Rsph9	0.101404	-1.98767	0	0.011	1	6
Pebp4	0.425106	-1.98709	0.008	0.016	1	6
Enpp2	0.101404	-1.98626	0	0.011	1	6
Pfas	0.370199	-1.98578	0.051	0.069	1	6
Rab43	0.374319	-1.9852	0.028	0.042	1	6
Kat2a	0.0343487	-1.97293	0.028	0.069	1	6
Adgrg7	0.101404	-1.97167	0	0.011	1	6
Zfp59	0.117614	-1.97167	0.008	0.026	1	6
Krba1	0.0404872	-1.97006	0.012	0.042	1	6
Mrc2	0.101404	-1.96604	0	0.011	1	6
Batf3	0.010032	-1.96395	0.004	0.037	1	6
Car13	0.101404	-1.96275	0	0.011	1	6
Pdgfc	0.199524	-1.96205	0.047	0.074	1	6
Pdxp	0.03309	-1.96136	0.024	0.063	1	6
Nme3	0.0137823	-1.95641	0.016	0.058	1	6
Grifin	0.187963	-1.95631	0.004	0.016	1	6
Arhgap23	0.075502	-1.95625	0.012	0.037	1	6
Sfta2	0.229699	-1.95228	0.008	0.021	1	6
Cdhr1	0.187963	-1.94723	0.004	0.016	1	6
Slc25a22	0.0576708	-1.94388	0.031	0.069	1	6
Zfp455	0.118431	-1.94194	0.008	0.026	1	6
Tceal1	0.101404	-1.94126	0	0.011	1	6
Ston2	0.00111274	-1.94036	0.11	0.212	1	6
Nek2	0.189503	-1.9353	0.004	0.016	1	6
Ager	0.101404	-1.93309	0	0.011	1	6
Cxcl3	0.101404	-1.93288	0	0.011	1	6
Sqor	0.979216	-1.93041	0.016	0.016	1	6
4930469K13Rik	0.0362716	-1.92842	0.031	0.074	1	6
B3gat2	0.0444498	-1.92826	0	0.016	1	6
Arhgef33	0.119252	-1.92369	0.008	0.026	1	6
Cenpw	0.0350464	-1.91826	0.031	0.074	1	6
Adcy6	0.101404	-1.91631	0	0.011	1	6
Tox2	0.090598	-1.9094	0.02	0.048	1	6
Cfap97d1	0.187963	-1.90803	0.004	0.016	1	6
Ankrd13b	0.398038	-1.90551	0.004	0.011	1	6
Igf2bp3	0.543304	-1.90523	0.028	0.037	1	6
Hdc	0.648861	-1.90375	0.016	0.011	1	6
Gfod2	0.63285	-1.90055	0.047	0.037	1	6
Naip1	0.0895631	-1.89834	0.004	0.021	1	6
Ccdc57	0.436515	-1.88819	0.012	0.021	1	6
Crisp2	0.101404	-1.88708	0	0.011	1	6
Il12rb1	0.187963	-1.88162	0.004	0.016	1	6
Nxpe4	0.0389647	-1.87325	0.043	0.09	1	6
Stat1	7.63597e-14	-1.87276	0.287	0.593	1.26375e-09	6
Igfbp6	0.101404	-1.87131	0	0.011	1	6
Camk2a	0.0740748	-1.86818	0.012	0.037	1	6
Myo15a	0.226805	-1.86733	0.008	0.021	1	6
Rdh13	0.0119222	-1.86661	0.028	0.079	1	6
Traip	0.135641	-1.86358	0.012	0.032	1	6
Spdl1	0.187963	-1.85773	0.004	0.016	1	6
Tlr2	0.0471325	-1.85677	0.016	0.048	1	6
Tube1	0.189503	-1.85461	0.004	0.016	1	6
Eml2	0.00439534	-1.85319	0.079	0.159	1	6
Hs3st5	0.101404	-1.8521	0	0.011	1	6
Arhgap28	0.133841	-1.85209	0.043	0.074	1	6
Clba1	0.118431	-1.84589	0.008	0.026	1	6
2310022A10Rik	0.0076745	-1.84476	0.051	0.116	1	6
Ptges	0.101404	-1.84392	0	0.011	1	6
Cdh18	0.101404	-1.84066	0	0.011	1	6
Rarg	0.0167549	-1.83907	0.02	0.063	1	6
Adgrv1	0.226805	-1.83481	0.008	0.021	1	6
Vps37d	0.398038	-1.8314	0.004	0.011	1	6
Smtn	0.43243	-1.82997	0.012	0.021	1	6
Ncam2	0.101404	-1.82696	0	0.011	1	6
Gm21761	0.248837	-1.82481	0.012	0.026	1	6
Lrrc49	0.0903402	-1.82438	0.004	0.021	1	6
Gm20532	0.226805	-1.82128	0.008	0.021	1	6
Tert	0.226805	-1.81944	0.008	0.021	1	6
Ppp1r16a	0.143841	-1.81584	0.055	0.09	1	6
Slc16a3	0.398038	-1.81383	0.004	0.011	1	6
Phkg1	0.119252	-1.81381	0.008	0.026	1	6
Crb3	0.0887914	-1.81233	0.004	0.021	1	6
Trim69	0.139711	-1.81048	0.012	0.032	1	6
Nek10	0.0903402	-1.80556	0.004	0.021	1	6
Cfap73	0.101404	-1.80535	0	0.011	1	6
Fuom	0.101404	-1.80454	0	0.011	1	6
Dnmt3b	0.66839	-1.79985	0.035	0.042	1	6
Ndrg1	0.0959042	-1.79631	0.039	0.074	1	6
Iqcg	0.228248	-1.79096	0.008	0.021	1	6
Ugt1a7c	0.120908	-1.79035	0.008	0.026	1	6
Bace1	0.0504155	-1.7867	0.02	0.053	1	6
Nod1	0.0588668	-1.7847	0.035	0.074	1	6
Notch4	0.120078	-1.78467	0.008	0.026	1	6
Dscc1	0.101404	-1.78459	0	0.011	1	6
Dclre1a	0.0317332	-1.78454	0.008	0.037	1	6
Psme2b	0.193865	-1.7839	0.075	0.106	1	6
Neil3	0.101404	-1.78174	0	0.011	1	6
Cep126	0.398038	-1.78054	0.004	0.011	1	6
Kank3	0.119252	-1.77968	0.008	0.026	1	6
Capn3	0.308187	-1.77811	0.016	0.005	1	6
Zbtb32	0.101404	-1.77425	0	0.011	1	6
Klhl23	0.101404	-1.77401	0	0.011	1	6
Hpse2	0.253588	-1.77373	0.016	0.032	1	6
Rorc	0.0887914	-1.76836	0.004	0.021	1	6
Arhgef9	0.248511	-1.7659	0.02	0.037	1	6
Sync	0.398038	-1.7659	0.004	0.011	1	6
Hexim2	0.189503	-1.76517	0.004	0.016	1	6
Fkbp11	0.137258	-1.76482	0.012	0.032	1	6
Cd109	0.101404	-1.76191	0	0.011	1	6
Nuak1	0.138889	-1.76111	0.012	0.032	1	6
Gm43302	0.139711	-1.76021	0.012	0.032	1	6
Ppp1r3b	0.229699	-1.75894	0.008	0.021	1	6
Spats2l	0.101404	-1.75735	0	0.011	1	6
Ifi203	1.2922e-11	-1.75528	0.343	0.603	2.13858e-07	6
Lta	0.0625572	-1.75384	0.008	0.032	1	6
Plce1	0.187963	-1.75076	0.004	0.016	1	6
Abca4	0.0903402	-1.75033	0.004	0.021	1	6
Il2ra	0.578511	-1.74995	0.063	0.074	1	6
Sox13	0.120078	-1.74759	0.008	0.026	1	6
Rhbdf1	0.610843	-1.74627	0.02	0.026	1	6
Ccdc142	0.187963	-1.74525	0.004	0.016	1	6
Cdc25b	0.189503	-1.74486	0.004	0.016	1	6
Cep72	0.0840553	-1.74475	0.016	0.042	1	6
Irf9	2.52107e-07	-1.7446	0.181	0.376	0.00417236	6
Slc22a21	0.187963	-1.74094	0.004	0.016	1	6
Gcnt4	0.42749	-1.73984	0.008	0.016	1	6
Gpc1	0.424329	-1.73945	0.012	0.021	1	6
Gm20878	0.915091	-1.73882	0.012	0.011	1	6
Nhsl2	0.386403	-1.73808	0.024	0.037	1	6
Pde2a	0.189503	-1.73714	0.004	0.016	1	6
Noxred1	0.246178	-1.73507	0.012	0.026	1	6
Hk3	0.0444498	-1.7333	0	0.016	1	6
Dnah12	0.101404	-1.7321	0	0.011	1	6
Gabrr2	0.0444498	-1.73151	0	0.016	1	6
Shcbp1l	0.400994	-1.73118	0.004	0.011	1	6
Alpk2	0.030421	-1.72947	0.02	0.058	1	6
Myom1	0.057571	-1.72353	0.02	0.053	1	6
Ubxn11	0.247505	-1.72312	0.012	0.026	1	6
Kyat3	0.148934	-1.7231	0.016	0.037	1	6
Castor1	0.119252	-1.72062	0.008	0.026	1	6
Tbc1d19	0.0581438	-1.71872	0.055	0.101	1	6
Itgam	0.398038	-1.71826	0.004	0.011	1	6
Rin2	0.254023	-1.71815	0.02	0.037	1	6
Hsd3b8	0.398038	-1.71714	0.004	0.011	1	6
H2-Q4	2.09602e-20	-1.71584	0.386	0.735	3.46892e-16	6
BC024063	0.101404	-1.71508	0	0.011	1	6
Kcnk7	0.101404	-1.71481	0	0.011	1	6
Tbxas1	0.0895631	-1.71342	0.004	0.021	1	6
Ccdc63	0.187963	-1.71218	0.004	0.016	1	6
Mtcl1	0.101404	-1.70916	0	0.011	1	6
Hoxb4	0.0345265	-1.70532	0.028	0.069	1	6
Ptprd	0.101404	-1.70508	0	0.011	1	6
Dync2i1	0.400631	-1.70235	0.024	0.037	1	6
Lca5	0.00273551	-1.70161	0.091	0.18	1	6
Ngp	0.0903402	-1.70134	0.004	0.021	1	6
Pigg	0.0409586	-1.70118	0.047	0.095	1	6
Ggt7	0.398038	-1.70018	0.004	0.011	1	6
Klhl1	0.101404	-1.69929	0	0.011	1	6
Extl1	0.101404	-1.69192	0	0.011	1	6
Rab26	0.119252	-1.6903	0.008	0.026	1	6
Paqr3	0.892136	-1.68675	0.024	0.021	1	6
Bmp6	0.0337745	-1.68498	0.114	0.175	1	6
Rtn2	0.187963	-1.68492	0.004	0.016	1	6
Mamstr	0.101404	-1.68114	0	0.011	1	6
Fastkd3	0.232336	-1.68086	0.031	0.053	1	6
Lrp1b	0.398984	-1.67952	0.02	0.032	1	6
Ifi214	0.0332711	-1.67913	0.024	0.063	1	6
Adcy4	0.101404	-1.679	0	0.011	1	6
Stum	0.398038	-1.67785	0.004	0.011	1	6
Bod1	0.0345018	-1.67685	0.063	0.116	1	6
Mcm2	0.147946	-1.67664	0.035	0.063	1	6
Adamtsl2	0.0194238	-1.67609	0.024	0.069	1	6
Tnnt3	0.137258	-1.67566	0.012	0.032	1	6
Tnfsf10	0.0987712	-1.67448	0.031	0.063	1	6
Itih5	0.424329	-1.67418	0.012	0.021	1	6
Fah	0.425106	-1.6738	0.008	0.016	1	6
Cep89	0.0521306	-1.67376	0.02	0.053	1	6
Gm17949	0.764206	-1.6728	0.008	0.011	1	6
Hsh2d	0.0126576	-1.67273	0.031	0.085	1	6
Ifit1bl2	0.101404	-1.66654	0	0.011	1	6
Rab39	0.151402	-1.66612	0.035	0.063	1	6
Spryd4	0.424329	-1.66205	0.012	0.021	1	6
Wnt16	0.101404	-1.66179	0	0.011	1	6
Pgam2	0.00016921	-1.66119	0.205	0.344	1	6
Slc7a11	0.41672	-1.66066	0.016	0.026	1	6
Cd33	0.00116766	-1.66037	0.146	0.249	1	6
Asah2	0.0148282	-1.65827	0.016	0.058	1	6
Gm45902	0.144882	-1.65812	0.043	0.074	1	6
Pars2	0.226805	-1.65683	0.008	0.021	1	6
Epb41l3	0.187963	-1.6561	0.004	0.016	1	6
Zfp689	0.189503	-1.65568	0.004	0.016	1	6
Kazald1	0.398038	-1.65473	0.004	0.011	1	6
Gm3435	0.0404872	-1.65433	0.012	0.042	1	6
Trim30b	0.00711346	-1.64987	0.031	0.09	1	6
Art2a	0.479228	-1.64864	0.012	0.005	1	6
Ankmy1	0.0444498	-1.64539	0	0.016	1	6
Pfkfb2	0.0485782	-1.64514	0.016	0.048	1	6
Mief2	0.0413112	-1.64115	0.012	0.042	1	6
Entpd5	0.326499	-1.64098	0.039	0.058	1	6
Zfat	0.00808886	-1.6405	0.067	0.138	1	6
Armcx4	0.979216	-1.63869	0.016	0.016	1	6
Neurl1b	0.0630169	-1.63754	0.008	0.032	1	6
Lmln	0.403669	-1.63737	0.02	0.032	1	6
Cbarp	0.152425	-1.63675	0.031	0.058	1	6
Mecom	0.191053	-1.63617	0.004	0.016	1	6
Casp4	0.035979	-1.63497	0.063	0.116	1	6
Ubiad1	0.0745481	-1.63341	0.012	0.037	1	6
Kif20b	0.406811	-1.63286	0.02	0.032	1	6
Trpm2	0.0435775	-1.63279	0.004	0.026	1	6
Olfml2a	0.228248	-1.62751	0.008	0.021	1	6
Slc39a4	0.0444498	-1.62664	0	0.016	1	6
Crmp1	0.101404	-1.62638	0	0.011	1	6
Znrd2	0.400994	-1.62574	0.004	0.011	1	6
Wfdc21	0.229699	-1.62453	0.008	0.021	1	6
Ms4a4a	0.101404	-1.62438	0	0.011	1	6
Map2	0.229699	-1.62316	0.008	0.021	1	6
Igsf6	0.189503	-1.62084	0.004	0.016	1	6
Dnm3	0.147373	-1.61635	0.016	0.037	1	6
Lif	0.101404	-1.60945	0	0.011	1	6
Ifi209	0.00165224	-1.60455	0.201	0.307	1	6
Susd2	0.760715	-1.60402	0.008	0.011	1	6
Parp14	0.000773378	-1.60381	0.13	0.243	1	6
Gvin1	0.158014	-1.60265	0.031	0.058	1	6
Stab2	0.425106	-1.60217	0.008	0.016	1	6
6030458C11Rik	0.00465122	-1.60192	0.087	0.169	1	6
Tmem209	0.0170856	-1.60015	0.047	0.106	1	6
Tlcd4	0.760715	-1.59929	0.008	0.011	1	6
Brca1	0.226805	-1.59905	0.008	0.021	1	6
Ikbke	0.89034	-1.59699	0.063	0.063	1	6
Zc2hc1c	0.229699	-1.59565	0.008	0.021	1	6
Parm1	0.915091	-1.59298	0.012	0.011	1	6
6430548M08Rik	0.158148	-1.59271	0.028	0.053	1	6
Phka2	0.0402187	-1.5924	0.118	0.175	1	6
Card6	7.97742e-06	-1.59164	0.24	0.397	0.132026	6
Zswim1	0.148783	-1.59131	0.031	0.058	1	6
4930563E22Rik	0.187963	-1.58993	0.004	0.016	1	6
Rffl	0.0119278	-1.58822	0.13	0.206	1	6
Ccr10	0.400994	-1.58802	0.004	0.011	1	6
Gm7609	0.041035	-1.58628	0.012	0.042	1	6
S1pr3	0.101404	-1.58531	0	0.011	1	6
Star	0.0903402	-1.58212	0.004	0.021	1	6
Pcgf1	0.0488718	-1.57373	0.016	0.048	1	6
Gfm1	0.0802899	-1.57298	0.063	0.106	1	6
Slc8b1	0.000184082	-1.57222	0.098	0.222	1	6
H2bc21	0.338506	-1.57011	0.063	0.085	1	6
Acadl	9.46383e-08	-1.56675	0.339	0.534	0.00156626	6
Ikzf4	0.783412	-1.56674	0.02	0.016	1	6
Sema6d	0.0260654	-1.56663	0.035	0.085	1	6
Angptl3	0.459371	-1.56639	0.02	0.011	1	6
Snx14	0.0385807	-1.56437	0.035	0.079	1	6
Fignl1	0.398038	-1.56305	0.004	0.011	1	6
Parp9	0.000238042	-1.56222	0.161	0.286	1	6
Coro2b	0.25737	-1.56131	0.02	0.037	1	6
Dynlrb2	0.0759827	-1.55762	0.012	0.037	1	6
Slc43a3	0.0352074	-1.55554	0.047	0.095	1	6
ENSMUSG00000095742	0.23971	-1.54957	0.028	0.048	1	6
Zfp493	0.398038	-1.54872	0.004	0.011	1	6
Pdcd1	0.379492	-1.54676	0.028	0.042	1	6
Klra7	0.760715	-1.54607	0.008	0.011	1	6
Ube2cbp	0.0948918	-1.54522	0.024	0.053	1	6
Mtmr7	0.424329	-1.54445	0.012	0.021	1	6
Rab11fip4	0.0354274	-1.54227	0.028	0.069	1	6
Adgrl4	0.121743	-1.53965	0.008	0.026	1	6
Wdr49	0.425106	-1.53915	0.008	0.016	1	6
Zfp239	0.981986	-1.53508	0.016	0.016	1	6
Mfsd9	0.425106	-1.53494	0.008	0.016	1	6
Nme2	2.55787e-05	-1.53407	0.157	0.302	0.423328	6
Mreg	0.00514489	-1.53376	0.079	0.164	1	6
Bex6	0.234056	-1.53218	0.031	0.053	1	6
Esr1	0.405925	-1.53119	0.047	0.063	1	6
Fn3krp	0.422025	-1.52838	0.016	0.026	1	6
Hs1bp3	0.386403	-1.52527	0.024	0.037	1	6
Klhl35	0.428368	-1.52309	0.012	0.021	1	6
Casc1	0.785912	-1.5201	0.02	0.016	1	6
Ablim3	0.398038	-1.51885	0.004	0.011	1	6
Zfp174	0.425106	-1.51858	0.008	0.016	1	6
Plekha8	0.0488718	-1.51573	0.016	0.048	1	6
Cblc	0.422025	-1.5137	0.016	0.026	1	6
Ctdspl	0.187963	-1.51231	0.004	0.016	1	6
Ifitm10	0.259619	-1.50837	0.02	0.037	1	6
Nat2	0.0382238	-1.50761	0.063	0.116	1	6
Stap2	0.0903402	-1.50734	0.004	0.021	1	6
Zfp707	0.273607	-1.50652	0.047	0.069	1	6
Gm49804	0.101404	-1.50562	0	0.011	1	6
Nectin4	0.271233	-1.50502	0.051	0.074	1	6
St8sia6	0.00148705	-1.49888	0.087	0.185	1	6
Thrb	0.583483	-1.49831	0.024	0.032	1	6
Sema3c	0.00822374	-1.4977	0.016	0.063	1	6
AI597479	0.250979	-1.49595	0.063	0.09	1	6
Cpt2	0.669802	-1.49551	0.039	0.048	1	6
Lrp1	0.619044	-1.49311	0.02	0.026	1	6
Gcm2	0.138072	-1.48958	0.012	0.032	1	6
Mthfr	0.413637	-1.4895	0.067	0.085	1	6
Rasal1	0.229699	-1.48873	0.008	0.021	1	6
Rbm20	0.189503	-1.48628	0.004	0.016	1	6
Zfp428	0.161139	-1.48618	0.02	0.042	1	6
Exo5	0.123225	-1.48582	0.055	0.09	1	6
Tmem53	0.767701	-1.4842	0.008	0.011	1	6
Mill2	0.189503	-1.48194	0.004	0.016	1	6
Mex3d	0.138072	-1.48018	0.012	0.032	1	6
Cd4	2.08658e-14	-1.48007	0.488	0.73	3.45329e-10	6
Axin2	0.0910708	-1.47964	0.02	0.048	1	6
Pate2	0.398038	-1.47947	0.004	0.011	1	6
Il27	0.398038	-1.47869	0.004	0.011	1	6
H2ac6	0.0272006	-1.47794	0.043	0.095	1	6
Plekhn1	0.405238	-1.47782	0.02	0.032	1	6
Xlr5a	0.0864764	-1.47762	0.016	0.042	1	6
F2r	0.324493	-1.47416	0.039	0.058	1	6
Gm527	0.139711	-1.4741	0.012	0.032	1	6
Asap3	0.398038	-1.47408	0.004	0.011	1	6
Pparg	0.398038	-1.47317	0.004	0.011	1	6
Serpina3g	0.003937	-1.47253	0.098	0.185	1	6
Cntln	0.229861	-1.4675	0.063	0.09	1	6
Il11ra1	3.21893e-08	-1.46732	0.169	0.386	0.000532734	6
Zwilch	0.232619	-1.46546	0.008	0.021	1	6
Cacng8	0.398038	-1.46265	0.004	0.011	1	6
Gria4	0.187963	-1.45963	0.004	0.016	1	6
Gemin5	0.611387	-1.45867	0.098	0.106	1	6
Plxnd1	0.000606381	-1.45857	0.055	0.148	1	6
Zbtb7b	0.405238	-1.45708	0.02	0.032	1	6
Plppr3	0.144288	-1.45652	0.016	0.037	1	6
Clmp	0.0162501	-1.45537	0.047	0.106	1	6
Plod3	0.0579492	-1.45495	0.059	0.106	1	6
Nphp3	0.0943876	-1.45457	0.039	0.074	1	6
Dcakd	0.126949	-1.45282	0.102	0.143	1	6
Sbf2	3.74583e-05	-1.4517	0.098	0.243	0.619934	6
Fsd2	0.709226	-1.4497	0.012	0.016	1	6
Tbx6	0.398038	-1.44899	0.004	0.011	1	6
Ifnlr1	0.101404	-1.44726	0	0.011	1	6
G0s2	0.964885	-1.44516	0.028	0.026	1	6
Klra5	0.767701	-1.44421	0.008	0.011	1	6
2900026A02Rik	0.902252	-1.44304	0.02	0.021	1	6
Ccnb1	0.398038	-1.44255	0.004	0.011	1	6
Gvin2	0.203722	-1.44205	0.043	0.069	1	6
Spaca6	0.426346	-1.43994	0.012	0.021	1	6
Zfp839	0.195044	-1.43962	0.047	0.074	1	6
Ptp4a1.1	0.420059	-1.43794	0.028	0.016	1	6
Tlcd3a	0.158813	-1.43691	0.028	0.053	1	6
St14	0.0614471	-1.4359	0.028	0.063	1	6
Sbspon	0.610843	-1.43457	0.02	0.026	1	6
Poglut3	0.251171	-1.43395	0.016	0.032	1	6
Abca17	0.0634793	-1.43387	0.008	0.032	1	6
Samd9l	0.00824541	-1.43365	0.161	0.243	1	6
Ralb	0.229699	-1.43206	0.008	0.021	1	6
Nudt17	0.760715	-1.42753	0.008	0.011	1	6
Tmem107	0.163776	-1.42693	0.024	0.048	1	6
Epb41l5	0.398038	-1.42648	0.004	0.011	1	6
Tex9	0.162751	-1.42157	0.067	0.101	1	6
Ncaph	0.760715	-1.42152	0.008	0.011	1	6
Cdh10	0.400994	-1.42057	0.004	0.011	1	6
Septin10	0.444631	-1.41945	0.043	0.058	1	6
Niban3	0.0182467	-1.41893	0.114	0.185	1	6
Kif11	0.425106	-1.41846	0.008	0.016	1	6
Cgref1	0.398038	-1.41824	0.004	0.011	1	6
Trim55	0.122582	-1.41685	0.008	0.026	1	6
Bmf	0.251808	-1.41677	0.02	0.037	1	6
Irf7	1.00812e-05	-1.41559	0.366	0.487	0.166843	6
Fanci	0.398038	-1.41489	0.004	0.011	1	6
Slc29a4	0.760715	-1.4147	0.008	0.011	1	6
Shpk	0.0986224	-1.41466	0.024	0.053	1	6
Scai	0.0114956	-1.41464	0.213	0.286	1	6
Amer1	0.581652	-1.4137	0.024	0.032	1	6
Mcoln1	0.377196	-1.41349	0.071	0.09	1	6
Mmut	0.0454813	-1.41222	0.079	0.132	1	6
Arhgap19	0.387812	-1.41121	0.024	0.037	1	6
Fndc7	0.189503	-1.41087	0.004	0.016	1	6
Acyp2	0.104489	-1.40948	0.035	0.069	1	6
Ccl24	0.101404	-1.40771	0	0.011	1	6
Slc26a11	0.182701	-1.40727	0.083	0.048	1	6
Tlcd1	0.0874604	-1.40566	0.016	0.042	1	6
Gm17660	0.189503	-1.40534	0.004	0.016	1	6
Fcer2a	0.763973	-1.40267	0.028	0.032	1	6
Eeig2	0.0157136	-1.4026	0.189	0.265	1	6
Gm44511	0.0145515	-1.40226	0.083	0.153	1	6
Slc38a7	0.174503	-1.40197	0.067	0.101	1	6
Flrt1	0.425106	-1.40193	0.008	0.016	1	6
Lrp5	0.149091	-1.39912	0.035	0.063	1	6
Ap1m2	0.0610793	-1.39862	0.043	0.085	1	6
Papss2	0.876021	-1.3968	0.024	0.021	1	6
Zbp1	0.0373652	-1.39358	0.083	0.138	1	6
Zfp952	0.106857	-1.39067	0.091	0.132	1	6
Lrrc4c	0.0500609	-1.38736	0.016	0.048	1	6
Fsip1	0.65467	-1.38572	0.016	0.021	1	6
Plvap	0.251517	-1.38424	0.012	0.026	1	6
Rem2	0.192612	-1.38422	0.004	0.016	1	6
Slc25a27	0.0929821	-1.38336	0.02	0.048	1	6
Pwwp2b	0.140536	-1.38269	0.012	0.032	1	6
Pik3r4	0.0350588	-1.38224	0.067	0.122	1	6
Colgalt2	0.101404	-1.38161	0	0.011	1	6
Adgre4	0.398038	-1.38081	0.004	0.011	1	6
Ticam2	0.0874604	-1.38007	0.016	0.042	1	6
Tgfbi	0.101404	-1.37998	0	0.011	1	6
Fam167a	0.429883	-1.3792	0.008	0.016	1	6
Hdhd5	0.43583	-1.37518	0.11	0.127	1	6
Lcn2	0.101404	-1.36902	0	0.011	1	6
Mis18bp1	0.232619	-1.3676	0.008	0.021	1	6
Iqch	0.976445	-1.36719	0.016	0.016	1	6
Hyls1	0.403767	-1.36693	0.047	0.063	1	6
Arhgef5	0.976445	-1.36683	0.016	0.016	1	6
Dmwd	0.97765	-1.36679	0.028	0.026	1	6
Arhgap39	0.188757	-1.36522	0.224	0.259	1	6
Slc41a3	0.402104	-1.36479	0.02	0.032	1	6
Khnyn	0.000810396	-1.36463	0.122	0.233	1	6
H1f10	0.189503	-1.36449	0.004	0.016	1	6
Nectin2	0.425106	-1.36383	0.008	0.016	1	6
Bglap3	0.418484	-1.36216	0.016	0.026	1	6
Megf8	0.403669	-1.36171	0.02	0.032	1	6
Cdkl4	0.123426	-1.36151	0.008	0.026	1	6
Ergic1	2.4947e-07	-1.36053	0.303	0.492	0.00412872	6
Kcnip4	0.398038	-1.35982	0.004	0.011	1	6
BC147527	2.71639e-10	-1.35877	0.248	0.508	4.49563e-06	6
Cacnb1	0.252377	-1.35724	0.016	0.032	1	6
Marchf8	0.42749	-1.35642	0.008	0.016	1	6
Bhlha15	0.258493	-1.35638	0.02	0.037	1	6
Calhm6	0.196814	-1.35477	0.051	0.079	1	6
Hbegf	0.428368	-1.35018	0.012	0.021	1	6
Treml2	0.119758	-1.34669	0.134	0.175	1	6
Chsy3	0.398038	-1.34627	0.004	0.011	1	6
Gpr25	0.398038	-1.34173	0.004	0.011	1	6
Zfp189	0.668822	-1.34136	0.016	0.021	1	6
Mndal	2.86674e-10	-1.34026	0.571	0.735	4.74446e-06	6
6430550D23Rik	0.243538	-1.33701	0.012	0.026	1	6
BC025920	0.828941	-1.33639	0.039	0.042	1	6
Prss36	0.479315	-1.33625	0.035	0.048	1	6
Harbi1	0.153153	-1.33581	0.035	0.063	1	6
Pop1	0.0618329	-1.3354	0.043	0.085	1	6
Wwc1	0.189503	-1.33486	0.004	0.016	1	6
Kcnk10	0.0972099	-1.3337	0.024	0.053	1	6
H4c16	0.00232103	-1.33264	0.118	0.222	1	6
Slfn1	0.232619	-1.3309	0.008	0.021	1	6
Or10aa1	0.398038	-1.32859	0.004	0.011	1	6
5430403G16Rik	0.205395	-1.32732	0.047	0.074	1	6
Adarb1	0.42749	-1.32717	0.008	0.016	1	6
Tepsin	0.330783	-1.32697	0.035	0.053	1	6
Fosl1	0.425106	-1.32689	0.008	0.016	1	6
Zfp160	0.0254699	-1.3242	0.138	0.206	1	6
Nnat	0.252913	-1.32385	0.02	0.037	1	6
H2-T22	2.08917e-09	-1.32323	0.327	0.55	3.45757e-05	6
Abcg2	0.255668	-1.32073	0.055	0.079	1	6
Epb41l1	0.0599182	-1.31939	0.024	0.058	1	6
Pard6g	0.426346	-1.31824	0.012	0.021	1	6
Fchsd1	0.0954164	-1.31775	0.02	0.048	1	6
Tmem94	0.734704	-1.31647	0.079	0.085	1	6
Chaf1b	0.424329	-1.31615	0.012	0.021	1	6
Tsga10	0.180881	-1.31526	0.083	0.116	1	6
Rad18	0.0262409	-1.31322	0.043	0.095	1	6
H2-K1	2.35789e-41	-1.31227	0.925	0.979	3.9023e-37	6
Sh3bp2	0.00896445	-1.31154	0.079	0.153	1	6
Slc17a9	0.404577	-1.31113	0.051	0.069	1	6
Stau2	0.0127935	-1.31082	0.094	0.169	1	6
Cxcr5	0.355811	-1.30718	0.035	0.053	1	6
Gm1123	0.398038	-1.30591	0.004	0.011	1	6
Chac2	0.241025	-1.30554	0.031	0.053	1	6
Gca	0.0013582	-1.3051	0.02	0.085	1	6
Ripk4	0.232619	-1.30214	0.008	0.021	1	6
Cenpi	0.0958137	-1.30105	0.024	0.053	1	6
Gabbr1	0.204993	-1.30093	0.071	0.101	1	6
Ltbr	0.597649	-1.30028	0.043	0.053	1	6
1700003F12Rik	0.101404	-1.29901	0	0.011	1	6
Rap2a	0.0472813	-1.29801	0.091	0.143	1	6
Zfp575	0.398038	-1.29737	0.004	0.011	1	6
Dolk	0.205771	-1.29708	0.043	0.069	1	6
Mcm8	0.255135	-1.29665	0.02	0.037	1	6
Lilrb4a	0.587784	-1.29534	0.043	0.053	1	6
Lgals9	2.18954e-05	-1.29097	0.236	0.386	0.362369	6
Metrnl	0.393478	-1.29072	0.024	0.037	1	6
Pira13	0.398038	-1.29055	0.004	0.011	1	6
Rras	0.0343194	-1.28929	0.071	0.127	1	6
Usp27x	0.398038	-1.28873	0.004	0.011	1	6
Gcfc2	0.645604	-1.2869	0.059	0.069	1	6
Slc6a19	0.703655	-1.28669	0.012	0.016	1	6
Ggta1	0.0104303	-1.28442	0.11	0.19	1	6
Il12rb2	0.00266598	-1.28348	0.181	0.286	1	6
Slx4	0.996185	-1.28296	0.055	0.053	1	6
Gm45928	0.760715	-1.28071	0.008	0.011	1	6
Mettl17	0.0566235	-1.28003	0.079	0.127	1	6
Sec1	0.425106	-1.27897	0.008	0.016	1	6
Camk1	0.426346	-1.27797	0.012	0.021	1	6
Fam234a	0.625307	-1.27607	0.059	0.069	1	6
Cdc23	0.142582	-1.27521	0.075	0.111	1	6
Cryzl2	0.359097	-1.27511	0.055	0.074	1	6
Cd59a	0.511983	-1.27177	0.031	0.042	1	6
Sp100	1.29444e-12	-1.27164	0.504	0.704	2.1423e-08	6
Tmem184b	6.75626e-05	-1.27085	0.193	0.344	1	6
Amelx	0.400994	-1.26998	0.004	0.011	1	6
Cxcl16	0.120908	-1.26991	0.008	0.026	1	6
Zfp507	0.323634	-1.26884	0.079	0.101	1	6
Ccdc40	0.430397	-1.26787	0.012	0.021	1	6
Wdr95	0.712018	-1.26753	0.012	0.016	1	6
Taf8	0.0874403	-1.26728	0.087	0.132	1	6
Bbs5	0.143337	-1.26594	0.043	0.074	1	6
Fam131a	0.231155	-1.26587	0.008	0.021	1	6
Gm53012	0.516475	-1.26446	0.031	0.042	1	6
Traf1	0.000172251	-1.26432	0.22	0.354	1	6
Nxt2	0.33104	-1.26176	0.039	0.058	1	6
Lrrc75a	0.263017	-1.25863	0.02	0.037	1	6
Cd101	0.709226	-1.25858	0.012	0.016	1	6
Pomk	0.151608	-1.25842	0.028	0.053	1	6
Ly6i	0.429883	-1.2582	0.008	0.016	1	6
Zbtb22	0.0644167	-1.25737	0.031	0.069	1	6
Anxa2	1.09373e-07	-1.25655	0.343	0.529	0.00181013	6
Gm49711	0.429883	-1.25641	0.008	0.016	1	6
Myo6	0.0669274	-1.25576	0.039	0.079	1	6
Zfp940	0.248837	-1.25431	0.012	0.026	1	6
Adap1	0.193746	-1.25293	0.051	0.079	1	6
Wdr72	0.398038	-1.25275	0.004	0.011	1	6
Tmem120b	0.186118	-1.25075	0.055	0.085	1	6
Phf21b	0.398038	-1.2496	0.004	0.011	1	6
Tmem140	0.0583614	-1.24924	0.063	0.111	1	6
B4galt4	0.250175	-1.24832	0.012	0.026	1	6
Ift43	0.429883	-1.24825	0.008	0.016	1	6
H2-M3	1.89889e-11	-1.24651	0.469	0.704	3.14266e-07	6
Zfp229	0.411551	-1.24635	0.02	0.032	1	6
Tk1	0.823322	-1.24495	0.055	0.058	1	6
Sned1	0.703655	-1.24458	0.012	0.016	1	6
Zfp975	0.590595	-1.24441	0.043	0.053	1	6
Myzap	7.60314e-05	-1.24278	0.256	0.402	1	6
Ly6g5b	0.0166253	-1.24102	0.047	0.106	1	6
Pml	2.92209e-06	-1.2398	0.37	0.513	0.0483606	6
Pard6b	0.141364	-1.23927	0.012	0.032	1	6
Zfp976	0.760715	-1.23893	0.008	0.011	1	6
Gna14	0.398038	-1.23841	0.004	0.011	1	6
Erich1	0.0692299	-1.23736	0.094	0.148	1	6
Trim34a	0.0171673	-1.23633	0.102	0.175	1	6
Kat14	0.040121	-1.236	0.091	0.148	1	6
Ociad2	0.140507	-1.23473	0.047	0.079	1	6
Gm5148	0.398038	-1.23381	0.004	0.011	1	6
Ccdc141	0.0789196	-1.23043	0.012	0.037	1	6
Chaf1a	0.43469	-1.23007	0.008	0.016	1	6
4930556J24Rik	0.248163	-1.22894	0.028	0.048	1	6
Sardh	0.142197	-1.22839	0.012	0.032	1	6
Pstpip2	0.0434976	-1.22827	0.035	0.079	1	6
Fcrl5	0.234089	-1.22683	0.008	0.021	1	6
Cnih3	0.191053	-1.22307	0.004	0.016	1	6
Nubpl	0.0702378	-1.22271	0.13	0.18	1	6
Zfp35	0.0610078	-1.22174	0.039	0.079	1	6
Shroom4	0.398038	-1.21946	0.004	0.011	1	6
Zfp438	0.0203179	-1.2188	0.094	0.164	1	6
Ccdc163	0.351211	-1.21861	0.031	0.048	1	6
Slc38a11	0.39633	-1.2183	0.024	0.037	1	6
Ccr6	0.000442606	-1.21625	0.051	0.148	1	6
H6pd	0.201467	-1.21618	0.047	0.074	1	6
Mas1	0.400994	-1.21477	0.004	0.011	1	6
Adam2	0.425106	-1.21453	0.008	0.016	1	6
Pira2	0.191053	-1.21359	0.004	0.016	1	6
Men1	0.0410872	-1.21316	0.055	0.106	1	6
Gm10135	0.231155	-1.21129	0.008	0.021	1	6
Clip2	0.58358	-1.20891	0.043	0.053	1	6
6030468B19Rik	0.408387	-1.20805	0.02	0.032	1	6
Fam161a	0.915091	-1.2078	0.012	0.011	1	6
Mex3a	0.191053	-1.20741	0.004	0.016	1	6
Klf16	0.0652679	-1.20601	0.039	0.079	1	6
Acpp	0.0919105	-1.20599	0.004	0.021	1	6
Znfx1	0.0764357	-1.20408	0.079	0.127	1	6
Gm50139	0.429883	-1.20404	0.008	0.016	1	6
Prss12	0.146416	-1.20311	0.012	0.032	1	6
Mov10	0.219813	-1.20258	0.043	0.069	1	6
Ercc6l	0.890107	-1.20238	0.02	0.021	1	6
Smad6	0.400994	-1.20058	0.004	0.011	1	6
Shcbp1	0.42749	-1.20035	0.008	0.016	1	6
Itgae	0.883627	-1.19937	0.051	0.053	1	6
Zfp846	0.534573	-1.19881	0.051	0.063	1	6
Ttc36	0.400994	-1.19827	0.004	0.011	1	6
Lyrm1	0.1808	-1.19684	0.059	0.09	1	6
Irak4	0.253854	-1.19682	0.165	0.19	1	6
Zc3h7b	0.30757	-1.19599	0.087	0.111	1	6
Ehhadh	0.943746	-1.1943	0.031	0.032	1	6
Krt83	0.426346	-1.19343	0.012	0.021	1	6
Clec2g	0.651559	-1.19053	0.016	0.011	1	6
Zfp462	0.915091	-1.18952	0.012	0.011	1	6
Il18bp	0.191053	-1.18684	0.004	0.016	1	6
Lrp4	0.631434	-1.18592	0.02	0.026	1	6
Gm49322	0.398038	-1.18501	0.004	0.011	1	6
Dnajc12	0.258493	-1.18447	0.02	0.037	1	6
Ptpn3	0.0954331	-1.184	0.083	0.127	1	6
Ms4a1	0.39633	-1.18174	0.024	0.037	1	6
Acvrl1	0.760715	-1.18063	0.008	0.011	1	6
Serpinc1	0.123595	-1.18023	0.087	0.127	1	6
Zfp366	0.714813	-1.17983	0.012	0.016	1	6
B2m	7.55169e-43	-1.17951	0.957	0.984	1.24981e-38	6
Cfap299	0.398038	-1.17787	0.004	0.011	1	6
Rslcan18	0.400994	-1.17718	0.004	0.011	1	6
Myl4	0.25847	-1.17658	0.016	0.032	1	6
2010109A12Rik	0.3834	-1.17604	0.028	0.042	1	6
Mafb	0.712018	-1.17575	0.012	0.016	1	6
Lrrc25	0.229699	-1.17538	0.008	0.021	1	6
Gdpd5	0.0404872	-1.17522	0.012	0.042	1	6
Nme6	0.500444	-1.1752	0.075	0.09	1	6
Il36g	0.429883	-1.17475	0.008	0.016	1	6
Esrrg	0.908587	-1.17253	0.012	0.011	1	6
Wrnip1	0.979163	-1.17219	0.094	0.09	1	6
Tdrd7	0.565455	-1.17088	0.047	0.058	1	6
Kcnc3	0.400994	-1.17031	0.004	0.011	1	6
Ntm	0.258305	-1.16988	0.012	0.026	1	6
Tm4sf5	0.272122	-1.16963	0.055	0.079	1	6
Idh1	0.0674467	-1.16893	0.035	0.074	1	6
Gbp9	0.037779	-1.16823	0.051	0.101	1	6
Gli2	0.400994	-1.16776	0.004	0.011	1	6
Mms22l	0.0660042	-1.16753	0.102	0.153	1	6
Zbtb16	0.68157	-1.16703	0.035	0.042	1	6
Ap1g2	0.0172194	-1.16597	0.094	0.164	1	6
1500009L16Rik	0.661731	-1.16435	0.016	0.021	1	6
Cmtm8	0.42749	-1.16378	0.008	0.016	1	6
Ampd3	0.113918	-1.16258	0.102	0.143	1	6
Tmc4	0.666455	-1.16144	0.016	0.021	1	6
Tektip1	0.160151	-1.16089	0.028	0.053	1	6
Ptges3l	0.400994	-1.15816	0.004	0.011	1	6
Acot6	0.432282	-1.15796	0.008	0.016	1	6
Sulf1	0.706439	-1.15776	0.012	0.016	1	6
Sccpdh	0.389224	-1.1576	0.024	0.037	1	6
Epha1	0.428368	-1.15688	0.012	0.021	1	6
Tubd1	0.46221	-1.15414	0.039	0.053	1	6
Zfp267	0.65467	-1.15413	0.016	0.021	1	6
Ccdc162	0.000565225	-1.15235	0.244	0.365	1	6
Igip	0.26363	-1.15227	0.024	0.042	1	6
Upp1	0.429883	-1.15145	0.008	0.016	1	6
Chst3	0.467643	-1.15127	0.138	0.106	1	6
Rbm12b1	0.386403	-1.15045	0.024	0.037	1	6
Adam12	0.657021	-1.15032	0.016	0.021	1	6
Pomc	0.232451	-1.14923	0.035	0.058	1	6
Gstm5	0.428368	-1.14911	0.012	0.021	1	6
Crispld2	0.426346	-1.14785	0.012	0.021	1	6
Slc31a2	0.164667	-1.14729	0.067	0.101	1	6
Kazn	0.192612	-1.14678	0.004	0.016	1	6
Nqo2	0.10399	-1.14663	0.031	0.063	1	6
Itpka	0.703655	-1.14454	0.012	0.016	1	6
Gm7995	0.400994	-1.14369	0.004	0.011	1	6
Map7d3	0.716763	-1.14337	0.031	0.037	1	6
Zfp90	0.12487	-1.14284	0.083	0.122	1	6
Slc2a6	0.0126718	-1.14241	0.193	0.27	1	6
Jrkl	0.187268	-1.14198	0.055	0.085	1	6
Pnpla1	0.703655	-1.14186	0.012	0.016	1	6
Scd1	0.43447	-1.13998	0.012	0.021	1	6
Nlrc5	1.19135e-06	-1.13981	0.272	0.46	0.0197169	6
1700001P01Rik	0.400994	-1.13874	0.004	0.011	1	6
Mss51	0.251987	-1.13689	0.028	0.048	1	6
Cyhr1	0.13686	-1.13564	0.051	0.085	1	6
Il18r1	0.505811	-1.13295	0.098	0.116	1	6
Ttc30a1	0.429883	-1.13134	0.008	0.016	1	6
Ackr4	0.42749	-1.13122	0.008	0.016	1	6
3300002I08Rik	0.779072	-1.13022	0.043	0.048	1	6
Htr2b	0.398038	-1.12889	0.004	0.011	1	6
Il1r1	0.847796	-1.12809	0.039	0.042	1	6
Aire	0.122582	-1.12746	0.008	0.026	1	6
Dennd10	0.21478	-1.12664	0.134	0.164	1	6
Arhgef26	0.42749	-1.12528	0.008	0.016	1	6
Ccdc30	0.915091	-1.12516	0.012	0.011	1	6
Zfp791	0.191053	-1.12458	0.004	0.016	1	6
Gys1	0.304303	-1.12353	0.047	0.069	1	6
Kctd21	0.382196	-1.12332	0.024	0.037	1	6
Gigyf1	0.230467	-1.12215	0.201	0.228	1	6
Plau	0.717612	-1.12193	0.012	0.016	1	6
Them4	0.161907	-1.12166	0.02	0.042	1	6
Dab2ip	0.628364	-1.12153	0.035	0.026	1	6
Eola1	0.0851255	-1.12099	0.087	0.132	1	6
Pira12	0.420252	-1.12078	0.016	0.026	1	6
Adal	0.108368	-1.11941	0.047	0.085	1	6
Zfp955b	0.0760412	-1.1191	0.071	0.116	1	6
Swap70	9.5695e-06	-1.11816	0.303	0.476	0.158375	6
Fam229b	0.760715	-1.11815	0.008	0.011	1	6
Setdb2	0.00467654	-1.11733	0.114	0.206	1	6
Pms1	0.0642794	-1.11732	0.083	0.132	1	6
Eogt	0.998295	-1.1171	0.043	0.042	1	6
Nek11	0.429883	-1.11598	0.008	0.016	1	6
Lrrc10b	0.400994	-1.11554	0.004	0.011	1	6
Gss	0.148002	-1.11548	0.075	0.111	1	6
Acvr1b	0.510175	-1.11489	0.051	0.063	1	6
Sgcb	0.0462809	-1.11485	0.146	0.206	1	6
Otogl	0.400994	-1.1145	0.004	0.011	1	6
Cemip2	0.30879	-1.1135	0.114	0.138	1	6
Armc5	0.884574	-1.1131	0.079	0.079	1	6
Lpar2	0.423802	-1.11254	0.016	0.026	1	6
Lzts2	0.379481	-1.11244	0.075	0.095	1	6
Slc25a42	0.459674	-1.10925	0.039	0.053	1	6
Trpv4	0.398038	-1.10847	0.004	0.011	1	6
Tmem216	0.257584	-1.10737	0.094	0.122	1	6
Cep70	0.0766068	-1.10652	0.118	0.169	1	6
Dnaaf3	0.392057	-1.10577	0.024	0.037	1	6
Nos3	0.83354	-1.1057	0.024	0.026	1	6
Ttc39d	0.398038	-1.10527	0.004	0.011	1	6
Rabl2	0.663474	-1.10303	0.035	0.042	1	6
Phldb1	0.422025	-1.10231	0.016	0.026	1	6
2610318N02Rik	0.706439	-1.10198	0.012	0.016	1	6
Gbp4	0.00176545	-1.10179	0.193	0.307	1	6
Smyd1	0.00553397	-1.10171	0.28	0.37	1	6
Hemgn	0.428368	-1.10088	0.012	0.021	1	6
Fam210a	0.241428	-1.10084	0.094	0.122	1	6
Npcd	0.398038	-1.09936	0.004	0.011	1	6
Rtel1	0.511983	-1.09858	0.031	0.042	1	6
Cnst	0.289787	-1.09797	0.071	0.095	1	6
Rhpn2	0.398038	-1.09649	0.004	0.011	1	6
Gm4724	0.250175	-1.09648	0.012	0.026	1	6
Hlcs	0.198375	-1.0955	0.224	0.254	1	6
Clmn	0.429883	-1.09344	0.008	0.016	1	6
Lancl2	0.566883	-1.09271	0.043	0.032	1	6
Exoc7	0.00440252	-1.09253	0.181	0.275	1	6
Dcun1d3	0.0927588	-1.09215	0.055	0.095	1	6
Phf11c	0.259701	-1.09198	0.016	0.032	1	6
Lurap1	0.400994	-1.09074	0.004	0.011	1	6
Invs	0.305377	-1.08982	0.126	0.148	1	6
Gcnt2	0.923284	-1.08961	0.157	0.148	1	6
Exoc8	0.930906	-1.08932	0.051	0.048	1	6
Zfp623	0.429883	-1.08928	0.008	0.016	1	6
Hps3	0.0323849	-1.0889	0.209	0.28	1	6
Nudt13	0.474721	-1.0878	0.11	0.127	1	6
Ublcp1	0.0435142	-1.08493	0.169	0.228	1	6
Pfn2	0.619044	-1.08472	0.02	0.026	1	6
Cep55	0.760715	-1.08298	0.008	0.011	1	6
Nup210l	0.206381	-1.08011	0.055	0.085	1	6
Il9r	0.0234002	-1.08007	0.083	0.148	1	6
Slc6a20b	0.42749	-1.07964	0.008	0.016	1	6
Atp6v1g3	0.400994	-1.077	0.004	0.011	1	6
Il17f	0.915091	-1.07667	0.012	0.011	1	6
Gm45062	0.0434052	-1.07611	0.059	0.111	1	6
Smim10l2a	0.400994	-1.07514	0.004	0.011	1	6
Aldh18a1	0.972255	-1.07503	0.071	0.069	1	6
Atp8a2	0.380792	-1.07492	0.028	0.042	1	6
Cenpl	0.768023	-1.07473	0.059	0.063	1	6
F11r	0.672161	-1.07445	0.118	0.127	1	6
Tspear	0.400994	-1.07361	0.004	0.011	1	6
Ufsp1	0.43243	-1.07216	0.012	0.021	1	6
Hmgxb3	0.115969	-1.07203	0.102	0.148	1	6
Jmjd4	0.709226	-1.0707	0.012	0.016	1	6
Gstm4	0.984652	-1.07039	0.043	0.042	1	6
Mettl25	0.0297322	-1.0701	0.197	0.259	1	6
Kdm4d	0.343696	-1.06944	0.035	0.053	1	6
Kif3c	0.0658958	-1.06899	0.051	0.095	1	6
Fbxw17	0.524744	-1.06894	0.051	0.063	1	6
P3h3	0.65467	-1.06849	0.016	0.021	1	6
1700019D03Rik	0.425106	-1.06807	0.008	0.016	1	6
Fgl2	0.525519	-1.06718	0.031	0.042	1	6
Ttc41	0.886482	-1.06603	0.035	0.037	1	6
AA467197	0.126131	-1.06586	0.063	0.101	1	6
Cped1	0.587152	-1.06496	0.024	0.032	1	6
Ehbp1	0.104054	-1.06472	0.043	0.079	1	6
Cep85	0.148426	-1.06175	0.169	0.212	1	6
Prps1l3	0.578291	-1.06173	0.067	0.079	1	6
Pam16l	0.232619	-1.0616	0.008	0.021	1	6
L3mbtl4	0.915091	-1.06109	0.012	0.011	1	6
Stx11	0.0900439	-1.05937	0.063	0.106	1	6
Or5m3b	0.0309774	-1.05683	0.118	0.185	1	6
Ehd4	0.000420793	-1.05557	0.465	0.545	1	6
Zgrf1	0.241025	-1.05552	0.031	0.053	1	6
Cnn3	0.394903	-1.05408	0.024	0.037	1	6
Cyp11a1	0.192612	-1.05334	0.004	0.016	1	6
Serpinb6b	0.264989	-1.05096	0.059	0.085	1	6
Spa17	0.776727	-1.05076	0.031	0.026	1	6
Clec16a	0.122759	-1.05009	0.217	0.259	1	6
Dhrs9	0.400994	-1.0492	0.004	0.011	1	6
Klhl17	0.577336	-1.04917	0.024	0.016	1	6
Nsl1	0.654262	-1.047	0.016	0.011	1	6
Mettl2	0.259393	-1.04651	0.091	0.116	1	6
Glis2	0.619044	-1.04426	0.02	0.026	1	6
Siah1b	0.259619	-1.04292	0.02	0.037	1	6
Xdh	0.0425901	-1.04282	0.059	0.111	1	6
Mcm5	0.479881	-1.0416	0.059	0.042	1	6
Pgrmc2	0.605627	-1.0415	0.232	0.228	1	6
Ebf1	0.0223798	-1.04144	0.024	0.069	1	6
Depdc5	0.286226	-1.04144	0.165	0.19	1	6
Ephx2	0.429883	-1.04092	0.008	0.016	1	6
Fgd1	0.231155	-1.0409	0.008	0.021	1	6
Smpd2	0.464754	-1.04026	0.039	0.053	1	6
Upp2	0.232619	-1.03873	0.008	0.021	1	6
Hoxa9	0.727525	-1.03856	0.031	0.037	1	6
Osbpl5	0.66675	-1.03821	0.035	0.042	1	6
Ceacam16	0.560843	-1.03776	0.122	0.132	1	6
Stk11ip	0.525948	-1.03677	0.075	0.09	1	6
Ercc2	0.269837	-1.03642	0.055	0.079	1	6
Enpp5	0.314606	-1.03443	0.063	0.085	1	6
Tmem63b	0.161233	-1.03413	0.091	0.127	1	6
Tns4	0.890107	-1.03348	0.02	0.021	1	6
Pramel13	0.400994	-1.03279	0.004	0.011	1	6
Or2m12	0.00604442	-1.03274	0.197	0.296	1	6
Anks1b	0.403669	-1.03188	0.02	0.032	1	6
Dtx3l	0.0624129	-1.03139	0.209	0.259	1	6
Vwa7	0.400994	-1.02945	0.004	0.011	1	6
Xk	0.760715	-1.02883	0.008	0.011	1	6
H2-D1	1.67932e-37	-1.02687	0.969	0.974	2.77927e-33	6
Ly6c1	0.760715	-1.02597	0.008	0.011	1	6
Ogg1	0.245765	-1.02516	0.035	0.058	1	6
Rps6kc1	0.354792	-1.02434	0.083	0.106	1	6
Nfxl1	0.28051	-1.02394	0.071	0.095	1	6
Ccdc126	0.0639247	-1.02359	0.051	0.095	1	6
Wdr90	0.423802	-1.02288	0.016	0.026	1	6
Lilrb4b	0.495819	-1.02143	0.035	0.048	1	6
Cenpo	0.580869	-1.02108	0.063	0.074	1	6
Arf2	0.617552	-1.01874	0.154	0.164	1	6
Kcnb1	0.124274	-1.01826	0.008	0.026	1	6
Dis3l	0.604049	-1.01707	0.059	0.069	1	6
Cwf19l1	0.41559	-1.01638	0.071	0.09	1	6
Rnf168	0.548636	-1.01554	0.157	0.169	1	6
Prelid2	0.215456	-1.01265	0.047	0.074	1	6
Mitf	0.0134804	-1.01265	0.197	0.28	1	6
Mpz	0.400994	-1.01185	0.004	0.011	1	6
Zfp942	0.0597828	-1.01145	0.177	0.243	1	6
Csf3r	0.257337	-1.01127	0.024	0.042	1	6
Mfsd4b4	0.659374	-1.01109	0.016	0.021	1	6
Usp49	0.984757	-1.01058	0.016	0.016	1	6
Iqsec1	7.7502e-05	-1.00833	0.28	0.407	1	6
Clnk	0.246247	-1.00792	0.063	0.09	1	6
Irak3	0.420252	-1.00754	0.016	0.026	1	6
Art2b	0.706439	-1.0074	0.012	0.016	1	6
Ptpn14	0.192612	-1.00686	0.004	0.016	1	6
Cfap53	0.411703	-1.00667	0.028	0.016	1	6
Disp1	0.0529671	-1.00627	0.197	0.254	1	6
Neil2	0.764206	-1.00616	0.008	0.011	1	6
Trim45	0.377429	-1.00591	0.031	0.048	1	6
Plaur	5.66067e-09	-1.00576	0.598	0.767	9.3684e-05	6
Rasip1	0.818365	-1.00526	0.024	0.026	1	6
Lin9	0.976265	-1.00521	0.067	0.063	1	6
Aasdh	0.438543	-1.00449	0.067	0.085	1	6
Nrg1	0.660073	-1.00231	0.028	0.021	1	6
Kcnc1	0.191053	-1.00061	0.004	0.016	1	6
Fstl4	0.400994	-1.00058	0.004	0.011	1	6
Mcub	0.394903	-0.999924	0.024	0.037	1	6
Tfdp2	0.321617	-0.999544	0.118	0.143	1	6
Dynlt1a	0.146952	-0.999458	0.047	0.079	1	6
Abhd13	0.195957	-0.999011	0.059	0.09	1	6
Adipor2	8.33636e-10	-0.998224	0.638	0.788	1.37967e-05	6
Mylpf	0.583483	-0.99686	0.024	0.032	1	6
Dlgap5	0.436515	-0.996449	0.012	0.021	1	6
Mypop	0.674247	-0.996025	0.028	0.021	1	6
Dus4l	0.37106	-0.994801	0.075	0.095	1	6
Tspan2	0.00371275	-0.993709	0.165	0.275	1	6
Txlnb	0.00801596	-0.99239	0.008	0.048	1	6
Pax5	0.425965	-0.992022	0.02	0.032	1	6
Usp1	0.0408891	-0.989982	0.185	0.243	1	6
Ltb	5.66646e-07	-0.989276	0.354	0.561	0.00937799	6
Ap4e1	0.146688	-0.988035	0.106	0.148	1	6
Crat	0.740148	-0.987452	0.031	0.037	1	6
Ccrl2	0.411551	-0.986914	0.02	0.032	1	6
Ppip5k2	0.0456055	-0.986678	0.291	0.349	1	6
Platr25	0.60271	-0.985752	0.122	0.132	1	6
Ccr4	0.192612	-0.984756	0.004	0.016	1	6
H1f3	0.0039943	-0.983826	0.047	0.122	1	6
Catspere2	0.679917	-0.982642	0.035	0.042	1	6
Evpl	0.235565	-0.982329	0.008	0.021	1	6
Zkscan5	0.640477	-0.981865	0.047	0.037	1	6
Mars2	0.502503	-0.981531	0.051	0.037	1	6
Lrrc42	0.0639153	-0.981241	0.059	0.106	1	6
Tmtc4	0.425583	-0.981131	0.016	0.026	1	6
Wdpcp	0.206437	-0.98091	0.094	0.127	1	6
Fam110b	0.537702	-0.98066	0.031	0.042	1	6
Gm44503	0.703655	-0.980087	0.012	0.016	1	6
Kif22	0.709226	-0.979875	0.012	0.016	1	6
Rundc3a	0.398038	-0.979671	0.004	0.011	1	6
Zfhx2	0.266102	-0.979601	0.091	0.116	1	6
Ano10	0.112045	-0.978077	0.094	0.138	1	6
Stk32c	0.255575	-0.976941	0.012	0.026	1	6
Rnasek	0.320507	-0.976756	0.039	0.058	1	6
Rab19	0.918523	-0.976382	0.063	0.063	1	6
Slc22a14	0.237048	-0.976203	0.008	0.021	1	6
Dhodh	0.0591983	-0.975429	0.063	0.111	1	6
Bid	0.280073	-0.974701	0.169	0.196	1	6
Ogfr	0.00175258	-0.974574	0.224	0.328	1	6
Tbc1d2	0.540025	-0.972258	0.028	0.037	1	6
Smagp	0.760715	-0.971275	0.008	0.011	1	6
Cops7a	0.0489821	-0.971226	0.169	0.228	1	6
Izumo4	0.0122662	-0.96975	0.181	0.265	1	6
Chst14	0.915091	-0.969438	0.012	0.011	1	6
Zbtb12	0.625226	-0.969378	0.02	0.026	1	6
Pcid2	0.214578	-0.968118	0.15	0.18	1	6
Gbp7	0.142013	-0.966781	0.051	0.085	1	6
Prrc1	0.0496098	-0.966652	0.169	0.228	1	6
Usp21	0.400578	-0.966586	0.055	0.074	1	6
Adar	0.169849	-0.966197	0.252	0.275	1	6
Tacc3	0.544948	-0.965862	0.028	0.037	1	6
Hs3st3a1	0.866662	-0.965794	0.047	0.042	1	6
Vps53	0.107542	-0.964573	0.256	0.286	1	6
Rbl1	0.816089	-0.964077	0.106	0.095	1	6
Apobr	0.243676	-0.96403	0.031	0.053	1	6
Tbc1d13	0.558745	-0.963911	0.13	0.143	1	6
Cited4	0.152839	-0.963523	0.039	0.069	1	6
Kntc1	0.400994	-0.962373	0.004	0.011	1	6
Nomo1	0.0160705	-0.960349	0.11	0.185	1	6
Angpt4	0.0186598	-0.960286	0.024	0.069	1	6
Nat8f1	0.500266	-0.959599	0.055	0.069	1	6
Pom121	0.0260899	-0.958972	0.213	0.275	1	6
Reep3	0.00222221	-0.958361	0.311	0.407	1	6
Tap1	4.42474e-06	-0.957967	0.335	0.513	0.0732294	6
Ttc23	0.43243	-0.957824	0.012	0.021	1	6
Abca6	0.482778	-0.957296	0.039	0.053	1	6
Ess2	0.445685	-0.956859	0.063	0.079	1	6
Camk2b	0.00447039	-0.956767	0.185	0.28	1	6
Khdrbs3	0.235565	-0.956765	0.008	0.021	1	6
Cep164	0.0246424	-0.955922	0.283	0.344	1	6
Sema5a	0.519574	-0.955187	0.087	0.101	1	6
Atg4c	0.144288	-0.955104	0.094	0.132	1	6
Ciita	0.000894623	-0.954071	0.382	0.476	1	6
Gapdhs	0.423802	-0.952952	0.016	0.026	1	6
Ifi208	0.587152	-0.952558	0.024	0.032	1	6
Tctn1	0.442654	-0.952274	0.063	0.079	1	6
Zfp790	0.727979	-0.950336	0.047	0.053	1	6
Spc24	0.15885	-0.950126	0.02	0.042	1	6
Uspl1	0.000268788	-0.949909	0.268	0.392	1	6
Tle2	0.491665	-0.949907	0.035	0.048	1	6
Fbxo5	0.390639	-0.949737	0.024	0.037	1	6
9930104L06Rik	0.0964126	-0.949451	0.047	0.085	1	6
Asph	4.3216e-06	-0.948975	0.413	0.561	0.0715225	6
Pced1a	0.923814	-0.948829	0.051	0.053	1	6
Zfp275	0.210047	-0.9486	0.047	0.074	1	6
Tmem163	9.05627e-16	-0.947724	0.839	0.974	1.49881e-11	6
Gm614	0.827029	-0.94763	0.024	0.026	1	6
Espl1	0.770944	-0.946073	0.02	0.016	1	6
Gucd1	0.409941	-0.945866	0.098	0.116	1	6
Ndst2	0.653284	-0.943863	0.059	0.069	1	6
Copz2	0.581652	-0.943351	0.024	0.032	1	6
Phka1	0.827105	-0.942225	0.11	0.111	1	6
Tmem241	0.189408	-0.941842	0.146	0.18	1	6
Parn	0.150922	-0.941536	0.264	0.296	1	6
Atxn1l	0.848245	-0.940724	0.102	0.09	1	6
Scn1b	0.43469	-0.939976	0.008	0.016	1	6
Trdmt1	0.365365	-0.939939	0.031	0.048	1	6
Flvcr1	0.188648	-0.938589	0.11	0.148	1	6
Ifi35	0.00785879	-0.937699	0.252	0.333	1	6
Pard3b	0.670063	-0.937237	0.071	0.079	1	6
Eps8	0.436515	-0.936995	0.012	0.021	1	6
H2ac7	0.192612	-0.936381	0.004	0.016	1	6
Map3k7	0.0215998	-0.936249	0.24	0.312	1	6
Ccp110	0.614937	-0.936188	0.02	0.026	1	6
Cntrob	0.191897	-0.93607	0.098	0.132	1	6
Rsph3a	0.34648	-0.935939	0.059	0.079	1	6
Fhip2b	0.562923	-0.935768	0.154	0.164	1	6
Klc1	0.127174	-0.934581	0.295	0.323	1	6
Zfp770	0.103942	-0.934158	0.024	0.053	1	6
Spag5	0.400994	-0.933878	0.004	0.011	1	6
Xpa	6.48913e-05	-0.932969	0.315	0.45	1	6
Iffo2	0.240983	-0.930927	0.244	0.28	1	6
AI987944	0.249037	-0.930257	0.13	0.159	1	6
Mrgpre	0.706439	-0.929931	0.012	0.016	1	6
Zfp180	0.955356	-0.928978	0.106	0.101	1	6
Rap1gap2	0.0234525	-0.928831	0.358	0.423	1	6
Slfn8	0.0175006	-0.928802	0.24	0.323	1	6
Aurkb	0.915091	-0.928472	0.012	0.011	1	6
Slc25a10	0.66839	-0.927061	0.035	0.042	1	6
Dnaaf9	0.22079	-0.926148	0.217	0.249	1	6
Zfp639	0.807315	-0.925957	0.173	0.169	1	6
Rtl8b	0.0406866	-0.9258	0.059	0.111	1	6
Parp16	0.429883	-0.924333	0.008	0.016	1	6
Pkib	7.28144e-05	-0.923995	0.567	0.646	1	6
Tigar	0.159099	-0.923888	0.039	0.069	1	6
Degs2	0.767701	-0.922835	0.008	0.011	1	6
Itpr3	0.109926	-0.922736	0.205	0.254	1	6
Bivm	0.394903	-0.922448	0.024	0.037	1	6
Clec2l	0.43447	-0.922372	0.012	0.021	1	6
Gen1	0.581652	-0.921394	0.024	0.032	1	6
4930558K02Rik	0.764206	-0.921243	0.008	0.011	1	6
H2-T24	0.0545964	-0.921108	0.15	0.212	1	6
Ankrd26	0.877042	-0.920891	0.063	0.058	1	6
Krt222	0.651559	-0.919353	0.016	0.011	1	6
Gpatch2	0.0136747	-0.918485	0.232	0.317	1	6
Slc25a45	0.13013	-0.917362	0.13	0.175	1	6
Cenpp	0.422324	-0.916962	0.047	0.063	1	6
Ptpn5	0.400994	-0.916336	0.004	0.011	1	6
Pafah2	0.639753	-0.916149	0.02	0.026	1	6
Slc37a4	0.381905	-0.914701	0.055	0.074	1	6
Gm20498	0.976445	-0.913943	0.016	0.016	1	6
Gtpbp3	0.298943	-0.91241	0.051	0.074	1	6
Csrp2	0.614937	-0.911022	0.02	0.026	1	6
Ctxn1	0.400994	-0.910958	0.004	0.011	1	6
Enpp4	0.190343	-0.910592	0.181	0.217	1	6
Atp13a3	1.21193e-05	-0.910383	0.52	0.667	0.200574	6
Vamp5	0.569031	-0.909402	0.102	0.116	1	6
Gm49527	0.192612	-0.909378	0.004	0.016	1	6
Gstcd	0.0723015	-0.909229	0.169	0.222	1	6
Zc3h6	0.129268	-0.909221	0.15	0.19	1	6
Ddc	0.770944	-0.907957	0.02	0.016	1	6
Zdhhc5	0.00442647	-0.907305	0.185	0.275	1	6
Pou5f1	0.229014	-0.907032	0.039	0.063	1	6
Gas2	0.257799	-0.907011	0.028	0.048	1	6
Slc9a6	0.0354526	-0.90609	0.067	0.122	1	6
Glb1l	0.249039	-0.905829	0.031	0.053	1	6
Ulbp1	0.109563	-0.904928	0.028	0.058	1	6
Alg1	0.689535	-0.904524	0.11	0.116	1	6
Helz2	0.0170724	-0.903718	0.118	0.196	1	6
Zfp934	0.390196	-0.903404	0.051	0.069	1	6
Tlr12	0.0129331	-0.903084	0.173	0.254	1	6
Wdr38	0.892534	-0.902115	0.02	0.021	1	6
Akap1	0.594521	-0.901224	0.024	0.032	1	6
Tmem119	0.764206	-0.900813	0.008	0.011	1	6
Hexdc	0.590595	-0.899931	0.043	0.053	1	6
Asap2	0.63351	-0.899678	0.02	0.026	1	6
Rusc1	0.156787	-0.899067	0.11	0.148	1	6
Ercc3	0.617843	-0.898534	0.11	0.122	1	6
Parp11	0.0580934	-0.898298	0.185	0.243	1	6
Tmem240	0.427369	-0.898172	0.016	0.026	1	6
Ranbp3	0.991288	-0.89702	0.256	0.233	1	6
Nap1l3	0.727525	-0.896594	0.031	0.037	1	6
Lsr	0.767701	-0.895759	0.008	0.011	1	6
Zdhhc19	1.72213e-06	-0.894951	0.409	0.603	0.0285013	6
Diras2	0.625226	-0.894424	0.02	0.026	1	6
Ccnj	0.428591	-0.894392	0.083	0.101	1	6
Zbtb48	0.517433	-0.894332	0.051	0.063	1	6
Pcbp3	0.239078	-0.894058	0.043	0.069	1	6
Rnf220	9.52256e-07	-0.893753	0.772	0.841	0.0157598	6
Mfsd4a	0.0874992	-0.893485	0.091	0.138	1	6
Rab4a	0.969139	-0.893121	0.028	0.026	1	6
Xrcc3	0.760715	-0.89264	0.008	0.011	1	6
Kctd3	0.47412	-0.892525	0.059	0.074	1	6
Icosl	0.595327	-0.892131	0.13	0.138	1	6
Cd2bp2	0.0412506	-0.891711	0.209	0.275	1	6
Zfp60	0.837221	-0.891608	0.055	0.058	1	6
Sh2d6	0.661731	-0.891492	0.016	0.021	1	6
Gadd45g	0.204405	-0.891433	0.11	0.148	1	6
Mtx3	0.469865	-0.890352	0.039	0.053	1	6
Hdac10	0.334112	-0.889722	0.094	0.116	1	6
H2ac15	0.429883	-0.889361	0.008	0.016	1	6
Pdgfb	0.760715	-0.887607	0.008	0.011	1	6
Gorasp1	0.432282	-0.885904	0.008	0.016	1	6
Cntnap1	0.432282	-0.885004	0.008	0.016	1	6
AW146154	0.393941	-0.884267	0.028	0.042	1	6
Ttc39a	0.100531	-0.88419	0.024	0.053	1	6
Pdp1	0.232305	-0.883751	0.079	0.048	1	6
Armc10	0.0293884	-0.882635	0.154	0.228	1	6
Arap3	0.65467	-0.882506	0.016	0.021	1	6
Plekhm1	0.304794	-0.88172	0.091	0.116	1	6
Chmp7	0.343109	-0.879261	0.091	0.063	1	6
Kctd9	0.207511	-0.879054	0.051	0.079	1	6
Nsd2	0.0932994	-0.878988	0.24	0.286	1	6
Fbxl8	0.658051	-0.878032	0.083	0.09	1	6
Tbx21	0.772796	-0.877744	0.031	0.026	1	6
Kansl2	0.00395381	-0.877607	0.201	0.302	1	6
Dtwd1	0.795118	-0.877128	0.043	0.048	1	6
Bcl2a1a	0.429159	-0.876421	0.016	0.026	1	6
Dnmbp	0.415554	-0.876317	0.157	0.175	1	6
Atg9a	0.426762	-0.875609	0.047	0.063	1	6
Map3k12	0.623162	-0.875385	0.02	0.026	1	6
Hcar2	0.403962	-0.875236	0.004	0.011	1	6
Utp14a	0.0712342	-0.874465	0.295	0.339	1	6
Fubp3	0.0736654	-0.874041	0.122	0.175	1	6
Zfp553	0.112135	-0.873209	0.043	0.079	1	6
Accs	0.166746	-0.873168	0.039	0.069	1	6
Traf3ip1	0.524006	-0.873005	0.031	0.042	1	6
H4c2	0.400994	-0.87284	0.004	0.011	1	6
Abcc10	0.643539	-0.871579	0.039	0.048	1	6
Ifitm2	0.988062	-0.870476	0.043	0.042	1	6
Trmt10b	0.423431	-0.86997	0.047	0.063	1	6
Arhgap22	0.425583	-0.869787	0.016	0.026	1	6
Cd59b	0.237048	-0.869779	0.008	0.021	1	6
Pctp	0.343696	-0.869029	0.035	0.053	1	6
Babam1	0.000209703	-0.868307	0.303	0.439	1	6
Pygm	0.429159	-0.867835	0.016	0.026	1	6
Crocc	0.899821	-0.867463	0.02	0.021	1	6
Dhx58	0.430397	-0.86701	0.012	0.021	1	6
Arv1	0.733967	-0.866738	0.13	0.132	1	6
Fabp12	0.904684	-0.866597	0.02	0.021	1	6
Gstk1	0.270179	-0.866118	0.063	0.09	1	6
Eng	0.971772	-0.865929	0.055	0.053	1	6
Rasa4	0.690484	-0.864271	0.122	0.127	1	6
Ankrd55	0.103547	-0.863544	0.031	0.063	1	6
Zfp946	0.277589	-0.863512	0.051	0.074	1	6
Ndc80	0.897493	-0.863165	0.035	0.037	1	6
Palld	0.712248	-0.862205	0.051	0.042	1	6
Ezh1	0.0412006	-0.861889	0.213	0.27	1	6
Npas2	0.43447	-0.861837	0.012	0.021	1	6
Slfn3	0.760715	-0.861502	0.008	0.011	1	6
Spag6l	0.0729765	-0.861375	0.047	0.09	1	6
Lrrn3	0.659374	-0.861331	0.016	0.021	1	6
Zfp661	0.432282	-0.861021	0.008	0.016	1	6
Zfp85	0.529775	-0.859648	0.031	0.021	1	6
Nt5c3	0.374648	-0.859107	0.217	0.228	1	6
Gnaz	0.400994	-0.859094	0.004	0.011	1	6
Baiap2l2	0.403962	-0.858605	0.004	0.011	1	6
Cd200r4	0.0971084	-0.85835	0.035	0.011	1	6
Ryr1	0.428955	-0.85825	0.102	0.122	1	6
Ripor3	0.192612	-0.857712	0.004	0.016	1	6
Bfsp2	0.197852	-0.857092	0.055	0.085	1	6
Gm17571	0.400994	-0.856751	0.004	0.011	1	6
Inf2	0.0224333	-0.856676	0.24	0.312	1	6
Azin2	0.250175	-0.855608	0.012	0.026	1	6
Proca1	0.976445	-0.854944	0.016	0.016	1	6
Tubb4a	0.709226	-0.854708	0.012	0.016	1	6
Wdr11	0.166051	-0.854361	0.13	0.169	1	6
D130040H23Rik	0.0131114	-0.853104	0.087	0.164	1	6
Adam23	0.695701	-0.852646	0.039	0.032	1	6
Vasn	0.764206	-0.852121	0.008	0.011	1	6
Dnah17	0.760715	-0.851772	0.008	0.011	1	6
Eid2b	0.0750759	-0.851496	0.031	0.069	1	6
Asb8	0.141308	-0.850918	0.122	0.164	1	6
Hmgb3	0.657021	-0.850535	0.016	0.021	1	6
Brf2	0.554026	-0.85038	0.075	0.058	1	6
Ceacam1	0.25395	-0.849878	0.224	0.249	1	6
Wdr46	0.304859	-0.849436	0.114	0.143	1	6
Slc7a7	0.246136	-0.849434	0.067	0.095	1	6
BC034090	0.764206	-0.848373	0.008	0.011	1	6
Mtmr10	0.637672	-0.84835	0.102	0.111	1	6
Inpp5e	0.372235	-0.847552	0.063	0.042	1	6
Tmem62	0.870516	-0.845931	0.075	0.069	1	6
Loxl3	0.760715	-0.845557	0.008	0.011	1	6
Oaf	0.661731	-0.845366	0.016	0.021	1	6
Trim12c	0.0305734	-0.845351	0.311	0.365	1	6
Rhot2	0.816889	-0.844187	0.071	0.074	1	6
Tamm41	0.323383	-0.843584	0.043	0.063	1	6
Atp11a	0.190097	-0.843178	0.083	0.116	1	6
Ccne2	0.403962	-0.842732	0.004	0.011	1	6
Rfesd	0.549949	-0.842379	0.122	0.132	1	6
Wrap53	0.260525	-0.842218	0.079	0.106	1	6
Gtf2h2	0.0665995	-0.842111	0.094	0.148	1	6
Map3k8	3.47865e-05	-0.841809	0.461	0.603	0.575716	6
Kit	0.149072	-0.841602	0.091	0.132	1	6
Cox6b2	0.65467	-0.841352	0.016	0.021	1	6
Iba57	0.239199	-0.841266	0.039	0.063	1	6
Wdr7	0.0554464	-0.84107	0.252	0.312	1	6
Ap3m2	0.424631	-0.840845	0.232	0.238	1	6
Cfap418	0.752068	-0.84079	0.079	0.085	1	6
Myo19	0.897391	-0.840456	0.02	0.021	1	6
Rhbdd2	0.0326002	-0.83865	0.091	0.037	1	6
Praf2	0.247466	-0.837519	0.035	0.058	1	6
Marveld2	0.414729	-0.836131	0.02	0.032	1	6
Cog2	0.187218	-0.836069	0.138	0.175	1	6
H2bc18	0.408387	-0.835277	0.02	0.032	1	6
Pias3	0.396559	-0.835262	0.071	0.09	1	6
Ptger1	0.712018	-0.834911	0.012	0.016	1	6
Trim7	0.282569	-0.83393	0.094	0.122	1	6
Guca1b	0.775924	-0.833145	0.02	0.016	1	6
Mboat2	0.764206	-0.832454	0.008	0.011	1	6
Large2	0.432282	-0.832399	0.008	0.016	1	6
Sh3bp5l	0.78548	-0.831811	0.043	0.048	1	6
LTO1	0.297194	-0.831686	0.173	0.196	1	6
Erp27	0.659374	-0.830454	0.016	0.021	1	6
Rwdd3	0.892534	-0.829958	0.02	0.021	1	6
Aifm2	0.403962	-0.829724	0.004	0.011	1	6
Disc1	0.23989	-0.828095	0.24	0.259	1	6
Pik3c2b	0.432282	-0.827334	0.008	0.016	1	6
Ccdc146	0.429883	-0.82702	0.008	0.016	1	6
Tc2n	0.403962	-0.826968	0.004	0.011	1	6
Dpcd	0.11213	-0.826147	0.13	0.175	1	6
Tcf7l2	2.33199e-05	-0.825898	0.689	0.762	0.385944	6
H4c3	0.124598	-0.825629	0.075	0.116	1	6
Ankrd39	0.994383	-0.825275	0.134	0.127	1	6
Gpr85	0.76789	-0.824086	0.028	0.032	1	6
Zfp14	0.255851	-0.824069	0.028	0.048	1	6
Ap3s2	0.038364	-0.82342	0.201	0.265	1	6
Dmrt1	0.585754	-0.823099	0.024	0.016	1	6
Dstyk	0.421277	-0.823056	0.126	0.148	1	6
Rigi	0.223757	-0.822904	0.047	0.074	1	6
Bms1	0.177198	-0.822472	0.232	0.265	1	6
Slc25a13	0.0737384	-0.822245	0.051	0.095	1	6
Clec9a	0.0012039	-0.822195	0.315	0.439	1	6
Fam184a	0.617751	-0.82198	0.079	0.063	1	6
Nudt5	0.130704	-0.82151	0.177	0.222	1	6
Glipr1	0.000563024	-0.821377	0.5	0.608	1	6
Mks1	0.468584	-0.821306	0.039	0.053	1	6
Senp8	0.327223	-0.82115	0.043	0.063	1	6
Setd4	0.207629	-0.820843	0.122	0.159	1	6
Prdx4	0.340842	-0.820495	0.205	0.222	1	6
Ccdc18	0.709226	-0.820271	0.012	0.016	1	6
Tank	0.00175587	-0.820124	0.378	0.46	1	6
Wdr73	0.303025	-0.819456	0.114	0.143	1	6
Gpt	0.238404	-0.818658	0.039	0.063	1	6
Dhrs1	0.166593	-0.817866	0.075	0.111	1	6
Diaph3	0.259215	-0.817685	0.059	0.085	1	6
Dexi	0.533598	-0.817523	0.161	0.169	1	6
Adck2	0.645072	-0.817164	0.039	0.048	1	6
Chpf	0.666455	-0.817163	0.016	0.021	1	6
Dsel	0.528551	-0.817045	0.031	0.042	1	6
Actr8	0.237561	-0.817037	0.126	0.159	1	6
Usp10	0.381496	-0.816893	0.15	0.169	1	6
Jmjd8	0.248338	-0.816308	0.063	0.037	1	6
Egln3	0.306082	-0.815374	0.075	0.101	1	6
Llgl2	0.592675	-0.814159	0.024	0.032	1	6
Med20	0.143459	-0.814137	0.13	0.169	1	6
Cpne2	0.00250092	-0.813779	0.303	0.407	1	6
Zfp599	0.0673999	-0.812318	0.094	0.148	1	6
Gm42669	0.156117	-0.812092	0.016	0.037	1	6
Gas8	0.474213	-0.811998	0.087	0.101	1	6
Mdm1	0.671676	-0.811993	0.035	0.042	1	6
Manbal	0.0365165	-0.811882	0.244	0.302	1	6
Mtm1	0.00701831	-0.811632	0.295	0.397	1	6
Plin2	0.200765	-0.811159	0.126	0.159	1	6
Dscam	0.00476287	-0.810687	0.051	0.127	1	6
Arg2	0.440621	-0.809548	0.012	0.021	1	6
Cd163	0.345299	-0.809384	0.063	0.085	1	6
Gm1043	0.164364	-0.809291	0.039	0.069	1	6
Rcan1	0.284365	-0.808925	0.059	0.085	1	6
Wdr53	0.266067	-0.808847	0.106	0.132	1	6
Brca2	0.384708	-0.808768	0.028	0.042	1	6
Chrnb1	0.621532	-0.808701	0.059	0.069	1	6
Sass6	0.358043	-0.807938	0.035	0.053	1	6
Zranb3	0.709213	-0.806574	0.051	0.042	1	6
Blvra	0.2898	-0.805622	0.114	0.143	1	6
Zfp961	0.921224	-0.805467	0.075	0.074	1	6
Lrrcc1	0.342929	-0.805415	0.106	0.132	1	6
Mthfsl	0.058357	-0.805366	0.15	0.206	1	6
Fbxo4	0.54379	-0.804479	0.146	0.164	1	6
H3c4	0.637836	-0.804134	0.043	0.053	1	6
Daxx	0.293589	-0.804118	0.118	0.148	1	6
Sipa1l3	0.504929	-0.803902	0.189	0.201	1	6
4930522L14Rik	0.599064	-0.803389	0.165	0.138	1	6
Fzd7	0.844418	-0.80301	0.024	0.026	1	6
Ift122	0.142403	-0.80175	0.059	0.095	1	6
Atf7	0.457674	-0.801609	0.189	0.206	1	6
Arhgap1	0.157007	-0.801572	0.157	0.196	1	6
Mrps27	0.0719564	-0.800453	0.091	0.143	1	6
Abtb1	0.217359	-0.800374	0.075	0.106	1	6
Themis2	0.103563	-0.8	0.26	0.302	1	6
Hunk	0.764206	-0.8	0.008	0.011	1	6
Elac1	0.688604	-0.79971	0.098	0.106	1	6
Fam114a1	0.577396	-0.79948	0.047	0.058	1	6
Pak6	0.725727	-0.798894	0.031	0.037	1	6
Morn2	0.214609	-0.797953	0.079	0.111	1	6
Frmd4a	0.00269854	-0.797695	0.35	0.45	1	6
Pak4	0.934225	-0.797419	0.047	0.048	1	6
Unc119	0.254566	-0.795539	0.201	0.228	1	6
Syne3	0.258542	-0.795201	0.063	0.09	1	6
Slc25a14	0.708448	-0.794889	0.051	0.058	1	6
Ocrl	0.507146	-0.794274	0.059	0.074	1	6
9130019O22Rik	0.43469	-0.79317	0.008	0.016	1	6
Mier2	0.799998	-0.791846	0.043	0.037	1	6
Gtf2h3	0.154014	-0.791796	0.075	0.111	1	6
H2-T10	0.50257	-0.791434	0.055	0.069	1	6
Poglut2	0.505585	-0.791056	0.035	0.048	1	6
Fam221b	0.430953	-0.790931	0.016	0.026	1	6
Sag	0.625226	-0.790797	0.02	0.026	1	6
Carm1	0.450033	-0.78989	0.138	0.153	1	6
Icam2	0.185297	-0.789611	0.067	0.101	1	6
Bub1b	0.700727	-0.789387	0.031	0.037	1	6
Nkiras2	0.242242	-0.789035	0.138	0.169	1	6
Patj	0.804	-0.788596	0.067	0.058	1	6
Ccdc85c	0.760715	-0.788514	0.008	0.011	1	6
Zfp53	0.0449161	-0.788056	0.157	0.222	1	6
Mettl18	0.993132	-0.788007	0.055	0.053	1	6
Galc	0.941146	-0.78692	0.063	0.063	1	6
Psd2	0.712018	-0.786891	0.012	0.016	1	6
Wipi1	0.714813	-0.785602	0.012	0.016	1	6
Tmem138	0.141982	-0.785411	0.122	0.164	1	6
Pomgnt2	0.479228	-0.785195	0.012	0.005	1	6
Thsd7b	0.764206	-0.784896	0.008	0.011	1	6
Fam122b	0.685812	-0.78479	0.051	0.058	1	6
Rcor3	0.0378742	-0.783895	0.142	0.212	1	6
Stard8	0.505585	-0.783728	0.035	0.048	1	6
Ttc9	0.432282	-0.783685	0.008	0.016	1	6
Nfam1	0.0173412	-0.78309	0.323	0.407	1	6
Rwdd2a	0.713188	-0.783053	0.031	0.037	1	6
Mrpl16	0.409012	-0.78289	0.228	0.238	1	6
Glt8d2	0.764206	-0.78285	0.008	0.011	1	6
Amigo1	0.709226	-0.782294	0.012	0.016	1	6
Mtfp1	0.403962	-0.781875	0.004	0.011	1	6
Cep152	0.697054	-0.781613	0.098	0.106	1	6
Tmem260	0.0754609	-0.781043	0.256	0.291	1	6
Med31	0.048405	-0.780531	0.217	0.275	1	6
Vps50	0.00348589	-0.78028	0.228	0.339	1	6
Mtus1	0.403962	-0.780178	0.004	0.011	1	6
Slc28a2	0.96404	-0.78017	0.102	0.101	1	6
Gna12	0.0201697	-0.779883	0.26	0.333	1	6
Zbtb45	0.856059	-0.779767	0.071	0.074	1	6
Trmt61a	0.655114	-0.779035	0.055	0.063	1	6
Agbl4	0.760715	-0.778725	0.008	0.011	1	6
Gatad1	0.000423848	-0.778644	0.409	0.524	1	6
Rab20	0.855588	-0.778572	0.035	0.032	1	6
Cc2d2b	0.824214	-0.77841	0.043	0.048	1	6
Cbx7	0.0796859	-0.778377	0.134	0.185	1	6
Creb3l2	0.0915838	-0.778132	0.358	0.386	1	6
Shisa5	1.46355e-05	-0.778113	0.421	0.614	0.242217	6
Pou3f1	0.767701	-0.778056	0.008	0.011	1	6
Agl	0.760988	-0.777635	0.118	0.122	1	6
Cd96	0.32106	-0.777324	0.142	0.169	1	6
G6pc3	0.365129	-0.776693	0.122	0.143	1	6
Thyn1	0.244878	-0.776343	0.181	0.212	1	6
Zmym3	0.167481	-0.77591	0.071	0.106	1	6
Txndc5	5.59406e-06	-0.775594	0.61	0.735	0.0925816	6
Crtac1	0.403962	-0.775081	0.004	0.011	1	6
Ccdc138	0.878466	-0.775053	0.055	0.058	1	6
Naglu	0.530729	-0.775041	0.11	0.127	1	6
Ryk	0.720415	-0.774024	0.012	0.016	1	6
1700029H14Rik	0.905338	-0.7739	0.012	0.011	1	6
Clec11a	0.794918	-0.772837	0.043	0.037	1	6
Zfp764	0.89015	-0.772095	0.035	0.037	1	6
Agap2	0.350766	-0.771764	0.118	0.143	1	6
Cmklr1	0.388649	-0.771283	0.028	0.042	1	6
Tomm70a	0.00120208	-0.770713	0.299	0.418	1	6
Mmp25	0.427369	-0.770704	0.016	0.026	1	6
2310009B15Rik	0.12439	-0.770667	0.169	0.212	1	6
Crybg2	0.915091	-0.770161	0.012	0.011	1	6
Uqcc1	0.234834	-0.769886	0.165	0.196	1	6
Smpd5	0.403514	-0.769063	0.024	0.037	1	6
Smox	0.295285	-0.768546	0.118	0.143	1	6
Rpl9-ps6	0.0187125	-0.768217	0.122	0.196	1	6
Ascl4	0.666455	-0.767698	0.016	0.021	1	6
Klhl22	0.254097	-0.766985	0.083	0.111	1	6
Rfxank	0.0561225	-0.765917	0.087	0.138	1	6
Gimap9	0.0538313	-0.765725	0.181	0.249	1	6
Reck	0.882817	-0.765325	0.035	0.037	1	6
Ciz1	0.909559	-0.763634	0.181	0.169	1	6
Eefsec	0.735265	-0.76341	0.268	0.259	1	6
Mxd4	0.00959048	-0.76337	0.457	0.513	1	6
Acot11	0.452802	-0.763091	0.063	0.079	1	6
Pgm2	0.678798	-0.762725	0.114	0.095	1	6
Fbxl2	0.395577	-0.76195	0.102	0.122	1	6
Scart2	0.2554	-0.761746	0.031	0.053	1	6
Pcmtd2	0.0443663	-0.761547	0.205	0.27	1	6
Tlnrd1	0.577191	-0.761278	0.079	0.09	1	6
Ap4b1	0.882817	-0.760894	0.035	0.037	1	6
Fndc9	0.809106	-0.760097	0.071	0.074	1	6
Gopc	0.44975	-0.759273	0.177	0.19	1	6
Tsr1	0.339633	-0.759203	0.114	0.138	1	6
Sec14l1	0.226419	-0.758649	0.091	0.122	1	6
Vps39	0.17116	-0.758608	0.248	0.286	1	6
Irgq	0.476297	-0.758525	0.039	0.053	1	6
Ghdc	0.230847	-0.758433	0.047	0.074	1	6
Camsap2	0.964131	-0.758338	0.165	0.159	1	6
Rnasel	0.468101	-0.758096	0.268	0.27	1	6
Otud7b	0.0159952	-0.757706	0.205	0.302	1	6
Zfp467	0.545213	-0.75759	0.106	0.116	1	6
Rbbp5	0.450948	-0.757429	0.142	0.111	1	6
Neu1	0.74316	-0.75719	0.15	0.148	1	6
Vps72	0.0613722	-0.75686	0.307	0.354	1	6
Zfp931	0.270282	-0.756583	0.098	0.127	1	6
Zcchc18	0.793452	-0.756544	0.087	0.09	1	6
Gucy1a1	0.400994	-0.756198	0.004	0.011	1	6
H2bc4	0.768933	-0.756017	0.13	0.132	1	6
Nt5c3b	0.394036	-0.755825	0.146	0.164	1	6
Bik	0.709226	-0.755302	0.012	0.016	1	6
Marchf9	0.269906	-0.75508	0.02	0.037	1	6
Snx11	0.271206	-0.754915	0.165	0.196	1	6
Fbxl18	0.919571	-0.754871	0.035	0.037	1	6
Gm3336	0.400994	-0.754821	0.004	0.011	1	6
Traf6	0.000554643	-0.754745	0.378	0.492	1	6
Zfp81	0.857371	-0.754125	0.075	0.069	1	6
Chml	0.971553	-0.753284	0.047	0.048	1	6
Arhgef28	0.87832	-0.752742	0.024	0.021	1	6
Papolg	0.237665	-0.752142	0.11	0.143	1	6
Phyh	0.0607706	-0.750822	0.146	0.206	1	6
Slc35f5	0.39633	-0.750476	0.024	0.037	1	6
Ror1	0.443444	-0.750474	0.043	0.058	1	6
Kctd5	0.469198	-0.750056	0.142	0.159	1	6
Rnft2	0.709226	-0.749885	0.012	0.016	1	6
Zp3r	0.767701	-0.749442	0.008	0.011	1	6
Dip2a	0.712018	-0.749426	0.012	0.016	1	6
Ncam1	0.712018	-0.749208	0.012	0.016	1	6
Myo18b	0.403962	-0.748885	0.004	0.011	1	6
Hycc1	0.067456	-0.748127	0.213	0.265	1	6
Scnm1	0.115615	-0.747521	0.165	0.212	1	6
Tnpo2	0.268803	-0.747254	0.11	0.138	1	6
Ildr1	0.714813	-0.747244	0.012	0.016	1	6
Ass1	0.4672	-0.747144	0.15	0.164	1	6
Tmem159	0.559849	-0.74709	0.028	0.037	1	6
Pgghg	0.570747	-0.745991	0.047	0.058	1	6
Nfic	0.184328	-0.745438	0.201	0.233	1	6
Pea15a	0.100104	-0.745314	0.437	0.444	1	6
Mkks	0.955575	-0.744762	0.031	0.032	1	6
Prss57	0.371343	-0.744312	0.055	0.074	1	6
Elp4	0.0551208	-0.744291	0.272	0.323	1	6
Mtrfr	0.398092	-0.743742	0.091	0.111	1	6
Cul9	0.111153	-0.742931	0.154	0.201	1	6
Cask	0.112942	-0.742886	0.169	0.212	1	6
H2-Oa	1.72126e-05	-0.742196	0.618	0.725	0.284868	6
Zfp40	0.565455	-0.742171	0.047	0.058	1	6
Fam76b	0.0694986	-0.741892	0.382	0.418	1	6
Gmpr2	0.106823	-0.741755	0.142	0.196	1	6
Kctd13	0.844482	-0.741503	0.142	0.127	1	6
Klhdc3	0.436761	-0.741313	0.098	0.116	1	6
Dnaaf10	0.436761	-0.74079	0.098	0.116	1	6
Nup205	0.0235636	-0.740753	0.122	0.19	1	6
Frem2	0.627292	-0.74065	0.02	0.026	1	6
Iqce	0.75625	-0.740606	0.094	0.101	1	6
Amdhd2	0.0642295	-0.739918	0.13	0.185	1	6
Cmc2	0.568299	-0.739583	0.134	0.143	1	6
Mfsd3	0.969139	-0.738681	0.028	0.026	1	6
Vcpip1	0.0302767	-0.738571	0.295	0.354	1	6
Lonp2	0.0774104	-0.737504	0.398	0.423	1	6
Ptprn2	0.43469	-0.737183	0.008	0.016	1	6
Tmem154	0.406856	-0.736386	0.126	0.148	1	6
Nepro	0.422324	-0.736321	0.047	0.063	1	6
Nphs1	0.915091	-0.736031	0.012	0.011	1	6
Toe1	0.678661	-0.735681	0.087	0.095	1	6
Pogk	0.974103	-0.734704	0.083	0.079	1	6
Ccdc77	0.173005	-0.734483	0.114	0.153	1	6
Aox4	0.403962	-0.73446	0.004	0.011	1	6
Rph3al	0.563834	-0.734312	0.043	0.032	1	6
Lsm14b	0.719112	-0.734287	0.063	0.069	1	6
Ythdf1	0.827311	-0.733836	0.295	0.254	1	6
Cwf19l2	0.00909755	-0.732981	0.465	0.519	1	6
Neurl4	0.609972	-0.731891	0.122	0.101	1	6
Peak1	0.0514534	-0.731813	0.228	0.296	1	6
Kif23	0.329154	-0.731178	0.043	0.063	1	6
Arhgef10l	0.510703	-0.730781	0.248	0.206	1	6
Pex3	0.0200863	-0.730686	0.173	0.254	1	6
Btbd8	0.25684	-0.730671	0.138	0.169	1	6
Polr3c	0.614741	-0.730502	0.213	0.217	1	6
Trim3	0.0342763	-0.730298	0.154	0.212	1	6
Spry1	0.777711	-0.730286	0.028	0.032	1	6
Gnb1l	0.360608	-0.730281	0.031	0.048	1	6
Ccdc157	0.389224	-0.730256	0.024	0.037	1	6
Mfsd5	0.371995	-0.72974	0.091	0.111	1	6
Tma16	0.402975	-0.729739	0.118	0.138	1	6
Spen	0.0755397	-0.72961	0.248	0.302	1	6
Dnase1l3	0.00342376	-0.729103	0.173	0.28	1	6
Prss2	0.767701	-0.728768	0.008	0.011	1	6
Bcat2	0.0424544	-0.72814	0.201	0.259	1	6
Rpusd1	0.166148	-0.727565	0.039	0.069	1	6
Syne1	0.445225	-0.727485	0.193	0.212	1	6
Agpat3	0.120919	-0.727237	0.228	0.27	1	6
Xndc1	0.936209	-0.727217	0.039	0.037	1	6
Zfp595	0.352244	-0.726222	0.039	0.058	1	6
Gm12185	0.114685	-0.726184	0.142	0.19	1	6
Rnf181	0.0130416	-0.725975	0.28	0.365	1	6
Nedd1	0.174878	-0.724765	0.106	0.143	1	6
H2-Q10	0.773778	-0.724232	0.028	0.032	1	6
Trim2	0.897391	-0.724035	0.02	0.021	1	6
Slc38a9	0.135483	-0.723806	0.441	0.455	1	6
Trim68	0.934225	-0.723509	0.047	0.048	1	6
Gdpd3	0.0769516	-0.723279	0.012	0.037	1	6
3830406C13Rik	0.0726314	-0.72321	0.24	0.296	1	6
Zfp7	0.915091	-0.722572	0.012	0.011	1	6
Septin8	0.96107	-0.721935	0.059	0.058	1	6
Snx27	0.122686	-0.72172	0.244	0.291	1	6
Ifngr2	0.00439061	-0.721479	0.315	0.402	1	6
Slc35g1	0.43469	-0.721226	0.008	0.016	1	6
Jmjd7	0.899821	-0.721025	0.02	0.021	1	6
1700001K19Rik	0.399792	-0.720833	0.102	0.127	1	6
Spink10	0.664091	-0.720357	0.016	0.021	1	6
Cers4	0.282896	-0.719798	0.079	0.106	1	6
Mad2l2	0.887887	-0.719646	0.102	0.101	1	6
Arhgef10	0.0178621	-0.719221	0.323	0.407	1	6
Gemin2	0.0557001	-0.719213	0.087	0.143	1	6
Faah	0.935645	-0.718796	0.091	0.09	1	6
Slc25a24	0.139892	-0.718465	0.091	0.132	1	6
Ift88	0.704248	-0.718405	0.083	0.069	1	6
Dnajc30	0.0471717	-0.718279	0.106	0.169	1	6
Nagk	0.166636	-0.718233	0.165	0.206	1	6
C2cd2l	0.803489	-0.718085	0.055	0.048	1	6
Hgs	0.763286	-0.717987	0.102	0.106	1	6
Zfp382	0.788554	-0.71763	0.031	0.026	1	6
Psd4	0.0287934	-0.717012	0.22	0.286	1	6
Hipk3	0.123838	-0.716655	0.268	0.307	1	6
Mrpl47	0.519202	-0.716582	0.071	0.085	1	6
Gorab	0.333002	-0.716336	0.067	0.09	1	6
Sfi1	0.0522833	-0.715978	0.291	0.349	1	6
Obi1	0.489358	-0.715728	0.079	0.095	1	6
Ubr1	0.343182	-0.715655	0.268	0.28	1	6
Nars2	0.626589	-0.715648	0.185	0.196	1	6
Pold3	0.914885	-0.715091	0.165	0.159	1	6
Bckdk	0.111324	-0.713837	0.165	0.217	1	6
Thap1	0.347763	-0.713796	0.094	0.116	1	6
Grk3	0.0205409	-0.713321	0.303	0.376	1	6
Arhgef7	0.345652	-0.71328	0.205	0.222	1	6
Cog1	0.506574	-0.713184	0.13	0.143	1	6
Tgfa	0.619605	-0.711339	0.035	0.026	1	6
Zbtb4	0.49905	-0.711228	0.146	0.116	1	6
Lpcat1	0.771814	-0.709631	0.028	0.032	1	6
Txn1	9.12139e-08	-0.707676	0.768	0.841	0.00150959	6
Egf	0.672215	-0.707474	0.028	0.021	1	6
Zfp119a	0.391289	-0.707278	0.028	0.042	1	6
Cap2	0.438565	-0.707152	0.012	0.021	1	6
Cep97	0.664528	-0.706735	0.098	0.106	1	6
Cpq	0.115135	-0.706565	0.307	0.344	1	6
Shkbp1	0.208118	-0.706041	0.114	0.148	1	6
H3c13	0.267171	-0.705791	0.016	0.032	1	6
Mtor	0.502093	-0.704812	0.26	0.259	1	6
Mtif3	0.59839	-0.704339	0.134	0.143	1	6
C2cd2	0.884912	-0.703845	0.157	0.148	1	6
Aldoc	0.844361	-0.703625	0.039	0.042	1	6
Tcaim	0.252829	-0.702964	0.075	0.106	1	6
Faap24	0.836488	-0.702684	0.059	0.053	1	6
Pttg1	0.0414146	-0.702596	0.252	0.317	1	6
Foxj2	0.316621	-0.702173	0.228	0.243	1	6
Odf2l	0.397152	-0.702004	0.118	0.138	1	6
Dnaaf2	0.712018	-0.700847	0.012	0.016	1	6
Il15ra	0.403514	-0.700822	0.024	0.037	1	6
Slc52a2	0.507045	-0.700713	0.118	0.132	1	6
Chek2	0.679917	-0.700438	0.035	0.042	1	6
Pi4kb	0.445444	-0.700195	0.193	0.206	1	6
Armcx1	0.709226	-0.70014	0.012	0.016	1	6
Tmem69	0.994884	-0.700032	0.043	0.042	1	6
Abcc4	0.122871	-0.699565	0.161	0.212	1	6
D3Ertd751e	0.125614	-0.698535	0.106	0.153	1	6
Lss	0.822108	-0.698387	0.039	0.042	1	6
9930012K11Rik	0.915091	-0.698252	0.012	0.011	1	6
Rin3	0.144348	-0.697883	0.126	0.169	1	6
Rad52	0.159789	-0.697316	0.173	0.217	1	6
Msantd1	0.712018	-0.697256	0.012	0.016	1	6
Wdr76	0.299786	-0.697187	0.051	0.074	1	6
Decr2	0.488032	-0.697068	0.094	0.111	1	6
Zfp410	0.107406	-0.696856	0.146	0.196	1	6
Cdkl2	0.403962	-0.696709	0.004	0.011	1	6
Bach1	0.00270512	-0.6962	0.315	0.429	1	6
Spryd3	0.53086	-0.695981	0.071	0.085	1	6
Csgalnact1	0.764206	-0.695727	0.008	0.011	1	6
Zfp626	0.584414	-0.69566	0.063	0.074	1	6
Camkk2	0.261453	-0.694848	0.142	0.175	1	6
Snapc2	0.476449	-0.694149	0.067	0.085	1	6
Cnbd2	0.488938	-0.693201	0.11	0.127	1	6
Dnaaf5	0.283749	-0.692477	0.055	0.079	1	6
Gimap1	0.0278978	-0.692247	0.319	0.392	1	6
Padi4	0.259677	-0.691908	0.012	0.026	1	6
Jade2	0.299366	-0.691869	0.13	0.159	1	6
Vrk1	0.0215096	-0.691845	0.354	0.423	1	6
Hs6st1	0.638675	-0.691121	0.102	0.111	1	6
Stat2	2.65685e-05	-0.690311	0.476	0.614	0.439709	6
Usp25	0.0111815	-0.689962	0.496	0.566	1	6
Abca2	0.179603	-0.689435	0.091	0.127	1	6
Zc2hc1a	0.183219	-0.68937	0.071	0.106	1	6
Mtfmt	0.219178	-0.689145	0.106	0.138	1	6
Mrrf	0.519767	-0.688979	0.075	0.09	1	6
Dhfr	0.498599	-0.688579	0.035	0.048	1	6
Wdfy2	0.0224402	-0.68854	0.161	0.238	1	6
Ndufaf5	0.256113	-0.687674	0.087	0.116	1	6
Impdh1	0.328188	-0.687212	0.043	0.063	1	6
Fbxl19	0.625283	-0.687034	0.063	0.074	1	6
Gm6133	0.767701	-0.68695	0.008	0.011	1	6
Decr1	0.0501224	-0.686935	0.157	0.222	1	6
Snapin	0.0140284	-0.68632	0.205	0.286	1	6
Cpeb4	0.112591	-0.686315	0.559	0.54	1	6
Il10ra	9.20846e-06	-0.686209	0.445	0.598	0.1524	6
Dis3l2	0.00350808	-0.686175	0.421	0.508	1	6
Ndufaf1	0.235568	-0.686084	0.071	0.101	1	6
Jpt2	0.35577	-0.68607	0.114	0.138	1	6
Casp8ap2	0.070264	-0.685508	0.197	0.254	1	6
Serpini1	0.138139	-0.684874	0.181	0.233	1	6
Slc25a44	0.960217	-0.684753	0.083	0.079	1	6
Dph5	0.835314	-0.6844	0.169	0.169	1	6
Eci1	0.346982	-0.684388	0.146	0.169	1	6
Itpripl2	0.476285	-0.684091	0.059	0.074	1	6
Itga9	0.764206	-0.68402	0.008	0.011	1	6
Phc2	0.00779633	-0.683597	0.465	0.545	1	6
Fut4	0.826151	-0.683517	0.071	0.063	1	6
Pigc	0.943384	-0.683109	0.039	0.037	1	6
Mis12	0.379005	-0.682071	0.091	0.111	1	6
Nopchap1	0.385362	-0.681593	0.181	0.196	1	6
Tgtp2	0.899821	-0.681555	0.02	0.021	1	6
Git1	0.504879	-0.68106	0.055	0.069	1	6
Dpagt1	0.554568	-0.680668	0.071	0.085	1	6
Ccdc180	0.406409	-0.680336	0.024	0.037	1	6
Naaa	0.409427	-0.680156	0.094	0.069	1	6
Gtpbp10	0.620123	-0.68005	0.075	0.085	1	6
Tsfm	0.253285	-0.679263	0.224	0.243	1	6
Gtf2e1	0.25727	-0.677072	0.106	0.138	1	6
Meis1	0.0521863	-0.676557	0.154	0.217	1	6
Tmem104	0.457802	-0.675648	0.043	0.058	1	6
Osbp2	0.855236	-0.675119	0.087	0.09	1	6
Bpnt2	0.079105	-0.673982	0.213	0.265	1	6
Gmeb1	0.249073	-0.673979	0.134	0.169	1	6
Hdac1	0.0124712	-0.673732	0.429	0.476	1	6
Srr	0.221723	-0.673434	0.138	0.175	1	6
Cbwd1	0.12356	-0.673293	0.26	0.296	1	6
Ninj2	0.453295	-0.673252	0.067	0.085	1	6
Opn3	0.764206	-0.673236	0.008	0.011	1	6
Gtf2a1l	0.537702	-0.672631	0.031	0.042	1	6
Irgc1	0.0117555	-0.671149	0.15	0.233	1	6
Klri1	0.400994	-0.670842	0.004	0.011	1	6
Coq7	0.253871	-0.670446	0.098	0.127	1	6
Mga	0.00067929	-0.670267	0.457	0.561	1	6
Opa1	0.128148	-0.669859	0.311	0.328	1	6
Abhd16a	0.091334	-0.669192	0.224	0.275	1	6
Srd5a3	0.0933959	-0.66899	0.256	0.302	1	6
Epg5	0.222732	-0.668536	0.213	0.238	1	6
Thbs3	0.897391	-0.668324	0.02	0.021	1	6
Skp2	0.254217	-0.668265	0.012	0.026	1	6
Rsph10b	0.712018	-0.667634	0.012	0.016	1	6
Siglecg	0.0326326	-0.667599	0.311	0.376	1	6
AI837181	0.26191	-0.667592	0.197	0.217	1	6
Etv6	3.38167e-08	-0.667555	0.858	0.952	0.000559666	6
Prdm4	0.499438	-0.667522	0.075	0.09	1	6
Idua	0.646909	-0.667163	0.087	0.095	1	6
Rnf214	0.50136	-0.666807	0.15	0.164	1	6
Rom1	0.17907	-0.666735	0.067	0.101	1	6
Coro1b	0.187018	-0.666119	0.138	0.175	1	6
H1f5	0.262175	-0.665772	0.016	0.032	1	6
Lratd2	0.772796	-0.665616	0.031	0.026	1	6
Tnfrsf18	0.218517	-0.665086	0.197	0.228	1	6
Txndc12	0.143858	-0.665032	0.165	0.212	1	6
Stx2	0.643539	-0.664981	0.039	0.048	1	6
Zcchc3	0.43243	-0.664194	0.012	0.021	1	6
Dcaf4	0.243584	-0.663936	0.094	0.127	1	6
Maf	0.281391	-0.663813	0.075	0.048	1	6
Serpinh1	0.665268	-0.663545	0.197	0.175	1	6
Abcc1	0.0064159	-0.66308	0.319	0.418	1	6
Ipmk	0.0172409	-0.662842	0.098	0.175	1	6
Clp1	0.853263	-0.661887	0.165	0.148	1	6
Jkamp	0.0408554	-0.661701	0.224	0.296	1	6
Cks2	0.098435	-0.661641	0.252	0.307	1	6
Zc3hc1	0.459103	-0.660895	0.11	0.127	1	6
Sap18b	0.743	-0.660856	0.047	0.053	1	6
Ccdc71	0.653784	-0.660852	0.055	0.063	1	6
Plscr4	0.773433	-0.660683	0.02	0.016	1	6
Usp45	0.397855	-0.660096	0.189	0.206	1	6
Gnpda1	0.759169	-0.659961	0.13	0.132	1	6
Hps6	0.659374	-0.659614	0.016	0.021	1	6
Gpr160	0.91987	-0.659335	0.13	0.127	1	6
Pisd	0.162578	-0.659303	0.165	0.206	1	6
Tyw3	0.712018	-0.658931	0.012	0.016	1	6
Nicn1	0.629362	-0.658518	0.02	0.026	1	6
Hivep3	0.0548444	-0.658287	0.484	0.503	1	6
Lclat1	0.00177882	-0.658119	0.244	0.37	1	6
Helq	0.975592	-0.65797	0.094	0.09	1	6
Cbx2	0.403962	-0.657922	0.004	0.011	1	6
Pxn	0.227273	-0.657543	0.236	0.265	1	6
Nfatc2ip	0.880776	-0.656935	0.079	0.079	1	6
Mapkapk5	0.765931	-0.655971	0.028	0.032	1	6
Spg7	0.177945	-0.655828	0.161	0.201	1	6
Nelfcd	0.0767543	-0.655553	0.13	0.185	1	6
Clip1	0.0585988	-0.655432	0.228	0.291	1	6
Lonrf1	0.66579	-0.655268	0.055	0.063	1	6
Rfk	0.820307	-0.65408	0.276	0.254	1	6
Ercc6l2	0.0851546	-0.65363	0.201	0.259	1	6
Angpt1	0.839153	-0.653613	0.091	0.095	1	6
5730480H06Rik	0.610972	-0.653391	0.142	0.148	1	6
Spred1	0.0701983	-0.653374	0.106	0.164	1	6
Msrb1	0.421254	-0.652263	0.224	0.238	1	6
Ankrd61	0.785912	-0.652129	0.02	0.016	1	6
Arhgap35	0.998274	-0.651826	0.201	0.19	1	6
Myh14	0.587868	-0.651718	0.024	0.016	1	6
Extl3	0.975698	-0.651336	0.118	0.111	1	6
Gpam	0.850381	-0.651307	0.067	0.069	1	6
Prtn3	0.764206	-0.651268	0.008	0.011	1	6
Pnpt1	0.427104	-0.65089	0.126	0.143	1	6
Lpgat1	0.00028499	-0.6508	0.543	0.672	1	6
Pomgnt1	0.0650739	-0.650767	0.059	0.106	1	6
Zfp398	0.00581912	-0.650311	0.39	0.487	1	6
H2bc8	0.197628	-0.650075	0.063	0.095	1	6
Psmd6	0.0179708	-0.649846	0.406	0.444	1	6
Dynlt2b	0.0267659	-0.64971	0.244	0.317	1	6
Ak3	0.291105	-0.649686	0.165	0.19	1	6
Trmt2b	0.861556	-0.649345	0.169	0.164	1	6
Gfi1	0.967012	-0.649315	0.028	0.026	1	6
Sugct	0.403767	-0.649306	0.047	0.063	1	6
Pld2	0.68488	-0.649156	0.035	0.042	1	6
Arl13b	0.456852	-0.649	0.201	0.217	1	6
Pik3c2a	0.162732	-0.648671	0.24	0.286	1	6
Trim12a	0.000124225	-0.648063	0.539	0.63	1	6
Apobec2	0.403962	-0.648063	0.004	0.011	1	6
Cyba	4.33873e-13	-0.64766	0.941	0.958	7.18059e-09	6
Matcap1	0.725727	-0.647268	0.031	0.037	1	6
Atp1a3	0.432039	-0.647106	0.315	0.312	1	6
Ctnnal1	0.894962	-0.646907	0.02	0.021	1	6
Erg	0.658936	-0.646428	0.039	0.048	1	6
H2aj	0.00236683	-0.645887	0.898	0.931	1	6
Ropn1l	0.773778	-0.645038	0.028	0.032	1	6
Slc31a1	0.19418	-0.644886	0.165	0.201	1	6
Akap10	0.0139189	-0.644742	0.339	0.418	1	6
Septin2	0.462045	-0.644575	0.063	0.079	1	6
Traf5	0.343829	-0.644491	0.165	0.19	1	6
Nol10	0.715675	-0.644474	0.224	0.222	1	6
Kctd4	0.962758	-0.644324	0.028	0.026	1	6
Scfd2	0.128346	-0.644225	0.437	0.455	1	6
Dnajc28	0.915091	-0.644217	0.012	0.011	1	6
Pafah1b2	0.0370155	-0.643052	0.26	0.317	1	6
1600014C10Rik	0.232148	-0.642905	0.146	0.18	1	6
Grap	0.00350675	-0.642758	0.5	0.571	1	6
Cdkn2aipnl	0.176141	-0.642652	0.161	0.201	1	6
Bmt2	0.0048551	-0.642225	0.559	0.656	1	6
Polr2h	0.021419	-0.641955	0.252	0.328	1	6
St7l	0.375944	-0.641861	0.193	0.222	1	6
P2ry12	0.355986	-0.641856	0.39	0.392	1	6
Dcaf1	0.0211021	-0.641277	0.276	0.349	1	6
Zdhhc16	0.281323	-0.64127	0.059	0.085	1	6
Tifab	0.00443651	-0.641133	0.252	0.365	1	6
Slc30a9	0.277685	-0.641042	0.213	0.238	1	6
Polr1has	0.979399	-0.640938	0.055	0.053	1	6
Traf2	0.503301	-0.640688	0.157	0.169	1	6
Tmem126b	0.835896	-0.640483	0.114	0.116	1	6
Nudt1	0.186725	-0.639989	0.087	0.122	1	6
Wdr27	0.760715	-0.639903	0.008	0.011	1	6
Zbed3	0.89693	-0.6396	0.118	0.116	1	6
Egr1	0.210455	-0.639595	0.437	0.45	1	6
Mrpl48	0.121106	-0.638921	0.283	0.323	1	6
Knl1	0.370189	-0.638777	0.063	0.042	1	6
Tigit	0.459371	-0.638024	0.02	0.011	1	6
Zfp992	0.778213	-0.637135	0.146	0.143	1	6
Ddx11	0.851832	-0.637047	0.035	0.032	1	6
Fam136a	0.494676	-0.636535	0.169	0.18	1	6
Rida	0.886709	-0.636071	0.051	0.053	1	6
Uhrf1bp1	0.984757	-0.635996	0.016	0.016	1	6
Btbd2	0.216945	-0.635896	0.063	0.095	1	6
Icos	0.108504	-0.63587	0.031	0.063	1	6
Zc3h12c	1.42815e-05	-0.635142	0.791	0.894	0.236359	6
Or2m13	0.530071	-0.635111	0.031	0.042	1	6
Arel1	0.676443	-0.634873	0.154	0.159	1	6
Cry2	0.38716	-0.634828	0.075	0.095	1	6
Sirt5	0.857157	-0.634696	0.098	0.101	1	6
Vegfd	0.555647	-0.634596	0.067	0.079	1	6
Mphosph8	0.318014	-0.634507	0.268	0.286	1	6
Kdm7a	0.49183	-0.633439	0.378	0.36	1	6
Mtfr1	0.303594	-0.63269	0.154	0.111	1	6
Cdnf	0.671349	-0.632534	0.059	0.069	1	6
2010315B03Rik	0.467929	-0.632258	0.15	0.164	1	6
Tigd2	0.0976614	-0.631893	0.311	0.37	1	6
[truncated: 7,645 more rows]

## Sheet: WT ECTV vs Ifnar1 ECTV clu8-iMO
	p_val	avg_log2FC	pct.1	pct.2	p_val_adj	cluster		high in WT ECTV 1 dpi (-)	high in Ifnar1 ko ECTV 1 dpi (+)
Ifi27l2a	5.09956e-27	-8.26868	0.022	0.735	8.43978e-23	8
S100a9	0.00160985	-7.55631	0.022	0.14	1	8
Retnlg	0.0890846	-6.07108	0.011	0.051	1	8
S100a8	0.0416549	-5.98833	0.054	0.126	1	8
Oasl2	1.53591e-06	-5.61891	0	0.214	0.0254194	8
Rsad2	9.0523e-05	-5.61092	0	0.149	1	8
Rtp4	3.77502e-06	-5.52105	0	0.2	0.0624766	8
Oas1a	4.5221e-07	-5.32272	0	0.233	0.00748407	8
Cd5l	0.254798	-5.28775	0	0.014	1	8
Mx1	0.000275607	-5.02331	0	0.13	1	8
Slfn4	0.00316665	-4.93183	0	0.088	1	8
Dcn	0.139656	-4.86363	0	0.023	1	8
Isg15	1.14019e-05	-4.75084	0.022	0.219	0.188701	8
Adamdec1	0.139656	-4.66062	0	0.023	1	8
Ifi206	2.91063e-05	-4.6193	0	0.167	0.481709	8
Ifit3	0.00705144	-4.61617	0	0.074	1	8
Cd300e	0.0092028	-4.60645	0	0.07	1	8
Mx2	0.00316665	-4.55023	0	0.088	1	8
Serpini1	0.0156772	-4.44901	0	0.06	1	8
Mapkbp1	0.00413693	-4.37776	0	0.084	1	8
Oas3	0.000119803	-4.35884	0	0.144	1	8
Dscam	0.154094	-4.35421	0.011	0.042	1	8
Slfn5	7.4634e-09	-4.31645	0.043	0.353	0.000123519	8
Cxcl3	0.254798	-4.13582	0	0.014	1	8
Cxcl12	0.104958	-4.03094	0	0.028	1	8
Myo1d	0.0350027	-4.02056	0	0.047	1	8
Tvp23a	0.223919	-3.96027	0.022	0.051	1	8
Itga8	0.0405923	-3.94694	0.011	0.065	1	8
Lhfp	0.139656	-3.91942	0	0.023	1	8
Ifi27	8.84288e-06	-3.90116	0.032	0.237	0.14635	8
Enpp1	0.104958	-3.88886	0	0.028	1	8
Grik1	0.254798	-3.84535	0	0.014	1	8
Ifit1	0.0350027	-3.84031	0	0.047	1	8
Fgfr1	0.187414	-3.80756	0	0.019	1	8
Slfn8	6.07677e-06	-3.78819	0.032	0.247	0.100571	8
Csmd1	0.254798	-3.72004	0	0.014	1	8
2310022B05Rik	0.0793458	-3.7144	0	0.033	1	8
Cish	0.0458667	-3.69836	0	0.042	1	8
Kcnj16	0.254798	-3.69527	0	0.014	1	8
Prkci	0.0204726	-3.61876	0	0.056	1	8
Oas2	0.00413693	-3.60344	0	0.084	1	8
Zfp113	0.0793458	-3.59732	0	0.033	1	8
Asprv1	0.187414	-3.56478	0	0.019	1	8
Serpinb9	0.0156772	-3.53192	0	0.06	1	8
Ifit2	0.0458667	-3.531	0	0.042	1	8
BC147527	0.000140718	-3.52001	0.011	0.163	1	8
Cxcl10	0.00415499	-3.50825	0.022	0.126	1	8
Pml	0.00295667	-3.50293	0.011	0.112	1	8
Mtfmt	0.00413693	-3.50279	0	0.084	1	8
Ifi213	2.89079e-05	-3.49852	0.011	0.191	0.478425	8
Hook1	0.0458667	-3.49308	0	0.042	1	8
Slc22a21	0.0693306	-3.49216	0.011	0.056	1	8
Odad4	0.187414	-3.48761	0	0.019	1	8
Oasl1	0.00858431	-3.47899	0.011	0.093	1	8
Tmem38a	0.118635	-3.47732	0.011	0.047	1	8
Fam178b	0.254798	-3.47406	0	0.014	1	8
Lrg1	0.104958	-3.47128	0	0.028	1	8
Rccd1	0.0458667	-3.46656	0	0.042	1	8
Tubgcp6	0.0267544	-3.44969	0	0.051	1	8
Nup210l	0.0267544	-3.44382	0	0.051	1	8
Tnfsf8	0.0602353	-3.42064	0	0.037	1	8
Prkg1	0.104958	-3.41242	0	0.028	1	8
Nr3c2	0.0267544	-3.39987	0	0.051	1	8
Hibch	0.00370185	-3.39838	0.011	0.107	1	8
Zswim3	0.0204726	-3.39656	0	0.056	1	8
Marco	0.267985	-3.37358	0.011	0.033	1	8
Tgif2	0.0699462	-3.37336	0.011	0.056	1	8
Usp18	0.00269862	-3.36964	0.022	0.13	1	8
Cdh5	0.139656	-3.36927	0	0.023	1	8
Pomgnt1	0.309436	-3.36761	0.022	0.047	1	8
Kcnip3	0.00595514	-3.35705	0.022	0.116	1	8
H3c13	0.265806	-3.34322	0.011	0.033	1	8
Itgae	0.0525716	-3.33766	0.011	0.06	1	8
Zfhx2	0.0350027	-3.33464	0	0.047	1	8
Nebl	0.0204726	-3.29903	0	0.056	1	8
Gm19684	0.0180143	-3.2811	0.011	0.079	1	8
Pcx	0.915183	-3.25044	0.011	0.009	1	8
G0s2	0.184628	-3.24509	0.032	0.07	1	8
H2bc14	0.254798	-3.21521	0	0.014	1	8
St3gal6	0.00338273	-3.2082	0.032	0.144	1	8
Ppp1r8	0.00643072	-3.20152	0.011	0.098	1	8
Hlf	0.0793458	-3.18701	0	0.033	1	8
Ankrd50	0.0402273	-3.18428	0.011	0.065	1	8
Ddx60	0.0108245	-3.16507	0.011	0.088	1	8
Spon1	0.0204726	-3.16461	0	0.056	1	8
Pcdh15	0.254798	-3.16231	0	0.014	1	8
Dlg3	0.187414	-3.16215	0	0.019	1	8
F830045P16Rik	0.104958	-3.16124	0	0.028	1	8
Adrb1	0.0350027	-3.15632	0	0.047	1	8
H2bc18	0.26364	-3.15624	0.011	0.033	1	8
Vnn3	0.116602	-3.15241	0.011	0.047	1	8
Ifit3b	0.0350027	-3.1505	0	0.047	1	8
Itgad	0.187414	-3.14431	0	0.019	1	8
Nmnat3	0.00295667	-3.12455	0.011	0.112	1	8
Tshz2	0.254798	-3.12357	0	0.014	1	8
Gcfc2	0.0793458	-3.1222	0	0.033	1	8
Rpl39l	0.187414	-3.12065	0	0.019	1	8
Egr2	0.0156772	-3.1175	0	0.06	1	8
Mavs	0.033385	-3.10714	0.022	0.088	1	8
Trib3	0.254798	-3.09928	0	0.014	1	8
Tfcp2	0.0914544	-3.09628	0.011	0.051	1	8
Wasf1	0.254798	-3.09563	0	0.014	1	8
Tgtp1	0.187414	-3.08819	0	0.019	1	8
Frmd5	0.0793458	-3.07858	0	0.033	1	8
Dcaf1	0.00411086	-3.05762	0.011	0.107	1	8
Mxra7	0.254798	-3.05664	0	0.014	1	8
Gabbr1	0.0535201	-3.04918	0.011	0.06	1	8
Sirt6	0.0350027	-3.04674	0	0.047	1	8
Cacna1a	0.187414	-3.04579	0	0.019	1	8
Chst14	0.104958	-3.04068	0	0.028	1	8
Gstp3	0.0267544	-3.0347	0	0.051	1	8
Saa3	0.139656	-3.03107	0	0.023	1	8
Parp10	0.00909052	-3.02871	0.022	0.112	1	8
Cenps	0.610517	-3.02608	0.011	0.019	1	8
Bicd1	0.187414	-3.02306	0	0.019	1	8
Dffa	0.0156772	-3.02253	0	0.06	1	8
Wdr76	0.0204726	-3.01285	0	0.056	1	8
Ntm	0.139656	-3.00728	0	0.023	1	8
Slc35e3	0.0535201	-3.00527	0.011	0.06	1	8
Dtd1	0.0249151	-3.00023	0.022	0.093	1	8
H3c4	0.0235393	-2.99353	0.022	0.093	1	8
Zfyve1	0.00521842	-2.98952	0.022	0.121	1	8
Oplah	0.139656	-2.97253	0	0.023	1	8
Phtf1	0.0425721	-2.95095	0.022	0.084	1	8
Efcab9	0.254798	-2.94729	0	0.014	1	8
Extl1	0.254798	-2.94496	0	0.014	1	8
Gng7	0.187414	-2.9429	0	0.019	1	8
Ptpn13	0.187414	-2.91708	0	0.019	1	8
Cd209b	0.804844	-2.90713	0.032	0.037	1	8
Ttc38	0.0120103	-2.90281	0	0.065	1	8
Gng5c	0.0793458	-2.88815	0	0.033	1	8
Ccdc61	0.0267544	-2.88811	0	0.051	1	8
Fndc7	0.20388	-2.87905	0.011	0.037	1	8
Zfp54	0.254798	-2.87831	0	0.014	1	8
Bcl2l2	0.0793458	-2.87486	0	0.033	1	8
Satb2	0.0267544	-2.87003	0	0.051	1	8
Bbs4	0.0793458	-2.86859	0	0.033	1	8
Wdr75	0.0120103	-2.86836	0	0.065	1	8
Cystm1	0.0602353	-2.86717	0	0.037	1	8
Itga2b	0.254798	-2.86329	0	0.014	1	8
Ifit1bl1	0.104958	-2.86253	0	0.028	1	8
Ttll12	0.0458667	-2.85687	0	0.042	1	8
Neto2	0.223919	-2.85475	0.022	0.051	1	8
Cxcl9	0.0718201	-2.85115	0.011	0.056	1	8
Pdpn	0.187414	-2.84864	0	0.019	1	8
Cyp39a1	0.0307825	-2.84837	0.011	0.07	1	8
Podn	0.187414	-2.84183	0	0.019	1	8
Mis18bp1	0.0350027	-2.83787	0	0.047	1	8
H2bc9	0.139656	-2.83733	0	0.023	1	8
Klhl42	0.202185	-2.83165	0.011	0.037	1	8
Bfsp1	0.254798	-2.82334	0	0.014	1	8
Xcl1	0.0432266	-2.82253	0.011	0.065	1	8
Tnfsf15	0.0718201	-2.81698	0.011	0.056	1	8
Ccdc51	0.0525716	-2.8157	0.011	0.06	1	8
Cmtm4	0.104958	-2.81489	0	0.028	1	8
Gdf9	0.139656	-2.80904	0	0.023	1	8
Espl1	0.0458667	-2.80337	0	0.042	1	8
Tlcd3b	0.104958	-2.80141	0	0.028	1	8
Tspyl3	0.355937	-2.80079	0.011	0.028	1	8
Irf9	4.78967e-05	-2.79729	0.118	0.33	0.792691	8
Bahcc1	0.139656	-2.79596	0	0.023	1	8
Cdkl2	0.254798	-2.77971	0	0.014	1	8
Slx4	0.104958	-2.77866	0	0.028	1	8
Cpm	0.0267544	-2.77748	0	0.051	1	8
Ccdc148	0.139656	-2.77626	0	0.023	1	8
2310057M21Rik	0.0458667	-2.77192	0	0.042	1	8
Mlycd	0.0194807	-2.76345	0.022	0.098	1	8
Ppcdc	0.048497	-2.76254	0.032	0.098	1	8
Hdc	0.0900677	-2.76181	0.043	0.098	1	8
Serac1	0.139656	-2.76163	0	0.023	1	8
Tubb2b	0.139656	-2.75887	0	0.023	1	8
Gm20537	0.187414	-2.75443	0	0.019	1	8
Rtn4ip1	0.119662	-2.75226	0.011	0.047	1	8
Spaca6	0.254798	-2.74441	0	0.014	1	8
Gmppa	0.0548157	-2.74281	0.032	0.093	1	8
Aire	0.254798	-2.74269	0	0.014	1	8
Cbr4	0.0350027	-2.73465	0	0.047	1	8
Tacc2	0.187414	-2.72803	0	0.019	1	8
Zfp617	0.089869	-2.72336	0.011	0.051	1	8
Insyn2b	0.00233732	-2.72129	0.011	0.116	1	8
Setd4	0.0253393	-2.71905	0.011	0.074	1	8
Plscr4	0.104958	-2.70879	0	0.028	1	8
Gtpbp10	0.0350027	-2.70547	0	0.047	1	8
Pebp4	0.254798	-2.70068	0	0.014	1	8
Exoc3l2	0.139656	-2.69486	0	0.023	1	8
Catsperg1	0.347562	-2.68612	0.011	0.028	1	8
Dand5	0.0156772	-2.68469	0	0.06	1	8
E2f6	0.0458667	-2.68274	0	0.042	1	8
Rcan3	0.0156772	-2.68113	0	0.06	1	8
Cd209d	0.187414	-2.67792	0	0.019	1	8
Adcy3	0.0793458	-2.67221	0	0.033	1	8
Ints4	0.0233362	-2.66196	0.011	0.074	1	8
Pgap3	0.104958	-2.66085	0	0.028	1	8
Ccnyl1	0.00858431	-2.65199	0.011	0.093	1	8
Mgst2	0.00705144	-2.651	0	0.074	1	8
Ubox5	0.104958	-2.6502	0	0.028	1	8
Kit	0.184628	-2.6298	0.032	0.07	1	8
Akt1s1	0.0509632	-2.61856	0.022	0.079	1	8
Efnb2	0.728984	-2.61827	0.022	0.028	1	8
Phf11d	0.0204726	-2.61539	0	0.056	1	8
Cdh2	0.139656	-2.61282	0	0.023	1	8
Ttn	0.605943	-2.60725	0.022	0.033	1	8
Fcgr1	0.000161987	-2.60671	0.054	0.233	1	8
Igf2bp3	0.353131	-2.60231	0.011	0.028	1	8
Kbtbd7	0.0914544	-2.59288	0.011	0.051	1	8
Crtam	0.139656	-2.59099	0	0.023	1	8
Prune2	0.254798	-2.58309	0	0.014	1	8
Cma1	0.547806	-2.57986	0.011	0.005	1	8
Srrt	0.000864954	-2.57727	0.075	0.233	1	8
Epha6	0.915183	-2.57133	0.011	0.009	1	8
Prnp	0.187414	-2.56795	0	0.019	1	8
Oas1g	0.0267544	-2.56509	0	0.051	1	8
Zfp653	0.0602353	-2.55547	0	0.037	1	8
Eif2ak2	6.16143e-05	-2.54683	0.075	0.274	1	8
B3galnt2	0.0873897	-2.54653	0.054	0.116	1	8
Gm15155	0.139656	-2.52335	0	0.023	1	8
Rims3	0.254798	-2.52047	0	0.014	1	8
Oas1c	0.0350027	-2.5196	0	0.047	1	8
Dpys	0.187414	-2.51654	0	0.019	1	8
Tsen15	0.0204726	-2.51647	0	0.056	1	8
Cd200r1	0.463537	-2.511	0.022	0.037	1	8
Nme6	0.376535	-2.50877	0.022	0.042	1	8
Ackr1	0.254798	-2.50851	0	0.014	1	8
Map7	0.0156772	-2.49771	0	0.06	1	8
Ly6i	2.77614e-06	-2.49454	0.075	0.326	0.0459451	8
Mier3	0.00301385	-2.48418	0.011	0.112	1	8
Gpn1	0.0237691	-2.47678	0.011	0.074	1	8
H2ac20	0.0356283	-2.47603	0.032	0.102	1	8
Syt1	0.614987	-2.47594	0.011	0.019	1	8
Rundc1	0.820105	-2.47179	0.011	0.014	1	8
Adam23	0.139656	-2.46659	0	0.023	1	8
Eng	0.0539996	-2.46629	0.011	0.06	1	8
Map3k15	0.0555922	-2.46465	0.032	0.093	1	8
2610044O15Rik8	0.0930623	-2.4632	0.011	0.051	1	8
Slc39a3	0.0458667	-2.46076	0	0.042	1	8
Setdb2	4.35527e-06	-2.45957	0.108	0.367	0.0720797	8
Kif9	0.0417042	-2.45733	0.011	0.065	1	8
Pdp1	0.0549696	-2.45317	0.011	0.06	1	8
Slc17a9	0.265806	-2.44416	0.011	0.033	1	8
Ccser1	0.187414	-2.43978	0	0.019	1	8
Tpst1	0.0239255	-2.43897	0.022	0.093	1	8
Ranbp6	0.303537	-2.43626	0.022	0.047	1	8
Zbtb1	0.000265641	-2.43292	0.043	0.209	1	8
Rpusd3	0.187414	-2.42657	0	0.019	1	8
Pde7b	0.00257765	-2.4202	0.086	0.223	1	8
Xaf1	0.000714322	-2.42019	0.054	0.205	1	8
Jam3	0.187414	-2.4162	0	0.019	1	8
P2ry14	0.289968	-2.41344	0.032	0.06	1	8
Wdr83	0.0276505	-2.41275	0.043	0.126	1	8
Rhbdd2	0.939755	-2.4108	0.022	0.023	1	8
Ttc32	0.0150883	-2.40733	0.022	0.102	1	8
Ccno	0.350339	-2.40203	0.011	0.028	1	8
Pcdh17	0.254798	-2.40198	0	0.014	1	8
Katnal1	0.47038	-2.3988	0.011	0.023	1	8
Tmem263	0.61947	-2.39562	0.011	0.019	1	8
Wdr17	0.254798	-2.39137	0	0.014	1	8
Dgcr2	0.154523	-2.39035	0.032	0.074	1	8
Mcm6	0.0204726	-2.38798	0	0.056	1	8
Tirap	0.00499734	-2.38332	0.022	0.121	1	8
Rnf141	0.0344586	-2.38274	0.022	0.088	1	8
Gm7030	0.814584	-2.38134	0.011	0.014	1	8
Col4a1	0.139656	-2.38107	0	0.023	1	8
Ptges	0.0458667	-2.37664	0	0.042	1	8
Dhcr24	0.0602353	-2.37462	0	0.037	1	8
Clec2i	0.00299076	-2.37446	0.075	0.209	1	8
Rhbdl3	0.139656	-2.37434	0	0.023	1	8
Zap70	0.0204726	-2.37055	0	0.056	1	8
Ctc1	0.155409	-2.365	0.011	0.042	1	8
Eif2d	0.0350027	-2.364	0	0.047	1	8
Scn2b	0.254798	-2.36398	0	0.014	1	8
Kcnk12	0.104958	-2.35985	0	0.028	1	8
Nrg1	0.631104	-2.358	0.043	0.056	1	8
Mtx3	0.104958	-2.35655	0	0.028	1	8
Phgdh	0.225446	-2.35443	0.022	0.051	1	8
Raver1	0.61947	-2.3543	0.011	0.019	1	8
Nt5e	0.104958	-2.34991	0	0.028	1	8
Net1	0.466808	-2.34776	0.011	0.023	1	8
Irgm2	0.00456979	-2.34505	0.022	0.126	1	8
Dop1a	0.0165612	-2.34413	0.097	0.2	1	8
Fmnl3	0.0248818	-2.34306	0.011	0.074	1	8
Nrg4	0.104958	-2.34134	0	0.028	1	8
Ahdc1	0.115786	-2.33902	0.032	0.079	1	8
Cep68	0.449149	-2.33561	0.032	0.051	1	8
Map4k5	0.00643874	-2.33512	0.065	0.181	1	8
Wdr25	0.265806	-2.33004	0.011	0.033	1	8
Aptx	0.299993	-2.33	0.032	0.06	1	8
Mmp12	0.139656	-2.32535	0	0.023	1	8
Steap3	0.460773	-2.31917	0.022	0.037	1	8
Cenpj	0.187414	-2.31433	0	0.019	1	8
Stat2	0.00105018	-2.31406	0.086	0.242	1	8
Ifih1	3.45241e-05	-2.3131	0.075	0.288	0.571374	8
Adcy4	0.139656	-2.31309	0	0.023	1	8
Neil1	0.0204726	-2.31088	0	0.056	1	8
Zfp74	0.265806	-2.30834	0.011	0.033	1	8
Il6	0.254798	-2.29906	0	0.014	1	8
Ggact	0.0564517	-2.29338	0.011	0.06	1	8
Swsap1	0.350339	-2.29325	0.011	0.028	1	8
Megf8	0.104958	-2.29111	0	0.028	1	8
Akap11	0.0129218	-2.29022	0.054	0.153	1	8
Camk2b	0.0458667	-2.28405	0	0.042	1	8
Tyms	0.814584	-2.28112	0.011	0.014	1	8
Btbd3	0.139656	-2.28081	0	0.023	1	8
Lonrf3	0.725187	-2.28075	0.022	0.028	1	8
Llgl1	0.373833	-2.26915	0.032	0.056	1	8
Gxylt2	0.463251	-2.26628	0.011	0.023	1	8
Slc2a3	0.0639633	-2.26475	0.043	0.107	1	8
Pkmyt1	0.104958	-2.26451	0	0.028	1	8
Olr1	0.0724537	-2.26353	0.011	0.056	1	8
Fhip2b	0.0215159	-2.26035	0.043	0.13	1	8
Slc25a40	0.0027444	-2.26034	0.022	0.135	1	8
Thop1	0.187414	-2.25902	0	0.019	1	8
Cks1b	0.288175	-2.25869	0.022	0.047	1	8
Pex11b	0.153557	-2.2586	0.032	0.074	1	8
Farp2	0.0458667	-2.25806	0	0.042	1	8
Gtf3c3	0.0280389	-2.25085	0.032	0.107	1	8
Fastkd1	0.1784	-2.24624	0.022	0.056	1	8
2210408I21Rik	0.360379	-2.24487	0.022	0.042	1	8
Trim30c	0.0793458	-2.24368	0	0.033	1	8
Glycam1	0.466808	-2.24334	0.011	0.023	1	8
Zfp729b	0.00719383	-2.24129	0.022	0.116	1	8
Pard3b	0.0793458	-2.23695	0	0.033	1	8
Sdk1	0.187414	-2.23263	0	0.019	1	8
2010315B03Rik	0.00385677	-2.23056	0.032	0.144	1	8
Ankrd33b	0.0619517	-2.22714	0.043	0.107	1	8
Bag4	0.57021	-2.22003	0.054	0.07	1	8
Coil	0.0793458	-2.2165	0	0.033	1	8
Cacnb4	0.0906589	-2.21547	0.011	0.051	1	8
Dnajc16	0.0458667	-2.21398	0	0.042	1	8
Akap7	0.0466179	-2.21351	0.054	0.13	1	8
Cbr1	0.0435814	-2.21322	0.022	0.084	1	8
Rab11fip2	0.0778021	-2.20889	0.032	0.088	1	8
Carns1	0.0458667	-2.2027	0	0.042	1	8
Ly6g5b	0.139656	-2.20101	0	0.023	1	8
Sigirr	0.158431	-2.19326	0.032	0.074	1	8
Rhobtb2	0.356035	-2.19011	0.032	0.056	1	8
Myl4	0.353131	-2.18703	0.011	0.028	1	8
Lcn2	0.291965	-2.187	0.022	0.047	1	8
Sumf2	0.0455031	-2.18581	0.032	0.098	1	8
Il1rap	0.00340752	-2.18474	0.043	0.163	1	8
Naip1	0.47038	-2.1828	0.011	0.023	1	8
Slc13a3	0.350339	-2.18186	0.011	0.028	1	8
Myzap	0.61947	-2.17919	0.011	0.019	1	8
Cxcr5	0.748069	-2.17866	0.022	0.028	1	8
Gins3	0.0793458	-2.17778	0	0.033	1	8
Tsfm	0.099967	-2.17731	0.043	0.098	1	8
Rcn1	0.187414	-2.17334	0	0.019	1	8
Igfbp4	0.373833	-2.16682	0.032	0.056	1	8
Bhlhb9	0.104958	-2.15681	0	0.028	1	8
Rps6ka2	0.282551	-2.15647	0.022	0.047	1	8
Alas1	0.16471	-2.15045	0.086	0.144	1	8
Txnrd3	0.156734	-2.14974	0.011	0.042	1	8
Arhgap27	0.0451905	-2.14364	0.086	0.167	1	8
Rcn3	0.0602353	-2.14345	0	0.037	1	8
Tspan9	0.0705663	-2.14317	0.011	0.056	1	8
Nsg2	0.122785	-2.13958	0.011	0.047	1	8
Zfp607a	0.535393	-2.13889	0.043	0.06	1	8
Selp	0.547806	-2.13298	0.011	0.005	1	8
Prr12	0.044399	-2.13073	0.011	0.065	1	8
Nxf1	0.00627759	-2.13068	0.14	0.279	1	8
Rflnb	0.270177	-2.13008	0.011	0.033	1	8
Herc3	0.00724514	-2.12762	0.032	0.13	1	8
Itpkc	0.138952	-2.12535	0.022	0.06	1	8
Rhoj	0.254798	-2.12389	0	0.014	1	8
Azin2	0.053044	-2.12259	0.011	0.06	1	8
Rigi	0.000777965	-2.12102	0.086	0.247	1	8
Tshz3	0.139656	-2.12009	0	0.023	1	8
Sag	0.350339	-2.11798	0.011	0.028	1	8
Prkn	0.0295172	-2.11038	0.032	0.107	1	8
Mettl15	0.0432266	-2.1033	0.011	0.065	1	8
Dsel	0.139656	-2.10315	0	0.023	1	8
Nbea	0.0793458	-2.10312	0	0.033	1	8
Trim34a	0.0131721	-2.09923	0.043	0.135	1	8
Plekha7	0.254798	-2.09871	0	0.014	1	8
Ifng	0.353131	-2.09713	0.011	0.028	1	8
Rnf125	0.0194807	-2.09632	0.022	0.098	1	8
Zfp287	0.0602353	-2.09619	0	0.037	1	8
Josd1	0.00889773	-2.09404	0.032	0.13	1	8
Smim40	0.0711909	-2.09373	0.011	0.056	1	8
Myo1b	0.908686	-2.09253	0.011	0.009	1	8
Msh6	0.0930623	-2.08746	0.011	0.051	1	8
Mtcp1	0.0793458	-2.08703	0	0.033	1	8
H2-Eb2	0.356035	-2.08477	0.032	0.056	1	8
Asb8	0.0810917	-2.08209	0.043	0.102	1	8
Cited4	0.0930623	-2.08121	0.011	0.051	1	8
C1rl	0.0602353	-2.08033	0	0.037	1	8
Rab37	0.0981596	-2.07731	0.043	0.098	1	8
Snx16	0.0889593	-2.07727	0.022	0.07	1	8
Ccdc171	0.251204	-2.07724	0.075	0.116	1	8
Map1s	0.236683	-2.07316	0.043	0.079	1	8
D130040H23Rik	0.0705663	-2.07139	0.011	0.056	1	8
Zw10	0.0687194	-2.06694	0.011	0.056	1	8
Cfap97d1	0.736599	-2.06511	0.022	0.028	1	8
Borcs5	0.0178163	-2.06207	0.054	0.149	1	8
Ip6k2	0.0546421	-2.05816	0.022	0.079	1	8
Dock9	0.0602353	-2.05775	0	0.037	1	8
Tmem260	0.00999742	-2.05599	0.032	0.13	1	8
Ttyh2	0.466808	-2.05379	0.011	0.023	1	8
Surf2	0.034608	-2.05173	0.032	0.102	1	8
Csf1	0.162117	-2.04941	0.011	0.042	1	8
Spata13	0.00168673	-2.04867	0.172	0.335	1	8
Rragb	0.0793458	-2.04611	0	0.033	1	8
Bud13	0.0542227	-2.04419	0.022	0.079	1	8
Mis12	0.039686	-2.04347	0.032	0.102	1	8
Slc25a26	0.0984976	-2.04335	0.032	0.084	1	8
Ifi205	0.0399065	-2.0418	0.043	0.116	1	8
Ica1	0.254798	-2.03922	0	0.014	1	8
Zfp212	0.0850618	-2.03702	0.022	0.07	1	8
Gvin2	0.0222052	-2.03658	0.065	0.158	1	8
Prrg2	0.0347315	-2.03637	0.022	0.088	1	8
H2-Q10	0.202185	-2.03109	0.011	0.037	1	8
Nudt13	0.186398	-2.02708	0.075	0.121	1	8
Glt1d1	0.2005	-2.02702	0.011	0.037	1	8
Dut	0.0512955	-2.027	0.032	0.098	1	8
Btbd2	0.0152136	-2.02389	0.022	0.102	1	8
Zdhhc6	0.031814	-2.02112	0.054	0.135	1	8
Ncr1	0.367249	-2.01987	0.022	0.042	1	8
Cd55	0.649249	-2.01957	0.043	0.056	1	8
Ap4e1	0.0501744	-2.01947	0.022	0.079	1	8
Dab2	0.918304	-2.018	0.022	0.023	1	8
Kpna6	0.0303276	-2.01631	0.043	0.121	1	8
Rnf14	0.0682352	-2.01537	0.086	0.158	1	8
Gpam	0.139656	-2.0122	0	0.023	1	8
Cep95	0.0290882	-2.00989	0.032	0.107	1	8
Padi4	0.103132	-2.00566	0.032	0.084	1	8
Tbc1d24	0.297714	-2.00481	0.022	0.047	1	8
Rwdd3	0.254798	-2.00407	0	0.014	1	8
Fen1	0.0687194	-1.99993	0.011	0.056	1	8
Zfp46	0.274596	-1.99983	0.011	0.033	1	8
Zc3h3	0.137061	-1.9995	0.065	0.116	1	8
Pon3	0.0793458	-1.99512	0	0.033	1	8
Prkca	0.136036	-1.99404	0.086	0.144	1	8
Cdkl3	0.104958	-1.99291	0	0.028	1	8
Megf9	0.0153039	-1.99156	0.075	0.177	1	8
St14	0.187414	-1.99112	0	0.019	1	8
Fcrl1	0.0331768	-1.99039	0.065	0.153	1	8
Rufy4	0.187414	-1.98856	0	0.019	1	8
Pcgf6	0.0350027	-1.98816	0	0.047	1	8
Dhx29	0.169653	-1.98781	0.075	0.13	1	8
Kdm4d	0.117615	-1.98469	0.011	0.047	1	8
H2-Q5	0.100463	-1.98379	0.032	0.084	1	8
Mtrr	0.27238	-1.9837	0.011	0.033	1	8
Mcm2	0.270177	-1.98254	0.011	0.033	1	8
Pex26	0.104958	-1.98219	0	0.028	1	8
Cabcoco1	0.187414	-1.982	0	0.019	1	8
Rrp8	0.0662823	-1.98163	0.054	0.121	1	8
Lrrc41	0.0133027	-1.98036	0.032	0.121	1	8
5430403G16Rik	0.378879	-1.97864	0.022	0.042	1	8
D2hgdh	0.0350027	-1.97773	0	0.047	1	8
Eif2b5	0.113901	-1.97446	0.065	0.126	1	8
Txk	0.0841296	-1.97354	0.075	0.144	1	8
Plpp6	0.10246	-1.97247	0.032	0.084	1	8
Plcxd2	0.097563	-1.96991	0.043	0.098	1	8
Pced1a	0.896331	-1.96986	0.054	0.056	1	8
Slc1a2	0.801491	-1.96716	0.032	0.037	1	8
Tha1	0.471883	-1.96669	0.022	0.037	1	8
Or5v1b	0.466808	-1.96355	0.011	0.023	1	8
Klhl8	0.0602353	-1.96292	0	0.037	1	8
Amy1	0.187414	-1.96007	0	0.019	1	8
Selenoo	0.05546	-1.95823	0.011	0.06	1	8
Cry2	0.545786	-1.95781	0.032	0.047	1	8
Kif1c	0.490861	-1.95578	0.054	0.074	1	8
Zfp458	0.187414	-1.95504	0	0.019	1	8
Nprl2	0.0458667	-1.95438	0	0.042	1	8
Zfp691	0.915183	-1.95126	0.011	0.009	1	8
Paqr4	0.254798	-1.95017	0	0.014	1	8
Prag1	0.0793458	-1.9483	0	0.033	1	8
Nelfa	0.02636	-1.94648	0.022	0.093	1	8
Bpifb3	0.39575	-1.9455	0.022	0.009	1	8
Crebl2	0.199817	-1.94232	0.032	0.07	1	8
Phf11a	0.0602353	-1.93893	0	0.037	1	8
Rasl2-9	0.908686	-1.93826	0.011	0.009	1	8
Senp8	0.0458667	-1.93471	0	0.042	1	8
Spef2	0.623968	-1.93414	0.011	0.019	1	8
Mrrf	0.486855	-1.93096	0.054	0.074	1	8
Ear2	0.000368484	-1.92889	0.172	0.353	1	8
Cabyr	0.92259	-1.92814	0.022	0.023	1	8
Pi4k2b	0.0571728	-1.9269	0.032	0.093	1	8
Elmo3	0.187414	-1.92627	0	0.019	1	8
Ccdc93	0.381664	-1.92335	0.086	0.121	1	8
Cgas	0.0533919	-1.92309	0.022	0.079	1	8
Cep192	0.00118721	-1.92118	0.043	0.186	1	8
Ubr1	0.00265387	-1.92046	0.075	0.219	1	8
Rad51d	0.191529	-1.91984	0.032	0.07	1	8
Fbxo10	0.12384	-1.91829	0.011	0.047	1	8
Rdh12	0.104958	-1.91604	0	0.028	1	8
Uhrf1bp1	0.104958	-1.90922	0	0.028	1	8
Urgcp	0.499498	-1.90871	0.097	0.121	1	8
Ankra2	0.10865	-1.90768	0.075	0.14	1	8
Slc25a12	0.000624531	-1.90676	0.086	0.26	1	8
Zfp850	0.0793458	-1.90597	0	0.033	1	8
Hsh2d	0.0950739	-1.90363	0.022	0.07	1	8
Slc28a2	0.0284546	-1.90351	0.032	0.107	1	8
Oaf	0.254798	-1.90117	0	0.014	1	8
Cox18	0.0428417	-1.90081	0.011	0.065	1	8
Slc16a14	0.254798	-1.89623	0	0.014	1	8
Ubxn2b	0.112858	-1.89454	0.022	0.065	1	8
Tgtp2	0.104958	-1.89428	0	0.028	1	8
Cadm3	0.0746984	-1.8933	0.032	0.088	1	8
Mmd	0.627369	-1.8923	0.097	0.112	1	8
Ift88	0.355937	-1.89198	0.011	0.028	1	8
Hectd2	0.3742	-1.8915	0.022	0.042	1	8
Dgat1	0.670307	-1.8903	0.097	0.112	1	8
4931406C07Rik	0.235422	-1.88946	0.043	0.079	1	8
Ttf1	0.0142158	-1.88675	0.054	0.153	1	8
Tbc1d12	0.0249151	-1.88653	0.022	0.093	1	8
Hmga1	0.145726	-1.88521	0.065	0.116	1	8
Nthl1	0.139656	-1.88476	0	0.023	1	8
Arnt2	0.355937	-1.88372	0.011	0.028	1	8
Lrif1	0.0192436	-1.88247	0.097	0.2	1	8
Rnf135	0.122175	-1.88154	0.043	0.093	1	8
H4c4	0.0216221	-1.87882	0.14	0.26	1	8
Arg2	0.219906	-1.87764	0.065	0.107	1	8
Cdc25a	0.229809	-1.87729	0.032	0.065	1	8
Trmt5	0.104958	-1.87509	0	0.028	1	8
Cep290	0.079929	-1.87438	0.032	0.088	1	8
Tbc1d32	0.155409	-1.87385	0.011	0.042	1	8
Fech	0.194653	-1.87322	0.043	0.084	1	8
Zfp236	0.0404922	-1.87094	0.086	0.177	1	8
Fabp12	0.0669113	-1.86938	0.022	0.074	1	8
Helz2	0.00763389	-1.86881	0.022	0.116	1	8
Mapre3	0.91402	-1.8674	0.022	0.023	1	8
Helq	0.0793458	-1.86682	0	0.033	1	8
Kics2	0.122785	-1.86564	0.011	0.047	1	8
Med24	0.139953	-1.86524	0.022	0.06	1	8
H2ac18	0.0918528	-1.85938	0.097	0.172	1	8
Ighmbp2	0.350339	-1.85678	0.011	0.028	1	8
Dhx32	0.471883	-1.8567	0.022	0.037	1	8
Zfp707	0.187414	-1.85662	0	0.019	1	8
4933434E20Rik	0.0134705	-1.85418	0.108	0.219	1	8
Ror1	0.254798	-1.85307	0	0.014	1	8
Gm45717	0.0793458	-1.84653	0	0.033	1	8
Dpyd	0.463251	-1.84546	0.011	0.023	1	8
Ramp3	0.905461	-1.84436	0.022	0.023	1	8
Mocos	0.496902	-1.84414	0.054	0.074	1	8
Cyb5d2	0.0420804	-1.84286	0.011	0.065	1	8
Ltf	0.254798	-1.83989	0	0.014	1	8
Rubcnl	0.00278957	-1.83916	0.065	0.2	1	8
Galnt7	0.0100793	-1.83724	0.14	0.265	1	8
Slc35f5	0.0869929	-1.83718	0.022	0.07	1	8
Slfn1	4.99584e-05	-1.83566	0.043	0.237	0.826811	8
Tmem150c	0.254798	-1.8352	0	0.014	1	8
Bap1	0.0344586	-1.83356	0.022	0.088	1	8
Cep76	0.139656	-1.83291	0	0.023	1	8
Zfp770	0.156734	-1.832	0.011	0.042	1	8
Rnf181	0.0271092	-1.8315	0.118	0.223	1	8
Cyth3	0.00453416	-1.8311	0.194	0.33	1	8
Tyw1	0.0841598	-1.83108	0.043	0.102	1	8
Gm8797	0.828411	-1.82898	0.032	0.037	1	8
Bcl9	0.05546	-1.82818	0.011	0.06	1	8
Ankrd39	0.0204856	-1.82576	0.011	0.079	1	8
Gins1	0.0938747	-1.82346	0.011	0.051	1	8
Lamb3	0.128833	-1.82091	0.043	0.093	1	8
Slc6a20a	0.595972	-1.81889	0.022	0.033	1	8
Bsdc1	0.0057882	-1.81666	0.086	0.219	1	8
Cd200r4	0.355937	-1.81638	0.011	0.028	1	8
Cep164	0.06257	-1.81562	0.032	0.093	1	8
Amot	0.347562	-1.8156	0.011	0.028	1	8
Poli	0.139656	-1.81557	0	0.023	1	8
Bend4	0.0350027	-1.81531	0	0.047	1	8
Mapk1ip1	0.24435	-1.81431	0.043	0.079	1	8
Spout1	0.548449	-1.81372	0.032	0.047	1	8
Mrm1	0.119593	-1.8114	0.022	0.065	1	8
Rprd2	0.000589101	-1.80914	0.118	0.302	1	8
Adgrg5	0.0602353	-1.80673	0	0.037	1	8
Yipf2	0.376535	-1.80189	0.022	0.042	1	8
Gimap7	0.0930623	-1.79856	0.011	0.051	1	8
Rab2b	0.0249151	-1.79647	0.022	0.093	1	8
Trim17	0.371874	-1.79534	0.022	0.042	1	8
Pus7	0.853237	-1.79264	0.043	0.037	1	8
Nr6a1	0.197422	-1.79201	0.032	0.07	1	8
Farp1	0.117615	-1.79074	0.011	0.047	1	8
Rfesd	0.192697	-1.79041	0.032	0.07	1	8
Guf1	0.0711909	-1.78915	0.011	0.056	1	8
Nck2	0.0491038	-1.78914	0.054	0.13	1	8
Tmem29	0.182075	-1.78431	0.043	0.084	1	8
Polr3e	0.337466	-1.78134	0.043	0.07	1	8
Usp45	0.0135352	-1.77769	0.086	0.2	1	8
Lekr1	0.187414	-1.77636	0	0.019	1	8
Pdik1l	0.0711909	-1.77599	0.011	0.056	1	8
Naa30	0.105267	-1.77583	0.065	0.126	1	8
Gm8369	0.186635	-1.77524	0.065	0.112	1	8
Wdtc1	0.168136	-1.77395	0.075	0.126	1	8
Zbtb40	0.234165	-1.77364	0.043	0.079	1	8
Zbtb16	0.0379251	-1.77297	0.086	0.177	1	8
Map3k13	0.0260393	-1.77233	0.011	0.074	1	8
Icos	0.0436145	-1.77135	0.011	0.065	1	8
Trim30b	0.0348607	-1.77128	0.032	0.102	1	8
Tmem237	0.265806	-1.76978	0.011	0.033	1	8
Ercc6	0.0209612	-1.76878	0.022	0.098	1	8
E130311K13Rik	0.104958	-1.76819	0	0.028	1	8
Dtx3l	0.00183266	-1.76423	0.108	0.26	1	8
Dync2h1	0.0276505	-1.76265	0.043	0.126	1	8
Fam219a	0.0484842	-1.76108	0.075	0.153	1	8
Asic2	0.820105	-1.76046	0.011	0.014	1	8
Letmd1	0.288204	-1.7604	0.043	0.074	1	8
Psmf1	0.0575738	-1.75963	0.032	0.093	1	8
Rpgr	0.547806	-1.75868	0.011	0.005	1	8
Slfn9	0.113683	-1.75829	0.022	0.065	1	8
Slc25a16	0.00660889	-1.758	0.032	0.135	1	8
Grk4	0.236346	-1.75744	0.022	0.051	1	8
Stra6l	0.187414	-1.75707	0	0.019	1	8
Acot11	0.201022	-1.75644	0.032	0.07	1	8
Cib3	0.139656	-1.75621	0	0.023	1	8
Wfdc21	0.463251	-1.75548	0.011	0.023	1	8
Chst11	0.0450154	-1.75488	0.075	0.163	1	8
Hr	0.908686	-1.75209	0.011	0.009	1	8
Pi4kb	0.0368849	-1.75113	0.086	0.181	1	8
Abraxas1	0.860535	-1.75045	0.043	0.047	1	8
H2ac22	0.104958	-1.7504	0	0.028	1	8
Clnk	0.068979	-1.74988	0.022	0.074	1	8
Ercc4	0.0200649	-1.74984	0.032	0.116	1	8
Acsbg3	0.187414	-1.74684	0	0.019	1	8
Mmut	0.064313	-1.74421	0.032	0.093	1	8
Chil1	0.104958	-1.7437	0	0.028	1	8
Zdbf2	0.254798	-1.74113	0	0.014	1	8
Dstyk	0.0055047	-1.73927	0.14	0.279	1	8
Lhpp	0.301588	-1.73889	0.022	0.047	1	8
Pik3r2	0.0546929	-1.73686	0.043	0.112	1	8
Tmem273	0.350339	-1.73616	0.011	0.028	1	8
Qrfp	0.139656	-1.73583	0	0.023	1	8
Gkap1	0.120696	-1.73509	0.011	0.047	1	8
Wfs1	0.820105	-1.73439	0.011	0.014	1	8
Asb1	0.0793458	-1.73083	0	0.033	1	8
Cd101	0.277962	-1.7308	0.043	0.074	1	8
Camsap1	0.0914544	-1.72964	0.011	0.051	1	8
Arhgap22	0.119593	-1.72897	0.022	0.065	1	8
Irf2bpl	0.383497	-1.72847	0.065	0.093	1	8
Nutf2	0.350339	-1.72795	0.011	0.028	1	8
Dpf3	0.139656	-1.72634	0	0.023	1	8
Zfp719	0.0906589	-1.72525	0.011	0.051	1	8
Bbs2	0.471883	-1.72259	0.022	0.037	1	8
Taf4b	0.0372415	-1.72208	0.108	0.2	1	8
Cyp4f37	0.254798	-1.7212	0	0.014	1	8
Klhl35	0.820105	-1.7197	0.011	0.014	1	8
Sugp1	0.0946232	-1.71828	0.043	0.098	1	8
Ei24	0.0135919	-1.7174	0.075	0.181	1	8
Tada2a	0.828411	-1.71697	0.032	0.037	1	8
Enah	0.646664	-1.71528	0.022	0.014	1	8
Ccnd2	0.00527662	-1.71484	0.043	0.158	1	8
Trim14	0.00258906	-1.71389	0.086	0.233	1	8
Insl6	0.642097	-1.71345	0.022	0.014	1	8
Dolk	0.286292	-1.71323	0.022	0.047	1	8
Slc12a3	0.820105	-1.71244	0.011	0.014	1	8
Gm10130	0.207301	-1.71174	0.011	0.037	1	8
Vegfc	0.128833	-1.7063	0.043	0.093	1	8
Sox5	0.595972	-1.70591	0.022	0.033	1	8
Zfp296	0.1784	-1.70507	0.022	0.056	1	8
Naa40	0.0240782	-1.70399	0.032	0.112	1	8
Kalrn	0.0793458	-1.70215	0	0.033	1	8
Ckap2	0.187414	-1.7017	0	0.019	1	8
Irak3	0.0159996	-1.69976	0.161	0.284	1	8
Il10	0.614987	-1.69963	0.011	0.019	1	8
Tmem209	0.0889593	-1.69809	0.022	0.07	1	8
Usp30	0.162117	-1.69787	0.011	0.042	1	8
Armc7	0.0614831	-1.69782	0.097	0.181	1	8
Klra17	0.187414	-1.6978	0	0.019	1	8
Cacnb1	0.139656	-1.69757	0	0.023	1	8
Tbc1d10c	0.0209818	-1.6972	0.065	0.158	1	8
C87436	0.00890389	-1.69508	0.075	0.195	1	8
Htr1f	0.139656	-1.69399	0	0.023	1	8
Arv1	0.0549696	-1.69273	0.011	0.06	1	8
Dpy19l3	0.0458667	-1.68944	0	0.042	1	8
Ccr1	0.331212	-1.68827	0.065	0.098	1	8
Arhgef28	0.187414	-1.68545	0	0.019	1	8
Large1	0.0272488	-1.68525	0.054	0.14	1	8
Fbf1	0.0793458	-1.68373	0	0.033	1	8
Rptor	0.00347819	-1.68181	0.183	0.335	1	8
H2-Ob	0.0732719	-1.67818	0.022	0.074	1	8
Atp8a2	0.139656	-1.67555	0	0.023	1	8
Ddx59	0.3742	-1.67534	0.022	0.042	1	8
Trim56	0.00862394	-1.67511	0.043	0.149	1	8
H2-Q6	3.10167e-05	-1.67376	0.086	0.312	0.513326	8
Efcab11	0.142326	-1.67317	0.032	0.074	1	8
Rnf103	0.0285043	-1.67256	0.075	0.167	1	8
Dynlt2a2	0.137823	-1.67179	0.054	0.107	1	8
Per3	0.26364	-1.67172	0.011	0.033	1	8
Zfp513	0.149207	-1.67147	0.022	0.06	1	8
Rbm43	0.00366877	-1.67004	0.022	0.13	1	8
Pigb	0.124902	-1.66441	0.011	0.047	1	8
Il18r1	0.0112707	-1.66189	0.043	0.144	1	8
Xxylt1	0.0235493	-1.66173	0.032	0.112	1	8
Zscan18	0.614987	-1.66169	0.011	0.019	1	8
Cped1	0.463251	-1.66133	0.011	0.023	1	8
Armc6	0.139656	-1.65951	0	0.023	1	8
Cd8b1	0.254798	-1.65942	0	0.014	1	8
Klhl36	0.776008	-1.65871	0.054	0.06	1	8
Btla	0.02709	-1.65761	0.043	0.126	1	8
Gm49510	0.187414	-1.65674	0	0.019	1	8
Mss51	0.139656	-1.65567	0	0.023	1	8
Zfp128	0.254798	-1.65533	0	0.014	1	8
Cited2	0.0521251	-1.65494	0.226	0.335	1	8
Elp6	0.61947	-1.6521	0.011	0.019	1	8
Pdcd11	0.0803446	-1.6502	0.086	0.158	1	8
Tlr8	0.0100766	-1.64989	0.075	0.191	1	8
Abcb4	0.915183	-1.64902	0.011	0.009	1	8
Polh	0.177157	-1.64694	0.022	0.056	1	8
Npas3	0.187414	-1.64597	0	0.019	1	8
9930022D16Rik	0.46631	-1.64415	0.022	0.037	1	8
Rsph9	0.187414	-1.64393	0	0.019	1	8
Vps37a	0.218793	-1.64322	0.118	0.172	1	8
Cep152	0.101791	-1.64233	0.032	0.084	1	8
Obi1	0.109605	-1.6378	0.022	0.065	1	8
Siglec1	0.187414	-1.63728	0	0.019	1	8
Itpr3	0.0447958	-1.63414	0.011	0.065	1	8
Zfp33b	0.112858	-1.63409	0.022	0.065	1	8
Tmem214	0.359868	-1.63301	0.075	0.107	1	8
Shc4	0.139656	-1.63216	0	0.023	1	8
Bag2	0.547806	-1.63152	0.011	0.005	1	8
Fgf13	0.124364	-1.631	0.043	0.093	1	8
Dennd2d	0.0196109	-1.62998	0.043	0.135	1	8
Pyroxd1	0.0984976	-1.62937	0.032	0.084	1	8
Xylt2	0.0564517	-1.62791	0.011	0.06	1	8
Atad5	0.0417099	-1.62779	0.032	0.102	1	8
Ncapd3	0.281333	-1.62756	0.065	0.102	1	8
Crocc	0.547806	-1.62654	0.011	0.005	1	8
Pnpo	0.0329019	-1.62649	0.043	0.121	1	8
Tgfbr3	0.039686	-1.62588	0.032	0.102	1	8
Cenpk	0.350339	-1.62563	0.011	0.028	1	8
Gins2	0.104958	-1.62483	0	0.028	1	8
Bahd1	0.0525718	-1.62403	0.022	0.079	1	8
Rad9b	0.139656	-1.62353	0	0.023	1	8
Bloc1s5	0.183435	-1.6228	0.022	0.056	1	8
Ccr6	0.104958	-1.622	0	0.028	1	8
Dis3l	0.219381	-1.61827	0.022	0.051	1	8
Fut4	0.0850618	-1.6159	0.022	0.07	1	8
Prr5l	0.00739143	-1.61296	0.183	0.316	1	8
Tnfsf13b	0.0754989	-1.61249	0.022	0.074	1	8
Syn3	0.187414	-1.61215	0	0.019	1	8
Xpc	0.101801	-1.61129	0.043	0.098	1	8
Mrps5	0.149953	-1.60952	0.075	0.126	1	8
Fcgr4	0.138144	-1.60521	0.043	0.093	1	8
Elovl6	0.0209612	-1.60243	0.022	0.098	1	8
Rttn	0.38666	-1.60172	0.065	0.093	1	8
Acot9	0.0227054	-1.60109	0.194	0.302	1	8
A530064D06Rik	0.121737	-1.60101	0.011	0.047	1	8
Wdr41	0.00664856	-1.60092	0.086	0.214	1	8
Zfp251	0.104958	-1.59953	0	0.028	1	8
Ggcx	0.609284	-1.59791	0.022	0.033	1	8
Rabl2	0.610517	-1.59784	0.011	0.019	1	8
Prmt5	0.0724537	-1.59546	0.011	0.056	1	8
Ptges2	0.736648	-1.59535	0.043	0.051	1	8
H2bc12	0.547806	-1.59452	0.011	0.005	1	8
Mpv17l	0.154094	-1.59424	0.011	0.042	1	8
Cyb5r3	0.0119676	-1.59328	0.151	0.27	1	8
Ppp1r1c	0.814584	-1.59209	0.011	0.014	1	8
Sephs1	0.0319757	-1.5915	0.032	0.107	1	8
Camkk2	6.40516e-06	-1.59016	0.29	0.567	0.106005	8
Acpp	0.0355615	-1.58762	0.022	0.088	1	8
1700109H08Rik	0.111222	-1.58536	0.022	0.065	1	8
Tamm41	0.274596	-1.58474	0.011	0.033	1	8
Zfp592	0.0656149	-1.58358	0.172	0.251	1	8
Tti2	0.303537	-1.58351	0.022	0.047	1	8
Spice1	0.81829	-1.58097	0.032	0.037	1	8
Map2k6	0.0241919	-1.58094	0.043	0.13	1	8
Serpinb6b	0.160758	-1.57735	0.011	0.042	1	8
Plscr1	0.520377	-1.57652	0.075	0.098	1	8
Ly6c2	0.000158214	-1.5755	0.215	0.428	1	8
Bcdin3d	0.24113	-1.57527	0.022	0.051	1	8
Rasgrf2	0.0272177	-1.573	0.022	0.093	1	8
Ccdc77	0.11884	-1.57255	0.032	0.079	1	8
Zfyve19	0.662479	-1.57149	0.032	0.042	1	8
Caprin2	0.47038	-1.56927	0.011	0.023	1	8
Rmi1	0.352584	-1.56904	0.054	0.084	1	8
Exd2	0.383827	-1.56893	0.054	0.079	1	8
Tmem35b	0.0793458	-1.56773	0	0.033	1	8
Bltp2	0.00451393	-1.5676	0.097	0.242	1	8
Arhgap39	0.0211057	-1.5674	0.204	0.316	1	8
Atg2b	0.0542043	-1.56713	0.097	0.181	1	8
Cdh1	0.187414	-1.56637	0	0.019	1	8
Pira13	0.202185	-1.56537	0.011	0.037	1	8
Acad9	0.0719967	-1.56425	0.054	0.121	1	8
Uba6	0.0158983	-1.56267	0.118	0.233	1	8
Ttll3	0.184628	-1.56236	0.032	0.07	1	8
Ecd	0.208911	-1.5622	0.054	0.093	1	8
Gan	0.0281429	-1.56171	0.054	0.14	1	8
Eya2	0.0372723	-1.55753	0.022	0.088	1	8
Lyar	0.00956878	-1.5573	0.054	0.163	1	8
Taf5	0.403223	-1.55561	0.086	0.116	1	8
H2bc3	0.744239	-1.55391	0.022	0.028	1	8
Ncdn	0.242739	-1.55276	0.022	0.051	1	8
Trim69	0.104958	-1.55223	0	0.028	1	8
Tatdn2	0.0705108	-1.55223	0.097	0.177	1	8
Pecam1	0.0031007	-1.55186	0.118	0.27	1	8
Fhod1	0.0373384	-1.5488	0.118	0.219	1	8
Etfbkmt	0.0590565	-1.54839	0.043	0.112	1	8
Nif3l1	0.146072	-1.54724	0.022	0.06	1	8
Tnfrsf23	0.0850618	-1.5472	0.022	0.07	1	8
Gm20431	0.533077	-1.546	0.043	0.06	1	8
Gab3	0.125674	-1.5443	0.14	0.2	1	8
Dnmt3b	0.139656	-1.54422	0	0.023	1	8
Atg4d	0.178653	-1.54415	0.075	0.126	1	8
Cd96	0.141419	-1.54345	0.032	0.074	1	8
Zscan22	0.249506	-1.54337	0.032	0.065	1	8
Pemt	0.139656	-1.54303	0	0.023	1	8
Phf7	0.441545	-1.54287	0.043	0.065	1	8
Pde5a	0.288175	-1.54207	0.022	0.047	1	8
Klk1b27	0.547806	-1.54167	0.011	0.005	1	8
Cdk16	0.165933	-1.54091	0.065	0.116	1	8
Tspoap1	0.187414	-1.54055	0	0.019	1	8
Rgs3	0.142933	-1.53892	0.14	0.205	1	8
Prepl	0.0869929	-1.5367	0.022	0.07	1	8
Zer1	0.190408	-1.53652	0.054	0.098	1	8
Abcb1a	0.551747	-1.53636	0.043	0.06	1	8
Zfp143	0.0440667	-1.53462	0.043	0.116	1	8
L3mbtl2	0.151326	-1.53203	0.022	0.06	1	8
Slco3a1	0.0120635	-1.53046	0.108	0.228	1	8
Zfp366	0.185992	-1.53035	0.022	0.056	1	8
Plac8	9.60547e-08	-1.52974	0.505	0.712	0.00158971	8
Cops7a	0.0492961	-1.52944	0.043	0.112	1	8
Mcmdc2	0.614987	-1.52862	0.011	0.019	1	8
Rab28	0.0674649	-1.52706	0.065	0.135	1	8
Crkl	0.0272757	-1.52656	0.043	0.126	1	8
Prelid3a	0.614987	-1.52489	0.011	0.019	1	8
Hes7	0.187414	-1.52462	0	0.019	1	8
Zfp160	0.163872	-1.5245	0.054	0.102	1	8
Trim41	0.188449	-1.52381	0.065	0.112	1	8
Ccdc192	0.160758	-1.52262	0.011	0.042	1	8
Ints2	0.120696	-1.51974	0.011	0.047	1	8
Ube2e2	0.0896226	-1.51943	0.022	0.07	1	8
Itk	0.0396119	-1.51867	0.065	0.149	1	8
Mlh3	0.120733	-1.51832	0.043	0.093	1	8
Il17a	0.908686	-1.51718	0.011	0.009	1	8
Klrb1f	0.033385	-1.51681	0.022	0.088	1	8
Gbp9	0.217177	-1.51652	0.086	0.135	1	8
Katnb1	0.187414	-1.51593	0	0.019	1	8
Tipin	0.292589	-1.51541	0.054	0.088	1	8
Asb7	0.413597	-1.51481	0.043	0.065	1	8
Chst7	0.139656	-1.51302	0	0.023	1	8
Myo1h	0.207301	-1.51288	0.011	0.037	1	8
Adam12	0.205585	-1.51284	0.011	0.037	1	8
Riox1	0.246622	-1.51137	0.032	0.065	1	8
Sh2b1	0.0826539	-1.51038	0.032	0.088	1	8
Galk2	0.040244	-1.51019	0.075	0.163	1	8
Slc6a13	0.0793458	-1.50884	0	0.033	1	8
Pola2	0.820846	-1.50775	0.065	0.07	1	8
Ankrd55	0.61947	-1.50766	0.011	0.019	1	8
Zbtb34	0.132651	-1.50525	0.043	0.093	1	8
Vdr	0.466808	-1.50466	0.011	0.023	1	8
Plpp2	0.463152	-1.50379	0.032	0.051	1	8
Plag1	0.119662	-1.50363	0.011	0.047	1	8
Tgm2	0.524211	-1.5036	0.194	0.219	1	8
Kif21b	0.00893869	-1.50317	0.065	0.177	1	8
Kif16b	0.0599052	-1.50277	0.086	0.167	1	8
Lsm14b	0.333515	-1.50181	0.086	0.121	1	8
Cetn4	0.254798	-1.50179	0	0.014	1	8
Hcfc1	0.064487	-1.50125	0.065	0.135	1	8
Psmg1	0.483689	-1.50125	0.065	0.088	1	8
Lnpk	0.119563	-1.50017	0.054	0.107	1	8
Npat	0.100121	-1.49666	0.075	0.144	1	8
Scml4	0.166531	-1.49568	0.075	0.13	1	8
1700102P08Rik	0.254798	-1.49497	0	0.014	1	8
Cdc27	0.420134	-1.49479	0.118	0.153	1	8
Aldh16a1	0.337371	-1.49365	0.086	0.121	1	8
Dhrs11	0.304092	-1.49341	0.075	0.112	1	8
Magi3	0.626789	-1.49257	0.086	0.102	1	8
Klk8	0.0159675	-1.49256	0.011	0.084	1	8
Scrn2	0.0793458	-1.49189	0	0.033	1	8
Rhou	0.371874	-1.49166	0.022	0.042	1	8
Ttf2	0.989136	-1.49059	0.032	0.033	1	8
Endod1	0.0952902	-1.48969	0.032	0.084	1	8
Tmem70	0.0672939	-1.48911	0.043	0.107	1	8
Rab36	0.122785	-1.4889	0.011	0.047	1	8
Nxn	0.406365	-1.48806	0.086	0.112	1	8
Kctd9	0.23163	-1.48795	0.022	0.051	1	8
Plxdc1	0.0717432	-1.48746	0.065	0.135	1	8
Ampd3	0.00860612	-1.48663	0.054	0.167	1	8
Ptch1	0.14401	-1.48658	0.022	0.06	1	8
Rsbn1	0.0317501	-1.48594	0.129	0.237	1	8
Zfp825	0.191184	-1.48484	0.022	0.056	1	8
Ifi209	0.000446797	-1.48473	0.183	0.367	1	8
Mosmo	0.0488395	-1.48472	0.032	0.098	1	8
Pdzd2	0.637544	-1.48418	0.022	0.014	1	8
Vamp2	0.280654	-1.48254	0.118	0.163	1	8
Usp48	0.000535008	-1.48216	0.129	0.321	1	8
Nup133	0.918657	-1.48004	0.054	0.056	1	8
Tacstd2	0.623968	-1.47996	0.011	0.019	1	8
Esrra	0.0249932	-1.47989	0.065	0.158	1	8
Gramd1b	0.0248565	-1.47946	0.151	0.26	1	8
Mmp19	0.350339	-1.47868	0.011	0.028	1	8
3300002I08Rik	0.0882999	-1.4766	0.022	0.07	1	8
Bmf	0.0762374	-1.47636	0.032	0.088	1	8
Lrwd1	0.258944	-1.47566	0.097	0.14	1	8
L3mbtl4	0.254798	-1.47555	0	0.014	1	8
Nln	0.689102	-1.47552	0.14	0.153	1	8
Agbl5	0.139656	-1.47465	0	0.023	1	8
Arfgef3	0.187414	-1.47324	0	0.019	1	8
Garnl3	0.614987	-1.47159	0.011	0.019	1	8
Mad2l1	0.91402	-1.47084	0.022	0.023	1	8
Golm2	0.908686	-1.47072	0.011	0.009	1	8
Slc35a2	0.0700323	-1.4704	0.022	0.074	1	8
Actn2	0.350339	-1.46939	0.011	0.028	1	8
Ago1	0.06257	-1.46914	0.032	0.093	1	8
Sec16a	0.0266736	-1.46912	0.108	0.214	1	8
Gm45692	0.254798	-1.46714	0	0.014	1	8
Get4	0.0375132	-1.46638	0.054	0.135	1	8
Usp53	0.0622189	-1.46411	0.065	0.14	1	8
Hoxb4	0.156734	-1.46325	0.011	0.042	1	8
Ift172	0.175428	-1.4627	0.097	0.149	1	8
Ifi204	0.00101122	-1.46152	0.183	0.372	1	8
Sp100	7.77166e-06	-1.4609	0.333	0.567	0.128621	8
Hjurp	0.208629	-1.45884	0.097	0.144	1	8
Padi2	0.0646164	-1.45752	0.151	0.242	1	8
Apoc1	0.436476	-1.45682	0.075	0.051	1	8
Rrm2b	0.0703243	-1.45624	0.054	0.121	1	8
Ank2	0.466808	-1.45381	0.011	0.023	1	8
Dus2	0.142987	-1.45312	0.022	0.06	1	8
Fxyd6	0.547806	-1.45234	0.011	0.005	1	8
2010109A12Rik	0.473967	-1.45113	0.011	0.023	1	8
Plce1	0.254798	-1.45027	0	0.014	1	8
Syt11	0.230073	-1.4484	0.022	0.051	1	8
Fanca	0.887916	-1.44808	0.043	0.047	1	8
Kdm3b	0.0105255	-1.44784	0.226	0.358	1	8
Pcbp3	0.367249	-1.44734	0.022	0.042	1	8
Snhg4	0.35562	-1.44668	0.075	0.107	1	8
Glis3	0.157735	-1.44442	0.043	0.088	1	8
Zbtb5	0.120456	-1.44387	0.022	0.065	1	8
Mctp2	0.125656	-1.4437	0.054	0.107	1	8
Sdk2	0.915183	-1.4428	0.011	0.009	1	8
Mettl4	0.576256	-1.44236	0.022	0.033	1	8
Racgap1	0.45379	-1.4415	0.032	0.051	1	8
Plrg1	0.431441	-1.44078	0.043	0.065	1	8
Cubn	0.435467	-1.4404	0.043	0.065	1	8
St6galnac3	0.0302917	-1.43974	0.097	0.191	1	8
9130019O22Rik	0.187414	-1.43854	0	0.019	1	8
Fadd	0.379415	-1.43598	0.043	0.07	1	8
Naprt	0.156734	-1.43557	0.011	0.042	1	8
Pex10	0.104958	-1.43388	0	0.028	1	8
Gimap3	0.155581	-1.43385	0.065	0.116	1	8
Slc2a1	0.0448639	-1.43351	0.118	0.209	1	8
Kif3c	0.104958	-1.43342	0	0.028	1	8
Gpank1	0.0387035	-1.43315	0.054	0.135	1	8
Zscan2	0.139656	-1.43265	0	0.023	1	8
Rida	0.158067	-1.43082	0.011	0.042	1	8
Tma16	0.246271	-1.4305	0.054	0.093	1	8
Gmds	0.116131	-1.43014	0.075	0.135	1	8
Tnfrsf13c	0.254798	-1.42948	0	0.014	1	8
Haus7	0.253876	-1.42926	0.032	0.065	1	8
Abtb3	0.0955165	-1.42867	0.011	0.051	1	8
Zc3h14	0.121562	-1.42859	0.097	0.163	1	8
Mocs3	0.358757	-1.42707	0.011	0.028	1	8
Alad	0.119662	-1.42671	0.011	0.047	1	8
Kbtbd2	0.161925	-1.42651	0.129	0.191	1	8
Thap11	0.0323832	-1.42628	0.054	0.14	1	8
Dcaf5	0.0184978	-1.42621	0.129	0.242	1	8
Nup43	0.205585	-1.42573	0.011	0.037	1	8
Zfp280c	0.0956012	-1.42542	0.086	0.153	1	8
Mylk	0.915183	-1.42394	0.011	0.009	1	8
4930469K13Rik	0.345283	-1.42153	0.075	0.047	1	8
Ankrd28	0.315895	-1.42137	0.065	0.098	1	8
Nudt17	0.642097	-1.41992	0.022	0.014	1	8
Zc2hc1c	0.139656	-1.4181	0	0.023	1	8
Zfp65	0.0366944	-1.41748	0.022	0.088	1	8
Map4k1	0.145728	-1.41664	0.097	0.158	1	8
Gstz1	0.124902	-1.41659	0.011	0.047	1	8
Mterf1a	0.513205	-1.41613	0.054	0.074	1	8
Phf11b	0.012451	-1.41593	0.075	0.186	1	8
Ubap2	0.0201823	-1.41572	0.108	0.219	1	8
St8sia1	0.318645	-1.41387	0.065	0.098	1	8
Rnf128	0.187414	-1.41265	0	0.019	1	8
Commd10	0.221379	-1.4125	0.151	0.205	1	8
Man2a2	0.165119	-1.41224	0.065	0.116	1	8
Edc3	0.117236	-1.41138	0.054	0.112	1	8
Cd300lf	0.0112749	-1.41013	0.086	0.205	1	8
Kri1	0.22278	-1.41005	0.097	0.144	1	8
Shpk	0.139656	-1.40925	0	0.023	1	8
Kcnk5	0.463251	-1.40672	0.011	0.023	1	8
Prkar2a	0.0836303	-1.40564	0.086	0.158	1	8
Ccdc90b	0.709247	-1.40544	0.075	0.088	1	8
Unk	0.198356	-1.40442	0.054	0.098	1	8
Fabp4	0.0108002	-1.40389	0.032	0.126	1	8
Zfp949	0.689834	-1.40388	0.032	0.042	1	8
Zfp273	0.187414	-1.40342	0	0.019	1	8
Rtn4rl1	0.162117	-1.40094	0.011	0.042	1	8
Lmnb2	0.139656	-1.40046	0	0.023	1	8
Cadm1	0.195049	-1.40028	0.032	0.07	1	8
Prune1	0.174691	-1.40011	0.022	0.056	1	8
Cyp2ab1	0.249897	-1.39771	0.097	0.14	1	8
B430306N03Rik	0.23163	-1.39721	0.022	0.051	1	8
Lactb2	0.221414	-1.39662	0.097	0.149	1	8
Zfp217	0.00519979	-1.39661	0.097	0.233	1	8
Pglyrp1	0.0545165	-1.39604	0.161	0.251	1	8
Abhd15	0.134984	-1.39588	0.043	0.093	1	8
Zfp398	0.1455	-1.39566	0.118	0.177	1	8
Aida	0.150922	-1.39485	0.097	0.158	1	8
Iigp1	0.104958	-1.3934	0	0.028	1	8
Mipol1	0.0505397	-1.3932	0.054	0.126	1	8
Plxdc2	0.982705	-1.39319	0.086	0.084	1	8
Spn	0.0431849	-1.39311	0.269	0.367	1	8
Mib2	0.149207	-1.39292	0.022	0.06	1	8
Uox	0.254798	-1.39273	0	0.014	1	8
Magi2	0.931168	-1.39156	0.022	0.023	1	8
Glce	0.0456606	-1.39091	0.022	0.084	1	8
Il1rapl1	0.736599	-1.39001	0.022	0.028	1	8
Armc10	0.299993	-1.38908	0.032	0.06	1	8
Ebi3	0.174677	-1.38907	0.097	0.149	1	8
Klhdc2	0.10273	-1.38905	0.097	0.172	1	8
Sanbr	0.277081	-1.38784	0.075	0.116	1	8
Cd7	0.352834	-1.38652	0.043	0.07	1	8
Cd300c	0.254798	-1.38593	0	0.014	1	8
Gpsm1	0.120696	-1.38547	0.011	0.047	1	8
Pfkfb1	0.187414	-1.38527	0	0.019	1	8
Pvr	0.996541	-1.3835	0.086	0.084	1	8
Pram1	0.211784	-1.38307	0.054	0.098	1	8
Cxcl13	0.852219	-1.38245	0.032	0.028	1	8
St6galnac2	0.463251	-1.38137	0.011	0.023	1	8
Cibar1	0.104958	-1.38125	0	0.028	1	8
Areg	0.592664	-1.3808	0.022	0.033	1	8
Hip1r	0.590423	-1.37927	0.065	0.084	1	8
Hccs	0.327259	-1.37856	0.075	0.112	1	8
D630023F18Rik	0.254798	-1.3782	0	0.014	1	8
Negr1	0.915183	-1.37748	0.011	0.009	1	8
Pla2g6	0.599287	-1.37666	0.022	0.033	1	8
Polg	0.197422	-1.37542	0.032	0.07	1	8
Tigar	0.187414	-1.3747	0	0.019	1	8
Arfgap3	0.194653	-1.37449	0.043	0.084	1	8
Pxmp4	0.350122	-1.3724	0.097	0.135	1	8
Dot1l	0.0815818	-1.37186	0.086	0.163	1	8
Ttll5	0.113647	-1.37178	0.032	0.084	1	8
Zfp974	0.267985	-1.3705	0.011	0.033	1	8
Smim12	0.299629	-1.36927	0.097	0.14	1	8
Twsg1	0.479792	-1.36806	0.032	0.051	1	8
Sh2b3	0.0477429	-1.36787	0.194	0.293	1	8
Cass4	0.118927	-1.36652	0.065	0.121	1	8
Clpx	0.045321	-1.3665	0.065	0.149	1	8
Itpr2	0.00166361	-1.36649	0.258	0.433	1	8
Themis2	0.012443	-1.36621	0.301	0.414	1	8
Plcb3	0.150264	-1.36605	0.022	0.06	1	8
Ppm1l	0.745116	-1.36569	0.043	0.051	1	8
Evi5l	0.355937	-1.36419	0.011	0.028	1	8
Washc2	0.0380149	-1.36414	0.172	0.27	1	8
Sidt1	0.322799	-1.36393	0.065	0.098	1	8
Ly75	0.578157	-1.36242	0.032	0.047	1	8
Kif19a	0.820105	-1.36212	0.011	0.014	1	8
Gm5127	0.104958	-1.36197	0	0.028	1	8
Atg16l2	0.201578	-1.36174	0.097	0.149	1	8
Gen1	0.254798	-1.3613	0	0.014	1	8
Rassf8	0.383059	-1.3612	0.075	0.107	1	8
Csf2rb2	0.751762	-1.35999	0.129	0.135	1	8
Nipal3	0.203386	-1.35982	0.043	0.084	1	8
Ercc3	0.0404237	-1.35978	0.054	0.135	1	8
Zc3h12d	0.0339685	-1.3595	0.086	0.181	1	8
Nol4l	0.485976	-1.35896	0.022	0.037	1	8
Tex9	0.139656	-1.35858	0	0.023	1	8
3110082I17Rik	0.0499051	-1.35848	0.204	0.298	1	8
Whamm	0.300917	-1.35659	0.054	0.088	1	8
Lgals8	0.00760177	-1.35584	0.129	0.265	1	8
Gfpt1	0.00138294	-1.35548	0.258	0.437	1	8
Zmynd15	0.120696	-1.35459	0.011	0.047	1	8
1700066M21Rik	0.670927	-1.35454	0.032	0.023	1	8
Anks3	0.518291	-1.35427	0.086	0.107	1	8
Mnat1	0.0996825	-1.35224	0.129	0.205	1	8
Cdk19	0.00347262	-1.35183	0.237	0.372	1	8
Ssh3	0.139656	-1.35159	0	0.023	1	8
Ubxn2a	0.311374	-1.35127	0.14	0.181	1	8
Dtx1	0.0946927	-1.35109	0.011	0.051	1	8
Cenpc1	0.0727099	-1.35033	0.075	0.149	1	8
Prkaca	0.32141	-1.35031	0.065	0.098	1	8
Abca6	0.36495	-1.34928	0.022	0.042	1	8
Gm17655	0.187414	-1.34883	0	0.019	1	8
Fzd4	0.267985	-1.34856	0.011	0.033	1	8
Npl	0.51483	-1.34742	0.043	0.028	1	8
Fgd6	0.814584	-1.34566	0.011	0.014	1	8
Zfp512b	0.20388	-1.3452	0.011	0.037	1	8
H2-T24	0.0218254	-1.34452	0.022	0.098	1	8
2310022A10Rik	0.31957	-1.34348	0.097	0.135	1	8
Tnk2	0.113683	-1.34311	0.022	0.065	1	8
Gdpgp1	0.139656	-1.34262	0	0.023	1	8
Kansl2	0.295071	-1.34231	0.086	0.126	1	8
Asf1b	0.104958	-1.34198	0	0.028	1	8
Cilk1	0.740416	-1.34186	0.022	0.028	1	8
Plekhg1	0.068941	-1.34051	0.269	0.335	1	8
Midn	0.0480839	-1.34035	0.151	0.251	1	8
Parp14	0.000411904	-1.33887	0.226	0.409	1	8
Dcaf4	0.209027	-1.33697	0.011	0.037	1	8
Zfp503	0.674618	-1.33663	0.032	0.023	1	8
Rap1gap2	0.00199492	-1.33648	0.355	0.498	1	8
Trim62	0.187414	-1.33588	0	0.019	1	8
Hs6st1	0.0434241	-1.33561	0.054	0.13	1	8
Cnst	0.177827	-1.33522	0.075	0.126	1	8
Mtmr9	0.208986	-1.33508	0.043	0.084	1	8
Abi2	0.15942	-1.33414	0.032	0.074	1	8
Arel1	0.036381	-1.3337	0.043	0.121	1	8
Nbas	0.203246	-1.33228	0.129	0.181	1	8
0610009B22Rik	0.303728	-1.33175	0.054	0.088	1	8
Aldh18a1	0.291965	-1.32977	0.022	0.047	1	8
Nmnat2	0.104958	-1.32971	0	0.028	1	8
Dlg1	0.0013378	-1.32951	0.258	0.437	1	8
Med17	0.0416319	-1.32772	0.086	0.172	1	8
Chfr	0.0240519	-1.32684	0.172	0.284	1	8
Dock6	0.915183	-1.3266	0.011	0.009	1	8
Abcb7	0.00999713	-1.32631	0.161	0.293	1	8
Tars	0.0293922	-1.32626	0.043	0.126	1	8
Mfsd4a	0.296626	-1.32553	0.032	0.06	1	8
Zfr	0.00804111	-1.32461	0.247	0.391	1	8
Fam217b	0.835174	-1.3242	0.032	0.037	1	8
Rrnad1	0.160451	-1.32311	0.043	0.088	1	8
Wdr74	0.271306	-1.32177	0.075	0.116	1	8
Bcl2	0.0143439	-1.32104	0.172	0.307	1	8
Asap2	0.186908	-1.32095	0.032	0.07	1	8
Vti1a	0.00077008	-1.32092	0.484	0.623	1	8
Parvg	0.101133	-1.32032	0.075	0.144	1	8
Rad51c	0.590317	-1.32017	0.054	0.07	1	8
Stpg4	0.254798	-1.31936	0	0.014	1	8
Ino80b	0.226994	-1.31708	0.108	0.158	1	8
Tmed8	0.14401	-1.31573	0.022	0.06	1	8
Cobll1	0.0574581	-1.31441	0.011	0.06	1	8
Tlk2	0.000823755	-1.3143	0.215	0.395	1	8
Lrrc45	0.249558	-1.31288	0.043	0.079	1	8
Ppp2r5b	0.139656	-1.31173	0	0.023	1	8
Chtop	0.0975314	-1.31164	0.194	0.274	1	8
Fbxw17	0.303273	-1.3115	0.043	0.074	1	8
Gtpbp1	0.141309	-1.30962	0.118	0.177	1	8
Cxcr3	0.265806	-1.30842	0.011	0.033	1	8
Prkaa1	0.0406746	-1.30795	0.054	0.135	1	8
Dnaja4	0.0580958	-1.3063	0.022	0.079	1	8
Smo	0.350339	-1.3059	0.011	0.028	1	8
Ccnt2	0.00320449	-1.30585	0.161	0.316	1	8
Ankrd26	0.104958	-1.30563	0	0.028	1	8
Epm2a	0.160758	-1.3052	0.011	0.042	1	8
Slc29a3	0.0130099	-1.30487	0.108	0.233	1	8
Ak6	0.0966398	-1.30471	0.108	0.181	1	8
Slc4a8	0.47038	-1.30452	0.011	0.023	1	8
Ankfy1	0.0227394	-1.30364	0.204	0.321	1	8
Sap18b	0.159408	-1.30265	0.011	0.042	1	8
E2f1	0.552616	-1.30025	0.054	0.07	1	8
Med22	0.139656	-1.29997	0	0.023	1	8
Usp42	0.145038	-1.29891	0.022	0.06	1	8
C5ar1	0.82466	-1.29762	0.097	0.102	1	8
Cdiptos	0.61947	-1.29743	0.011	0.019	1	8
Adat2	0.139656	-1.29705	0	0.023	1	8
Mmp28	0.187414	-1.29673	0	0.019	1	8
Gbp7	0.0730863	-1.29607	0.065	0.14	1	8
Slc22a23	0.187414	-1.29591	0	0.019	1	8
Asb13	0.990551	-1.29564	0.108	0.102	1	8
Daxx	0.0317794	-1.29497	0.086	0.181	1	8
Uhmk1	0.0126154	-1.29453	0.097	0.214	1	8
Mettl17	0.378879	-1.2945	0.022	0.042	1	8
Prss12	0.488821	-1.29323	0.022	0.037	1	8
Usp20	0.0793458	-1.29306	0	0.033	1	8
Ifi214	0.096346	-1.29303	0.011	0.051	1	8
Kif13b	0.0308468	-1.2929	0.161	0.27	1	8
Rbm12b1	0.668521	-1.29209	0.032	0.042	1	8
Fkbpl	0.158067	-1.29108	0.011	0.042	1	8
Kif1a	0.646664	-1.2906	0.022	0.014	1	8
H4c11	0.547806	-1.28825	0.011	0.005	1	8
Tmem241	0.0654453	-1.28707	0.054	0.126	1	8
Kcnq5	0.426059	-1.28706	0.054	0.079	1	8
Sobp	0.171261	-1.28656	0.022	0.005	1	8
Pigg	0.139656	-1.28586	0	0.023	1	8
Fkrp	0.488856	-1.28582	0.054	0.074	1	8
Tcaim	0.0750344	-1.28557	0.011	0.056	1	8
Wdr5	0.131694	-1.28551	0.032	0.079	1	8
Hrh2	0.267985	-1.28518	0.011	0.033	1	8
Fmn1	0.285574	-1.28488	0.086	0.13	1	8
Tmem120b	0.236346	-1.28469	0.022	0.051	1	8
1700001K19Rik	0.369482	-1.28469	0.14	0.167	1	8
Ptgs2	0.449278	-1.28361	0.086	0.112	1	8
Fam122a	0.344242	-1.28225	0.043	0.07	1	8
Bbs10	0.908686	-1.28224	0.011	0.009	1	8
Slc38a6	0.140191	-1.28132	0.065	0.121	1	8
Ccdc85b	0.00948213	-1.28129	0.129	0.256	1	8
2700049A03Rik	0.188055	-1.28072	0.032	0.07	1	8
Fgd3	0.0108165	-1.27971	0.172	0.316	1	8
Atad2	0.0121771	-1.27957	0.097	0.214	1	8
Thada	0.00628506	-1.27844	0.118	0.256	1	8
Cfap418	0.466808	-1.27806	0.011	0.023	1	8
Dnajc6	0.162117	-1.27736	0.011	0.042	1	8
Adgrv1	0.152394	-1.27724	0.022	0.06	1	8
Trem3	0.0538966	-1.27657	0.161	0.247	1	8
Themis	0.313161	-1.27627	0.065	0.098	1	8
Zfp1	0.277606	-1.27585	0.065	0.102	1	8
Limk2	0.0983056	-1.27582	0.054	0.112	1	8
Tia1	0.0153608	-1.27563	0.108	0.219	1	8
Zfp605	0.202185	-1.27561	0.011	0.037	1	8
Mcu	0.222828	-1.27531	0.14	0.195	1	8
Mterf4	0.122785	-1.27496	0.011	0.047	1	8
Ccdc69	0.300218	-1.27484	0.043	0.074	1	8
Tnfrsf9	0.361591	-1.27399	0.011	0.028	1	8
Cyp4f17	0.104958	-1.27258	0	0.028	1	8
Nomo1	0.134984	-1.27224	0.043	0.093	1	8
Tbc1d2b	0.0203522	-1.27135	0.183	0.298	1	8
Snx33	0.387891	-1.2707	0.022	0.009	1	8
Adgrg3	0.187414	-1.27048	0	0.019	1	8
Bclaf3	0.252077	-1.27027	0.086	0.13	1	8
Extl3	0.18126	-1.27023	0.075	0.121	1	8
Dpp4	0.00458177	-1.26986	0.194	0.344	1	8
Slc25a53	0.290066	-1.26857	0.022	0.047	1	8
Mprip	0.0432742	-1.26823	0.161	0.26	1	8
Ncam1	0.254798	-1.26815	0	0.014	1	8
Garre1	0.0494621	-1.26744	0.086	0.172	1	8
Zfp120	0.0636332	-1.26607	0.065	0.14	1	8
Ibtk	0.0987787	-1.26594	0.118	0.195	1	8
Ing4	0.0353061	-1.26516	0.129	0.228	1	8
Axdnd1	0.254798	-1.26202	0	0.014	1	8
Vps26b	0.126348	-1.26006	0.054	0.107	1	8
Zfp382	0.187414	-1.25932	0	0.019	1	8
Fbxo31	0.148135	-1.25773	0.054	0.102	1	8
Gfm2	0.276371	-1.25654	0.065	0.102	1	8
Telo2	0.140959	-1.25611	0.022	0.06	1	8
Ifi211	0.00300362	-1.25593	0.075	0.219	1	8
Itgb3	0.311	-1.25549	0.043	0.074	1	8
Dnajb4	0.187468	-1.25534	0.237	0.293	1	8
Gucy2c	0.187414	-1.25417	0	0.019	1	8
Tubb3	0.187414	-1.25231	0	0.019	1	8
Med7	0.174697	-1.25131	0.129	0.186	1	8
Tor2a	0.263037	-1.25015	0.097	0.14	1	8
Mroh1	0.263635	-1.2497	0.086	0.13	1	8
Naip6	0.179885	-1.24905	0.172	0.242	1	8
Tmem191	0.586075	-1.24765	0.022	0.033	1	8
Klf8	0.956649	-1.24673	0.054	0.051	1	8
Ttc33	0.38666	-1.24665	0.065	0.093	1	8
Bmp2	0.254798	-1.24608	0	0.014	1	8
Eno3	0.0373873	-1.24591	0.151	0.247	1	8
Ngrn	0.543726	-1.24556	0.065	0.084	1	8
Crtap	0.104958	-1.24386	0	0.028	1	8
Rwdd2b	0.155409	-1.24354	0.011	0.042	1	8
Trim30a	4.43571e-05	-1.24342	0.194	0.437	0.734111	8
Gm12258	0.187414	-1.24091	0	0.019	1	8
Bend6	0.254798	-1.24038	0	0.014	1	8
Coq5	0.245738	-1.24019	0.065	0.107	1	8
Retreg3	0.0125885	-1.23948	0.086	0.2	1	8
Slc36a1	0.650013	-1.23865	0.086	0.102	1	8
Batf2	0.877398	-1.2386	0.022	0.019	1	8
2200002D01Rik	0.646664	-1.23842	0.022	0.014	1	8
Arl10	0.092316	-1.23825	0.022	0.07	1	8
Fhip2a	0.244845	-1.2377	0.075	0.121	1	8
Nudt16	0.0909613	-1.2364	0.022	0.07	1	8
Mcm3	0.23681	-1.23598	0.054	0.093	1	8
Nckap1	0.187414	-1.23567	0	0.019	1	8
Lrrc57	0.304808	-1.2356	0.043	0.074	1	8
Ms4a4c	0.000246152	-1.23478	0.333	0.526	1	8
Ace	0.000211475	-1.23272	0.194	0.414	1	8
Cdca7	0.187414	-1.23262	0	0.019	1	8
Cep78	0.168528	-1.23154	0.032	0.074	1	8
Cd2	0.0516546	-1.23136	0.032	0.098	1	8
Eya3	0.0432862	-1.23057	0.172	0.274	1	8
Xndc1	0.187414	-1.22851	0	0.019	1	8
Stk26	0.290162	-1.22842	0.065	0.102	1	8
Ubxn11	0.740416	-1.22752	0.022	0.028	1	8
Slc35a3	0.385159	-1.22361	0.086	0.121	1	8
Pias4	0.232289	-1.2231	0.043	0.079	1	8
Cyp7b1	0.659466	-1.22099	0.032	0.042	1	8
Il7r	0.0199374	-1.21966	0.065	0.163	1	8
Itpripl2	0.0118334	-1.21958	0.054	0.163	1	8
Vezf1	0.0591809	-1.21913	0.172	0.27	1	8
Ppargc1b	0.289278	-1.21794	0.086	0.126	1	8
A530032D15Rik	0.993616	-1.21737	0.043	0.042	1	8
Phf12	0.00973103	-1.21608	0.14	0.279	1	8
Vipas39	0.130426	-1.21467	0.086	0.144	1	8
Kcnk3	0.254798	-1.21369	0	0.014	1	8
Naxd	0.169948	-1.2134	0.161	0.223	1	8
Cpd	0.0173682	-1.21308	0.075	0.186	1	8
Dtd2	0.0788597	-1.21196	0.032	0.088	1	8
Pgm2l1	0.663944	-1.21058	0.054	0.065	1	8
Zbtb33	0.0574581	-1.21031	0.011	0.06	1	8
Wdr45	0.52846	-1.20985	0.043	0.06	1	8
Plekhf2	0.00997271	-1.20977	0.118	0.251	1	8
Pole3	0.119526	-1.20928	0.086	0.149	1	8
Tbc1d25	0.139656	-1.20906	0	0.023	1	8
Ift81	0.187414	-1.20893	0	0.019	1	8
Rif1	0.199229	-1.20877	0.14	0.195	1	8
Mtrf1	0.472621	-1.2087	0.032	0.051	1	8
Gopc	0.168868	-1.20856	0.075	0.13	1	8
Riox2	0.123544	-1.2083	0.086	0.149	1	8
Prodh	0.187414	-1.20699	0	0.019	1	8
Ogfod3	0.139656	-1.20695	0	0.023	1	8
Mrps18b	0.215621	-1.2065	0.097	0.144	1	8
Dlgap5	0.254798	-1.20574	0	0.014	1	8
Ric8b	0.231979	-1.20567	0.086	0.13	1	8
Capns2	0.187414	-1.20527	0	0.019	1	8
Exoc3l4	0.473967	-1.20465	0.011	0.023	1	8
Abhd5	0.469113	-1.20447	0.065	0.088	1	8
Cby1	0.357986	-1.20419	0.032	0.056	1	8
Dpy19l4	0.971754	-1.2041	0.118	0.112	1	8
Slc16a2	0.254798	-1.20265	0	0.014	1	8
Ugt1a6a	0.254798	-1.20227	0	0.014	1	8
Lacc1	0.215483	-1.20223	0.151	0.2	1	8
Ccdc125	0.0807684	-1.20194	0.108	0.186	1	8
Trap1	0.950396	-1.20116	0.129	0.121	1	8
Lilra5	0.2764	-1.2009	0.054	0.088	1	8
Stard7	0.195796	-1.2001	0.204	0.26	1	8
E4f1	0.130561	-1.19974	0.054	0.107	1	8
Sesn3	0.045321	-1.19814	0.065	0.149	1	8
Alg1	0.545717	-1.19771	0.065	0.084	1	8
Zc3h18	0.437935	-1.19764	0.161	0.195	1	8
Arhgap10	0.112488	-1.19719	0.054	0.112	1	8
Uba2	0.0106751	-1.19679	0.129	0.27	1	8
Dnajc11	0.930921	-1.19654	0.097	0.098	1	8
Dgkh	0.0140804	-1.19632	0.226	0.358	1	8
Gmps	0.164516	-1.19297	0.183	0.247	1	8
Fastkd3	0.918304	-1.19231	0.022	0.023	1	8
Bicra	0.0449426	-1.19147	0.183	0.279	1	8
Wdr73	0.199817	-1.19145	0.032	0.07	1	8
Fam241a	0.355827	-1.19134	0.161	0.205	1	8
Nedd4	0.918657	-1.1911	0.054	0.056	1	8
Ntn4	0.463251	-1.19101	0.011	0.023	1	8
Alg13	0.303311	-1.18934	0.086	0.126	1	8
Lonp1	0.383497	-1.18754	0.065	0.093	1	8
Larp7	0.0216472	-1.18653	0.097	0.209	1	8
Zfp521	0.139656	-1.18546	0	0.023	1	8
Pag1	0.0109616	-1.18545	0.398	0.512	1	8
S1pr2	0.0957736	-1.18533	0.022	0.07	1	8
Acss1	0.030731	-1.18501	0.086	0.181	1	8
Rilpl1	0.385964	-1.18383	0.022	0.042	1	8
Tmem63b	0.018941	-1.18341	0.043	0.135	1	8
Abcd2	0.112066	-1.18326	0.204	0.284	1	8
Gm7694	0.187414	-1.18076	0	0.019	1	8
Tnfrsf14	0.614987	-1.17928	0.011	0.019	1	8
Donson	0.0673927	-1.17854	0.054	0.126	1	8
Tfdp2	0.134203	-1.17808	0.043	0.093	1	8
Gcc2	0.0394084	-1.17746	0.097	0.191	1	8
Ahsa2	0.115616	-1.1773	0.097	0.163	1	8
Phtf2	0.00665715	-1.17636	0.118	0.251	1	8
Cyp4f18	0.00519144	-1.17595	0.323	0.493	1	8
Mms19	0.0327274	-1.17566	0.108	0.209	1	8
Zfp994	0.859849	-1.17553	0.086	0.079	1	8
Rpa1	0.0836431	-1.17549	0.065	0.135	1	8
Gm49336	0.236683	-1.17524	0.043	0.079	1	8
Dda1	0.0216676	-1.17286	0.086	0.191	1	8
Sell	0.117279	-1.17279	0.14	0.219	1	8
Gtpbp8	0.298698	-1.17179	0.043	0.074	1	8
Zfp990	0.254798	-1.17163	0	0.014	1	8
Med23	0.285252	-1.17141	0.043	0.074	1	8
Pde1c	0.595972	-1.17085	0.022	0.033	1	8
Med18	0.254798	-1.17006	0	0.014	1	8
Cd72	0.113372	-1.1688	0.043	0.098	1	8
Il2rb	0.130553	-1.16834	0.065	0.121	1	8
Wbp1	0.363322	-1.16833	0.043	0.07	1	8
Cdh23	0.427876	-1.16716	0.054	0.079	1	8
Ahcyl2	0.00230116	-1.16692	0.258	0.414	1	8
Pbx1	0.0174116	-1.16642	0.183	0.316	1	8
Snai1	0.254798	-1.16578	0	0.014	1	8
Fchsd1	0.187414	-1.1655	0	0.019	1	8
Panx1	0.152486	-1.16547	0.086	0.14	1	8
Cbfa2t3	0.000666794	-1.16524	0.29	0.474	1	8
Otud6b	0.0858609	-1.16492	0.065	0.13	1	8
Mynn	0.20343	-1.16436	0.065	0.112	1	8
Rundc3b	0.0743823	-1.16259	0.011	0.056	1	8
Dync1li2	0.0155856	-1.16159	0.097	0.209	1	8
Rpap2	0.493543	-1.15738	0.075	0.098	1	8
Hltf	0.132708	-1.1569	0.161	0.228	1	8
Lck	0.0245249	-1.1565	0.043	0.13	1	8
Hpse	0.0391997	-1.15636	0.29	0.405	1	8
Sh3bp4	0.429437	-1.15611	0.043	0.065	1	8
Parp6	0.0453083	-1.15523	0.022	0.084	1	8
Poll	0.523863	-1.1551	0.043	0.06	1	8
Bloc1s3	0.131114	-1.1543	0.043	0.093	1	8
Fam161a	0.820105	-1.15411	0.011	0.014	1	8
Fgfr2	0.0415961	-1.15283	0.161	0.27	1	8
Camk4	0.286355	-1.15251	0.065	0.102	1	8
Ppp1r14c	0.187414	-1.15174	0	0.019	1	8
Stoml1	0.149207	-1.15149	0.022	0.06	1	8
Cdc42bpb	0.116041	-1.15094	0.118	0.186	1	8
Irf7	8.36465e-05	-1.15063	0.086	0.288	1	8
Epha4	0.513205	-1.15031	0.054	0.074	1	8
Gatc	0.421473	-1.14926	0.043	0.065	1	8
Tcf3	0.359718	-1.14883	0.108	0.144	1	8
F2r	0.381232	-1.14723	0.022	0.042	1	8
Slc25a19	0.486855	-1.146	0.054	0.074	1	8
Aebp2	0.00132196	-1.1458	0.172	0.367	1	8
Maml2	0.018063	-1.14548	0.172	0.293	1	8
Rnf31	0.0287767	-1.14525	0.022	0.093	1	8
Slc44a1	0.2764	-1.14478	0.054	0.088	1	8
Med4	0.466815	-1.14455	0.086	0.112	1	8
Isg20	0.294952	-1.14403	0.032	0.06	1	8
Disp1	0.120456	-1.1436	0.022	0.065	1	8
Thy1	0.194352	-1.14337	0.054	0.098	1	8
Fez2	0.620767	-1.14268	0.118	0.098	1	8
Retreg1	0.00385704	-1.14265	0.183	0.33	1	8
Gm49325	0.254798	-1.14261	0	0.014	1	8
Epop	0.139656	-1.14241	0	0.023	1	8
Kctd16	0.139656	-1.14222	0	0.023	1	8
Cd274	0.0104926	-1.1422	0.28	0.419	1	8
Adnp2	0.871371	-1.14209	0.075	0.079	1	8
Ntng2	0.257842	-1.14165	0.183	0.233	1	8
Recql	0.164433	-1.14156	0.032	0.074	1	8
Opn3	0.254798	-1.14142	0	0.014	1	8
Rsph3b	0.347562	-1.14124	0.011	0.028	1	8
Egln1	0.0184393	-1.14101	0.097	0.214	1	8
H2ac8	0.0764228	-1.14048	0.108	0.191	1	8
Nlk	0.0536044	-1.13976	0.14	0.233	1	8
Mrpl50	0.502717	-1.13914	0.097	0.121	1	8
Zcchc17	0.370622	-1.1391	0.204	0.242	1	8
Rbak	0.12384	-1.13859	0.011	0.047	1	8
Zfand4	0.270177	-1.13655	0.011	0.033	1	8
Stk4	0.000386889	-1.13578	0.376	0.577	1	8
Slx4ip	0.0315534	-1.13563	0.108	0.209	1	8
Cd37	0.0167798	-1.13538	0.237	0.363	1	8
Ppp1r16a	0.160758	-1.13422	0.011	0.042	1	8
Rnf5	0.593246	-1.1337	0.075	0.093	1	8
Spsb1	0.299647	-1.1336	0.022	0.047	1	8
Coq9	0.0677201	-1.13223	0.043	0.107	1	8
Abca2	0.437221	-1.13155	0.065	0.088	1	8
Septin10	0.793303	-1.13123	0.129	0.135	1	8
Aqp3	0.139656	-1.13081	0	0.023	1	8
H3c7	0.309444	-1.13013	0.043	0.074	1	8
Scnn1a	0.589366	-1.12995	0.022	0.033	1	8
Nnat	0.254798	-1.12978	0	0.014	1	8
Osbpl1a	0.828295	-1.12873	0.065	0.07	1	8
Sbf1	0.493644	-1.12833	0.118	0.144	1	8
Tnfrsf18	0.121737	-1.12812	0.011	0.047	1	8
Smg5	0.274522	-1.12708	0.097	0.14	1	8
Rnf17	0.187414	-1.12648	0	0.019	1	8
Cracr2a	0.243762	-1.12619	0.032	0.065	1	8
Pnp2	0.814584	-1.12576	0.011	0.014	1	8
Tecpr1	0.0800905	-1.12519	0.065	0.135	1	8
C1galt1	0.559805	-1.1248	0.204	0.223	1	8
Polr3b	0.149708	-1.12468	0.086	0.14	1	8
Klrc1	0.209027	-1.12424	0.011	0.037	1	8
Dnah12	0.0394037	-1.12365	0.032	0.102	1	8
Gna11	0.131881	-1.12332	0.043	0.093	1	8
Ckap5	0.0596662	-1.12309	0.097	0.181	1	8
Hdgfl2	0.190366	-1.12204	0.032	0.07	1	8
Lrp1b	0.66152	-1.12128	0.054	0.065	1	8
Pip5k1b	0.0651995	-1.1211	0.032	0.093	1	8
Macrod1	0.728156	-1.12059	0.054	0.065	1	8
Fntb	0.96018	-1.12043	0.032	0.033	1	8
Sclt1	0.364101	-1.11929	0.075	0.112	1	8
Tgfbrap1	0.26224	-1.11929	0.075	0.116	1	8
Zfp688	0.203448	-1.11922	0.032	0.07	1	8
Sh2d3c	0.0483247	-1.11871	0.129	0.223	1	8
Zfp317	0.591906	-1.11738	0.032	0.047	1	8
Lipc	0.451782	-1.11656	0.043	0.065	1	8
Sgk3	0.00182869	-1.11493	0.387	0.572	1	8
Dcdc2b	0.254798	-1.11444	0	0.014	1	8
Hira	0.12808	-1.11432	0.043	0.093	1	8
Fbxl2	0.911114	-1.11374	0.065	0.07	1	8
Tcf7l2	0.067804	-1.11345	0.172	0.265	1	8
Gem	0.0643963	-1.11298	0.086	0.167	1	8
Gpc1	0.187414	-1.11235	0	0.019	1	8
Aste1	0.377606	-1.11199	0.043	0.07	1	8
Haus3	0.104917	-1.11195	0.043	0.098	1	8
Mfhas1	0.938246	-1.11155	0.054	0.056	1	8
Jpt2	0.23681	-1.11124	0.054	0.093	1	8
Slc46a3	0.0161599	-1.11117	0.129	0.251	1	8
Cd82	0.01496	-1.11106	0.204	0.335	1	8
Tmem218	0.187414	-1.10971	0	0.019	1	8
Rcan1	0.151733	-1.10858	0.065	0.116	1	8
Scn1b	0.301588	-1.1072	0.022	0.047	1	8
Slc9a7	0.239235	-1.10706	0.151	0.2	1	8
Stap1	0.000195892	-1.10612	0.204	0.423	1	8
Eci2	0.189696	-1.10586	0.108	0.167	1	8
Mrpl55	0.964226	-1.10503	0.14	0.13	1	8
Epsti1	4.8427e-05	-1.10492	0.516	0.688	0.801467	8
Mfap1a	0.109565	-1.10479	0.14	0.223	1	8
Plec	0.0406549	-1.1045	0.172	0.279	1	8
Cdkn2a	0.736599	-1.10389	0.022	0.028	1	8
Invs	0.163202	-1.10388	0.043	0.088	1	8
Slc44a2	0.00482255	-1.10336	0.29	0.451	1	8
Nrarp	0.205585	-1.10323	0.011	0.037	1	8
Plekhg2	0.722481	-1.10293	0.097	0.084	1	8
Acoxl	0.583638	-1.10195	0.032	0.047	1	8
Abca9	0.0321677	-1.10184	0.118	0.219	1	8
Cog6	0.155409	-1.1018	0.011	0.042	1	8
Diablo	0.777773	-1.10083	0.118	0.13	1	8
Pithd1	0.211238	-1.10024	0.065	0.112	1	8
Amn1	0.40434	-1.10006	0.065	0.093	1	8
Cdc25b	0.139656	-1.09949	0	0.023	1	8
Pef1	0.186635	-1.09938	0.065	0.112	1	8
Maea	0.106277	-1.09892	0.129	0.209	1	8
Cdk5r1	0.825635	-1.09735	0.011	0.014	1	8
Acox3	0.491855	-1.09665	0.258	0.284	1	8
Mrm2	0.347562	-1.09633	0.011	0.028	1	8
Mettl25	0.0463357	-1.09561	0.075	0.158	1	8
Ppp1r16b	0.129145	-1.09418	0.054	0.107	1	8
P2ry10b	0.391641	-1.09403	0.086	0.116	1	8
Ttc21b	0.547806	-1.09396	0.011	0.005	1	8
Slc22a15	0.129452	-1.09319	0.075	0.135	1	8
Camk2d	0.00229599	-1.093	0.419	0.581	1	8
Wrn	0.0322639	-1.09287	0.14	0.242	1	8
Gm12185	0.0372695	-1.09282	0.129	0.228	1	8
Dennd1b	0.00651121	-1.09281	0.247	0.391	1	8
Bank1	0.710657	-1.09278	0.054	0.065	1	8
Scel	0.610517	-1.09253	0.011	0.019	1	8
Nphp3	0.254798	-1.09235	0	0.014	1	8
Prkdc	0.0913768	-1.09212	0.075	0.144	1	8
Batf	0.0473172	-1.09179	0.118	0.214	1	8
Zfp677	0.12384	-1.09165	0.011	0.047	1	8
Fastkd2	0.0447958	-1.09063	0.011	0.065	1	8
Adsl	0.221458	-1.09047	0.054	0.098	1	8
Cul5	0.151666	-1.09037	0.161	0.223	1	8
Zhx1	0.192425	-1.08925	0.14	0.2	1	8
Nsun3	0.859148	-1.08846	0.086	0.093	1	8
Gal	0.187414	-1.08806	0	0.019	1	8
Bop1	0.325587	-1.08671	0.065	0.098	1	8
Fam227a	0.254798	-1.08637	0	0.014	1	8
Coa4	0.0858609	-1.08621	0.065	0.13	1	8
Zdhhc2	0.139656	-1.08609	0	0.023	1	8
Spdl1	0.744239	-1.08522	0.022	0.028	1	8
Rybp	0.356802	-1.08457	0.355	0.391	1	8
Tor1b	0.621569	-1.08331	0.108	0.126	1	8
Xkr6	0.187414	-1.08207	0	0.019	1	8
Prkab2	0.748488	-1.08154	0.204	0.186	1	8
Nup85	0.117031	-1.08058	0.022	0.065	1	8
Rpl9-ps6	0.110963	-1.08027	0.065	0.126	1	8
Shcbp1l	0.187414	-1.08022	0	0.019	1	8
Nat9	0.0683818	-1.08012	0.032	0.093	1	8
Emid1	0.254798	-1.08005	0	0.014	1	8
Plpp5	0.38123	-1.07998	0.043	0.07	1	8
Dnajc25	0.0848875	-1.07989	0.032	0.088	1	8
Cyb5d1	0.820105	-1.07953	0.011	0.014	1	8
Snap47	0.207301	-1.07942	0.011	0.037	1	8
Scap	0.202045	-1.07939	0.075	0.126	1	8
Hells	0.162117	-1.07931	0.011	0.042	1	8
Mcat	0.459551	-1.07909	0.032	0.019	1	8
Il15	0.0846504	-1.07905	0.14	0.223	1	8
Maz	0.576453	-1.07888	0.14	0.163	1	8
Cbx8	0.124902	-1.07886	0.011	0.047	1	8
Raet1e	0.0671526	-1.07859	0.118	0.205	1	8
Fancf	0.61947	-1.0768	0.011	0.019	1	8
Pdss2	0.501911	-1.07671	0.097	0.121	1	8
Tbc1d8	0.00509568	-1.07635	0.333	0.507	1	8
Ptar1	0.580568	-1.07622	0.086	0.107	1	8
Aldh6a1	0.254798	-1.07601	0	0.014	1	8
Rnf6	0.101692	-1.07306	0.151	0.223	1	8
Mansc1	0.254798	-1.07242	0	0.014	1	8
Gtdc1	0.0134225	-1.07118	0.226	0.363	1	8
Tmc4	0.207301	-1.0711	0.011	0.037	1	8
Paip2b	0.0971812	-1.07057	0.011	0.051	1	8
Glcci1	0.187414	-1.07002	0	0.019	1	8
Gzf1	0.30232	-1.06988	0.054	0.088	1	8
Has2	0.254798	-1.06937	0	0.014	1	8
Irgm1	0.473737	-1.06868	0.108	0.135	1	8
Pde4d	0.244112	-1.06817	0.14	0.195	1	8
Ralgps1	0.0862569	-1.06753	0.043	0.102	1	8
H2bc6	0.0355615	-1.06739	0.022	0.088	1	8
Abcd1	0.140409	-1.06721	0.194	0.27	1	8
Caml	0.43212	-1.06606	0.086	0.112	1	8
Myb	0.639671	-1.06592	0.043	0.033	1	8
Arhgap18	0.95814	-1.06553	0.258	0.242	1	8
St7l	0.0669017	-1.06514	0.075	0.153	1	8
Cops2	0.0103572	-1.06427	0.097	0.223	1	8
Ppip5k1	0.385964	-1.06333	0.022	0.042	1	8
Nt5dc1	0.0109509	-1.06291	0.14	0.27	1	8
Mast3	0.0269115	-1.06144	0.129	0.237	1	8
Klrb1b	0.355937	-1.06125	0.011	0.028	1	8
Coro2a	0.0468412	-1.06105	0.151	0.242	1	8
Sgms2	0.598882	-1.06072	0.183	0.214	1	8
Mllt6	0.942818	-1.05996	0.118	0.107	1	8
Tnfrsf11a	0.22512	-1.05967	0.065	0.107	1	8
Elp3	0.922789	-1.05967	0.065	0.06	1	8
Asb6	0.853234	-1.05945	0.065	0.07	1	8
1110059G10Rik	0.209248	-1.0593	0.161	0.219	1	8
Siglech	0.471883	-1.05869	0.022	0.037	1	8
Lss	0.187414	-1.05762	0	0.019	1	8
Slc35c1	0.129206	-1.05704	0.032	0.079	1	8
Ccne2	0.187414	-1.05682	0	0.019	1	8
Reck	0.466808	-1.05658	0.011	0.023	1	8
Rasgrp1	0.0273623	-1.05558	0.172	0.298	1	8
Paip1	0.0120584	-1.05394	0.14	0.265	1	8
Rps6ka1	0.00210888	-1.0533	0.151	0.326	1	8
Kat8	0.439513	-1.05282	0.043	0.065	1	8
Creb3l2	0.299647	-1.05261	0.022	0.047	1	8
Sh2d1b1	0.049166	-1.05244	0.065	0.14	1	8
Zfp169	0.163484	-1.05195	0.011	0.042	1	8
Nucb2	0.499653	-1.05189	0.086	0.112	1	8
Taok2	0.371004	-1.05163	0.065	0.093	1	8
Cdh10	0.915183	-1.05158	0.011	0.009	1	8
Anapc5	0.0894958	-1.05123	0.172	0.256	1	8
Prpf8	0.349023	-1.05096	0.183	0.233	1	8
Xpo5	0.200078	-1.05075	0.043	0.084	1	8
Trim2	0.477493	-1.05069	0.022	0.037	1	8
Gar1	0.39049	-1.05035	0.075	0.107	1	8
Pmp22	0.646664	-1.05024	0.022	0.014	1	8
Pals1	0.141612	-1.04992	0.065	0.121	1	8
Parp4	0.00605936	-1.04966	0.14	0.288	1	8
Rpl3l	0.680669	-1.0495	0.032	0.042	1	8
Kdr	0.254798	-1.0494	0	0.014	1	8
Sec14l1	0.0502237	-1.04808	0.194	0.293	1	8
Csnk1g2	0.140691	-1.04788	0.151	0.228	1	8
Eeig1	0.210728	-1.04463	0.054	0.098	1	8
Sipa1	0.298492	-1.04449	0.194	0.233	1	8
Gm49361	0.353131	-1.04436	0.011	0.028	1	8
Engase	0.159408	-1.04395	0.011	0.042	1	8
Polr2d	0.71449	-1.04334	0.086	0.098	1	8
Wdr12	0.875825	-1.04195	0.086	0.088	1	8
Hycc2	0.176028	-1.04181	0.075	0.13	1	8
Lta4h	0.284479	-1.04143	0.151	0.195	1	8
Uprt	0.364114	-1.04132	0.043	0.023	1	8
Btf3l4	0.505523	-1.03994	0.086	0.112	1	8
Ppih	0.153376	-1.03984	0.065	0.121	1	8
Gba2	0.23163	-1.03946	0.022	0.051	1	8
C1ra	0.187414	-1.03922	0	0.019	1	8
Abca3	0.583105	-1.0384	0.161	0.177	1	8
Pkd1l2	0.641447	-1.03811	0.043	0.056	1	8
Nfkbil1	0.0845825	-1.03791	0.075	0.149	1	8
Krit1	0.0604762	-1.0373	0.194	0.288	1	8
Cryba4	0.160758	-1.03697	0.011	0.042	1	8
Czib	0.161093	-1.03663	0.065	0.116	1	8
Khnyn	0.255976	-1.03605	0.118	0.167	1	8
Slc30a5	0.142217	-1.03585	0.194	0.265	1	8
Rgp1	0.288175	-1.03561	0.022	0.047	1	8
Rnd1	0.693309	-1.03527	0.054	0.065	1	8
Cpsf6	0.103252	-1.03517	0.344	0.428	1	8
Macir	0.18054	-1.03481	0.247	0.307	1	8
Dynlt3	0.297827	-1.03451	0.151	0.2	1	8
Atl2	0.184511	-1.03444	0.183	0.242	1	8
Dipk2a	0.205507	-1.0344	0.054	0.098	1	8
H2bc22	0.915183	-1.03372	0.011	0.009	1	8
Tm7sf2	0.187414	-1.03344	0	0.019	1	8
Ms4a4b	0.173424	-1.03318	0.172	0.237	1	8
Nkiras1	0.110715	-1.03259	0.043	0.098	1	8
Slc25a25	0.280199	-1.03241	0.129	0.177	1	8
Iqsec2	0.197713	-1.03135	0.065	0.112	1	8
Gypc	0.0956448	-1.03073	0.043	0.102	1	8
Pou2f2	0.008825	-1.03028	0.409	0.572	1	8
Ksr2	0.358757	-1.03025	0.011	0.028	1	8
Trak2	0.316135	-1.0302	0.118	0.163	1	8
Cmya5	0.254798	-1.02993	0	0.014	1	8
Cpn1	0.254798	-1.02864	0	0.014	1	8
Arhgef10	0.24113	-1.02849	0.022	0.051	1	8
Spint1	0.361591	-1.02839	0.011	0.028	1	8
Tbc1d8b	0.164127	-1.02832	0.043	0.088	1	8
S1pr1	0.449397	-1.02703	0.075	0.102	1	8
Osbpl11	0.367151	-1.02703	0.129	0.172	1	8
Lrrc40	0.201398	-1.0268	0.054	0.098	1	8
Lef1	0.364148	-1.02657	0.075	0.107	1	8
Zfp944	0.101114	-1.026	0.108	0.181	1	8
Ifi47	0.0914805	-1.02576	0.108	0.186	1	8
Tbc1d23	0.0698062	-1.0254	0.204	0.312	1	8
Tom1l2	0.0909738	-1.02528	0.086	0.158	1	8
Dclre1b	0.887916	-1.02521	0.043	0.047	1	8
Armcx2	0.254798	-1.02506	0	0.014	1	8
Tbc1d19	0.47038	-1.02427	0.011	0.023	1	8
Hspa9	0.113647	-1.02391	0.226	0.316	1	8
Adamts6	0.066548	-1.02368	0.032	0.093	1	8
Chst10	0.270177	-1.02361	0.011	0.033	1	8
Spring1	0.0826539	-1.02309	0.032	0.088	1	8
Trmt1l	0.057759	-1.02269	0.086	0.167	1	8
Adssl1	0.0311941	-1.02256	0.333	0.456	1	8
Trmt10b	0.73102	-1.02241	0.043	0.051	1	8
Fam3a	0.160758	-1.02235	0.011	0.042	1	8
Fam184b	0.254798	-1.02231	0	0.014	1	8
Cbx6	0.160758	-1.02201	0.011	0.042	1	8
Ptprcap	0.121969	-1.02174	0.108	0.177	1	8
Il2ra	0.183435	-1.02131	0.022	0.056	1	8
Myo6	0.187414	-1.02119	0	0.019	1	8
Rap1gap	0.254798	-1.02108	0	0.014	1	8
Ecsit	0.417044	-1.02083	0.054	0.079	1	8
Fem1b	0.0913768	-1.02045	0.075	0.144	1	8
Slc39a13	0.195729	-1.02026	0.043	0.084	1	8
Ier3	0.853819	-1.02015	0.194	0.2	1	8
Teddm2	0.254798	-1.01869	0	0.014	1	8
Clec4a4	0.74229	-1.01796	0.043	0.051	1	8
Klhl20	0.402713	-1.01737	0.065	0.093	1	8
Anxa11	0.0848399	-1.01729	0.215	0.302	1	8
Smad1	0.266374	-1.01703	0.118	0.167	1	8
Herc6	0.100732	-1.01644	0.075	0.14	1	8
Pik3ap1	0.00400237	-1.01626	0.387	0.544	1	8
Vopp1	0.238176	-1.01626	0.108	0.153	1	8
Ptpn21	0.254798	-1.01582	0	0.014	1	8
Slmap	0.0632813	-1.01538	0.247	0.353	1	8
Rpf2	0.726886	-1.01495	0.129	0.14	1	8
Trpm6	0.254798	-1.01436	0	0.014	1	8
Bik	0.187414	-1.01375	0	0.019	1	8
Pskh1	0.553794	-1.01345	0.032	0.047	1	8
Cd22	0.820105	-1.01308	0.011	0.014	1	8
Mtor	0.345471	-1.01222	0.129	0.172	1	8
Rnf220	0.26224	-1.01213	0.129	0.177	1	8
Poglut3	0.350339	-1.01212	0.011	0.028	1	8
Cwc25	0.102703	-1.01197	0.129	0.205	1	8
Acod1	0.759298	-1.01181	0.043	0.051	1	8
Gm26992	0.270932	-1.01171	0.108	0.153	1	8
Samd13	0.254798	-1.01143	0	0.014	1	8
Nlrp1a	0.671861	-1.01021	0.086	0.098	1	8
Rnf8	0.137823	-1.01004	0.054	0.107	1	8
Tex14	0.0539979	-1.00991	0.226	0.349	1	8
Oas1b	0.187414	-1.00954	0	0.019	1	8
Gcnt2	0.0431551	-1.00861	0.29	0.381	1	8
Dcp1b	0.668806	-1.00826	0.097	0.079	1	8
Cenpt	0.187414	-1.0071	0	0.019	1	8
Atp10a	0.391435	-1.00694	0.065	0.093	1	8
Rpa2	0.910209	-1.00606	0.097	0.093	1	8
Syne3	0.654139	-1.00597	0.075	0.088	1	8
Bex3	0.485845	-1.00526	0.097	0.126	1	8
Btk	0.334993	-1.00453	0.215	0.265	1	8
Arfgap1	0.0951843	-1.0042	0.075	0.144	1	8
Ipp	0.367249	-1.00272	0.022	0.042	1	8
Entpd5	0.595972	-1.00172	0.022	0.033	1	8
2210016L21Rik	0.0444398	-1.00144	0.032	0.102	1	8
Pcnx4	0.160758	-1.00058	0.011	0.042	1	8
Plekha2	0.0592493	-1.00029	0.183	0.284	1	8
Ets1	0.0934554	-1.0001	0.151	0.233	1	8
Haao	0.0850092	-0.999709	0.075	0.144	1	8
Mlf1	0.61947	-0.999623	0.011	0.019	1	8
Traf3ip2	0.286726	-0.999505	0.043	0.074	1	8
Zfp182	0.0743009	-0.999387	0.129	0.214	1	8
Fabp3	0.254798	-0.998851	0	0.014	1	8
Herc1	0.00714908	-0.998533	0.29	0.451	1	8
Ltb	0.0154264	-0.997563	0.194	0.33	1	8
Xpo4	0.136346	-0.997408	0.054	0.107	1	8
Gde1	0.973357	-0.997366	0.183	0.177	1	8
Rabep2	0.17005	-0.997274	0.065	0.116	1	8
Gbp5	0.380158	-0.996065	0.054	0.084	1	8
Zfp456	0.814584	-0.995353	0.011	0.014	1	8
Mterf1b	0.139656	-0.994492	0	0.023	1	8
Bola1	0.615782	-0.994159	0.086	0.107	1	8
Tmcc2	0.237933	-0.993732	0.022	0.051	1	8
Cds2	0.0143704	-0.993686	0.075	0.186	1	8
Sptan1	0.0421466	-0.993496	0.333	0.442	1	8
Tnfrsf8	0.670975	-0.992437	0.043	0.033	1	8
Pak3	0.254798	-0.991533	0	0.014	1	8
Castor1	0.190392	-0.991403	0.043	0.084	1	8
Napepld	0.244357	-0.99121	0.022	0.051	1	8
C130050O18Rik	0.0383866	-0.99117	0.108	0.209	1	8
Esyt2	0.00127978	-0.990183	0.183	0.367	1	8
Mmp23	0.276824	-0.989781	0.011	0.033	1	8
Atxn1	0.0307371	-0.989452	0.108	0.209	1	8
Kat2a	0.270177	-0.988357	0.011	0.033	1	8
Pglyrp2	0.23163	-0.987364	0.022	0.051	1	8
Tfrc	0.974068	-0.987146	0.097	0.098	1	8
Mcph1	0.294002	-0.986212	0.065	0.102	1	8
Gk	0.0372895	-0.985984	0.086	0.181	1	8
Pptc7	0.154503	-0.985758	0.14	0.205	1	8
Dbnl	0.00425786	-0.985451	0.28	0.442	1	8
Capn10	0.124902	-0.985439	0.011	0.047	1	8
Sptb	0.254798	-0.98527	0	0.014	1	8
F11r	0.290728	-0.985115	0.097	0.14	1	8
Ccnq	0.298698	-0.984852	0.043	0.074	1	8
Ppm1j	0.254798	-0.984816	0	0.014	1	8
Ggct	0.329385	-0.982853	0.183	0.237	1	8
Ccdc158	0.254798	-0.982835	0	0.014	1	8
Cdc45	0.254798	-0.982705	0	0.014	1	8
Gpbp1	0.0960638	-0.982577	0.29	0.381	1	8
Cbx7	0.309402	-0.982269	0.054	0.088	1	8
Ino80e	0.309799	-0.982153	0.129	0.172	1	8
Vezt	0.139384	-0.981554	0.032	0.079	1	8
Nkap	0.119799	-0.981329	0.161	0.237	1	8
Pms2	0.195049	-0.981167	0.032	0.07	1	8
Adarb1	0.254798	-0.980436	0	0.014	1	8
Ankdd1a	0.187414	-0.980306	0	0.019	1	8
Baz1b	0.135621	-0.979374	0.258	0.33	1	8
Dcp2	0.0713637	-0.979242	0.151	0.237	1	8
Naa35	0.308397	-0.979123	0.118	0.158	1	8
Cep85l	0.258106	-0.978817	0.161	0.209	1	8
Vps37c	0.109407	-0.978706	0.054	0.112	1	8
Ak3	0.226513	-0.978406	0.086	0.135	1	8
Parp12	0.00745569	-0.977981	0.065	0.186	1	8
Slc39a10	0.255537	-0.97753	0.075	0.121	1	8
Asb5	0.187414	-0.975902	0	0.019	1	8
Tubgcp4	0.0581311	-0.975269	0.065	0.14	1	8
Lmnb1	0.68355	-0.975092	0.183	0.191	1	8
Ankrd44	3.62509e-05	-0.974869	0.634	0.786	0.599953	8
Gm49356	0.589366	-0.974663	0.022	0.033	1	8
Adgre4	0.000182735	-0.974358	0.527	0.707	1	8
Tshz1	0.813319	-0.974172	0.086	0.093	1	8
Prorsd1	0.336591	-0.974048	0.129	0.172	1	8
Acaca	0.138555	-0.973988	0.108	0.172	1	8
Wdr49	0.254798	-0.973851	0	0.014	1	8
Grap2	0.0297492	-0.973679	0.118	0.223	1	8
Gm3435	0.139656	-0.972943	0	0.023	1	8
Hps6	0.254798	-0.972923	0	0.014	1	8
Sec23ip	0.11472	-0.972401	0.043	0.098	1	8
Bcl2a1c	0.187414	-0.972249	0	0.019	1	8
Comtd1	0.110059	-0.971674	0.043	0.098	1	8
Rad9a	0.560473	-0.971385	0.086	0.065	1	8
Spry2	0.471883	-0.970873	0.022	0.037	1	8
Krt80	0.16686	-0.970754	0.183	0.242	1	8
Ppid	0.135286	-0.970008	0.108	0.177	1	8
Ctsw	0.0399062	-0.969921	0.043	0.121	1	8
Rasip1	0.254798	-0.96964	0	0.014	1	8
Clcc1	0.0620783	-0.969477	0.075	0.153	1	8
Acsbg1	0.187414	-0.968437	0	0.019	1	8
Mboat7	0.357706	-0.968426	0.108	0.14	1	8
Las1l	0.370611	-0.967685	0.086	0.121	1	8
Usp32	0.0229983	-0.967532	0.312	0.442	1	8
Plekha5	0.209677	-0.96713	0.054	0.098	1	8
Polg2	0.00311324	-0.967124	0.161	0.316	1	8
Pip4k2c	0.8309	-0.966759	0.108	0.098	1	8
Slc38a7	0.277962	-0.966484	0.043	0.074	1	8
Yeats2	0.47637	-0.965815	0.065	0.088	1	8
Nbeal2	0.139745	-0.965332	0.043	0.093	1	8
Rft1	0.520114	-0.964106	0.065	0.084	1	8
Tox2	0.47038	-0.963906	0.011	0.023	1	8
Il17rc	0.187414	-0.963192	0	0.019	1	8
Phex	0.187414	-0.96314	0	0.019	1	8
Zfand2a	0.113905	-0.962775	0.258	0.33	1	8
Arhgap24	0.776975	-0.962614	0.108	0.116	1	8
Insr	0.150042	-0.96251	0.204	0.274	1	8
Sap30bp	0.213909	-0.962027	0.14	0.191	1	8
Gm28305	0.254798	-0.961419	0	0.014	1	8
Epm2aip1	0.754148	-0.960979	0.097	0.107	1	8
Tgm3	0.187414	-0.960967	0	0.019	1	8
Il10rb	0.19387	-0.960656	0.032	0.07	1	8
Tcta	0.18471	-0.95945	0.022	0.056	1	8
Aamdc	0.72749	-0.959144	0.108	0.121	1	8
Proser1	0.0879194	-0.959012	0.075	0.144	1	8
C130026I21Rik	0.523534	-0.959006	0.054	0.074	1	8
Ager	0.623968	-0.958772	0.011	0.019	1	8
Abce1	0.429476	-0.958635	0.161	0.195	1	8
Ndufs3	0.218029	-0.958437	0.366	0.419	1	8
Cerkl	0.350339	-0.958383	0.011	0.028	1	8
Pias3	0.0683818	-0.958257	0.032	0.093	1	8
Tec	0.00592893	-0.957353	0.215	0.372	1	8
Plekha8	0.740416	-0.957141	0.022	0.028	1	8
Yars	0.0220909	-0.956431	0.032	0.116	1	8
Tk1	0.460773	-0.956356	0.022	0.037	1	8
Hddc2	0.149652	-0.955899	0.043	0.093	1	8
Zfp472	0.204497	-0.955858	0.043	0.084	1	8
Dnajc2	0.291248	-0.955564	0.226	0.284	1	8
Btbd7	0.0156592	-0.955561	0.29	0.423	1	8
Prrg1	0.308521	-0.954948	0.032	0.06	1	8
Dnmbp	0.755937	-0.954798	0.086	0.098	1	8
Spg7	0.258895	-0.953695	0.075	0.116	1	8
Lats2	0.368169	-0.953201	0.14	0.177	1	8
Pcif1	0.0808155	-0.952803	0.226	0.33	1	8
Fscn1	0.840215	-0.9524	0.043	0.037	1	8
Parp9	0.0240321	-0.952296	0.118	0.223	1	8
Grwd1	0.471883	-0.951483	0.022	0.037	1	8
Immp2l	0.0688769	-0.950667	0.097	0.181	1	8
Max	0.0295982	-0.950552	0.215	0.34	1	8
Ceacam1	0.0574075	-0.949999	0.204	0.307	1	8
Vps33b	0.185992	-0.949533	0.022	0.056	1	8
Hap1	0.46613	-0.949266	0.032	0.019	1	8
Trrap	0.122381	-0.948012	0.129	0.205	1	8
Slc35d1	0.161306	-0.948002	0.054	0.102	1	8
Slc4a5	0.547806	-0.947768	0.011	0.005	1	8
Klc4	0.298306	-0.947577	0.032	0.06	1	8
Atg12	0.000575343	-0.947456	0.129	0.312	1	8
Nme3	0.254798	-0.946424	0	0.014	1	8
Fpr2	0.330961	-0.946412	0.086	0.121	1	8
Chkb	0.977874	-0.946372	0.065	0.065	1	8
Yif1a	0.187489	-0.94636	0.108	0.163	1	8
Ccl8	0.890968	-0.945538	0.043	0.047	1	8
Nrf1	0.018529	-0.945135	0.215	0.344	1	8
Ppp1r7	0.211759	-0.944708	0.097	0.149	1	8
Sorbs1	0.45379	-0.944217	0.032	0.051	1	8
Stk35	0.197422	-0.943615	0.032	0.07	1	8
Pcbd2	0.0247376	-0.943584	0.258	0.367	1	8
Prkcg	0.191184	-0.943308	0.022	0.056	1	8
Zfp758	0.545786	-0.942984	0.032	0.047	1	8
Il1rapl2	0.254798	-0.942658	0	0.014	1	8
Rmnd5b	0.225802	-0.942388	0.086	0.14	1	8
Taf1a	0.379886	-0.941621	0.032	0.056	1	8
Snx27	0.0687118	-0.941364	0.129	0.219	1	8
Zfp947	0.350339	-0.941043	0.011	0.028	1	8
Fam120b	0.0796034	-0.940618	0.097	0.181	1	8
Cd320	0.254798	-0.940468	0	0.014	1	8
Nup210	0.211759	-0.940334	0.097	0.149	1	8
Carf	0.27238	-0.940178	0.011	0.033	1	8
Zbtb42	0.463251	-0.940168	0.011	0.023	1	8
Eif5b	0.0018986	-0.940045	0.333	0.521	1	8
Carm1	0.868761	-0.939933	0.108	0.112	1	8
Cnbd2	0.41384	-0.939761	0.108	0.14	1	8
Mrps25	0.216943	-0.939691	0.14	0.195	1	8
Osgin2	0.270932	-0.9395	0.108	0.153	1	8
Btbd19	0.467873	-0.938751	0.032	0.051	1	8
Tmed4	0.0903914	-0.938737	0.075	0.149	1	8
Immt	0.102982	-0.938404	0.204	0.293	1	8
Skap1	0.0897076	-0.938121	0.097	0.172	1	8
Ezr	0.207406	-0.937496	0.376	0.437	1	8
Dnlz	0.932075	-0.93662	0.086	0.088	1	8
Rnf213	4.31745e-06	-0.936374	0.183	0.442	0.0714538	8
6030468B19Rik	0.47038	-0.935817	0.011	0.023	1	8
Slc25a30	0.250309	-0.935286	0.097	0.149	1	8
Dguok	0.0239786	-0.935167	0.237	0.363	1	8
Slc30a9	0.0617971	-0.934713	0.086	0.167	1	8
Fhip1b	0.28417	-0.934553	0.097	0.14	1	8
Zcchc10	0.0180648	-0.934175	0.022	0.102	1	8
Kcnj8	0.187414	-0.934022	0	0.019	1	8
Asrgl1	0.0794921	-0.933349	0.075	0.149	1	8
Dhx58	0.0794715	-0.93327	0.054	0.121	1	8
Sh3bp5	0.0243583	-0.932702	0.14	0.251	1	8
Pank2	0.245731	-0.931777	0.161	0.223	1	8
Gpbp1l1	0.234209	-0.931489	0.237	0.307	1	8
Tdrd7	0.311374	-0.930867	0.14	0.181	1	8
Maf	0.0594923	-0.930417	0.14	0.233	1	8
Slc4a2	0.185992	-0.929437	0.022	0.056	1	8
Neurl3	0.148869	-0.92868	0.398	0.447	1	8
Fndc3a	0.000277773	-0.928391	0.419	0.614	1	8
Eif4ebp2	0.00581491	-0.9282	0.258	0.433	1	8
Wdfy1	0.0565772	-0.927818	0.129	0.228	1	8
Plcg1	0.948963	-0.927756	0.043	0.042	1	8
Zfp142	0.192499	-0.926558	0.022	0.056	1	8
Mapk8ip3	0.385129	-0.925877	0.097	0.135	1	8
Eny2	0.495864	-0.924581	0.312	0.33	1	8
Dxo	0.551914	-0.923561	0.075	0.056	1	8
Itgal	0.000525114	-0.923174	0.559	0.74	1	8
Sema4b	0.852134	-0.92255	0.032	0.037	1	8
Get3	0.552015	-0.921692	0.14	0.172	1	8
B3gnt2	1	-0.921415	0.032	0.033	1	8
Ints11	0.257786	-0.920715	0.075	0.116	1	8
Dynlt1b	0.133374	-0.920663	0.032	0.079	1	8
S1pr5	0.540041	-0.920448	0.043	0.06	1	8
Entpd6	0.132532	-0.9203	0.032	0.079	1	8
Igip	0.46631	-0.920013	0.022	0.037	1	8
Fam110a	0.294952	-0.919939	0.032	0.06	1	8
Fam76b	0.15627	-0.919588	0.161	0.237	1	8
Tmx2	0.284417	-0.9192	0.054	0.088	1	8
Tbck	0.0808223	-0.918471	0.129	0.214	1	8
Grk6	0.487644	-0.918348	0.161	0.186	1	8
Zfp608	0.174851	-0.918109	0.194	0.26	1	8
Dram2	0.17689	-0.91754	0.29	0.367	1	8
Klf12	0.162117	-0.917523	0.011	0.042	1	8
Card9	0.419315	-0.91731	0.108	0.14	1	8
8030462N17Rik	0.143404	-0.916982	0.161	0.233	1	8
Laptm4b	0.366644	-0.916712	0.043	0.023	1	8
Trp53bp2	0.145897	-0.916324	0.086	0.149	1	8
Tor4a	0.315698	-0.915956	0.043	0.074	1	8
Pde4a	0.214698	-0.914716	0.043	0.084	1	8
N4bp2l1	0.0057622	-0.914464	0.194	0.344	1	8
Parp11	0.073937	-0.914219	0.075	0.153	1	8
Ly6e	1.69505e-08	-0.913459	0.731	0.823	0.000280531	8
Tut1	0.354091	-0.913428	0.032	0.056	1	8
Ltv1	0.222051	-0.912682	0.161	0.223	1	8
Ccnf	0.47038	-0.91245	0.011	0.023	1	8
Dhrs9	0.192499	-0.912441	0.022	0.056	1	8
Cpne8	0.254798	-0.912372	0	0.014	1	8
Pofut1	0.36326	-0.910798	0.065	0.098	1	8
Manba	0.104797	-0.910485	0.097	0.167	1	8
Elmo2	0.00516224	-0.909983	0.204	0.363	1	8
Pctp	0.207857	-0.909977	0.043	0.084	1	8
Fbxo28	0.222438	-0.909925	0.183	0.242	1	8
Stn1	0.355177	-0.909683	0.097	0.135	1	8
Iqcn	0.187414	-0.909167	0	0.019	1	8
Pdha1	0.115217	-0.909014	0.258	0.34	1	8
Cxcr6	0.197422	-0.909004	0.032	0.07	1	8
Slc12a2	0.14714	-0.908747	0.086	0.144	1	8
Ankrd40	0.179159	-0.908634	0.097	0.153	1	8
H4c14	0.0750344	-0.907301	0.011	0.056	1	8
Csrnp2	0.124902	-0.907281	0.011	0.047	1	8
Phyh	0.00860761	-0.906822	0.129	0.265	1	8
Snip1	0.0796551	-0.90573	0.065	0.135	1	8
Fbxo4	0.137521	-0.905691	0.151	0.228	1	8
Synj2	0.553794	-0.905343	0.032	0.047	1	8
Gxylt1	0.0342272	-0.904796	0.151	0.265	1	8
Nfya	0.41346	-0.904603	0.161	0.205	1	8
Mthfd1l	0.3257	-0.90426	0.129	0.172	1	8
6030458C11Rik	0.242739	-0.903883	0.022	0.051	1	8
Mtch2	0.246468	-0.903731	0.183	0.242	1	8
Guca1b	0.254798	-0.903697	0	0.014	1	8
Ptpn22	0.0151234	-0.903523	0.312	0.451	1	8
Zfp429	0.105858	-0.90349	0.032	0.084	1	8
Ehmt2	0.0353191	-0.902585	0.14	0.251	1	8
Trafd1	0.0222857	-0.902511	0.258	0.391	1	8
Trappc8	0.0401426	-0.90174	0.204	0.321	1	8
Stambp	0.714508	-0.90104	0.097	0.107	1	8
Lpar5	0.254798	-0.900768	0	0.014	1	8
Ugdh	0.405971	-0.900631	0.065	0.093	1	8
Ctcf	0.17131	-0.900056	0.301	0.372	1	8
Tnfrsf10b	0.466808	-0.899903	0.011	0.023	1	8
Stat4	0.183948	-0.899445	0.129	0.191	1	8
Tmem156	0.0615215	-0.899206	0.065	0.14	1	8
Zfp81	0.872686	-0.899147	0.043	0.047	1	8
Tnrc18	0.15324	-0.898867	0.355	0.423	1	8
Cstf3	0.129501	-0.898802	0.14	0.209	1	8
Itpk1	0.581253	-0.898684	0.204	0.219	1	8
Lin28b	0.254798	-0.898337	0	0.014	1	8
Ryr1	0.307834	-0.898042	0.108	0.149	1	8
Akna	0.234961	-0.897717	0.237	0.288	1	8
Habp4	0.83372	-0.896957	0.043	0.037	1	8
Ublcp1	0.736888	-0.896282	0.129	0.112	1	8
Nedd4l	0.00495129	-0.895258	0.204	0.372	1	8
Hacd4	0.0849576	-0.895041	0.172	0.256	1	8
Dctn6	0.163833	-0.894919	0.129	0.2	1	8
Zfp281	0.0743786	-0.894323	0.022	0.074	1	8
Dmap1	0.477493	-0.893759	0.022	0.037	1	8
Zpr1	0.178414	-0.893742	0.108	0.177	1	8
Ubqln1	0.0317156	-0.892759	0.237	0.358	1	8
Eid2	0.254798	-0.892738	0	0.014	1	8
Zfp280d	0.244949	-0.892393	0.204	0.251	1	8
Atmin	0.813881	-0.892286	0.086	0.079	1	8
Yipf6	0.351542	-0.892216	0.075	0.112	1	8
Ppie	0.0111259	-0.891995	0.086	0.209	1	8
Tincr	0.254798	-0.891511	0	0.014	1	8
Cnep1r1	0.184872	-0.890807	0.086	0.14	1	8
Alg14	0.134203	-0.89042	0.043	0.093	1	8
Flt1	0.37175	-0.889966	0.172	0.209	1	8
Meis3	0.547806	-0.889957	0.011	0.005	1	8
Tnrc6a	0.0330059	-0.889801	0.312	0.409	1	8
Tdrp	0.124902	-0.88939	0.011	0.047	1	8
Fam118a	0.355937	-0.888886	0.011	0.028	1	8
Trim12c	0.0439352	-0.888197	0.129	0.228	1	8
B3gntl1	0.1949	-0.888114	0.065	0.112	1	8
St3gal2	0.197713	-0.887603	0.065	0.112	1	8
Pot1b	0.00221253	-0.887489	0.398	0.595	1	8
Glipr2	0.170119	-0.887298	0.14	0.2	1	8
Stard3	0.0280556	-0.886668	0.14	0.247	1	8
Cryl1	0.380927	-0.88665	0.097	0.13	1	8
Smim36	0.0817865	-0.88585	0.054	0.121	1	8
Tmem101	0.235422	-0.885617	0.043	0.079	1	8
C2cd2l	0.465509	-0.885386	0.032	0.051	1	8
Slc25a46	0.0756878	-0.885261	0.086	0.163	1	8
Atpaf1	0.157447	-0.884995	0.032	0.074	1	8
Adgrl1	0.254798	-0.884519	0	0.014	1	8
Kctd1	0.160758	-0.884316	0.011	0.042	1	8
Psma1	0.0021158	-0.884228	0.344	0.502	1	8
Dnpep	0.919205	-0.883752	0.097	0.102	1	8
Tnfrsf12a	0.828411	-0.883734	0.032	0.037	1	8
Dhrs7	0.167291	-0.883549	0.194	0.26	1	8
Map3k7	0.0891876	-0.882987	0.194	0.284	1	8
Gpr19	0.725187	-0.882696	0.022	0.028	1	8
Dnajc28	0.918304	-0.882092	0.022	0.023	1	8
E430018J23Rik	0.254798	-0.881761	0	0.014	1	8
Tanc1	0.435467	-0.881709	0.043	0.065	1	8
Lcor	0.0483823	-0.881515	0.312	0.423	1	8
Map4k2	0.275553	-0.881188	0.086	0.13	1	8
Lsm6	0.0244001	-0.880423	0.237	0.363	1	8
Zfp426	1	-0.878742	0.075	0.074	1	8
[truncated: 8,500 more rows]

## Sheet: WT ECTV vs Ifna ECTV clu2-NK
	p_val	avg_log2FC	pct.1	pct.2	p_val_adj	cluster		high in WT ECTV 1 dpi (-)	high in Ifna ko ECTV 1 dpi (+)
Klhl9	7.3313e-19	-7.34472	0	0.072	1.21333e-14	2
Nbea	4.11608e-64	-5.82578	0.008	0.261	6.81212e-60	2
H2ac24	8.81336e-56	-4.61406	0.011	0.239	1.45861e-51	2
Zfp973	0.000372496	-3.65009	0.001	0.015	1	2
Taf9	0.00475106	-3.32962	0.001	0.01	1	2
Pawr	1.89103e-05	-3.13886	0.003	0.025	0.312965	2
4930558K02Rik	0.000377992	-3.03451	0.001	0.015	1	2
H2bc24	1.32305e-07	-3.03334	0.006	0.04	0.00218964	2
Gfra1	0.0866244	-2.94606	0.004	0.01	1	2
Inka2	0.0156137	-2.8381	0.002	0.01	1	2
Plcd3	4.40558e-08	-2.83477	0.005	0.04	0.000729123	2
Uba52	2.39739e-284	-2.78403	0.609	0.985	3.96767e-280	2
Epb41l5	0.0156137	-2.77362	0.002	0.01	1	2
Gstp1	5.50058e-47	-2.73523	0.046	0.282	9.10346e-43	2
Rhod	0.000608349	-2.71294	0.004	0.02	1	2
Klhl17	0.00467236	-2.70212	0.002	0.012	1	2
Tacstd2	0.015774	-2.69533	0.002	0.01	1	2
Or2w1b	0.015774	-2.69403	0.002	0.01	1	2
Dnal1	0.0232598	-2.68043	0.003	0.011	1	2
Nherf2	0.0085656	-2.62347	0.002	0.011	1	2
Zmat4	0.0129581	-2.61958	0.003	0.012	1	2
Ifitm2	0.0124998	-2.60893	0.007	0.019	1	2
Il31ra	2.91391e-48	-2.56456	0.057	0.306	4.82252e-44	2
Kctd16	0.0401499	-2.48847	0.003	0.01	1	2
H60b	0.00482869	-2.42782	0.001	0.01	1	2
Srp54b	0.0046807	-2.42439	0.002	0.012	1	2
Mboat2	0.0441009	-2.41473	0.006	0.015	1	2
Garin4	0.0611749	-2.3727	0.005	0.012	1	2
Bcar1	0.0158008	-2.34181	0.002	0.01	1	2
Tnnt3	0.015774	-2.33211	0.002	0.01	1	2
Phldb1	0.0156936	-2.33122	0.002	0.01	1	2
Ankrd33b	0.0379651	-2.27794	0.005	0.013	1	2
Bivm	0.0230181	-2.26662	0.003	0.011	1	2
Plpp1	0.0130384	-2.24909	0.003	0.012	1	2
Lrch4	4.23335e-08	-2.24878	0.007	0.045	0.00070062	2
H4c18	7.81406e-31	-2.2307	0.04	0.211	1.29323e-26	2
Or13a27	0.0179057	-2.14569	0.004	0.013	1	2
Myom1	0.0994508	-2.11218	0.005	0.011	1	2
Ccdc18	0.0514857	-2.1083	0.004	0.011	1	2
Dnaaf2	0.00469741	-2.108	0.002	0.012	1	2
Raver1	0.000111968	-2.03873	0.004	0.023	1	2
Spaca1	0.0158277	-2.03507	0.002	0.01	1	2
Pnp2	0.00139631	-2.03466	0.002	0.015	1	2
Rnasek	5.51455e-05	-2.01923	0.005	0.027	0.912657	2
Dynlt1a	0.000358383	-1.99922	0.013	0.038	1	2
Aldh1b1	0.0303409	-1.98029	0.004	0.012	1	2
Gins1	0.000120156	-1.96804	0.007	0.029	1	2
Sgce	0.00744488	-1.94611	0.003	0.013	1	2
Armcx1	0.0307086	-1.92723	0.004	0.012	1	2
Mc1r	0.00870112	-1.92504	0.002	0.011	1	2
B3galt5	0.00101784	-1.9172	0.007	0.025	1	2
Gpr15	0.000539523	-1.90639	0.005	0.022	1	2
Itga3	0.0234338	-1.89949	0.003	0.011	1	2
Pfkfb1	0.00600713	-1.88973	0.004	0.016	1	2
Sele	0.0016753	-1.88697	0.007	0.023	1	2
Septin8	0.013703	-1.87595	0.005	0.016	1	2
Kpna2	0.000167197	-1.86348	0.009	0.034	1	2
Mapkapk5	0.00278484	-1.86184	0.007	0.022	1	2
Lyz1	0.100988	-1.84006	0.005	0.011	1	2
Bcl2a1d	5.71971e-08	-1.8186	0.042	0.105	0.000946613	2
Tlr7	0.0132002	-1.79271	0.003	0.012	1	2
Cdk1	0.0407301	-1.77556	0.003	0.01	1	2
Hemk1	0.0180056	-1.76674	0.004	0.013	1	2
Cep290	0.11165	-1.7585	0.006	0.012	1	2
Atp6v0d2	0.0864149	-1.75098	0.004	0.01	1	2
Cdc42ep1	0.0232945	-1.74733	0.003	0.011	1	2
Jag1	0.0232945	-1.74556	0.003	0.011	1	2
Pla2g4a	0.0448015	-1.73845	0.006	0.015	1	2
Zfp462	0.00345183	-1.7334	0.004	0.017	1	2
Slc24a1	0.00349555	-1.72211	0.008	0.023	1	2
Ass1	0.0922189	-1.71754	0.008	0.017	1	2
Hcar2	0.0407885	-1.69633	0.003	0.01	1	2
Shc4	0.0863103	-1.68352	0.004	0.01	1	2
H2ac18	7.91571e-14	-1.68166	0.043	0.139	1.31005e-09	2
Dok5	0.0407301	-1.67724	0.003	0.01	1	2
Phldb2	0.0381506	-1.66453	0.005	0.013	1	2
Hpgds	0.00110256	-1.66202	0.014	0.037	1	2
Apoe	0.00134574	-1.65596	0.019	0.044	1	2
Dynlt1c	0.00317462	-1.65214	0.009	0.027	1	2
Ahcy	0.0277773	-1.64962	0.006	0.016	1	2
Il18	0.170141	-1.62773	0.006	0.011	1	2
Nme2	2.6427e-13	-1.62081	0.046	0.141	4.37367e-09	2
Gm49383	0.0407301	-1.61107	0.003	0.01	1	2
H2ac8	2.28542e-07	-1.60946	0.037	0.093	0.00378236	2
Morn3	0.00275354	-1.60484	0.011	0.03	1	2
Gm14399	0.0518822	-1.60435	0.004	0.011	1	2
H2ac13	8.34591e-06	-1.56069	0.015	0.05	0.138125	2
Fsd2	0.0875724	-1.55894	0.004	0.01	1	2
Maskbp3	0.0620338	-1.55586	0.005	0.012	1	2
Gm3435	0.00937615	-1.54414	0.008	0.021	1	2
Mt1	0.000423608	-1.52427	0.021	0.049	1	2
Abhd6	0.00135783	-1.51062	0.02	0.045	1	2
Rec8	0.17402	-1.50739	0.006	0.011	1	2
Adgrb3	0.0232398	-1.49526	0.005	0.015	1	2
Atp6v0a1	0.0370434	-1.49271	0.008	0.018	1	2
Tgif2	1.13403e-05	-1.48682	0.022	0.06	0.187682	2
Osgin1	0.0111965	-1.48289	0.008	0.022	1	2
Nfam1	0.0522812	-1.4795	0.004	0.011	1	2
Lamc1	0.0372348	-1.4738	0.008	0.018	1	2
Stil	0.385858	-1.46259	0.007	0.01	1	2
Sema3c	0.0361524	-1.46182	0.011	0.023	1	2
1810009A15Rik	3.51638e-07	-1.45568	0.016	0.059	0.00581961	2
Proca1	0.00277114	-1.45476	0.005	0.019	1	2
Dynlt1b	2.27476e-06	-1.4533	0.012	0.048	0.0376473	2
Slc39a4	0.0237259	-1.42288	0.011	0.025	1	2
H2ac6	3.2123e-05	-1.40242	0.03	0.07	0.531635	2
Map3k15	0.058232	-1.40084	0.008	0.017	1	2
Ttbk2	0.260062	-1.39151	0.006	0.01	1	2
2510009E07Rik	0.160527	-1.39129	0.005	0.01	1	2
Aarsd1	0.000813087	-1.39104	0.008	0.027	1	2
Smim35	0.00386682	-1.38281	0.01	0.028	1	2
Bahcc1	0.0143755	-1.37153	0.036	0.058	1	2
Rgs9	0.0310386	-1.37069	0.004	0.012	1	2
Faap100	0.00614368	-1.37068	0.014	0.032	1	2
Fam72a	0.00864065	-1.35614	0.002	0.011	1	2
Zfp972	0.0384302	-1.35601	0.005	0.013	1	2
Rbm11	0.0311216	-1.3515	0.004	0.012	1	2
Nnat	0.160139	-1.33642	0.012	0.02	1	2
Tsacc	0.00134106	-1.33099	0.012	0.034	1	2
Fabp5	0.489343	-1.32953	0.025	0.03	1	2
Padi4	0.00607768	-1.32668	0.01	0.027	1	2
Agbl1	0.262317	-1.32403	0.006	0.01	1	2
Areg	0.622826	-1.32044	0.014	0.017	1	2
Lpar5	0.0233581	-1.31787	0.005	0.015	1	2
Zfr2	0.0455114	-1.31489	0.006	0.015	1	2
Bcs1l	0.00373842	-1.3138	0.023	0.046	1	2
Ptp4a1	7.38943e-08	-1.30153	0.039	0.1	0.00122295	2
Sytl1	0.0041642	-1.29085	0.014	0.034	1	2
Vegfa	1.83207e-07	-1.29061	0.116	0.196	0.00303208	2
Bambi	0.000818329	-1.29016	0.036	0.069	1	2
Dll1	0.18492	-1.28966	0.007	0.012	1	2
Myo1b	0.0673569	-1.28871	0.009	0.019	1	2
Stk11ip	0.0242085	-1.2868	0.017	0.032	1	2
Ccdc136	0.0521479	-1.28643	0.004	0.011	1	2
Grcc10	1.53627e-29	-1.28058	0.179	0.413	2.54253e-25	2
Sytl3	1.22211e-53	-1.27157	0.638	0.871	2.0226e-49	2
Sbk2	0.101098	-1.26696	0.005	0.011	1	2
Fcsk	0.0129983	-1.26042	0.007	0.019	1	2
Pak1	1.95322e-06	-1.25671	0.03	0.078	0.0323258	2
Krba1	0.103812	-1.25274	0.01	0.019	1	2
Slc43a3	0.0578335	-1.25201	0.008	0.017	1	2
Spi1	0.271805	-1.251	0.007	0.011	1	2
Dock4	1.62235e-05	-1.24945	0.052	0.103	0.268498	2
Utf1	0.000170313	-1.24329	0.016	0.045	1	2
Fam110a	0.00013971	-1.22567	0.034	0.072	1	2
Aldh4a1	0.0301057	-1.22508	0.009	0.021	1	2
Sh2d4b	0.113006	-1.2223	0.006	0.012	1	2
Tmem51	0.000640324	-1.22026	0.023	0.053	1	2
Pabpc1l	0.184117	-1.21865	0.007	0.012	1	2
Bcl2l15	0.0874667	-1.21557	0.004	0.01	1	2
Thrb	0.0106527	-1.21339	0.021	0.04	1	2
Tmsb15l	1.35561e-05	-1.21175	0.034	0.078	0.224353	2
Spata24	0.00251469	-1.21152	0.01	0.029	1	2
Hmga1	5.15477e-06	-1.2115	0.024	0.067	0.0853114	2
Zc2hc1c	0.00612374	-1.20737	0.004	0.016	1	2
P2rx3	0.159873	-1.20084	0.005	0.01	1	2
Zbtb46	1.66636e-08	-1.1933	0.101	0.187	0.000275782	2
Gpr55	0.0154439	-1.19201	0.008	0.02	1	2
Cfap45	0.0410816	-1.18914	0.003	0.01	1	2
Ogfod3	0.00775064	-1.18585	0.012	0.029	1	2
Erh	5.34258e-28	-1.18389	0.211	0.437	8.84197e-24	2
Zfp850	0.0221739	-1.17285	0.01	0.023	1	2
Cd93	0.0718159	-1.17181	0.006	0.013	1	2
Zfp821	0.00336938	-1.17077	0.009	0.027	1	2
Crb3	0.0460243	-1.16986	0.006	0.015	1	2
Fam184b	0.00338644	-1.16962	0.012	0.031	1	2
Fbxo47	0.090299	-1.169	0.008	0.016	1	2
Gata6	0.174837	-1.16811	0.006	0.011	1	2
Slc6a13	0.0631215	-1.16734	0.005	0.012	1	2
Pik3r6	0.122404	-1.16356	0.007	0.013	1	2
mt-Atp8	1.07499e-43	-1.1616	0.36	0.647	1.77911e-39	2
Rpl35	2.82847e-126	-1.15868	0.89	0.979	4.68112e-122	2
Zfp963	0.112779	-1.15752	0.006	0.012	1	2
Ak8	0.0133655	-1.15691	0.009	0.023	1	2
Slc26a10	0.0130908	-1.1529	0.007	0.019	1	2
Myl4	0.0010149	-1.152	0.016	0.04	1	2
Nlrc4	0.0451553	-1.15044	0.006	0.015	1	2
Ifi27l2a	8.7988e-07	-1.14996	0.029	0.078	0.014562	2
Ppp1r3e	0.0365378	-1.14939	0.011	0.023	1	2
Pter	0.0726935	-1.14634	0.01	0.02	1	2
Ranbp3l	0.1602	-1.14574	0.005	0.01	1	2
Nusap1	0.201016	-1.13816	0.008	0.015	1	2
Atp6v1g2	0.00760992	-1.13773	0.016	0.035	1	2
Mthfsd	0.000280911	-1.13719	0.027	0.06	1	2
Ccdc40	0.0525487	-1.13208	0.004	0.011	1	2
Zkscan5	0.046055	-1.12932	0.015	0.028	1	2
Ltbp3	0.159709	-1.12739	0.005	0.01	1	2
Zfp946	0.0130565	-1.12585	0.013	0.029	1	2
P3h1	0.159546	-1.12259	0.005	0.01	1	2
Tmsb10b	2.31508e-10	-1.11664	0.086	0.182	3.83145e-06	2
H4c8	2.03518e-07	-1.11617	0.056	0.123	0.00336821	2
Zfp882	0.160691	-1.11507	0.005	0.01	1	2
Abcb8	0.105523	-1.115	0.01	0.019	1	2
Pde7b	0.0155129	-1.11436	0.008	0.02	1	2
mt-Nd4l	8.2639e-60	-1.1126	0.544	0.801	1.36768e-55	2
Aph1b	0.160527	-1.1055	0.005	0.01	1	2
Cand2	0.0389	-1.10466	0.005	0.013	1	2
Cacna1d	0.184759	-1.10437	0.007	0.012	1	2
Aph1c	0.0639963	-1.1031	0.008	0.018	1	2
Impg1	0.0334937	-1.10278	0.01	0.022	1	2
Polr2l	3.21198e-10	-1.09937	0.079	0.173	5.31582e-06	2
Rcan1	0.0221854	-1.09384	0.015	0.03	1	2
Ninj2	0.0883937	-1.09213	0.008	0.016	1	2
Hdgfl3	0.0372723	-1.09185	0.031	0.049	1	2
Pheta1	0.160527	-1.09113	0.005	0.01	1	2
Cep112	0.390385	-1.08977	0.007	0.01	1	2
Trip10	0.0361524	-1.08838	0.011	0.023	1	2
Epas1	0.014527	-1.08832	0.01	0.025	1	2
Cchcr1	0.0836457	-1.08302	0.013	0.023	1	2
Rps18-ps6	0.00297686	-1.08197	0.011	0.03	1	2
Tlcd3a	0.0109437	-1.08031	0.011	0.027	1	2
Pxdc1	0.0239552	-1.07819	0.008	0.019	1	2
Slc25a23	0.119346	-1.07569	0.013	0.022	1	2
Avil	0.0388528	-1.07046	0.005	0.013	1	2
Retsat	0.160139	-1.07025	0.012	0.02	1	2
Ctla2b	1.42165e-12	-1.06898	0.111	0.232	2.35283e-08	2
Tubb6	0.221583	-1.0675	0.015	0.022	1	2
Dbn1	0.0885581	-1.06542	0.008	0.016	1	2
Arhgef28	0.392375	-1.06372	0.007	0.01	1	2
Zfp58	0.113803	-1.06331	0.006	0.012	1	2
Thnsl1	0.0349399	-1.05976	0.017	0.031	1	2
Prr7	4.41731e-08	-1.05924	0.139	0.232	0.000731065	2
Lmln	0.052952	-1.05326	0.004	0.011	1	2
Fbxw17	0.00770548	-1.04401	0.016	0.035	1	2
Xlr3b	0.0232694	-1.04307	0.005	0.015	1	2
Ramp3	0.174673	-1.0418	0.006	0.011	1	2
Ccl27a	0.0338234	-1.03993	0.027	0.045	1	2
H4c1	0.00521493	-1.03938	0.027	0.051	1	2
Bcl2a1b	0.000266766	-1.03773	0.136	0.197	1	2
Gm37988	0.0726627	-1.03734	0.006	0.013	1	2
Mmab	0.0201147	-1.03438	0.013	0.028	1	2
Lyz2	7.08237e-05	-1.03397	0.041	0.085	1	2
Slc41a3	0.00839442	-1.02997	0.009	0.025	1	2
Dusp4	0.212842	-1.02844	0.011	0.018	1	2
Plk4	2.87748e-05	-1.02672	0.035	0.078	0.476223	2
Glis2	0.0583462	-1.0258	0.008	0.017	1	2
Siah1b	0.0586901	-1.01856	0.008	0.017	1	2
Slx1b	0.00808249	-1.01183	0.022	0.043	1	2
Kctd12b	0.069955	-1.01141	0.009	0.019	1	2
Arhgap31	1.96533e-07	-1.011	0.113	0.196	0.00325261	2
Grik5	0.038048	-1.01014	0.008	0.018	1	2
Neurl2	0.185564	-1.00859	0.007	0.012	1	2
Mical2	0.0963493	-1.00597	0.018	0.029	1	2
Ank1	0.274208	-1.00403	0.007	0.011	1	2
Adrb1	0.159698	-1.00324	0.012	0.02	1	2
Med16	0.00666831	-0.995293	0.035	0.06	1	2
Cenps	0.0581179	-0.987899	0.008	0.017	1	2
Wdr89	1.8721e-16	-0.987195	0.18	0.345	3.09832e-12	2
Serf1	0.0506781	-0.98272	0.01	0.021	1	2
Mocs3	0.011845	-0.979286	0.023	0.043	1	2
Phb	2.5257e-09	-0.976742	0.093	0.186	4.18004e-05	2
H2ac7	0.124708	-0.975762	0.007	0.013	1	2
Tns1	0.1332	-0.975474	0.008	0.015	1	2
Slc7a7	0.0811551	-0.975338	0.007	0.015	1	2
Dnajb5	0.0595048	-0.975333	0.013	0.025	1	2
Slc35g1	0.0198849	-0.975239	0.013	0.028	1	2
Ropn1l	0.175	-0.962309	0.006	0.011	1	2
Lins1	0.0489664	-0.958745	0.017	0.03	1	2
Rtl8b	0.00440321	-0.958421	0.018	0.039	1	2
Kirrel3	0.16102	-0.956462	0.005	0.01	1	2
Abhd4	0.0039928	-0.956417	0.017	0.038	1	2
C9orf72	0.00135422	-0.954377	0.033	0.064	1	2
Poln	0.0145463	-0.953843	0.027	0.048	1	2
Rdh5	0.160527	-0.953791	0.005	0.01	1	2
Gm20537	0.00971787	-0.953572	0.008	0.021	1	2
Gcnt2	0.000106498	-0.951561	0.044	0.087	1	2
Prune2	0.272677	-0.950944	0.007	0.011	1	2
Chrne	0.0149608	-0.948262	0.026	0.047	1	2
Cox16	3.83411e-11	-0.94767	0.102	0.211	6.34545e-07	2
Grik1	0.00374194	-0.945624	0.016	0.037	1	2
Exosc9	9.00936e-05	-0.941475	0.06	0.109	1	2
Fgd6	0.0122147	-0.941067	0.023	0.043	1	2
U2af1l4	0.0146872	-0.940456	0.01	0.025	1	2
Ralb	0.163984	-0.940362	0.014	0.022	1	2
Suv39h2	0.29435	-0.937061	0.011	0.017	1	2
Chml	0.288366	-0.936216	0.008	0.013	1	2
Stx2	0.0161307	-0.933971	0.033	0.055	1	2
Ttll1	0.0384404	-0.930177	0.008	0.018	1	2
Tmem88	0.0157582	-0.928234	0.015	0.031	1	2
Tmem191	0.0144203	-0.926809	0.02	0.038	1	2
Il4i1	0.511082	-0.923532	0.011	0.015	1	2
Spaca6	0.202413	-0.923371	0.008	0.015	1	2
Chst15	0.392756	-0.921884	0.008	0.011	1	2
Plxdc1	0.125989	-0.920778	0.007	0.013	1	2
Gpr63	0.131617	-0.920714	0.02	0.03	1	2
Zfp974	0.017698	-0.916555	0.017	0.034	1	2
Adgrl2	0.621683	-0.916104	0.015	0.018	1	2
Kif27	0.202413	-0.915873	0.008	0.015	1	2
Tbc1d19	0.293338	-0.915207	0.01	0.016	1	2
Gm7030	0.0339644	-0.913942	0.016	0.03	1	2
Ung	0.00770719	-0.912204	0.021	0.041	1	2
Hspe1-rs1	0.0652869	-0.906109	0.015	0.027	1	2
Zfp580	0.101764	-0.905492	0.005	0.011	1	2
Nacc2	0.0966993	-0.904668	0.008	0.017	1	2
Cln8	0.279223	-0.904294	0.008	0.012	1	2
Ap5s1	0.00567948	-0.901889	0.016	0.036	1	2
Ccdc112	0.16102	-0.899966	0.005	0.01	1	2
Plekhh3	0.262091	-0.899451	0.006	0.01	1	2
Mocs1	0.0166674	-0.899194	0.016	0.032	1	2
Kif9	0.207968	-0.892228	0.009	0.016	1	2
Krt83	0.131907	-0.891623	0.023	0.035	1	2
Slc25a47	0.114833	-0.888726	0.006	0.012	1	2
Acat2	0.000819839	-0.88774	0.037	0.07	1	2
Marveld2	0.0101735	-0.886409	0.024	0.046	1	2
Nanos3	0.0744218	-0.883613	0.01	0.02	1	2
Pcgf2	0.0407217	-0.882397	0.022	0.037	1	2
Kifc5b	0.170816	-0.881687	0.016	0.025	1	2
Maff	1.058e-05	-0.879751	0.091	0.155	0.175099	2
Plcl1	0.0465542	-0.879099	0.009	0.02	1	2
Il18bp	0.161513	-0.877186	0.005	0.01	1	2
Bloc1s1	7.45972e-12	-0.87603	0.098	0.211	1.23458e-07	2
Mettl2	0.00747004	-0.875421	0.035	0.06	1	2
Cdkn1a	0.000113864	-0.874797	0.078	0.13	1	2
Hmgn2	1.43752e-12	-0.874543	0.181	0.321	2.37909e-08	2
Mlf1	0.0190983	-0.873148	0.025	0.045	1	2
Pygm	0.12436	-0.871518	0.007	0.013	1	2
Odc1	8.47761e-07	-0.870352	0.331	0.441	0.0140304	2
Pate2	0.101431	-0.869375	0.005	0.011	1	2
Gm20422	0.281328	-0.868849	0.008	0.012	1	2
Pdgfa	0.10232	-0.868685	0.005	0.011	1	2
Sfmbt2	0.125289	-0.866983	0.007	0.013	1	2
Mfsd4b4	0.0734396	-0.866946	0.006	0.013	1	2
Rrm2	0.113574	-0.866452	0.006	0.012	1	2
Slc25a29	0.539872	-0.866324	0.008	0.01	1	2
Kif13a	0.0796465	-0.864018	0.011	0.021	1	2
Aqp9	0.0507673	-0.862892	0.01	0.021	1	2
Oas1a	0.00600924	-0.861584	0.022	0.044	1	2
4931406C07Rik	0.0127933	-0.86125	0.017	0.035	1	2
Degs2	0.177445	-0.860846	0.018	0.027	1	2
Vmn2r84	0.14041	-0.860662	0.008	0.016	1	2
2810459M11Rik	0.000531632	-0.860238	0.041	0.078	1	2
Zfp747	0.291027	-0.859664	0.009	0.015	1	2
P2rx7	0.273551	-0.858675	0.007	0.011	1	2
Ppp1r3f	0.287346	-0.857863	0.008	0.013	1	2
Rwdd2b	0.121778	-0.855433	0.014	0.023	1	2
Nutf2	0.0372537	-0.854634	0.011	0.023	1	2
C1qtnf12	0.545501	-0.850621	0.008	0.01	1	2
Rab3a	0.214567	-0.850038	0.011	0.018	1	2
Cd63	0.274208	-0.847915	0.007	0.011	1	2
Mcub	0.0314135	-0.847426	0.004	0.012	1	2
Adgrv1	0.11166	-0.845489	0.011	0.02	1	2
Polq	0.542517	-0.84295	0.008	0.01	1	2
Nrip3	0.16102	-0.842663	0.005	0.01	1	2
Nhsl2	0.0715739	-0.841929	0.018	0.03	1	2
Zdhhc1	0.124592	-0.841829	0.007	0.013	1	2
Ranbp6	0.0232756	-0.837336	0.023	0.04	1	2
Gramd3	1.93489e-07	-0.837266	0.257	0.356	0.00320224	2
Kyat3	0.195479	-0.833967	0.008	0.013	1	2
Gm28305	0.133317	-0.833792	0.008	0.015	1	2
Sgsm3	0.299132	-0.833417	0.011	0.017	1	2
Ypel2	0.209187	-0.831607	0.009	0.016	1	2
Abca5	0.294635	-0.831571	0.012	0.018	1	2
H2-Q4	1.86535e-31	-0.829581	0.434	0.681	3.08715e-27	2
H2bc8	0.00226385	-0.829171	0.028	0.056	1	2
Asb2	0.212401	-0.828197	0.026	0.036	1	2
Nphp3	0.286125	-0.824246	0.008	0.013	1	2
Rbbp8	1.94667e-07	-0.823144	0.211	0.317	0.00322174	2
Prkab2	0.00174699	-0.822338	0.039	0.07	1	2
Lpcat2	0.0372209	-0.821363	0.011	0.023	1	2
Psd2	0.292207	-0.820674	0.009	0.015	1	2
Tgfa	0.088209	-0.819798	0.004	0.01	1	2
Slc15a3	0.291766	-0.818895	0.017	0.023	1	2
Ano8	0.0601133	-0.815621	0.013	0.025	1	2
Slx4	0.0481715	-0.81532	0.029	0.046	1	2
Ybey	0.0751805	-0.815206	0.02	0.032	1	2
S1pr1	0.000728732	-0.814298	0.126	0.178	1	2
Rnase6	0.0612502	-0.814254	0.013	0.025	1	2
Slpi	0.0335295	-0.812911	0.007	0.017	1	2
Fancg	0.058518	-0.811568	0.008	0.017	1	2
Fancc	7.82281e-05	-0.810934	0.104	0.163	1	2
Map2k6	0.000140488	-0.810268	0.086	0.141	1	2
Sesn2	0.0080865	-0.80618	0.039	0.066	1	2
Zfyve28	0.29201	-0.805862	0.009	0.015	1	2
Zfp12	0.117158	-0.805778	0.012	0.021	1	2
Eid2b	0.0545853	-0.805278	0.011	0.022	1	2
H3c6	1.53128e-06	-0.80502	0.086	0.157	0.0253426	2
Pim3	8.67486e-06	-0.804538	0.101	0.169	0.143569	2
Camk2b	6.89157e-12	-0.804222	0.146	0.277	1.14055e-07	2
Abhd15	0.124708	-0.804005	0.007	0.013	1	2
Spatc1	0.0034682	-0.803827	0.03	0.057	1	2
Selenom	0.273551	-0.803314	0.007	0.011	1	2
Gm10053	0.00828135	-0.801964	0.007	0.02	1	2
Lonrf1	0.141455	-0.801752	0.008	0.016	1	2
Trmt5	0.49572	-0.800437	0.014	0.018	1	2
Nav2	0.0389173	-0.799729	0.038	0.057	1	2
Il4ra	3.30867e-06	-0.799375	0.133	0.213	0.0547585	2
Prkra	0.00904554	-0.796914	0.03	0.054	1	2
Tshz2	0.125056	-0.796828	0.007	0.013	1	2
Angpt2	0.520737	-0.796427	0.01	0.013	1	2
Il11ra1	0.0451878	-0.794048	0.014	0.027	1	2
Isca1	1.33285e-06	-0.793546	0.098	0.172	0.0220587	2
Garem1	0.11426	-0.791405	0.006	0.012	1	2
Palb2	0.393859	-0.790994	0.01	0.015	1	2
Tnfrsf21	0.108496	-0.790513	0.01	0.019	1	2
Ier3	0.108292	-0.788971	0.029	0.043	1	2
Hlf	0.396801	-0.788764	0.008	0.011	1	2
S100a8	0.0265636	-0.787261	0.026	0.045	1	2
Ankrd6	0.664362	-0.786884	0.011	0.013	1	2
Lpcat1	0.0536272	-0.786279	0.011	0.022	1	2
Cln6	0.111405	-0.785176	0.011	0.02	1	2
Zswim9	0.0520902	-0.783023	0.007	0.016	1	2
Cabyr	0.0762737	-0.782895	0.019	0.031	1	2
Nfkbid	1.9215e-09	-0.780052	0.193	0.311	3.18009e-05	2
Tmsb10	1.39424e-129	-0.774633	0.993	0.996	2.30747e-125	2
Inf2	0.0170412	-0.774536	0.034	0.056	1	2
Ift43	0.0599655	-0.769652	0.008	0.017	1	2
Tor4a	0.00313494	-0.76794	0.034	0.063	1	2
Kcnh6	0.082815	-0.767927	0.012	0.022	1	2
Rfx2	0.0919413	-0.765986	0.016	0.027	1	2
Chek1	0.160691	-0.765624	0.005	0.01	1	2
Dusp3	0.00718016	-0.765379	0.033	0.058	1	2
Bst1	0.528746	-0.765333	0.009	0.012	1	2
Dpm1	1.33757e-12	-0.763924	0.267	0.413	2.21367e-08	2
Tmem238	0.000400396	-0.763439	0.052	0.093	1	2
Gjb2	0.170579	-0.762994	0.015	0.023	1	2
Cbarp	0.0355749	-0.761094	0.025	0.043	1	2
Noct	0.182203	-0.759775	0.022	0.031	1	2
Pnpla3	0.0532224	-0.759253	0.004	0.011	1	2
Optn	0.00743011	-0.756021	0.026	0.049	1	2
Icmt	0.129644	-0.754314	0.018	0.028	1	2
Cd83	0.000880015	-0.753384	0.117	0.168	1	2
Zfp563	0.0872689	-0.753238	0.013	0.023	1	2
Xlr5a	0.0150489	-0.753049	0.02	0.038	1	2
Amz2	0.0136535	-0.751758	0.081	0.113	1	2
H2bc9	0.00891445	-0.747145	0.009	0.025	1	2
Ildr1	0.297116	-0.746835	0.012	0.018	1	2
Dcun1d4	0.060913	-0.746709	0.023	0.037	1	2
Atg14	0.0518391	-0.746703	0.049	0.069	1	2
Eno1	8.33833e-15	-0.745159	0.317	0.489	1.37999e-10	2
Dennd5a	0.00132662	-0.744744	0.134	0.186	1	2
Trmt10a	0.000611587	-0.740868	0.1	0.15	1	2
Spon1	0.294286	-0.740433	0.01	0.016	1	2
Ccdc184	0.0204293	-0.738131	0.009	0.022	1	2
Acsf3	0.121166	-0.738122	0.013	0.022	1	2
Zfp867	0.372872	-0.738076	0.018	0.023	1	2
Rasl11b	0.0322098	-0.737602	0.014	0.028	1	2
Adat2	0.0449262	-0.735029	0.023	0.039	1	2
Chaf1a	0.210718	-0.734966	0.009	0.016	1	2
Pram1	0.22425	-0.733536	0.013	0.02	1	2
Fignl1	0.674008	-0.733229	0.01	0.012	1	2
Arl6	0.535673	-0.731526	0.008	0.011	1	2
Plscr2	0.157209	-0.730664	0.01	0.018	1	2
Cfap43	0.0548899	-0.729162	0.019	0.032	1	2
Rasgef1a	0.0338151	-0.728642	0.023	0.04	1	2
Dxo	0.00889152	-0.72785	0.044	0.072	1	2
Rhebl1	0.295618	-0.726857	0.01	0.016	1	2
Acrbp	0.0674668	-0.724973	0.015	0.027	1	2
Creb5	0.691061	-0.724937	0.009	0.011	1	2
Poll	0.217901	-0.722133	0.011	0.018	1	2
Trpt1	0.197875	-0.721877	0.008	0.013	1	2
Trf	0.00720689	-0.720478	0.074	0.11	1	2
BC024978	0.123786	-0.719326	0.014	0.023	1	2
Tfrc	0.000893216	-0.718296	0.126	0.179	1	2
Irag1	0.534501	-0.716188	0.009	0.012	1	2
Kcna3	0.142038	-0.715682	0.008	0.016	1	2
Cryl1	0.210565	-0.714868	0.009	0.016	1	2
Sccpdh	0.0596706	-0.714519	0.023	0.037	1	2
Lacc1	0.285719	-0.714058	0.008	0.013	1	2
Pvrig	0.0176106	-0.713821	0.023	0.041	1	2
Ccp110	0.170154	-0.711633	0.015	0.023	1	2
Kctd7	0.520179	-0.711566	0.01	0.013	1	2
Pwwp2b	0.210105	-0.711552	0.009	0.016	1	2
Srebf1	0.00676724	-0.711535	0.053	0.084	1	2
Nrxn3	0.19532	-0.711404	0.008	0.013	1	2
Glb1l	0.103163	-0.709962	0.009	0.018	1	2
Gatc	0.223656	-0.709413	0.014	0.021	1	2
Marcksl1	0.0618947	-0.708176	0.025	0.04	1	2
Pde6a	0.114833	-0.707929	0.006	0.012	1	2
Antxr2	0.00472088	-0.707609	0.188	0.24	1	2
Stk35	0.0842354	-0.707389	0.024	0.038	1	2
Fbxo24	0.225436	-0.705978	0.013	0.02	1	2
Bend6	0.130841	-0.704902	0.019	0.029	1	2
Cpd	0.0255599	-0.704573	0.039	0.06	1	2
Zfp764	0.115179	-0.704438	0.006	0.012	1	2
Atp5o	0.00574176	-0.703754	0.016	0.036	1	2
Gadd45b	0.000345717	-0.703553	0.285	0.355	1	2
Swsap1	0.296051	-0.702639	0.012	0.018	1	2
Sdc4	0.000294072	-0.701706	0.079	0.129	1	2
Gzmk	0.204757	-0.700327	0.008	0.015	1	2
Snhg4	3.88524e-05	-0.699314	0.084	0.143	0.643007	2
Scg5	0.204914	-0.69857	0.008	0.015	1	2
Ntm	0.282808	-0.69852	0.008	0.012	1	2
Ctbs	0.00716003	-0.697299	0.031	0.056	1	2
Tjap1	0.00227912	-0.694272	0.054	0.089	1	2
Lbhd1	0.125522	-0.694101	0.007	0.013	1	2
Mtmr4	0.0471242	-0.693775	0.015	0.028	1	2
Dnah17	0.287958	-0.693105	0.008	0.013	1	2
Hivep1	1.37774e-06	-0.692615	0.251	0.341	0.0228016	2
Nat9	0.00173086	-0.692543	0.036	0.067	1	2
Zfp935	0.0429565	-0.691967	0.021	0.036	1	2
Bend4	0.0517655	-0.691189	0.048	0.068	1	2
Gm14410	0.161184	-0.690546	0.005	0.01	1	2
Fbxo46	0.0242124	-0.690382	0.039	0.06	1	2
Tmem63b	0.0331504	-0.690311	0.049	0.072	1	2
Thg1l	0.126384	-0.689929	0.015	0.025	1	2
Xlr4b	0.00132355	-0.688967	0.055	0.094	1	2
Lpar2	0.398079	-0.68896	0.008	0.012	1	2
Samd1	0.038072	-0.683617	0.033	0.051	1	2
Zkscan8	0.0928392	-0.683496	0.015	0.026	1	2
Ccrl2	3.89017e-05	-0.68336	0.132	0.201	0.643822	2
Lipo3	0.115409	-0.683241	0.006	0.012	1	2
Atat1	0.126718	-0.682035	0.015	0.025	1	2
Arhgap23	0.400055	-0.681923	0.008	0.011	1	2
Gm14295	0.102992	-0.681047	0.009	0.018	1	2
Hs6st1	0.140157	-0.680689	0.029	0.041	1	2
9930022D16Rik	0.00486726	-0.680615	0.055	0.088	1	2
Notch4	0.289389	-0.68034	0.008	0.013	1	2
Cep72	0.134133	-0.680022	0.008	0.015	1	2
Plekha4	0.0650633	-0.67963	0.032	0.048	1	2
Cxcr5	0.23023	-0.67956	0.017	0.025	1	2
Kdm6b	6.78357e-08	-0.677694	0.304	0.415	0.00112268	2
Cars	0.0514728	-0.675872	0.042	0.062	1	2
Piezo1	0.000303143	-0.675681	0.121	0.18	1	2
Ttpal	0.000969143	-0.674934	0.102	0.151	1	2
Irf5	0.0060124	-0.67476	0.038	0.065	1	2
Slc39a11	0.0874483	-0.672795	0.04	0.057	1	2
Pdss1	0.533422	-0.671988	0.057	0.064	1	2
Btd	0.0271804	-0.671611	0.027	0.046	1	2
Ckb	0.0347662	-0.670714	0.023	0.04	1	2
H3c7	0.00334432	-0.670378	0.029	0.056	1	2
Acad10	0.0805601	-0.669286	0.023	0.036	1	2
E2f6	0.224381	-0.6686	0.023	0.032	1	2
Fam83d	0.39266	-0.668229	0.007	0.01	1	2
Dnajc6	0.396808	-0.667957	0.011	0.016	1	2
Slc16a7	0.518271	-0.66503	0.011	0.015	1	2
Homer1	0.0349277	-0.66443	0.133	0.164	1	2
Vmac	0.0186065	-0.664012	0.012	0.027	1	2
Gpr132	3.72942e-10	-0.663482	0.342	0.48	6.17218e-06	2
Ankrd37	0.288775	-0.662649	0.008	0.013	1	2
Klf10	1.20647e-06	-0.662646	0.197	0.292	0.019967	2
Spata6l	0.131353	-0.662231	0.018	0.028	1	2
Foxd2	0.264813	-0.660567	0.006	0.01	1	2
Ctbp2	0.0836431	-0.658943	0.027	0.041	1	2
Pex10	0.120953	-0.657268	0.013	0.022	1	2
Ddx60	0.0235266	-0.656779	0.052	0.076	1	2
Mthfr	0.0212776	-0.656031	0.027	0.047	1	2
Cerkl	0.00835523	-0.655591	0.038	0.064	1	2
Llgl2	0.0200783	-0.655451	0.039	0.063	1	2
Klc4	0.0443489	-0.654446	0.022	0.037	1	2
Dennd6b	0.535361	-0.654443	0.008	0.011	1	2
Rora	1.697e-05	-0.653786	0.237	0.32	0.280853	2
Slc25a43	0.0646914	-0.653662	0.014	0.026	1	2
Dhrs3	0.000196013	-0.652752	0.145	0.208	1	2
Gzmc	0.00298974	-0.651203	0.011	0.03	1	2
Serpinb1b	0.395262	-0.650218	0.01	0.015	1	2
Nap1l3	0.297287	-0.649888	0.011	0.017	1	2
Bckdk	0.00611335	-0.648403	0.037	0.064	1	2
Cox6b2	0.0883155	-0.646109	0.004	0.01	1	2
Ckm	0.296148	-0.645701	0.016	0.022	1	2
Ogg1	0.0825789	-0.645145	0.026	0.04	1	2
Cyp4v3	0.126341	-0.644991	0.044	0.059	1	2
Dbf4	0.00320089	-0.644734	0.128	0.173	1	2
Mast4	0.000286151	-0.644262	0.072	0.122	1	2
Aste1	0.0994364	-0.644154	0.047	0.064	1	2
Ehhadh	0.176796	-0.643838	0.017	0.026	1	2
Oxsm	0.0651523	-0.643231	0.025	0.04	1	2
Vezt	0.00592003	-0.641595	0.045	0.075	1	2
Gabarapl1	0.00455024	-0.641555	0.053	0.085	1	2
Hs1bp3	0.295428	-0.641354	0.01	0.016	1	2
Cxadr	0.0368922	-0.638933	0.028	0.046	1	2
Ddx51	0.0976107	-0.637966	0.017	0.028	1	2
Dbr1	0.00350536	-0.637314	0.047	0.079	1	2
Myo1d	0.136954	-0.636647	0.023	0.034	1	2
Zfp937	0.0573182	-0.636326	0.02	0.034	1	2
Rasgef1b	0.000139991	-0.635691	0.097	0.154	1	2
Pabpn1	3.28136e-06	-0.63259	0.137	0.218	0.0543065	2
Xkr8	0.264131	-0.631917	0.006	0.01	1	2
Agbl5	0.043123	-0.631004	0.008	0.019	1	2
Nt5dc3	0.131512	-0.630345	0.017	0.027	1	2
Dst	0.0575788	-0.629934	0.012	0.023	1	2
Sumf2	0.093397	-0.627841	0.047	0.064	1	2
Heatr5b	0.0173814	-0.627394	0.062	0.091	1	2
Rwdd2a	0.0178251	-0.626188	0.006	0.017	1	2
Zfp658	0.399949	-0.625825	0.012	0.017	1	2
Zfp770	0.140644	-0.625376	0.024	0.036	1	2
Nfkbiz	1.08006e-11	-0.625238	0.491	0.625	1.78751e-07	2
Gfpt2	0.264586	-0.624991	0.006	0.01	1	2
Gm20604	0.299138	-0.623495	0.013	0.019	1	2
Smpd4	0.0647892	-0.623272	0.028	0.044	1	2
Scart2	0.645324	-0.622992	0.013	0.016	1	2
Gm5127	0.0224008	-0.622896	0.014	0.029	1	2
Gpr141	0.0876783	-0.621676	0.004	0.01	1	2
Fosl2	6.19397e-05	-0.621304	0.266	0.343	1	2
Mipep	0.111232	-0.620006	0.037	0.051	1	2
Gm2237	0.176313	-0.619209	0.006	0.011	1	2
Tmem38a	0.400657	-0.618842	0.008	0.012	1	2
Adal	0.0124892	-0.61876	0.022	0.041	1	2
Twnk	0.101018	-0.618678	0.018	0.029	1	2
Chtf8	0.384397	-0.616874	0.015	0.02	1	2
Fan1	0.00639237	-0.615682	0.03	0.055	1	2
Bbs2	0.230005	-0.615245	0.02	0.028	1	2
Uspl1	0.00266223	-0.614934	0.079	0.12	1	2
Akap17b	0.125308	-0.614382	0.014	0.023	1	2
Tmem143	0.216423	-0.614141	0.01	0.017	1	2
Dffa	0.0310745	-0.613657	0.031	0.05	1	2
Fam151b	0.226487	-0.613201	0.013	0.02	1	2
Relb	4.38369e-08	-0.612238	0.268	0.386	0.000725501	2
Ccdc148	0.027095	-0.612186	0.038	0.059	1	2
Ica1	0.985161	-0.611523	0.029	0.029	1	2
Ell2	8.35383e-05	-0.611221	0.206	0.281	1	2
Tssk6	0.36504	-0.610349	0.021	0.027	1	2
Atl1	0.17582	-0.609879	0.006	0.011	1	2
Efcab11	0.281751	-0.6092	0.008	0.012	1	2
Trim65	0.00606631	-0.608998	0.055	0.086	1	2
Col23a1	0.85422	-0.608258	0.01	0.011	1	2
Shb	0.107383	-0.607946	0.025	0.038	1	2
Gm7694	0.539872	-0.606561	0.008	0.01	1	2
Wnt5b	0.396949	-0.605953	0.007	0.01	1	2
Ttc8	0.297103	-0.60592	0.011	0.017	1	2
Rftn2	0.763504	-0.605581	0.014	0.016	1	2
Xlr4c	0.0708805	-0.605518	0.009	0.019	1	2
Farp2	0.0845121	-0.603672	0.039	0.055	1	2
Zfp369	0.0495477	-0.602652	0.054	0.075	1	2
Rab43	0.00386922	-0.6019	0.024	0.049	1	2
Unc5cl	0.177819	-0.601789	0.021	0.03	1	2
Zfp395	0.0110502	-0.60132	0.058	0.088	1	2
Pkd2l2	0.400053	-0.599395	0.009	0.013	1	2
Zbtb34	0.910425	-0.599027	0.02	0.019	1	2
Sphk2	0.0329682	-0.598918	0.037	0.057	1	2
ENSMUSG00000095742	0.264813	-0.598879	0.006	0.01	1	2
Catspere2	0.217176	-0.598818	0.01	0.017	1	2
Cracdl	0.032363	-0.598097	0.021	0.037	1	2
Nfkbia	1.93099e-14	-0.598021	0.694	0.793	3.19578e-10	2
Rnf141	0.0258163	-0.597769	0.043	0.066	1	2
Ifrd1	3.27283e-14	-0.597709	0.644	0.766	5.41653e-10	2
Tarbp2	0.0668152	-0.596227	0.036	0.053	1	2
Cxcl2	0.384204	-0.595671	0.015	0.02	1	2
Sap18	9.48634e-12	-0.595463	0.35	0.512	1.56999e-07	2
Zbtb18	0.0620693	-0.594369	0.023	0.038	1	2
Galnt4	0.0934207	-0.594365	0.015	0.026	1	2
Idh1	0.131617	-0.594004	0.02	0.03	1	2
Ppargc1a	0.0658051	-0.593311	0.034	0.05	1	2
Proser1	7.8661e-05	-0.593186	0.07	0.123	1	2
Nphs1	0.0707875	-0.593147	0.009	0.019	1	2
Yod1	0.108348	-0.591532	0.024	0.037	1	2
Galnt3	0.0156007	-0.58956	0.039	0.064	1	2
Acsl3	0.0410694	-0.589094	0.036	0.055	1	2
Bbs4	0.106103	-0.588784	0.024	0.037	1	2
Zpbp2	0.398823	-0.587209	0.009	0.013	1	2
Ankmy1	0.397822	-0.58713	0.008	0.012	1	2
Tspan31	0.136375	-0.586722	0.022	0.032	1	2
Niban1	3.14801e-05	-0.586011	0.206	0.289	0.520996	2
Zscan2	0.0263725	-0.585893	0.036	0.057	1	2
Dpp7	0.283657	-0.585343	0.008	0.012	1	2
Cmss1	4.59714e-56	-0.585019	0.961	0.993	7.60826e-52	2
Cfap298	0.0330651	-0.584795	0.04	0.062	1	2
Atf3	3.67078e-05	-0.583753	0.249	0.33	0.607514	2
Fnbp1l	0.689363	-0.583068	0.009	0.011	1	2
Ltv1	0.000343344	-0.582193	0.131	0.19	1	2
Fbxo27	0.297566	-0.581948	0.016	0.022	1	2
Abcb1b	0.23717	-0.580281	0.181	0.2	1	2
Clybl	0.102045	-0.577748	0.067	0.086	1	2
Selenbp1	0.787196	-0.577622	0.013	0.015	1	2
Nipal1	0.163478	-0.577332	0.012	0.02	1	2
Sdhaf1	0.00325486	-0.57577	0.13	0.178	1	2
Gatb	0.0186193	-0.57567	0.035	0.057	1	2
Tmem186	0.0232972	-0.574094	0.03	0.05	1	2
Abhd14a	0.207047	-0.574022	0.034	0.045	1	2
Spag9	2.5314e-08	-0.573631	0.51	0.626	0.000418946	2
Simc1	0.0134729	-0.572375	0.125	0.163	1	2
Cks2	2.28392e-05	-0.572211	0.206	0.286	0.377988	2
Slc35e4	0.0908635	-0.570631	0.014	0.025	1	2
3110040N11Rik	0.00174969	-0.570345	0.077	0.12	1	2
Zc3h12a	6.70058e-09	-0.569962	0.26	0.391	0.000110895	2
Alg11	0.0861376	-0.569659	0.037	0.053	1	2
Nmnat2	7.27356e-05	-0.569304	0.098	0.16	1	2
Tgif1	3.59852e-05	-0.568905	0.177	0.257	0.595555	2
Pusl1	0.0760257	-0.568848	0.019	0.031	1	2
Sh3bp5	0.0827534	-0.568242	0.046	0.064	1	2
Tomt	0.0450585	-0.568158	0.022	0.037	1	2
Btk	0.161843	-0.568021	0.005	0.01	1	2
Lrp1b	0.0692648	-0.56795	0.028	0.044	1	2
Serinc4	0.149995	-0.567949	0.009	0.017	1	2
Aldh7a1	0.379012	-0.567325	0.016	0.021	1	2
Fam177a	0.178658	-0.566907	0.02	0.029	1	2
Msl3l2	0.176955	-0.565358	0.016	0.025	1	2
Cebpd	0.0999936	-0.56535	0.018	0.029	1	2
Abcc1	0.00129475	-0.564966	0.091	0.138	1	2
Mfsd6	0.000481801	-0.564869	0.196	0.262	1	2
Rpap1	0.0534066	-0.564157	0.031	0.048	1	2
Zfp275	0.0407927	-0.564029	0.034	0.053	1	2
Frat1	0.0208266	-0.563974	0.041	0.065	1	2
Ankrd26	0.0628361	-0.563909	0.023	0.037	1	2
Slc16a2	0.498542	-0.563587	0.014	0.018	1	2
Chchd6	0.597676	-0.56291	0.016	0.019	1	2
Dolk	0.165166	-0.561912	0.012	0.02	1	2
Xk	0.298024	-0.561642	0.011	0.017	1	2
Gopc	0.00229451	-0.559743	0.111	0.159	1	2
Acadsb	0.0702893	-0.559677	0.04	0.058	1	2
Jmjd8	0.113798	-0.55914	0.011	0.02	1	2
Rnaseh2b	0.0266488	-0.559132	0.046	0.069	1	2
Ado	0.0359128	-0.557621	0.047	0.069	1	2
Tnf	0.00169007	-0.556824	0.096	0.142	1	2
2410002F23Rik	0.0332181	-0.556368	0.07	0.096	1	2
Ppp2r2d	4.22755e-06	-0.55563	0.138	0.221	0.0699659	2
Tgfbr3	0.231632	-0.55541	0.017	0.025	1	2
mt-Nd6	0.000874574	-0.555311	0.064	0.106	1	2
Mxi1	0.00633091	-0.555287	0.07	0.105	1	2
Tm9sf1	0.265599	-0.555132	0.029	0.038	1	2
Acp2	0.392195	-0.555092	0.013	0.018	1	2
Zfp524	0.021567	-0.554413	0.039	0.063	1	2
Slc25a44	0.038561	-0.55423	0.03	0.048	1	2
Sec22a	0.000847028	-0.553731	0.083	0.13	1	2
Cdkn1c	0.131194	-0.553551	0.016	0.026	1	2
4930523C07Rik	5.25733e-11	-0.552934	0.489	0.62	8.70088e-07	2
Snx32	0.139967	-0.552516	0.023	0.034	1	2
Dtwd1	0.135904	-0.552115	0.019	0.029	1	2
Bri3bp	0.109827	-0.551964	0.027	0.04	1	2
Slc2a8	0.101824	-0.551741	0.018	0.029	1	2
Gm14326	0.0896116	-0.551434	0.032	0.047	1	2
Zcchc24	0.131348	-0.551329	0.017	0.027	1	2
Zfp704	0.464783	-0.54951	0.02	0.025	1	2
Zhx2	0.000276123	-0.549212	0.281	0.357	1	2
Tpk1	0.00312658	-0.548349	0.198	0.249	1	2
Tiam1	0.356482	-0.548128	0.022	0.028	1	2
Igsf5	0.393801	-0.548045	0.007	0.01	1	2
Nek4	0.402272	-0.547788	0.009	0.013	1	2
Gna13	2.78626e-05	-0.547648	0.406	0.492	0.461126	2
Dock7	0.303236	-0.54737	0.014	0.02	1	2
Rubcnl	0.225144	-0.546776	0.014	0.021	1	2
Tnrc18	3.78031e-05	-0.546738	0.145	0.218	0.625641	2
H3c4	0.296572	-0.546605	0.01	0.016	1	2
H2-Q6	3.40757e-20	-0.546427	0.673	0.818	5.63953e-16	2
Ccdc73	0.0335847	-0.546213	0.039	0.06	1	2
Nt5e	0.219665	-0.544803	0.056	0.069	1	2
BC049715	0.0169793	-0.544531	0.022	0.04	1	2
Qsox2	0.165909	-0.543201	0.013	0.021	1	2
Mfsd11	0.0688808	-0.542031	0.028	0.044	1	2
Plcb3	0.504426	-0.541949	0.013	0.017	1	2
Oas1c	0.107706	-0.541049	0.037	0.051	1	2
Nsun4	0.0337341	-0.540723	0.045	0.067	1	2
Hyal1	0.22858	-0.539399	0.017	0.025	1	2
Zfp39	0.0688906	-0.539354	0.016	0.028	1	2
Dusp6	0.0743322	-0.538621	0.08	0.103	1	2
Mmgt1	0.0490496	-0.53824	0.025	0.041	1	2
Rbm12b1	0.226912	-0.537565	0.014	0.021	1	2
Msrb2	0.0700327	-0.537542	0.032	0.048	1	2
Prox2	0.523533	-0.537513	0.01	0.013	1	2
Bsdc1	0.00365038	-0.535394	0.127	0.171	1	2
Qrsl1	0.088109	-0.534844	0.042	0.059	1	2
Myef2	0.00011018	-0.53344	0.097	0.157	1	2
Tmem181a	2.23601e-05	-0.533221	0.132	0.205	0.370059	2
Sgk1	0.000540686	-0.53305	0.208	0.277	1	2
Zfp397	0.0408971	-0.532854	0.081	0.107	1	2
Kctd4	0.231249	-0.532276	0.017	0.025	1	2
Gfer	0.0506244	-0.532027	0.057	0.079	1	2
Ift57	0.0209745	-0.530075	0.025	0.045	1	2
Enkur	0.140116	-0.529009	0.023	0.035	1	2
Uap1	0.0092093	-0.52735	0.081	0.116	1	2
Rpl13a	3.91173e-17	-0.527331	0.559	0.742	6.47392e-13	2
Cnga1	0.827923	-0.527002	0.011	0.012	1	2
Zfp874b	0.0878909	-0.52597	0.036	0.051	1	2
Rap2a	8.20223e-05	-0.52544	0.11	0.174	1	2
Rab29	0.0846969	-0.523652	0.041	0.058	1	2
Pcgf3	0.0265033	-0.523423	0.055	0.081	1	2
Slc12a3	0.175524	-0.523073	0.016	0.025	1	2
0610010K14Rik	0.000234265	-0.522506	0.096	0.153	1	2
Rbm48	0.000393307	-0.522335	0.074	0.123	1	2
Gvin2	1.18639e-06	-0.521861	0.219	0.319	0.0196348	2
E130311K13Rik	0.224112	-0.521769	0.012	0.019	1	2
Kcnk10	0.00663286	-0.521702	0.078	0.114	1	2
Mageh1	0.135305	-0.521142	0.008	0.015	1	2
Tmem67	0.765845	-0.521078	0.014	0.016	1	2
Mypop	0.0655473	-0.520501	0.026	0.041	1	2
Abraxas1	0.339992	-0.518734	0.038	0.046	1	2
Sirt5	0.053451	-0.518726	0.031	0.048	1	2
Ankrd24	0.298187	-0.518312	0.017	0.023	1	2
Tyw5	0.0104737	-0.5177	0.06	0.091	1	2
Ccdc66	0.0295724	-0.516444	0.044	0.067	1	2
Cyp2r1	0.400903	-0.51538	0.01	0.015	1	2
Tspan4	0.596938	-0.515297	0.016	0.019	1	2
1810024B03Rik	0.00165268	-0.515277	0.04	0.074	1	2
Zfp59	0.675293	-0.513926	0.01	0.012	1	2
Itpkc	0.182623	-0.51273	0.023	0.034	1	2
Pex1	0.22171	-0.512335	0.026	0.036	1	2
Rec114	0.106308	-0.512233	0.02	0.031	1	2
Il17c	0.295172	-0.511786	0.009	0.015	1	2
Dynlt1f	0.00594905	-0.510772	0.081	0.119	1	2
4833439L19Rik	0.00946031	-0.510293	0.08	0.115	1	2
Flnb	0.034434	-0.509924	0.065	0.091	1	2
Lyrm9	0.0137815	-0.509916	0.058	0.087	1	2
Bnip3	0.0316898	-0.509796	0.031	0.05	1	2
Exosc2	0.0359381	-0.509714	0.043	0.065	1	2
Csf2ra	0.276416	-0.509224	0.025	0.034	1	2
Cyp4f16	0.0071828	-0.509183	0.042	0.07	1	2
Pxmp2	0.383325	-0.507165	0.016	0.021	1	2
Ttc28	0.000139215	-0.506807	0.161	0.228	1	2
Aqp3	0.305688	-0.506607	0.015	0.021	1	2
Rnf40	0.0175166	-0.506547	0.052	0.078	1	2
H2-Q5	1.63665e-05	-0.506156	0.164	0.247	0.270866	2
Cntnap2	0.290003	-0.505483	0.008	0.013	1	2
Tom1	0.0120897	-0.503102	0.064	0.095	1	2
Pdxp	0.544982	-0.502911	0.022	0.026	1	2
Wdpcp	0.305409	-0.500237	0.034	0.043	1	2
Gas2	0.0136445	-0.499903	0.017	0.035	1	2
Srcap	0.0108283	-0.49919	0.07	0.103	1	2
Kdm1b	0.0227089	-0.499123	0.028	0.048	1	2
Hoxa3	0.396902	-0.498803	0.01	0.015	1	2
Parp3	0.00344573	-0.498411	0.043	0.075	1	2
Atp7a	0.0142886	-0.498407	0.086	0.119	1	2
Atg9a	0.0305486	-0.498014	0.028	0.047	1	2
Slfn9	0.114565	-0.496829	0.038	0.053	1	2
Cenpl	0.063175	-0.496451	0.054	0.074	1	2
Natd1	0.0649643	-0.495969	0.024	0.039	1	2
Coq7	0.181978	-0.49481	0.029	0.04	1	2
G0s2	0.225962	-0.494056	0.043	0.055	1	2
Slc25a1	0.0558266	-0.493941	0.042	0.062	1	2
Gm1043	0.187747	-0.493777	0.046	0.059	1	2
Il7r	0.000102672	-0.493316	0.243	0.321	1	2
Zfp239	0.0393747	-0.493257	0.005	0.013	1	2
Tsr1	0.0458339	-0.492784	0.039	0.059	1	2
Pcgf5	0.00025149	-0.492412	0.183	0.253	1	2
Taf8	0.00508369	-0.492173	0.049	0.081	1	2
Zfp991	0.108242	-0.491942	0.022	0.034	1	2
Ipo13	0.299884	-0.491397	0.017	0.023	1	2
Plk3	0.0180628	-0.490789	0.065	0.094	1	2
Sema4f	0.846464	-0.490142	0.01	0.011	1	2
Kdm2b	4.75807e-07	-0.489941	0.43	0.532	0.0078746	2
Usp54	0.128127	-0.489186	0.016	0.026	1	2
Nadsyn1	0.0874609	-0.488901	0.025	0.039	1	2
Coro1b	0.00543686	-0.488611	0.041	0.07	1	2
Sft2d3	0.0155096	-0.488341	0.086	0.119	1	2
Cfap20	0.0122218	-0.487772	0.114	0.154	1	2
Tmed1	0.136749	-0.487622	0.019	0.029	1	2
Ulbp1	0.0657162	-0.486927	0.053	0.073	1	2
Tmem116	0.394087	-0.486754	0.007	0.01	1	2
Cdip1	0.00918185	-0.485898	0.079	0.114	1	2
Tsga10	0.00691475	-0.485851	0.056	0.088	1	2
Alg6	0.0596038	-0.485585	0.019	0.032	1	2
Usp36	0.000947535	-0.48553	0.11	0.162	1	2
Mpp7	0.0477826	-0.485332	0.252	0.286	1	2
Zfp788	0.0280671	-0.485193	0.044	0.067	1	2
Fxn	0.00597708	-0.484941	0.076	0.113	1	2
Otud1	0.0560725	-0.484515	0.043	0.063	1	2
Pcgf1	0.224866	-0.483531	0.025	0.035	1	2
Pmm1	0.0179615	-0.483441	0.031	0.053	1	2
Fitm2	0.532579	-0.483287	0.009	0.012	1	2
Pofut2	0.00355116	-0.483099	0.083	0.124	1	2
Bhlhe41	0.69276	-0.48181	0.009	0.011	1	2
Zbtb10	0.000115075	-0.481367	0.204	0.281	1	2
Dusp23	0.171688	-0.481254	0.033	0.045	1	2
Slc36a4	0.493289	-0.481176	0.015	0.019	1	2
Cdc25a	0.46335	-0.481087	0.019	0.023	1	2
Aurka	0.216875	-0.47984	0.01	0.017	1	2
Filip1	0.414113	-0.479543	0.039	0.046	1	2
Obi1	0.067441	-0.479474	0.062	0.084	1	2
Cdc25b	0.163855	-0.478763	0.053	0.067	1	2
Dthd1	0.358455	-0.478084	0.023	0.029	1	2
Def8	0.284705	-0.478079	0.008	0.013	1	2
Cyren	0.0127426	-0.477977	0.043	0.069	1	2
Fbxl15	0.0161197	-0.477092	0.04	0.065	1	2
Jak3	0.00616301	-0.476647	0.06	0.094	1	2
Agap1	0.707835	-0.476321	0.008	0.01	1	2
Klhl15	0.0144677	-0.476246	0.062	0.092	1	2
Tmx4	0.0300692	-0.476004	0.213	0.255	1	2
Yrdc	0.00053345	-0.475784	0.148	0.209	1	2
Lrsam1	0.70363	-0.475573	0.013	0.011	1	2
Brca1	0.171856	-0.475239	0.015	0.023	1	2
Phtf1	0.000314078	-0.473782	0.078	0.13	1	2
Garnl3	0.219903	-0.473226	0.01	0.017	1	2
Podnl1	0.464226	-0.473066	0.03	0.036	1	2
Slc52a3	0.954651	-0.472419	0.013	0.013	1	2
Ube2d1	0.000532048	-0.471174	0.158	0.223	1	2
Ccdc9	0.0244046	-0.470885	0.101	0.132	1	2
Kyat1	0.533761	-0.4703	0.009	0.012	1	2
Rnf217	0.300968	-0.469965	0.017	0.023	1	2
Sqor	0.212876	-0.469539	0.009	0.016	1	2
Ccdc77	0.0242425	-0.468763	0.052	0.077	1	2
Rab27b	0.00120913	-0.468587	0.08	0.125	1	2
Zfp617	0.0447558	-0.468441	0.043	0.064	1	2
Fpgs	0.560371	-0.467506	0.02	0.023	1	2
Aspm	0.073909	-0.466709	0.006	0.013	1	2
Ppil6	0.115184	-0.466523	0.011	0.02	1	2
Arhgef5	0.0718431	-0.466321	0.041	0.059	1	2
St6galnac5	0.175732	-0.466085	0.015	0.023	1	2
Alg2	0.460254	-0.465909	0.031	0.037	1	2
Slc36a3	0.298549	-0.465811	0.02	0.027	1	2
Oat	0.0109303	-0.465071	0.07	0.102	1	2
Neto2	0.141803	-0.464656	0.02	0.03	1	2
H3c13	0.055276	-0.464011	0.037	0.055	1	2
Taf1d	3.78876e-07	-0.463286	0.34	0.449	0.0062704	2
Dennd11	0.0523504	-0.463184	0.018	0.031	1	2
Xlr4a	0.0404907	-0.463049	0.032	0.05	1	2
Atp10d	0.0798271	-0.462319	0.165	0.196	1	2
Pycrl	0.027575	-0.462013	0.042	0.065	1	2
Mlst8	0.0159468	-0.461995	0.01	0.025	1	2
Cop1	0.000737886	-0.461691	0.227	0.292	1	2
Bap1	0.122458	-0.461199	0.051	0.067	1	2
Tnfsf9	0.505396	-0.460907	0.014	0.018	1	2
Tnfaip3	3.04534e-09	-0.460806	0.666	0.772	5.04003e-05	2
Ccsap	0.18163	-0.460785	0.028	0.039	1	2
Nphp4	0.690381	-0.460097	0.009	0.011	1	2
Marchf8	0.142495	-0.459879	0.086	0.105	1	2
Casp9	0.16166	-0.459609	0.041	0.055	1	2
Lmbr1	0.938023	-0.459473	0.02	0.02	1	2
H4c3	4.16253e-05	-0.458971	0.136	0.21	0.688898	2
Cdh23	0.0322239	-0.458288	0.029	0.048	1	2
Fbh1	0.159884	-0.457676	0.042	0.056	1	2
Itgb3	0.0239072	-0.457218	0.065	0.093	1	2
Cbwd1	0.000584407	-0.457062	0.148	0.208	1	2
3300002I08Rik	0.0733724	-0.456867	0.041	0.059	1	2
Cbfa2t3	0.114112	-0.45631	0.106	0.13	1	2
B3gnt2	0.0089161	-0.455042	0.055	0.085	1	2
Tm2d2	0.00111158	-0.454933	0.121	0.177	1	2
Gdpgp1	0.0604914	-0.45417	0.022	0.036	1	2
Ube2cbp	0.551708	-0.453968	0.022	0.026	1	2
Nrg2	0.353393	-0.453957	0.023	0.03	1	2
Ccnb1ip1	0.0227447	-0.453712	0.015	0.03	1	2
Tshz1	0.0163076	-0.453516	0.128	0.167	1	2
Ankrd46	0.068976	-0.453048	0.031	0.047	1	2
Gm15446	0.506878	-0.452378	0.013	0.017	1	2
Pole3	0.0109855	-0.451759	0.086	0.123	1	2
Nek3	0.227381	-0.451492	0.025	0.035	1	2
Ehbp1	0.126498	-0.451408	0.044	0.059	1	2
Fhip1b	0.513404	-0.451134	0.033	0.038	1	2
Gpr34	0.111702	-0.450695	0.023	0.036	1	2
Cdt1	0.000791958	-0.450618	0.101	0.152	1	2
Csrnp1	0.00270435	-0.450286	0.116	0.162	1	2
Zfp689	0.402795	-0.450262	0.01	0.015	1	2
Auts2	0.177344	-0.450128	0.018	0.027	1	2
Klf16	0.0155764	-0.449802	0.024	0.045	1	2
Cenpw	0.150304	-0.449671	0.048	0.063	1	2
Sema6a	0.616094	-0.449575	0.049	0.054	1	2
Blzf1	0.0559083	-0.44957	0.036	0.054	1	2
Trim13	0.110048	-0.449441	0.04	0.056	1	2
Cables1	0.000440262	-0.448485	0.075	0.124	1	2
Rps28	1.01022e-41	-0.448411	0.977	0.993	1.67191e-37	2
Rdh12	0.111097	-0.448356	0.01	0.019	1	2
Ccl25	0.00546796	-0.44766	0.08	0.117	1	2
Grhpr	0.20546	-0.445912	0.036	0.047	1	2
Gorab	0.0706533	-0.445709	0.035	0.051	1	2
Slc2a6	0.00928138	-0.445646	0.038	0.064	1	2
Ip6k2	0.00632819	-0.445472	0.09	0.13	1	2
Tnfrsf4	0.394944	-0.445382	0.007	0.01	1	2
Tmem141	0.466276	-0.445163	0.029	0.035	1	2
6430550D23Rik	0.0411025	-0.444833	0.018	0.032	1	2
Cep76	0.17846	-0.444497	0.017	0.026	1	2
Nme7	0.105856	-0.444321	0.068	0.087	1	2
H4c4	0.000253496	-0.444305	0.195	0.266	1	2
Miga2	0.209799	-0.443964	0.009	0.016	1	2
Zfp72	0.264131	-0.443635	0.006	0.01	1	2
Ptk2	0.690381	-0.442358	0.009	0.011	1	2
Zfp280b	0.180777	-0.441947	0.026	0.037	1	2
Stard9	0.196435	-0.441858	0.008	0.013	1	2
Smox	0.000482983	-0.441705	0.086	0.135	1	2
Mbd4	0.464068	-0.44151	0.032	0.038	1	2
Neurl3	9.9606e-09	-0.441508	0.575	0.707	0.000164848	2
Gm21988	0.159998	-0.44056	0.011	0.019	1	2
Kctd5	0.0150809	-0.440405	0.051	0.078	1	2
Kifap3	0.138303	-0.439353	0.023	0.034	1	2
Sh3rf1	0.151416	-0.43924	0.075	0.093	1	2
Ms4a15	0.141568	-0.439072	0.022	0.032	1	2
Rpl38	3.89239e-54	-0.438382	0.985	0.992	6.44191e-50	2
Ifit2	0.699684	-0.437958	0.034	0.037	1	2
Zscan18	0.534649	-0.437378	0.009	0.012	1	2
Traf1	8.05859e-06	-0.436752	0.539	0.617	0.13337	2
Gstm4	0.140288	-0.436704	0.018	0.028	1	2
Jchain	0.286852	-0.436194	0.008	0.012	1	2
Socs2	0.0582454	-0.43602	0.049	0.069	1	2
Rps21	1.35309e-61	-0.435999	0.991	0.996	2.23937e-57	2
Arl2	0.0184294	-0.435945	0.055	0.083	1	2
Vars2	0.222375	-0.435767	0.013	0.02	1	2
9430015G10Rik	0.0620802	-0.43479	0.023	0.037	1	2
Slc25a36	0.0013089	-0.434646	0.245	0.313	1	2
Selp	0.312601	-0.433956	0.032	0.04	1	2
Marchf3	0.010121	-0.433566	0.208	0.258	1	2
H2-Ab1	0.0531264	-0.433525	0.066	0.089	1	2
Mex3b	0.475603	-0.433257	0.018	0.022	1	2
Tepsin	0.45316	-0.432857	0.022	0.027	1	2
Acad9	0.0325226	-0.432799	0.069	0.095	1	2
Coq10b	6.99417e-08	-0.432277	0.506	0.616	0.00115753	2
Gdf11	0.174973	-0.432258	0.015	0.023	1	2
Erf	0.0411223	-0.432216	0.03	0.048	1	2
Wdr53	0.0621587	-0.431889	0.062	0.084	1	2
Rtp4	0.172666	-0.431642	0.055	0.069	1	2
Zfp36	3.63661e-05	-0.431528	0.533	0.603	0.601859	2
Qser1	0.334013	-0.431478	0.039	0.048	1	2
Mettl27	0.234109	-0.430639	0.018	0.026	1	2
Ets2	0.111123	-0.430288	0.043	0.059	1	2
Cwf19l1	0.233327	-0.429985	0.025	0.035	1	2
Utp20	0.097687	-0.429716	0.055	0.073	1	2
Arhgef4	0.464204	-0.42962	0.02	0.025	1	2
Gm14305	0.143576	-0.428969	0.024	0.036	1	2
Dtx1	0.00896036	-0.42861	0.041	0.068	1	2
Ddx19b	0.00140737	-0.428558	0.085	0.131	1	2
Rptor	0.0358104	-0.428541	0.354	0.399	1	2
Oxsr1	0.00792642	-0.428338	0.053	0.084	1	2
Ccng2	0.0195875	-0.428271	0.111	0.147	1	2
Gpam	0.0517946	-0.428085	0.016	0.029	1	2
Dram2	0.00242501	-0.427996	0.077	0.12	1	2
Mpped2	0.203504	-0.427833	0.008	0.015	1	2
Tagap1	0.0779792	-0.427781	0.01	0.02	1	2
Polr3a	0.046342	-0.427558	0.044	0.065	1	2
Klhl8	0.247805	-0.427338	0.049	0.06	1	2
Zfp952	0.0238017	-0.427129	0.049	0.074	1	2
Rfng	0.104709	-0.426822	0.019	0.03	1	2
Efnb1	0.353126	-0.426041	0.025	0.032	1	2
H2bc14	0.398697	-0.425706	0.008	0.011	1	2
Pip5k1b	4.7299e-05	-0.425409	0.136	0.209	0.782799	2
App	0.164635	-0.425375	0.04	0.054	1	2
Acss1	0.117152	-0.42493	0.078	0.098	1	2
Nfic	0.00161677	-0.424382	0.112	0.162	1	2
Rel	7.28785e-05	-0.424152	0.457	0.544	1	2
Kcnj13	0.545832	-0.423878	0.008	0.01	1	2
Arntl	0.00141425	-0.423381	0.121	0.173	1	2
Impg2	0.400657	-0.423312	0.008	0.012	1	2
H2-Ob	0.506564	-0.423272	0.025	0.03	1	2
Zfp263	0.0289657	-0.423041	0.068	0.095	1	2
Gcfc2	0.112099	-0.422762	0.031	0.045	1	2
Rnf113a2	0.00183866	-0.42188	0.12	0.171	1	2
Cdc42bpg	0.851398	-0.421575	0.01	0.011	1	2
Hhex	0.00697527	-0.421508	0.214	0.268	1	2
Usp4	0.00109542	-0.421222	0.152	0.21	1	2
Zfp97	0.2057	-0.421028	0.008	0.015	1	2
Mpi	0.302473	-0.420633	0.011	0.017	1	2
Zwilch	0.73689	-0.420492	0.016	0.018	1	2
Dnajb2	0.00607181	-0.420236	0.115	0.159	1	2
Fbxo32	0.0381504	-0.420174	0.045	0.067	1	2
Setdb2	0.0554042	-0.420128	0.065	0.088	1	2
Bbc3	0.00590559	-0.420116	0.138	0.183	1	2
Tbxa2r	0.178965	-0.419995	0.023	0.032	1	2
Gramd1c	0.0911246	-0.419659	0.029	0.044	1	2
Hic2	0.345094	-0.419467	0.026	0.034	1	2
Btbd3	0.807484	-0.41881	0.012	0.013	1	2
BC025920	0.296381	-0.418473	0.01	0.016	1	2
Rab31	0.0744313	-0.41824	0.064	0.085	1	2
Trp53inp2	0.0031977	-0.417942	0.115	0.162	1	2
Trim2	0.270639	-0.417546	0.028	0.037	1	2
Tulp4	2.38516e-07	-0.417509	0.32	0.449	0.00394745	2
Lima1	0.265041	-0.417116	0.006	0.01	1	2
Zfp81	0.0538256	-0.416963	0.03	0.047	1	2
Tmem198	0.621425	-0.416844	0.015	0.018	1	2
Kics2	0.383222	-0.416825	0.017	0.022	1	2
Rangrf	0.169456	-0.416536	0.013	0.021	1	2
Ifi27	2.59702e-06	-0.416519	0.228	0.327	0.0429807	2
Pafah1b2	0.00168175	-0.416327	0.17	0.229	1	2
Tle1	0.232399	-0.416272	0.016	0.023	1	2
Zfp773	0.400792	-0.416128	0.009	0.013	1	2
Zfp961	0.108003	-0.41607	0.051	0.068	1	2
Slc12a7	0.00113099	-0.415936	0.121	0.176	1	2
Ppm1d	0.004768	-0.415755	0.113	0.157	1	2
A630089N07Rik	0.226524	-0.415618	0.049	0.062	1	2
Dusp12	0.0285586	-0.415403	0.06	0.086	1	2
Rab4a	0.0171634	-0.41533	0.067	0.097	1	2
Kdm4a	0.0482063	-0.414872	0.07	0.095	1	2
Acoxl	0.296044	-0.414434	0.021	0.028	1	2
Prickle1	0.132497	-0.414401	0.017	0.027	1	2
Zfp317	0.0345454	-0.414264	0.065	0.091	1	2
Zgrf1	0.0275808	-0.414213	0.026	0.045	1	2
Eprs	0.000128536	-0.41388	0.282	0.368	1	2
Celsr1	0.596684	-0.413835	0.017	0.02	1	2
Mrps18b	0.148909	-0.413797	0.064	0.081	1	2
G6pdx	0.0116313	-0.413777	0.05	0.078	1	2
Ptger2	0.111876	-0.413592	0.023	0.035	1	2
Trip11	3.2836e-05	-0.413379	0.321	0.412	0.543436	2
Thap4	0.295764	-0.412829	0.021	0.028	1	2
Wipi2	0.00231527	-0.412323	0.107	0.154	1	2
Zfp729b	0.0270045	-0.411878	0.038	0.059	1	2
Hexdc	0.398968	-0.411791	0.008	0.011	1	2
Gnl1	0.000104677	-0.41151	0.063	0.114	1	2
Ninj1	0.0172446	-0.411444	0.09	0.124	1	2
Get3	0.0484862	-0.411012	0.08	0.106	1	2
Hivep3	0.0287895	-0.409798	0.102	0.135	1	2
Rnf122	0.0162227	-0.409549	0.036	0.059	1	2
Atp8a2	0.150697	-0.408764	0.009	0.017	1	2
Rps27	6.6069e-53	-0.408751	0.992	0.997	1.09344e-48	2
Rnls	0.0985511	-0.408423	0.016	0.027	1	2
Slc35a5	0.0866766	-0.408087	0.037	0.053	1	2
Dnaja1	4.9488e-12	-0.407952	0.882	0.935	8.19026e-08	2
Rps29	1.05595e-59	-0.407452	0.994	0.998	1.74759e-55	2
Tmem106c	0.269841	-0.406954	0.028	0.037	1	2
Utp25	0.0417067	-0.406916	0.034	0.053	1	2
Shpk	0.0902402	-0.406901	0.025	0.039	1	2
D130040H23Rik	0.0510403	-0.406881	0.102	0.13	1	2
Haus3	0.00251556	-0.406853	0.148	0.202	1	2
Tgtp2	0.279793	-0.406782	0.026	0.035	1	2
Polr3d	0.168597	-0.406542	0.055	0.07	1	2
Sun2	8.03995e-06	-0.406005	0.312	0.417	0.133061	2
Dennd3	0.233497	-0.40585	0.085	0.1	1	2
Cyp4f13	0.0920337	-0.405634	0.074	0.095	1	2
Hacd3	0.0585931	-0.405598	0.102	0.13	1	2
Cercam	0.265725	-0.405557	0.006	0.01	1	2
Pex11b	0.201049	-0.405451	0.039	0.05	1	2
Abi3bp	0.392133	-0.404868	0.014	0.019	1	2
Bend3	0.397485	-0.404756	0.011	0.016	1	2
Foxn2	0.000392808	-0.404573	0.172	0.239	1	2
Zfp592	0.000175856	-0.404207	0.165	0.235	1	2
Ddx1	0.0113319	-0.403944	0.096	0.133	1	2
Ralgps2	0.388995	-0.403837	0.016	0.021	1	2
Mepce	0.00712296	-0.403707	0.109	0.15	1	2
Irs2	0.00384315	-0.403706	0.115	0.162	1	2
Zfp420	0.181437	-0.403457	0.019	0.028	1	2
mt-Nd5	1.34919e-13	-0.403191	0.735	0.839	2.23292e-09	2
Paqr5	0.504922	-0.402907	0.014	0.018	1	2
Bag5	0.0177579	-0.40262	0.072	0.103	1	2
Frrs1	0.0394153	-0.402395	0.071	0.097	1	2
Stambp	0.0854195	-0.402205	0.054	0.073	1	2
Cep63	0.0146267	-0.401884	0.083	0.116	1	2
Sh3tc1	0.905573	-0.4016	0.015	0.016	1	2
Acvr2a	0.0854081	-0.401279	0.084	0.107	1	2
Ubfd1	0.0998037	-0.401053	0.082	0.103	1	2
1600012H06Rik	0.00822912	-0.400891	0.056	0.088	1	2
Tor3a	0.0488857	-0.399654	0.058	0.082	1	2
Polr1e	0.212831	-0.399233	0.033	0.044	1	2
Kdm3a	0.00344211	-0.399057	0.175	0.226	1	2
Tg	0.0449628	-0.399036	0.039	0.059	1	2
Rcbtb1	0.0424561	-0.399031	0.134	0.167	1	2
Cmc2	0.00668793	-0.398283	0.076	0.113	1	2
Ruvbl2	0.121442	-0.398074	0.091	0.111	1	2
Suv39h1	0.0476342	-0.398001	0.023	0.039	1	2
Taf5	0.0617727	-0.397687	0.057	0.078	1	2
Grn	0.182867	-0.397573	0.025	0.036	1	2
Rprd1b	0.0135453	-0.397494	0.117	0.157	1	2
Slc16a6	0.0248647	-0.397389	0.107	0.141	1	2
Phaf1	0.0654811	-0.3971	0.051	0.07	1	2
H2-T24	0.29256	-0.39699	0.021	0.028	1	2
Smad1	0.274281	-0.396932	0.086	0.101	1	2
Cep162	0.0239196	-0.396284	0.069	0.097	1	2
Cenpq	0.000404278	-0.396223	0.206	0.279	1	2
Cnksr3	0.228732	-0.396039	0.077	0.092	1	2
Gm19684	0.00137498	-0.395919	0.107	0.158	1	2
Glp2r	3.96267e-06	-0.395683	0.222	0.322	0.0655822	2
Nmrk1	0.112616	-0.395485	0.037	0.051	1	2
H4c14	0.031477	-0.395453	0.051	0.075	1	2
Ms4a6c	0.0032663	-0.395211	0.084	0.125	1	2
Scrn3	0.114827	-0.39441	0.027	0.04	1	2
Nr4a1	0.00218152	-0.393715	0.37	0.433	1	2
Abcb1a	0.00512698	-0.393692	0.254	0.305	1	2
Cep41	0.134147	-0.393646	0.016	0.026	1	2
Upp1	0.174673	-0.393569	0.006	0.011	1	2
Cntn1	0.187995	-0.39324	0.007	0.012	1	2
Mettl22	0.143019	-0.393209	0.026	0.038	1	2
Il16	8.38161e-05	-0.393153	0.207	0.291	1	2
Smarcd1	0.0137558	-0.392672	0.095	0.131	1	2
Parn	0.0563019	-0.392394	0.095	0.122	1	2
Rfc3	0.0283376	-0.392014	0.043	0.066	1	2
Rundc3b	0.0786997	-0.391814	0.207	0.238	1	2
Tacc2	0.77759	-0.391506	0.024	0.022	1	2
Taf9b	0.0249566	-0.391346	0.03	0.05	1	2
Efhc2	0.504211	-0.391335	0.014	0.018	1	2
Chaf1b	0.23135	-0.390535	0.016	0.023	1	2
Cep89	0.0915154	-0.390196	0.014	0.025	1	2
Slc30a9	0.0260733	-0.389994	0.123	0.159	1	2
Stat5a	0.0232805	-0.389298	0.097	0.131	1	2
Dzip1	0.48863	-0.388878	0.016	0.02	1	2
Sec23a	0.130637	-0.38866	0.096	0.116	1	2
Abca1	0.000328159	-0.388162	0.179	0.251	1	2
Spsb1	0.58088	-0.388109	0.018	0.021	1	2
Gpr180	0.0356351	-0.387591	0.05	0.073	1	2
Nfkbib	0.000367935	-0.387405	0.188	0.258	1	2
Mtus2	0.772	-0.387371	0.014	0.016	1	2
Sipa1l2	0.0225054	-0.387296	0.103	0.136	1	2
Ppp2r3a	0.150712	-0.386834	0.057	0.074	1	2
Nkrf	0.71887	-0.386452	0.017	0.019	1	2
Birc3	3.3353e-05	-0.386252	0.399	0.493	0.551992	2
Tfam	0.122464	-0.385818	0.179	0.205	1	2
Anapc7	0.0918426	-0.385115	0.094	0.117	1	2
Plpp6	0.0143891	-0.38484	0.044	0.07	1	2
Aven	0.00156202	-0.384687	0.215	0.276	1	2
Poc1a	0.708918	-0.383961	0.008	0.01	1	2
Klf8	0.295132	-0.383466	0.023	0.03	1	2
Pkd1l2	0.213805	-0.383094	0.009	0.016	1	2
Klrc3	0.0101526	-0.382855	0.164	0.209	1	2
Snip1	0.00662875	-0.382823	0.098	0.139	1	2
Apol7e	0.0185222	-0.382638	0.162	0.205	1	2
Btf3l4	0.0630038	-0.382408	0.07	0.094	1	2
Tmem108	0.745694	-0.382395	0.031	0.034	1	2
Tti2	0.088957	-0.382147	0.027	0.041	1	2
Skil	0.000865929	-0.382021	0.311	0.385	1	2
Dvl1	0.139325	-0.381471	0.03	0.043	1	2
Dus4l	0.218253	-0.381389	0.048	0.06	1	2
Zfp322a	0.00964937	-0.38122	0.093	0.131	1	2
Zfp971	0.231991	-0.3808	0.022	0.03	1	2
Tdg	0.028357	-0.380685	0.094	0.126	1	2
St6galnac6	0.370898	-0.380578	0.021	0.027	1	2
Prkd2	0.0103741	-0.380147	0.1	0.139	1	2
Gabpb1	0.00415283	-0.379562	0.234	0.29	1	2
Mterf1a	0.0268329	-0.379384	0.091	0.123	1	2
Ulk3	0.144691	-0.379356	0.023	0.035	1	2
Nudt19	0.085938	-0.379356	0.091	0.114	1	2
Gm42906	0.234486	-0.378406	0.018	0.026	1	2
Actn1	0.483195	-0.378235	0.041	0.048	1	2
Itprid2	0.0140948	-0.377491	0.078	0.112	1	2
Emid1	0.0298417	-0.377303	0.105	0.139	1	2
Csad	0.397033	-0.377178	0.03	0.037	1	2
C87436	0.0008905	-0.376991	0.158	0.217	1	2
Rragb	0.128496	-0.376879	0.049	0.065	1	2
Mprip	0.00418889	-0.376777	0.165	0.218	1	2
Ccdc191	0.407541	-0.376526	0.039	0.047	1	2
Nudt16l1	0.008847	-0.376066	0.073	0.109	1	2
Syvn1	0.159469	-0.376046	0.061	0.077	1	2
Atp10a	0.000550262	-0.375723	0.285	0.364	1	2
Ndst1	0.220329	-0.374695	0.067	0.082	1	2
Mettl1	0.137998	-0.374485	0.054	0.069	1	2
Acox1	0.0460829	-0.374411	0.091	0.12	1	2
H2-Q10	0.115137	-0.374398	0.029	0.043	1	2
Gmeb1	0.000697194	-0.373976	0.075	0.121	1	2
Rab8b	1.5183e-06	-0.373907	0.645	0.744	0.0251278	2
Ndor1.1	0.294578	-0.37369	0.009	0.015	1	2
H2bc4	0.0845316	-0.373575	0.05	0.068	1	2
Mphosph6	0.0911773	-0.373334	0.086	0.109	1	2
Klrc1	1.25819e-05	-0.372717	0.451	0.535	0.208231	2
Fundc1	0.00558567	-0.371977	0.081	0.12	1	2
Pnrc1	1.95322e-10	-0.371665	0.76	0.857	3.23257e-06	2
Hemgn	0.131948	-0.370856	0.016	0.026	1	2
Klf4	0.0150783	-0.37063	0.204	0.256	1	2
Slc7a1	0.000741933	-0.370126	0.368	0.444	1	2
Zbtb33	0.234367	-0.370056	0.055	0.068	1	2
Gch1	0.000843371	-0.369933	0.262	0.333	1	2
Zfp995	0.177648	-0.369867	0.016	0.025	1	2
Dkkl1	0.683342	-0.369597	0.01	0.012	1	2
Trak2	0.00599172	-0.369427	0.139	0.187	1	2
Fam114a1	0.666503	-0.369396	0.011	0.013	1	2
Pnpo	0.0751784	-0.369317	0.047	0.066	1	2
Tecpr2	0.600079	-0.368803	0.034	0.038	1	2
Stx17	0.00666944	-0.368676	0.117	0.16	1	2
Cyfip1	0.00854958	-0.368527	0.09	0.129	1	2
Nubpl	0.135002	-0.36845	0.043	0.058	1	2
Gdpd5	0.109639	-0.36832	0.047	0.064	1	2
Vps39	0.0255535	-0.368006	0.048	0.073	1	2
Tgfbrap1	0.0521377	-0.367763	0.072	0.097	1	2
Nfkb1	0.00169913	-0.367634	0.668	0.728	1	2
Tshz3	0.000379732	-0.367589	0.224	0.296	1	2
Pik3r2	0.230339	-0.367426	0.014	0.021	1	2
Jund	7.93242e-17	-0.367387	0.968	0.984	1.31282e-12	2
Apobec1	0.0198583	-0.367249	0.075	0.106	1	2
Pde4d	0.0104787	-0.367133	0.119	0.161	1	2
Togaram2	0.286639	-0.367114	0.008	0.012	1	2
Kdm4b	0.255478	-0.367092	0.085	0.1	1	2
Tmem64	0.0194683	-0.366779	0.063	0.092	1	2
Cyp39a1	0.206647	-0.366702	0.008	0.015	1	2
B3galt2	0.742534	-0.365841	0.019	0.017	1	2
Ubb	1.40562e-25	-0.365567	0.993	0.993	2.32631e-21	2
Eaf2	0.00284946	-0.365097	0.046	0.079	1	2
Mvk	0.144806	-0.365092	0.035	0.048	1	2
Hsf4	0.231874	-0.36484	0.016	0.023	1	2
Tmem35b	0.115544	-0.364514	0.033	0.047	1	2
Zmym6	0.0219761	-0.364156	0.038	0.06	1	2
Cep57l1	0.234424	-0.364068	0.07	0.085	1	2
Jaml	0.279059	-0.363846	0.071	0.084	1	2
Clic5	0.297911	-0.363583	0.01	0.016	1	2
Sbf2	0.856044	-0.363281	0.017	0.018	1	2
Nemp1	0.0566692	-0.362801	0.059	0.082	1	2
Hps1	0.00483206	-0.362634	0.056	0.091	1	2
Kit	0.00889197	-0.362625	0.174	0.221	1	2
Fmr1	8.88909e-05	-0.362541	0.201	0.286	1	2
Ndufaf6	0.17996	-0.362058	0.031	0.043	1	2
Asb7	0.265323	-0.361886	0.03	0.039	1	2
Bcl2l11	0.0780469	-0.361293	0.468	0.489	1	2
Fam234b	0.535537	-0.360758	0.009	0.012	1	2
Map3k1	0.00440893	-0.360677	0.355	0.416	1	2
Casz1	0.547299	-0.360081	0.031	0.036	1	2
Tsc22d2	0.00292358	-0.360063	0.27	0.334	1	2
Slc17a9	0.111163	-0.359717	0.049	0.066	1	2
Garre1	0.00701597	-0.359407	0.164	0.215	1	2
Crybg3	0.213055	-0.359096	0.036	0.047	1	2
Ebpl	0.0693897	-0.358896	0.095	0.121	1	2
Rnf170	0.114549	-0.358676	0.031	0.045	1	2
Ric3	0.283444	-0.35851	0.008	0.012	1	2
Zfc3h1	0.00289591	-0.357612	0.219	0.281	1	2
Mpdu1	0.0296533	-0.35746	0.123	0.158	1	2
Ap3m2	0.0410255	-0.357206	0.054	0.077	1	2
Mbtps1	0.089978	-0.357001	0.126	0.151	1	2
Ccz1	0.0105197	-0.356999	0.181	0.227	1	2
Map3k14	0.000203184	-0.356995	0.318	0.403	1	2
Tchp	0.0331183	-0.356393	0.021	0.037	1	2
Prdm4	0.296874	-0.356255	0.038	0.047	1	2
Homer3	0.651488	-0.355649	0.012	0.015	1	2
Cd74	8.19269e-07	-0.354675	0.118	0.204	0.0135589	2
Wdr49	0.142694	-0.354589	0.019	0.029	1	2
Icam1	0.0010751	-0.354485	0.441	0.516	1	2
Lmtk3	0.277068	-0.354191	0.007	0.011	1	2
Ly96	0.527851	-0.353847	0.032	0.037	1	2
Cbr4	0.680777	-0.353831	0.02	0.022	1	2
Itk	0.000145535	-0.353706	0.518	0.602	1	2
Arhgap6	0.413769	-0.353469	0.048	0.056	1	2
Eogt	0.696157	-0.353159	0.026	0.029	1	2
Pms1	0.0983561	-0.352553	0.059	0.078	1	2
Stk16	0.00498303	-0.352516	0.136	0.183	1	2
Sugct	0.0601996	-0.352352	0.021	0.035	1	2
Oasl2	0.303218	-0.352276	0.011	0.017	1	2
Actr5	0.0709035	-0.352174	0.064	0.086	1	2
Lca5	0.132063	-0.35206	0.015	0.025	1	2
Hspa9	0.00231408	-0.352012	0.224	0.284	1	2
Slc66a2	0.176711	-0.351788	0.015	0.023	1	2
Micall1	0.515104	-0.351211	0.073	0.066	1	2
Tspyl1	0.00411417	-0.351154	0.128	0.178	1	2
Mtbp	0.0450279	-0.350952	0.036	0.055	1	2
Serpine2	0.184048	-0.350868	0.027	0.038	1	2
Klri1	0.401805	-0.350708	0.076	0.086	1	2
Elovl5	0.00113834	-0.350447	0.37	0.449	1	2
Nhsl1	0.386344	-0.350255	0.017	0.022	1	2
Luzp1	0.0146729	-0.350047	0.207	0.255	1	2
Dot1l	0.00511025	-0.349702	0.12	0.167	1	2
Trim56	0.111634	-0.349697	0.102	0.125	1	2
Nsun6	0.00275233	-0.34952	0.149	0.205	1	2
Dnajb12	0.00701371	-0.349391	0.063	0.097	1	2
Slc2a9	0.304188	-0.349374	0.036	0.045	1	2
Mcph1	0.0414848	-0.349371	0.087	0.115	1	2
Tmsb15a	0.111233	-0.349034	0.06	0.078	1	2
Slc22a5	0.22342	-0.348478	0.034	0.045	1	2
Gm11808	1.56255e-05	-0.348316	0.33	0.427	0.258602	2
Spg7	0.141297	-0.34805	0.109	0.131	1	2
Ccdc6	0.090064	-0.34787	0.111	0.135	1	2
Zfp975	0.305686	-0.347251	0.016	0.022	1	2
Tnfrsf10b	0.220095	-0.346736	0.011	0.018	1	2
Meig1	0.236378	-0.346639	0.022	0.03	1	2
Gmppa	0.19101	-0.346188	0.047	0.06	1	2
Vav2	0.182078	-0.346002	0.023	0.032	1	2
Pcyox1	0.232257	-0.34496	0.025	0.035	1	2
Chfr	0.000332536	-0.34466	0.232	0.308	1	2
Net1	0.416019	-0.344332	0.055	0.064	1	2
Esf1	0.0163839	-0.344248	0.197	0.245	1	2
Dpm3	1.14309e-08	-0.343979	0.467	0.614	0.000189182	2
Patj	0.0348343	-0.343837	0.086	0.115	1	2
Tpcn1	0.146998	-0.343717	0.05	0.065	1	2
Enpp1	0.287439	-0.343526	0.068	0.081	1	2
Eif3j1	2.61069e-05	-0.34348	0.352	0.466	0.432069	2
Sh3bp5l	0.184993	-0.343462	0.028	0.039	1	2
Snrpa1	0.0116887	-0.343448	0.221	0.268	1	2
Gpbp1	0.00237421	-0.343398	0.368	0.437	1	2
Urb2	0.0868345	-0.343067	0.023	0.037	1	2
Tmem176b	0.00379296	-0.342912	0.091	0.134	1	2
Orai2	0.0195126	-0.342504	0.159	0.201	1	2
Trim35	0.118127	-0.342339	0.07	0.088	1	2
Nkapd1	0.258149	-0.342223	0.112	0.129	1	2
Nr1d2	0.00454443	-0.342137	0.126	0.173	1	2
Cinp	0.0009277	-0.342067	0.058	0.1	1	2
Nfkbie	0.000494916	-0.341644	0.204	0.272	1	2
Ccdc34	0.114383	-0.341455	0.043	0.059	1	2
Josd1	0.0612164	-0.341267	0.086	0.111	1	2
Zfp105	0.402272	-0.341184	0.009	0.013	1	2
Alms1	0.884061	-0.340892	0.028	0.027	1	2
Bpnt1	0.393373	-0.340887	0.059	0.068	1	2
Zfp35	0.374119	-0.340551	0.019	0.025	1	2
Slc10a3	0.0678041	-0.340357	0.024	0.039	1	2
Prdx6	0.000712649	-0.340351	0.444	0.525	1	2
Tlcd1	0.29589	-0.339457	0.022	0.029	1	2
Cfap77	0.984504	-0.339092	0.023	0.023	1	2
Fastkd1	0.183713	-0.338614	0.021	0.03	1	2
Tk2	0.0251147	-0.337821	0.104	0.139	1	2
Parp6	0.0574598	-0.337692	0.061	0.084	1	2
Fuz	0.141591	-0.337358	0.032	0.045	1	2
Serac1	0.399746	-0.337343	0.011	0.016	1	2
Relt	0.265998	-0.337192	0.058	0.07	1	2
Slc27a6	0.749464	-0.337183	0.023	0.026	1	2
Arf4	6.51106e-07	-0.337003	0.758	0.843	0.0107758	2
Asb3	0.0014427	-0.336993	0.258	0.328	1	2
Atp1a3	0.49967	-0.336931	0.015	0.019	1	2
Fktn	0.547643	-0.33644	0.031	0.036	1	2
Nbn	0.128819	-0.336401	0.05	0.066	1	2
Ddx54	0.0033608	-0.336202	0.157	0.21	1	2
Tbl3	0.0581787	-0.33615	0.079	0.104	1	2
Herpud1	0.000252815	-0.335919	0.404	0.489	1	2
Chchd5	0.0254924	-0.335867	0.081	0.112	1	2
Prcc	0.155479	-0.335742	0.068	0.085	1	2
Il12rb2	0.000145094	-0.335688	0.548	0.633	1	2
Mkrn2	0.0711568	-0.335527	0.058	0.079	1	2
Klhl24	0.000638835	-0.335463	0.3	0.377	1	2
Dctn4	0.00284466	-0.335362	0.225	0.289	1	2
Gusb	0.0374982	-0.334917	0.077	0.105	1	2
Gm527	0.0574326	-0.334661	0.02	0.034	1	2
Tank	0.000397832	-0.33451	0.283	0.369	1	2
Pdcd1lg2	0.00981128	-0.334367	0.18	0.232	1	2
Mars2	0.233021	-0.334356	0.023	0.032	1	2
Metap1d	0.100023	-0.333775	0.07	0.089	1	2
Rwdd3	0.724893	-0.333723	0.017	0.019	1	2
Mttp	0.269594	-0.333632	0.032	0.041	1	2
Cdk5rap1	0.0384956	-0.333061	0.095	0.124	1	2
Fam110b	0.546497	-0.332293	0.008	0.01	1	2
Ttll7	0.399109	-0.331767	0.008	0.012	1	2
Rcn2	0.0072491	-0.331192	0.153	0.201	1	2
Ngrn	0.0295374	-0.331115	0.079	0.109	1	2
Atg13	0.0218821	-0.330892	0.148	0.188	1	2
Zfp931	0.171332	-0.330776	0.041	0.055	1	2
Pip5k1c	0.0304373	-0.330675	0.095	0.126	1	2
Serpinb9b	0.459509	-0.330576	0.074	0.083	1	2
Ifngr2	0.884085	-0.330468	0.016	0.017	1	2
H4c11	0.265041	-0.330401	0.006	0.01	1	2
Rsl1d1	0.000146537	-0.330136	0.305	0.395	1	2
Nol11	0.0536462	-0.329875	0.117	0.147	1	2
St8sia6	0.103849	-0.329763	0.009	0.018	1	2
Tob1	0.00120155	-0.329677	0.245	0.313	1	2
Zfp456	0.649739	-0.329489	0.012	0.015	1	2
Pcyt1a	0.0129311	-0.329328	0.213	0.264	1	2
Zfp414	0.224503	-0.329089	0.047	0.059	1	2
Zdhhc7	0.130801	-0.328696	0.047	0.063	1	2
Cstf2t	0.0255617	-0.32846	0.056	0.083	1	2
Dpysl2	0.0271231	-0.328154	0.113	0.149	1	2
Polr3h	0.141515	-0.328147	0.037	0.05	1	2
Enc1	0.75166	-0.327991	0.058	0.062	1	2
Kcnk5	0.23577	-0.327904	0.072	0.087	1	2
Qpctl	0.474886	-0.327816	0.018	0.022	1	2
Nufip1	0.049748	-0.327789	0.113	0.144	1	2
Arsk	0.184438	-0.327464	0.027	0.038	1	2
Nanp	0.145857	-0.327289	0.026	0.038	1	2
Fam107b	1.86392e-08	-0.326954	0.727	0.829	0.00030848	2
Cpne7	0.075523	-0.326911	0.041	0.059	1	2
Slc35f6	0.576979	-0.326776	0.028	0.032	1	2
Tmem170b	0.133335	-0.326671	0.046	0.062	1	2
Gpn1	0.021451	-0.326406	0.061	0.089	1	2
Peli2	0.115077	-0.325905	0.03	0.044	1	2
Aldh6a1	0.374897	-0.325546	0.022	0.028	1	2
Zfp52	0.00453458	-0.325349	0.193	0.248	1	2
Arhgap21	0.00387266	-0.325245	0.133	0.181	1	2
Dnase1l2	0.707835	-0.325218	0.008	0.01	1	2
Slc5a11	0.546497	-0.324853	0.008	0.01	1	2
Ptprk	0.940427	-0.324605	0.032	0.031	1	2
Bsn	0.17876	-0.324551	0.032	0.044	1	2
Vps45	0.0387814	-0.324445	0.053	0.076	1	2
Tex30	0.0498256	-0.324417	0.12	0.152	1	2
Slfn2	0.000169609	-0.324242	0.437	0.52	1	2
Spink13	0.232925	-0.324036	0.016	0.023	1	2
Hnrnpa3	8.75741e-10	-0.323905	0.737	0.832	1.44935e-05	2
Vps26c	0.0660466	-0.323851	0.082	0.106	1	2
Inppl1	0.679796	-0.323607	0.01	0.012	1	2
Myo3b	0.051025	-0.323486	0.096	0.124	1	2
Hbp1	0.0128924	-0.323399	0.211	0.258	1	2
Aebp2	0.00386177	-0.322792	0.255	0.315	1	2
Fancm	0.729415	-0.322506	0.033	0.036	1	2
Tbl1x	0.000458834	-0.322374	0.396	0.475	1	2
Itpr1	0.000351479	-0.322236	0.324	0.402	1	2
Krr1	0.162411	-0.322138	0.126	0.148	1	2
Klrb1f	4.03748e-06	-0.321987	0.504	0.604	0.0668202	2
Cubn	0.374736	-0.321879	0.022	0.028	1	2
Idi1	0.617947	-0.321647	0.047	0.051	1	2
Agbl3	0.234507	-0.321611	0.016	0.023	1	2
Ppig	0.00102221	-0.321609	0.487	0.553	1	2
Ddx27	0.0191997	-0.321572	0.129	0.168	1	2
Snx16	0.0195223	-0.321551	0.06	0.088	1	2
Prrg4	0.297226	-0.321022	0.039	0.048	1	2
Rnf214	0.28531	-0.320826	0.102	0.116	1	2
Bach2	6.70294e-05	-0.320265	0.739	0.799	1	2
Ppat	0.00150452	-0.320236	0.116	0.168	1	2
Ift52	0.0409667	-0.320112	0.108	0.139	1	2
Vcl	0.0888832	-0.320076	0.164	0.195	1	2
Zfp324	0.397565	-0.32004	0.008	0.012	1	2
1700029J07Rik	0.404454	-0.319997	0.01	0.015	1	2
Fbxl22	0.522288	-0.319854	0.011	0.015	1	2
Zfp316	0.540665	-0.319495	0.008	0.011	1	2
Egr3	0.763273	-0.318719	0.015	0.017	1	2
Ppp2r5d	0.220693	-0.318305	0.033	0.044	1	2
Kif18a	0.526651	-0.318073	0.067	0.074	1	2
Vps37b	0.00257142	-0.318008	0.763	0.785	1	2
Tnfrsf8	0.846867	-0.317546	0.018	0.019	1	2
Eeig2	0.247717	-0.317509	0.066	0.079	1	2
Pals1	0.0585097	-0.317427	0.094	0.122	1	2
Map1lc3a	0.0210882	-0.317415	0.122	0.16	1	2
Wee1	0.161265	-0.316891	0.042	0.056	1	2
Ythdc2	0.113237	-0.316804	0.106	0.129	1	2
Gcnt7	0.095588	-0.316739	0.036	0.051	1	2
Rcl1	0.0965252	-0.316541	0.109	0.134	1	2
Mcfd2	0.298999	-0.316471	0.051	0.062	1	2
Baiap2	0.0813126	-0.315688	0.118	0.147	1	2
Ubtd1	0.412639	-0.315519	0.038	0.045	1	2
Tnfrsf12a	0.582079	-0.315261	0.019	0.022	1	2
Dcun1d3	0.0540495	-0.315012	0.075	0.1	1	2
Snx19	0.225375	-0.315001	0.047	0.059	1	2
Ubl3	0.000590281	-0.314801	0.383	0.456	1	2
Mcoln2	0.00883153	-0.314801	0.07	0.105	1	2
Zdhhc24	0.111619	-0.314796	0.042	0.058	1	2
Tnip1	0.00891768	-0.314666	0.247	0.3	1	2
Tmem39a	0.0191485	-0.314557	0.12	0.159	1	2
Rbm45	0.0249233	-0.314408	0.055	0.081	1	2
Gemin2	0.211092	-0.313569	0.054	0.067	1	2
Ilvbl	0.057513	-0.313351	0.086	0.112	1	2
Hs3st3b1	0.00351684	-0.312846	0.17	0.228	1	2
Pdxk	0.107523	-0.312749	0.019	0.03	1	2
Rnf125	0.0290741	-0.312686	0.255	0.302	1	2
Alkbh4	0.0593108	-0.312508	0.04	0.059	1	2
Rpl10	3.57433e-20	-0.312248	0.979	0.996	5.91552e-16	2
Tmem219	0.0741448	-0.312142	0.118	0.147	1	2
Fam184a	0.122423	-0.312048	0.098	0.12	1	2
Atp5k	2.01214e-06	-0.312033	0.521	0.631	0.0333009	2
Chac2	0.246646	-0.311945	0.04	0.051	1	2
Lmf1	0.0868404	-0.3117	0.048	0.066	1	2
Eif1	1.90836e-14	-0.3113	0.991	0.999	3.15834e-10	2
Baz1a	0.00266548	-0.311286	0.452	0.522	1	2
Phf11c	0.373192	-0.311031	0.021	0.027	1	2
Igf1r	0.0803506	-0.310952	0.067	0.088	1	2
Fchsd1	0.52971	-0.31045	0.01	0.013	1	2
Map7	0.755639	-0.310443	0.023	0.025	1	2
Naip5	0.00937988	-0.310317	0.063	0.096	1	2
Ankrd9	0.304664	-0.310076	0.018	0.025	1	2
B3galt6	0.416028	-0.309192	0.027	0.034	1	2
Nfkb2	0.00210155	-0.308789	0.172	0.232	1	2
Slc16a10	0.203151	-0.308196	0.071	0.087	1	2
Klrb1b	8.86525e-05	-0.30809	0.227	0.313	1	2
Gprasp1	0.080658	-0.308076	0.119	0.145	1	2
Rad51b	0.05691	-0.307628	0.035	0.053	1	2
Zfp984	0.0264165	-0.307587	0.152	0.195	1	2
Pdp1	0.242096	-0.307477	0.056	0.069	1	2
Creb1	8.95639e-05	-0.307254	0.523	0.625	1	2
Fdxr	0.0991398	-0.30708	0.069	0.088	1	2
Was	0.00141532	-0.307037	0.207	0.272	1	2
Zfp326	0.0121652	-0.306967	0.211	0.255	1	2
Spindoc	0.226343	-0.306892	0.053	0.066	1	2
Ston2	0.370648	-0.306884	0.023	0.029	1	2
Golph3l	0.145342	-0.306345	0.075	0.094	1	2
Zranb3	0.774396	-0.306326	0.022	0.023	1	2
Fgd3	0.0205832	-0.305998	0.179	0.22	1	2
Ripor3	0.732281	-0.305946	0.016	0.018	1	2
Apobr	0.0275568	-0.305843	0.132	0.169	1	2
Slc41a2	0.0207872	-0.305106	0.127	0.164	1	2
Tpra1	0.251567	-0.30438	0.038	0.048	1	2
Bank1	0.794272	-0.304309	0.021	0.022	1	2
Tmem80	0.188783	-0.304207	0.055	0.07	1	2
Egln3	0.293908	-0.304009	0.022	0.029	1	2
Gins3	0.708328	-0.303498	0.018	0.02	1	2
Fam199x	0.11586	-0.303435	0.04	0.056	1	2
Vps13c	0.011373	-0.303421	0.111	0.151	1	2
Ube2s	0.00177857	-0.303347	0.242	0.317	1	2
Plekhf1	0.183206	-0.302846	0.022	0.031	1	2
Ccdc186	0.0512677	-0.302603	0.119	0.151	1	2
Sec14l1	0.827192	-0.302537	0.057	0.059	1	2
Fyttd1	0.00382768	-0.302335	0.138	0.189	1	2
Zfp703	0.107934	-0.302208	0.052	0.069	1	2
Rpl37a	1.23809e-32	-0.302074	0.995	0.997	2.04903e-28	2
Oaz2	0.125114	-0.302034	0.056	0.074	1	2
Tmem161a	0.0490638	-0.30173	0.039	0.059	1	2
Pkp4	0.0181253	-0.301284	0.302	0.352	1	2
Zfp622	0.000998259	-0.301207	0.27	0.34	1	2
Ece1	0.101992	-0.301035	0.079	0.102	1	2
Bhlhe40	0.00600246	-0.300991	0.504	0.548	1	2
Diaph3	0.321202	-0.300854	0.034	0.043	1	2
Lin9	0.328274	-0.300635	0.032	0.04	1	2
Zfp568	0.0756886	-0.300315	0.078	0.102	1	2
Fbxo45	0.119072	-0.300295	0.03	0.044	1	2
Nr3c2	0.0538992	-0.300094	0.103	0.132	1	2
Cfap46	0.981524	-0.300021	0.012	0.012	1	2
Fam227a	0.390593	-0.300003	0.017	0.022	1	2
Ppp1r10	0.000353615	-0.299566	0.491	0.564	1	2
Hexim1	0.0147601	-0.299353	0.17	0.216	1	2
Ptpn14	0.665891	-0.299324	0.011	0.013	1	2
Mfap1a	0.0175196	-0.299072	0.177	0.221	1	2
Anxa4	0.170914	-0.298944	0.013	0.021	1	2
Cfap126	0.0607709	-0.298538	0.04	0.059	1	2
Tgoln1	0.000528532	-0.298449	0.405	0.483	1	2
Zgpat	0.0207988	-0.298046	0.129	0.169	1	2
Hecw2	0.535241	-0.298035	0.009	0.012	1	2
Angpt1	0.000266778	-0.296663	0.221	0.3	1	2
Pik3cg	0.0163066	-0.295939	0.154	0.196	1	2
Ddx11	0.269555	-0.295854	0.045	0.056	1	2
Smarcd3	0.282479	-0.295622	0.025	0.034	1	2
Cerk	0.00158121	-0.295598	0.271	0.341	1	2
Atg101	0.0589164	-0.295585	0.152	0.186	1	2
Per1	0.00169568	-0.295583	0.258	0.324	1	2
Elac2	0.59298	-0.29547	0.037	0.041	1	2
Dnajc4	0.0422159	-0.295327	0.08	0.107	1	2
S1pr2	0.0938917	-0.295224	0.03	0.045	1	2
N6amt1	0.0250818	-0.295131	0.063	0.091	1	2
Slc48a1	0.0494861	-0.295046	0.058	0.082	1	2
Psmd5	0.0215634	-0.294932	0.118	0.155	1	2
Cdh22	0.3356	-0.294408	0.031	0.039	1	2
Osgep	0.0181052	-0.294399	0.171	0.216	1	2
Pex13	0.128723	-0.294339	0.175	0.2	1	2
Arfip2	0.109346	-0.294007	0.047	0.064	1	2
Acot11	0.0882478	-0.293734	0.025	0.039	1	2
Gle1	0.0511926	-0.293351	0.128	0.159	1	2
Ccnyl1	0.0607126	-0.293246	0.055	0.076	1	2
Rpl37	9.97123e-26	-0.292868	0.985	0.998	1.65024e-21	2
Ripk3	0.2417	-0.292692	0.041	0.053	1	2
Sec62	3.20356e-06	-0.292653	0.576	0.692	0.053019	2
Galnt2	0.00236288	-0.292413	0.41	0.487	1	2
Eif2b1	0.308832	-0.292358	0.057	0.068	1	2
Lysmd2	0.116597	-0.292216	0.034	0.048	1	2
1110059G10Rik	0.0240011	-0.292197	0.092	0.125	1	2
Gabbr1	0.00104645	-0.292151	0.102	0.154	1	2
Tyk2	0.00171599	-0.291972	0.214	0.281	1	2
Serinc5	0.417738	-0.291919	0.027	0.034	1	2
Ints15	0.0762886	-0.291745	0.043	0.062	1	2
0610030E20Rik	0.0433556	-0.291637	0.105	0.135	1	2
Ccdc174	0.00171343	-0.291024	0.194	0.258	1	2
Zfp51	0.121204	-0.290667	0.082	0.103	1	2
Phlda1	0.0194775	-0.290648	0.232	0.279	1	2
Fry	0.023167	-0.29042	0.196	0.24	1	2
Abcg1	0.00104307	-0.29037	0.375	0.451	1	2
Gdap2	0.258256	-0.290175	0.092	0.107	1	2
Zbtb43	0.309439	-0.28993	0.059	0.07	1	2
Mtcp1	0.564573	-0.289912	0.029	0.034	1	2
Mid1ip1	0.0302362	-0.289721	0.068	0.096	1	2
Nat10	0.27171	-0.28891	0.046	0.057	1	2
Stard3	0.00997936	-0.288738	0.076	0.112	1	2
Trip4	0.0314933	-0.287711	0.158	0.196	1	2
Ppp2cb	0.00363655	-0.287689	0.173	0.23	1	2
Pmepa1	0.0987828	-0.287495	0.071	0.093	1	2
Spef2	0.186816	-0.287316	0.025	0.036	1	2
Ttc3	0.0567446	-0.287082	0.236	0.275	1	2
Trnt1	0.0398885	-0.285946	0.095	0.125	1	2
Crkl	0.129141	-0.285904	0.123	0.148	1	2
Wdr12	0.55846	-0.28589	0.066	0.072	1	2
Slc41a1	0.380084	-0.285822	0.045	0.054	1	2
Ptrhd1	0.095368	-0.285752	0.106	0.131	1	2
Prrc2b	0.000140325	-0.285489	0.443	0.525	1	2
Gm20708	0.2057	-0.285334	0.008	0.015	1	2
Zfp219	0.284458	-0.285122	0.025	0.034	1	2
Yju2	0.243496	-0.284686	0.065	0.078	1	2
Slc25a20	0.164294	-0.284659	0.082	0.1	1	2
Zfp955b	0.0737496	-0.284582	0.037	0.054	1	2
Hsf2	0.403987	-0.284556	0.03	0.037	1	2
Zdhhc4	0.0950163	-0.284164	0.07	0.091	1	2
Topors	0.3543	-0.284054	0.182	0.199	1	2
Arl5c	0.0207884	-0.283589	0.182	0.224	1	2
Tpst1	0.802352	-0.283483	0.011	0.01	1	2
Sms	0.00118453	-0.283202	0.367	0.445	1	2
Apbb3	0.244053	-0.283029	0.041	0.053	1	2
Nfe2l1	0.0152911	-0.282843	0.104	0.141	1	2
Clp1	0.00498712	-0.282734	0.114	0.159	1	2
Hivep2	0.00229875	-0.28232	0.626	0.692	1	2
Mag	0.504385	-0.28123	0.037	0.043	1	2
Impact	0.0857777	-0.281226	0.432	0.469	1	2
Pigyl	0.132693	-0.280668	0.083	0.103	1	2
Ubxn2a	0.00262584	-0.280588	0.27	0.338	1	2
Fam124b	0.175145	-0.280538	0.036	0.048	1	2
[truncated: 5,540 more rows]

## Sheet: WT ECTV vs Ifna ECTV clu4-mDC
	p_val	avg_log2FC	pct.1	pct.2	p_val_adj	cluster		high in WT ECTV 1 dpi (-)	high in Ifna ko ECTV 1 dpi (+)
[truncated: 9,978 more rows]

[truncated: 6 more sheets: WT ECTV vs Ifna ECTV clu6-pDC, WT ECTV vs Ifna ECTV clu8-iMO, WT ECTV vs Ifnb1 ECTV clu2-NK, WT ECTV vs Ifnb1 ECTV clu4-mDC, WT ECTV vs Ifnb1 ECTV clu6-pDC, WT ECTV vs Ifnb1 ECTV clu8-mDC]
