# Supplementary material for: Interferon-α and -β subtypes have temporally distinct roles in containing viral spread and protecting vital organs
Source: Research Square preprint supplement (doi:10.21203/rs.3.rs-9077466/v1), 2026-04-08
Supplement: Supplementary file 3 [file 93e037f5d46c6024e12d716e.xlsx]

## Sheet: Cluster annotation
clusters	cell annotation	ADT	RNA
0	ILC2	CD27, CD8	Themis, Cd3d, Cd3e, Id3
1	ILC3	CD103, CD169	Rorc, Rora, Gata3, Icos, Cd3d, Cd3e, Il23r, Il17a, Il17f, Ccr2
2	NK cells	NK1.1, NKp46, CD11c	Eomes, GzmB, Ccr2, Tbx21, Prf1, Zbtb46, Ifng
3	ILC2	Ly6C, CD27	Eomes, Cd3d, Cd3e, Tbx21, Ifng
4	mDCs	MHCII high, CD11c, CD207, CD86, CD80	Zbtb46, Batf3, Apol7c, Ccr7
5	ILC2	CD27	Themis, Eomes, Cd3d, Cd3e, Id3
6	pDC	SiglecH, Ly6C, CD11c, CD4, CD8	Clec9a, Il17c, Irf7, Ifnar1, Ifnar2
7	ILC3	CD103, CD169, CD27	Rora, Gata3, Icos, Ccr2
8	iMOs	Ly6C, CD11b, F4-80, CD11c, CD80	Lyz2, Lyz1, Ccr2, Cxcl9, Irf7, Ifnar1, Ifnar2, Ifnlr1
9	cDC	MHCII, CD11c, CD80, CD8	Clec9a, Ccr2 low, Zbtb46, Batf3, Xcr1, Cxcl9, Ifnlr1
10	cDC	MHCII, CD11c, CD80, CD8	Clec9a, Zbtb46, Batf3, Xcr1, Cxcl9, Ifnlr1
11	Neutrophil	Ly6G, CD11b	Lyz2, Irf7, Ifnar2, Ifnlr1, Siglecf
12	ILC1	NKp46, CD169, CD4	Rorc, Rora, Gata3, Il23r, Tbx21, Zbtb46, Batf3
13	B cells	MHCII, CD80	Cd19, Il17c
14	parenchymal cell	Ly6C	Cd3d, Ccr7, S100g, Evx1
15	ILC2	CD27, CD86, CD4	Gata3, Icos, Cd3d, Cd3e, Npas4, Foxp3
16	Basophils	CD11b	Mcpt8, GzmB, Siglecf
17	granulocyte	Ly6G, Ly6C, CD11b, CD4, SiglecH	Clec9a, Lyz2, Il17d, Irf7, Ifnar1, ifnar2, Dgat2l6, Vtcn1, Epcam, SiglecF
18	endothelial cell	CD207, CD80	Lyve1, Prox1, Gata3, Zbtb46, Ifnlr1
19	mast cell		Lyz1, Ifnar2, Mrgprb1, Tpsb2, Mcpt4

## Sheet: Cell %
% consolidated	clusters	WT naïve	WT ECTV d1	Ifnb1 ko ECTV d1	Ifna ko ECTV d1	Ifnar1 ko ECTV d1
ILC2	0+3+5+15	43.3116	46.5649	51.2724	54.3317	53.219
ILC3	1+7	12.538	17.8576	14.2941	14.4925	12.1029
NK cells	2	11.1786	11.1876	8.13807	10.6935	8.82501
mDCs	4	7.38973	4.42998	4.51835	4.29146	4.65624
pDC	6	2.67534	2.36516	4.46796	2.60302	4.26963
iMOs	8	3.57195	2.69053	2.96464	2.47236	1.56329
cDC	9	6.50759	4.79289	5.66893	4.24121	4.55539
Neutrophil	11	3.5141	2.96584	2.1248	1.69849	2.42057
ILC1	12	3.42733	2.45276	1.94004	1.67839	1.765
B cells	13	3.29718	1.81454	1.72168	0.693467	2.30291
parenchymal cell	14	1.56182	1.91465	1.43613	1.22613	2.89124
Basophils	16	0.375994	0.488049	0.823045	1.13568	1.10943
Granulocytes	17	0.419378	0.325366	0.361132	0.201005	0.151286
endothelial cell	18	0.173536	0.112627	0.125976	0.160804	0.0840477
mast cell	19	0.0578453	0.0375422	0.142773	0.080402	0.0840477
		100	100	100	100	100

## Sheet: Cell #
#	clusters	WT naïve	WT ECTV d1	Ifnb1 ko ECTV d1	Ifna ko ECTV d1	Ifnar1 ko ECTV d1
ILC2	0	2131	2780	4546	3974	2372
ILC3	1	639	1160	1288	1102	609
NK cells	2	773	894	969	1064	525
ILC2	3	582	589	1052	990	529
mDCs	4	511	354	538	427	277
ILC2	5	199	271	408	351	199
pDC	6	185	189	532	259	254
ILC3	7	228	267	414	340	111
iMOs	8	247	215	353	246	93
cDC	9	223	156	396	224	106
cDC	10	227	227	279	198	165
Neutrophil	11	243	237	253	169	144
ILC1	12	237	196	231	167	105
B cells	13	228	145	205	69	137
parenchymal cell	14	108	153	171	122	172
ILC2	15	83	81	99	91	66
Basophils	16	26	39	98	113	66
Granulocytes	17	29	26	43	20	9
endothelial cell	18	12	9	15	16	5
mast cell	19	4	3	17	8	5
	Total	6915	7991	11907	9950	5949

## Sheet: adt_markers_Naive_WT-0.2
	p_val	avg_log2FC	pct.1	pct.2	p_val_adj	cluster	gene
CD27-TotalSeq-B0191-anti-mouse-rat-human	0	1.27285	0.986	0.938	0	0.icl2	CD27-TotalSeq-B0191-anti-mouse-rat-human
CD11b-TotalSeq-B0014-anti-mouse-human	1.15048428945347e-247	-3.86477	0.843	0.95	2.18592014996159e-246	0.icl2	CD11b-TotalSeq-B0014-anti-mouse-human
CD11c-TotalSeq-B0106-anti-mouse	9.86211174738823e-197	-2.46569	0.786	0.923	1.87380123200376e-195	0.icl2	CD11c-TotalSeq-B0106-anti-mouse
MHCII-TotalSeq-B0117-anti-mouse	1.64657489834817e-158	-3.12757	0.998	0.999	3.12849230686152e-157	0.icl2	MHCII-TotalSeq-B0117-anti-mouse
CD103-TotalSeq-B0201-anti-mouse	3.6363074955792e-140	-0.129552	0.944	0.895	6.90898424160048e-139	0.icl2	CD103-TotalSeq-B0201-anti-mouse
CD169-TotalSeq-B0440-anti-mouse	3.58217638040416e-124	-2.16395	0.433	0.704	6.8061351227679e-123	0.icl2	CD169-TotalSeq-B0440-anti-mouse
CD8-TotalSeq-B0002-anti-mouse	7.05386910026742e-81	0.986524	0.993	0.991	1.34023512905081e-79	0.icl2	CD8-TotalSeq-B0002-anti-mouse
NKp46-TotalSeq-B0184-anti-mouse	5.08702489063934e-60	-2.37627	0.333	0.539	9.66534729221474e-59	0.icl2	NKp46-TotalSeq-B0184-anti-mouse
CD64-TotalSeq-B0202-anti-mouse	6.79125871812105e-56	0.37532	0.956	0.964	1.290339156443e-54	0.icl2	CD64-TotalSeq-B0202-anti-mouse
CD80-TotalSeq-B0849-anti-mouse	3.23805405041874e-45	-0.609974	0.984	0.994	6.1523026957956e-44	0.icl2	CD80-TotalSeq-B0849-anti-mouse
Ly6C-TotalSeq-B0013-anti-mouse	4.91122297508364e-44	-0.439733	0.999	0.999	9.33132365265892e-43	0.icl2	Ly6C-TotalSeq-B0013-anti-mouse
Rat-IgG2a---Isotype-Ctrl-B0238-anti-mouse	1.10407295143072e-40	0.346714	0.919	0.945	2.09773860771837e-39	0.icl2	Rat-IgG2a---Isotype-Ctrl-B0238-anti-mouse
CD4-TotalSeq-B0001-anti-mouse	9.45489903358138e-35	-1.53522	0.808	0.898	1.79643081638046e-33	0.icl2	CD4-TotalSeq-B0001-anti-mouse
SiglecH-TotalSeq-B0119-anti-mouse	1.30757984569801e-34	-0.111704	0.971	0.985	2.48440170682621e-33	0.icl2	SiglecH-TotalSeq-B0119-anti-mouse
NK1-1-TotalSeq-B0118-anti-mouse	1.71588633030678e-05	-1.31468	0.893	0.934	0.000326018	0.icl2	NK1-1-TotalSeq-B0118-anti-mouse
Ly6G-TotalSeq-B0015-anti-mouse	0.00011476	-4.42618	0.54	0.66	0.00218043	0.icl2	Ly6G-TotalSeq-B0015-anti-mouse
CD103-TotalSeq-B0201-anti-mouse.1	1.24074775418555e-293	3.55342	0.991	0.902	2.35742073295255e-292	1.ilc3	CD103-TotalSeq-B0201-anti-mouse
CD169-TotalSeq-B0440-anti-mouse.1	1.80876999393461e-95	1.97066	0.829	0.599	3.43666298847575e-94	1.ilc3	CD169-TotalSeq-B0440-anti-mouse
Ly6C-TotalSeq-B0013-anti-mouse.1	1.11631138638374e-42	-1.52837	1	0.999	2.12099163412911e-41	1.ilc3	Ly6C-TotalSeq-B0013-anti-mouse
CD27-TotalSeq-B0191-anti-mouse-rat-human.1	1.90422944447147e-34	-1.14362	0.917	0.957	3.6180359444958e-33	1.ilc3	CD27-TotalSeq-B0191-anti-mouse-rat-human
CD11c-TotalSeq-B0106-anti-mouse.1	2.18290834041765e-29	-2.13266	0.873	0.882	4.14752584679353e-28	1.ilc3	CD11c-TotalSeq-B0106-anti-mouse
CD86-TotalSeq-B0200-anti-mouse	3.90790640981315e-25	-1.09152	0.919	0.948	7.42502217864498e-24	1.ilc3	CD86-TotalSeq-B0200-anti-mouse
CD8-TotalSeq-B0002-anti-mouse.1	8.94875650942247e-24	-1.55237	0.986	0.993	1.70026373679027e-22	1.ilc3	CD8-TotalSeq-B0002-anti-mouse
NK1-1-TotalSeq-B0118-anti-mouse.1	4.50469538002093e-13	-1.26927	0.912	0.922	8.55892122203977e-12	1.ilc3	NK1-1-TotalSeq-B0118-anti-mouse
NKp46-TotalSeq-B0184-anti-mouse.1	4.07863901130155e-12	-2.01815	0.383	0.485	7.74941412147295e-11	1.ilc3	NKp46-TotalSeq-B0184-anti-mouse
CD4-TotalSeq-B0001-anti-mouse.1	2.35720370116353e-11	-1.83365	0.923	0.865	4.47868703221071e-10	1.ilc3	CD4-TotalSeq-B0001-anti-mouse
CD11b-TotalSeq-B0014-anti-mouse-human.1	9.0641085841974e-09	-1.80031	0.95	0.913	1.72218063099751e-07	1.ilc3	CD11b-TotalSeq-B0014-anti-mouse-human
MHCII-TotalSeq-B0117-anti-mouse.1	2.16166249218921e-06	-2.18356	1	0.998	4.10715873515949e-05	1.ilc3	MHCII-TotalSeq-B0117-anti-mouse
F4-80-TotalSeq-B0114-anti-mouse	7.36834219697713e-06	-0.304378	0.905	0.918	0.000139999	1.ilc3	F4-80-TotalSeq-B0114-anti-mouse
NKp46-TotalSeq-B0184-anti-mouse.2	0	3.71879	0.99	0.411	0	2.NK	NKp46-TotalSeq-B0184-anti-mouse
NK1-1-TotalSeq-B0118-anti-mouse.2	0	3.04618	0.997	0.912	0	2.NK	NK1-1-TotalSeq-B0118-anti-mouse
CD103-TotalSeq-B0201-anti-mouse.2	5.19289804645662e-128	-4.18236	0.798	0.924	9.86650628826757e-127	2.NK	CD103-TotalSeq-B0201-anti-mouse
CD11c-TotalSeq-B0106-anti-mouse.2	9.13324012905176e-112	0.626107	0.982	0.868	1.73531562451984e-110	2.NK	CD11c-TotalSeq-B0106-anti-mouse
CD80-TotalSeq-B0849-anti-mouse.1	9.55242398845578e-44	-0.650506	0.991	0.991	1.8149605578066e-42	2.NK	CD80-TotalSeq-B0849-anti-mouse
CD86-TotalSeq-B0200-anti-mouse.1	1.25238319343002e-42	-1.25546	0.92	0.949	2.37952806751705e-41	2.NK	CD86-TotalSeq-B0200-anti-mouse
MHCII-TotalSeq-B0117-anti-mouse.2	6.01697136625904e-33	-2.59695	0.996	0.999	1.14322455958922e-31	2.NK	MHCII-TotalSeq-B0117-anti-mouse
Ly6C-TotalSeq-B0013-anti-mouse.2	1.32705619547976e-21	-1.16519	0.997	0.999	2.52140677141154e-20	2.NK	Ly6C-TotalSeq-B0013-anti-mouse
CD8-TotalSeq-B0002-anti-mouse.2	3.13872802655373e-21	-1.71445	0.992	0.992	5.9635832504521e-20	2.NK	CD8-TotalSeq-B0002-anti-mouse
CD4-TotalSeq-B0001-anti-mouse.2	3.0298847684469e-20	-2.75647	0.821	0.876	5.75678106004911e-19	2.NK	CD4-TotalSeq-B0001-anti-mouse
F4-80-TotalSeq-B0114-anti-mouse.1	5.6661370309968e-12	-0.37888	0.911	0.917	1.07656603588939e-10	2.NK	F4-80-TotalSeq-B0114-anti-mouse
SiglecH-TotalSeq-B0119-anti-mouse.1	3.23527167745677e-09	-0.48254	0.983	0.98	6.14701618716787e-08	2.NK	SiglecH-TotalSeq-B0119-anti-mouse
CD27-TotalSeq-B0191-anti-mouse-rat-human.2	3.35388378150932e-09	-1.00963	0.94	0.954	6.37237918486772e-08	2.NK	CD27-TotalSeq-B0191-anti-mouse-rat-human
CD207-TotalSeq-B0437-anti-mouse-human-Langerin	1.04843474528554e-08	-0.363819	0.944	0.946	1.99202601604253e-07	2.NK	CD207-TotalSeq-B0437-anti-mouse-human-Langerin
Ly6G-TotalSeq-B0015-anti-mouse.1	4.46812448918634e-05	-4.49886	0.595	0.626	0.000848944	2.NK	Ly6G-TotalSeq-B0015-anti-mouse
CD64-TotalSeq-B0202-anti-mouse.1	0.000874929	-0.142312	0.964	0.961	0.0166236	2.NK	CD64-TotalSeq-B0202-anti-mouse
Rat-IgG2a---Isotype-Ctrl-B0238-anti-mouse.1	0.0014318	-0.147886	0.933	0.937	0.0272042	2.NK	Rat-IgG2a---Isotype-Ctrl-B0238-anti-mouse
Ly6C-TotalSeq-B0013-anti-mouse.3	2.23192760148941e-215	1.98469	1	0.999	4.24066244282989e-214	3.ilc2	Ly6C-TotalSeq-B0013-anti-mouse
CD27-TotalSeq-B0191-anti-mouse-rat-human.3	4.98562905078612e-100	1.05382	1	0.949	9.47269519649362e-99	3.ilc2	CD27-TotalSeq-B0191-anti-mouse-rat-human
CD103-TotalSeq-B0201-anti-mouse.3	1.21881793400123e-62	-3.43094	0.799	0.92	2.31575407460233e-61	3.ilc2	CD103-TotalSeq-B0201-anti-mouse
CD11b-TotalSeq-B0014-anti-mouse-human.2	7.29012731379155e-56	-3.56773	0.854	0.923	1.38512418962039e-54	3.ilc2	CD11b-TotalSeq-B0014-anti-mouse-human
CD86-TotalSeq-B0200-anti-mouse.2	1.26400709718363e-50	0.831192	0.971	0.943	2.4016134846489e-49	3.ilc2	CD86-TotalSeq-B0200-anti-mouse
CD80-TotalSeq-B0849-anti-mouse.2	1.32033060836468e-24	-0.617421	0.985	0.991	2.5086281558929e-23	3.ilc2	CD80-TotalSeq-B0849-anti-mouse
CD169-TotalSeq-B0440-anti-mouse.2	1.01384060461577e-23	-1.68256	0.46	0.635	1.92629714876997e-22	3.ilc2	CD169-TotalSeq-B0440-anti-mouse
CD4-TotalSeq-B0001-anti-mouse.3	1.88384364791065e-21	-3.0455	0.832	0.874	3.57930293103024e-20	3.ilc2	CD4-TotalSeq-B0001-anti-mouse
MHCII-TotalSeq-B0117-anti-mouse.3	1.30409955923856e-19	-2.318	1	0.998	2.47778916255326e-18	3.ilc2	MHCII-TotalSeq-B0117-anti-mouse
CD11c-TotalSeq-B0106-anti-mouse.3	2.12331677489475e-18	-1.59481	0.83	0.886	4.03430187230002e-17	3.ilc2	CD11c-TotalSeq-B0106-anti-mouse
NK1-1-TotalSeq-B0118-anti-mouse.3	2.00617171930922e-12	0.270298	0.919	0.921	3.81172626668751e-11	3.ilc2	NK1-1-TotalSeq-B0118-anti-mouse
CD8-TotalSeq-B0002-anti-mouse.3	4.1025015944432e-11	0.255863	0.995	0.992	7.79475302944208e-10	3.ilc2	CD8-TotalSeq-B0002-anti-mouse
NKp46-TotalSeq-B0184-anti-mouse.3	0.00027068	-0.825193	0.397	0.483	0.00514291	3.ilc2	NKp46-TotalSeq-B0184-anti-mouse
SiglecH-TotalSeq-B0119-anti-mouse.2	0.0071797	-0.197325	0.976	0.981	0.136414	3.ilc2	SiglecH-TotalSeq-B0119-anti-mouse
MHCII-TotalSeq-B0117-anti-mouse.4	4.53623431746335e-271	3.79018	1	0.998	8.61884520318037e-270	4.mDC	MHCII-TotalSeq-B0117-anti-mouse
Ly6C-TotalSeq-B0013-anti-mouse.4	2.62759886548692e-131	-1.93419	1	0.999	4.99243784442514e-130	4.mDC	Ly6C-TotalSeq-B0013-anti-mouse
CD11c-TotalSeq-B0106-anti-mouse.4	7.53863437833724e-122	1.15584	0.988	0.872	1.43234053188408e-120	4.mDC	CD11c-TotalSeq-B0106-anti-mouse
CD86-TotalSeq-B0200-anti-mouse.3	1.90804615005838e-98	1.39407	0.99	0.942	3.62528768511092e-97	4.mDC	CD86-TotalSeq-B0200-anti-mouse
CD27-TotalSeq-B0191-anti-mouse-rat-human.4	6.19913317206339e-93	-2.42235	0.932	0.955	1.17783530269204e-91	4.mDC	CD27-TotalSeq-B0191-anti-mouse-rat-human
CD80-TotalSeq-B0849-anti-mouse.3	2.3090756546944e-71	1.18693	1	0.99	4.38724374391936e-70	4.mDC	CD80-TotalSeq-B0849-anti-mouse
CD103-TotalSeq-B0201-anti-mouse.4	9.48601452978144e-42	-3.24131	0.914	0.91	1.80234276065847e-40	4.mDC	CD103-TotalSeq-B0201-anti-mouse
NK1-1-TotalSeq-B0118-anti-mouse.4	1.1735307457358e-26	-1.54099	0.969	0.917	2.22970841689801e-25	4.mDC	NK1-1-TotalSeq-B0118-anti-mouse
CD11b-TotalSeq-B0014-anti-mouse-human.3	1.03778415650238e-17	-0.955061	0.977	0.912	1.97178989735451e-16	4.mDC	CD11b-TotalSeq-B0014-anti-mouse-human
CD8-TotalSeq-B0002-anti-mouse.4	9.32327718501698e-15	-0.753691	1	0.991	1.77142266515323e-13	4.mDC	CD8-TotalSeq-B0002-anti-mouse
CD64-TotalSeq-B0202-anti-mouse.2	3.21166409863866e-14	-0.385319	0.957	0.962	6.10216178741346e-13	4.mDC	CD64-TotalSeq-B0202-anti-mouse
SiglecH-TotalSeq-B0119-anti-mouse.3	3.34622168203714e-14	-0.541241	0.99	0.98	6.35782119587057e-13	4.mDC	SiglecH-TotalSeq-B0119-anti-mouse
Rat-IgG2a---Isotype-Ctrl-B0238-anti-mouse.2	1.65067958786551e-07	-0.306659	0.955	0.935	3.13629121694447e-06	4.mDC	Rat-IgG2a---Isotype-Ctrl-B0238-anti-mouse
CD4-TotalSeq-B0001-anti-mouse.4	7.69869341047531e-06	-0.977384	0.932	0.865	0.000146275	4.mDC	CD4-TotalSeq-B0001-anti-mouse
F4-80-TotalSeq-B0114-anti-mouse.2	1.77943745553321e-05	0.122435	0.975	0.912	0.000338093	4.mDC	F4-80-TotalSeq-B0114-anti-mouse
CD207-TotalSeq-B0437-anti-mouse-human-Langerin.1	0.00631667	1.02994	0.978	0.944	0.120017	4.mDC	CD207-TotalSeq-B0437-anti-mouse-human-Langerin
CD27-TotalSeq-B0191-anti-mouse-rat-human.5	2.35825196609564e-46	1.24477	1	0.951	4.48067873558172e-45	5.ilc2	CD27-TotalSeq-B0191-anti-mouse-rat-human
CD86-TotalSeq-B0200-anti-mouse.4	8.24219621581282e-21	1.18118	0.995	0.944	1.56601728100444e-19	5.ilc2	CD86-TotalSeq-B0200-anti-mouse
CD11b-TotalSeq-B0014-anti-mouse-human.4	7.96488058292986e-15	-3.49652	0.884	0.918	1.51332731075667e-13	5.ilc2	CD11b-TotalSeq-B0014-anti-mouse-human
CD169-TotalSeq-B0440-anti-mouse.3	5.88151926031503e-09	-1.47479	0.452	0.626	1.11748865945986e-07	5.ilc2	CD169-TotalSeq-B0440-anti-mouse
CD11c-TotalSeq-B0106-anti-mouse.5	4.5366393795424e-08	-1.81291	0.859	0.882	8.61961482113055e-07	5.ilc2	CD11c-TotalSeq-B0106-anti-mouse
Ly6C-TotalSeq-B0013-anti-mouse.5	6.47403714977659e-06	0.277054	1	0.999	0.000123007	5.ilc2	Ly6C-TotalSeq-B0013-anti-mouse
Rat-IgG2a---Isotype-Ctrl-B0238-anti-mouse.3	3.33274541227937e-05	0.291472	0.97	0.936	0.000633222	5.ilc2	Rat-IgG2a---Isotype-Ctrl-B0238-anti-mouse
NKp46-TotalSeq-B0184-anti-mouse.4	5.72941675231915e-05	-1.97338	0.352	0.479	0.00108859	5.ilc2	NKp46-TotalSeq-B0184-anti-mouse
MHCII-TotalSeq-B0117-anti-mouse.5	0.00010063	-2.63864	1	0.998	0.00191197	5.ilc2	MHCII-TotalSeq-B0117-anti-mouse
CD64-TotalSeq-B0202-anti-mouse.3	0.00258453	0.16836	0.965	0.962	0.049106	5.ilc2	CD64-TotalSeq-B0202-anti-mouse
SiglecH-TotalSeq-B0119-anti-mouse.4	1.75118456293216e-117	3.06974	1	0.98	3.32725066957111e-116	6.pDC	SiglecH-TotalSeq-B0119-anti-mouse
CD4-TotalSeq-B0001-anti-mouse.5	9.66733287649436e-79	2.57008	1	0.866	1.83679324653393e-77	6.pDC	CD4-TotalSeq-B0001-anti-mouse
CD11c-TotalSeq-B0106-anti-mouse.6	8.1381255482919e-60	1.43915	1	0.878	1.54624385417546e-58	6.pDC	CD11c-TotalSeq-B0106-anti-mouse
CD27-TotalSeq-B0191-anti-mouse-rat-human.6	2.51661073680853e-41	-2.6601	0.881	0.955	4.7815603999362e-40	6.pDC	CD27-TotalSeq-B0191-anti-mouse-rat-human
Ly6C-TotalSeq-B0013-anti-mouse.6	3.55369946019413e-39	1.34649	1	0.999	6.75202897436884e-38	6.pDC	Ly6C-TotalSeq-B0013-anti-mouse
CD80-TotalSeq-B0849-anti-mouse.4	2.38904189009159e-23	-0.726342	0.995	0.99	4.53917959117402e-22	6.pDC	CD80-TotalSeq-B0849-anti-mouse
CD8-TotalSeq-B0002-anti-mouse.5	1.30497187522044e-22	0.81664	0.995	0.992	2.47944656291883e-21	6.pDC	CD8-TotalSeq-B0002-anti-mouse
NK1-1-TotalSeq-B0118-anti-mouse.5	2.73008608653115e-19	-1.61684	0.897	0.922	5.18716356440918e-18	6.pDC	NK1-1-TotalSeq-B0118-anti-mouse
Rat-IgG2a---Isotype-Ctrl-B0238-anti-mouse.4	5.26335096161707e-17	-0.72995	0.924	0.937	1.00003668270724e-15	6.pDC	Rat-IgG2a---Isotype-Ctrl-B0238-anti-mouse
CD86-TotalSeq-B0200-anti-mouse.5	8.4574639730638e-17	-1.43951	0.914	0.946	1.60691815488212e-15	6.pDC	CD86-TotalSeq-B0200-anti-mouse
CD64-TotalSeq-B0202-anti-mouse.4	9.01576632819449e-17	-0.65867	0.941	0.962	1.71299560235695e-15	6.pDC	CD64-TotalSeq-B0202-anti-mouse
CD103-TotalSeq-B0201-anti-mouse.5	1.15999605157771e-16	-2.83893	0.924	0.91	2.20399249799764e-15	6.pDC	CD103-TotalSeq-B0201-anti-mouse
CD207-TotalSeq-B0437-anti-mouse-human-Langerin.2	4.66557633444256e-16	-0.750026	0.93	0.947	8.86459503544086e-15	6.pDC	CD207-TotalSeq-B0437-anti-mouse-human-Langerin
F4-80-TotalSeq-B0114-anti-mouse.3	7.98837234758075e-14	-0.708926	0.908	0.917	1.51779074604034e-12	6.pDC	F4-80-TotalSeq-B0114-anti-mouse
CD11b-TotalSeq-B0014-anti-mouse-human.5	1.7913250929024e-11	-2.49788	0.957	0.916	3.40351767651455e-10	6.pDC	CD11b-TotalSeq-B0014-anti-mouse-human
CD169-TotalSeq-B0440-anti-mouse.4	1.80310572472318e-07	-1.23045	0.605	0.621	3.42590087697405e-06	6.pDC	CD169-TotalSeq-B0440-anti-mouse
NKp46-TotalSeq-B0184-anti-mouse.5	0.000236171	-1.81758	0.427	0.477	0.00448725	6.pDC	NKp46-TotalSeq-B0184-anti-mouse
Ly6G-TotalSeq-B0015-anti-mouse.2	0.00541048	-4.50182	0.665	0.622	0.102799	6.pDC	Ly6G-TotalSeq-B0015-anti-mouse
CD169-TotalSeq-B0440-anti-mouse.5	1.92622343708543e-30	1.23086	0.842	0.613	3.65982453046232e-29	7.ilc3	CD169-TotalSeq-B0440-anti-mouse
CD27-TotalSeq-B0191-anti-mouse-rat-human.7	8.43876494747784e-24	0.768245	0.996	0.951	1.60336534002079e-22	7.ilc3	CD27-TotalSeq-B0191-anti-mouse-rat-human
CD8-TotalSeq-B0002-anti-mouse.6	1.71080305385307e-18	-2.22222	0.978	0.993	3.25052580232083e-17	7.ilc3	CD8-TotalSeq-B0002-anti-mouse
CD86-TotalSeq-B0200-anti-mouse.6	2.83551144002207e-12	-1.06915	0.895	0.947	5.38747173604194e-11	7.ilc3	CD86-TotalSeq-B0200-anti-mouse
CD11c-TotalSeq-B0106-anti-mouse.7	6.16892642656933e-11	-2.06959	0.855	0.882	1.17209602104817e-09	7.ilc3	CD11c-TotalSeq-B0106-anti-mouse
CD103-TotalSeq-B0201-anti-mouse.6	1.95102691119549e-08	0.998168	0.939	0.909	3.70695113127144e-07	7.ilc3	CD103-TotalSeq-B0201-anti-mouse
NKp46-TotalSeq-B0184-anti-mouse.6	1.13242946858567e-06	-1.84818	0.342	0.48	2.15161599031278e-05	7.ilc3	NKp46-TotalSeq-B0184-anti-mouse
Ly6C-TotalSeq-B0013-anti-mouse.7	6.55067810660936e-05	-1.11513	0.996	0.999	0.00124463	7.ilc3	Ly6C-TotalSeq-B0013-anti-mouse
CD4-TotalSeq-B0001-anti-mouse.6	0.0079872	-1.30543	0.925	0.868	0.151757	7.ilc3	CD4-TotalSeq-B0001-anti-mouse
CD11b-TotalSeq-B0014-anti-mouse-human.6	5.29558608875206e-128	2.92585	0.996	0.914	1.00616135686289e-126	8.iMOS	CD11b-TotalSeq-B0014-anti-mouse-human
F4-80-TotalSeq-B0114-anti-mouse.4	1.63586409583042e-69	1.58617	0.992	0.914	3.10814178207779e-68	8.iMOS	F4-80-TotalSeq-B0114-anti-mouse
CD27-TotalSeq-B0191-anti-mouse-rat-human.8	1.59304004172927e-58	-2.86014	0.915	0.954	3.02677607928562e-57	8.iMOS	CD27-TotalSeq-B0191-anti-mouse-rat-human
CD80-TotalSeq-B0849-anti-mouse.5	5.40872202963666e-46	0.782386	0.996	0.99	1.02765718563096e-44	8.iMOS	CD80-TotalSeq-B0849-anti-mouse
CD8-TotalSeq-B0002-anti-mouse.7	1.07960470724898e-37	-2.24534	0.98	0.993	2.05124894377307e-36	8.iMOS	CD8-TotalSeq-B0002-anti-mouse
Ly6C-TotalSeq-B0013-anti-mouse.8	1.89712104426314e-31	1.96255	0.996	0.999	3.60452998409997e-30	8.iMOS	Ly6C-TotalSeq-B0013-anti-mouse
SiglecH-TotalSeq-B0119-anti-mouse.5	1.38524557223491e-15	-0.74969	0.984	0.98	2.63196658724632e-14	8.iMOS	SiglecH-TotalSeq-B0119-anti-mouse
CD103-TotalSeq-B0201-anti-mouse.7	2.10411951932379e-15	-3.1372	0.927	0.91	3.99782708671519e-14	8.iMOS	CD103-TotalSeq-B0201-anti-mouse
NK1-1-TotalSeq-B0118-anti-mouse.6	4.55348263195377e-15	-1.31033	0.935	0.921	8.65161700071216e-14	8.iMOS	NK1-1-TotalSeq-B0118-anti-mouse
CD169-TotalSeq-B0440-anti-mouse.6	3.96089612706759e-13	0.465256	0.854	0.612	7.52570264142843e-12	8.iMOS	CD169-TotalSeq-B0440-anti-mouse
Rat-IgG2a---Isotype-Ctrl-B0238-anti-mouse.5	1.10672591851946e-06	-0.328699	0.968	0.936	2.10277924518698e-05	8.iMOS	Rat-IgG2a---Isotype-Ctrl-B0238-anti-mouse
CD64-TotalSeq-B0202-anti-mouse.5	1.42200272702516e-06	0.3106	0.984	0.961	2.7018051813478e-05	8.iMOS	CD64-TotalSeq-B0202-anti-mouse
CD11c-TotalSeq-B0106-anti-mouse.8	1.80850530561665e-06	0.413637	0.972	0.878	3.43616008067163e-05	8.iMOS	CD11c-TotalSeq-B0106-anti-mouse
MHCII-TotalSeq-B0117-anti-mouse.6	2.75399177927861e-05	-0.209553	0.996	0.998	0.000523258	8.iMOS	MHCII-TotalSeq-B0117-anti-mouse
CD4-TotalSeq-B0001-anti-mouse.7	0.00204019	-1.4205	0.899	0.869	0.0387637	8.iMOS	CD4-TotalSeq-B0001-anti-mouse
CD11c-TotalSeq-B0106-anti-mouse.9	5.12325496380881e-105	3.09065	0.996	0.877	9.73418443123674e-104	9.cDC	CD11c-TotalSeq-B0106-anti-mouse
MHCII-TotalSeq-B0117-anti-mouse.7	2.62659637026115e-53	1.06591	1	0.998	4.99053310349618e-52	9.cDC	MHCII-TotalSeq-B0117-anti-mouse
Ly6C-TotalSeq-B0013-anti-mouse.9	2.99110410494878e-53	-0.598791	1	0.999	5.68309779940269e-52	9.cDC	Ly6C-TotalSeq-B0013-anti-mouse
CD27-TotalSeq-B0191-anti-mouse-rat-human.9	3.82459322753062e-47	-2.41536	0.857	0.956	7.26672713230818e-46	9.cDC	CD27-TotalSeq-B0191-anti-mouse-rat-human
CD80-TotalSeq-B0849-anti-mouse.6	1.403269682791e-26	0.523492	1	0.99	2.6662123973029e-25	9.cDC	CD80-TotalSeq-B0849-anti-mouse
SiglecH-TotalSeq-B0119-anti-mouse.6	9.94400239305691e-24	-0.481358	0.978	0.981	1.88936045468081e-22	9.cDC	SiglecH-TotalSeq-B0119-anti-mouse
CD64-TotalSeq-B0202-anti-mouse.6	1.32935439751161e-20	-0.67751	0.964	0.962	2.52577335527207e-19	9.cDC	CD64-TotalSeq-B0202-anti-mouse
NK1-1-TotalSeq-B0118-anti-mouse.7	2.16893054194749e-19	-1.02177	0.892	0.922	4.12096802970022e-18	9.cDC	NK1-1-TotalSeq-B0118-anti-mouse
CD8-TotalSeq-B0002-anti-mouse.8	5.67373960392686e-19	1.28803	0.996	0.992	1.0780105247461e-17	9.cDC	CD8-TotalSeq-B0002-anti-mouse
Rat-IgG2a---Isotype-Ctrl-B0238-anti-mouse.6	6.47080147233589e-17	-0.6589	0.973	0.936	1.22945227974382e-15	9.cDC	Rat-IgG2a---Isotype-Ctrl-B0238-anti-mouse
CD4-TotalSeq-B0001-anti-mouse.8	3.14194721654796e-13	-0.962656	0.978	0.866	5.96969971144113e-12	9.cDC	CD4-TotalSeq-B0001-anti-mouse
CD169-TotalSeq-B0440-anti-mouse.7	4.6472436579109e-11	0.485257	0.83	0.614	8.82976295003071e-10	9.cDC	CD169-TotalSeq-B0440-anti-mouse
Ly6G-TotalSeq-B0015-anti-mouse.3	0.000254916	-2.80494	0.682	0.621	0.0048434	9.cDC	Ly6G-TotalSeq-B0015-anti-mouse
CD11c-TotalSeq-B0106-anti-mouse.10	1.73032033853641e-77	2.33802	0.969	0.878	3.28760864321918e-76	10.cDC	CD11c-TotalSeq-B0106-anti-mouse
CD8-TotalSeq-B0002-anti-mouse.9	1.55348876720982e-62	1.70528	0.996	0.992	2.95162865769866e-61	10.cDC	CD8-TotalSeq-B0002-anti-mouse
CD27-TotalSeq-B0191-anti-mouse-rat-human.10	6.50768238970402e-47	-2.31287	0.903	0.955	1.23645965404376e-45	10.cDC	CD27-TotalSeq-B0191-anti-mouse-rat-human
MHCII-TotalSeq-B0117-anti-mouse.8	1.54805540637066e-46	0.81762	1	0.998	2.94130527210426e-45	10.cDC	MHCII-TotalSeq-B0117-anti-mouse
Ly6C-TotalSeq-B0013-anti-mouse.10	3.32113511376849e-44	-1.6246	1	0.999	6.31015671616013e-43	10.cDC	Ly6C-TotalSeq-B0013-anti-mouse
NK1-1-TotalSeq-B0118-anti-mouse.8	5.62795131706958e-20	-1.69011	0.894	0.922	1.06931075024322e-18	10.cDC	NK1-1-TotalSeq-B0118-anti-mouse
CD64-TotalSeq-B0202-anti-mouse.7	1.23226312058179e-11	-0.473322	0.952	0.962	2.3412999291054e-10	10.cDC	CD64-TotalSeq-B0202-anti-mouse
NKp46-TotalSeq-B0184-anti-mouse.7	2.21579438512343e-09	-2.51845	0.357	0.48	4.21000933173451e-08	10.cDC	NKp46-TotalSeq-B0184-anti-mouse
SiglecH-TotalSeq-B0119-anti-mouse.7	9.53588534606197e-09	-0.386128	0.991	0.98	1.81181821575177e-07	10.cDC	SiglecH-TotalSeq-B0119-anti-mouse
CD103-TotalSeq-B0201-anti-mouse.8	9.31097232518742e-08	-1.38753	0.974	0.908	1.76908474178561e-06	10.cDC	CD103-TotalSeq-B0201-anti-mouse
CD80-TotalSeq-B0849-anti-mouse.7	1.80924575671805e-07	0.107155	1	0.99	3.43756693776429e-06	10.cDC	CD80-TotalSeq-B0849-anti-mouse
Rat-IgG2a---Isotype-Ctrl-B0238-anti-mouse.7	5.27433451944815e-06	-0.315542	0.938	0.937	0.000100212	10.cDC	Rat-IgG2a---Isotype-Ctrl-B0238-anti-mouse
F4-80-TotalSeq-B0114-anti-mouse.5	4.49479145383104e-05	-0.25252	0.903	0.917	0.00085401	10.cDC	F4-80-TotalSeq-B0114-anti-mouse
CD86-TotalSeq-B0200-anti-mouse.7	0.00130412	-0.862241	0.969	0.945	0.0247783	10.cDC	CD86-TotalSeq-B0200-anti-mouse
Ly6G-TotalSeq-B0015-anti-mouse.4	6.51288658077102e-161	7.67724	0.996	0.609	1.23744845034649e-159	11.Neutro	Ly6G-TotalSeq-B0015-anti-mouse
CD11b-TotalSeq-B0014-anti-mouse-human.7	1.1811643966834e-144	4.47566	0.996	0.914	2.24421235369846e-143	11.Neutro	CD11b-TotalSeq-B0014-anti-mouse-human
CD27-TotalSeq-B0191-anti-mouse-rat-human.11	3.31393778016825e-57	-2.97126	0.909	0.954	6.29648178231967e-56	11.Neutro	CD27-TotalSeq-B0191-anti-mouse-rat-human
CD8-TotalSeq-B0002-anti-mouse.10	4.05873723966143e-52	-2.29862	0.975	0.993	7.71160075535672e-51	11.Neutro	CD8-TotalSeq-B0002-anti-mouse
NK1-1-TotalSeq-B0118-anti-mouse.9	1.76479236651e-32	-1.88855	0.897	0.922	3.353105496369e-31	11.Neutro	NK1-1-TotalSeq-B0118-anti-mouse
CD103-TotalSeq-B0201-anti-mouse.9	1.39279517635028e-26	-2.95962	0.86	0.912	2.64631083506553e-25	11.Neutro	CD103-TotalSeq-B0201-anti-mouse
SiglecH-TotalSeq-B0119-anti-mouse.8	5.62624259046414e-24	-0.88041	0.984	0.98	1.06898609218819e-22	11.Neutro	SiglecH-TotalSeq-B0119-anti-mouse
MHCII-TotalSeq-B0117-anti-mouse.9	8.57096585541502e-22	-1.97711	0.996	0.998	1.62848351252885e-20	11.Neutro	MHCII-TotalSeq-B0117-anti-mouse
CD64-TotalSeq-B0202-anti-mouse.8	2.27065867354124e-17	-0.599519	0.979	0.961	4.31425147972835e-16	11.Neutro	CD64-TotalSeq-B0202-anti-mouse
Rat-IgG2a---Isotype-Ctrl-B0238-anti-mouse.8	2.36830164545022e-13	-0.574276	0.942	0.937	4.49977312635543e-12	11.Neutro	Rat-IgG2a---Isotype-Ctrl-B0238-anti-mouse
CD169-TotalSeq-B0440-anti-mouse.8	2.31708956870007e-12	0.359947	0.852	0.612	4.40247018053013e-11	11.Neutro	CD169-TotalSeq-B0440-anti-mouse
CD86-TotalSeq-B0200-anti-mouse.8	2.84327596913427e-12	-1.29905	0.951	0.945	5.40222434135511e-11	11.Neutro	CD86-TotalSeq-B0200-anti-mouse
CD4-TotalSeq-B0001-anti-mouse.9	2.96744159602976e-10	-2.09305	0.881	0.87	5.63813903245653e-09	11.Neutro	CD4-TotalSeq-B0001-anti-mouse
NKp46-TotalSeq-B0184-anti-mouse.8	2.19132876928492e-06	-2.28788	0.432	0.477	4.16352466164135e-05	11.Neutro	NKp46-TotalSeq-B0184-anti-mouse
CD207-TotalSeq-B0437-anti-mouse-human-Langerin.3	5.8199376248311e-06	-0.462005	0.963	0.946	0.000110579	11.Neutro	CD207-TotalSeq-B0437-anti-mouse-human-Langerin
CD11c-TotalSeq-B0106-anti-mouse.11	0.00684284	-1.45987	0.914	0.88	0.130014	11.Neutro	CD11c-TotalSeq-B0106-anti-mouse
CD4-TotalSeq-B0001-anti-mouse.10	1.93472608777399e-125	4.6867	1	0.865	3.67597956677058e-124	12.ilc1	CD4-TotalSeq-B0001-anti-mouse
CD169-TotalSeq-B0440-anti-mouse.9	9.13363356874797e-61	1.95292	0.941	0.609	1.73539037806211e-59	12.ilc1	CD169-TotalSeq-B0440-anti-mouse
Ly6C-TotalSeq-B0013-anti-mouse.11	1.20090866654029e-53	-1.8025	0.996	0.999	2.28172646642655e-52	12.ilc1	Ly6C-TotalSeq-B0013-anti-mouse
CD27-TotalSeq-B0191-anti-mouse-rat-human.12	1.05705680803277e-29	-1.87271	0.949	0.953	2.00840793526227e-28	12.ilc1	CD27-TotalSeq-B0191-anti-mouse-rat-human
CD103-TotalSeq-B0201-anti-mouse.10	2.62557021093222e-20	-2.48469	0.924	0.91	4.98858340077121e-19	12.ilc1	CD103-TotalSeq-B0201-anti-mouse
NKp46-TotalSeq-B0184-anti-mouse.9	4.72965343935909e-20	1.80076	0.705	0.468	8.98634153478228e-19	12.ilc1	NKp46-TotalSeq-B0184-anti-mouse
SiglecH-TotalSeq-B0119-anti-mouse.9	5.92858793028042e-19	-0.805916	0.983	0.98	1.12643170675328e-17	12.ilc1	SiglecH-TotalSeq-B0119-anti-mouse
CD11b-TotalSeq-B0014-anti-mouse-human.8	5.74970670595032e-15	-1.23557	0.987	0.914	1.09244427413056e-13	12.ilc1	CD11b-TotalSeq-B0014-anti-mouse-human
Rat-IgG2a---Isotype-Ctrl-B0238-anti-mouse.9	2.43778705195949e-14	-0.543697	0.962	0.936	4.63179539872302e-13	12.ilc1	Rat-IgG2a---Isotype-Ctrl-B0238-anti-mouse
CD64-TotalSeq-B0202-anti-mouse.9	8.58580377382214e-14	-0.524957	0.962	0.962	1.63130271702621e-12	12.ilc1	CD64-TotalSeq-B0202-anti-mouse
F4-80-TotalSeq-B0114-anti-mouse.6	7.00884252103938e-11	-0.355624	0.962	0.915	1.33168007899748e-09	12.ilc1	F4-80-TotalSeq-B0114-anti-mouse
CD207-TotalSeq-B0437-anti-mouse-human-Langerin.4	3.77140987483442e-10	-0.540006	0.979	0.945	7.1656787621854e-09	12.ilc1	CD207-TotalSeq-B0437-anti-mouse-human-Langerin
CD8-TotalSeq-B0002-anti-mouse.11	2.0783524409739e-09	-1.55364	0.996	0.992	3.94886963785042e-08	12.ilc1	CD8-TotalSeq-B0002-anti-mouse
NK1-1-TotalSeq-B0118-anti-mouse.10	2.57215285625206e-08	0.311435	0.975	0.919	4.88709042687892e-07	12.ilc1	NK1-1-TotalSeq-B0118-anti-mouse
CD80-TotalSeq-B0849-anti-mouse.8	0.000521039	0.157496	0.996	0.99	0.00989974	12.ilc1	CD80-TotalSeq-B0849-anti-mouse
MHCII-TotalSeq-B0117-anti-mouse.10	5.32146697994909e-85	1.81421	1	0.998	1.01107872619033e-83	13.B-cell	MHCII-TotalSeq-B0117-anti-mouse
CD80-TotalSeq-B0849-anti-mouse.9	8.36601405010667e-83	1.5227	1	0.99	1.58954266952027e-81	13.B-cell	CD80-TotalSeq-B0849-anti-mouse
CD27-TotalSeq-B0191-anti-mouse-rat-human.13	5.52454188976741e-33	-2.33386	0.899	0.955	1.04966295905581e-31	13.B-cell	CD27-TotalSeq-B0191-anti-mouse-rat-human
CD207-TotalSeq-B0437-anti-mouse-human-Langerin.5	3.42811772521031e-26	0.635055	0.987	0.945	6.5134236778996e-25	13.B-cell	CD207-TotalSeq-B0437-anti-mouse-human-Langerin
Rat-IgG2a---Isotype-Ctrl-B0238-anti-mouse.10	1.1758403156485e-11	0.465289	0.969	0.936	2.23409659973215e-10	13.B-cell	Rat-IgG2a---Isotype-Ctrl-B0238-anti-mouse
Ly6C-TotalSeq-B0013-anti-mouse.12	5.68834724089668e-09	-1.28062	1	0.999	1.08078597577037e-07	13.B-cell	Ly6C-TotalSeq-B0013-anti-mouse
CD103-TotalSeq-B0201-anti-mouse.11	9.51271900241099e-09	-2.5282	0.912	0.91	1.80741661045809e-07	13.B-cell	CD103-TotalSeq-B0201-anti-mouse
CD11c-TotalSeq-B0106-anti-mouse.12	1.00682694323391e-07	-1.53962	0.899	0.88	1.91297119214443e-06	13.B-cell	CD11c-TotalSeq-B0106-anti-mouse
F4-80-TotalSeq-B0114-anti-mouse.7	7.07847213390045e-06	0.240058	0.956	0.915	0.000134491	13.B-cell	F4-80-TotalSeq-B0114-anti-mouse
Ly6G-TotalSeq-B0015-anti-mouse.5	7.54622634400584e-06	-3.26873	0.719	0.62	0.000143378	13.B-cell	Ly6G-TotalSeq-B0015-anti-mouse
CD8-TotalSeq-B0002-anti-mouse.12	3.94941959475952e-05	-1.36544	0.991	0.992	0.00075039	13.B-cell	CD8-TotalSeq-B0002-anti-mouse
CD64-TotalSeq-B0202-anti-mouse.10	0.000962922	0.22255	0.987	0.961	0.0182955	13.B-cell	CD64-TotalSeq-B0202-anti-mouse
CD11b-TotalSeq-B0014-anti-mouse-human.9	0.00408855	-2.34629	0.93	0.916	0.0776824	13.B-cell	CD11b-TotalSeq-B0014-anti-mouse-human
NKp46-TotalSeq-B0184-anti-mouse.10	0.00511731	-1.52729	0.421	0.477	0.0972289	13.B-cell	NKp46-TotalSeq-B0184-anti-mouse
Ly6C-TotalSeq-B0013-anti-mouse.13	4.4790236455368e-12	0.945877	1	0.999	8.51014492651991e-11	14.parenchymal	Ly6C-TotalSeq-B0013-anti-mouse
CD11b-TotalSeq-B0014-anti-mouse-human.10	1.38738550903947e-08	-3.25417	0.88	0.917	2.63603246717499e-07	14.parenchymal	CD11b-TotalSeq-B0014-anti-mouse-human
MHCII-TotalSeq-B0117-anti-mouse.11	1.35483041300241e-05	-2.60202	1	0.998	0.000257418	14.parenchymal	MHCII-TotalSeq-B0117-anti-mouse
Rat-IgG2a---Isotype-Ctrl-B0238-anti-mouse.11	1.77545841350628e-05	0.492441	0.963	0.936	0.000337337	14.parenchymal	Rat-IgG2a---Isotype-Ctrl-B0238-anti-mouse
CD4-TotalSeq-B0001-anti-mouse.11	6.43972348986044e-05	-1.7438	0.815	0.871	0.00122355	14.parenchymal	CD4-TotalSeq-B0001-anti-mouse
CD64-TotalSeq-B0202-anti-mouse.11	0.000853995	0.308721	0.981	0.961	0.0162259	14.parenchymal	CD64-TotalSeq-B0202-anti-mouse
CD4-TotalSeq-B0001-anti-mouse.12	7.03560538636288e-21	2.09251	0.976	0.869	1.33676502340895e-19	15.ilc2	CD4-TotalSeq-B0001-anti-mouse
CD27-TotalSeq-B0191-anti-mouse-rat-human.14	7.15348399717748e-12	0.924243	0.988	0.952	1.35916195946372e-10	15.ilc2	CD27-TotalSeq-B0191-anti-mouse-rat-human
CD86-TotalSeq-B0200-anti-mouse.9	2.29477990944719e-10	1.31956	1	0.945	4.36008182794966e-09	15.ilc2	CD86-TotalSeq-B0200-anti-mouse
CD11b-TotalSeq-B0014-anti-mouse-human.11	4.14601292128152e-09	-3.54848	0.843	0.918	7.87742455043489e-08	15.ilc2	CD11b-TotalSeq-B0014-anti-mouse-human
CD11c-TotalSeq-B0106-anti-mouse.13	1.13094262758158e-07	-2.34827	0.867	0.881	2.148790992405e-06	15.ilc2	CD11c-TotalSeq-B0106-anti-mouse
NKp46-TotalSeq-B0184-anti-mouse.11	6.41331879963627e-05	-2.38163	0.289	0.478	0.00121853	15.ilc2	NKp46-TotalSeq-B0184-anti-mouse
CD169-TotalSeq-B0440-anti-mouse.10	0.00063376	-1.13892	0.482	0.622	0.0120414	15.ilc2	CD169-TotalSeq-B0440-anti-mouse
CD8-TotalSeq-B0002-anti-mouse.13	0.00187438	-1.4017	0.988	0.992	0.0356132	15.ilc2	CD8-TotalSeq-B0002-anti-mouse
CD11b-TotalSeq-B0014-anti-mouse-human.12	1.1339198619556e-07	0.832172	1	0.917	2.15444773771565e-06	16.Baso	CD11b-TotalSeq-B0014-anti-mouse-human
CD86-TotalSeq-B0200-anti-mouse.10	3.08483762063473e-07	0.861502	1	0.945	5.86119147920598e-06	16.Baso	CD86-TotalSeq-B0200-anti-mouse
CD27-TotalSeq-B0191-anti-mouse-rat-human.15	0.000580595	-1.7028	0.923	0.953	0.0110313	16.Baso	CD27-TotalSeq-B0191-anti-mouse-rat-human
CD8-TotalSeq-B0002-anti-mouse.14	0.00219934	-2.01774	1	0.992	0.0417875	16.Baso	CD8-TotalSeq-B0002-anti-mouse
CD11b-TotalSeq-B0014-anti-mouse-human.13	2.77852394072381e-16	2.50931	1	0.916	5.27919548737523e-15	17.granulocyte	CD11b-TotalSeq-B0014-anti-mouse-human
SiglecH-TotalSeq-B0119-anti-mouse.10	2.0369393148256e-14	1.6265	1	0.98	3.87018469816864e-13	17.granulocyte	SiglecH-TotalSeq-B0119-anti-mouse
CD27-TotalSeq-B0191-anti-mouse-rat-human.16	6.75865554315942e-13	-3.65721	1	0.953	1.28414455320029e-11	17.granulocyte	CD27-TotalSeq-B0191-anti-mouse-rat-human
CD4-TotalSeq-B0001-anti-mouse.13	2.60963012076021e-12	1.30932	1	0.869	4.9582972294444e-11	17.granulocyte	CD4-TotalSeq-B0001-anti-mouse
CD64-TotalSeq-B0202-anti-mouse.12	1.79338391601749e-09	-1.19769	0.966	0.962	3.40742944043323e-08	17.granulocyte	CD64-TotalSeq-B0202-anti-mouse
Rat-IgG2a---Isotype-Ctrl-B0238-anti-mouse.12	1.33011789970902e-08	-1.14151	0.931	0.937	2.52722400944714e-07	17.granulocyte	Rat-IgG2a---Isotype-Ctrl-B0238-anti-mouse
Ly6G-TotalSeq-B0015-anti-mouse.6	7.85006803062649e-08	2.62486	0.931	0.622	1.49151292581903e-06	17.granulocyte	Ly6G-TotalSeq-B0015-anti-mouse
CD11c-TotalSeq-B0106-anti-mouse.14	9.93084507318553e-08	0.404515	1	0.88	1.88686056390525e-06	17.granulocyte	CD11c-TotalSeq-B0106-anti-mouse
Ly6C-TotalSeq-B0013-anti-mouse.14	2.00007240623978e-07	0.842833	1	0.999	3.80013757185558e-06	17.granulocyte	Ly6C-TotalSeq-B0013-anti-mouse
NK1-1-TotalSeq-B0118-anti-mouse.11	1.30718032754773e-06	-1.85623	1	0.921	2.48364262234068e-05	17.granulocyte	NK1-1-TotalSeq-B0118-anti-mouse
CD86-TotalSeq-B0200-anti-mouse.11	6.84173754825847e-05	-1.85339	1	0.945	0.00129993	17.granulocyte	CD86-TotalSeq-B0200-anti-mouse
CD207-TotalSeq-B0437-anti-mouse-human-Langerin.6	0.000118914	-0.747194	0.966	0.946	0.00225936	17.granulocyte	CD207-TotalSeq-B0437-anti-mouse-human-Langerin
CD103-TotalSeq-B0201-anti-mouse.12	0.000162424	-3.92533	0.931	0.91	0.00308606	17.granulocyte	CD103-TotalSeq-B0201-anti-mouse
MHCII-TotalSeq-B0117-anti-mouse.12	0.000616902	-0.892895	1	0.998	0.0117211	17.granulocyte	MHCII-TotalSeq-B0117-anti-mouse
CD80-TotalSeq-B0849-anti-mouse.10	1.71729058059514e-05	0.991914	1	0.991	0.000326285	18.endothelial	CD80-TotalSeq-B0849-anti-mouse
CD207-TotalSeq-B0437-anti-mouse-human-Langerin.7	0.000442757	1.13771	1	0.946	0.00841239	18.endothelial	CD207-TotalSeq-B0437-anti-mouse-human-Langerin
CD27-TotalSeq-B0191-anti-mouse-rat-human.17	0.00732203	-2.46818	0.75	0.953	0.139118	19.mast	CD27-TotalSeq-B0191-anti-mouse-rat-human
CD4-TotalSeq-B0001-anti-mouse.14	0.0094804	-0.160377	1	0.87	0.180128	19.mast	CD4-TotalSeq-B0001-anti-mouse

## Sheet: rna_markers_Naive_WT-0.2
	p_val	avg_log2FC	pct.1	pct.2	p_val_adj	cluster	gene
Themis	0	3.04105	0.912	0.219	0	0.icl2	Themis
Lef1	0	2.17898	0.869	0.315	0	0.icl2	Lef1
Cd3d	0	1.68993	0.964	0.41	0	0.icl2	Cd3d
Cd3g	0	1.65636	0.981	0.433	0	0.icl2	Cd3g
Cd44	0	-5.0225	0.044	0.573	0	0.icl2	Cd44
Cd3e	0	1.76273	0.861	0.352	0	0.icl2	Cd3e
Ahnak	0	-3.14496	0.142	0.649	0	0.icl2	Ahnak
Bcl11b	0	1.85708	0.824	0.356	0	0.icl2	Bcl11b
Ms4a6b	0	1.79281	0.939	0.485	0	0.icl2	Ms4a6b
Lck	0	1.56056	0.84	0.411	0	0.icl2	Lck
Smc4	0	2.01627	0.873	0.47	0	0.icl2	Smc4
Rhoh	0	1.80935	0.81	0.423	0	0.icl2	Rhoh
Grap2	0	1.50578	0.899	0.526	0	0.icl2	Grap2
Skap1	0	1.29741	0.99	0.633	0	0.icl2	Skap1
Tmsb10	0	0.955916	0.996	0.899	0	0.icl2	Tmsb10
Ms4a4b	1.96511682780576e-313	1.20016	0.971	0.507	3.25226835001853e-309	0.icl2	Ms4a4b
Prkcq	2.11696487721375e-304	1.54456	0.846	0.46	3.50357687178876e-300	0.icl2	Prkcq
S1pr1	1.8635817612226e-303	1.94086	0.706	0.29	3.08422781482341e-299	0.icl2	S1pr1
Acp5	1.56219769247654e-301	2.15274	0.632	0.226	2.58543718104868e-297	0.icl2	Acp5
Ablim1	8.27702485715784e-297	1.38991	0.889	0.568	1.36984761385962e-292	0.icl2	Ablim1
Fcer1g	2.49948207735661e-296	-6.51919	0.032	0.49	4.13664283802519e-292	0.icl2	Fcer1g
Foxp1	1.19358247687702e-294	1.13624	0.969	0.776	1.97537899923147e-290	0.icl2	Foxp1
Pitpnc1	5.8878266414194e-281	1.31868	0.919	0.62	9.7443530915491e-277	0.icl2	Pitpnc1
Dgka	6.77905345655398e-278	1.73553	0.727	0.349	1.12193334705968e-273	0.icl2	Dgka
Tyrobp	3.47456419490262e-274	-6.04549	0.049	0.485	5.75040374256384e-270	0.icl2	Tyrobp
Rps3a1	8.64869776483583e-270	0.626878	0.997	0.915	1.43135948008033e-265	0.icl2	Rps3a1
Cd247	1.3636080805768e-266	1.30891	0.855	0.459	2.25677137335461e-262	0.icl2	Cd247
Cd27	9.71130705862339e-261	1.82937	0.665	0.286	1.60722131820217e-256	0.icl2	Cd27
Tcf7	1.8783512115099e-253	1.33842	0.847	0.502	3.10867125504889e-249	0.icl2	Tcf7
Scml4	3.5656887053261e-253	1.747	0.723	0.362	5.9012148073147e-249	0.icl2	Scml4
Fam169b	1.92176388809735e-243	1.81569	0.625	0.243	3.18051923480111e-239	0.icl2	Fam169b
Arhgap15	1.20143101199269e-235	0.857011	0.987	0.857	1.9883683248479e-231	0.icl2	Arhgap15
Gm8369	1.6163344825053e-233	1.68245	0.626	0.237	2.67503356854627e-229	0.icl2	Gm8369
Plek	4.8915727981175e-229	-5.8529	0.022	0.406	8.09555298088447e-225	0.icl2	Plek
Ift80	6.9708498535509e-225	2.22927	0.489	0.152	1.15367565076267e-220	0.icl2	Ift80
Prkch	6.94916333395575e-223	1.07805	0.898	0.558	1.15008653176968e-218	0.icl2	Prkch
Anxa2	1.51946311407416e-217	-2.86485	0.137	0.539	2.51471145379274e-213	0.icl2	Anxa2
Gimap6	2.67242587576974e-217	1.21688	0.887	0.55	4.42286482439893e-213	0.icl2	Gimap6
Arl4c	2.05219223837015e-209	1.34074	0.759	0.448	3.39637815450259e-205	0.icl2	Arl4c
Saraf	6.16127020538363e-207	1.08697	0.877	0.63	1.01969021899099e-202	0.icl2	Saraf
S100a6	2.45904462278685e-206	-3.08065	0.286	0.63	4.06971885071224e-202	0.icl2	S100a6
S100a4	5.25198891797747e-206	-4.77019	0.076	0.437	8.69204165925272e-202	0.icl2	S100a4
Ccr9	5.34634369087447e-198	1.93077	0.445	0.126	8.84819880839725e-194	0.icl2	Ccr9
Lyn	3.28416082683326e-197	-3.80292	0.072	0.432	5.43528616840905e-193	0.icl2	Lyn
Klrk1	9.68177358491661e-196	-5.19592	0.02	0.362	1.6023335283037e-191	0.icl2	Klrk1
Lat	1.0950525110687e-195	1.51402	0.656	0.332	1.81231190581869e-191	0.icl2	Lat
Litaf	1.81961175395195e-194	-5.00196	0.028	0.373	3.01145745279048e-190	0.icl2	Litaf
Cd74	5.11033280376396e-194	-6.21288	0.117	0.469	8.45760079022935e-190	0.icl2	Cd74
Rps15a	9.78890083517839e-186	0.542937	0.997	0.904	1.62006308822202e-181	0.icl2	Rps15a
Tmem176b	1.62786022374187e-182	-4.61778	0.034	0.362	2.6941086702928e-178	0.icl2	Tmem176b
Aff3	2.86347081928721e-180	0.943627	0.853	0.523	4.73904420592034e-176	0.icl2	Aff3
Lrrk1	6.36030462453339e-179	-5.98647	0.015	0.33	1.05263041536028e-174	0.icl2	Lrrk1
Rps16	3.23992735376761e-177	0.505267	0.996	0.923	5.3620797704854e-173	0.icl2	Rps16
Rps24	2.06858882145965e-175	0.515301	0.999	0.937	3.42351449951572e-171	0.icl2	Rps24
Thy1	1.28865419294321e-174	1.32868	0.691	0.373	2.132722689321e-170	0.icl2	Thy1
Gimap3	2.41069461308047e-174	1.18264	0.739	0.421	3.98969958464818e-170	0.icl2	Gimap3
Igfbp4	2.02853265538498e-172	3.26418	0.277	0.048	3.35722154466214e-168	0.icl2	Igfbp4
Dennd4a	4.2166983497761e-171	-1.789	0.472	0.759	6.97863576887944e-167	0.icl2	Dennd4a
Rpl12	3.30341884868537e-170	0.58371	0.995	0.876	5.46715819457428e-166	0.icl2	Rpl12
Syk	3.86438522447117e-170	-6.10196	0.01	0.311	6.39555754649979e-166	0.icl2	Syk
Zeb2	4.19711399087475e-170	-5.28558	0.031	0.34	6.94622365489772e-166	0.icl2	Zeb2
Rps27	7.85815183813727e-170	0.515553	0.996	0.921	1.30052412921172e-165	0.icl2	Rps27
Tmem108	1.07697476685503e-169	2.4538	0.347	0.088	1.78239323914508e-165	0.icl2	Tmem108
Dapl1	1.1672321885152e-169	3.05756	0.322	0.073	1.93176927199266e-165	0.icl2	Dapl1
Capg	1.67590880574077e-167	-3.78683	0.05	0.367	2.77362907350097e-163	0.icl2	Capg
Myo1e	2.40627189521544e-167	-4.09736	0.05	0.367	3.98237998658155e-163	0.icl2	Myo1e
Itk	1.12641196856543e-166	0.931618	0.836	0.511	1.86421180797579e-162	0.icl2	Itk
Tmem176a	6.94873344707114e-166	-4.58634	0.038	0.344	1.15001538549027e-161	0.icl2	Tmem176a
Cd8b1	2.1975482968816e-165	2.71812	0.305	0.065	3.63694243133904e-161	0.icl2	Cd8b1
Rpl35a	2.76219445310062e-165	0.492385	0.997	0.922	4.57143181988152e-161	0.icl2	Rpl35a
Pde3b	3.85458797482418e-165	1.16856	0.767	0.482	6.37934309833403e-161	0.icl2	Pde3b
Bhlhe40	3.00485875740668e-164	-4.7106	0.025	0.327	4.97304124350806e-160	0.icl2	Bhlhe40
Ppm1h	1.01592284463635e-161	1.13847	0.787	0.551	1.68135230787316e-157	0.icl2	Ppm1h
Ptms	8.95348473397769e-160	-3.19779	0.069	0.386	1.48180172347331e-155	0.icl2	Ptms
Foxo1	1.18929072913855e-159	1.30744	0.692	0.435	1.9682761567243e-155	0.icl2	Foxo1
Osbpl3	1.16950326157194e-157	-4.25459	0.024	0.319	1.93552789790156e-153	0.icl2	Osbpl3
Rpl8	3.06068113594397e-157	0.500333	0.997	0.915	5.06542727998728e-153	0.icl2	Rpl8
Napsa	6.69255496472787e-154	-6.15289	0.009	0.286	1.10761784666246e-149	0.icl2	Napsa
Ets1	1.83633086580557e-151	0.830594	0.902	0.673	3.03912758290822e-147	0.icl2	Ets1
Limd2	3.56990299806318e-149	0.923184	0.848	0.656	5.90818946179456e-145	0.icl2	Limd2
Ifi27l2a	9.94172779873197e-149	0.84266	0.662	0.335	1.64535595069014e-144	0.icl2	Ifi27l2a
Pced1b	1.86587257903488e-148	1.44806	0.591	0.325	3.08801911830273e-144	0.icl2	Pced1b
Anxa1	1.90582232615931e-148	-5.28417	0.01	0.281	3.15413594979365e-144	0.icl2	Anxa1
Pik3ap1	2.71909116422172e-147	-4.55829	0.026	0.307	4.50009587678694e-143	0.icl2	Pik3ap1
Il18rap	4.97647760939813e-147	-3.45235	0.047	0.339	8.2360704435539e-143	0.icl2	Il18rap
Niban1	6.56591498213212e-146	-2.51527	0.124	0.441	1.08665892954287e-141	0.icl2	Niban1
Irf8	1.94129330296344e-144	-5.12266	0.036	0.314	3.21284041640449e-140	0.icl2	Irf8
Il18r1	2.55936769993501e-144	-2.35102	0.189	0.49	4.23575354339243e-140	0.icl2	Il18r1
Nfkbia	3.75861572198748e-144	-1.68012	0.495	0.753	6.22050901988928e-140	0.icl2	Nfkbia
Sell	9.89987366347117e-143	1.01196	0.73	0.417	1.63842909130448e-138	0.icl2	Sell
Sh3kbp1	1.43662531853086e-142	0.941531	0.842	0.675	2.37761490216857e-138	0.icl2	Sh3kbp1
H2-Eb1	9.09930003072946e-142	-6.21455	0.055	0.33	1.50593415508573e-137	0.icl2	H2-Eb1
Pim1	1.16150816193882e-141	-2.07991	0.25	0.568	1.92229600800875e-137	0.icl2	Pim1
St8sia1	2.8353333041812e-141	1.87933	0.373	0.125	4.69247661841988e-137	0.icl2	St8sia1
Cd2	3.48594852671887e-141	0.964467	0.716	0.417	5.76924481171972e-137	0.icl2	Cd2
Fam78a	2.86922692420268e-138	2.05259	0.392	0.148	4.74857055955544e-134	0.icl2	Fam78a
Actn1	1.16986434975582e-137	1.52502	0.462	0.193	1.93612549884589e-133	0.icl2	Actn1
Sox5	1.54395183353282e-137	2.05834	0.34	0.1	2.55524028449682e-133	0.icl2	Sox5
Arhgdib	1.87470060424557e-137	0.623957	0.958	0.827	3.10262950002641e-133	0.icl2	Arhgdib
Id2	2.14469499232471e-137	-1.78517	0.27	0.581	3.54947021229739e-133	0.icl2	Id2
Rps3	2.26962217384879e-137	0.470633	0.995	0.912	3.75622469771975e-133	0.icl2	Rps3
Trat1	7.26490277055717e-136	2.69113	0.267	0.06	1.20234140852721e-131	0.icl2	Trat1
Ripor2	1.5856063331391e-135	0.718543	0.929	0.72	2.62417848134521e-131	0.icl2	Ripor2
Clnk	2.17791693526949e-135	-7.60305	0.002	0.247	3.604452527871e-131	0.icl2	Clnk
Ikzf1	2.34098036950038e-135	0.779669	0.915	0.746	3.87432251152312e-131	0.icl2	Ikzf1
Lrmda	3.18710597052542e-133	-4.39861	0.016	0.268	5.27466038121956e-129	0.icl2	Lrmda
Dennd5a	1.49877427334643e-132	-3.26735	0.036	0.304	2.48047142238834e-128	0.icl2	Dennd5a
H2-Aa	1.75471960878073e-132	-5.99531	0.054	0.317	2.90406095253211e-128	0.icl2	H2-Aa
Rps29	2.44431711176855e-132	0.404318	0.998	0.943	4.04534481997695e-128	0.icl2	Rps29
H2-Ab1	1.27234272394084e-131	-5.64997	0.076	0.344	2.1057272081221e-127	0.icl2	H2-Ab1
Cd5	1.2895140476137e-131	1.93579	0.359	0.12	2.13414574880067e-127	0.icl2	Cd5
Rps7	1.4447100685133e-130	0.463123	0.996	0.908	2.39099516338951e-126	0.icl2	Rps7
Atf3	3.17236090566974e-130	-3.28037	0.064	0.338	5.25025729888341e-126	0.icl2	Atf3
Dock5	4.39276136105489e-130	-4.10625	0.024	0.278	7.27002005254585e-126	0.icl2	Dock5
Cd83	8.67756817001775e-130	-5.00271	0.02	0.269	1.43613753213794e-125	0.icl2	Cd83
Bcl2a1b	3.26553139874158e-129	-5.06258	0.019	0.267	5.40445446491732e-125	0.icl2	Bcl2a1b
Ctsh	4.49662619615828e-127	-6.35121	0.009	0.245	7.44191635464195e-123	0.icl2	Ctsh
Ifi30	2.47892481947787e-126	-4.30593	0.043	0.298	4.10262057623587e-122	0.icl2	Ifi30
Spi1	1.26674231948728e-125	-6.88409	0.005	0.236	2.09645853875145e-121	0.icl2	Spi1
Gab2	5.45525747654461e-125	-4.90395	0.015	0.254	9.02845112368132e-121	0.icl2	Gab2
Plcg2	9.20425392928199e-125	-3.5813	0.029	0.279	1.52330402529617e-120	0.icl2	Plcg2
Shisa5	1.12415063882161e-124	0.653007	0.946	0.756	1.86046930724976e-120	0.icl2	Shisa5
Vim	1.5549552782123e-124	-1.74858	0.41	0.66	2.57345098544135e-120	0.icl2	Vim
Rpl18	1.04029936753411e-123	0.441005	0.995	0.905	1.72169545326895e-119	0.icl2	Rpl18
Gng2	2.02982761793644e-123	-1.82146	0.148	0.451	3.3593647076848e-119	0.icl2	Gng2
Utrn	3.38454247277931e-123	0.787231	0.846	0.661	5.60141779244976e-119	0.icl2	Utrn
Samsn1	9.46675889030982e-123	-2.08576	0.26	0.55	1.56674859634627e-118	0.icl2	Samsn1
Rps18	1.79068926423443e-122	0.445545	0.997	0.906	2.96359073230798e-118	0.icl2	Rps18
Rasgef1b	2.07382305570689e-122	-3.8181	0.038	0.288	3.4321771571949e-118	0.icl2	Rasgef1b
Il6st	6.72446898106515e-122	1.40023	0.484	0.234	1.11289961636628e-117	0.icl2	Il6st
Dpp4	2.42502241542369e-121	1.00681	0.525	0.264	4.01341209752621e-117	0.icl2	Dpp4
Irak2	4.34089293483671e-121	-2.2391	0.12	0.409	7.18417780715475e-117	0.icl2	Irak2
Lgals3	1.15458155496198e-120	-5.82947	0.013	0.242	1.91083247346208e-116	0.icl2	Lgals3
Plxnc1	1.42435541764289e-120	-3.61339	0.047	0.303	2.35730821619898e-116	0.icl2	Plxnc1
Mef2c	4.51220236038263e-120	-5.16805	0.015	0.246	7.46769490643326e-116	0.icl2	Mef2c
Rpl19	1.35073677462235e-119	0.400327	0.996	0.939	2.235469362e-115	0.icl2	Rpl19
Itgb1	1.3739541020131e-119	-2.02966	0.191	0.484	2.27389403883168e-115	0.icl2	Itgb1
Rps8	7.50384420726179e-117	0.418194	0.998	0.926	1.24188621630183e-112	0.icl2	Rps8
Ccnd3	8.38722219575496e-117	0.803564	0.833	0.653	1.38808527339745e-112	0.icl2	Ccnd3
Pecam1	1.68247425729834e-116	1.33364	0.536	0.299	2.78449489582875e-112	0.icl2	Pecam1
Tcf12	1.75409549966923e-116	0.834556	0.843	0.667	2.90302805195257e-112	0.icl2	Tcf12
Coro1a	9.00711470788139e-116	0.526681	0.975	0.852	1.49067748415437e-111	0.icl2	Coro1a
Skap2	2.70009255375628e-115	-3.34149	0.052	0.299	4.46865317646664e-111	0.icl2	Skap2
Abtb2	4.05631483864217e-115	1.16007	0.551	0.295	6.71320105795279e-111	0.icl2	Abtb2
Rpl15	1.90324168829233e-114	0.456333	0.992	0.88	3.1498649941238e-110	0.icl2	Rpl15
Kctd12	2.24883182676665e-114	-2.81268	0.079	0.339	3.72181667329881e-110	0.icl2	Kctd12
Gas7	2.96305695848802e-114	-6.57893	0.004	0.217	4.90385926629767e-110	0.icl2	Gas7
Rps20	6.15383675592297e-114	0.449124	0.996	0.904	1.01845998310525e-109	0.icl2	Rps20
Ikzf2	2.28100729225724e-113	1.16979	0.656	0.425	3.77506706868573e-109	0.icl2	Ikzf2
Gimap4	7.18129939438536e-113	0.897333	0.665	0.381	1.18850504977078e-108	0.icl2	Gimap4
Tpd52	1.65978932131903e-112	-3.18247	0.074	0.329	2.74695132678299e-108	0.icl2	Tpd52
Tnik	2.46968860507804e-112	1.00346	0.708	0.474	4.08733464140416e-108	0.icl2	Tnik
Ccdc88a	5.50368176169413e-112	-4.96144	0.023	0.246	9.10859331560378e-108	0.icl2	Ccdc88a
Serinc3	1.49797002255541e-111	-1.16591	0.466	0.712	2.47914038732921e-107	0.icl2	Serinc3
Xcl1	2.91293266209071e-111	-4.2993	0.046	0.279	4.82090355576013e-107	0.icl2	Xcl1
St6gal1	3.53241648845947e-111	1.19195	0.583	0.356	5.84614928840043e-107	0.icl2	St6gal1
Tpt1	2.89517627440407e-110	0.384636	0.998	0.949	4.79151673413874e-106	0.icl2	Tpt1
Rpl11	3.59464926752724e-110	0.403332	0.996	0.911	5.94914453775759e-106	0.icl2	Rpl11
Nsg2	1.85960301186846e-109	1.74146	0.386	0.16	3.07764298464231e-105	0.icl2	Nsg2
Unc93b1	4.04761344949583e-109	-3.50996	0.046	0.279	6.6988002589156e-105	0.icl2	Unc93b1
Ptprj	6.85487917052673e-108	-2.89294	0.076	0.321	1.13448250272217e-103	0.icl2	Ptprj
Tdrp	9.35602913396492e-108	2.79111	0.218	0.05	1.54842282167119e-103	0.icl2	Tdrp
Cd6	3.02084029149397e-107	1.96583	0.299	0.099	4.99949068242253e-103	0.icl2	Cd6
Pfn1	4.19786387046436e-107	0.473869	0.987	0.901	6.94746470561851e-103	0.icl2	Pfn1
Cd226	4.62351891042756e-107	1.06861	0.612	0.368	7.65192379675761e-103	0.icl2	Cd226
Pik3ip1	1.49000484043304e-106	1.75481	0.393	0.177	2.46595801091668e-102	0.icl2	Pik3ip1
Art2b	1.92480537473592e-105	2.84354	0.2	0.042	3.18555289518794e-101	0.icl2	Art2b
Atp1b3	4.61862848591449e-105	0.852145	0.757	0.593	7.64383014418849e-101	0.icl2	Atp1b3
Fgf13	8.33722263506197e-105	1.04017	0.611	0.352	1.37981034610276e-100	0.icl2	Fgf13
Tgfbr2	3.38344956792449e-104	0.966913	0.715	0.542	5.59960903491503e-100	0.icl2	Tgfbr2
Il21r	1.54825300834828e-103	1.10842	0.476	0.243	2.5623587288164e-99	0.icl2	Il21r
Wdfy4	1.58944672971254e-103	-6.93787	0.008	0.205	2.63053433767426e-99	0.icl2	Wdfy4
Peli1	1.88478928213529e-103	0.843531	0.79	0.622	3.1193262619339e-99	0.icl2	Peli1
Hdac7	2.05953995415357e-103	1.66023	0.427	0.215	3.40853862412416e-99	0.icl2	Hdac7
Ly86	2.59041261851624e-103	-6.03777	0.006	0.202	4.28713288364437e-99	0.icl2	Ly86
Cst3	2.86056897180379e-103	-3.21986	0.348	0.598	4.73424164833527e-99	0.icl2	Cst3
Rpl9	2.8626334321744e-103	0.39515	0.995	0.91	4.73765833024864e-99	0.icl2	Rpl9
Plp2	6.54511039209133e-103	-2.76313	0.038	0.264	1.08321576989112e-98	0.icl2	Plp2
Entrep3	1.47021334651975e-102	1.34864	0.506	0.288	2.43320308849019e-98	0.icl2	Entrep3
Ncr1	2.64589043278404e-102	-7.11967	0.005	0.198	4.37894866625759e-98	0.icl2	Ncr1
Rab3ip	2.7017295651519e-102	1.72379	0.364	0.155	4.47136243032639e-98	0.icl2	Rab3ip
Rps10	5.03389455946507e-102	0.489916	0.976	0.854	8.33109549591469e-98	0.icl2	Rps10
Cfl1	5.30139913053865e-102	0.526366	0.975	0.86	8.77381556104147e-98	0.icl2	Cfl1
Chst11	6.57331058882039e-102	-2.14652	0.104	0.358	1.08788290244977e-97	0.icl2	Chst11
Slamf7	8.47528339833735e-102	-2.86606	0.054	0.284	1.40265940242483e-97	0.icl2	Slamf7
Ifi206	8.57315990161696e-102	1.67067	0.434	0.217	1.41885796371761e-97	0.icl2	Ifi206
Arpp21	1.49874199847104e-101	3.79438	0.138	0.015	2.48041800746958e-97	0.icl2	Arpp21
Bcl2a1d	1.58498079031188e-101	-5.57335	0.008	0.204	2.62314320796617e-97	0.icl2	Bcl2a1d
Klf3	2.20820855547246e-101	1.0743	0.628	0.411	3.65458515930692e-97	0.icl2	Klf3
Rpl30	3.4500073644472e-101	0.398149	0.996	0.913	5.70976218816011e-97	0.icl2	Rpl30
Mllt3	1.43055433227156e-100	1.0019	0.681	0.473	2.36756741990943e-96	0.icl2	Mllt3
Birc3	1.49020836886372e-100	-1.85219	0.221	0.492	2.46629485046946e-96	0.icl2	Birc3
Pxdc1	3.38206313170404e-100	-6.03209	0.004	0.194	5.59731448297018e-96	0.icl2	Pxdc1
Plac8	5.16138500957471e-100	-0.183691	0.642	0.323	8.54209219084614e-96	0.icl2	Plac8
Klre1	7.88087608089192e-100	-6.9005	0.005	0.195	1.30428499138761e-95	0.icl2	Klre1
Prr13	3.61531683290899e-99	-1.31525	0.234	0.524	5.98334935846438e-95	0.icl2	Prr13
Plekhm3	4.20095703840139e-99	-3.4795	0.033	0.245	6.95258389855429e-95	0.icl2	Plekhm3
Rps14	9.11253978864365e-99	0.367473	0.995	0.917	1.50812533502052e-94	0.icl2	Rps14
Ppic	1.23094839854976e-98	2.86691	0.187	0.038	2.03721959959985e-94	0.icl2	Ppic
Rplp2	1.67312558764035e-97	0.389167	0.995	0.913	2.76902284754478e-93	0.icl2	Rplp2
Tox	1.83954158232294e-97	0.76466	0.741	0.491	3.04444131874447e-93	0.icl2	Tox
Ckb	1.23755573959229e-96	-4.2601	0.017	0.212	2.04815474902524e-92	0.icl2	Ckb
Sdc4	1.66850836633327e-96	-5.62854	0.005	0.19	2.76138134628155e-92	0.icl2	Sdc4
Tbc1d8	3.45966939527314e-96	-5.47404	0.013	0.204	5.72575284917704e-92	0.icl2	Tbc1d8
Phactr2	3.76718701445436e-96	-3.53864	0.023	0.224	6.23469450892196e-92	0.icl2	Phactr2
Alox5ap	4.08837718166361e-96	-6.11958	0.008	0.194	6.76626423565328e-92	0.icl2	Alox5ap
Rpl7	6.34563793752095e-96	0.418758	0.994	0.888	1.05020307865972e-91	0.icl2	Rpl7
Smad7	7.26670114646961e-96	0.897575	0.676	0.48	1.20263903974072e-91	0.icl2	Smad7
Nebl	1.64428091624534e-95	-4.54613	0.015	0.206	2.72128491638604e-91	0.icl2	Nebl
Hmgb2	1.78976478192881e-95	-1.09828	0.551	0.758	2.96206071409218e-91	0.icl2	Hmgb2
Serpina3g	2.11876356036267e-95	-3.39277	0.023	0.222	3.50655369240023e-91	0.icl2	Serpina3g
Slc9a9	2.17630624932401e-95	0.831601	0.794	0.623	3.60178684263124e-91	0.icl2	Slc9a9
Pglyrp1	2.43420227983534e-95	-2.85023	0.077	0.307	4.02860477312748e-91	0.icl2	Pglyrp1
Odc1	2.99840164118859e-95	-2.33039	0.176	0.431	4.96235471616712e-91	0.icl2	Odc1
Pde7a	3.47681805962371e-95	0.779119	0.795	0.614	5.75413388867724e-91	0.icl2	Pde7a
Dscam	4.825780302018e-95	-5.43912	0.009	0.194	7.98666639983979e-91	0.icl2	Dscam
Ell2	6.20078552279636e-95	-3.04368	0.054	0.273	1.0262300040228e-90	0.icl2	Ell2
Satb1	6.30653398836834e-95	0.566896	0.76	0.522	1.04373137507496e-90	0.icl2	Satb1
Nkg7	8.27939446919949e-95	0.125916	0.82	0.427	1.37023978465252e-90	0.icl2	Nkg7
Dennd2d	2.79083333876169e-94	1.45384	0.419	0.212	4.61882917565059e-90	0.icl2	Dennd2d
S100a11	1.32800869784528e-93	-1.65868	0.62	0.762	2.19785439493394e-89	0.icl2	S100a11
Alcam	3.43279548716056e-93	-3.706	0.043	0.249	5.68127653125072e-89	0.icl2	Alcam
St3gal6	1.15994386165627e-92	-1.74622	0.154	0.407	1.91970709104112e-88	0.icl2	St3gal6
Rnf19b	1.21963534126501e-92	-2.18562	0.124	0.369	2.0184964897936e-88	0.icl2	Rnf19b
Rapgef6	1.34163680225859e-92	0.640628	0.878	0.74	2.22040890773797e-88	0.icl2	Rapgef6
Mapkapk2	2.05775900391797e-92	-2.13582	0.11	0.353	3.40559115148423e-88	0.icl2	Mapkapk2
Fgl2	2.32972688057569e-92	-4.52897	0.014	0.2	3.85569798735277e-88	0.icl2	Fgl2
Tle5	3.33300325172316e-92	0.745329	0.806	0.678	5.51612038160182e-88	0.icl2	Tle5
Jaml	3.79946326657801e-92	-2.17213	0.093	0.324	6.2881117061866e-88	0.icl2	Jaml
Marchf3	5.90626598600598e-92	-2.5232	0.086	0.311	9.77487020683989e-88	0.icl2	Marchf3
Gpr183	1.04752951708148e-91	-1.42441	0.211	0.471	1.73366135076984e-87	0.icl2	Gpr183
Marcks	1.27834976090131e-91	-3.44262	0.056	0.264	2.11566885429166e-87	0.icl2	Marcks
Gnaq	1.38381931915772e-91	-2.13718	0.112	0.349	2.29022097320603e-87	0.icl2	Gnaq
Rnf216	1.5205764766745e-91	-2.84852	0.036	0.241	2.51655406889629e-87	0.icl2	Rnf216
Ccr5	2.1321372950186e-91	-3.90255	0.02	0.209	3.52868722325578e-87	0.icl2	Ccr5
Hnrnpf	3.3425674576184e-91	0.576814	0.907	0.798	5.53194914235845e-87	0.icl2	Hnrnpf
Samd3	3.80357689043469e-91	-4.15793	0.017	0.203	6.29491975366941e-87	0.icl2	Samd3
Cd9	4.16197244425959e-91	-1.9129	0.218	0.467	6.88806439524962e-87	0.icl2	Cd9
Arhgap45	5.41873764764592e-91	0.591074	0.823	0.677	8.96801080685399e-87	0.icl2	Arhgap45
Klrb1f	7.4781752518969e-91	-6.33312	0.004	0.177	1.23763800418894e-86	0.icl2	Klrb1f
Mta3	1.08690150244498e-90	1.07489	0.572	0.394	1.79882198654644e-86	0.icl2	Mta3
Klrc2	1.16418524918839e-90	-5.99206	0.005	0.18	1.92672658740678e-86	0.icl2	Klrc2
Nfkb1	1.52143393499578e-90	-1.45551	0.481	0.698	2.51797316241802e-86	0.icl2	Nfkb1
Rack1	1.63569075510089e-89	0.410588	0.99	0.878	2.70706819969197e-85	0.icl2	Rack1
Rplp1	1.85317122987315e-89	0.360827	0.997	0.93	3.06699838544007e-85	0.icl2	Rplp1
Cdk14	2.03320630415941e-89	-5.09963	0.014	0.194	3.36495643338383e-85	0.icl2	Cdk14
Gadd45b	3.16216405437459e-89	-2.30307	0.176	0.417	5.23338150998995e-85	0.icl2	Gadd45b
Lmo4	6.71814777370359e-89	-2.12852	0.119	0.355	1.11185345654794e-84	0.icl2	Lmo4
Dusp5	8.36983298477172e-89	-1.90723	0.129	0.367	1.38520735897972e-84	0.icl2	Dusp5
Cebpb	1.50129517745642e-88	-2.53452	0.168	0.409	2.48464351869038e-84	0.icl2	Cebpb
Klrb1c	1.64986377114247e-88	-6.13595	0.006	0.177	2.73052454124079e-84	0.icl2	Klrb1c
Ltb	2.3684738343012e-88	0.508998	0.909	0.671	3.91982419576849e-84	0.icl2	Ltb
Ifi213	2.72153311441556e-88	1.6533	0.367	0.173	4.50413730435775e-84	0.icl2	Ifi213
Cmah	7.94104066224856e-88	1.14757	0.47	0.247	1.31424222960214e-83	0.icl2	Cmah
Sub1	1.27835993341428e-87	-0.757689	0.82	0.86	2.11568568980064e-83	0.icl2	Sub1
Gsap	2.82568561261549e-87	-2.6266	0.067	0.278	4.67650968887863e-83	0.icl2	Gsap
Efhd2	3.07521117940243e-87	-1.6635	0.187	0.437	5.08947450191102e-83	0.icl2	Efhd2
Rpl35	6.24365739782284e-87	0.421389	0.985	0.866	1.03332529933968e-82	0.icl2	Rpl35
Ipcef1	7.33567851342718e-87	0.914733	0.609	0.398	1.2140547939722e-82	0.icl2	Ipcef1
Nav1	1.18855750369464e-86	-6.04284	0.008	0.178	1.96706266861464e-82	0.icl2	Nav1
Cbfa2t3	2.24747362485054e-86	-4.52446	0.01	0.184	3.71956884912764e-82	0.icl2	Cbfa2t3
Stx11	2.29769171317563e-86	-3.77728	0.015	0.193	3.80267978530566e-82	0.icl2	Stx11
Anxa5	2.44061554220151e-86	-1.83351	0.107	0.346	4.0392187223435e-82	0.icl2	Anxa5
Plbd1	4.01711267630103e-86	-6.53436	0.007	0.175	6.64832147927821e-82	0.icl2	Plbd1
Nfil3	8.23673472053505e-86	-3.16067	0.038	0.232	1.36317959624855e-81	0.icl2	Nfil3
Pag1	2.12605563827612e-85	0.753323	0.727	0.552	3.51862208134698e-81	0.icl2	Pag1
Ifrd1	2.99336533836707e-85	-1.33652	0.512	0.708	4.9540196349975e-81	0.icl2	Ifrd1
Rps28	1.03129964977679e-84	0.378639	0.993	0.902	1.70680092038058e-80	0.icl2	Rps28
Mpeg1	1.18323275620899e-84	-6.49788	0.006	0.17	1.95825021152588e-80	0.icl2	Mpeg1
Mgst2	2.79146091474771e-84	1.52104	0.394	0.206	4.61986781390746e-80	0.icl2	Mgst2
Jak1	2.8798920769883e-84	0.533518	0.92	0.792	4.76622138741564e-80	0.icl2	Jak1
Maml2	3.59400406067468e-84	0.725424	0.76	0.557	5.94807672041659e-80	0.icl2	Maml2
Hk2	4.46463822342786e-84	-3.87376	0.019	0.196	7.3889762597731e-80	0.icl2	Hk2
Trib2	5.54961844787154e-84	1.89504	0.285	0.111	9.18461853122741e-80	0.icl2	Trib2
Sytl3	5.95783233816187e-84	-2.65174	0.081	0.29	9.8602125196579e-80	0.icl2	Sytl3
Cd244a	5.67286658463143e-83	-4.59445	0.01	0.177	9.38859419756501e-79	0.icl2	Cd244a
Kcnn4	6.67378196544021e-83	1.51604	0.365	0.177	1.10451091528035e-78	0.icl2	Kcnn4
Top2b	8.01942776297835e-83	1.00007	0.639	0.494	1.32721529477292e-78	0.icl2	Top2b
Arsb	8.19372560790815e-83	-2.72146	0.061	0.261	1.3560615881088e-78	0.icl2	Arsb
Rps19	8.49186863629934e-83	0.357351	0.997	0.917	1.40540425930754e-78	0.icl2	Rps19
Ssbp2	2.05605327365084e-82	1.26392	0.514	0.323	3.40276816789213e-78	0.icl2	Ssbp2
Icam1	3.08974658985317e-82	-2.00435	0.125	0.353	5.113530606207e-78	0.icl2	Icam1
Cybb	5.09148580616858e-82	-6.85734	0.005	0.165	8.42640900920901e-78	0.icl2	Cybb
Fmnl2	5.95870534534292e-82	-6.38899	0.007	0.167	9.86165734654253e-78	0.icl2	Fmnl2
Csf2ra	7.52173314621135e-82	-4.11341	0.019	0.192	1.24484683569798e-77	0.icl2	Csf2ra
Irf5	1.49640808209257e-81	-5.59128	0.006	0.166	2.4765553758632e-77	0.icl2	Irf5
Myo1f	2.22141423262413e-81	-1.63608	0.175	0.416	3.67644055499293e-77	0.icl2	Myo1f
Rnh1	2.52592528471889e-81	-1.40139	0.14	0.388	4.18040634620976e-77	0.icl2	Rnh1
Tmem163	2.64235175155748e-81	-4.87772	0.012	0.176	4.37309214882763e-77	0.icl2	Tmem163
Gimap8	2.93965857094906e-81	1.14215	0.512	0.321	4.86513493492069e-77	0.icl2	Gimap8
Rac2	6.98344845796065e-81	0.50427	0.925	0.779	1.15576071979249e-76	0.icl2	Rac2
Serpinb1a	7.2686141097954e-81	-4.58526	0.011	0.175	1.20295563517114e-76	0.icl2	Serpinb1a
Psap	3.31539337312995e-80	-2.14166	0.374	0.592	5.48697603253007e-76	0.icl2	Psap
Rasgrp2	5.93716244794221e-80	1.16907	0.513	0.336	9.82600385134436e-76	0.icl2	Rasgrp2
Antxr2	6.32432113586955e-80	-2.53647	0.131	0.352	1.04667514798641e-75	0.icl2	Antxr2
Galnt10	9.36022496494715e-80	1.31406	0.442	0.255	1.54911723169875e-75	0.icl2	Galnt10
Klrc1	1.209354148562e-79	-5.27921	0.008	0.166	2.0014811158701e-75	0.icl2	Klrc1
Grk3	1.44408526195689e-79	-5.33274	0.01	0.171	2.38996110853865e-75	0.icl2	Grk3
Dusp1	1.66363943864867e-79	-1.4413	0.368	0.596	2.75332327096354e-75	0.icl2	Dusp1
Lmna	1.69633207476741e-79	-2.62897	0.051	0.242	2.80742958374006e-75	0.icl2	Lmna
Rpl5	3.08846741271467e-79	0.416709	0.981	0.867	5.11141356804277e-75	0.icl2	Rpl5
Rpl17	4.68383907183373e-79	0.331098	0.995	0.922	7.75175366388482e-75	0.icl2	Rpl17
Rap1gap2	1.14189622892474e-78	-2.99764	0.034	0.212	1.88983825887044e-74	0.icl2	Rap1gap2
Atf6	1.25531363805707e-78	-1.52418	0.143	0.378	2.07754407098444e-74	0.icl2	Atf6
Klf13	1.67123972386782e-78	0.806868	0.676	0.522	2.76590174300125e-74	0.icl2	Klf13
Syngr2	1.72321934965352e-78	-2.1927	0.072	0.275	2.85192802367658e-74	0.icl2	Syngr2
Ctnna1	2.28567135310665e-78	-2.53186	0.053	0.247	3.7827860893915e-74	0.icl2	Ctnna1
Rpl10a	5.19727428183395e-78	0.385676	0.989	0.877	8.60148893643518e-74	0.icl2	Rpl10a
Scpep1	5.31801502361128e-78	-2.89481	0.031	0.209	8.80131486407666e-74	0.icl2	Scpep1
Sirpa	6.15649066276102e-78	-7.04438	0.003	0.153	1.01889920468695e-73	0.icl2	Sirpa
Lyst	9.95708655366247e-78	-2.02072	0.26	0.496	1.64789782463114e-73	0.icl2	Lyst
Pirb	1.84613914727961e-77	-5.64104	0.006	0.159	3.05536028874776e-73	0.icl2	Pirb
Fgr	1.8876953766116e-77	-3.96908	0.028	0.198	3.1241358482922e-73	0.icl2	Fgr
Gcnt2	2.16080348197262e-77	-5.10965	0.011	0.169	3.57612976266469e-73	0.icl2	Gcnt2
Myo5a	3.53875448256003e-77	-3.28866	0.03	0.204	5.85663866863685e-73	0.icl2	Myo5a
Fth1	5.02088634878579e-77	-0.997941	0.978	0.924	8.30956690724048e-73	0.icl2	Fth1
Rel	5.90497637499187e-77	-1.53404	0.36	0.587	9.77273590061155e-73	0.icl2	Rel
Tmcc3	6.31253376679818e-77	-6.10573	0.011	0.167	1.0447243384051e-72	0.icl2	Tmcc3
Zbtb16	8.82622496779217e-77	-4.03234	0.015	0.176	1.4607402321696e-72	0.icl2	Zbtb16
Ccdc50	1.27868327646122e-76	-1.61202	0.106	0.327	2.11622082254332e-72	0.icl2	Ccdc50
Plcb4	2.78485564899597e-76	-2.63068	0.05	0.235	4.60893609908833e-72	0.icl2	Plcb4
Il2rb	3.0557668484458e-76	-1.7	0.244	0.448	5.0572941341778e-72	0.icl2	Il2rb
Csf2rb	5.31829349934867e-76	-6.75419	0.003	0.15	8.80177574142205e-72	0.icl2	Csf2rb
Ern1	7.89683883484933e-76	-2.34345	0.135	0.346	1.30692682716756e-71	0.icl2	Ern1
Fndc3b	8.88537913092378e-76	-3.65109	0.019	0.183	1.47053024616789e-71	0.icl2	Fndc3b
Prkce	8.90355685208535e-76	-1.70301	0.106	0.322	1.47353865902012e-71	0.icl2	Prkce
Adam8	4.95191458678394e-75	-6.51129	0.003	0.149	8.19541864112742e-71	0.icl2	Adam8
Chd3	9.6051052135684e-75	0.790848	0.601	0.426	1.58964491284557e-70	0.icl2	Chd3
Slc8a1	1.63481118885342e-74	-5.95958	0.007	0.155	2.70561251755241e-70	0.icl2	Slc8a1
Ncf2	1.79419835237256e-74	-4.61205	0.013	0.168	2.96939827317659e-70	0.icl2	Ncf2
Add3	3.92400707532728e-74	0.907313	0.609	0.448	6.49423170966665e-70	0.icl2	Add3
Rpl21	4.42392798850625e-74	0.356155	0.995	0.903	7.32160082097785e-70	0.icl2	Rpl21
Selenow	5.94784905409659e-74	0.574016	0.859	0.726	9.84369018452985e-70	0.icl2	Selenow
Rhob	9.57094377748061e-74	-1.41183	0.23	0.463	1.58399119517304e-69	0.icl2	Rhob
Rassf4	1.69720302828645e-73	-6.08231	0.004	0.148	2.80887101181407e-69	0.icl2	Rassf4
Cdkn1a	2.42603836770758e-73	-4.88187	0.009	0.159	4.01509349855605e-69	0.icl2	Cdkn1a
Lat2	3.84818751128672e-73	-2.809	0.028	0.195	6.36875033117953e-69	0.icl2	Lat2
Fosl2	6.10862872286316e-73	-2.34208	0.082	0.275	1.01097805363385e-68	0.icl2	Fosl2
Rab11fip1	7.34952751901025e-73	-2.58427	0.068	0.256	1.2163468043962e-68	0.icl2	Rab11fip1
Ctsz	9.23133299686393e-73	-2.05447	0.167	0.377	1.52778561098098e-68	0.icl2	Ctsz
Pkig	1.56798818902319e-72	-3.75128	0.016	0.17	2.59502045283338e-68	0.icl2	Pkig
Lgals1	1.65184807855377e-72	-1.41787	0.412	0.598	2.73380857000649e-68	0.icl2	Lgals1
Pbx1	1.77366013587917e-72	-5.20276	0.009	0.156	2.93540752488002e-68	0.icl2	Pbx1
Mdfic	2.02896162193221e-72	-1.99678	0.087	0.286	3.3579314842978e-68	0.icl2	Mdfic
Ifitm2	2.36358876395762e-72	-5.26979	0.013	0.162	3.91173940434986e-68	0.icl2	Ifitm2
Cyfip1	2.63165371365662e-72	-2.62006	0.032	0.202	4.3553868961017e-68	0.icl2	Cyfip1
App	3.68843076743268e-72	-3.60695	0.024	0.184	6.10435292010109e-68	0.icl2	App
Tespa1	3.91371533607398e-72	0.982051	0.567	0.394	6.47719888120244e-68	0.icl2	Tespa1
Itgax	4.84050700151187e-72	-5.60914	0.005	0.147	8.01103908750214e-68	0.icl2	Itgax
Trio	6.89957622724164e-72	-1.71614	0.127	0.343	1.14187986560849e-67	0.icl2	Trio
Clic4	8.54816646897605e-72	-2.25758	0.148	0.359	1.41472155061554e-67	0.icl2	Clic4
Marchf1	9.85469437619343e-72	-6.45345	0.004	0.144	1.63095191926001e-67	0.icl2	Marchf1
Spag9	1.06979524526434e-71	-1.52628	0.359	0.583	1.77051113091248e-67	0.icl2	Spag9
Herpud1	1.48596160753081e-71	-1.48335	0.206	0.439	2.45926646046348e-67	0.icl2	Herpud1
Prkcd	2.09192251626958e-71	-2.43458	0.081	0.273	3.46213176442615e-67	0.icl2	Prkcd
Gfod1	5.2571322115397e-71	-1.9975	0.092	0.291	8.7005538100982e-67	0.icl2	Gfod1
Snrpd3	7.69196922669124e-71	0.905245	0.594	0.457	1.2730209070174e-66	0.icl2	Snrpd3
Rps23	7.87704180325545e-71	0.322649	0.996	0.923	1.30365041843878e-66	0.icl2	Rps23
Stk4	2.04199098484462e-70	0.573078	0.793	0.669	3.37949507991784e-66	0.icl2	Stk4
Hck	3.76064458565567e-70	-6.7068	0.002	0.138	6.22386678926014e-66	0.icl2	Hck
Rhoq	3.9379808128675e-70	-2.32513	0.056	0.234	6.51735824529571e-66	0.icl2	Rhoq
Relb	4.72843850437306e-70	-1.92811	0.148	0.364	7.82556572473741e-66	0.icl2	Relb
Il2ra	1.07835946566649e-69	-2.94026	0.032	0.194	1.78468491567803e-65	0.icl2	Il2ra
H2-DMb1	1.22400757986082e-69	-4.77873	0.01	0.154	2.02573254466966e-65	0.icl2	H2-DMb1
Pld4	1.95868544978167e-69	-4.61473	0.013	0.158	3.24162441938866e-65	0.icl2	Pld4
Snrpg	3.930182653012e-69	0.519815	0.903	0.77	6.50445229073486e-65	0.icl2	Snrpg
Lpcat2	4.23446926635818e-69	-3.82232	0.015	0.162	7.00804663582279e-65	0.icl2	Lpcat2
Blk	4.80303730619993e-69	-4.11918	0.021	0.17	7.94902674176088e-65	0.icl2	Blk
Il27ra	6.5396993995677e-69	1.1506	0.454	0.283	1.08232025062845e-64	0.icl2	Il27ra
Eml6	9.48295350390806e-69	-4.01047	0.01	0.152	1.56942880489678e-64	0.icl2	Eml6
Rbm47	9.51885541330316e-69	-3.46119	0.021	0.173	1.57537057090167e-64	0.icl2	Rbm47
Leprotl1	1.17336176436384e-68	0.788225	0.641	0.504	1.94191372002215e-64	0.icl2	Leprotl1
Zc3h12c	1.44288202338349e-68	-6.43783	0.003	0.138	2.38796974869968e-64	0.icl2	Zc3h12c
Grn	2.01951031520223e-68	-3.80801	0.022	0.173	3.34228957165969e-64	0.icl2	Grn
Bin2	2.51776522875247e-68	0.714721	0.691	0.548	4.16690145358535e-64	0.icl2	Bin2
Cd81	3.18876716666622e-68	-3.72339	0.016	0.162	5.27740966083259e-64	0.icl2	Cd81
Arhgef18	3.727452636416e-68	0.792313	0.588	0.408	6.16893411326849e-64	0.icl2	Arhgef18
Il1r1	4.12493882189867e-68	-5.98958	0.004	0.139	6.82677375024229e-64	0.icl2	Il1r1
Mbnl1	4.2518004004399e-68	0.414306	0.975	0.87	7.03672966272803e-64	0.icl2	Mbnl1
Hhex	5.16542503211021e-68	-6.17666	0.002	0.134	8.54877842814239e-64	0.icl2	Hhex
Kit	6.42015132278327e-68	-3.90242	0.02	0.169	1.06253504392063e-63	0.icl2	Kit
Hspa5	1.27430393154061e-67	-0.905625	0.671	0.801	2.10897300669971e-63	0.icl2	Hspa5
Klf4	1.31377315960137e-67	-1.99948	0.114	0.31	2.17429457914027e-63	0.icl2	Klf4
Nav2	1.43752538471985e-67	-2.77605	0.029	0.185	2.37910451171135e-63	0.icl2	Nav2
Nbea	1.77371623370319e-67	-2.90744	0.023	0.175	2.93550036677878e-63	0.icl2	Nbea
Kynu	2.02579220959968e-67	-5.52122	0.004	0.138	3.35268610688747e-63	0.icl2	Kynu
Bicdl1	2.82440641604446e-67	1.86435	0.238	0.092	4.67439261855358e-63	0.icl2	Bicdl1
Car2	3.07210378493917e-67	-4.00811	0.013	0.154	5.08433176407433e-63	0.icl2	Car2
Gria3	8.87669072668975e-67	1.04601	0.276	0.112	1.46909231526715e-62	0.icl2	Gria3
Nfkbiz	1.25251270164287e-66	-1.43767	0.307	0.524	2.07290852121895e-62	0.icl2	Nfkbiz
Rps27a	1.35970940487959e-66	0.300001	0.995	0.925	2.25031906507573e-62	0.icl2	Rps27a
Tank	2.16346564413097e-66	-1.65967	0.232	0.446	3.58053564103675e-62	0.icl2	Tank
Rps13	2.35421377341272e-66	0.324069	0.994	0.911	3.89622379499805e-62	0.icl2	Rps13
Tanc1	2.89850789783724e-66	1.46673	0.342	0.179	4.79703057092063e-62	0.icl2	Tanc1
Prkca	4.05396143195188e-66	0.576896	0.631	0.434	6.70930616988035e-62	0.icl2	Prkca
Klf2	5.25337313866916e-66	0.456735	0.95	0.785	8.69433254449745e-62	0.icl2	Klf2
Spry2	5.27229601377604e-66	-2.8302	0.033	0.188	8.72564990279935e-62	0.icl2	Spry2
Gimap1	5.63221034719544e-66	0.759481	0.625	0.455	9.32130812460845e-62	0.icl2	Gimap1
Ciita	7.27859350359908e-66	-5.95724	0.004	0.134	1.20460722484565e-61	0.icl2	Ciita
Adam12	8.19256058737978e-66	-6.24717	0.002	0.13	1.35586877721135e-61	0.icl2	Adam12
Cotl1	1.01389487604639e-65	0.571265	0.813	0.673	1.67799601985678e-61	0.icl2	Cotl1
Hmgn3	1.10025860829242e-65	-3.73934	0.009	0.145	1.82092799672396e-61	0.icl2	Hmgn3
Entpd1	1.18723987575816e-65	-5.07138	0.007	0.14	1.96488199437976e-61	0.icl2	Entpd1
Ccl5	2.1735238706983e-65	-2.35373	0.337	0.502	3.59718200600569e-61	0.icl2	Ccl5
Rpl23	2.19964476684381e-65	0.31196	0.997	0.927	3.6404120891265e-61	0.icl2	Rpl23
Rps4x	2.69342178461072e-65	0.340689	0.996	0.898	4.45761305353075e-61	0.icl2	Rps4x
Sidt1	3.06933180533231e-65	0.721571	0.544	0.328	5.07974413782497e-61	0.icl2	Sidt1
Cited4	3.42429062562594e-65	-5.00703	0.006	0.138	5.66720098541093e-61	0.icl2	Cited4
Ccr6	3.43457113466422e-65	-7.79741	0	0.126	5.68421522786928e-61	0.icl2	Ccr6
Junb	3.660999513866e-65	-1.04894	0.709	0.815	6.05895419544823e-61	0.icl2	Junb
Mmp25	4.52434363773315e-65	-7.16407	0.001	0.127	7.48778872044837e-61	0.icl2	Mmp25
Naca	1.15846187347905e-64	0.385561	0.977	0.858	1.91725440060783e-60	0.icl2	Naca
Nck2	1.69787320990828e-64	0.968957	0.448	0.275	2.80998016239821e-60	0.icl2	Nck2
Iqgap1	3.02103709188899e-64	-0.960524	0.534	0.722	4.99981638707628e-60	0.icl2	Iqgap1
Stk38	1.35998558546787e-63	0.902312	0.57	0.431	2.25077614394933e-59	0.icl2	Stk38
Map3k8	2.01136601119138e-63	-1.52235	0.134	0.333	3.32881074852174e-59	0.icl2	Map3k8
Arhgef1	2.42150742636398e-63	0.641944	0.67	0.534	4.00759479063239e-59	0.icl2	Arhgef1
Cox7a2l	2.6463501976294e-63	0.540917	0.84	0.723	4.37970957707665e-59	0.icl2	Cox7a2l
Cnn2	3.44518841383806e-63	0.71077	0.68	0.551	5.70178682490199e-59	0.icl2	Cnn2
Ankrd33b	4.07330142419283e-63	-7.10089	0.003	0.128	6.74131385703914e-59	0.icl2	Ankrd33b
Itga2	4.19122522880306e-63	-4.02539	0.014	0.149	6.93647775366907e-59	0.icl2	Itga2
Slc15a3	6.98630090866273e-63	-5.32106	0.004	0.129	1.15623280038368e-58	0.icl2	Slc15a3
Pacsin2	1.04589990963774e-62	-2.06543	0.062	0.235	1.73096435045046e-58	0.icl2	Pacsin2
Camk4	1.06247252385238e-62	0.428122	0.583	0.361	1.75839202697569e-58	0.icl2	Camk4
Hip1	1.19834250597289e-62	-2.54346	0.029	0.177	1.98325684738514e-58	0.icl2	Hip1
Hspe1	1.28874986105717e-62	0.529343	0.88	0.764	2.13288102004962e-58	0.icl2	Hspe1
Psme1	1.3652956842331e-62	0.507259	0.864	0.753	2.25956435740578e-58	0.icl2	Psme1
Sox4	1.63073393966415e-62	1.39228	0.279	0.124	2.69886467014416e-58	0.icl2	Sox4
Rpl28	2.97385638181891e-62	0.301033	0.993	0.915	4.9217323119103e-58	0.icl2	Rpl28
Rogdi	3.69317485475062e-62	-4.20761	0.012	0.145	6.11220438461228e-58	0.icl2	Rogdi
Cd180	3.77357592216322e-62	-5.71073	0.001	0.122	6.24526815118012e-58	0.icl2	Cd180
Abi3bp	4.81357533700079e-62	-8.04217	0.001	0.121	7.96646718273631e-58	0.icl2	Abi3bp
Zfp36	8.51238837622957e-62	-1.29768	0.411	0.598	1.40880027626599e-57	0.icl2	Zfp36
Mreg	9.55222238359698e-62	-6.35939	0.004	0.128	1.5808928044853e-57	0.icl2	Mreg
Serpinb6b	9.67106818911476e-62	-2.77149	0.054	0.213	1.60056178529849e-57	0.icl2	Serpinb6b
Mif	1.17275127814385e-61	0.546976	0.715	0.579	1.94090336532806e-57	0.icl2	Mif
Ptprcap	1.63147049081483e-61	0.479852	0.871	0.679	2.70008366229855e-57	0.icl2	Ptprcap
Rnase6	1.72227641087951e-61	-4.5915	0.015	0.148	2.85036746000559e-57	0.icl2	Rnase6
Snx18	2.15140703724919e-61	-1.75352	0.099	0.282	3.56057864664741e-57	0.icl2	Snx18
Metrnl	3.20506704650677e-61	-4.22902	0.008	0.135	5.30438596196871e-57	0.icl2	Metrnl
Tbc1d9	5.48037616568167e-61	-7.13395	0.001	0.12	9.07002255420316e-57	0.icl2	Tbc1d9
Aoah	5.5355138178491e-61	-7.31984	0.001	0.119	9.16127536854026e-57	0.icl2	Aoah
Klf12	6.15113888993168e-61	-3.10601	0.023	0.161	1.01801348628369e-56	0.icl2	Klf12
Zc3h12a	7.3138782342415e-61	-1.51798	0.132	0.329	1.21044684776697e-56	0.icl2	Zc3h12a
Rps12	9.10816174396171e-61	-0.371072	0.992	0.924	1.50740076862566e-56	0.icl2	Rps12
Slamf6	1.0117338962598e-60	1.17021	0.334	0.172	1.67441959830997e-56	0.icl2	Slamf6
Mthfs	1.23832643552847e-60	-1.60317	0.077	0.254	2.04943025079961e-56	0.icl2	Mthfs
Ogfrl1	1.8465516221553e-60	-3.43768	0.022	0.159	3.05604293466701e-56	0.icl2	Ogfrl1
Tnfrsf1b	2.20091619536205e-60	-1.71698	0.113	0.299	3.64251630332419e-56	0.icl2	Tnfrsf1b
Apba1	3.09209615231982e-60	-6.81823	0.002	0.12	5.1174191320893e-56	0.icl2	Apba1
Fes	3.34478486887084e-60	-3.22501	0.014	0.145	5.53561895798124e-56	0.icl2	Fes
Vav3	3.39055135800136e-60	-1.76813	0.142	0.335	5.61136249749226e-56	0.icl2	Vav3
Rnf43	3.62234980111793e-60	-3.48014	0.013	0.143	5.99498892085017e-56	0.icl2	Rnf43
Dtx1	4.79307728690389e-60	1.77021	0.27	0.126	7.93254290982594e-56	0.icl2	Dtx1
Sbf2	6.70510278228843e-60	-2.95502	0.028	0.17	1.10969451046874e-55	0.icl2	Sbf2
Adam23	1.03698877343341e-59	-6.89828	0.008	0.13	1.71621642003229e-55	0.icl2	Adam23
Srpk1	1.42100426411705e-59	0.911284	0.51	0.366	2.35176205711372e-55	0.icl2	Srpk1
Rps26	1.55529700949285e-59	0.30618	0.986	0.897	2.57401655071066e-55	0.icl2	Rps26
Cerk	1.96107442863129e-59	-1.40975	0.124	0.32	3.24557817938479e-55	0.icl2	Cerk
Tnfaip2	2.04983330758923e-59	-7.36213	0.002	0.119	3.39247412406017e-55	0.icl2	Tnfaip2
Sp100	2.12659084574778e-59	0.67389	0.717	0.6	3.51950784971258e-55	0.icl2	Sp100
Nr4a3	2.1870398129055e-59	-2.51707	0.069	0.232	3.6195508903586e-55	0.icl2	Nr4a3
Sat1	2.98063302543421e-59	-1.336	0.34	0.552	4.93294765709362e-55	0.icl2	Sat1
Cd300c2	3.06976597379837e-59	-9.78259	0	0.114	5.0804626866363e-55	0.icl2	Cd300c2
Ccdc117	3.27443886341257e-59	1.16279	0.462	0.312	5.41919631894781e-55	0.icl2	Ccdc117
Casp4	4.59728605536658e-59	-2.09946	0.052	0.209	7.6085084216317e-55	0.icl2	Casp4
Ccl3	5.11059682032052e-59	-4.5996	0.023	0.156	8.45803773763046e-55	0.icl2	Ccl3
Nfkb2	6.75108036766159e-59	-1.6421	0.109	0.297	1.11730380084799e-54	0.icl2	Nfkb2
Plekho2	9.40964254676698e-59	-2.00756	0.071	0.239	1.55729584148994e-54	0.icl2	Plekho2
H2az1	1.2754128599741e-58	-1.00826	0.756	0.819	2.11080828325714e-54	0.icl2	H2az1
Kbtbd11	1.43766391368412e-58	1.20149	0.382	0.227	2.37933377714723e-54	0.icl2	Kbtbd11
Klk8	1.57460075714418e-58	0.960598	0.464	0.298	2.60596425307362e-54	0.icl2	Klk8
Pkib	1.75599545995135e-58	-5.62731	0.003	0.119	2.90617248621949e-54	0.icl2	Pkib
Thada	2.33873889609122e-58	0.869515	0.53	0.377	3.87061287303097e-54	0.icl2	Thada
Kdm6b	2.8152462642398e-58	-1.80385	0.194	0.386	4.65923256731687e-54	0.icl2	Kdm6b
Atp2b1	3.24675795386084e-58	-0.986792	0.468	0.659	5.37338441363969e-54	0.icl2	Atp2b1
Il10ra	3.69567191128521e-58	-1.93474	0.074	0.242	6.11633701317702e-54	0.icl2	Il10ra
Tex2	4.83081226261607e-58	-1.55021	0.163	0.353	7.9949942946296e-54	0.icl2	Tex2
Specc1	6.39603323930356e-58	-4.61566	0.009	0.131	1.05854350110474e-53	0.icl2	Specc1
1700025G04Rik	7.23556469164714e-58	-1.57252	0.121	0.3	1.1974859564676e-53	0.icl2	1700025G04Rik
Ppia	1.10258264171707e-57	0.304562	0.994	0.884	1.82477427204176e-53	0.icl2	Ppia
Shtn1	1.744684520076e-57	-5.97687	0.003	0.117	2.88745288072577e-53	0.icl2	Shtn1
H2-Q7	1.89848353827007e-57	0.402418	0.931	0.791	3.14199025583697e-53	0.icl2	H2-Q7
Gpx1	2.07508712335471e-57	-1.3881	0.407	0.578	3.43426918915204e-53	0.icl2	Gpx1
Cpd	2.87238734262056e-57	-3.50807	0.011	0.134	4.75380105203703e-53	0.icl2	Cpd
Prr5l	4.13735506388534e-57	-3.70763	0.013	0.137	6.84732263073023e-53	0.icl2	Prr5l
Snx9	5.21524151613223e-57	-2.18156	0.053	0.207	8.63122470919885e-53	0.icl2	Snx9
Igf1r	5.9931542217147e-57	-1.69616	0.195	0.379	9.91867023693782e-53	0.icl2	Igf1r
Lst1	8.18399949316926e-57	-3.38101	0.047	0.191	1.35445191611951e-52	0.icl2	Lst1
Arhgap24	9.78228580188742e-57	-6.41608	0.004	0.117	1.61896830021237e-52	0.icl2	Arhgap24
Ptpre	1.03662846849717e-56	-1.59169	0.115	0.298	1.71562011536281e-52	0.icl2	Ptpre
Klri2	1.07406101704052e-56	-6.1933	0.004	0.118	1.77757098320207e-52	0.icl2	Klri2
Inpp5d	1.09143115902246e-56	-1.03615	0.378	0.59	1.80631856818217e-52	0.icl2	Inpp5d
Eea1	1.15335273632185e-56	-1.63277	0.082	0.253	1.90879877861267e-52	0.icl2	Eea1
Tns3	2.2885085201512e-56	-5.07847	0.006	0.122	3.78748160085024e-52	0.icl2	Tns3
Srgap3	2.43130246506352e-56	-2.10559	0.069	0.228	4.02380557968012e-52	0.icl2	Srgap3
Myadm	2.87304185512134e-56	-4.78433	0.006	0.121	4.75488427022582e-52	0.icl2	Myadm
Clec12a	3.53259778083225e-56	-3.97455	0.013	0.134	5.84644932727738e-52	0.icl2	Clec12a
Ifi203	7.3392360939056e-56	0.727493	0.679	0.543	1.21464357354138e-51	0.icl2	Ifi203
Aldh2	8.55829655546836e-56	-2.38373	0.041	0.184	1.41639807993001e-51	0.icl2	Aldh2
Apoe	9.20079736177037e-56	-5.4036	0.026	0.156	1.522731963373e-51	0.icl2	Apoe
Rpl37	9.21534250075365e-56	0.292648	0.992	0.915	1.52513918387473e-51	0.icl2	Rpl37
Aak1	9.70494784848112e-56	0.728903	0.634	0.488	1.60616886892362e-51	0.icl2	Aak1
Aif1	1.02593052093866e-55	-5.63271	0.007	0.122	1.69791501215348e-51	0.icl2	Aif1
Cd28	1.28015448953136e-55	0.881448	0.462	0.287	2.1186556801744e-51	0.icl2	Cd28
Rpl22l1	1.60513802679173e-55	0.416113	0.922	0.81	2.65650343434031e-51	0.icl2	Rpl22l1
Cd300a	5.15831043092547e-55	-6.23144	0.002	0.111	8.53700376318165e-51	0.icl2	Cd300a
Rassf3	7.36190715900606e-55	-1.73067	0.178	0.366	1.2183956348155e-50	0.icl2	Rassf3
Tubb5	1.03032680080165e-54	0.584747	0.657	0.525	1.70519085532673e-50	0.icl2	Tubb5
Flt3	1.22496838037428e-54	-3.65967	0.018	0.142	2.02732266951944e-50	0.icl2	Flt3
Serpinb9	1.48808283307694e-54	-3.10363	0.04	0.178	2.46277708874233e-50	0.icl2	Serpinb9
Cytip	1.49075646303647e-54	0.439257	0.802	0.698	2.46720194632536e-50	0.icl2	Cytip
Kcnip3	2.14201170157868e-54	-5.68295	0.002	0.11	3.54502936611272e-50	0.icl2	Kcnip3
Trf	3.32086852414651e-54	-3.97765	0.007	0.12	5.49603740746248e-50	0.icl2	Trf
Klrb1b	3.70378998115368e-54	-7.72908	0	0.106	6.12977241880934e-50	0.icl2	Klrb1b
Fgd2	4.57316584936073e-54	-5.67722	0.005	0.115	7.56858948069201e-50	0.icl2	Fgd2
Prelid2	5.61264245627356e-54	-3.42991	0.013	0.132	9.28892326513274e-50	0.icl2	Prelid2
Ttn	6.53735783395627e-54	-7.401	0.007	0.118	1.08193272151976e-49	0.icl2	Ttn
Themis2	1.62715947491338e-53	-5.70477	0.004	0.112	2.69294893098165e-49	0.icl2	Themis2
Cd300lf	1.64410754349662e-53	-6.24805	0.002	0.109	2.72099798448691e-49	0.icl2	Cd300lf
Slfn5	2.28423303244788e-53	1.34393	0.328	0.18	3.78040566870125e-49	0.icl2	Slfn5
Cxcl16	2.3492060189311e-53	-6.03793	0.004	0.111	3.88793596133097e-49	0.icl2	Cxcl16
Bcl11a	2.63149478957038e-53	-5.56215	0.005	0.113	4.35512387673897e-49	0.icl2	Bcl11a
Vcl	3.35356883151418e-53	-2.1795	0.033	0.167	5.55015641615597e-49	0.icl2	Vcl
Stk17b	3.81260334595523e-53	0.438725	0.854	0.745	6.30985853755591e-49	0.icl2	Stk17b
Blnk	5.39097047226416e-53	-5.65156	0.004	0.111	8.92205613159718e-49	0.icl2	Blnk
Fam241a	7.59396936902131e-53	1.2695	0.328	0.184	1.25680193057303e-48	0.icl2	Fam241a
Sqstm1	7.8671134513227e-53	-1.00142	0.534	0.678	1.30200727619391e-48	0.icl2	Sqstm1
Nlk	9.91015030872878e-53	1.01979	0.458	0.318	1.64012987609461e-48	0.icl2	Nlk
Runx3	1.0455520683102e-52	0.740155	0.59	0.456	1.73038867305337e-48	0.icl2	Runx3
Rapgef4	1.17637553019187e-52	1.59286	0.229	0.099	1.94690150246755e-48	0.icl2	Rapgef4
Setbp1	1.61728085591053e-52	-1.69751	0.105	0.27	2.67659981653193e-48	0.icl2	Setbp1
Gpr137b	1.6980721748615e-52	-5.75006	0.003	0.108	2.81030944939579e-48	0.icl2	Gpr137b
Stim1	1.71009490017883e-52	0.789555	0.593	0.456	2.83020705979597e-48	0.icl2	Stim1
Hlf	2.43899680810256e-52	-5.30778	0.003	0.108	4.03653971740974e-48	0.icl2	Hlf
Rplp0	2.57525933070953e-52	0.297141	0.996	0.92	4.26205419232427e-48	0.icl2	Rplp0
Crlf3	2.63074388623825e-52	0.728822	0.644	0.543	4.3538811317243e-48	0.icl2	Crlf3
Mndal	3.10297351754057e-52	0.608041	0.716	0.601	5.13542117152964e-48	0.icl2	Mndal
Glp2r	3.60371714228437e-52	-6.93906	0.001	0.103	5.96415187048063e-48	0.icl2	Glp2r
Adcy7	3.83229437957278e-52	0.830621	0.527	0.398	6.34244719819295e-48	0.icl2	Adcy7
Cks2	3.87708586379572e-52	-2.12436	0.073	0.227	6.41657710458192e-48	0.icl2	Cks2
Plxnd1	4.3194573834903e-52	-6.29912	0.002	0.105	7.14870196967644e-48	0.icl2	Plxnd1
Cadm1	4.5329929182913e-52	-6.97013	0.002	0.105	7.50210327977211e-48	0.icl2	Cadm1
Prcp	4.674065712123e-52	-1.71067	0.066	0.22	7.73557875356356e-48	0.icl2	Prcp
Akap13	4.78631463176625e-52	0.386046	0.905	0.829	7.92135071557315e-48	0.icl2	Akap13
Il1b	5.84411181669841e-52	-7.37649	0.011	0.123	9.67200505663587e-48	0.icl2	Il1b
Stat5b	6.22065799921125e-52	0.797658	0.54	0.402	1.02951889886946e-47	0.icl2	Stat5b
Sptbn1	1.07276399784855e-51	0.783062	0.548	0.421	1.77542441643935e-47	0.icl2	Sptbn1
Ppp2r5a	1.0918835848652e-51	0.640113	0.635	0.531	1.80706733295191e-47	0.icl2	Ppp2r5a
Rpl37a	1.1720165660357e-51	0.279612	0.996	0.935	1.93968741678909e-47	0.icl2	Rpl37a
Bcl2a1a	1.25891683471179e-51	-6.98898	0.001	0.103	2.08350736144802e-47	0.icl2	Bcl2a1a
Evl	1.35228696331044e-51	0.671414	0.63	0.498	2.23803492427878e-47	0.icl2	Evl
Ankrd44	1.44286601634211e-51	0.431144	0.895	0.816	2.3879432570462e-47	0.icl2	Ankrd44
Ccrl2	1.48988690993002e-51	-3.6763	0.027	0.152	2.46576283593419e-47	0.icl2	Ccrl2
Grk5	1.91671252039757e-51	-2.21007	0.052	0.193	3.17215922125798e-47	0.icl2	Grk5
mt-Co1	2.05196048494659e-51	-0.91904	1	0.982	3.3959946025866e-47	0.icl2	mt-Co1
Rras2	2.32900333860215e-51	0.783643	0.51	0.356	3.85450052538657e-47	0.icl2	Rras2
Ehbp1l1	2.47432059571288e-51	-2.17073	0.043	0.181	4.09500058590481e-47	0.icl2	Ehbp1l1
Mthfsl	2.98386831351072e-51	-1.47322	0.071	0.228	4.93830205886024e-47	0.icl2	Mthfsl
Ppfibp2	3.10948863990593e-51	-5.59245	0.003	0.107	5.14620369904431e-47	0.icl2	Ppfibp2
Rpl6	3.59211442080388e-51	0.305445	0.993	0.905	5.94494936643043e-47	0.icl2	Rpl6
H2-DMb2	3.8661351875383e-51	-5.02034	0.006	0.111	6.39845373537588e-47	0.icl2	H2-DMb2
Furin	4.22828781104224e-51	-1.88885	0.084	0.24	6.9978163272749e-47	0.icl2	Furin
Lsp1	4.23497387127783e-51	-0.914042	0.622	0.74	7.0088817569648e-47	0.icl2	Lsp1
Rps11	6.41599342388051e-51	0.293366	0.994	0.909	1.06184691165223e-46	0.icl2	Rps11
Notch2	6.58159282016187e-51	-1.47658	0.144	0.324	1.08925361173679e-46	0.icl2	Notch2
Rasa4	6.59781910625452e-51	-4.08679	0.011	0.121	1.09193906208512e-46	0.icl2	Rasa4
Traf3ip3	7.45364368841011e-51	0.890631	0.465	0.329	1.23357803043187e-46	0.icl2	Traf3ip3
Rps6	1.36736349056115e-50	0.312996	0.989	0.884	2.2629865768787e-46	0.icl2	Rps6
Klra7	1.3676225076929e-50	-7.06696	0.004	0.106	2.26341525023175e-46	0.icl2	Klra7
Mcemp1	1.37255424863312e-50	-8.28942	0	0.099	2.27157728148781e-46	0.icl2	Mcemp1
Cd68	1.38247780836522e-50	-3.92367	0.007	0.112	2.28800077284443e-46	0.icl2	Cd68
Slc16a5	1.53235061686941e-50	3.61198	0.076	0.01	2.53604027091888e-46	0.icl2	Slc16a5
Tmem123	1.69302540634991e-50	-1.67759	0.239	0.438	2.8019570475091e-46	0.icl2	Tmem123
Fxyd5	2.1905664060404e-50	0.253928	0.934	0.792	3.62538740199687e-46	0.icl2	Fxyd5
Avpi1	2.82279361016077e-50	-2.6367	0.03	0.156	4.67172342481608e-46	0.icl2	Avpi1
Agap1	2.82388458673086e-50	-5.03169	0.007	0.111	4.67352899103958e-46	0.icl2	Agap1
Trim59	3.21176522777967e-50	1.59608	0.284	0.15	5.31547145197536e-46	0.icl2	Trim59
Lilrb4b	3.61794324181876e-50	-3.94665	0.017	0.131	5.98769606521005e-46	0.icl2	Lilrb4b
Runx2	4.05469150947423e-50	-1.47614	0.259	0.445	6.71051444817985e-46	0.icl2	Runx2
Swap70	4.98314124685585e-50	-2.01187	0.1	0.258	8.24709876354643e-46	0.icl2	Swap70
Kcnq5	5.25846205165853e-50	-1.49844	0.17	0.342	8.70275469549486e-46	0.icl2	Kcnq5
Sulf2	5.31857067128007e-50	-5.29259	0.003	0.103	8.80223446096852e-46	0.icl2	Sulf2
Scimp	5.40553582825682e-50	-4.024	0.008	0.114	8.94616179576504e-46	0.icl2	Scimp
Hgsnat	6.0979528767265e-50	-2.16412	0.051	0.189	1.00921120109823e-45	0.icl2	Hgsnat
Rasa3	7.67834363012703e-50	0.691347	0.571	0.435	1.27076587078602e-45	0.icl2	Rasa3
Gcnt1	7.84869182264833e-50	-7.1622	0.001	0.099	1.2989584966483e-45	0.icl2	Gcnt1
Dgat1	8.1296229297975e-50	-2.38954	0.068	0.211	1.34545259488149e-45	0.icl2	Dgat1
Gns	8.42592856372502e-50	-1.84401	0.08	0.232	1.39449117729649e-45	0.icl2	Gns
Arnt2	9.07926907551509e-50	-6.02402	0.001	0.1	1.50261903199775e-45	0.icl2	Arnt2
Gimap9	9.75162650471852e-50	0.938479	0.452	0.305	1.61389418653092e-45	0.icl2	Gimap9
Tgfbi	1.04382009626649e-49	-6.84915	0.001	0.099	1.72752225932104e-45	0.icl2	Tgfbi
Dad1	1.45144352047303e-49	0.450873	0.807	0.701	2.40213902638286e-45	0.icl2	Dad1
Slc28a2b	1.46945624568066e-49	2.28356	0.099	0.02	2.4319500866015e-45	0.icl2	Slc28a2b
Mctp1	1.72211434057545e-49	-2.98889	0.038	0.164	2.85009923365237e-45	0.icl2	Mctp1
Cd7	2.01941941400298e-49	-1.28867	0.223	0.401	3.34213913017493e-45	0.icl2	Cd7
Ctla2a	2.2234060443415e-49	-1.80517	0.151	0.31	3.67973700338518e-45	0.icl2	Ctla2a
Fuca1	2.5181449050221e-49	-1.47063	0.147	0.328	4.16752981781157e-45	0.icl2	Fuca1
Ifitm3	2.98577668304558e-49	-4.51565	0.021	0.135	4.94146041044043e-45	0.icl2	Ifitm3
Pard3b	3.64373393341283e-49	-5.76491	0.003	0.102	6.03037965979824e-45	0.icl2	Pard3b
Socs2	4.30736176958095e-49	-5.27769	0.005	0.105	7.12868372865647e-45	0.icl2	Socs2
Inpp4b	4.3682155550157e-49	0.231103	0.603	0.425	7.22939674355099e-45	0.icl2	Inpp4b
Atp6v0b	4.3926756796953e-49	-1.02489	0.27	0.48	7.26987824989573e-45	0.icl2	Atp6v0b
Ptprc	4.49103125749324e-49	0.261266	0.982	0.899	7.43265673115132e-45	0.icl2	Ptprc
Cyp27a1	5.05635380057886e-49	-7.06822	0.001	0.098	8.36826553995801e-45	0.icl2	Cyp27a1
Itgam	5.81718578098459e-49	-6.32895	0.002	0.099	9.6274424675295e-45	0.icl2	Itgam
Hivep2	5.86425478174908e-49	0.506116	0.695	0.541	9.70534166379473e-45	0.icl2	Hivep2
Nfkbid	7.49435501866361e-49	-1.61375	0.115	0.28	1.24031575558883e-44	0.icl2	Nfkbid
Zfp462	8.22230814488831e-49	-5.87808	0.002	0.099	1.36079199797902e-44	0.icl2	Zfp462
Kdm2b	8.86893868393118e-49	-1.50664	0.209	0.389	1.46780935219061e-44	0.icl2	Kdm2b
Pbx3	1.13336628283401e-48	-2.42286	0.028	0.149	1.87572119809029e-44	0.icl2	Pbx3
Slc41a2	1.15481511151921e-48	-5.17633	0.005	0.105	1.91121900956429e-44	0.icl2	Slc41a2
Unc119	1.59927889471453e-48	-1.24469	0.102	0.269	2.64680657075255e-44	0.icl2	Unc119
Tmem64	1.93547863299718e-48	-1.70838	0.092	0.245	3.20321713761034e-44	0.icl2	Tmem64
Il12rb2	2.09520772631455e-48	-2.46041	0.055	0.19	3.46756878705059e-44	0.icl2	Il12rb2
Ltb4r1	2.40278729151955e-48	-6.09081	0.001	0.097	3.97661296746485e-44	0.icl2	Ltb4r1
Fabp5	2.79397246242939e-48	-4.02967	0.027	0.145	4.62402442532064e-44	0.icl2	Fabp5
Grina	2.9353945374437e-48	-2.09543	0.07	0.215	4.85807795946932e-44	0.icl2	Grina
Eef1b2	3.12495347571473e-48	0.269622	0.978	0.868	5.17179800230789e-44	0.icl2	Eef1b2
Pdk1	3.22209908138108e-48	1.4571	0.268	0.139	5.33257397968569e-44	0.icl2	Pdk1
Man1c1	3.65234497535109e-48	-3.02767	0.016	0.127	6.04463093420605e-44	0.icl2	Man1c1
Cd40	3.89436261444115e-48	-8.11942	0	0.094	6.44517012690011e-44	0.icl2	Cd40
Ly6c1	4.03242445286688e-48	4.41695	0.067	0.007	6.67366246949469e-44	0.icl2	Ly6c1
Nedd4	4.79604150788191e-48	-1.47988	0.139	0.313	7.93744869554456e-44	0.icl2	Nedd4
Rpl34	4.96750568014191e-48	0.280466	0.994	0.909	8.22122190063485e-44	0.icl2	Rpl34
Xylt1	5.03559149836991e-48	-1.89242	0.147	0.313	8.33390392980221e-44	0.icl2	Xylt1
Pip5k1b	5.11189058613162e-48	-1.55744	0.092	0.247	8.46017892004784e-44	0.icl2	Pip5k1b
Gm2a	5.78350781864469e-48	-1.38281	0.209	0.386	9.57170543985696e-44	0.icl2	Gm2a
Pdgfb	8.84528846835773e-48	-4.15411	0.006	0.105	1.4638952415132e-43	0.icl2	Pdgfb
Fosb	1.01430758273895e-47	-1.02958	0.496	0.64	1.67867904943296e-43	0.icl2	Fosb
Snap23	1.21407046795503e-47	-1.60593	0.109	0.273	2.00928662446558e-43	0.icl2	Snap23
Cobll1	1.21703938556251e-47	-1.143	0.118	0.285	2.01420018310596e-43	0.icl2	Cobll1
Maf	1.29368323553088e-47	-1.55902	0.113	0.268	2.14104575480361e-43	0.icl2	Maf
Ier5	1.35371185874874e-47	-0.698096	0.515	0.699	2.24039312622916e-43	0.icl2	Ier5
Marcksl1	1.76714815494644e-47	-3.16838	0.035	0.157	2.92463019643635e-43	0.icl2	Marcksl1
Il1r2	1.9691268858704e-47	-7.35628	0.005	0.102	3.25890499611551e-43	0.icl2	Il1r2
Dock11	2.35750243427633e-47	0.632851	0.648	0.541	3.90166652872732e-43	0.icl2	Dock11
Cacna1e	2.68787447265805e-47	-5.77136	0.006	0.103	4.44843225224907e-43	0.icl2	Cacna1e
Pstpip2	3.0401583582599e-47	-6.28785	0.001	0.095	5.03146208292013e-43	0.icl2	Pstpip2
Rrbp1	3.04334412608981e-47	-1.15706	0.275	0.473	5.03673452867863e-43	0.icl2	Rrbp1
Cd86	3.06148738163133e-47	-2.90261	0.047	0.174	5.06676161659986e-43	0.icl2	Cd86
Igsf6	3.35558992846684e-47	-5.96116	0.002	0.097	5.55350133161263e-43	0.icl2	Igsf6
Naip2	3.45562992211712e-47	-4.42484	0.004	0.101	5.71906752110384e-43	0.icl2	Naip2
Itpkb	3.69066335056832e-47	0.600725	0.606	0.475	6.10804784519057e-43	0.icl2	Itpkb
Nrp1	3.97585665783835e-47	-3.98612	0.006	0.105	6.58004276872246e-43	0.icl2	Nrp1
Farp1	4.23407890821032e-47	-2.0014	0.043	0.171	7.00740059308809e-43	0.icl2	Farp1
Lrrc25	4.31546292309571e-47	-5.89846	0.001	0.095	7.14209113772339e-43	0.icl2	Lrrc25
Btk	4.54737415852194e-47	-5.1581	0.002	0.096	7.52590423235382e-43	0.icl2	Btk
Fcgr3	5.16112918700121e-47	-4.97607	0.005	0.102	8.541668804487e-43	0.icl2	Fcgr3
Clec7a	5.8245762321587e-47	-5.7971	0.003	0.098	9.63967366422265e-43	0.icl2	Clec7a
Iigp1	5.83135118189853e-47	2.26582	0.116	0.031	9.65088620604207e-43	0.icl2	Iigp1
Lbh	6.40896714356884e-47	0.795805	0.525	0.411	1.06068406226064e-42	0.icl2	Lbh
Tmtc2	7.26904144110441e-47	-2.60023	0.058	0.192	1.20302635850278e-42	0.icl2	Tmtc2
Plscr1	1.01786239533573e-46	-2.4732	0.036	0.158	1.68456226428063e-42	0.icl2	Plscr1
Cntn1	1.16817662274954e-46	-7.80835	0.001	0.094	1.93333231065048e-42	0.icl2	Cntn1
Lgmn	1.21093328607245e-46	-4.31402	0.008	0.107	2.00409458844991e-42	0.icl2	Lgmn
Nfam1	1.22013366562485e-46	-3.50036	0.019	0.128	2.01932121660912e-42	0.icl2	Nfam1
Cd80	1.30896470958798e-46	-4.8607	0.007	0.106	2.16633659436811e-42	0.icl2	Cd80
Pglyrp2	1.55065681838364e-46	1.37547	0.299	0.17	2.56633703442492e-42	0.icl2	Pglyrp2
Nudt4	1.59833728469832e-46	-1.63646	0.078	0.226	2.64524820617572e-42	0.icl2	Nudt4
Psmb8	1.66397802834572e-46	0.42091	0.874	0.781	2.75388363691217e-42	0.icl2	Psmb8
Znrf2	1.92678586119884e-46	0.742665	0.57	0.457	3.18883060028408e-42	0.icl2	Znrf2
Plin2	1.99544435172416e-46	-2.30837	0.042	0.168	3.30246040210348e-42	0.icl2	Plin2
Hdac4	2.13042056568139e-46	0.936472	0.414	0.278	3.5258460362027e-42	0.icl2	Hdac4
Trps1	2.38696704245479e-46	-1.26313	0.314	0.493	3.95043045526268e-42	0.icl2	Trps1
Zfp516	2.39029170183383e-46	-2.33249	0.04	0.166	3.95593276653498e-42	0.icl2	Zfp516
Hsp90b1	2.92134314528373e-46	-0.905596	0.511	0.662	4.83482290544458e-42	0.icl2	Hsp90b1
Smox	3.54287841133294e-46	-2.08786	0.055	0.188	5.86346377075601e-42	0.icl2	Smox
Ptpro	4.0903069744433e-46	-5.87354	0.002	0.094	6.76945804270366e-42	0.icl2	Ptpro
Rubcnl	4.23769934472803e-46	-4.94608	0.003	0.097	7.01339241552488e-42	0.icl2	Rubcnl
Pmepa1	4.35046659358456e-46	1.26744	0.254	0.126	7.20002221238245e-42	0.icl2	Pmepa1
Runx1	4.85020395219191e-46	-0.932982	0.516	0.663	8.0270875408776e-42	0.icl2	Runx1
Lysmd2	5.38999865968807e-46	-2.64327	0.019	0.129	8.92044778178376e-42	0.icl2	Lysmd2
Rnd3	5.80349159646529e-46	-4.89261	0.003	0.096	9.60477859215005e-42	0.icl2	Rnd3
Lmnb1	6.65801070157964e-46	-2.55967	0.099	0.249	1.10190077111143e-41	0.icl2	Lmnb1
Lrrk2	6.90298770994211e-46	-5.58472	0.004	0.098	1.14244446599542e-41	0.icl2	Lrrk2
Camk2n1	7.64757821944236e-46	-5.45277	0.002	0.094	1.26567419531771e-41	0.icl2	Camk2n1
Stx7	8.79050752640391e-46	-1.39808	0.102	0.259	1.45482899561985e-41	0.icl2	Stx7
Pik3cb	9.7185458670681e-46	-2.33001	0.05	0.179	1.60841934099977e-41	0.icl2	Pik3cb
Vegfa	9.78367823042917e-46	-4.62563	0.013	0.115	1.61919874713603e-41	0.icl2	Vegfa
Serp1	1.02637584465657e-45	-0.995872	0.288	0.477	1.69865202290663e-41	0.icl2	Serp1
Maml3	1.15913270453146e-45	0.765156	0.411	0.256	1.91836462599956e-41	0.icl2	Maml3
Sesn3	1.2461164487853e-45	0.922604	0.508	0.39	2.06232272273967e-41	0.icl2	Sesn3
Arhgap17	1.29931135827078e-45	-1.08958	0.239	0.428	2.15036029793814e-41	0.icl2	Arhgap17
Kcnk1	1.32391925805408e-45	-8.97757	0	0.089	2.19108637207951e-41	0.icl2	Kcnk1
Sdf2l1	1.33548466665324e-45	-1.35361	0.084	0.235	2.21022712331112e-41	0.icl2	Sdf2l1
Carmil1	1.34471712381118e-45	-5.55607	0.002	0.094	2.2255068399075e-41	0.icl2	Carmil1
Adap1	1.65576131008673e-45	-4.30047	0.009	0.108	2.74028496819354e-41	0.icl2	Adap1
Rps2	1.71276690650847e-45	0.277611	0.992	0.886	2.83462923027151e-41	0.icl2	Rps2
Ccl4	1.82381131854789e-45	-3.27555	0.05	0.175	3.01840773219676e-41	0.icl2	Ccl4
Tnfrsf9	1.85162771885267e-45	-2.28732	0.046	0.171	3.06444387470117e-41	0.icl2	Tnfrsf9
Txn1	2.13496405303177e-45	-1.22614	0.472	0.644	3.53336550776758e-41	0.icl2	Txn1
Septin1	2.16234229487232e-45	0.528163	0.724	0.606	3.57867649801369e-41	0.icl2	Septin1
Itgb7	2.32335130618163e-45	0.533115	0.641	0.496	3.8451464117306e-41	0.icl2	Itgb7
Tpi1	2.68802710652339e-45	-1.09723	0.118	0.284	4.44868486129621e-41	0.icl2	Tpi1
Ssh2	2.86393573072489e-45	0.527089	0.749	0.638	4.73981363434969e-41	0.icl2	Ssh2
Tnrc6c	3.60319517198002e-45	0.601447	0.606	0.499	5.96328800962694e-41	0.icl2	Tnrc6c
Eya1	3.89666805283667e-45	-4.80116	0.003	0.095	6.44898562744469e-41	0.icl2	Eya1
Mt1	4.83416282356381e-45	-4.42267	0.01	0.108	8.00053947299811e-41	0.icl2	Mt1
Arhgap26	4.94617524822807e-45	-0.826676	0.433	0.611	8.18592003581746e-41	0.icl2	Arhgap26
Dipk1a	5.21921143279994e-45	0.90474	0.468	0.345	8.6377949212839e-41	0.icl2	Dipk1a
Lypd6b	7.48079401573533e-45	2.06199	0.125	0.037	1.2380714096042e-40	0.icl2	Lypd6b
Rpl18a	1.09683403642424e-44	0.26884	0.997	0.927	1.81526033028211e-40	0.icl2	Rpl18a
Lrrfip2	1.1207788739499e-44	-1.20608	0.128	0.294	1.85488903638709e-40	0.icl2	Lrrfip2
Rasgrp1	1.19146233383862e-44	0.810022	0.489	0.354	1.97187016250291e-40	0.icl2	Rasgrp1
Pak1	1.89288600689224e-44	-3.34704	0.023	0.13	3.13272634140666e-40	0.icl2	Pak1
Galnt6	2.09092400568774e-44	1.2526	0.299	0.172	3.46047922941321e-40	0.icl2	Galnt6
Hopx	2.34282152524531e-44	-1.37547	0.111	0.263	3.87736962428099e-40	0.icl2	Hopx
Bcl2l11	2.62567660450048e-44	-1.38427	0.155	0.321	4.3454947804483e-40	0.icl2	Bcl2l11
Prdx4	2.7516981625211e-44	-2.76003	0.014	0.115	4.55406045897242e-40	0.icl2	Prdx4
Tshz3	3.57410354295945e-44	-1.78192	0.046	0.171	5.91514136359789e-40	0.icl2	Tshz3
Arl6ip5	4.27847561293327e-44	0.509202	0.718	0.619	7.08087713940457e-40	0.icl2	Arl6ip5
BC028528	4.82027151534531e-44	-6.87993	0	0.087	7.97754935789649e-40	0.icl2	BC028528
Cyp4f16	4.95159081711784e-44	-3.19781	0.012	0.112	8.19488280233003e-40	0.icl2	Cyp4f16
Mxd1	9.30017724534472e-44	-1.74018	0.179	0.341	1.53917933410455e-39	0.icl2	Mxd1
Fasl	9.90945085153641e-44	-3.73773	0.009	0.104	1.64001411592928e-39	0.icl2	Fasl
Cnr2	9.93790431099376e-44	-2.51712	0.028	0.139	1.64472316346947e-39	0.icl2	Cnr2
Rpl13	1.09697681569758e-43	0.262974	0.999	0.939	1.81549662997949e-39	0.icl2	Rpl13
Xkr6	1.13012150387632e-43	-5.4538	0.001	0.088	1.87035108891531e-39	0.icl2	Xkr6
Il4i1	1.54214953755275e-43	-5.17206	0.007	0.099	2.55225748464979e-39	0.icl2	Il4i1
Emilin2	1.95037099641004e-43	-6.893	0.001	0.088	3.22786399905861e-39	0.icl2	Emilin2
Daam1	2.33824529753745e-43	-2.02924	0.061	0.191	3.86979596742449e-39	0.icl2	Daam1
Cish	2.39094449633166e-43	-2.35643	0.027	0.137	3.9570131414289e-39	0.icl2	Cish
Asap2	2.64757202160593e-43	-2.99401	0.023	0.13	4.38173169575782e-39	0.icl2	Asap2
Zfhx3	2.68754022008658e-43	-2.16546	0.031	0.144	4.44787906424329e-39	0.icl2	Zfhx3
Nfkbie	2.75454547240352e-43	-1.49322	0.15	0.318	4.55877275682783e-39	0.icl2	Nfkbie
BC035044	3.11456739438034e-43	-1.87473	0.031	0.143	5.15460903769946e-39	0.icl2	BC035044
Setx	3.79417681802252e-43	0.848104	0.436	0.311	6.27936263382728e-39	0.icl2	Setx
Map4k4	4.20871800075907e-43	0.436286	0.673	0.576	6.96542829125625e-39	0.icl2	Map4k4
Maff	4.24529652430598e-43	-2.62604	0.032	0.144	7.0259657477264e-39	0.icl2	Maff
Septin11	4.54466491671524e-43	-0.91055	0.258	0.447	7.52142043716372e-39	0.icl2	Septin11
Rpl26	4.70452942174843e-43	0.259614	0.994	0.92	7.78599619299365e-39	0.icl2	Rpl26
Ppfia4	5.96338826527951e-43	-6.92077	0	0.085	9.86940757903759e-39	0.icl2	Ppfia4
Cdc42bpb	6.12101426568165e-43	-6.52233	0	0.085	1.01302786097031e-38	0.icl2	Cdc42bpb
Crybg1	7.7694416691169e-43	-1.47476	0.101	0.248	1.28584259623885e-38	0.icl2	Crybg1
Zfp292	8.73624383755032e-43	0.624516	0.595	0.492	1.44584835511458e-38	0.icl2	Zfp292
Nek6	1.05992328451352e-42	-5.3345	0.002	0.088	1.75417303586988e-38	0.icl2	Nek6
Atp6v0a1	1.08821278439207e-42	-2.60635	0.018	0.12	1.80099215816888e-38	0.icl2	Atp6v0a1
Nedd9	1.08864361877231e-42	0.51678	0.638	0.517	1.80170518906818e-38	0.icl2	Nedd9
Tmem51	1.20022867469648e-42	-4.94059	0.004	0.092	1.98637845662267e-38	0.icl2	Tmem51
Ncf4	1.76336824190224e-42	-1.23031	0.137	0.299	2.91837444034821e-38	0.icl2	Ncf4
Dnase1l3	1.94226939647571e-42	-5.01301	0.004	0.091	3.21445585116731e-38	0.icl2	Dnase1l3
Gna15	1.96210958902596e-42	-1.88051	0.033	0.148	3.24729136983796e-38	0.icl2	Gna15
Ccnd1	2.2011225994051e-42	-3.99544	0.009	0.101	3.64285790201544e-38	0.icl2	Ccnd1
Cd63	2.39783400968867e-42	-5.86047	0.004	0.091	3.96841528603475e-38	0.icl2	Cd63
Rnf157	3.52386230366471e-42	-1.73851	0.095	0.237	5.8319921125651e-38	0.icl2	Rnf157
Syne2	4.13207283537871e-42	-1.99517	0.039	0.156	6.83858054255176e-38	0.icl2	Syne2
N4bp1	5.6965139188159e-42	-1.46135	0.1	0.247	9.42773053564032e-38	0.icl2	N4bp1
Il13ra1	7.53021958236978e-42	-6.4027	0.001	0.084	1.2462513408822e-37	0.icl2	Il13ra1
Fcgr2b	9.99778091097514e-42	-5.96428	0.001	0.084	1.65463274076639e-37	0.icl2	Fcgr2b
Tnfsf14	1.0807153553845e-41	-2.99501	0.013	0.108	1.78858391316135e-37	0.icl2	Tnfsf14
Trim7	1.17458530896668e-41	-6.74797	0.001	0.084	1.94393868633986e-37	0.icl2	Trim7
Rpl32	1.18236636691425e-41	0.255444	0.994	0.911	1.95681633724308e-37	0.icl2	Rpl32
Dnah8	1.26990953421862e-41	1.55685	0.206	0.096	2.10170027913182e-37	0.icl2	Dnah8
Anxa3	1.30823976056645e-41	-5.90237	0.005	0.091	2.16513680373747e-37	0.icl2	Anxa3
Srpk2	1.46339088292669e-41	0.664278	0.593	0.491	2.42191191124368e-37	0.icl2	Srpk2
Bri3	1.56969370908974e-41	-0.952348	0.282	0.468	2.59784308854352e-37	0.icl2	Bri3
Tnrc6b	2.19117856845385e-41	0.39963	0.807	0.723	3.62640053079112e-37	0.icl2	Tnrc6b
Ccl6	2.48675603518594e-41	-7.59862	0.002	0.085	4.11558123823272e-37	0.icl2	Ccl6
Dgkh	2.66015833229303e-41	-2.99164	0.022	0.124	4.40256203994497e-37	0.icl2	Dgkh
Eef1g	3.7718812432684e-41	0.439165	0.823	0.721	6.2424634576092e-37	0.icl2	Eef1g
Creg1	3.79329874852182e-41	-1.22959	0.114	0.268	6.27790942880361e-37	0.icl2	Creg1
Klrb1a	3.82877188298902e-41	-8.1621	0	0.081	6.33661746634683e-37	0.icl2	Klrb1a
Mapre2	3.90876710299192e-41	-0.870271	0.276	0.468	6.46900955545162e-37	0.icl2	Mapre2
Ccser1	4.12144231012656e-41	-6.92545	0.002	0.085	6.82098702325945e-37	0.icl2	Ccser1
Slc44a1	4.2658190548263e-41	-2.00332	0.043	0.161	7.05993053573752e-37	0.icl2	Slc44a1
Rbpj	5.01315688070522e-41	-1.53765	0.156	0.317	8.29677463756713e-37	0.icl2	Rbpj
Fkbp3	5.48187373615761e-41	0.620732	0.602	0.506	9.07250103334084e-37	0.icl2	Fkbp3
Pdcd4	5.80332960362385e-41	0.501392	0.766	0.666	9.60451049399747e-37	0.icl2	Pdcd4
Snrpe	6.07082379563054e-41	0.429733	0.794	0.704	1.00472133817685e-36	0.icl2	Snrpe
Vav2	6.42734754022293e-41	-2.77741	0.024	0.127	1.0637260179069e-36	0.icl2	Vav2
Cysltr1	8.84855593362598e-41	-5.78377	0.002	0.084	1.4644360070151e-36	0.icl2	Cysltr1
Sdc1	8.97128677064795e-41	-6.84785	0	0.08	1.48474796054224e-36	0.icl2	Sdc1
Cd96	9.08258326883235e-41	1.05317	0.39	0.268	1.50316753099175e-36	0.icl2	Cd96
Tnfrsf11a	1.10521182740627e-40	-6.93575	0.001	0.081	1.82912557435737e-36	0.icl2	Tnfrsf11a
C9orf72	1.12444063928666e-40	-2.31844	0.04	0.153	1.86094925801942e-36	0.icl2	C9orf72
Jdp2	1.38016733302358e-40	-4.60715	0.008	0.096	2.28417693615403e-36	0.icl2	Jdp2
Chsy1	1.50934305305012e-40	-1.27837	0.158	0.314	2.49796275279795e-36	0.icl2	Chsy1
Lmo2	1.51355155605538e-40	-4.71464	0.003	0.086	2.50492782527165e-36	0.icl2	Lmo2
Sptssa	1.98538943033112e-40	-1.16765	0.316	0.489	3.285819507198e-36	0.icl2	Sptssa
Pard3	2.44784240131877e-40	-5.70559	0.002	0.083	4.05117917418257e-36	0.icl2	Pard3
Dap	2.7618978211304e-40	-0.956448	0.208	0.385	4.57094089397082e-36	0.icl2	Dap
Csf3r	2.99895741501484e-40	-7.59866	0.003	0.084	4.96327452184957e-36	0.icl2	Csf3r
Stat1	3.10805282804559e-40	0.828551	0.501	0.389	5.14382743041546e-36	0.icl2	Stat1
Cask	3.1312733796167e-40	-2.32632	0.049	0.167	5.18225744326563e-36	0.icl2	Cask
Arhgap31	3.93712809061489e-40	-1.64013	0.179	0.332	6.51594698996764e-36	0.icl2	Arhgap31
Reep5	4.13115174673521e-40	-0.698014	0.396	0.582	6.83705614084677e-36	0.icl2	Reep5
Cacnb2	4.72503467456463e-40	-5.02472	0.003	0.085	7.81993238640446e-36	0.icl2	Cacnb2
Bcl2l1	4.90776326858792e-40	-1.98422	0.041	0.154	8.122348209513e-36	0.icl2	Bcl2l1
Myl12a	5.20730696648068e-40	0.513214	0.723	0.639	8.61809302952553e-36	0.icl2	Myl12a
Adam19	5.65657547421135e-40	-1.81122	0.084	0.218	9.36163240981978e-36	0.icl2	Adam19
Klra8	6.36725757792438e-40	-6.96802	0.004	0.087	1.05378112914648e-35	0.icl2	Klra8
Sema6d	6.754623650983e-40	-5.38108	0.004	0.086	1.11789021423769e-35	0.icl2	Sema6d
Tiam1	7.1615021623266e-40	-1.66732	0.062	0.187	1.18522860786505e-35	0.icl2	Tiam1
Lilrb4a	7.62398517126143e-40	-4.2925	0.008	0.094	1.26176954584377e-35	0.icl2	Lilrb4a
Zdhhc15	7.87138353463746e-40	1.56961	0.202	0.095	1.3027139749825e-35	0.icl2	Zdhhc15
Crybg3	9.04887101436786e-40	-3.65028	0.01	0.099	1.49758815287788e-35	0.icl2	Crybg3
Calcrl	9.20744511273006e-40	1.17028	0.325	0.199	1.52383216615683e-35	0.icl2	Calcrl
Slc7a11	9.56044266657924e-40	-7.76203	0.001	0.08	1.58225326131886e-35	0.icl2	Slc7a11
Csf2rb2	1.41147152824777e-39	-6.86034	0	0.078	2.33598537925006e-35	0.icl2	Csf2rb2
Map4k5	1.53043368952956e-39	-2.65157	0.019	0.116	2.53286775617142e-35	0.icl2	Map4k5
Dapk2	1.69698931173547e-39	-3.99323	0.006	0.09	2.80851731092221e-35	0.icl2	Dapk2
Cd52	1.71209961745736e-39	0.254261	0.985	0.894	2.83352486689193e-35	0.icl2	Cd52
Nrgn	2.17786330569944e-39	-4.00828	0.013	0.102	3.60436377093258e-35	0.icl2	Nrgn
Rasal2	4.06944370209026e-39	-3.824	0.015	0.106	6.73492932695938e-35	0.icl2	Rasal2
Patj	4.34459435558062e-39	1.30683	0.241	0.128	7.19030365848593e-35	0.icl2	Patj
F2r	4.45945977840701e-39	-1.78033	0.058	0.178	7.3804059332636e-35	0.icl2	F2r
Gimap5	4.79243414250805e-39	0.613725	0.521	0.381	7.93147850585082e-35	0.icl2	Gimap5
Cebpd	5.1238894946996e-39	-4.7849	0.007	0.091	8.48003711372784e-35	0.icl2	Cebpd
Rpl13a	5.15625429892875e-39	0.522892	0.738	0.66	8.53360086472708e-35	0.icl2	Rpl13a
Hivep1	5.21589205639679e-39	-1.26804	0.176	0.336	8.63230135333669e-35	0.icl2	Hivep1
Cyp4f18	5.50478438091693e-39	-5.96077	0.002	0.081	9.11041815041752e-35	0.icl2	Cyp4f18
Gzmb	5.70210104985617e-39	-5.4003	0.008	0.093	9.43697723751195e-35	0.icl2	Gzmb
Gpr141	5.79521380996616e-39	-6.20418	0.002	0.08	9.59107885549399e-35	0.icl2	Gpr141
Egr1	7.0736154823455e-39	-1.16705	0.272	0.429	1.17068336232818e-34	0.icl2	Egr1
Arl4d	1.09005471284442e-38	-2.828	0.017	0.11	1.80404054975751e-34	0.icl2	Arl4d
Msi2	1.12222585994851e-38	0.479153	0.677	0.586	1.85728379821479e-34	0.icl2	Msi2
Siglecg	1.12440693673602e-38	-5.03686	0.003	0.082	1.86089348029811e-34	0.icl2	Siglecg
Cyb561a3	1.14642948446704e-38	-2.27968	0.036	0.142	1.89734079679294e-34	0.icl2	Cyb561a3
Bach2	1.32271292090762e-38	0.277779	0.732	0.572	2.18908988410211e-34	0.icl2	Bach2
Rasal3	1.36679465551131e-38	0.919776	0.403	0.287	2.26204515487122e-34	0.icl2	Rasal3
Asph	1.57713838628176e-38	-3.22926	0.013	0.102	2.61016402929632e-34	0.icl2	Asph
Syne3	2.21867447742428e-38	-2.61322	0.014	0.103	3.67190626013718e-34	0.icl2	Syne3
S100a1	2.41725461586384e-38	-4.08527	0.004	0.084	4.00055638925465e-34	0.icl2	S100a1
Gda	2.53625601836778e-38	-9.02149	0	0.076	4.19750371039868e-34	0.icl2	Gda
Tgtp2	2.55615526538002e-38	2.12806	0.127	0.044	4.23043696420393e-34	0.icl2	Tgtp2
Camk1d	2.87242676430417e-38	-1.06372	0.868	0.929	4.75386629492341e-34	0.icl2	Camk1d
Lsm4	2.95616905167173e-38	0.590116	0.632	0.555	4.89245978051672e-34	0.icl2	Lsm4
Bmyc	3.30488018385874e-38	-1.16979	0.065	0.192	5.46957670428622e-34	0.icl2	Bmyc
Pde7b	3.4625771591922e-38	-4.97002	0.004	0.084	5.73056519846309e-34	0.icl2	Pde7b
Pla2g7	3.50424188116288e-38	-6.99184	0.002	0.079	5.79952031332456e-34	0.icl2	Pla2g7
Oprm1	3.93181557925064e-38	1.16873	0.278	0.159	6.50715478365981e-34	0.icl2	Oprm1
Rpsa	4.27009537789738e-38	0.238128	0.998	0.94	7.06700785042017e-34	0.icl2	Rpsa
Mettl23	4.53592841144058e-38	0.751867	0.529	0.443	7.50696152093416e-34	0.icl2	Mettl23
Art4	4.9115916709539e-38	2.858	0.084	0.02	8.1286842154287e-34	0.icl2	Art4
Mettl8	4.91857449734551e-38	1.7353	0.171	0.075	8.14024079310682e-34	0.icl2	Mettl8
Nuak2	5.24110663384434e-38	-2.8029	0.032	0.135	8.67403147901239e-34	0.icl2	Nuak2
Rab8b	5.37973922467373e-38	-0.868507	0.514	0.66	8.90346841683503e-34	0.icl2	Rab8b
Sgpl1	5.67031735174078e-38	-1.42683	0.095	0.233	9.38437521713099e-34	0.icl2	Sgpl1
Phf20l1	6.13815428793862e-38	0.599224	0.649	0.57	1.01586453465384e-33	0.icl2	Phf20l1
Asah1	6.69685532308244e-38	-1.59627	0.063	0.186	1.10832955597014e-33	0.icl2	Asah1
Itsn1	6.82061524960929e-38	-2.43885	0.018	0.111	1.12881182381034e-33	0.icl2	Itsn1
Stk10	1.08977798635286e-37	0.575055	0.593	0.488	1.80358256741398e-33	0.icl2	Stk10
Fam172a	1.23332120801661e-37	0.53704	0.702	0.626	2.04114659926748e-33	0.icl2	Fam172a
Pim3	1.65936361567789e-37	-2.32977	0.039	0.145	2.7462467839469e-33	0.icl2	Pim3
Apobec1	1.72077924922192e-37	-2.05654	0.066	0.185	2.84788965746228e-33	0.icl2	Apobec1
Slc17a9	1.90236897806646e-37	1.74498	0.189	0.091	3.14842065869999e-33	0.icl2	Slc17a9
Tgfb1	1.96069964750027e-37	-1.00059	0.229	0.401	3.24495791661294e-33	0.icl2	Tgfb1
Havcr2	2.00274882987321e-37	-7.01815	0.001	0.075	3.31454931344016e-33	0.icl2	Havcr2
Hnrnpa0	2.05516634812296e-37	0.453842	0.776	0.711	3.4013003061435e-33	0.icl2	Hnrnpa0
Icosl	2.48895924787134e-37	-3.05767	0.021	0.114	4.11922755522707e-33	0.icl2	Icosl
Gm21188	2.62992514815446e-37	-4.61471	0.005	0.084	4.35252612019563e-33	0.icl2	Gm21188
Irak3	2.741396980359e-37	-3.0964	0.011	0.097	4.53701200249414e-33	0.icl2	Irak3
Rgs2	3.1855100564999e-37	-0.861002	0.367	0.538	5.27201914350734e-33	0.icl2	Rgs2
Rin3	3.98419438698886e-37	-1.00834	0.159	0.317	6.59384171046656e-33	0.icl2	Rin3
Rflnb	4.19701121574396e-37	1.74285	0.165	0.071	6.94605356205625e-33	0.icl2	Rflnb
Irs2	4.22254351046878e-37	-1.56169	0.086	0.213	6.98830950982583e-33	0.icl2	Irs2
Slc22a15	4.65695904459753e-37	-4.08909	0.005	0.084	7.70726721880891e-33	0.icl2	Slc22a15
Eif4ebp1	4.94128740829719e-37	-1.89826	0.028	0.127	8.17783066073184e-33	0.icl2	Eif4ebp1
Clcn3	5.42312451083301e-37	-0.966948	0.287	0.456	8.97527106542864e-33	0.icl2	Clcn3
Zfp366	6.03946242165865e-37	-6.12258	0.002	0.077	9.99531030784506e-33	0.icl2	Zfp366
Zbp1	6.17868050552229e-37	1.24814	0.303	0.188	1.02257162366394e-32	0.icl2	Zbp1
Tiam2	6.65005310687446e-37	-4.04968	0.006	0.084	1.10058378918772e-32	0.icl2	Tiam2
Atrnl1	6.86551730008506e-37	-1.56467	0.134	0.273	1.13624311316408e-32	0.icl2	Atrnl1
Prkd2	7.04001092685351e-37	1.16686	0.296	0.183	1.16512180839426e-32	0.icl2	Prkd2
Rps27l	7.24284265840927e-37	-0.794254	0.273	0.45	1.19869045996673e-32	0.icl2	Rps27l
Sh3glb1	7.36594957153087e-37	-0.721796	0.418	0.598	1.21906465408836e-32	0.icl2	Sh3glb1
Dok3	8.16162408316454e-37	-4.40507	0.004	0.081	1.35074878576373e-32	0.icl2	Dok3
Mvp	9.06395503417207e-37	-1.78305	0.044	0.153	1.50008455815548e-32	0.icl2	Mvp
Hpcal1	1.19182318748228e-36	0.828511	0.437	0.328	1.97246737528317e-32	0.icl2	Hpcal1
Cdc42ep3	1.19891213271716e-36	-0.97311	0.212	0.378	1.9841995796469e-32	0.icl2	Cdc42ep3
Pdcd1lg2	1.29593251842352e-36	-1.83472	0.042	0.149	2.14476831799092e-32	0.icl2	Pdcd1lg2
Swt1	1.3001108776307e-36	0.823129	0.466	0.361	2.15168350247881e-32	0.icl2	Swt1
Apobr	1.31763157677081e-36	-2.35187	0.023	0.118	2.18068025955569e-32	0.icl2	Apobr
Rab30	1.31832294782135e-36	-4.7816	0.004	0.08	2.18182447864433e-32	0.icl2	Rab30
I830077J02Rik	1.51261858490571e-36	-5.74372	0.001	0.074	2.50338375801895e-32	0.icl2	I830077J02Rik
Slc12a7	1.52157239492547e-36	1.18893	0.295	0.18	2.51820231360165e-32	0.icl2	Slc12a7
Rpl27	1.5480487858426e-36	0.250875	0.992	0.905	2.5620207405695e-32	0.icl2	Rpl27
Septin8	1.62976491968008e-36	-3.95859	0.005	0.083	2.69726094207053e-32	0.icl2	Septin8
Trim36	1.64147643628506e-36	-1.96481	0.026	0.123	2.71664350205177e-32	0.icl2	Trim36
Tfeb	1.74613440601728e-36	-1.63134	0.045	0.155	2.88985244195861e-32	0.icl2	Tfeb
Adamts14	2.0090094871912e-36	-4.02032	0.007	0.086	3.32491070130144e-32	0.icl2	Adamts14
Atf7ip	2.0972044372328e-36	0.601892	0.565	0.465	3.47087334362028e-32	0.icl2	Atf7ip
Gpr132	2.42900179506071e-36	-1.10521	0.359	0.526	4.01999797082547e-32	0.icl2	Gpr132
Wdfy3	2.429564633116e-36	-5.49428	0.002	0.076	4.02092946780698e-32	0.icl2	Wdfy3
Cyria	2.65008102592745e-36	-1.90787	0.13	0.266	4.38588409790993e-32	0.icl2	Cyria
Slc2a6	2.88220886411965e-36	-8.5032	0	0.071	4.77005567011801e-32	0.icl2	Slc2a6
Rps17	2.99281354424176e-36	0.314005	0.94	0.83	4.95310641572012e-32	0.icl2	Rps17
Naaa	3.0209130766525e-36	-3.78238	0.015	0.101	4.99961114185988e-32	0.icl2	Naaa
Nlrp3	3.29692452305284e-36	-6.22892	0.003	0.077	5.45641008565245e-32	0.icl2	Nlrp3
Pde4a	3.34386467687946e-36	-4.65849	0.003	0.078	5.53409604023551e-32	0.icl2	Pde4a
Il15	4.02637383482977e-36	-2.73073	0.037	0.138	6.66364869664326e-32	0.icl2	Il15
Dst	4.29967009585333e-36	-2.73938	0.025	0.119	7.11595400863727e-32	0.icl2	Dst
Parp11	5.12478261670761e-36	1.35799	0.245	0.138	8.4815152306511e-32	0.icl2	Parp11
Stambpl1	5.41689096858214e-36	1.08239	0.373	0.261	8.96495455300344e-32	0.icl2	Stambpl1
Atp2b4	6.41559521763995e-36	-1.55759	0.056	0.171	1.06178100851941e-31	0.icl2	Atp2b4
Gsr	6.908279282043e-36	-2.47834	0.121	0.255	1.14332022117812e-31	0.icl2	Gsr
Kmo	7.3125409622351e-36	-4.74148	0.005	0.08	1.21022552924991e-31	0.icl2	Kmo
Cldnd1	7.35122462794601e-36	-1.10449	0.102	0.238	1.21662767592506e-31	0.icl2	Cldnd1
Arhgap21	7.39567274745251e-36	-1.54445	0.057	0.172	1.22398383970339e-31	0.icl2	Arhgap21
Ext1	7.84241477036922e-36	0.556446	0.469	0.341	1.29791964449611e-31	0.icl2	Ext1
Afdn	1.18495297608297e-35	-2.78624	0.015	0.101	1.96109717541731e-31	0.icl2	Afdn
Ldlrad4	1.36271147602622e-35	0.611199	0.618	0.513	2.25528749282339e-31	0.icl2	Ldlrad4
Ndrg1	1.40837604782259e-35	-3.74718	0.006	0.083	2.33086235914639e-31	0.icl2	Ndrg1
Nr3c2	1.42783743703895e-35	-2.69498	0.011	0.092	2.36307095829946e-31	0.icl2	Nr3c2
Dynlt2b	1.45366157137106e-35	-3.00501	0.013	0.097	2.40580990061911e-31	0.icl2	Dynlt2b
Adam11	1.59036343907057e-35	-5.99093	0.004	0.078	2.63205149166179e-31	0.icl2	Adam11
Spib	1.60280947888841e-35	-3.64535	0.002	0.074	2.65264968756033e-31	0.icl2	Spib
Csrnp1	1.659437395498e-35	-1.63266	0.055	0.167	2.74636888954919e-31	0.icl2	Csrnp1
Ptafr	1.70784648298036e-35	-5.41623	0.003	0.075	2.82648592933249e-31	0.icl2	Ptafr
Dpp10	1.76290914150413e-35	-6.95935	0.003	0.075	2.91761462918933e-31	0.icl2	Dpp10
Dnajc9	1.78548769929806e-35	1.06269	0.359	0.254	2.95498214233829e-31	0.icl2	Dnajc9
Zfp608	2.2464543857308e-35	-1.63062	0.072	0.19	3.71788200838448e-31	0.icl2	Zfp608
Sh3bp4	2.43427367512196e-35	-5.40102	0.002	0.073	4.02872293232684e-31	0.icl2	Sh3bp4
Znrf3	2.5657548586821e-35	0.681084	0.508	0.386	4.24632429111888e-31	0.icl2	Znrf3
Emp3	2.57745238148111e-35	0.392785	0.817	0.693	4.26568369135123e-31	0.icl2	Emp3
Rcn3	3.04195290715909e-35	1.73742	0.16	0.07	5.03443206134829e-31	0.icl2	Rcn3
Rabgap1l	4.13694138805954e-35	-0.888544	0.619	0.704	6.84663799723854e-31	0.icl2	Rabgap1l
Cpeb2	4.19698642734376e-35	-1.55934	0.08	0.203	6.94601253725391e-31	0.icl2	Cpeb2
Klra4	4.36522728049815e-35	-7.36151	0.005	0.079	7.22445114922444e-31	0.icl2	Klra4
Irgm2	4.46264550928056e-35	1.72906	0.186	0.089	7.38567831785933e-31	0.icl2	Irgm2
Nr4a1	5.00721618958576e-35	-1.2516	0.196	0.346	8.28694279376444e-31	0.icl2	Nr4a1
Dynlt3	5.2787606289197e-35	-1.46487	0.037	0.139	8.7363488408621e-31	0.icl2	Dynlt3
Pmaip1	6.81559194845785e-35	-1.54272	0.127	0.262	1.12798046746977e-30	0.icl2	Pmaip1
Abracl	6.95481837974807e-35	0.428053	0.732	0.653	1.1510224418483e-30	0.icl2	Abracl
Cxcl2	6.9776731391042e-35	-5.36182	0.01	0.088	1.15480490452174e-30	0.icl2	Cxcl2
Slfn8	8.89213525740717e-35	1.15298	0.282	0.172	1.47164838510089e-30	0.icl2	Slfn8
Gramd3	9.50318119884764e-35	0.366952	0.509	0.355	1.57277648840928e-30	0.icl2	Gramd3
Coro2b	9.8483447469107e-35	-4.24642	0.004	0.077	1.62990105561372e-30	0.icl2	Coro2b
Itprid2	9.90517659959116e-35	-1.95677	0.064	0.179	1.63930672723234e-30	0.icl2	Itprid2
Rpl36	1.30717812185824e-34	0.233945	0.993	0.919	2.16337979167538e-30	0.icl2	Rpl36
Fau	1.61905413615903e-34	0.208556	0.998	0.943	2.6795345953432e-30	0.icl2	Fau
Arap2	1.73963218206676e-34	0.420374	0.58	0.459	2.87909126132049e-30	0.icl2	Arap2
Fnip2	1.82191284748184e-34	-4.73261	0.006	0.079	3.01526576258244e-30	0.icl2	Fnip2
Fscn1	1.83329007576301e-34	-6.84708	0.003	0.074	3.03409507538778e-30	0.icl2	Fscn1
Olfm1	1.9986455345548e-34	-6.7561	0	0.068	3.30775835968819e-30	0.icl2	Olfm1
Hsph1	2.26644156228223e-34	0.4702	0.698	0.566	3.75096078557709e-30	0.icl2	Hsph1
Sirpb1b	2.45191907651332e-34	-7.3615	0.001	0.069	4.05792607162954e-30	0.icl2	Sirpb1b
Mtss1	2.68955013648488e-34	-1.36191	0.087	0.21	4.45120547588248e-30	0.icl2	Mtss1
St8sia4	2.77944594342814e-34	-1.00477	0.322	0.486	4.59998303637357e-30	0.icl2	St8sia4
Ifi207	3.26526725202861e-34	-6.5652	0.001	0.069	5.40401730210734e-30	0.icl2	Ifi207
Slc9a7	3.32246094752493e-34	-1.00432	0.138	0.282	5.49867286815375e-30	0.icl2	Slc9a7
Hp	3.37191707483696e-34	-7.05713	0.002	0.072	5.58052275885517e-30	0.icl2	Hp
Cd24a	3.80228957511741e-34	-2.36071	0.038	0.134	6.29278924681931e-30	0.icl2	Cd24a
Nptn	3.80904305577731e-34	-0.672195	0.419	0.595	6.30396625731144e-30	0.icl2	Nptn
Cfp	4.01590700461334e-34	-3.48076	0.008	0.085	6.64632609263507e-30	0.icl2	Cfp
Tjp2	4.2622496204323e-34	-2.40936	0.023	0.111	7.05402312181546e-30	0.icl2	Tjp2
Nectin1	5.52009606842604e-34	-5.24263	0.003	0.073	9.1357589932451e-30	0.icl2	Nectin1
Fcrla	6.93412629084233e-34	-5.15378	0.002	0.071	1.14759790113441e-29	0.icl2	Fcrla
Pygl	7.57703299220979e-34	-3.78495	0.009	0.085	1.25399896021072e-29	0.icl2	Pygl
Csf1r	8.07010423776368e-34	-5.4293	0.003	0.072	1.33560225134989e-29	0.icl2	Csf1r
Pfkp	8.2603506698899e-34	-1.10333	0.2	0.356	1.36708803586678e-29	0.icl2	Pfkp
Acsl1	9.29058914743672e-34	-1.92923	0.045	0.148	1.53759250390078e-29	0.icl2	Acsl1
Myo1c	9.51411088900862e-34	-2.39911	0.017	0.101	1.57458535213093e-29	0.icl2	Myo1c
Rpl41	9.72252930113516e-34	0.203733	0.996	0.934	1.60907859933787e-29	0.icl2	Rpl41
Ifi47	1.01240509151624e-33	1.00916	0.338	0.228	1.67553042645938e-29	0.icl2	Ifi47
Naip5	1.11513987205664e-33	-5.40975	0.002	0.071	1.84555648825374e-29	0.icl2	Naip5
Rp2	1.14328431672708e-33	-1.81583	0.047	0.151	1.89213554418331e-29	0.icl2	Rp2
Acvr2a	1.14813146513822e-33	-1.15393	0.112	0.244	1.90015757480376e-29	0.icl2	Acvr2a
Sh2d1b1	1.15162383144033e-33	-6.34504	0	0.067	1.90593744103374e-29	0.icl2	Sh2d1b1
Ddhd1	1.56353428307017e-33	-1.4831	0.148	0.292	2.58764923848113e-29	0.icl2	Ddhd1
Esyt2	1.70785075069741e-33	0.51004	0.666	0.581	2.82649299240422e-29	0.icl2	Esyt2
Gtf2i	1.86497438682796e-33	0.8579	0.396	0.294	3.08653261020028e-29	0.icl2	Gtf2i
Adssl1	1.86773191020571e-33	-3.4187	0.008	0.082	3.09109631139045e-29	0.icl2	Adssl1
Rpl36a	2.18530351728543e-33	0.281827	0.982	0.844	3.61667732110738e-29	0.icl2	Rpl36a
Chd2	2.55247233443559e-33	0.380647	0.758	0.676	4.2243417134909e-29	0.icl2	Chd2
Tmem71	2.56888240407875e-33	0.916574	0.394	0.282	4.25150037875034e-29	0.icl2	Tmem71
Pdlim1	2.76646204415708e-33	1.00059	0.356	0.248	4.57849468307997e-29	0.icl2	Pdlim1
Tgif1	3.05206217331407e-33	-1.24435	0.106	0.236	5.05116289683478e-29	0.icl2	Tgif1
Zdhhc20	3.15334718909798e-33	0.611929	0.567	0.481	5.21878959795716e-29	0.icl2	Zdhhc20
Rps15	3.33856737295954e-33	0.290284	0.965	0.871	5.52532900224804e-29	0.icl2	Rps15
Tmem238	3.5536736784317e-33	-2.1866	0.017	0.1	5.88132993780446e-29	0.icl2	Tmem238
Jak2	3.5950700764202e-33	-1.47453	0.276	0.427	5.94984097647543e-29	0.icl2	Jak2
Ppt1	3.71843629799958e-33	-1.84445	0.13	0.267	6.1540120731893e-29	0.icl2	Ppt1
Fstl4	3.96633375412755e-33	-5.133	0.002	0.07	6.5642823630811e-29	0.icl2	Fstl4
Slco5a1	4.03150467385683e-33	-6.76165	0.002	0.07	6.67214023523305e-29	0.icl2	Slco5a1
Dock1	4.08484365727591e-33	-6.36424	0.001	0.067	6.76041625279163e-29	0.icl2	Dock1
Ero1a	4.22487183651974e-33	-1.14873	0.105	0.233	6.99216288944017e-29	0.icl2	Ero1a
Ube2e3	4.45829048879348e-33	-0.824187	0.163	0.318	7.37847075895321e-29	0.icl2	Ube2e3
Rab31	5.0868976547933e-33	-2.53427	0.021	0.106	8.41881561868291e-29	0.icl2	Rab31
Bmp2k	5.92439585435596e-33	-1.91409	0.172	0.31	9.80487513895911e-29	0.icl2	Bmp2k
Ubl3	6.11226823709897e-33	-0.866299	0.289	0.455	1.01158039323988e-28	0.icl2	Ubl3
Jazf1	6.44598653325413e-33	-2.51905	0.013	0.091	1.06681077125356e-28	0.icl2	Jazf1
Ly6d	6.6487167932326e-33	-3.932	0.025	0.111	1.10036262928e-28	0.icl2	Ly6d
Fam110a	6.86214373247378e-33	-2.05659	0.023	0.111	1.13568478772441e-28	0.icl2	Fam110a
Tbc1d10c	8.18397968687759e-33	0.731026	0.501	0.412	1.35444863817824e-28	0.icl2	Tbc1d10c
Cd38	9.34588477237846e-33	-3.1561	0.012	0.088	1.54674392982863e-28	0.icl2	Cd38
Hectd2	1.02369749596268e-32	1.73692	0.138	0.057	1.69421935581824e-28	0.icl2	Hectd2
Txndc5	1.03285601400554e-32	-1.31452	0.074	0.191	1.70937670317917e-28	0.icl2	Txndc5
Klra9	1.12653402245233e-32	-6.41654	0.002	0.069	1.8644138071586e-28	0.icl2	Klra9
Slc6a19	1.17575789527691e-32	3.23985	0.053	0.008	1.94587931668329e-28	0.icl2	Slc6a19
Pde5a	1.19157524640977e-32	-2.58823	0.017	0.098	1.97205703280817e-28	0.icl2	Pde5a
Ninj1	1.22015818408726e-32	-1.80276	0.054	0.16	2.01936179466442e-28	0.icl2	Ninj1
Ppp1ca	1.2293195978263e-32	0.42448	0.733	0.665	2.03452393440253e-28	0.icl2	Ppp1ca
Slc8b1	1.52028635218009e-32	-2.81526	0.024	0.11	2.51607391285805e-28	0.icl2	Slc8b1
Atxn7l1	1.79638059904924e-32	-1.03712	0.226	0.383	2.97300989142649e-28	0.icl2	Atxn7l1
Dock7	1.82013719303869e-32	-5.27229	0.002	0.069	3.01232705447903e-28	0.icl2	Dock7
Tle4	2.22136148757413e-32	0.544036	0.601	0.513	3.67635326193518e-28	0.icl2	Tle4
Ier2	2.52925216027091e-32	-0.723902	0.489	0.632	4.18591232524835e-28	0.icl2	Ier2
Blvrb	2.77010182687188e-32	-1.74232	0.033	0.127	4.58451852347296e-28	0.icl2	Blvrb
Tifab	2.94338584243489e-32	-5.5391	0.001	0.066	4.87130356922974e-28	0.icl2	Tifab
Lamc1	3.2614553457308e-32	-3.67404	0.007	0.078	5.39770859718447e-28	0.icl2	Lamc1
Tbc1d4	3.76923034343071e-32	-3.36833	0.104	0.216	6.23807621837783e-28	0.icl2	Tbc1d4
Paip2	3.87694748843845e-32	0.512103	0.682	0.629	6.41634809336564e-28	0.icl2	Paip2
Hspa4	4.12102144960341e-32	0.511627	0.685	0.625	6.82029049909364e-28	0.icl2	Hspa4
Ncald	4.25165237313054e-32	-1.98491	0.036	0.128	7.03648467753104e-28	0.icl2	Ncald
Ppp3ca	4.45610091739237e-32	-0.651417	0.503	0.653	7.37484701828437e-28	0.icl2	Ppp3ca
Snx8	4.54817401077719e-32	-4.18729	0.004	0.072	7.52722798783625e-28	0.icl2	Snx8
Sav1	5.22454639180378e-32	-1.60907	0.045	0.145	8.64662427843526e-28	0.icl2	Sav1
Ehd4	5.32198793613867e-32	-1.14878	0.088	0.209	8.8078900343095e-28	0.icl2	Ehd4
Cd4	6.06898448263003e-32	-2.93945	0.015	0.092	1.00441693187527e-27	0.icl2	Cd4
Rgs1	6.36436178157663e-32	-0.843103	0.364	0.506	1.05330187485093e-27	0.icl2	Rgs1
Naga	6.55147199675603e-32	-1.8933	0.049	0.15	1.08426861546312e-27	0.icl2	Naga
Myh9	7.0755852672714e-32	0.342078	0.814	0.75	1.17100936173342e-27	0.icl2	Myh9
Hpse	7.73740882564181e-32	-4.19247	0.004	0.07	1.28054116064372e-27	0.icl2	Hpse
Tnni2	8.17466214169311e-32	-4.64532	0.002	0.067	1.35290658445021e-27	0.icl2	Tnni2
Eepd1	8.53821547172696e-32	-3.88325	0.007	0.076	1.41307466057081e-27	0.icl2	Eepd1
Yes1	9.12264714658561e-32	-4.60171	0.005	0.072	1.50979810275992e-27	0.icl2	Yes1
Inpp5a	1.07360428281756e-31	-1.69139	0.052	0.154	1.77681508806306e-27	0.icl2	Inpp5a
Stat3	1.10841866748307e-31	-0.925463	0.353	0.523	1.83443289468448e-27	0.icl2	Stat3
Cpne2	1.1751019213498e-31	-3.14934	0.011	0.085	1.94479367983392e-27	0.icl2	Cpne2
Slc15a4	1.22567174757768e-31	-1.58849	0.042	0.139	2.02848674224105e-27	0.icl2	Slc15a4
Ankrd6	1.23847712534666e-31	-2.96824	0.012	0.087	2.04967964244873e-27	0.icl2	Ankrd6
Tmem154	1.25471317477375e-31	-1.30691	0.062	0.17	2.07655030425055e-27	0.icl2	Tmem154
Nostrin	1.4202139599539e-31	-5.04074	0.006	0.074	2.3504541037237e-27	0.icl2	Nostrin
Tamalin	1.521195960455e-31	-2.821	0.045	0.14	2.51757931455303e-27	0.icl2	Tamalin
Nadk	1.55572981420471e-31	-1.66324	0.119	0.244	2.57473284250879e-27	0.icl2	Nadk
Gem	1.56554663133475e-31	-1.05969	0.369	0.497	2.59097967485901e-27	0.icl2	Gem
Vamp8	1.71624778944878e-31	-0.730854	0.351	0.527	2.84039009153774e-27	0.icl2	Vamp8
Colgalt1	1.78705318809959e-31	-1.29921	0.073	0.187	2.95757302630482e-27	0.icl2	Colgalt1
Auts2	1.96966126365938e-31	0.543138	0.259	0.143	3.25978939135627e-27	0.icl2	Auts2
Mgat4b	2.09153582285168e-31	-1.77941	0.036	0.128	3.46149178681953e-27	0.icl2	Mgat4b
Gmfg	2.80638604622379e-31	0.309131	0.802	0.708	4.64456890650038e-27	0.icl2	Gmfg
Pilra	3.17274069156305e-31	-6.49097	0.001	0.063	5.25088584453685e-27	0.icl2	Pilra
Zfp36l1	3.23219934456816e-31	-0.630673	0.489	0.627	5.34928991526031e-27	0.icl2	Zfp36l1
Strip2	3.49539793005552e-31	-4.83604	0.007	0.075	5.78488357424189e-27	0.icl2	Strip2
Tbxa2r	3.64683721890562e-31	1.92272	0.131	0.054	6.03551559728881e-27	0.icl2	Tbxa2r
Impact	3.72238371063529e-31	-0.796162	0.248	0.408	6.16054504110141e-27	0.icl2	Impact
Mfsd10	3.80569034059943e-31	-1.24738	0.063	0.172	6.29841751369206e-27	0.icl2	Mfsd10
Dusp3	3.86676861582834e-31	-4.1997	0.003	0.068	6.39950205919591e-27	0.icl2	Dusp3
Dmxl2	4.10860345421798e-31	-6.43492	0.001	0.063	6.79973871673076e-27	0.icl2	Dmxl2
Cacnb3	4.31874979706857e-31	-6.50037	0.004	0.069	7.14753091414849e-27	0.icl2	Cacnb3
Tbc1d15	4.56932164655315e-31	-0.983615	0.211	0.367	7.56222732504546e-27	0.icl2	Tbc1d15
Rpl31	4.71019225167314e-31	0.231275	0.91	0.812	7.79536817651905e-27	0.icl2	Rpl31
Meis1	4.73191732081054e-31	-4.52376	0.001	0.064	7.83132316594144e-27	0.icl2	Meis1
Ccdc88c	5.0133042031364e-31	0.5744	0.555	0.47	8.29701845619075e-27	0.icl2	Ccdc88c
Hip1r	5.44467438707946e-31	-1.24837	0.069	0.18	9.01093611061651e-27	0.icl2	Hip1r
Asb2	5.5381523834954e-31	-4.24681	0.003	0.067	9.16564219468489e-27	0.icl2	Asb2
Fgd4	6.32290605643885e-31	-7.41441	0	0.061	1.04644095234063e-26	0.icl2	Fgd4
mt-Nd5	6.36323478536218e-31	-0.926496	0.814	0.858	1.05311535697744e-26	0.icl2	mt-Nd5
Ramp3	6.46196745514027e-31	-3.02671	0.023	0.103	1.06945561382572e-26	0.icl2	Ramp3
Il17re	6.52203737172273e-31	-6.02165	0.001	0.062	1.07939718502011e-26	0.icl2	Il17re
Cdon	7.45875623345085e-31	-1.42757	0.062	0.168	1.23442415663612e-26	0.icl2	Cdon
Rpl22	7.76502664902496e-31	0.252437	0.99	0.879	1.28511191041363e-26	0.icl2	Rpl22
Slc3a2	8.69970718078122e-31	-0.665107	0.349	0.523	1.43980153841929e-26	0.icl2	Slc3a2
Ier5l	1.0187942385347e-30	-3.46415	0.007	0.075	1.68610446477493e-26	0.icl2	Ier5l
Ifi211	1.11696982111665e-30	-4.73438	0.002	0.065	1.84858505394806e-26	0.icl2	Ifi211
Wfdc17	1.14583502329465e-30	-6.24717	0.004	0.069	1.89635696355265e-26	0.icl2	Wfdc17
Nenf	1.15530148874255e-30	-1.39456	0.035	0.126	1.91202396386893e-26	0.icl2	Nenf
Erp29	1.33700553989587e-30	-0.838063	0.291	0.445	2.21274416852767e-26	0.icl2	Erp29
Rad51b	1.36955284445304e-30	-2.16214	0.027	0.111	2.26660995756978e-26	0.icl2	Rad51b
Elmo2	1.72856504982244e-30	-1.51394	0.039	0.133	2.86077515745614e-26	0.icl2	Elmo2
Fmn1	2.17315637504344e-30	-7.45531	0	0.06	3.5965738006969e-26	0.icl2	Fmn1
Hcst	2.31216541632713e-30	0.299873	0.813	0.662	3.8266337640214e-26	0.icl2	Hcst
Adgrg6	2.60797411051317e-30	-6.44618	0.002	0.064	4.3161971528993e-26	0.icl2	Adgrg6
Ehd3	2.64644188082332e-30	1.53709	0.188	0.098	4.3798613127626e-26	0.icl2	Ehd3
Eps8	2.86423109101482e-30	-5.72608	0.002	0.063	4.74030245562952e-26	0.icl2	Eps8
P4ha1	2.93092903274465e-30	1.11862	0.397	0.3	4.85068754919239e-26	0.icl2	P4ha1
Ebf1	3.00858183889312e-30	-5.03509	0.006	0.072	4.97920294336811e-26	0.icl2	Ebf1
Dhrs3	3.10488614345292e-30	-3.48914	0.007	0.073	5.13858656741458e-26	0.icl2	Dhrs3
Ccr1	3.53174194069196e-30	-6.9705	0.001	0.061	5.84503291184519e-26	0.icl2	Ccr1
Smyd2	3.63973692225493e-30	-2.18966	0.018	0.096	6.02376460633191e-26	0.icl2	Smyd2
Stom	4.12671293021434e-30	-4.89451	0.002	0.063	6.82970989950473e-26	0.icl2	Stom
Krt83	5.51229810543686e-30	-8.12745	0	0.058	9.12285336449801e-26	0.icl2	Krt83
Reep3	5.63091110501317e-30	-0.860818	0.145	0.283	9.3191578787968e-26	0.icl2	Reep3
Tnfrsf25	6.83885596669428e-30	-1.8704	0.034	0.121	1.1318306624879e-25	0.icl2	Tnfrsf25
Tnfaip3	7.42051501675219e-30	-0.750546	0.504	0.629	1.22809523527249e-25	0.icl2	Tnfaip3
Ldlrad3	8.4655787160282e-30	-2.99575	0.013	0.084	1.40105327750267e-25	0.icl2	Ldlrad3
Wdfy2	8.58702799937218e-30	-1.30219	0.066	0.171	1.4211531338961e-25	0.icl2	Wdfy2
Fyb	8.76278620807193e-30	0.177315	0.822	0.691	1.4502411174359e-25	0.icl2	Fyb
Abhd8	8.91709327562915e-30	1.11547	0.287	0.19	1.47577893711662e-25	0.icl2	Abhd8
Card19	9.02450157010913e-30	-0.978696	0.135	0.269	1.49355500985306e-25	0.icl2	Card19
Gna13	9.28252420240442e-30	-0.852422	0.357	0.511	1.53625775549793e-25	0.icl2	Gna13
Zbtb7b	9.33233683160532e-30	-3.41841	0.004	0.066	1.54450174563068e-25	0.icl2	Zbtb7b
Tspan33	1.00909048553096e-29	-4.79495	0.003	0.064	1.67004475355374e-25	0.icl2	Tspan33
Gdpd5	1.22141920617735e-29	-2.89172	0.012	0.082	2.02144878622351e-25	0.icl2	Gdpd5
M6pr	1.31239224538529e-29	-0.731009	0.225	0.386	2.17200916611265e-25	0.icl2	M6pr
5031439G07Rik	1.45130770688894e-29	-1.58496	0.064	0.166	2.40191425490119e-25	0.icl2	5031439G07Rik
Ggt1	1.47531616797388e-29	2.78541	0.064	0.015	2.44164825799677e-25	0.icl2	Ggt1
Trim30c	1.65223619046701e-29	2.34879	0.082	0.024	2.7344508952229e-25	0.icl2	Trim30c
Smo	1.680197915664e-29	2.9798	0.055	0.01	2.78072755042391e-25	0.icl2	Smo
Map3k5	2.24708842232146e-29	-0.92408	0.249	0.401	3.71893133894202e-25	0.icl2	Map3k5
Ntng2	2.32061607836604e-29	-2.0245	0.038	0.127	3.84061960969579e-25	0.icl2	Ntng2
Sec11c	2.33596172626299e-29	-0.568929	0.516	0.655	3.86601665696525e-25	0.icl2	Sec11c
Suco	2.37425836076348e-29	-0.887384	0.291	0.447	3.92939758706355e-25	0.icl2	Suco
Ddx3x	2.402255504289e-29	-0.810576	0.379	0.536	3.9757328595983e-25	0.icl2	Ddx3x
Smim3	2.9799583944648e-29	-2.50799	0.022	0.099	4.93183114283924e-25	0.icl2	Smim3
Plxnb2	3.56598303115871e-29	-5.29048	0.001	0.059	5.90170191656766e-25	0.icl2	Plxnb2
Aplp2	3.84664826738457e-29	-0.787784	0.204	0.353	6.36620288252146e-25	0.icl2	Aplp2
Cass4	3.98368684516582e-29	-3.47516	0.015	0.087	6.59300172874944e-25	0.icl2	Cass4
Sema7a	4.03569254108102e-29	-5.27767	0.003	0.064	6.67907115548908e-25	0.icl2	Sema7a
Arhgap28	4.06553364589745e-29	-6.96308	0.001	0.059	6.72845818396028e-25	0.icl2	Arhgap28
Ftl1	4.0852206941558e-29	-0.821309	0.906	0.886	6.76104024882785e-25	0.icl2	Ftl1
Aph1c	4.24831711757273e-29	-4.17825	0.004	0.066	7.03096482958287e-25	0.icl2	Aph1c
B4galt5	4.27211015177669e-29	-0.995835	0.136	0.264	7.07034230119042e-25	0.icl2	B4galt5
Dph5	4.42430676251258e-29	1.15004	0.275	0.179	7.32222769195831e-25	0.icl2	Dph5
Rgs10	4.86635682717305e-29	0.519642	0.51	0.402	8.05382054897141e-25	0.icl2	Rgs10
Cnnm2	5.02408603346116e-29	-1.70787	0.046	0.139	8.31486238537823e-25	0.icl2	Cnnm2
Snx20	5.227169886401e-29	-1.03896	0.232	0.383	8.65096616199365e-25	0.icl2	Snx20
Klhdc1	5.28591290141948e-29	1.34541	0.21	0.119	8.74818585184924e-25	0.icl2	Klhdc1
Rabgef1	5.3912819772211e-29	-1.28915	0.092	0.206	8.92257167230093e-25	0.icl2	Rabgef1
Evi2a	6.0822604129473e-29	-1.04421	0.09	0.205	1.00661409834278e-24	0.icl2	Evi2a
Crlf2	8.44065303145957e-29	-0.747783	0.167	0.31	1.39692807670656e-24	0.icl2	Crlf2
Tax1bp1	1.01574450210373e-28	-0.575304	0.512	0.666	1.68105715098168e-24	0.icl2	Tax1bp1
Lrp8	1.07497016998884e-28	-4.28154	0.008	0.072	1.77907563133154e-24	0.icl2	Lrp8
Ttc39c	1.08546868550856e-28	-3.5006	0.007	0.071	1.79645067451667e-24	0.icl2	Ttc39c
Ptgs2	1.21524032332617e-28	-5.72013	0.007	0.07	2.0112227351048e-24	0.icl2	Ptgs2
Slc44a2	1.24759455520826e-28	0.63721	0.435	0.332	2.06476898886967e-24	0.icl2	Slc44a2
Gm5150	1.40597524036865e-28	-5.91068	0.001	0.059	2.32688902281012e-24	0.icl2	Gm5150
Vwa8	1.50333583010588e-28	-1.10946	0.073	0.179	2.48802079882522e-24	0.icl2	Vwa8
Lpcat1	1.51476933402075e-28	-3.14798	0.011	0.078	2.50694324780434e-24	0.icl2	Lpcat1
Evi5	1.57716709670975e-28	-1.33835	0.037	0.125	2.61021154505464e-24	0.icl2	Evi5
Rbbp8	1.62653523119168e-28	-1.36946	0.108	0.223	2.69191580762224e-24	0.icl2	Rbbp8
Lacc1	1.8420207636259e-28	-4.53025	0.004	0.064	3.04854436380086e-24	0.icl2	Lacc1
Prr5	1.96122914676262e-28	-3.9556	0.003	0.063	3.24583423789214e-24	0.icl2	Prr5
Foxn3	2.0650265022263e-28	0.400153	0.714	0.639	3.41761886118452e-24	0.icl2	Foxn3
C5ar1	2.1373924831766e-28	-8.52249	0	0.056	3.53738455965727e-24	0.icl2	C5ar1
Hdc	2.15263162353388e-28	-5.77025	0.009	0.074	3.56260533694857e-24	0.icl2	Hdc
Pik3cd	2.16618982461865e-28	0.543894	0.588	0.513	3.58504415974387e-24	0.icl2	Pik3cd
Neurl3	2.21284738800271e-28	-0.807708	0.299	0.447	3.66226242714448e-24	0.icl2	Neurl3
Slc25a24	2.42310357011752e-28	-1.69974	0.038	0.124	4.0102364085445e-24	0.icl2	Slc25a24
Clec4d	2.73383328483144e-28	-8.39379	0	0.056	4.52449408639603e-24	0.icl2	Clec4d
Sirpb1c	2.87214864309865e-28	-6.49191	0	0.056	4.75340600432826e-24	0.icl2	Sirpb1c
Trim30b	3.06869389444993e-28	-4.0973	0.006	0.067	5.07868839531463e-24	0.icl2	Trim30b
Tab2	3.38821972228652e-28	-0.665797	0.317	0.478	5.60750364038418e-24	0.icl2	Tab2
Ptk2	3.63862890846776e-28	-1.92083	0.021	0.097	6.02193084351415e-24	0.icl2	Ptk2
Scart2	4.31677236399964e-28	0.385613	0.195	0.095	7.1442582624194e-24	0.icl2	Scart2
Sowahc	4.85523820485787e-28	-4.16228	0.006	0.068	8.03541922903978e-24	0.icl2	Sowahc
Arid1a	4.936225324489e-28	0.561286	0.553	0.486	8.1694529120293e-24	0.icl2	Arid1a
Ar	5.18440658207228e-28	0.712582	0.336	0.222	8.58019289332962e-24	0.icl2	Ar
Il3ra	5.18647197076502e-28	-2.78363	0.015	0.084	8.5836111116161e-24	0.icl2	Il3ra
Dock4	5.8055717376594e-28	-2.015	0.038	0.122	9.6082212258263e-24	0.icl2	Dock4
Vegfc	5.82320268797882e-28	-6.81518	0	0.055	9.63740044860495e-24	0.icl2	Vegfc
Rnf150	5.9251121115191e-28	-6.04017	0.001	0.057	9.80606054456411e-24	0.icl2	Rnf150
Rinl	6.38103957381637e-28	0.497774	0.564	0.471	1.05606204946661e-23	0.icl2	Rinl
Pi4k2a	6.51022802334385e-28	-1.07184	0.137	0.264	1.07744273786341e-23	0.icl2	Pi4k2a
Agrp	6.91243989688535e-28	1.28647	0.212	0.122	1.14400880293453e-23	0.icl2	Agrp
Tma7	6.92152417821734e-28	0.337946	0.824	0.754	1.14551225149497e-23	0.icl2	Tma7
Cx3cr1	7.10114562210195e-28	-2.60601	0.022	0.096	1.17523960045787e-23	0.icl2	Cx3cr1
Mif4gd	7.60872405960831e-28	-1.01736	0.101	0.217	1.25924383186517e-23	0.icl2	Mif4gd
Styk1	7.66673842813893e-28	-5.01983	0.002	0.059	1.26884520985699e-23	0.icl2	Styk1
Nbn	7.73672831825021e-28	-1.48343	0.038	0.125	1.28042853667041e-23	0.icl2	Nbn
Jag1	7.80922027291412e-28	-5.84913	0.001	0.056	1.29242595516729e-23	0.icl2	Jag1
Psme2	8.85942559606536e-28	0.394501	0.666	0.59	1.46623493614882e-23	0.icl2	Psme2
Rtn1	8.98866345389272e-28	-8.53065	0	0.054	1.48762380161924e-23	0.icl2	Rtn1
Rgs18	9.16175609119148e-28	-1.89998	0.02	0.094	1.51627063309219e-23	0.icl2	Rgs18
C3	9.4475507726556e-28	-6.92211	0.001	0.056	1.5635696528745e-23	0.icl2	C3
Clec2d	9.78831277320819e-28	0.236524	0.738	0.652	1.61996576396596e-23	0.icl2	Clec2d
Ebi3	9.95043809231782e-28	-5.26777	0	0.055	1.6467975042786e-23	0.icl2	Ebi3
Plekhg1	1.00478918945871e-27	-6.11902	0.001	0.056	1.66292610855416e-23	0.icl2	Plekhg1
Slc22a23	1.0077820980055e-27	-5.35079	0.002	0.058	1.66787937219911e-23	0.icl2	Slc22a23
Ctsb	1.1090873687853e-27	-1.57924	0.202	0.329	1.83553959533967e-23	0.icl2	Ctsb
Gng10	1.14588613578899e-27	-0.887678	0.221	0.364	1.89644155473078e-23	0.icl2	Gng10
Crem	1.29663900987174e-27	-1.31684	0.177	0.305	2.14593756133773e-23	0.icl2	Crem
Or13a27	1.4580454914997e-27	-7.94225	0	0.054	2.413065288432e-23	0.icl2	Or13a27
Fbxw8	1.51596527912856e-27	-1.35145	0.041	0.129	2.50892253695776e-23	0.icl2	Fbxw8
Bcar3	1.55018153548316e-27	-5.19029	0.004	0.062	2.56555044122464e-23	0.icl2	Bcar3
Anp32a	1.82355424599811e-27	0.385242	0.719	0.663	3.01798227712687e-23	0.icl2	Anp32a
Gstt2	1.94928112561357e-27	1.22234	0.209	0.12	3.22606026289046e-23	0.icl2	Gstt2
Acot7	1.95398550493664e-27	-1.36754	0.055	0.149	3.23384601067015e-23	0.icl2	Acot7
Cpne3	2.13554321826292e-27	-0.950833	0.095	0.209	3.53432402622513e-23	0.icl2	Cpne3
Lrrc8d	2.2301840196846e-27	-1.01684	0.179	0.312	3.69095455257802e-23	0.icl2	Lrrc8d
Cox6a2	2.69374356095675e-27	-6.78543	0.002	0.058	4.45814559338343e-23	0.icl2	Cox6a2
Tmed3	2.70617866816068e-27	-0.742635	0.111	0.234	4.47872569580592e-23	0.icl2	Tmed3
Tnf	2.76338829245789e-27	-1.22229	0.118	0.233	4.57340762401781e-23	0.icl2	Tnf
Camk2d	2.94243544954652e-27	0.518595	0.577	0.493	4.86973066899949e-23	0.icl2	Camk2d
Trim12a	3.75553569407908e-27	0.665559	0.48	0.403	6.21541157370087e-23	0.icl2	Trim12a
Mical3	4.30536780771503e-27	-2.30901	0.045	0.131	7.12538372176838e-23	0.icl2	Mical3
Arhgap22	4.77491305890838e-27	-5.72563	0.003	0.059	7.90248111249337e-23	0.icl2	Arhgap22
Rnf149	5.04187977304721e-27	-2.02263	0.137	0.252	8.34431102439313e-23	0.icl2	Rnf149
Trpm2	5.11839847418748e-27	-5.99278	0.002	0.057	8.47094947478028e-23	0.icl2	Trpm2
Prdm1	5.61412169536262e-27	-2.94168	0.012	0.077	9.29137140582513e-23	0.icl2	Prdm1
Rnase4	5.85101080295271e-27	-4.49603	0.002	0.057	9.68342287888674e-23	0.icl2	Rnase4
Large1	6.03232506531348e-27	-1.52159	0.132	0.247	9.98349798309382e-23	0.icl2	Large1
Nol4l	6.20828417404106e-27	-2.36037	0.008	0.07	1.02747103080379e-22	0.icl2	Nol4l
Sgms2	6.50195346097447e-27	-6.28139	0.002	0.056	1.07607329779127e-22	0.icl2	Sgms2
Hsd11b1	6.58037869288623e-27	0.670027	0.449	0.342	1.08905267367267e-22	0.icl2	Hsd11b1
Tnfsf12	6.8660159655779e-27	-5.54898	0.001	0.054	1.13632564230314e-22	0.icl2	Tnfsf12
Ly96	7.10486153335861e-27	-2.43501	0.011	0.075	1.17585458377085e-22	0.icl2	Ly96
Dscaml1	7.77971117967422e-27	-5.98866	0.002	0.057	1.28754220023608e-22	0.icl2	Dscaml1
Trem3	8.11135183947346e-27	-7.68901	0	0.053	1.34242872943286e-22	0.icl2	Trem3
Itpr2	9.22288836082149e-27	0.503733	0.577	0.502	1.52638802371596e-22	0.icl2	Itpr2
Nsd3	9.373895278339e-27	0.297672	0.752	0.689	1.5513796685651e-22	0.icl2	Nsd3
Rhobtb1	9.47595760157929e-27	-4.77657	0.002	0.056	1.56827098306137e-22	0.icl2	Rhobtb1
Arrb1	9.77378614011391e-27	-1.11992	0.063	0.162	1.61756160618885e-22	0.icl2	Arrb1
Slc7a7	1.05140088766252e-26	-3.73586	0.006	0.064	1.74006846908147e-22	0.icl2	Slc7a7
Ppp1r11	1.13533979603698e-26	-0.630899	0.291	0.454	1.8789873624412e-22	0.icl2	Ppp1r11
Ubash3a	1.14343010549547e-26	1.47798	0.165	0.085	1.89237682459501e-22	0.icl2	Ubash3a
Prkag2	1.16054925011049e-26	-0.91458	0.105	0.22	1.92070900893285e-22	0.icl2	Prkag2
Cd300ld	1.28169394826462e-26	-9.01606	0	0.052	2.12120348437795e-22	0.icl2	Cd300ld
Upp1	1.31317011396133e-26	-6.28441	0.001	0.055	2.17329653860599e-22	0.icl2	Upp1
Ifi214	1.34939555851699e-26	1.4725	0.178	0.095	2.23324964934561e-22	0.icl2	Ifi214
Epb41l2	1.49553555783888e-26	-0.943062	0.187	0.324	2.47511134822335e-22	0.icl2	Epb41l2
Spire1	1.51391752350121e-26	-3.74772	0.002	0.056	2.50553350139449e-22	0.icl2	Spire1
Itm2c	1.70500599861423e-26	-0.925868	0.198	0.335	2.82178492770654e-22	0.icl2	Itm2c
Prkar2a	1.73864407465621e-26	-1.8319	0.034	0.115	2.87745594355603e-22	0.icl2	Prkar2a
Arhgef28	1.77858603789803e-26	-5.96034	0.001	0.055	2.94355989272124e-22	0.icl2	Arhgef28
Cemip2	1.78185230141493e-26	-2.00727	0.021	0.093	2.94896555884171e-22	0.icl2	Cemip2
Cd101	1.8694643506413e-26	-2.54254	0.021	0.091	3.09396350031135e-22	0.icl2	Cd101
Snx10	1.92072247325421e-26	-1.26713	0.059	0.152	3.17879569323572e-22	0.icl2	Snx10
Akap7	1.9958213147066e-26	-2.68663	0.013	0.078	3.30308427583942e-22	0.icl2	Akap7
Pqlc3	2.06631510215178e-26	-1.48948	0.031	0.109	3.4197514940612e-22	0.icl2	Pqlc3
Coro2a	2.18136255445413e-26	-0.581604	0.207	0.351	3.61015502762158e-22	0.icl2	Coro2a
Qki	2.40091686259033e-26	-0.657306	0.306	0.467	3.973517407587e-22	0.icl2	Qki
Piezo1	2.49489390782871e-26	-1.00117	0.168	0.3	4.12904941745651e-22	0.icl2	Piezo1
Rfx3	2.4992902955542e-26	0.682836	0.444	0.356	4.1363254391422e-22	0.icl2	Rfx3
H2-M2	2.52033954045127e-26	-7.33242	0.002	0.055	4.17116193944685e-22	0.icl2	H2-M2
Adk	2.53336467045424e-26	0.867123	0.326	0.229	4.19271852960177e-22	0.icl2	Adk
Dusp16	2.6003697608157e-26	-1.18346	0.119	0.236	4.30361195414999e-22	0.icl2	Dusp16
Ncf1	2.67511108025952e-26	-1.42543	0.082	0.182	4.4273088378295e-22	0.icl2	Ncf1
Plekhg3	2.72792691258679e-26	-2.36001	0.014	0.079	4.51471904033115e-22	0.icl2	Plekhg3
Nucb2	2.75305332541959e-26	-2.33789	0.024	0.096	4.55630325356942e-22	0.icl2	Nucb2
Nfkbib	2.96721591679761e-26	-0.738311	0.127	0.253	4.91074234230005e-22	0.icl2	Nfkbib
Vwa5a	3.05426780531321e-26	-1.4429	0.032	0.112	5.05481321779336e-22	0.icl2	Vwa5a
Nupr1	3.12424582971448e-26	-4.99871	0.001	0.054	5.17062684817747e-22	0.icl2	Nupr1
Cxcr4	3.39869232910481e-26	-1.26007	0.126	0.242	5.62483580466846e-22	0.icl2	Cxcr4
Uap1	3.48426073230022e-26	-1.78653	0.076	0.176	5.76645151195686e-22	0.icl2	Uap1
Sdccag8	3.70323163718564e-26	-0.800903	0.166	0.3	6.12884835954223e-22	0.icl2	Sdccag8
Plekhb2	3.70534360983942e-26	-1.16401	0.055	0.148	6.13234367428425e-22	0.icl2	Plekhb2
Cd82	3.75050872741122e-26	-0.659541	0.365	0.514	6.20709194386557e-22	0.icl2	Cd82
Rhbdf2	4.02219184875504e-26	-2.23071	0.019	0.088	6.65672750968958e-22	0.icl2	Rhbdf2
Bcl7c	4.0477019925178e-26	-0.54404	0.165	0.307	6.69894679761696e-22	0.icl2	Bcl7c
Itgal	4.30126201497645e-26	-0.692783	0.387	0.538	7.11858863478603e-22	0.icl2	Itgal
Comt	4.43131392134038e-26	-1.03382	0.076	0.179	7.33382453981832e-22	0.icl2	Comt
Ccdc184	4.50145166002363e-26	-5.27245	0.002	0.056	7.44990249733911e-22	0.icl2	Ccdc184
Nup98	4.50413688017982e-26	-0.941585	0.287	0.43	7.45434653669761e-22	0.icl2	Nup98
Ifitm1	4.65735786013036e-26	-7.59188	0.003	0.057	7.70792725851574e-22	0.icl2	Ifitm1
Rgs12	4.73597563542035e-26	-2.69974	0.014	0.079	7.83803967662068e-22	0.icl2	Rgs12
Gtf2a1	4.75367666846451e-26	-1.26437	0.17	0.3	7.86733488630877e-22	0.icl2	Gtf2a1
Rpl3	5.16894865830219e-26	0.218764	0.992	0.889	8.55461002949013e-22	0.icl2	Rpl3
Rpl39	5.32249289478308e-26	0.209288	0.993	0.901	8.808725740866e-22	0.icl2	Rpl39
Skp1	5.43273721274092e-26	0.658103	0.511	0.445	8.99118008708622e-22	0.icl2	Skp1
Rin2	5.51419249016904e-26	-4.33049	0.005	0.062	9.12598857122976e-22	0.icl2	Rin2
Slamf8	5.66034404605445e-26	-7.00485	0	0.051	9.36786939622012e-22	0.icl2	Slamf8
Mapkapk3	5.99454347598481e-26	-0.999252	0.089	0.197	9.92096945275486e-22	0.icl2	Mapkapk3
Uvrag	6.11722940477113e-26	-1.1168	0.416	0.546	1.01240146648962e-21	0.icl2	Uvrag
Il18	6.27042900273988e-26	-5.68436	0.001	0.052	1.03775599995345e-21	0.icl2	Il18
Rela	6.3110919632351e-26	-0.912761	0.126	0.25	1.04448571991541e-21	0.icl2	Rela
Abcc1	6.32514368938059e-26	-1.20592	0.079	0.182	1.04681128059249e-21	0.icl2	Abcc1
Ago4	6.33487923938899e-26	-5.2048	0.001	0.052	1.04842251411888e-21	0.icl2	Ago4
Shb	6.70394795585402e-26	-2.37325	0.018	0.086	1.10950338669384e-21	0.icl2	Shb
Adgre1	6.92668820949219e-26	-8.4958	0	0.05	1.14636689867096e-21	0.icl2	Adgre1
Rap2a	8.26702853758669e-26	-1.67006	0.041	0.124	1.3681932229706e-21	0.icl2	Rap2a
Mmp9	8.81127720804149e-26	-8.09544	0.001	0.052	1.45826637793087e-21	0.icl2	Mmp9
Cdh2	8.85072824803709e-26	-7.04709	0.002	0.054	1.46479552505014e-21	0.icl2	Cdh2
Gnb4	9.03124068324336e-26	-2.78488	0.024	0.096	1.49467033307678e-21	0.icl2	Gnb4
Pbxip1	9.15143009169808e-26	-0.876152	0.171	0.304	1.51456168017603e-21	0.icl2	Pbxip1
Chn2	9.56407150527052e-26	-0.87768	0.188	0.313	1.58285383412227e-21	0.icl2	Chn2
Mgst1	9.66599882747667e-26	-5.88168	0.001	0.053	1.59972280594739e-21	0.icl2	Mgst1
H2-Q6	9.87286381391598e-26	-0.573632	0.418	0.574	1.63395896120309e-21	0.icl2	H2-Q6
Ifi204	1.02340049173448e-25	-4.58509	0.004	0.058	1.69372781382057e-21	0.icl2	Ifi204
Ubc	1.11606818715472e-25	-0.383752	0.811	0.854	1.84709284974106e-21	0.icl2	Ubc
Synj1	1.15169386286627e-25	-1.16452	0.185	0.314	1.90605334304367e-21	0.icl2	Synj1
Adgre5	1.17086118774718e-25	-0.651677	0.455	0.595	1.93777526572158e-21	0.icl2	Adgre5
Dnajc6	1.18046215286205e-25	1.71965	0.11	0.045	1.9536648629867e-21	0.icl2	Dnajc6
Atp11b	1.34889396127715e-25	0.310845	0.662	0.574	2.23241950591369e-21	0.icl2	Atp11b
Arf5	1.46396206635681e-25	0.348351	0.77	0.711	2.42285721982052e-21	0.icl2	Arf5
Sft2d2	1.53639737224953e-25	-0.881928	0.102	0.214	2.54273765107297e-21	0.icl2	Sft2d2
Plcxd2	1.55081321919157e-25	1.03502	0.255	0.161	2.56659587776205e-21	0.icl2	Plcxd2
Smurf2	1.68269269477267e-25	0.903442	0.392	0.311	2.78485640984876e-21	0.icl2	Smurf2
Tnip1	1.77519802065941e-25	-0.832581	0.22	0.361	2.93795272419133e-21	0.icl2	Tnip1
Elf1	1.79847479505885e-25	0.392298	0.729	0.671	2.9764757858224e-21	0.icl2	Elf1
Adam9	1.80094150357434e-25	-1.8822	0.022	0.093	2.98055818841554e-21	0.icl2	Adam9
Ttc3	1.9286229268682e-25	0.638894	0.44	0.352	3.19187094396687e-21	0.icl2	Ttc3
Zbtb10	1.93194548837477e-25	-1.20452	0.086	0.188	3.19736978326025e-21	0.icl2	Zbtb10
Pde1c	1.98938097405921e-25	-2.95382	0.017	0.083	3.29242551206799e-21	0.icl2	Pde1c
Traf1	2.02625740161574e-25	-0.79946	0.359	0.501	3.35345599967405e-21	0.icl2	Traf1
Dzip1	2.14127304272507e-25	1.7326	0.116	0.049	3.54380688570998e-21	0.icl2	Dzip1
Nfatc3	2.42369426765747e-25	0.519327	0.586	0.522	4.01121401297311e-21	0.icl2	Nfatc3
Pld1	2.53317078752509e-25	-5.86269	0	0.05	4.19239765335402e-21	0.icl2	Pld1
Ptpn3	2.56026628907333e-25	-4.68436	0.003	0.055	4.23724070841636e-21	0.icl2	Ptpn3
Lair1	2.66206190219514e-25	-2.93101	0.028	0.099	4.40571244813296e-21	0.icl2	Lair1
Macir	2.76131477082688e-25	-1.11231	0.076	0.176	4.56997594571848e-21	0.icl2	Macir
Cd300c	2.81849921617234e-25	-5.63543	0.002	0.054	4.66461620276522e-21	0.icl2	Cd300c
Adam22	2.9346862772577e-25	-8.81269	0	0.049	4.85690578886149e-21	0.icl2	Adam22
Mpc1	3.08976740151178e-25	-0.625452	0.307	0.468	5.113565049502e-21	0.icl2	Mpc1
Il9r	3.16387867935507e-25	-6.59645	0	0.05	5.23621921433264e-21	0.icl2	Il9r
Ikbke	3.27288117329057e-25	1.13674	0.216	0.13	5.41661834179589e-21	0.icl2	Ikbke
Emg1	3.3796115799775e-25	0.602619	0.503	0.44	5.59325716486276e-21	0.icl2	Emg1
Il31ra	3.54159429758412e-25	-1.64845	0.173	0.297	5.86133856250171e-21	0.icl2	Il31ra
Chchd3	3.76004878085856e-25	0.575822	0.534	0.47	6.22288073232092e-21	0.icl2	Chchd3
Dlc1	3.88703119209574e-25	-6.35064	0.001	0.051	6.43303662291844e-21	0.icl2	Dlc1
Cd33	4.12921219412249e-25	-5.80003	0.001	0.051	6.83384618127272e-21	0.icl2	Cd33
Rnf180	4.3374276230166e-25	-5.0459	0.002	0.053	7.17844271609247e-21	0.icl2	Rnf180
Ube2h	4.37622394122503e-25	0.411926	0.641	0.577	7.24265062272742e-21	0.icl2	Ube2h
Sap30	4.38010722016884e-25	-1.34096	0.045	0.129	7.24907744937943e-21	0.icl2	Sap30
Ccnl1	4.76480591203485e-25	-0.613671	0.481	0.634	7.88575378441768e-21	0.icl2	Ccnl1
Acot9	4.93113843245959e-25	-1.00999	0.075	0.173	8.16103410572063e-21	0.icl2	Acot9
Pid1	5.14039217382466e-25	-2.27053	0.053	0.136	8.50734904767981e-21	0.icl2	Pid1
Cep170	5.22923959756316e-25	-1.05846	0.107	0.217	8.65439153396702e-21	0.icl2	Cep170
Msrb1	5.7082437682842e-25	-2.66838	0.124	0.231	9.44714343651035e-21	0.icl2	Msrb1
Ubash3b	5.82079614929481e-25	-0.807223	0.237	0.375	9.63341762708291e-21	0.icl2	Ubash3b
Klf10	6.13742094248516e-25	-1.06028	0.117	0.23	1.01574316598129e-20	0.icl2	Klf10
Klrg1	6.17283298100859e-25	-7.13427	0	0.049	1.02160385835692e-20	0.icl2	Klrg1
Phka1	6.52633163127286e-25	-5.23617	0.002	0.052	1.08010788497566e-20	0.icl2	Phka1
Slc7a1	6.67736763312807e-25	-0.757613	0.216	0.351	1.1051043432827e-20	0.icl2	Slc7a1
Ggh	6.87547450670911e-25	-0.997313	0.07	0.167	1.13789103086036e-20	0.icl2	Ggh
Lpgat1	7.02287821307781e-25	-1.12909	0.071	0.168	1.16228634426438e-20	0.icl2	Lpgat1
Fam184b	7.67472829387527e-25	-8.66379	0	0.048	1.27016753263636e-20	0.icl2	Fam184b
Znrf1	8.68025250573111e-25	0.355262	0.541	0.438	1.4365817896985e-20	0.icl2	Znrf1
Ptprs	8.78964958568962e-25	-1.87298	0.039	0.119	1.45468700643163e-20	0.icl2	Ptprs
Ifi208	9.45612761366422e-25	1.56198	0.144	0.071	1.56498912006143e-20	0.icl2	Ifi208
Plcg1	9.68461577656901e-25	0.995374	0.231	0.143	1.60280391102217e-20	0.icl2	Plcg1
Gramd4	1.07377545291645e-24	0.746661	0.38	0.293	1.77709837457673e-20	0.icl2	Gramd4
Tnrc18	1.18315895377475e-24	-1.0303	0.117	0.232	1.95812806849721e-20	0.icl2	Tnrc18
Sik3	1.20162289425725e-24	-0.68726	0.448	0.583	1.98868588999575e-20	0.icl2	Sik3
Atp6v1b2	1.22401490748643e-24	-0.932373	0.129	0.249	2.02574467189004e-20	0.icl2	Atp6v1b2
Il6ra	1.22657949657998e-24	0.593708	0.274	0.176	2.02998906683987e-20	0.icl2	Il6ra
Tasl	1.26210204818043e-24	-1.5615	0.031	0.106	2.08877888973862e-20	0.icl2	Tasl
Sec11a	1.36149581651955e-24	0.514561	0.575	0.53	2.25327557633986e-20	0.icl2	Sec11a
Tgm2	1.37254741120704e-24	-5.75269	0.001	0.051	2.27156596554765e-20	0.icl2	Tgm2
Atp5b	1.42636312004387e-24	0.3412	0.778	0.719	2.3606309636726e-20	0.icl2	Atp5b
Sh2b2	1.43488253008416e-24	-4.99878	0.002	0.052	2.37473058728928e-20	0.icl2	Sh2b2
Arf4	1.4597509502202e-24	-0.543266	0.588	0.703	2.41588782261444e-20	0.icl2	Arf4
Pgam1	1.48738802453871e-24	-0.583606	0.192	0.333	2.46162718061156e-20	0.icl2	Pgam1
Sbno2	1.50944365261662e-24	-1.58186	0.113	0.22	2.49812924508051e-20	0.icl2	Sbno2
Zmynd15	1.57730789692194e-24	-9.38063	0	0.047	2.61044456940581e-20	0.icl2	Zmynd15
Bik	1.7262838609926e-24	-3.76646	0.004	0.056	2.85699978994275e-20	0.icl2	Bik
Itgb5	1.72629087574785e-24	-5.77923	0	0.048	2.85701139936269e-20	0.icl2	Itgb5
Bmp7	1.77061105451056e-24	-3.18685	0.007	0.061	2.93036129521497e-20	0.icl2	Bmp7
Pura	1.80089654777755e-24	0.54472	0.489	0.421	2.98048378657184e-20	0.icl2	Pura
Arl11	1.81484303472093e-24	-5.28792	0.001	0.05	3.00356522246313e-20	0.icl2	Arl11
Sh3bp5	1.8764660900707e-24	0.666448	0.342	0.246	3.10555137906702e-20	0.icl2	Sh3bp5
Ctdsp2	1.9127835239402e-24	-0.772322	0.084	0.188	3.16565673212103e-20	0.icl2	Ctdsp2
Sort1	2.21481944911406e-24	-3.03893	0.013	0.073	3.66552618828376e-20	0.icl2	Sort1
Tifa	2.2589407168028e-24	-1.70576	0.019	0.085	3.73854688630863e-20	0.icl2	Tifa
Nampt	2.29728621381641e-24	-1.25528	0.11	0.217	3.80200868386616e-20	0.icl2	Nampt
Eif4e3	2.47204361681548e-24	-1.38747	0.033	0.109	4.09123218582962e-20	0.icl2	Eif4e3
Glipr1	2.49335990637833e-24	-0.806218	0.218	0.354	4.12651064505614e-20	0.icl2	Glipr1
Siglech	2.51397283603588e-24	-6.07338	0.007	0.061	4.16062504363938e-20	0.icl2	Siglech
Hes1	2.57662094695938e-24	-2.14676	0.015	0.078	4.26430766721778e-20	0.icl2	Hes1
Ifitm6	2.58476713237843e-24	-8.43133	0	0.048	4.27778960408631e-20	0.icl2	Ifitm6
Fcmr	2.6072004554675e-24	-7.15274	0.001	0.049	4.31491675379872e-20	0.icl2	Fcmr
Ech1	2.64908980666752e-24	-0.584735	0.183	0.322	4.38424363003474e-20	0.icl2	Ech1
Rps21	2.74330432469207e-24	0.216856	0.996	0.906	4.54016865736538e-20	0.icl2	Rps21
Rab32	2.83364502668044e-24	-2.00287	0.022	0.089	4.68968251915613e-20	0.icl2	Rab32
Csf1	2.85362471884876e-24	-5.73452	0.003	0.054	4.7227489096947e-20	0.icl2	Csf1
Ranbp9	3.11670648646012e-24	0.518635	0.504	0.436	5.1581492350915e-20	0.icl2	Ranbp9
Nrip1	3.19365714963202e-24	0.433246	0.52	0.427	5.285502582641e-20	0.icl2	Nrip1
Phf11c	3.38195507581133e-24	1.73045	0.119	0.053	5.59713565046776e-20	0.icl2	Phf11c
Lag3	3.50725815471929e-24	-3.54025	0.005	0.058	5.80451224606042e-20	0.icl2	Lag3
Smad3	3.69446685106775e-24	-0.744176	0.242	0.376	6.11434263851713e-20	0.icl2	Smad3
Rps25	4.18734386152281e-24	0.217258	0.982	0.885	6.93005409082025e-20	0.icl2	Rps25
Hcar2	4.31940289075471e-24	-6.99048	0.001	0.049	7.14861178419904e-20	0.icl2	Hcar2
Zdhhc2	4.35065516258386e-24	-2.51129	0.011	0.07	7.20033429407629e-20	0.icl2	Zdhhc2
Naip6	4.51255453682501e-24	-6.34905	0.001	0.049	7.4682777584454e-20	0.icl2	Naip6
Clec4e	4.67041729709054e-24	-6.33909	0.003	0.053	7.72954062668485e-20	0.icl2	Clec4e
Usp3	5.54212025224908e-24	0.551875	0.546	0.477	9.17220901747222e-20	0.icl2	Usp3
Cnga1	5.59879225378712e-24	2.27087	0.059	0.015	9.26600118001768e-20	0.icl2	Cnga1
Zyx	5.7474210570305e-24	-0.613261	0.283	0.434	9.51198184938548e-20	0.icl2	Zyx
Igtp	6.24700487117073e-24	1.26217	0.185	0.105	1.03387930617876e-19	0.icl2	Igtp
Tec	6.28286732120065e-24	-0.887179	0.204	0.333	1.03981454165871e-19	0.icl2	Tec
Smim5	7.04849046760327e-24	-5.41232	0.002	0.05	1.16652517238834e-19	0.icl2	Smim5
Qrfp	7.2419909743011e-24	-1.88526	0.019	0.084	1.19854950624683e-19	0.icl2	Qrfp
Selenon	7.72913535325725e-24	-3.11893	0.006	0.059	1.27917190096408e-19	0.icl2	Selenon
Nr1d2	7.99380143515069e-24	-0.969024	0.077	0.175	1.32297413751744e-19	0.icl2	Nr1d2
Bbc3	8.26780089290453e-24	-1.21302	0.051	0.135	1.3683210477757e-19	0.icl2	Bbc3
Hexb	8.53643181669775e-24	-1.25565	0.391	0.543	1.41277946566348e-19	0.icl2	Hexb
Tmem37	8.76438075507881e-24	-3.61524	0.004	0.054	1.45050501496554e-19	0.icl2	Tmem37
Cttnbp2nl	8.9344283439821e-24	-7.09215	0	0.047	1.47864789092904e-19	0.icl2	Cttnbp2nl
Zfyve9	9.40819933436559e-24	-5.26313	0.001	0.049	1.55705698983751e-19	0.icl2	Zfyve9
Arl5a	9.67828582101477e-24	-0.977309	0.114	0.223	1.60175630337794e-19	0.icl2	Arl5a
Srgap2	1.00172438344696e-23	-0.678279	0.184	0.319	1.65785385460472e-19	0.icl2	Srgap2
Marchf8	1.10146227707896e-23	-3.57449	0.004	0.055	1.82292006856569e-19	0.icl2	Marchf8
Map3k20	1.3056493432712e-23	-3.96104	0.003	0.052	2.16084966311383e-19	0.icl2	Map3k20
Rpl38	1.34927505790516e-23	0.205562	0.995	0.908	2.23305022083304e-19	0.icl2	Rpl38
Gstm1	1.58518086816613e-23	-2.51412	0.008	0.063	2.62347433681495e-19	0.icl2	Gstm1
Tet2	1.6211529053564e-23	-0.953417	0.182	0.307	2.68300805836484e-19	0.icl2	Tet2
Pde8a	1.69810920048402e-23	-1.60708	0.034	0.107	2.81037072680105e-19	0.icl2	Pde8a
Tcirg1	1.72566966166293e-23	-1.78105	0.047	0.128	2.85598329005215e-19	0.icl2	Tcirg1
B2m	1.83709173814501e-23	0.143268	0.996	0.936	3.04038682663e-19	0.icl2	B2m
Hfe	1.92501483643731e-23	-4.63593	0.002	0.051	3.18589955430375e-19	0.icl2	Hfe
Mxi1	1.97955209700952e-23	-1.78581	0.061	0.146	3.27615872055075e-19	0.icl2	Mxi1
Myo1d	2.03644457089865e-23	-2.86506	0.015	0.075	3.37031576483727e-19	0.icl2	Myo1d
Adgre4	2.06243779077414e-23	-5.75125	0.003	0.051	3.4133345437312e-19	0.icl2	Adgre4
Mpp7	2.07184846248206e-23	-1.38152	0.202	0.319	3.4289092054078e-19	0.icl2	Mpp7
Tceal9	2.17979683583846e-23	-0.725143	0.111	0.222	3.60756376331265e-19	0.icl2	Tceal9
Igsf8	2.31223454581125e-23	-1.70861	0.017	0.079	3.82674817331761e-19	0.icl2	Igsf8
Kdm4d	2.51977481363923e-23	-1.66188	0.026	0.094	4.17022731657293e-19	0.icl2	Kdm4d
Cd79a	2.53666862299684e-23	-6.13988	0.006	0.058	4.19818657105977e-19	0.icl2	Cd79a
Spns3	2.54227871381746e-23	-2.52345	0.021	0.085	4.2074712713679e-19	0.icl2	Spns3
Nrxn1	2.57602493913519e-23	-7.28587	0.004	0.053	4.26332127426874e-19	0.icl2	Nrxn1
Dna2	2.73882700366372e-23	-3.69745	0.005	0.055	4.53275869106345e-19	0.icl2	Dna2
Gla	2.77665124190289e-23	-1.36448	0.091	0.187	4.59535780534927e-19	0.icl2	Gla
Capn2	2.83378409423952e-23	-0.843318	0.077	0.173	4.68991267596641e-19	0.icl2	Capn2
Clec4a3	2.95761598584113e-23	-6.8086	0	0.046	4.89485445656708e-19	0.icl2	Clec4a3
Cd69	3.18677855403263e-23	0.561939	0.527	0.423	5.274118506924e-19	0.icl2	Cd69
H2-Eb2	3.23772922039041e-23	-5.11108	0.001	0.048	5.35844185974614e-19	0.icl2	H2-Eb2
Hcfc1r1	3.40646576891351e-23	-0.652736	0.13	0.249	5.63770084755186e-19	0.icl2	Hcfc1r1
Zmiz2	3.59830602050893e-23	-0.960462	0.145	0.265	5.95519646394228e-19	0.icl2	Zmiz2
Klra2	3.6035255833017e-23	-5.40536	0.002	0.05	5.96383484036431e-19	0.icl2	Klra2
F11r	3.67560006152283e-23	-4.97249	0.003	0.051	6.08311810182028e-19	0.icl2	F11r
Cd300lb	3.73446979576677e-23	-6.9405	0	0.046	6.18054751199401e-19	0.icl2	Cd300lb
Ifi205	3.74089114306283e-23	-6.91225	0	0.046	6.19117484176898e-19	0.icl2	Ifi205
Ccr10	3.77964962974512e-23	-6.5726	0	0.046	6.25532013722818e-19	0.icl2	Ccr10
Tubb6	4.10953063491033e-23	-4.81388	0.001	0.047	6.8012732007766e-19	0.icl2	Tubb6
Mrpl58	4.12006262891251e-23	0.804956	0.373	0.297	6.81870365085021e-19	0.icl2	Mrpl58
Cxcr2	4.1606365657027e-23	-5.81392	0.003	0.051	6.88585351623796e-19	0.icl2	Cxcr2
Akr1b3	4.77122613675864e-23	0.670778	0.469	0.407	7.89637925633554e-19	0.icl2	Akr1b3
Rab7b	4.9071523679602e-23	-6.73506	0.001	0.047	8.12133716897413e-19	0.icl2	Rab7b
Iqsec1	4.92379776796593e-23	-1.10656	0.135	0.247	8.14888530598361e-19	0.icl2	Iqsec1
Arhgef10l	4.9688707310586e-23	-6.09697	0.001	0.047	8.22348105990198e-19	0.icl2	Arhgef10l
Csf2	5.14967415005476e-23	-4.6385	0.002	0.049	8.52271071834063e-19	0.icl2	Csf2
Ly6g5b	5.20777338545404e-23	-2.87654	0.009	0.063	8.61886495292644e-19	0.icl2	Ly6g5b
Adm	5.23903238131083e-23	-4.39714	0.004	0.053	8.67059859106943e-19	0.icl2	Adm
Tmed9	5.68537556529825e-23	0.445285	0.628	0.591	9.4092965605686e-19	0.icl2	Tmed9
Cep97	5.74679090291689e-23	1.24989	0.182	0.105	9.51093894432745e-19	0.icl2	Cep97
Mapk3	5.83355075335353e-23	-0.973527	0.069	0.16	9.65452649680008e-19	0.icl2	Mapk3
Vars	6.75711886899794e-23	-0.717561	0.143	0.264	1.11830317281916e-18	0.icl2	Vars
Pals2	6.97806472083919e-23	-0.747281	0.112	0.22	1.15486971129889e-18	0.icl2	Pals2
Rilpl2	7.06892370760656e-23	-0.996166	0.161	0.278	1.16990687360889e-18	0.icl2	Rilpl2
Niban2	7.08133837063808e-23	-4.29966	0.002	0.048	1.1719615003406e-18	0.icl2	Niban2
Prrg1	7.80955859742645e-23	1.47458	0.129	0.061	1.29248194787408e-18	0.icl2	Prrg1
Nabp1	8.1710589819307e-23	-0.790204	0.302	0.435	1.35231026150953e-18	0.icl2	Nabp1
Cd48	8.59529307934276e-23	0.453756	0.586	0.518	1.42252100463123e-18	0.icl2	Cd48
Azin1	8.59986518599091e-23	-0.666621	0.215	0.353	1.4232776882815e-18	0.icl2	Azin1
P2ry6	9.25552357738881e-23	-7.76039	0	0.044	1.53178915205785e-18	0.icl2	P2ry6
Fuca2	9.32651425538843e-23	-0.868055	0.061	0.148	1.54353810926678e-18	0.icl2	Fuca2
Plin3	9.34171447137289e-23	-0.957565	0.072	0.163	1.54605374501221e-18	0.icl2	Plin3
Htra2	9.74357564058793e-23	-1.54218	0.051	0.132	1.6125617685173e-18	0.icl2	Htra2
Nr2f6	9.83711172926606e-23	-2.38151	0.011	0.067	1.62804199119353e-18	0.icl2	Nr2f6
Arg2	1.01619096860585e-22	-4.69572	0.002	0.048	1.68179605304268e-18	0.icl2	Arg2
Paxbp1	1.03353719017735e-22	-1.35193	0.209	0.333	1.71050404974351e-18	0.icl2	Paxbp1
Ksr1	1.09984115274963e-22	-1.15262	0.064	0.15	1.82023710780064e-18	0.icl2	Ksr1
Colgalt2	1.17544445515181e-22	-7.65622	0	0.044	1.94536057327625e-18	0.icl2	Colgalt2
Slc16a3	1.44086645122196e-22	-4.95386	0.004	0.053	2.38463397677234e-18	0.icl2	Slc16a3
Retnlg	1.45454962945409e-22	-7.92988	0.006	0.056	2.40727963674651e-18	0.icl2	Retnlg
Grk6	1.49208829541371e-22	0.750895	0.362	0.286	2.46940612890969e-18	0.icl2	Grk6
Hmox1	1.6514354673952e-22	-5.24861	0.002	0.048	2.73312569853906e-18	0.icl2	Hmox1
Dnajb14	1.66328157701642e-22	-1.07606	0.061	0.148	2.75273100996217e-18	0.icl2	Dnajb14
Ric1	1.80522561547198e-22	-0.877156	0.185	0.308	2.98764839360612e-18	0.icl2	Ric1
Ugcg	1.84238798401787e-22	0.215778	0.626	0.504	3.04915211354958e-18	0.icl2	Ugcg
Aldh3b1	1.88725122092895e-22	-2.83824	0.006	0.057	3.12340077063741e-18	0.icl2	Aldh3b1
Gzma	1.95427065683974e-22	-5.02721	0.072	0.149	3.23431793706976e-18	0.icl2	Gzma
Pax5	1.96521575024866e-22	-7.27428	0	0.044	3.25243206666153e-18	0.icl2	Pax5
Ccdc28b	1.98292807566781e-22	-1.54906	0.033	0.105	3.28174596523022e-18	0.icl2	Ccdc28b
Klri1	2.05869540544167e-22	-5.32909	0.002	0.047	3.40714089600596e-18	0.icl2	Klri1
Tlr2	2.10258709900854e-22	-3.76857	0.006	0.055	3.47978164885913e-18	0.icl2	Tlr2
Bri3bp	2.1213896595691e-22	-1.07849	0.069	0.159	3.51089988658686e-18	0.icl2	Bri3bp
Spred2	2.12544657610048e-22	1.02621	0.251	0.166	3.51761408344629e-18	0.icl2	Spred2
Erlin1	2.36211937941645e-22	-2.52687	0.017	0.077	3.90930757293423e-18	0.icl2	Erlin1
Irf2bp2	2.44872054655218e-22	-0.680576	0.287	0.421	4.05263250454386e-18	0.icl2	Irf2bp2
Aqp3	2.47769007524401e-22	-1.59669	0.028	0.095	4.10057707452884e-18	0.icl2	Aqp3
Clec4a2	2.55040493806137e-22	-6.40872	0	0.044	4.22092017249157e-18	0.icl2	Clec4a2
Clec10a	2.67509495666915e-22	-5.6766	0.001	0.045	4.42728215328745e-18	0.icl2	Clec10a
Ccdc122	2.68053434360231e-22	-2.59331	0.011	0.066	4.43628433866182e-18	0.icl2	Ccdc122
Nrp2	2.87532756683374e-22	-3.73599	0.027	0.092	4.75866712310983e-18	0.icl2	Nrp2
Trib1	2.90843277894183e-22	-1.87631	0.052	0.13	4.81345624914872e-18	0.icl2	Trib1
Spacdr	2.94187373171432e-22	0.503419	0.541	0.482	4.8688010259872e-18	0.icl2	Spacdr
Tnfrsf21	3.08234121433902e-22	-2.12831	0.015	0.073	5.10127470973108e-18	0.icl2	Tnfrsf21
Mapk6	3.22874573055061e-22	-0.776561	0.238	0.37	5.34357418406126e-18	0.icl2	Mapk6
Far1	3.23796725417774e-22	-0.707844	0.183	0.311	5.35883580566416e-18	0.icl2	Far1
Il1rn	3.27714067195942e-22	-6.4124	0	0.044	5.42366781209284e-18	0.icl2	Il1rn
Ctse	3.39158921916639e-22	0.797506	0.374	0.292	5.61308015772037e-18	0.icl2	Ctse
Slc46a3	3.50088157632346e-22	-1.99756	0.03	0.097	5.79395900881533e-18	0.icl2	Slc46a3
Rasa1	3.50305310960223e-22	0.543452	0.479	0.403	5.7975528963917e-18	0.icl2	Rasa1
St6galnac3	3.61518397063818e-22	-1.27149	0.374	0.449	5.98312947140618e-18	0.icl2	St6galnac3
Nr1d1	3.78212519240064e-22	-3.7977	0.003	0.049	6.25941719342306e-18	0.icl2	Nr1d1
Tgoln1	3.84687195317781e-22	-0.542374	0.273	0.422	6.36657308250927e-18	0.icl2	Tgoln1
Cyb5r3	3.88806755628575e-22	-0.878629	0.084	0.179	6.43475180565292e-18	0.icl2	Cyb5r3
Bcl3	4.02242344643354e-22	-1.45081	0.04	0.114	6.6571108038475e-18	0.icl2	Bcl3
Prrc2c	4.14338081382251e-22	0.246061	0.795	0.739	6.85729524687625e-18	0.icl2	Prrc2c
Ipmk	4.24258293351506e-22	-1.35754	0.06	0.143	7.02147475496743e-18	0.icl2	Ipmk
Tmem205	4.27250547531055e-22	-5.28418	0	0.044	7.07099656163896e-18	0.icl2	Tmem205
Orai3	4.32753789266838e-22	-1.26872	0.034	0.106	7.16207521236617e-18	0.icl2	Orai3
Fam174a	4.35556936973355e-22	-0.81891	0.106	0.209	7.20846730690903e-18	0.icl2	Fam174a
Vsig10	4.37790982274357e-22	-4.70605	0.002	0.048	7.2454407566406e-18	0.icl2	Vsig10
Cd53	4.50129215470273e-22	0.292285	0.779	0.718	7.44963851603302e-18	0.icl2	Cd53
Xbp1	4.90502542274296e-22	-0.8864	0.115	0.219	8.1178170746396e-18	0.icl2	Xbp1
Fbrsl1	5.03829446906692e-22	-1.08397	0.154	0.271	8.33837734630576e-18	0.icl2	Fbrsl1
Tnfrsf1a	5.0768882660137e-22	-1.39805	0.043	0.118	8.40225008025267e-18	0.icl2	Tnfrsf1a
Ptpn13	5.29391981612687e-22	-2.843	0.015	0.071	8.76143729568997e-18	0.icl2	Ptpn13
L1cam	5.86203045211965e-22	-2.37077	0.016	0.074	9.70166039825802e-18	0.icl2	L1cam
Frmd5	6.16176788687078e-22	-5.46434	0.003	0.048	1.01977258527711e-17	0.icl2	Frmd5
Mitf	6.18990596250198e-22	-1.77839	0.021	0.082	1.02442943679408e-17	0.icl2	Mitf
Srgn	6.31525485726499e-22	-0.694547	0.909	0.885	1.04517467887736e-17	0.icl2	Srgn
As3mt	6.40641702919123e-22	-1.53883	0.04	0.113	1.06026201833115e-17	0.icl2	As3mt
Pde4dip	6.42152590701695e-22	-1.60081	0.066	0.151	1.0627625376113e-17	0.icl2	Pde4dip
Acod1	6.44075895577548e-22	-7.46211	0.001	0.045	1.06594560718084e-17	0.icl2	Acod1
Lamp2	6.44519465425008e-22	-0.812056	0.193	0.319	1.06667971527839e-17	0.icl2	Lamp2
Tmem150c	6.52543817938146e-22	-6.9105	0.001	0.044	1.07996001868763e-17	0.icl2	Tmem150c
Cdkn2d	6.8978757894874e-22	0.777437	0.35	0.268	1.14159844316016e-17	0.icl2	Cdkn2d
Kcnk10	7.13706790487758e-22	-5.33793	0.001	0.044	1.18118473825724e-17	0.icl2	Kcnk10
B4galt6	7.44645102090067e-22	-3.49215	0.001	0.045	1.23238764395906e-17	0.icl2	B4galt6
Ifit1	7.47954780740298e-22	1.31739	0.101	0.042	1.23786516212519e-17	0.icl2	Ifit1
Ccnd2	7.63820757941288e-22	0.453138	0.534	0.445	1.26412335439283e-17	0.icl2	Ccnd2
Ms4a1	8.04765440625832e-22	-4.75686	0.006	0.055	1.33188680423575e-17	0.icl2	Ms4a1
Areg	8.06472256791307e-22	-4.13261	0.009	0.06	1.33471158498961e-17	0.icl2	Areg
Ppp1r13b	8.11633599662494e-22	0.858315	0.329	0.252	1.34325360744143e-17	0.icl2	Ppp1r13b
Ifi27	8.50389194980683e-22	0.647814	0.449	0.373	1.40739411769303e-17	0.icl2	Ifi27
Carhsp1	8.80970563491963e-22	-2.0138	0.017	0.076	1.4580062825792e-17	0.icl2	Carhsp1
Tmbim1	9.36991267275706e-22	-2.66214	0.008	0.06	1.55072054734129e-17	0.icl2	Tmbim1
Slc6a13	9.43222886906121e-22	-4.61899	0.001	0.045	1.56103387782963e-17	0.icl2	Slc6a13
Hivep3	9.67580637416542e-22	-1.20913	0.056	0.137	1.60134595492438e-17	0.icl2	Hivep3
Grm8	9.75288507649326e-22	-6.97227	0.002	0.046	1.61410248015963e-17	0.icl2	Grm8
Gpm6b	9.77225125998862e-22	-5.22754	0.003	0.048	1.61730758352812e-17	0.icl2	Gpm6b
Tgtp1	9.81992709119846e-22	2.02438	0.074	0.026	1.62519793359335e-17	0.icl2	Tgtp1
Slc43a2	9.94026151404926e-22	0.832759	0.313	0.229	1.64511328057515e-17	0.icl2	Slc43a2
Borcs7	1.06199804392112e-21	-1.06811	0.063	0.147	1.75760676268946e-17	0.icl2	Borcs7
Klra17	1.08229147245542e-21	-4.78394	0.002	0.047	1.79119238691373e-17	0.icl2	Klra17
Frmd4a	1.08822167241086e-21	-1.82317	0.052	0.129	1.80100686783997e-17	0.icl2	Frmd4a
Slc35c2	1.10071772191602e-21	-1.06133	0.066	0.153	1.82168782977102e-17	0.icl2	Slc35c2
Immp2l	1.13336024286346e-21	-0.683269	0.224	0.347	1.87571120193903e-17	0.icl2	Immp2l
S100a8	1.20326630484139e-21	-6.38592	0.027	0.089	1.99140573451251e-17	0.icl2	S100a8
Rtp4	1.27418369872136e-21	1.08102	0.182	0.105	2.10877402138385e-17	0.icl2	Rtp4
Glud1	1.2772029306696e-21	-0.553794	0.332	0.482	2.11377085025819e-17	0.icl2	Glud1
Dusp10	1.30653454179571e-21	0.797202	0.35	0.266	2.1623146666719e-17	0.icl2	Dusp10
Prkra	1.31798418357929e-21	-1.66533	0.022	0.084	2.18126382382372e-17	0.icl2	Prkra
Slc4a8	1.3773399901816e-21	-3.9576	0.017	0.074	2.27949768375055e-17	0.icl2	Slc4a8
Amz1	1.44448584534633e-21	-5.53598	0.002	0.046	2.39062407404817e-17	0.icl2	Amz1
Tcf20	1.54426654457809e-21	0.495697	0.513	0.448	2.55576113127673e-17	0.icl2	Tcf20
Fdx1	1.60962843656466e-21	-0.677986	0.084	0.181	2.66393506251451e-17	0.icl2	Fdx1
Jakmip1	1.72824122213073e-21	0.848055	0.324	0.242	2.86023922262636e-17	0.icl2	Jakmip1
Nucb1	2.02757878176314e-21	-0.606187	0.134	0.248	3.355642883818e-17	0.icl2	Nucb1
Arhgap9	2.07077181974797e-21	0.659279	0.427	0.358	3.42712736168289e-17	0.icl2	Arhgap9
Bank1	2.13637429059921e-21	-4.03008	0.012	0.064	3.5356994509417e-17	0.icl2	Bank1
Fam83a	2.14172081589535e-21	-6.23442	0	0.042	3.54454795030681e-17	0.icl2	Fam83a
Slc28a2	2.17947325490781e-21	0.902672	0.262	0.177	3.60702823687243e-17	0.icl2	Slc28a2
Cma1	2.19773856439295e-21	-6.65208	0.001	0.043	3.63725732407033e-17	0.icl2	Cma1
Mfsd6	2.23785123050166e-21	-0.913153	0.086	0.179	3.70364378648025e-17	0.icl2	Mfsd6
mt-Cytb	2.38890146536665e-21	-0.284251	0.999	0.96	3.95363192518181e-17	0.icl2	mt-Cytb
Tdrd7	2.46254209743452e-21	-1.73975	0.026	0.089	4.07550717125413e-17	0.icl2	Tdrd7
Dnajc15	2.60776293077314e-21	0.499175	0.558	0.497	4.31584765042955e-17	0.icl2	Dnajc15
Rpl24	2.83687179520424e-21	0.195769	0.991	0.899	4.69502282106302e-17	0.icl2	Rpl24
Sesn1	2.87870021030549e-21	0.747654	0.487	0.423	4.76424884805558e-17	0.icl2	Sesn1
St3gal3	3.14152805737161e-21	-1.02925	0.106	0.204	5.19922893495001e-17	0.icl2	St3gal3
Rragc	3.21579067515811e-21	-0.983047	0.096	0.193	5.32213356738667e-17	0.icl2	Rragc
Dkkl1	3.2392472441053e-21	-3.71473	0.002	0.046	5.36095418899427e-17	0.icl2	Dkkl1
Nat9	3.3035967713085e-21	-1.84773	0.021	0.082	5.46745265651558e-17	0.icl2	Nat9
Slc11a1	3.31760062605913e-21	-8.2632	0	0.041	5.49062903612786e-17	0.icl2	Slc11a1
Nfic	3.40213133485598e-21	-0.89082	0.071	0.16	5.63052735918665e-17	0.icl2	Nfic
Map2k3	3.40280693872118e-21	-0.968351	0.072	0.16	5.63164548358356e-17	0.icl2	Map2k3
Nfat5	3.47437225511474e-21	-0.839899	0.267	0.396	5.7500860822149e-17	0.icl2	Nfat5
Trem1	3.47674455978454e-21	-7.10239	0	0.042	5.75401224644342e-17	0.icl2	Trem1
Cracr2a	3.49016257043685e-21	0.856038	0.282	0.197	5.77621905407299e-17	0.icl2	Cracr2a
Clec4a1	3.78111503000791e-21	-4.5389	0.002	0.045	6.25774537466309e-17	0.icl2	Clec4a1
Dstn	4.19767340414195e-21	-1.20947	0.094	0.188	6.94714948385493e-17	0.icl2	Dstn
Msn	4.58573788131869e-21	0.335547	0.75	0.712	7.58939619358243e-17	0.icl2	Msn
Ybx3	4.65534661236749e-21	-0.714069	0.175	0.292	7.7045986434682e-17	0.icl2	Ybx3
Hilpda	4.95742717320131e-21	-1.97091	0.068	0.149	8.20454197164817e-17	0.icl2	Hilpda
Micu1	5.14007027318025e-21	-1.02235	0.107	0.205	8.50681630211331e-17	0.icl2	Micu1
Casp3	5.61570182993081e-21	-1.08782	0.072	0.158	9.29398652853549e-17	0.icl2	Casp3
Sirpd	5.68871112227165e-21	-6.31611	0	0.041	9.41481690735959e-17	0.icl2	Sirpd
Pea15a	6.01473227644172e-21	-0.913192	0.118	0.222	9.95438191751104e-17	0.icl2	Pea15a
Pik3r6	6.22971970903307e-21	-4.95274	0.001	0.043	1.03101861184497e-16	0.icl2	Pik3r6
Arap3	6.33541446989753e-21	-3.32513	0.006	0.053	1.04851109476804e-16	0.icl2	Arap3
Rnf130	6.39752908958605e-21	-0.682369	0.216	0.345	1.05879106432649e-16	0.icl2	Rnf130
C130026I21Rik	6.49491555362257e-21	-2.43643	0.014	0.068	1.07490852412454e-16	0.icl2	C130026I21Rik
Slpi	6.7106557807315e-21	-4.84721	0.025	0.085	1.11061353171106e-16	0.icl2	Slpi
Rgl1	6.81203136609127e-21	-1.49952	0.038	0.107	1.12739119108811e-16	0.icl2	Rgl1
Ahcyl2	6.8375878575866e-21	-0.661232	0.292	0.425	1.13162079043058e-16	0.icl2	Ahcyl2
Ivns1abp	7.06907500086911e-21	-0.749248	0.281	0.418	1.16993191264384e-16	0.icl2	Ivns1abp
Hs3st1	7.15258502866176e-21	-6.47654	0	0.041	1.18375282224352e-16	0.icl2	Hs3st1
Lrp1	7.48355995312713e-21	-5.24506	0.002	0.044	1.23852917224254e-16	0.icl2	Lrp1
Iftap	7.71022662502628e-21	-2.92778	0.004	0.05	1.27604250644185e-16	0.icl2	Iftap
Rpl27a	8.36447626743852e-21	0.187052	0.997	0.925	1.38432082226108e-16	0.icl2	Rpl27a
Kif1b	8.44699406356662e-21	-0.74927	0.191	0.313	1.39797751752028e-16	0.icl2	Kif1b
Tmbim4	8.70116510276681e-21	-0.492755	0.29	0.442	1.44004282450791e-16	0.icl2	Tmbim4
Hspa1b	8.78185770762069e-21	0.331891	0.771	0.672	1.45339745061122e-16	0.icl2	Hspa1b
Pltp	8.99301333324144e-21	-3.18331	0.014	0.067	1.48834370665146e-16	0.icl2	Pltp
Ifit3	9.14877612866681e-21	1.41251	0.097	0.041	1.51412244929436e-16	0.icl2	Ifit3
Tspan32	9.54754568388367e-21	0.865761	0.304	0.22	1.58011881068275e-16	0.icl2	Tspan32
Il2rg	9.78790372393382e-21	0.375747	0.647	0.583	1.61989806631105e-16	0.icl2	Il2rg
Heatr9	1.08752606853234e-20	-2.83423	0.009	0.058	1.79985564342103e-16	0.icl2	Heatr9
Tlk1	1.16172211330194e-20	0.596096	0.459	0.404	1.92265009751471e-16	0.icl2	Tlk1
Fcgrt	1.23513651075991e-20	-2.74463	0.008	0.057	2.04415092530765e-16	0.icl2	Fcgrt
Dclre1c	1.275344231244e-20	-1.1032	0.132	0.234	2.11069470270883e-16	0.icl2	Dclre1c
Sipa1l3	1.27951304317338e-20	-0.968545	0.088	0.18	2.11759408645195e-16	0.icl2	Sipa1l3
Zfp385a	1.30188586549167e-20	-4.66471	0.002	0.044	2.15462110738872e-16	0.icl2	Zfp385a
Ifi209	1.31480558598106e-20	0.811817	0.383	0.313	2.17600324479865e-16	0.icl2	Ifi209
Tlr1	1.33562611917871e-20	1.34468	0.12	0.059	2.21046122724076e-16	0.icl2	Tlr1
Spaca9	1.35232551240085e-20	-2.84861	0.003	0.047	2.23809872302341e-16	0.icl2	Spaca9
Adipor1	1.37724878191958e-20	-0.884238	0.183	0.304	2.2793467340769e-16	0.icl2	Adipor1
Mycl	1.50508192527633e-20	-6.08757	0	0.041	2.49091058633233e-16	0.icl2	Mycl
Nagk	1.66024940783372e-20	-1.13928	0.043	0.116	2.74771276996481e-16	0.icl2	Nagk
Adora2a	1.75750339687254e-20	-1.26612	0.067	0.148	2.90866812182405e-16	0.icl2	Adora2a
Hacd4	1.82862941283567e-20	-3.54249	0.008	0.056	3.02638167824303e-16	0.icl2	Hacd4
Gm21762	1.83823640697497e-20	-5.45055	0.002	0.043	3.04228125354357e-16	0.icl2	Gm21762
B4galnt1	1.85344606702953e-20	0.603826	0.473	0.415	3.06745324093387e-16	0.icl2	B4galnt1
Psd2	1.85433290268272e-20	-6.21787	0	0.04	3.06892095393991e-16	0.icl2	Psd2
Cyba	1.87344255587672e-20	-0.440613	0.858	0.853	3.10054742997597e-16	0.icl2	Cyba
Herc3	1.91370872082776e-20	0.773813	0.352	0.277	3.16718793296994e-16	0.icl2	Herc3
Calhm2	1.96580421112764e-20	-1.4227	0.027	0.09	3.25340596941625e-16	0.icl2	Calhm2
Bmp2	2.00965970900102e-20	-4.9731	0.001	0.041	3.32598681839669e-16	0.icl2	Bmp2
Mitd1	2.01049565003706e-20	1.06265	0.258	0.181	3.32737030081133e-16	0.icl2	Mitd1
Uqcrh	2.03633280393554e-20	0.2399	0.917	0.826	3.37013079051333e-16	0.icl2	Uqcrh
Ssbp3	2.13448087515388e-20	0.754391	0.378	0.304	3.53256584837967e-16	0.icl2	Ssbp3
Gabpb1	2.15799422721696e-20	-0.755931	0.175	0.29	3.57148044604406e-16	0.icl2	Gabpb1
Tspo	2.19232436413042e-20	-0.46826	0.693	0.745	3.62829682263585e-16	0.icl2	Tspo
Cdh10	2.3438731462193e-20	-6.5318	0	0.04	3.87911005699293e-16	0.icl2	Cdh10
Cntln	2.35303499529233e-20	-1.94252	0.018	0.074	3.89427291720881e-16	0.icl2	Cntln
Deptor	2.35915343949083e-20	-2.42379	0.009	0.058	3.90439894235732e-16	0.icl2	Deptor
Zfp644	2.41003511632799e-20	0.503092	0.52	0.472	3.98860811752282e-16	0.icl2	Zfp644
Atp1a3	2.44133660683852e-20	-4.23249	0.003	0.045	4.04041208431775e-16	0.icl2	Atp1a3
Ctla2b	2.5764046240963e-20	-2.41747	0.011	0.061	4.26394965287937e-16	0.icl2	Ctla2b
Add1	2.59903801540984e-20	0.662376	0.418	0.353	4.30140791550329e-16	0.icl2	Add1
Zcchc7	2.7219543458387e-20	0.272228	0.73	0.677	4.50483444236304e-16	0.icl2	Zcchc7
Spty2d1	2.74339802626591e-20	-0.806553	0.171	0.285	4.54032373347008e-16	0.icl2	Spty2d1
Septin6	2.82226989062646e-20	0.598556	0.498	0.449	4.67085666898678e-16	0.icl2	Septin6
Ccl9	2.8239670056736e-20	-8.84649	0	0.039	4.67366539438981e-16	0.icl2	Ccl9
Frmd8	2.93384052631519e-20	1.07116	0.235	0.161	4.85550607105164e-16	0.icl2	Frmd8
Etnk1	2.9376241021757e-20	0.548443	0.466	0.4	4.86176788910079e-16	0.icl2	Etnk1
Rhoc	3.01945590691766e-20	-3.02259	0.007	0.054	4.99719952594873e-16	0.icl2	Rhoc
Sec24d	3.14727117335304e-20	-1.13613	0.043	0.114	5.20873379189928e-16	0.icl2	Sec24d
Lyl1	3.55700655824056e-20	-3.50684	0.002	0.044	5.88684585388813e-16	0.icl2	Lyl1
Agtrap	3.55989938499267e-20	-0.897293	0.053	0.131	5.89163348216288e-16	0.icl2	Agtrap
Ceacam1	3.58161054113056e-20	-7.46705	0	0.039	5.92756544557108e-16	0.icl2	Ceacam1
Def6	3.87685032087891e-20	0.795728	0.341	0.266	6.4161872810546e-16	0.icl2	Def6
Myo5b	3.88461044836005e-20	-5.70381	0.002	0.043	6.42903029203588e-16	0.icl2	Myo5b
Tapbpl	3.91660849403913e-20	0.913824	0.31	0.236	6.48198705763477e-16	0.icl2	Tapbpl
S100a9	4.00793982441472e-20	-6.71654	0.046	0.115	6.63314040940637e-16	0.icl2	S100a9
Alpk1	4.13464726962578e-20	-2.8673	0.012	0.062	6.84284123123067e-16	0.icl2	Alpk1
Pafah1b3	4.13670003960142e-20	-0.996606	0.084	0.172	6.84623856554036e-16	0.icl2	Pafah1b3
Myof	4.54227747291522e-20	-7.87871	0	0.038	7.51746921767469e-16	0.icl2	Myof
Arrdc4	4.54629255657304e-20	-2.12548	0.008	0.056	7.52411418112838e-16	0.icl2	Arrdc4
Agpat2	4.60694642063249e-20	-1.57785	0.022	0.08	7.62449632614677e-16	0.icl2	Agpat2
Soga1	4.94054666932717e-20	-5.7938	0	0.04	8.17660473773646e-16	0.icl2	Soga1
Nos1ap	4.99617787528565e-20	-3.0001	0.007	0.052	8.26867438359776e-16	0.icl2	Nos1ap
Ssh1	5.10410475703546e-20	-1.23768	0.055	0.131	8.44729337289369e-16	0.icl2	Ssh1
Xrn2	5.1688520474922e-20	0.354678	0.647	0.602	8.55445013859959e-16	0.icl2	Xrn2
Fnbp1l	5.25962937132123e-20	-2.80099	0.015	0.068	8.70468660953664e-16	0.icl2	Fnbp1l
Rasgrp4	5.37142920347758e-20	-2.09385	0.031	0.094	8.8897153317554e-16	0.icl2	Rasgrp4
Sla2	5.87299782195474e-20	1.03369	0.268	0.19	9.7198113953351e-16	0.icl2	Sla2
Sorl1	5.88471845073e-20	-1.07649	0.287	0.42	9.73920903595814e-16	0.icl2	Sorl1
Pilrb2	6.09588390739919e-20	-6.55212	0	0.039	1.00886878667457e-15	0.icl2	Pilrb2
Cep85l	6.2273019809828e-20	-1.39325	0.046	0.117	1.03061847785265e-15	0.icl2	Cep85l
Sos2	6.29000408228512e-20	-0.602153	0.147	0.26	1.04099567561819e-15	0.icl2	Sos2
Zfp521	6.45533859166301e-20	-3.60646	0.003	0.046	1.06835853692023e-15	0.icl2	Zfp521
Fam204a	6.48092577931467e-20	-0.585516	0.184	0.304	1.07259321647658e-15	0.icl2	Fam204a
Pde4d	6.68031190161615e-20	0.450031	0.328	0.239	1.10559161971747e-15	0.icl2	Pde4d
Hexa	7.31507313994457e-20	-0.766396	0.122	0.226	1.21064460466083e-15	0.icl2	Hexa
Lxn	7.44802582496691e-20	-1.96836	0.01	0.06	1.23264827403202e-15	0.icl2	Lxn
Snn	7.69565190032655e-20	-3.0039	0.008	0.055	1.27363038950404e-15	0.icl2	Snn
Megf9	7.81602378322067e-20	-1.53984	0.025	0.085	1.29355193612302e-15	0.icl2	Megf9
Sdc3	7.8699604489996e-20	-3.41373	0.006	0.05	1.30247845430943e-15	0.icl2	Sdc3
Fkbp5	8.22111170327706e-20	0.917438	0.331	0.257	1.36059398689235e-15	0.icl2	Fkbp5
Rps6ka5	8.39749747203247e-20	-0.747905	0.174	0.288	1.38978583162137e-15	0.icl2	Rps6ka5
Cd36	8.4242555223327e-20	-4.82885	0.002	0.042	1.39421428894606e-15	0.icl2	Cd36
Nrg1	9.20648103374609e-20	-6.41457	0.008	0.054	1.52367261108498e-15	0.icl2	Nrg1
Tsc22d1	9.29712395108105e-20	-1.0977	0.108	0.201	1.53867401390391e-15	0.icl2	Tsc22d1
Gusb	9.69713499074463e-20	-1.11994	0.081	0.167	1.60487584096824e-15	0.icl2	Gusb
Cers4	9.71010600017266e-20	-0.723858	0.091	0.182	1.60702254302858e-15	0.icl2	Cers4
Frmd4b	9.99324515570043e-20	-1.5249	0.053	0.126	1.65388207326842e-15	0.icl2	Frmd4b
Slc14a1	1.01202600733514e-19	0.654535	0.267	0.183	1.67490304213966e-15	0.icl2	Slc14a1
Dynll2	1.03513090852332e-19	-0.757743	0.099	0.193	1.7131416536061e-15	0.icl2	Dynll2
Arhgef40	1.04520029146741e-19	-3.57249	0.002	0.043	1.72980648237857e-15	0.icl2	Arhgef40
Ddx60	1.04564037067886e-19	1.01298	0.192	0.118	1.73053481347351e-15	0.icl2	Ddx60
Txndc17	1.07279776661679e-19	-0.62501	0.305	0.454	1.77548030375078e-15	0.icl2	Txndc17
Scamp2	1.0747472914132e-19	-0.630371	0.137	0.246	1.77870676728885e-15	0.icl2	Scamp2
Klra3	1.14482369535461e-19	-5.34159	0.004	0.046	1.89468321581188e-15	0.icl2	Klra3
Rpl4	1.21081676716188e-19	0.227425	0.95	0.858	2.00390174965291e-15	0.icl2	Rpl4
Upb1	1.26925518808827e-19	-3.34427	0.005	0.048	2.10061733628608e-15	0.icl2	Upb1
Sh3gl1	1.28761940139705e-19	0.812022	0.341	0.269	2.13101010931212e-15	0.icl2	Sh3gl1
Nek7	1.29909727331977e-19	-0.559704	0.284	0.422	2.15000598734423e-15	0.icl2	Nek7
Cebpa	1.32476293198255e-19	-5.45024	0.001	0.04	2.19248265243112e-15	0.icl2	Cebpa
Cyth1	1.35805174806671e-19	0.300942	0.585	0.533	2.24757564305041e-15	0.icl2	Cyth1
Tbcb	1.38207863623179e-19	-0.453336	0.227	0.364	2.28734014296362e-15	0.icl2	Tbcb
Disc1	1.4610172639751e-19	-1.31128	0.049	0.121	2.41798357187879e-15	0.icl2	Disc1
Prkcb	1.49718405300814e-19	0.222427	0.647	0.544	2.47783960772848e-15	0.icl2	Prkcb
Zfp1	1.58864378343287e-19	1.03733	0.201	0.128	2.6292054615814e-15	0.icl2	Zfp1
Zfp703	1.59644731276576e-19	-1.84074	0.015	0.067	2.64212030262733e-15	0.icl2	Zfp703
Eif3h	1.59903455484617e-19	0.29579	0.805	0.746	2.6464021882704e-15	0.icl2	Eif3h
Psmb10	1.65869868134964e-19	0.530373	0.557	0.517	2.74514631763365e-15	0.icl2	Psmb10
Rasgrp3	1.66703213422856e-19	-5.31197	0.001	0.041	2.75893818214826e-15	0.icl2	Rasgrp3
Lman1	1.67267278609704e-19	-0.724108	0.071	0.156	2.76827346099061e-15	0.icl2	Lman1
Pnp	1.67817801391591e-19	-0.745873	0.113	0.212	2.77738461303083e-15	0.icl2	Pnp
Scn1b	1.68604503945816e-19	-4.37268	0.002	0.042	2.79040454030325e-15	0.icl2	Scn1b
Lrig1	1.73054805042637e-19	0.98491	0.115	0.055	2.86405702345564e-15	0.icl2	Lrig1
Vcam1	1.88780519776224e-19	-8.7888	0	0.037	3.12431760229651e-15	0.icl2	Vcam1
Tomm20	1.96864171242753e-19	0.3505	0.674	0.629	3.25810203406756e-15	0.icl2	Tomm20
Il1rl1	2.01598078667782e-19	-6.37186	0.001	0.039	3.3364482019518e-15	0.icl2	Il1rl1
Mafg	2.02056594468194e-19	-1.32492	0.04	0.108	3.34403663844861e-15	0.icl2	Mafg
Cd302	2.06144165125074e-19	-3.49079	0.005	0.047	3.41168593281998e-15	0.icl2	Cd302
Prkx	2.08297830913683e-19	-0.538099	0.136	0.243	3.44732910162146e-15	0.icl2	Prkx
Casp8	2.14194638779772e-19	0.686602	0.392	0.328	3.54492127180523e-15	0.icl2	Casp8
Plekho1	2.17808108423854e-19	-1.40872	0.081	0.163	3.60472419441478e-15	0.icl2	Plekho1
Nlrp1b	2.26880125990787e-19	-3.39877	0.012	0.061	3.75486608514752e-15	0.icl2	Nlrp1b
Slfn2	2.49547140853508e-19	0.334395	0.605	0.539	4.13000518112556e-15	0.icl2	Slfn2
Cblb	2.56959869365116e-19	0.151495	0.666	0.579	4.25268583799267e-15	0.icl2	Cblb
Pcyt1a	2.74670326975112e-19	-0.885847	0.1	0.192	4.54579391143811e-15	0.icl2	Pcyt1a
Atg7	3.14506569054805e-19	-0.767951	0.129	0.23	5.20508371785702e-15	0.icl2	Atg7
Cacna1d	3.37285655489898e-19	-2.7367	0.008	0.054	5.5820775983578e-15	0.icl2	Cacna1d
Ror1	3.42832651290378e-19	-4.05712	0.001	0.039	5.67388037885576e-15	0.icl2	Ror1
Gng12	3.45262934935267e-19	-0.815457	0.128	0.227	5.71410157317867e-15	0.icl2	Gng12
Pak2	3.4556938864845e-19	0.346859	0.698	0.672	5.71917338213184e-15	0.icl2	Pak2
Sh2b3	3.48837541259724e-19	-1.04006	0.065	0.145	5.77326130784843e-15	0.icl2	Sh2b3
Lima1	3.58859038393955e-19	-3.62108	0.004	0.046	5.93911708541995e-15	0.icl2	Lima1
Papss2	3.64740681416184e-19	-3.17097	0.006	0.05	6.03645827743785e-15	0.icl2	Papss2
Cux1	3.66767893405777e-19	0.403998	0.523	0.464	6.07000863586562e-15	0.icl2	Cux1
Ube2d2a	3.69751419401251e-19	0.401913	0.56	0.527	6.11938599109071e-15	0.icl2	Ube2d2a
Synj2	3.87603367196108e-19	-1.46771	0.021	0.076	6.41483572709558e-15	0.icl2	Synj2
Tep1	4.14122225424255e-19	-1.21411	0.053	0.126	6.85372283077142e-15	0.icl2	Tep1
Synpo2	4.39869475798714e-19	-5.22798	0.004	0.046	7.27983982446872e-15	0.icl2	Synpo2
Rab20	4.56305529206336e-19	-2.25186	0.013	0.062	7.55185650836486e-15	0.icl2	Rab20
Ctnnd2	4.59744109775711e-19	-3.3194	0.005	0.048	7.60876501678803e-15	0.icl2	Ctnnd2
Macf1	4.69889456756302e-19	0.199293	0.826	0.751	7.77667050931679e-15	0.icl2	Macf1
Bcl9l	4.87320151906725e-19	0.93947	0.234	0.16	8.0651485140563e-15	0.icl2	Bcl9l
Pdia3	5.03027416485857e-19	-0.500495	0.493	0.615	8.32510374284094e-15	0.icl2	Pdia3
Ero1b	5.41788230135683e-19	-0.952504	0.162	0.267	8.96659520874555e-15	0.icl2	Ero1b
Tnfaip8l1	5.50257165727875e-19	1.72647	0.098	0.045	9.10675609279634e-15	0.icl2	Tnfaip8l1
Lifr	5.62858662653669e-19	-2.90149	0.002	0.042	9.31531086691823e-15	0.icl2	Lifr
Gphn	5.65317086997695e-19	-1.03795	0.804	0.873	9.35599778981186e-15	0.icl2	Gphn
Trpv2	5.65341848286575e-19	-0.736487	0.13	0.231	9.35640758914282e-15	0.icl2	Trpv2
Ptprv	5.69132441590103e-19	-3.17195	0.006	0.049	9.41914190831621e-15	0.icl2	Ptprv
Lamp1	5.76023867902723e-19	-0.831744	0.3	0.429	9.53319501379006e-15	0.icl2	Lamp1
Otulinl	5.82301003654049e-19	0.336323	0.521	0.442	9.63708161047451e-15	0.icl2	Otulinl
Ubald2	5.88291400922015e-19	-0.752397	0.288	0.416	9.73622268525934e-15	0.icl2	Ubald2
Cnpy3	6.20965895675759e-19	-0.645632	0.117	0.217	1.02769855734338e-14	0.icl2	Cnpy3
Nrarp	6.40403972487254e-19	-2.70325	0.008	0.053	1.05986857446641e-14	0.icl2	Nrarp
Actr10	6.63042153347049e-19	0.763311	0.388	0.337	1.09733476378937e-14	0.icl2	Actr10
Ndnf	6.73082804520381e-19	-2.48062	0.015	0.065	1.11395204148123e-14	0.icl2	Ndnf
Npnt	6.82796088257731e-19	-5.3843	0.001	0.038	1.13002752606654e-14	0.icl2	Npnt
Treml4	6.98729775439237e-19	-5.09956	0.001	0.038	1.15639777835194e-14	0.icl2	Treml4
Cd200	7.34117261562969e-19	-2.02894	0.037	0.099	1.21496406788671e-14	0.icl2	Cd200
Eeig1	7.60339393437007e-19	0.726607	0.347	0.274	1.25836169613825e-14	0.icl2	Eeig1
Rptor	7.62221527549278e-19	-0.598506	0.223	0.346	1.26147662809405e-14	0.icl2	Rptor
St3gal5	7.83376868348976e-19	-2.9552	0.014	0.064	1.29648871711755e-14	0.icl2	St3gal5
Pip5k1c	7.95834101189794e-19	-0.943284	0.096	0.185	1.31710543746911e-14	0.icl2	Pip5k1c
Itpripl2	7.97920419809909e-19	-2.43697	0.007	0.05	1.3205582947854e-14	0.icl2	Itpripl2
Ston2	8.04697233850346e-19	-2.47479	0.02	0.074	1.33177392202232e-14	0.icl2	Ston2
Slfn4	8.17088801130272e-19	-6.33062	0.002	0.04	1.3522819658706e-14	0.icl2	Slfn4
Mapk10	8.3599829639294e-19	-6.21209	0.001	0.039	1.38357718053032e-14	0.icl2	Mapk10
Mast4	8.61848397484891e-19	-1.00414	0.103	0.193	1.4263590978375e-14	0.icl2	Mast4
Khk	8.6938872921245e-19	-1.44033	0.046	0.113	1.43883834684661e-14	0.icl2	Khk
Pon2	9.59766776023374e-19	-0.529852	0.145	0.254	1.58841401431868e-14	0.icl2	Pon2
Ubb	9.60422722280273e-19	0.21765	0.99	0.93	1.58949960537385e-14	0.icl2	Ubb
Fubp1	9.68136218220533e-19	0.492193	0.514	0.47	1.60226544115498e-14	0.icl2	Fubp1
B9d2	9.78178649571023e-19	-0.870198	0.068	0.148	1.61888566504004e-14	0.icl2	B9d2
Mef2a	1.00020720875229e-18	-0.596644	0.371	0.503	1.65534293048504e-14	0.icl2	Mef2a
Ier3	1.01311756868138e-18	-2.60358	0.027	0.084	1.67670957616768e-14	0.icl2	Ier3
Nfe2l2	1.04873496097479e-18	-0.905269	0.285	0.408	1.73565636041327e-14	0.icl2	Nfe2l2
Ptpn18	1.06271296595341e-18	0.232295	0.903	0.811	1.75878995865289e-14	0.icl2	Ptpn18
Hlx	1.09209040860462e-18	-4.82375	0	0.037	1.80740962624065e-14	0.icl2	Hlx
Eloa	1.10384539806434e-18	-0.809396	0.109	0.204	1.82686413379649e-14	0.icl2	Eloa
Wdfy1	1.10713954132341e-18	-0.80355	0.078	0.162	1.83231594089025e-14	0.icl2	Wdfy1
Chst3	1.13917411484486e-18	-5.06505	0.001	0.038	1.88533316006825e-14	0.icl2	Chst3
Fam43a	1.21182712345117e-18	-2.08558	0.007	0.05	2.00557388931168e-14	0.icl2	Fam43a
Arhgap18	1.37885977475369e-18	-0.596322	0.19	0.306	2.28201292721736e-14	0.icl2	Arhgap18
Gimap7	1.38603979574292e-18	0.807738	0.223	0.145	2.29389586195453e-14	0.icl2	Gimap7
Kif21b	1.45535855483066e-18	0.590651	0.341	0.268	2.40861840824474e-14	0.icl2	Kif21b
Hdac5	1.49043304220569e-18	-1.17497	0.045	0.113	2.46666668485041e-14	0.icl2	Hdac5
Eps15	1.66138123704097e-18	-0.645347	0.227	0.353	2.74958594730281e-14	0.icl2	Eps15
Paqr5	1.80678032792056e-18	-4.01178	0.002	0.041	2.99022144270853e-14	0.icl2	Paqr5
Raph1	1.83493320874177e-18	-1.00581	0.044	0.111	3.03681446046764e-14	0.icl2	Raph1
Kcnk5	1.84229764612565e-18	-1.61289	0.018	0.071	3.04900260433794e-14	0.icl2	Kcnk5
Cd200r1	1.92468990313667e-18	-2.05913	0.015	0.065	3.18536178969118e-14	0.icl2	Cd200r1
Itgae	1.99320851663645e-18	0.750055	0.225	0.144	3.29876009503332e-14	0.icl2	Itgae
Fem1c	2.03495796751699e-18	-0.818919	0.169	0.276	3.36785543624062e-14	0.icl2	Fem1c
Cryba4	2.39799843142958e-18	-4.13704	0.001	0.038	3.96868740401595e-14	0.icl2	Cryba4
Tmem159	2.41015995530997e-18	-2.44799	0.006	0.047	3.988814726038e-14	0.icl2	Tmem159
Ifit1bl1	2.49720172863275e-18	1.5774	0.068	0.025	4.13286886088721e-14	0.icl2	Ifit1bl1
Tmcc1	2.53820587059302e-18	-0.927103	0.293	0.412	4.20073071583145e-14	0.icl2	Tmcc1
Daglb	2.547894894319e-18	-1.56176	0.023	0.079	4.21676605009794e-14	0.icl2	Daglb
Pdgfa	2.55906413446081e-18	-7.4555	0	0.035	4.23525114253263e-14	0.icl2	Pdgfa
Calr	2.57971177491432e-18	-0.531818	0.472	0.589	4.2694229874832e-14	0.icl2	Calr
Sh3bp2	2.59050034233569e-18	-2.34925	0.013	0.06	4.28727806656557e-14	0.icl2	Sh3bp2
Acss1	2.60813434689913e-18	1.01402	0.185	0.116	4.31646234411806e-14	0.icl2	Acss1
Anpep	2.72635213347831e-18	-6.73891	0	0.036	4.51211278090661e-14	0.icl2	Anpep
Klra1	2.74343172104749e-18	-6.33941	0.001	0.037	4.54037949833359e-14	0.icl2	Klra1
Dntt	2.90267707061077e-18	2.07281	0.082	0.034	4.80393055186082e-14	0.icl2	Dntt
Sirpb1a	3.24241050150478e-18	-7.71756	0	0.035	5.36618937999042e-14	0.icl2	Sirpb1a
1700113H08Rik	3.24241050150478e-18	-8.70943	0	0.035	5.36618937999042e-14	0.icl2	1700113H08Rik
S1pr5	3.24241050150478e-18	-7.63203	0	0.035	5.36618937999042e-14	0.icl2	S1pr5
Cwc25	3.32669025979381e-18	-1.08256	0.112	0.203	5.50567237995875e-14	0.icl2	Cwc25
Hcls1	3.39595062577509e-18	-0.524237	0.287	0.426	5.62029828565778e-14	0.icl2	Hcls1
Eid1	3.53546419502581e-18	-0.50891	0.231	0.357	5.85119324276771e-14	0.icl2	Eid1
Muc1	3.68793503080099e-18	-3.55926	0.003	0.041	6.10353247597563e-14	0.icl2	Muc1
Gpc1	3.81420621786458e-18	-3.68682	0.004	0.043	6.31251129056587e-14	0.icl2	Gpc1
Hepacam2	4.40752298158137e-18	-6.43163	0	0.036	7.29445053451717e-14	0.icl2	Hepacam2
Tm6sf1	4.9421631318252e-18	-0.71331	0.191	0.302	8.17927998317071e-14	0.icl2	Tm6sf1
Ogt	5.04938586967418e-18	0.389273	0.585	0.541	8.35673361431077e-14	0.icl2	Ogt
B3galt1	5.562453375812e-18	-7.3433	0.001	0.036	9.20586033696886e-14	0.icl2	B3galt1
Ddr1	5.72025758471572e-18	-3.85435	0.003	0.041	9.46702630270452e-14	0.icl2	Ddr1
Stk32c	5.74957427807964e-18	-3.82332	0.003	0.041	9.51554543022181e-14	0.icl2	Stk32c
Atp8b4	5.85614818946709e-18	0.353168	0.58	0.495	9.69192525356803e-14	0.icl2	Atp8b4
Rbm38	5.90399256520566e-18	0.765273	0.263	0.191	9.77110769541536e-14	0.icl2	Rbm38
Cd14	6.5932222234307e-18	-8.19019	0	0.034	1.09117827797778e-13	0.icl2	Cd14
Klk1	7.08881480732033e-18	-6.89192	0.001	0.036	1.17319885061151e-13	0.icl2	Klk1
Ttc39a	7.33622542106606e-18	-5.8058	0.001	0.036	1.21414530718643e-13	0.icl2	Ttc39a
Rab27b	7.63201589095844e-18	-3.55116	0.004	0.042	1.26309862995362e-13	0.icl2	Rab27b
Glrx	7.74440559690474e-18	-1.05646	0.058	0.13	1.28169912628774e-13	0.icl2	Glrx
Dennd5b	7.7764329739253e-18	-3.80634	0.004	0.042	1.28699965718464e-13	0.icl2	Dennd5b
Cmip	8.30436422756545e-18	-0.746687	0.504	0.618	1.37437227966208e-13	0.icl2	Cmip
Gfra1	8.40877571137586e-18	3.31791	0.03	0.005	1.3916523802327e-13	0.icl2	Gfra1
Ppm1m	8.93070008404397e-18	-0.957473	0.063	0.138	1.47803086390928e-13	0.icl2	Ppm1m
Htr7	9.06757436979508e-18	-6.68067	0.001	0.036	1.50068355820109e-13	0.icl2	Htr7
Eprs	9.17098939223753e-18	-0.957968	0.261	0.385	1.51779874441531e-13	0.icl2	Eprs
Acvr1	9.37042152835536e-18	-2.57918	0.007	0.048	1.55080476294281e-13	0.icl2	Acvr1
Smagp	9.62858861979747e-18	-4.22943	0.002	0.038	1.59353141657648e-13	0.icl2	Smagp
Bcat2	9.7598825516703e-18	-1.11147	0.059	0.131	1.61526056230143e-13	0.icl2	Bcat2
Mboat1	1.01016692193086e-17	1.15214	0.157	0.092	1.67182625579557e-13	0.icl2	Mboat1
Zfp260	1.04150553946768e-17	1.1424	0.18	0.113	1.72369166781902e-13	0.icl2	Zfp260
Tns4	1.05797697689836e-17	-6.96067	0	0.034	1.75095189676678e-13	0.icl2	Tns4
Pi16	1.05797698736119e-17	-7.64052	0	0.034	1.75095191408276e-13	0.icl2	Pi16
Pdia6	1.06534781001711e-17	-0.59778	0.273	0.398	1.76315062557832e-13	0.icl2	Pdia6
Iffo2	1.06966534616436e-17	-0.916075	0.062	0.136	1.77029614790202e-13	0.icl2	Iffo2
Idh2	1.06977311377001e-17	1.10574	0.193	0.126	1.77047450328937e-13	0.icl2	Idh2
Ass1	1.10249264188564e-17	-0.921011	0.084	0.167	1.82462532232073e-13	0.icl2	Ass1
Gabarap	1.10710978431785e-17	-0.479637	0.59	0.696	1.83226669304605e-13	0.icl2	Gabarap
Dennd2b	1.13086008564279e-17	-4.91199	0.002	0.038	1.87157344173882e-13	0.icl2	Dennd2b
Itga1	1.16758350107578e-17	-5.21769	0.001	0.036	1.93235069428042e-13	0.icl2	Itga1
Ube2l6	1.2110440856655e-17	-2.35685	0.008	0.051	2.00427796177641e-13	0.icl2	Ube2l6
Map7d1	1.21970220236989e-17	-0.901326	0.099	0.187	2.01860714492217e-13	0.icl2	Map7d1
Dnm2	1.23441662688099e-17	0.454711	0.481	0.433	2.04295951748805e-13	0.icl2	Dnm2
Sh3bgrl	1.2644827277675e-17	-0.583319	0.205	0.323	2.09271891445521e-13	0.icl2	Sh3bgrl
Arntl	1.2766950273569e-17	-0.628849	0.112	0.204	2.11293027027568e-13	0.icl2	Arntl
Hk3	1.30719368116922e-17	-3.18541	0.006	0.046	2.16340554233507e-13	0.icl2	Hk3
Gbp8	1.35484168534092e-17	0.6055	0.353	0.282	2.24226298923922e-13	0.icl2	Gbp8
H1f0	1.4420438314005e-17	-1.21131	0.033	0.093	2.38658254096783e-13	0.icl2	H1f0
Cd209d	1.46426959012037e-17	-6.14487	0.001	0.036	2.42336617164921e-13	0.icl2	Cd209d
Gpr35	1.52535970383021e-17	-3.74619	0.003	0.04	2.524470309839e-13	0.icl2	Gpr35
Zfp280d	1.5333243176143e-17	0.62953	0.388	0.328	2.53765174565166e-13	0.icl2	Zfp280d
Cpe	1.53379047292363e-17	-4.65716	0.001	0.036	2.53842323268861e-13	0.icl2	Cpe
Espn	1.5566501371639e-17	-1.37434	0.014	0.061	2.57625597700626e-13	0.icl2	Espn
Smyd3	1.59038627921778e-17	0.401234	0.598	0.535	2.63208929210543e-13	0.icl2	Smyd3
Nelfe	1.70003290067936e-17	-0.834205	0.055	0.126	2.81355445062434e-13	0.icl2	Nelfe
Anxa6	1.71318760895974e-17	0.424006	0.549	0.489	2.83532549282837e-13	0.icl2	Anxa6
Nhsl2	1.77525695529588e-17	-2.94504	0.005	0.043	2.93805026101468e-13	0.icl2	Nhsl2
Cx3cl1	1.79233159400221e-17	-6.383	0	0.034	2.96630878807366e-13	0.icl2	Cx3cl1
Diaph1	1.80111809636463e-17	-0.469236	0.455	0.59	2.98085044948346e-13	0.icl2	Diaph1
Bmpr2	1.85392246996616e-17	-0.933448	0.064	0.138	3.068241687794e-13	0.icl2	Bmpr2
Setd4	1.90104478810446e-17	1.1999	0.16	0.097	3.14622912431288e-13	0.icl2	Setd4
Fhad1	1.93811817052672e-17	-4.40102	0.002	0.038	3.20758557222172e-13	0.icl2	Fhad1
Tent5a	2.10602927786607e-17	0.753063	0.297	0.22	3.48547845486834e-13	0.icl2	Tent5a
Cebpzos	2.16192003359818e-17	-0.532417	0.084	0.167	3.57797765560499e-13	0.icl2	Cebpzos
2900026A02Rik	2.23206809450579e-17	-2.15161	0.01	0.053	3.69407269640709e-13	0.icl2	2900026A02Rik
Itgav	2.278969455085e-17	-0.879309	0.191	0.295	3.77169444816568e-13	0.icl2	Itgav
Nxpe4	2.32235330046847e-17	-4.16622	0.002	0.038	3.84349471227532e-13	0.icl2	Nxpe4
Akr1e1	2.39388168964736e-17	-1.65924	0.018	0.068	3.96187419636637e-13	0.icl2	Akr1e1
Sod1	2.54331822622909e-17	-0.602822	0.214	0.334	4.20919166440915e-13	0.icl2	Sod1
A530032D15Rik	2.55340975435509e-17	-4.38329	0.001	0.036	4.22589314345768e-13	0.icl2	A530032D15Rik
Ccm2	2.56561117421757e-17	0.507087	0.495	0.445	4.24608649333008e-13	0.icl2	Ccm2
Cxcr3	2.58151935573975e-17	-0.664639	0.076	0.154	4.27241453374928e-13	0.icl2	Cxcr3
Arap1	2.65520999662244e-17	-1.04889	0.077	0.156	4.39437254441015e-13	0.icl2	Arap1
Uap1l1	2.6955781823714e-17	-1.23906	0.027	0.083	4.46118189182467e-13	0.icl2	Uap1l1
Tlcd2	2.78175538980378e-17	-1.508	0.032	0.09	4.60380517012525e-13	0.icl2	Tlcd2
Rnf144a	2.91566254025753e-17	0.831118	0.247	0.174	4.82542150412621e-13	0.icl2	Rnf144a
Sema4a	3.07880867693891e-17	-0.737919	0.183	0.292	5.09542836033389e-13	0.icl2	Sema4a
Gm6377	3.16320297631174e-17	-4.75713	0.001	0.036	5.23510092579593e-13	0.icl2	Gm6377
Jup	3.21367871313319e-17	-3.13197	0.005	0.044	5.31863827023542e-13	0.icl2	Jup
ENSMUSG00000079800	3.27190337423251e-17	-2.6309	0.006	0.046	5.41500008435481e-13	0.icl2	ENSMUSG00000079800
Kctd14	3.34183862348923e-17	-3.45211	0.002	0.037	5.53074292187467e-13	0.icl2	Kctd14
Ly6c2	3.42317214674591e-17	-0.862557	0.196	0.282	5.66534990286449e-13	0.icl2	Ly6c2
Ube2z	3.47959345375816e-17	-0.867951	0.074	0.151	5.75872716596976e-13	0.icl2	Ube2z
Optn	3.48434488177455e-17	-2.90037	0.007	0.047	5.76659077933688e-13	0.icl2	Optn
Susd3	3.54247789421804e-17	-1.14841	0.033	0.092	5.86280091493086e-13	0.icl2	Susd3
Fkbp2	3.70089691568101e-17	-0.542013	0.176	0.287	6.12498439545207e-13	0.icl2	Fkbp2
Tmem38b	3.70746456106869e-17	-1.53094	0.023	0.075	6.13585384856868e-13	0.icl2	Tmem38b
Stmp1	3.86123633274536e-17	-0.539291	0.362	0.492	6.39034613069357e-13	0.icl2	Stmp1
Mefv	4.36619089567374e-17	-7.9696	0	0.032	7.22604593234003e-13	0.icl2	Mefv
Psmb3	4.38957874009033e-17	0.351453	0.645	0.622	7.2647528148495e-13	0.icl2	Psmb3
Smim10l1	4.48379039250672e-17	-0.540695	0.109	0.201	7.42067309959862e-13	0.icl2	Smim10l1
Cnp	4.55507226744779e-17	0.711508	0.358	0.296	7.5386446026261e-13	0.icl2	Cnp
Rufy1	4.73873971282951e-17	-0.844183	0.07	0.147	7.84261422473285e-13	0.icl2	Rufy1
Dlg5	4.78428369063428e-17	-5.1954	0	0.033	7.91798950799973e-13	0.icl2	Dlg5
Sh3tc1	4.81838197133499e-17	-2.88468	0.007	0.046	7.97442216255941e-13	0.icl2	Sh3tc1
Rbl2	5.08967465856418e-17	-0.562363	0.211	0.325	8.42341155992371e-13	0.icl2	Rbl2
Ctsw	5.21412656966918e-17	0.158271	0.567	0.441	8.6293794728025e-13	0.icl2	Ctsw
Magi1	5.38978602184137e-17	-5.2372	0.003	0.038	8.92009586614747e-13	0.icl2	Magi1
Atg4c	5.89802055224258e-17	-2.62901	0.009	0.051	9.76122401396147e-13	0.icl2	Atg4c
P3h2	5.9000885271724e-17	-6.78333	0	0.033	9.76464651247032e-13	0.icl2	P3h2
Vps18	6.01941912071815e-17	-1.31305	0.038	0.099	9.96213864478854e-13	0.icl2	Vps18
Ddx5	6.14739807307096e-17	-0.246254	0.962	0.94	1.01739438109324e-12	0.icl2	Ddx5
Atp5j2	6.16626654441239e-17	0.275736	0.779	0.735	1.02051711310025e-12	0.icl2	Atp5j2
Adap2	6.2200188620162e-17	-5.68321	0.001	0.034	1.02941312166368e-12	0.icl2	Adap2
Plxdc1	6.23118765007507e-17	-1.29934	0.028	0.083	1.03126155608742e-12	0.icl2	Plxdc1
3830406C13Rik	6.27032691540707e-17	-0.692636	0.088	0.171	1.03773910449987e-12	0.icl2	3830406C13Rik
Sh2d1a	6.41806083014666e-17	0.576249	0.306	0.22	1.06218906738927e-12	0.icl2	Sh2d1a
Dab2ip	6.44163405462334e-17	-3.52532	0.002	0.037	1.06609043604016e-12	0.icl2	Dab2ip
Ralgds	6.48558404748908e-17	-1.61474	0.021	0.072	1.07336415985944e-12	0.icl2	Ralgds
Zc2hc1a	6.53177346085079e-17	-2.37466	0.01	0.053	1.08100850777081e-12	0.icl2	Zc2hc1a
Zbtb38	6.88921659725408e-17	-0.692735	0.122	0.214	1.14016534684555e-12	0.icl2	Zbtb38
Uba52	7.30585176086664e-17	0.276157	0.803	0.747	1.20911846642343e-12	0.icl2	Uba52
Aopep	7.62414525365248e-17	0.571368	0.412	0.349	1.26179603947949e-12	0.icl2	Aopep
Podnl1	7.6289647413115e-17	-1.31973	0.032	0.089	1.26259366468705e-12	0.icl2	Podnl1
Dhrs9	7.85699209217911e-17	-3.78356	0.005	0.042	1.30033219125564e-12	0.icl2	Dhrs9
Cds1	8.372788002013e-17	-3.7905	0.002	0.036	1.38569641433315e-12	0.icl2	Cds1
5730522E02Rik	9.41120278353893e-17	-2.77862	0.006	0.045	1.55755406067569e-12	0.icl2	5730522E02Rik
Lipo3	9.7957033821495e-17	-1.82367	0.013	0.057	1.62118890974574e-12	0.icl2	Lipo3
Hdgfl3	9.86267932070545e-17	1.22752	0.138	0.079	1.63227342757675e-12	0.icl2	Hdgfl3
Cdk2ap1	1.02678367543971e-16	-0.63867	0.092	0.176	1.69932698285272e-12	0.icl2	Cdk2ap1
Clu	1.04995607571628e-16	-5.56634	0.003	0.038	1.73767730531044e-12	0.icl2	Clu
Ecpas	1.09212667141433e-16	-0.548032	0.22	0.34	1.80746964119072e-12	0.icl2	Ecpas
Dhrs7	1.10275903908423e-16	-0.627047	0.121	0.215	1.82506620968441e-12	0.icl2	Dhrs7
Phactr3	1.12228999572513e-16	-7.85047	0	0.032	1.8573899429251e-12	0.icl2	Phactr3
Golm2	1.15722292434916e-16	1.37925	0.123	0.067	1.91520393979786e-12	0.icl2	Golm2
Egfr	1.20542047886162e-16	-5.77065	0	0.033	1.99497089251599e-12	0.icl2	Egfr
Cmtm6	1.23183087849206e-16	-0.575699	0.163	0.269	2.03868010390435e-12	0.icl2	Cmtm6
Fnbp1	1.24717784218516e-16	-0.581298	0.622	0.711	2.06407932881644e-12	0.icl2	Fnbp1
Hmgb1	1.29958815654634e-16	0.221925	0.873	0.794	2.1508183990842e-12	0.icl2	Hmgb1
Med11	1.34355947705523e-16	-0.634769	0.112	0.202	2.22359093452641e-12	0.icl2	Med11
Stard9	1.36191415881544e-16	-3.39405	0.006	0.043	2.25396793283956e-12	0.icl2	Stard9
Got1	1.37564315089603e-16	-0.926031	0.107	0.193	2.27668941473293e-12	0.icl2	Got1
Tyk2	1.41792371117897e-16	-0.902547	0.114	0.203	2.34666374200119e-12	0.icl2	Tyk2
Zhx2	1.47706996331809e-16	-0.853789	0.229	0.333	2.44455078929144e-12	0.icl2	Zhx2
Dennd3	1.48875078005597e-16	-1.35273	0.049	0.112	2.46388254099263e-12	0.icl2	Dennd3
Ap3s1	1.48965957285454e-16	-0.457885	0.248	0.368	2.46538659307427e-12	0.icl2	Ap3s1
Dnase1l1	1.49558379026529e-16	-1.14405	0.026	0.079	2.47519117288906e-12	0.icl2	Dnase1l1
St6galnac6	1.50427562725811e-16	-2.64148	0.006	0.043	2.48957616311218e-12	0.icl2	St6galnac6
Scarb1	1.61060092972429e-16	-1.97882	0.02	0.068	2.6655445386937e-12	0.icl2	Scarb1
Ldlrap1	1.69369496322258e-16	1.04058	0.192	0.127	2.80306516413337e-12	0.icl2	Ldlrap1
Gbp4	1.73901166207619e-16	0.805829	0.28	0.212	2.8780643007361e-12	0.icl2	Gbp4
Sh3bgrl2	1.74379423398975e-16	-2.06198	0.006	0.044	2.88597945725304e-12	0.icl2	Sh3bgrl2
Ms4a4c	1.79581834315474e-16	-0.85443	0.12	0.204	2.97207935792109e-12	0.icl2	Ms4a4c
Ndufa13	1.89715292685829e-16	0.266156	0.805	0.746	3.13978809395046e-12	0.icl2	Ndufa13
Sh2d4a	1.91771902550581e-16	-6.76423	0	0.032	3.17382498721212e-12	0.icl2	Sh2d4a
Cdc42ep2	2.02233027051932e-16	-5.25723	0.001	0.033	3.34695659770948e-12	0.icl2	Cdc42ep2
Cltc	2.07517983966356e-16	-0.597024	0.297	0.424	3.43442263464318e-12	0.icl2	Cltc
Mat2a	2.12354099133742e-16	0.334282	0.638	0.581	3.51446034066343e-12	0.icl2	Mat2a
Arhgap32	2.23273914197501e-16	-3.51182	0.003	0.038	3.69518327996864e-12	0.icl2	Arhgap32
Smap2	2.30449721173973e-16	-0.498673	0.35	0.481	3.81394288542926e-12	0.icl2	Smap2
Siah2	2.31031735617942e-16	-0.443403	0.12	0.214	3.82357522447694e-12	0.icl2	Siah2
Mlf1	2.34146731464069e-16	-3.0399	0.005	0.041	3.87512840573034e-12	0.icl2	Mlf1
Srrd	2.36334198978847e-16	-1.30956	0.036	0.093	3.91133099309991e-12	0.icl2	Srrd
Exoc6	2.40568884466811e-16	-0.657862	0.167	0.268	3.98141503792572e-12	0.icl2	Exoc6
Thbs1	2.43383920707265e-16	-6.6824	0.001	0.034	4.02800388770524e-12	0.icl2	Thbs1
Mrpl30	2.47713261669322e-16	0.55098	0.485	0.448	4.09965448062727e-12	0.icl2	Mrpl30
Rapgef5	2.60538325303343e-16	-4.10681	0.002	0.035	4.31190928377032e-12	0.icl2	Rapgef5
Adcy9	2.68889919571751e-16	-2.42389	0.004	0.04	4.45012816891248e-12	0.icl2	Adcy9
Slc66a2	2.70561540340711e-16	-1.46744	0.035	0.092	4.47779349263877e-12	0.icl2	Slc66a2
Lap3	2.71197078712508e-16	-0.689055	0.046	0.11	4.48831165269201e-12	0.icl2	Lap3
Bptf	2.75348709347734e-16	0.352057	0.557	0.52	4.55702113970499e-12	0.icl2	Bptf
Sypl	2.76192646980412e-16	-0.652949	0.097	0.18	4.57098830752581e-12	0.icl2	Sypl
Klrc3	2.88259844979781e-16	-7.2525	0	0.031	4.77070043441537e-12	0.icl2	Klrc3
Cmtm3	2.89899022320969e-16	-1.92975	0.014	0.058	4.79782881941204e-12	0.icl2	Cmtm3
Tmem50a	3.02289323855875e-16	0.29884	0.641	0.604	5.00288830981474e-12	0.icl2	Tmem50a
Gtf2ird1	3.02679720179132e-16	1.42485	0.079	0.034	5.00934936896464e-12	0.icl2	Gtf2ird1
Creld2	3.05373418645344e-16	-1.07191	0.049	0.114	5.05393007858044e-12	0.icl2	Creld2
Tcf4	3.07973616772359e-16	-1.80691	0.196	0.282	5.09696335758255e-12	0.icl2	Tcf4
Tfe3	3.09971135286274e-16	-1.1988	0.032	0.087	5.13002228898783e-12	0.icl2	Tfe3
Ckap4	3.11873847853731e-16	-4.21257	0.002	0.036	5.16151218197924e-12	0.icl2	Ckap4
Etl4	3.13236245275612e-16	-5.05242	0.002	0.035	5.18405985931138e-12	0.icl2	Etl4
Fnip1	3.18721812744807e-16	-0.638013	0.241	0.358	5.27484600092655e-12	0.icl2	Fnip1
P2ry12	3.23657286593382e-16	-3.40148	0.003	0.037	5.35652809312048e-12	0.icl2	P2ry12
Crispld2	3.2788962508764e-16	-5.03162	0.001	0.033	5.42657329520045e-12	0.icl2	Crispld2
Chka	3.28661628309917e-16	-1.11829	0.306	0.411	5.43934994852912e-12	0.icl2	Chka
Gkap1	3.3064598718977e-16	-2.41175	0.008	0.046	5.47219108799069e-12	0.icl2	Gkap1
Myo6	3.40096835388874e-16	-1.17628	0.037	0.094	5.62860262568586e-12	0.icl2	Myo6
Stk3	3.50417826689988e-16	-0.725333	0.097	0.18	5.79941503171930e-12	0.icl2	Stk3
Actr3	3.55011183872513e-16	0.211163	0.879	0.846	5.87543509309009e-12	0.icl2	Actr3
Cd19	3.85747633241805e-16	-6.19696	0	0.032	6.38412333015188e-12	0.icl2	Cd19
Pold4	3.87405840178092e-16	-0.471189	0.222	0.342	6.41156665494743e-12	0.icl2	Pold4
Procr	3.96703239359115e-16	-5.55194	0	0.032	6.56543861139335e-12	0.icl2	Procr
Tnip2	4.06635739819159e-16	-1.63317	0.029	0.083	6.72982149400709e-12	0.icl2	Tnip2
P2ry14	4.08391827797143e-16	-1.18134	0.045	0.105	6.75888475004272e-12	0.icl2	P2ry14
Psen2	4.73572730834823e-16	-0.628628	0.107	0.191	7.83762869531632e-12	0.icl2	Psen2
Rbx1	4.81372696917917e-16	0.313606	0.662	0.634	7.96671813399153e-12	0.icl2	Rbx1
Rab11a	4.92716277330727e-16	-0.495685	0.199	0.312	8.15445438982352e-12	0.icl2	Rab11a
Prnp	4.96963830472841e-16	-4.24884	0.002	0.036	8.22475139432553e-12	0.icl2	Prnp
Gca	5.08714531071968e-16	-2.29939	0.014	0.058	8.41922548924107e-12	0.icl2	Gca
Fas	5.21324567728473e-16	-1.23977	0.087	0.161	8.62792159590622e-12	0.icl2	Fas
Cdh22	5.28201967942043e-16	-4.75987	0.001	0.032	8.74174256944081e-12	0.icl2	Cdh22
Lsr	5.55950522924148e-16	-3.76233	0.001	0.033	9.20098115439465e-12	0.icl2	Lsr
Mxd4	5.98010163892764e-16	-0.544311	0.157	0.256	9.89706821242525e-12	0.icl2	Mxd4
Idnk	6.02167129123927e-16	0.726229	0.385	0.338	9.965865987001e-12	0.icl2	Idnk
Ly6i	6.46900956871652e-16	-5.23313	0.001	0.033	1.07062108362258e-11	0.icl2	Ly6i
Ctif	6.9688860325689e-16	-1.73048	0.009	0.048	1.15335063839015e-11	0.icl2	Ctif
Rhog	7.25912835614775e-16	-0.520312	0.184	0.293	1.20138574294245e-11	0.icl2	Rhog
Ahsa1	7.37030556439108e-16	0.57554	0.433	0.389	1.21978557090672e-11	0.icl2	Ahsa1
Marveld1	7.46348907093491e-16	-1.52011	0.031	0.085	1.23520744123973e-11	0.icl2	Marveld1
Nsd2	7.52253144648228e-16	-0.852793	0.082	0.158	1.24497895439282e-11	0.icl2	Nsd2
Rnls	7.62694853775453e-16	-2.14	0.014	0.057	1.26225998299837e-11	0.icl2	Rnls
Bdh1	8.08152720020494e-16	1.62501	0.081	0.037	1.33749275163392e-11	0.icl2	Bdh1
Eno3	8.14053371196052e-16	-2.2804	0.025	0.074	1.34725832932947e-11	0.icl2	Eno3
Fbxo30	8.31168131917547e-16	-1.24606	0.038	0.095	1.37558325832354e-11	0.icl2	Fbxo30
Sash1	8.3563063000075e-16	-4.02053	0.004	0.038	1.38296869265124e-11	0.icl2	Sash1
Rev3l	8.52027023025328e-16	0.524775	0.469	0.421	1.41010472310692e-11	0.icl2	Rev3l
Rnf144b	8.54251149626533e-16	-3.58577	0.002	0.035	1.41378565263191e-11	0.icl2	Rnf144b
Bst1	9.07879940099441e-16	-3.5949	0.004	0.039	1.50254130086458e-11	0.icl2	Bst1
Bloc1s2	9.49414173097052e-16	-0.645478	0.24	0.354	1.57128045647562e-11	0.icl2	Bloc1s2
Arhgef3	9.54470530352487e-16	0.325214	0.595	0.534	1.57964872773337e-11	0.icl2	Arhgef3
Ap1s2	9.72541953376733e-16	-0.766414	0.087	0.163	1.60955693283849e-11	0.icl2	Ap1s2
Wsb1	9.73721201341943e-16	-0.512161	0.291	0.419	1.61150858822092e-11	0.icl2	Wsb1
Trpm6	1.01020310906243e-15	-5.62304	0	0.031	1.67188614549832e-11	0.icl2	Trpm6
Golim4	1.01164521794464e-15	-0.661157	0.077	0.152	1.67427283569839e-11	0.icl2	Golim4
Car5b	1.01620364957082e-15	-5.28714	0.001	0.032	1.6818170400397e-11	0.icl2	Car5b
Polg2	1.01711540523141e-15	0.739016	0.347	0.285	1.68332599565798e-11	0.icl2	Polg2
Fcrl5	1.02938459192523e-15	-5.38189	0.001	0.032	1.70363149963626e-11	0.icl2	Fcrl5
Mgll	1.03039753578854e-15	-3.50687	0.003	0.036	1.70530792173004e-11	0.icl2	Mgll
Hebp1	1.05454537755898e-15	-4.26685	0.002	0.035	1.74527259986011e-11	0.icl2	Hebp1
Gpr34	1.06054445487957e-15	-1.36264	0.019	0.066	1.75520107282569e-11	0.icl2	Gpr34
Ggact	1.07960180797065e-15	1.16093	0.151	0.092	1.78674099219142e-11	0.icl2	Ggact
H2az2	1.11831639101962e-15	0.421484	0.523	0.495	1.85081362713746e-11	0.icl2	H2az2
Myl12b	1.12285642159715e-15	0.366376	0.614	0.582	1.85832737774328e-11	0.icl2	Myl12b
Gab3	1.15125033919006e-15	-0.549457	0.191	0.293	1.90531931135956e-11	0.icl2	Gab3
Lbr	1.15663639258085e-15	0.521912	0.426	0.374	1.91423322972131e-11	0.icl2	Lbr
Usp28	1.17759490523958e-15	1.09366	0.166	0.105	1.94891956817151e-11	0.icl2	Usp28
Slamf9	1.18499037193167e-15	-6.72779	0	0.029	1.96115906554691e-11	0.icl2	Slamf9
Arl15	1.1853877777095e-15	0.414308	0.509	0.442	1.96181677210923e-11	0.icl2	Arl15
[truncated: 76,552 more rows]

## Sheet: adt_markers_WT_ECTV_d1-0.2
	p_val	avg_log2FC	pct.1	pct.2	p_val_adj	cluster	gene
CD27-TotalSeq-B0191-anti-mouse-rat-human	0	1.28193	0.995	0.956	0	0.icl2	CD27-TotalSeq-B0191-anti-mouse-rat-human
CD11b-TotalSeq-B0014-anti-mouse-human	1.78671535072659e-297	-3.6755	0.874	0.952	3.39475916638051e-296	0.icl2	CD11b-TotalSeq-B0014-anti-mouse-human
CD11c-TotalSeq-B0106-anti-mouse	2.13379232080888e-175	-2.57091	0.812	0.91	4.05420540953687e-174	0.icl2	CD11c-TotalSeq-B0106-anti-mouse
CD169-TotalSeq-B0440-anti-mouse	2.79599262366818e-164	-2.24897	0.439	0.708	5.31238598496955e-163	0.icl2	CD169-TotalSeq-B0440-anti-mouse
CD8-TotalSeq-B0002-anti-mouse	1.26969388444518e-112	1.02042	0.995	0.995	2.41241838044585e-111	0.icl2	CD8-TotalSeq-B0002-anti-mouse
MHCII-TotalSeq-B0117-anti-mouse	6.28371558320615e-111	-3.01311	0.999	0.999	1.19390596080917e-109	0.icl2	MHCII-TotalSeq-B0117-anti-mouse
NKp46-TotalSeq-B0184-anti-mouse	6.88703103740499e-76	-2.65568	0.343	0.534	1.30853589710695e-74	0.icl2	NKp46-TotalSeq-B0184-anti-mouse
CD103-TotalSeq-B0201-anti-mouse	1.10072522992068e-75	-0.882188	0.963	0.931	2.09137793684929e-74	0.icl2	CD103-TotalSeq-B0201-anti-mouse
F4-80-TotalSeq-B0114-anti-mouse	2.59276193168775e-64	0.272693	0.996	0.995	4.92624767020673e-63	0.icl2	F4-80-TotalSeq-B0114-anti-mouse
CD64-TotalSeq-B0202-anti-mouse	1.78494851227268e-50	0.291759	0.973	0.98	3.3914021733181e-49	0.icl2	CD64-TotalSeq-B0202-anti-mouse
CD4-TotalSeq-B0001-anti-mouse	2.05094586086475e-41	-1.75893	0.844	0.902	3.89679713564303e-40	0.icl2	CD4-TotalSeq-B0001-anti-mouse
Ly6C-TotalSeq-B0013-anti-mouse	2.2766146176254e-39	-0.441163	1	0.999	4.32556777348827e-38	0.icl2	Ly6C-TotalSeq-B0013-anti-mouse
CD80-TotalSeq-B0849-anti-mouse	1.8590532174474e-34	-0.457847	0.995	0.997	3.53220111315006e-33	0.icl2	CD80-TotalSeq-B0849-anti-mouse
Rat-IgG2a---Isotype-Ctrl-B0238-anti-mouse	8.41573002421375e-34	0.26382	0.935	0.953	1.59898870460061e-32	0.icl2	Rat-IgG2a---Isotype-Ctrl-B0238-anti-mouse
SiglecH-TotalSeq-B0119-anti-mouse	3.45304522521086e-32	-0.177342	0.99	0.991	6.56078592790063e-31	0.icl2	SiglecH-TotalSeq-B0119-anti-mouse
CD86-TotalSeq-B0200-anti-mouse	1.39413931695098e-22	0.433788	0.942	0.938	2.64886470220686e-21	0.icl2	CD86-TotalSeq-B0200-anti-mouse
NK1-1-TotalSeq-B0118-anti-mouse	6.09674510321569e-05	-1.30549	0.942	0.953	0.00115838	0.icl2	NK1-1-TotalSeq-B0118-anti-mouse
CD103-TotalSeq-B0201-anti-mouse.1	0	3.58605	0.997	0.933	0	1.ilc1/3	CD103-TotalSeq-B0201-anti-mouse
CD169-TotalSeq-B0440-anti-mouse.1	5.03909817748798e-176	1.94382	0.838	0.576	9.57428653722716e-175	1.ilc1/3	CD169-TotalSeq-B0440-anti-mouse
CD27-TotalSeq-B0191-anti-mouse-rat-human.1	1.59040791719434e-152	-1.78801	0.916	0.979	3.02177504266925e-151	1.ilc1/3	CD27-TotalSeq-B0191-anti-mouse-rat-human
CD86-TotalSeq-B0200-anti-mouse.1	2.13284632646814e-82	-1.62149	0.897	0.947	4.05240802028947e-81	1.ilc1/3	CD86-TotalSeq-B0200-anti-mouse
Ly6C-TotalSeq-B0013-anti-mouse.1	1.68796452424459e-59	-1.30206	0.998	1	3.20713259606472e-58	1.ilc1/3	Ly6C-TotalSeq-B0013-anti-mouse
CD4-TotalSeq-B0001-anti-mouse.1	4.58285576895032e-37	-1.53365	0.943	0.871	8.70742596100561e-36	1.ilc1/3	CD4-TotalSeq-B0001-anti-mouse
CD11c-TotalSeq-B0106-anti-mouse.1	5.32587802101844e-34	-1.94127	0.865	0.878	1.0119168239935e-32	1.ilc1/3	CD11c-TotalSeq-B0106-anti-mouse
CD8-TotalSeq-B0002-anti-mouse.1	3.26965663006376e-33	-1.61735	0.992	0.995	6.21234759712115e-32	1.ilc1/3	CD8-TotalSeq-B0002-anti-mouse
NKp46-TotalSeq-B0184-anti-mouse.1	2.56393884973927e-25	-2.13293	0.368	0.485	4.87148381450461e-24	1.ilc1/3	NKp46-TotalSeq-B0184-anti-mouse
NK1-1-TotalSeq-B0118-anti-mouse.1	2.8336754632016e-25	-1.23551	0.942	0.951	5.38398338008304e-24	1.ilc1/3	NK1-1-TotalSeq-B0118-anti-mouse
CD11b-TotalSeq-B0014-anti-mouse-human.1	2.64478818825323e-17	-1.96662	0.96	0.919	5.02509755768114e-16	1.ilc1/3	CD11b-TotalSeq-B0014-anti-mouse-human
SiglecH-TotalSeq-B0119-anti-mouse.1	7.81160241193088e-06	-0.411582	0.993	0.99	0.00014842	1.ilc1/3	SiglecH-TotalSeq-B0119-anti-mouse
F4-80-TotalSeq-B0114-anti-mouse.1	0.00113496	-0.103964	0.995	0.996	0.0215642	1.ilc1/3	F4-80-TotalSeq-B0114-anti-mouse
NKp46-TotalSeq-B0184-anti-mouse.2	0	3.92067	0.991	0.402	0	2.NK	NKp46-TotalSeq-B0184-anti-mouse
NK1-1-TotalSeq-B0118-anti-mouse.2	0	3.03652	0.999	0.943	0	2.NK	NK1-1-TotalSeq-B0118-anti-mouse
CD11c-TotalSeq-B0106-anti-mouse.2	1.44712408853016e-208	1.09766	0.985	0.862	2.7495357682073e-207	2.NK	CD11c-TotalSeq-B0106-anti-mouse
CD103-TotalSeq-B0201-anti-mouse.2	3.45262838023073e-186	-4.66277	0.866	0.952	6.55999392243839e-185	2.NK	CD103-TotalSeq-B0201-anti-mouse
CD11b-TotalSeq-B0014-anti-mouse-human.2	1.40042179813711e-171	0.347863	0.99	0.917	2.66080141646051e-170	2.NK	CD11b-TotalSeq-B0014-anti-mouse-human
Ly6C-TotalSeq-B0013-anti-mouse.2	1.81075715727893e-50	-1.1669	1	0.999	3.44043859882996e-49	2.NK	Ly6C-TotalSeq-B0013-anti-mouse
CD80-TotalSeq-B0849-anti-mouse.1	7.76844979912234e-50	-0.595855	0.994	0.996	1.47600546183324e-48	2.NK	CD80-TotalSeq-B0849-anti-mouse
CD86-TotalSeq-B0200-anti-mouse.2	3.76522144652063e-44	-1.46978	0.906	0.944	7.15392074838919e-43	2.NK	CD86-TotalSeq-B0200-anti-mouse
CD8-TotalSeq-B0002-anti-mouse.2	1.91256052836655e-43	-1.92414	0.996	0.995	3.63386500389644e-42	2.NK	CD8-TotalSeq-B0002-anti-mouse
CD27-TotalSeq-B0191-anti-mouse-rat-human.2	1.98296896291189e-26	-1.24792	0.972	0.97	3.76764102953259e-25	2.NK	CD27-TotalSeq-B0191-anti-mouse-rat-human
SiglecH-TotalSeq-B0119-anti-mouse.2	2.6034080994486e-21	-0.583039	0.987	0.991	4.94647538895235e-20	2.NK	SiglecH-TotalSeq-B0119-anti-mouse
CD207-TotalSeq-B0437-anti-mouse-human-Langerin	7.5661277501201e-20	-0.368169	0.96	0.965	1.43756427252282e-18	2.NK	CD207-TotalSeq-B0437-anti-mouse-human-Langerin
MHCII-TotalSeq-B0117-anti-mouse.1	5.42691200431198e-18	-2.36473	1	0.999	1.03111328081928e-16	2.NK	MHCII-TotalSeq-B0117-anti-mouse
F4-80-TotalSeq-B0114-anti-mouse.2	7.3735163924499e-17	-0.264169	0.993	0.996	1.40096811456548e-15	2.NK	F4-80-TotalSeq-B0114-anti-mouse
CD64-TotalSeq-B0202-anti-mouse.1	1.01589855960122e-16	-0.288923	0.975	0.978	1.93020726324232e-15	2.NK	CD64-TotalSeq-B0202-anti-mouse
Ly6G-TotalSeq-B0015-anti-mouse	4.48757477442156e-14	-4.69656	0.573	0.646	8.52639207140097e-13	2.NK	Ly6G-TotalSeq-B0015-anti-mouse
CD4-TotalSeq-B0001-anti-mouse.2	6.28966734923068e-11	-2.37779	0.855	0.885	1.19503679635383e-09	2.NK	CD4-TotalSeq-B0001-anti-mouse
Rat-IgG2a---Isotype-Ctrl-B0238-anti-mouse.1	2.86923320775219e-09	-0.238657	0.947	0.947	5.45154309472915e-08	2.NK	Rat-IgG2a---Isotype-Ctrl-B0238-anti-mouse
CD169-TotalSeq-B0440-anti-mouse.2	0.000100873	0.127466	0.67	0.607	0.0019166	2.NK	CD169-TotalSeq-B0440-anti-mouse
Ly6C-TotalSeq-B0013-anti-mouse.3	5.20872240104391e-229	1.87041	1	0.999	9.89657256198342e-228	3.ilc2	Ly6C-TotalSeq-B0013-anti-mouse
CD103-TotalSeq-B0201-anti-mouse.3	1.7205768085924e-93	-4.57244	0.849	0.95	3.26909593632557e-92	3.ilc2	CD103-TotalSeq-B0201-anti-mouse
CD27-TotalSeq-B0191-anti-mouse-rat-human.3	1.80245424255789e-88	0.895925	1	0.967	3.42466306086e-87	3.ilc2	CD27-TotalSeq-B0191-anti-mouse-rat-human
CD86-TotalSeq-B0200-anti-mouse.3	1.46662565610208e-48	0.59705	0.985	0.936	2.78658874659395e-47	3.ilc2	CD86-TotalSeq-B0200-anti-mouse
CD11b-TotalSeq-B0014-anti-mouse-human.3	6.93326165624427e-41	-3.47808	0.856	0.93	1.31731971468641e-39	3.ilc2	CD11b-TotalSeq-B0014-anti-mouse-human
CD169-TotalSeq-B0440-anti-mouse.3	1.19230992787588e-22	-1.68653	0.448	0.627	2.26538886296417e-21	3.ilc2	CD169-TotalSeq-B0440-anti-mouse
CD4-TotalSeq-B0001-anti-mouse.3	6.83456960879946e-21	-2.95555	0.83	0.886	1.2985682256719e-19	3.ilc2	CD4-TotalSeq-B0001-anti-mouse
CD11c-TotalSeq-B0106-anti-mouse.3	1.18158644177084e-14	-1.77875	0.851	0.878	2.2450142393646e-13	3.ilc2	CD11c-TotalSeq-B0106-anti-mouse
MHCII-TotalSeq-B0117-anti-mouse.2	4.59284157738885e-13	-2.68114	0.998	0.999	8.72639899703881e-12	3.ilc2	MHCII-TotalSeq-B0117-anti-mouse
NK1-1-TotalSeq-B0118-anti-mouse.3	7.27554948782639e-12	0.266522	0.934	0.951	1.38235440268701e-10	3.ilc2	NK1-1-TotalSeq-B0118-anti-mouse
F4-80-TotalSeq-B0114-anti-mouse.3	1.32272393573605e-08	0.152227	0.992	0.996	2.51317547789849e-07	3.ilc2	F4-80-TotalSeq-B0114-anti-mouse
Rat-IgG2a---Isotype-Ctrl-B0238-anti-mouse.2	3.07130425475972e-08	0.198125	0.934	0.948	5.83547808404346e-07	3.ilc2	Rat-IgG2a---Isotype-Ctrl-B0238-anti-mouse
CD64-TotalSeq-B0202-anti-mouse.2	1.92563009492749e-07	0.194247	0.968	0.979	3.65869718036223e-06	3.ilc2	CD64-TotalSeq-B0202-anti-mouse
CD80-TotalSeq-B0849-anti-mouse.2	3.12394534220017e-06	-0.375495	0.993	0.996	5.93549615018033e-05	3.ilc2	CD80-TotalSeq-B0849-anti-mouse
SiglecH-TotalSeq-B0119-anti-mouse.3	7.79687786753569e-05	-0.149476	0.986	0.991	0.00148141	3.ilc2	SiglecH-TotalSeq-B0119-anti-mouse
NKp46-TotalSeq-B0184-anti-mouse.3	0.00921114	-0.750781	0.407	0.473	0.175012	3.ilc2	NKp46-TotalSeq-B0184-anti-mouse
MHCII-TotalSeq-B0117-anti-mouse.3	3.31251352671237e-203	4.42035	1	0.999	6.29377570075349e-202	4.mDC	MHCII-TotalSeq-B0117-anti-mouse
Ly6C-TotalSeq-B0013-anti-mouse.4	1.84975580355466e-108	-1.83177	1	0.999	3.51453602675385e-107	4.mDC	Ly6C-TotalSeq-B0013-anti-mouse
CD11c-TotalSeq-B0106-anti-mouse.4	9.43328625805139e-89	1.51738	0.997	0.871	1.79232438902976e-87	4.mDC	CD11c-TotalSeq-B0106-anti-mouse
CD86-TotalSeq-B0200-anti-mouse.4	2.38098112161281e-77	1.60752	0.997	0.937	4.52386413106434e-76	4.mDC	CD86-TotalSeq-B0200-anti-mouse
CD80-TotalSeq-B0849-anti-mouse.3	1.32697293418804e-75	1.52515	1	0.996	2.52124857495727e-74	4.mDC	CD80-TotalSeq-B0849-anti-mouse
CD27-TotalSeq-B0191-anti-mouse-rat-human.4	1.34267823941954e-72	-2.45178	0.952	0.971	2.55108865489713e-71	4.mDC	CD27-TotalSeq-B0191-anti-mouse-rat-human
CD103-TotalSeq-B0201-anti-mouse.4	1.07597389195138e-45	-4.04768	0.929	0.943	2.04435039470763e-44	4.mDC	CD103-TotalSeq-B0201-anti-mouse
NK1-1-TotalSeq-B0118-anti-mouse.4	1.61064166295373e-24	-1.30836	0.969	0.948	3.06021915961208e-23	4.mDC	NK1-1-TotalSeq-B0118-anti-mouse
F4-80-TotalSeq-B0114-anti-mouse.4	9.92608767806857e-16	-0.361513	1	0.995	1.88595665883303e-14	4.mDC	F4-80-TotalSeq-B0114-anti-mouse
SiglecH-TotalSeq-B0119-anti-mouse.4	3.26326752466377e-13	-0.552452	1	0.99	6.20020829686116e-12	4.mDC	SiglecH-TotalSeq-B0119-anti-mouse
CD11b-TotalSeq-B0014-anti-mouse-human.4	5.77535348794316e-12	-0.886847	0.972	0.923	1.0973171627092e-10	4.mDC	CD11b-TotalSeq-B0014-anti-mouse-human
CD64-TotalSeq-B0202-anti-mouse.3	7.68528897508422e-09	-0.323492	0.994	0.977	1.460204905266e-07	4.mDC	CD64-TotalSeq-B0202-anti-mouse
Rat-IgG2a---Isotype-Ctrl-B0238-anti-mouse.3	1.26540248766917e-08	-0.334557	0.98	0.945	2.40426472657142e-07	4.mDC	Rat-IgG2a---Isotype-Ctrl-B0238-anti-mouse
CD8-TotalSeq-B0002-anti-mouse.3	2.14362132185554e-07	-0.616693	0.997	0.995	4.07288051152553e-06	4.mDC	CD8-TotalSeq-B0002-anti-mouse
NKp46-TotalSeq-B0184-anti-mouse.4	0.000435304	-1.07882	0.653	0.459	0.00827078	4.mDC	NKp46-TotalSeq-B0184-anti-mouse
CD207-TotalSeq-B0437-anti-mouse-human-Langerin.1	0.0033774	0.209563	0.989	0.963	0.0641707	4.mDC	CD207-TotalSeq-B0437-anti-mouse-human-Langerin
CD27-TotalSeq-B0191-anti-mouse-rat-human.5	1.61554813166573e-57	1.16598	1	0.969	3.06954145016488e-56	5.ilc2	CD27-TotalSeq-B0191-anti-mouse-rat-human
CD86-TotalSeq-B0200-anti-mouse.5	2.55290073392006e-32	1.384	0.993	0.938	4.85051139444812e-31	5.ilc2	CD86-TotalSeq-B0200-anti-mouse
CD11b-TotalSeq-B0014-anti-mouse-human.5	1.55273158130337e-20	-2.88628	0.863	0.927	2.9501900044764e-19	5.ilc2	CD11b-TotalSeq-B0014-anti-mouse-human
Ly6C-TotalSeq-B0013-anti-mouse.5	2.9707963021805e-11	0.45258	1	0.999	5.64451297414295e-10	5.ilc2	Ly6C-TotalSeq-B0013-anti-mouse
CD169-TotalSeq-B0440-anti-mouse.4	9.95562993452338e-11	-1.56148	0.469	0.619	1.89156968755944e-09	5.ilc2	CD169-TotalSeq-B0440-anti-mouse
CD11c-TotalSeq-B0106-anti-mouse.5	1.01947712432473e-06	-1.64537	0.819	0.878	1.93700653621698e-05	5.ilc2	CD11c-TotalSeq-B0106-anti-mouse
CD103-TotalSeq-B0201-anti-mouse.5	1.25199304367284e-06	-1.98038	0.93	0.943	2.3787867829784e-05	5.ilc2	CD103-TotalSeq-B0201-anti-mouse
NKp46-TotalSeq-B0184-anti-mouse.5	2.77721456184277e-06	-1.81446	0.343	0.472	5.27670766750126e-05	5.ilc2	NKp46-TotalSeq-B0184-anti-mouse
F4-80-TotalSeq-B0114-anti-mouse.5	7.15063148896789e-06	0.16969	1	0.995	0.000135862	5.ilc2	F4-80-TotalSeq-B0114-anti-mouse
Rat-IgG2a---Isotype-Ctrl-B0238-anti-mouse.4	0.00735248	0.164917	0.945	0.947	0.139697	5.ilc2	Rat-IgG2a---Isotype-Ctrl-B0238-anti-mouse
NK1-1-TotalSeq-B0118-anti-mouse.5	0.00857981	-0.994401	0.93	0.95	0.163016	5.ilc2	NK1-1-TotalSeq-B0118-anti-mouse
SiglecH-TotalSeq-B0119-anti-mouse.5	7.04292327876503e-119	3.19323	1	0.991	1.33815542296536e-117	6.pDC	SiglecH-TotalSeq-B0119-anti-mouse
CD4-TotalSeq-B0001-anti-mouse.4	1.34752259556013e-89	3.32375	1	0.879	2.56029293156425e-88	6.pDC	CD4-TotalSeq-B0001-anti-mouse
CD11c-TotalSeq-B0106-anti-mouse.6	1.25487741667737e-76	1.9221	1	0.873	2.384267091687e-75	6.pDC	CD11c-TotalSeq-B0106-anti-mouse
CD27-TotalSeq-B0191-anti-mouse-rat-human.6	4.60009489199092e-52	-2.78945	0.931	0.971	8.74018029478276e-51	6.pDC	CD27-TotalSeq-B0191-anti-mouse-rat-human
MHCII-TotalSeq-B0117-anti-mouse.4	1.13267386566335e-48	0.338153	1	0.999	2.15208034476037e-47	6.pDC	MHCII-TotalSeq-B0117-anti-mouse
Ly6C-TotalSeq-B0013-anti-mouse.6	2.64343993640005e-43	1.61696	1	0.999	5.02253587916009e-42	6.pDC	Ly6C-TotalSeq-B0013-anti-mouse
CD80-TotalSeq-B0849-anti-mouse.4	4.07422745434267e-36	-0.864334	1	0.996	7.74103216325108e-35	6.pDC	CD80-TotalSeq-B0849-anti-mouse
NK1-1-TotalSeq-B0118-anti-mouse.6	1.51604306154274e-32	-1.95285	0.952	0.949	2.88048181693121e-31	6.pDC	NK1-1-TotalSeq-B0118-anti-mouse
F4-80-TotalSeq-B0114-anti-mouse.6	5.50020041611471e-32	-0.82409	1	0.995	1.0450380790618e-30	6.pDC	F4-80-TotalSeq-B0114-anti-mouse
CD8-TotalSeq-B0002-anti-mouse.4	6.14230443317265e-32	1.38098	1	0.995	1.1670378423028e-30	6.pDC	CD8-TotalSeq-B0002-anti-mouse
CD103-TotalSeq-B0201-anti-mouse.6	3.44880304459811e-31	-4.23332	0.894	0.943	6.55272578473641e-30	6.pDC	CD103-TotalSeq-B0201-anti-mouse
CD86-TotalSeq-B0200-anti-mouse.6	3.0609067818989e-25	-1.74343	0.931	0.94	5.81572288560791e-24	6.pDC	CD86-TotalSeq-B0200-anti-mouse
CD207-TotalSeq-B0437-anti-mouse-human-Langerin.2	1.02856578700348e-17	-0.678974	0.979	0.964	1.95427499530661e-16	6.pDC	CD207-TotalSeq-B0437-anti-mouse-human-Langerin
CD64-TotalSeq-B0202-anti-mouse.4	1.37802942759882e-17	-0.602514	0.979	0.978	2.61825591243776e-16	6.pDC	CD64-TotalSeq-B0202-anti-mouse
CD11b-TotalSeq-B0014-anti-mouse-human.6	1.5270921687062e-13	-2.12696	0.942	0.925	2.90147512054178e-12	6.pDC	CD11b-TotalSeq-B0014-anti-mouse-human
Rat-IgG2a---Isotype-Ctrl-B0238-anti-mouse.5	3.26996327864741e-13	-0.568662	0.963	0.946	6.21293022943008e-12	6.pDC	Rat-IgG2a---Isotype-Ctrl-B0238-anti-mouse
CD169-TotalSeq-B0440-anti-mouse.5	8.23251108091632e-09	-1.31596	0.577	0.615	1.5641771053741e-07	6.pDC	CD169-TotalSeq-B0440-anti-mouse
NKp46-TotalSeq-B0184-anti-mouse.6	8.68640047864037e-06	-2.46711	0.418	0.469	0.000165042	6.pDC	NKp46-TotalSeq-B0184-anti-mouse
Ly6G-TotalSeq-B0015-anti-mouse.1	0.000997517	-3.0435	0.677	0.637	0.0189528	6.pDC	Ly6G-TotalSeq-B0015-anti-mouse
CD27-TotalSeq-B0191-anti-mouse-rat-human.7	7.84211150004856e-33	0.895263	1	0.969	1.49000118500923e-31	7.ilc3	CD27-TotalSeq-B0191-anti-mouse-rat-human
CD169-TotalSeq-B0440-anti-mouse.6	2.62630941276221e-22	1.12655	0.779	0.608	4.9899878842482e-21	7.ilc3	CD169-TotalSeq-B0440-anti-mouse
CD86-TotalSeq-B0200-anti-mouse.7	5.80757626437993e-22	-1.5386	0.861	0.942	1.10343949023219e-20	7.ilc3	CD86-TotalSeq-B0200-anti-mouse
CD8-TotalSeq-B0002-anti-mouse.5	5.53276474184345e-21	-1.74806	1	0.995	1.05122530095026e-19	7.ilc3	CD8-TotalSeq-B0002-anti-mouse
CD103-TotalSeq-B0201-anti-mouse.7	5.11321119048726e-10	0.480586	0.981	0.941	9.71510126192579e-09	7.ilc3	CD103-TotalSeq-B0201-anti-mouse
Ly6C-TotalSeq-B0013-anti-mouse.7	2.88594377765274e-08	-1.11564	1	0.999	5.4832931775402e-07	7.ilc3	Ly6C-TotalSeq-B0013-anti-mouse
CD11c-TotalSeq-B0106-anti-mouse.7	4.65689830417751e-07	-1.70249	0.843	0.877	8.84810677793727e-06	7.ilc3	CD11c-TotalSeq-B0106-anti-mouse
CD11b-TotalSeq-B0014-anti-mouse-human.7	0.000107436	-1.92265	0.963	0.924	0.00204128	7.ilc3	CD11b-TotalSeq-B0014-anti-mouse-human
NK1-1-TotalSeq-B0118-anti-mouse.7	0.000669764	-1.03507	0.921	0.95	0.0127255	7.ilc3	NK1-1-TotalSeq-B0118-anti-mouse
NKp46-TotalSeq-B0184-anti-mouse.7	0.000786884	-1.64024	0.393	0.47	0.0149508	7.ilc3	NKp46-TotalSeq-B0184-anti-mouse
MHCII-TotalSeq-B0117-anti-mouse.5	0.000806143	-0.619578	1	0.999	0.0153167	7.ilc3	MHCII-TotalSeq-B0117-anti-mouse
CD64-TotalSeq-B0202-anti-mouse.5	0.00231354	0.161324	0.989	0.977	0.0439572	7.ilc3	CD64-TotalSeq-B0202-anti-mouse
CD11b-TotalSeq-B0014-anti-mouse-human.8	9.4551007882158e-117	3.20567	1	0.923	1.796469149761e-115	8.iMOS	CD11b-TotalSeq-B0014-anti-mouse-human
CD80-TotalSeq-B0849-anti-mouse.5	2.52671828626095e-69	1.0313	0.995	0.996	4.80076474389581e-68	8.iMOS	CD80-TotalSeq-B0849-anti-mouse
CD27-TotalSeq-B0191-anti-mouse-rat-human.8	2.09206899000272e-56	-2.80659	0.949	0.97	3.97493108100518e-55	8.iMOS	CD27-TotalSeq-B0191-anti-mouse-rat-human
CD8-TotalSeq-B0002-anti-mouse.6	4.12929129231379e-44	-2.48648	0.991	0.995	7.8456534553962e-43	8.iMOS	CD8-TotalSeq-B0002-anti-mouse
F4-80-TotalSeq-B0114-anti-mouse.7	2.32435083835858e-29	0.782739	0.995	0.995	4.4162665928813e-28	8.iMOS	F4-80-TotalSeq-B0114-anti-mouse
NK1-1-TotalSeq-B0118-anti-mouse.8	2.6125270449269e-26	-1.65513	0.949	0.949	4.96380138536111e-25	8.iMOS	NK1-1-TotalSeq-B0118-anti-mouse
CD169-TotalSeq-B0440-anti-mouse.7	7.53041088923975e-20	0.661111	0.916	0.606	1.43077806895555e-18	8.iMOS	CD169-TotalSeq-B0440-anti-mouse
Ly6C-TotalSeq-B0013-anti-mouse.8	1.15511207838286e-18	2.04322	1	0.999	2.19471294892744e-17	8.iMOS	Ly6C-TotalSeq-B0013-anti-mouse
SiglecH-TotalSeq-B0119-anti-mouse.6	8.54681839015617e-12	-0.633803	0.986	0.991	1.62389549412967e-10	8.iMOS	SiglecH-TotalSeq-B0119-anti-mouse
CD103-TotalSeq-B0201-anti-mouse.8	1.76547203514126e-10	-3.04567	0.977	0.941	3.35439686676839e-09	8.iMOS	CD103-TotalSeq-B0201-anti-mouse
Rat-IgG2a---Isotype-Ctrl-B0238-anti-mouse.6	9.03094744267531e-10	-0.420397	0.953	0.947	1.71588001410831e-08	8.iMOS	Rat-IgG2a---Isotype-Ctrl-B0238-anti-mouse
CD11c-TotalSeq-B0106-anti-mouse.8	1.16144332654309e-08	1.0995	0.967	0.874	2.20674232043186e-07	8.iMOS	CD11c-TotalSeq-B0106-anti-mouse
CD64-TotalSeq-B0202-anti-mouse.6	0.00085832	0.210102	0.986	0.977	0.0163081	8.iMOS	CD64-TotalSeq-B0202-anti-mouse
CD4-TotalSeq-B0001-anti-mouse.5	0.00557245	-1.1229	0.851	0.883	0.105877	8.iMOS	CD4-TotalSeq-B0001-anti-mouse
CD11c-TotalSeq-B0106-anti-mouse.9	2.23526261936028e-60	3.24498	0.974	0.874	4.24699897678453e-59	9.cDC1+matcDC	CD11c-TotalSeq-B0106-anti-mouse
MHCII-TotalSeq-B0117-anti-mouse.6	1.26691102228771e-50	1.74849	1	0.999	2.40713094234665e-49	9.cDC1+matcDC	MHCII-TotalSeq-B0117-anti-mouse
CD27-TotalSeq-B0191-anti-mouse-rat-human.9	1.8055990373071e-42	-2.61806	0.929	0.971	3.43063817088348e-41	9.cDC1+matcDC	CD27-TotalSeq-B0191-anti-mouse-rat-human
CD11b-TotalSeq-B0014-anti-mouse-human.9	5.84600341643482e-20	0.325625	0.994	0.924	1.11074064912262e-18	9.cDC1+matcDC	CD11b-TotalSeq-B0014-anti-mouse-human
NK1-1-TotalSeq-B0118-anti-mouse.9	4.570207835224e-19	-1.47243	0.942	0.949	8.6833948869256e-18	9.cDC1+matcDC	NK1-1-TotalSeq-B0118-anti-mouse
CD80-TotalSeq-B0849-anti-mouse.6	1.03115375337735e-17	0.500533	1	0.996	1.95919213141697e-16	9.cDC1+matcDC	CD80-TotalSeq-B0849-anti-mouse
CD64-TotalSeq-B0202-anti-mouse.7	9.64709554122448e-14	-0.554113	0.987	0.978	1.83294815283265e-12	9.cDC1+matcDC	CD64-TotalSeq-B0202-anti-mouse
CD4-TotalSeq-B0001-anti-mouse.6	2.73344730406569e-11	-0.508568	0.994	0.88	5.19354987772481e-10	9.cDC1+matcDC	CD4-TotalSeq-B0001-anti-mouse
Rat-IgG2a---Isotype-Ctrl-B0238-anti-mouse.7	1.83871137090953e-10	-0.534238	0.962	0.946	3.4935516047281e-09	9.cDC1+matcDC	Rat-IgG2a---Isotype-Ctrl-B0238-anti-mouse
CD8-TotalSeq-B0002-anti-mouse.7	9.5246253006786e-10	1.12792	0.994	0.995	1.80967880712893e-08	9.cDC1+matcDC	CD8-TotalSeq-B0002-anti-mouse
F4-80-TotalSeq-B0114-anti-mouse.8	8.84874532519651e-09	-0.304223	0.994	0.996	1.68126161178734e-07	9.cDC1+matcDC	F4-80-TotalSeq-B0114-anti-mouse
CD103-TotalSeq-B0201-anti-mouse.9	5.42778608843909e-07	-2.04242	0.974	0.942	1.03127935680343e-05	9.cDC1+matcDC	CD103-TotalSeq-B0201-anti-mouse
CD169-TotalSeq-B0440-anti-mouse.8	1.74468094971402e-05	0.322109	0.808	0.61	0.000331489	9.cDC1+matcDC	CD169-TotalSeq-B0440-anti-mouse
CD11c-TotalSeq-B0106-anti-mouse.10	6.63463317386962e-72	2.57312	0.978	0.873	1.26058030303523e-70	10.cDC1+matDC	CD11c-TotalSeq-B0106-anti-mouse
CD8-TotalSeq-B0002-anti-mouse.8	3.1764423170611e-66	1.91155	1	0.995	6.03524040241609e-65	10.cDC1+matDC	CD8-TotalSeq-B0002-anti-mouse
MHCII-TotalSeq-B0117-anti-mouse.7	8.71538405438209e-53	1.10386	1	0.999	1.6559229703326e-51	10.cDC1+matDC	MHCII-TotalSeq-B0117-anti-mouse
Ly6C-TotalSeq-B0013-anti-mouse.9	1.18740214106532e-39	-1.46181	1	0.999	2.25606406802412e-38	10.cDC1+matDC	Ly6C-TotalSeq-B0013-anti-mouse
CD27-TotalSeq-B0191-anti-mouse-rat-human.10	1.19676623204485e-39	-1.8868	0.921	0.971	2.27385584088522e-38	10.cDC1+matDC	CD27-TotalSeq-B0191-anti-mouse-rat-human
CD80-TotalSeq-B0849-anti-mouse.7	2.62013354163833e-19	0.196449	1	0.996	4.97825372911283e-18	10.cDC1+matDC	CD80-TotalSeq-B0849-anti-mouse
NK1-1-TotalSeq-B0118-anti-mouse.10	5.47770732077162e-19	-1.5465	0.93	0.95	1.04076439094661e-17	10.cDC1+matDC	NK1-1-TotalSeq-B0118-anti-mouse
F4-80-TotalSeq-B0114-anti-mouse.9	1.50749207663541e-13	-0.424747	0.991	0.996	2.86423494560727e-12	10.cDC1+matDC	F4-80-TotalSeq-B0114-anti-mouse
SiglecH-TotalSeq-B0119-anti-mouse.7	2.68937492359331e-08	-0.441036	0.996	0.991	5.10981235482729e-07	10.cDC1+matDC	SiglecH-TotalSeq-B0119-anti-mouse
CD64-TotalSeq-B0202-anti-mouse.8	5.27049218081856e-08	-0.330487	0.987	0.977	1.00139351435553e-06	10.cDC1+matDC	CD64-TotalSeq-B0202-anti-mouse
Rat-IgG2a---Isotype-Ctrl-B0238-anti-mouse.8	1.11156494150087e-06	-0.27513	0.956	0.946	2.11197338885166e-05	10.cDC1+matDC	Rat-IgG2a---Isotype-Ctrl-B0238-anti-mouse
NKp46-TotalSeq-B0184-anti-mouse.8	1.09929831913361e-05	-2.20794	0.405	0.47	0.000208867	10.cDC1+matDC	NKp46-TotalSeq-B0184-anti-mouse
Ly6G-TotalSeq-B0015-anti-mouse.2	1.14837210851196e-05	-4.59506	0.59	0.639	0.000218191	10.cDC1+matDC	Ly6G-TotalSeq-B0015-anti-mouse
CD103-TotalSeq-B0201-anti-mouse.10	0.000546513	-1.65652	0.987	0.941	0.0103837	10.cDC1+matDC	CD103-TotalSeq-B0201-anti-mouse
CD86-TotalSeq-B0200-anti-mouse.8	0.00810327	-0.923276	0.956	0.939	0.153962	10.cDC1+matDC	CD86-TotalSeq-B0200-anti-mouse
Ly6G-TotalSeq-B0015-anti-mouse.3	4.66670170197104e-159	7.98748	1	0.627	8.86673323374497e-158	11.Neutro	Ly6G-TotalSeq-B0015-anti-mouse
CD11b-TotalSeq-B0014-anti-mouse-human.10	2.24733397430438e-145	4.74268	1	0.923	4.26993455117832e-144	11.Neutro	CD11b-TotalSeq-B0014-anti-mouse-human
CD27-TotalSeq-B0191-anti-mouse-rat-human.11	7.3001355811656e-66	-2.89888	0.949	0.97	1.38702576042146e-64	11.Neutro	CD27-TotalSeq-B0191-anti-mouse-rat-human
CD8-TotalSeq-B0002-anti-mouse.9	9.26906288933485e-60	-2.18056	0.992	0.995	1.76112194897362e-58	11.Neutro	CD8-TotalSeq-B0002-anti-mouse
Ly6C-TotalSeq-B0013-anti-mouse.10	1.38141331003487e-43	0.188608	1	0.999	2.62468528906626e-42	11.Neutro	Ly6C-TotalSeq-B0013-anti-mouse
CD103-TotalSeq-B0201-anti-mouse.11	8.95189864730943e-41	-3.60679	0.899	0.944	1.70086074298879e-39	11.Neutro	CD103-TotalSeq-B0201-anti-mouse
MHCII-TotalSeq-B0117-anti-mouse.8	2.64285550966508e-32	-2.42079	1	0.999	5.02142546836364e-31	11.Neutro	MHCII-TotalSeq-B0117-anti-mouse
NK1-1-TotalSeq-B0118-anti-mouse.11	8.38654485365948e-22	-1.43393	0.954	0.949	1.5934435221953e-20	11.Neutro	NK1-1-TotalSeq-B0118-anti-mouse
CD64-TotalSeq-B0202-anti-mouse.9	3.78509095342013e-19	-0.579846	0.996	0.977	7.19167281149824e-18	11.Neutro	CD64-TotalSeq-B0202-anti-mouse
SiglecH-TotalSeq-B0119-anti-mouse.8	2.56417881358543e-18	-0.724349	0.996	0.991	4.87193974581232e-17	11.Neutro	SiglecH-TotalSeq-B0119-anti-mouse
F4-80-TotalSeq-B0114-anti-mouse.10	2.07079086463274e-16	-0.499803	1	0.995	3.93450264280221e-15	11.Neutro	F4-80-TotalSeq-B0114-anti-mouse
CD80-TotalSeq-B0849-anti-mouse.8	2.36216693020565e-16	0.25245	1	0.996	4.48811716739074e-15	11.Neutro	CD80-TotalSeq-B0849-anti-mouse
CD86-TotalSeq-B0200-anti-mouse.9	1.78134786092158e-14	-1.51795	0.928	0.94	3.384560935751e-13	11.Neutro	CD86-TotalSeq-B0200-anti-mouse
CD4-TotalSeq-B0001-anti-mouse.7	1.15050822773238e-11	-1.98111	0.882	0.882	2.18596563269153e-10	11.Neutro	CD4-TotalSeq-B0001-anti-mouse
Rat-IgG2a---Isotype-Ctrl-B0238-anti-mouse.9	1.73064090032824e-11	-0.482727	0.979	0.946	3.28821771062366e-10	11.Neutro	Rat-IgG2a---Isotype-Ctrl-B0238-anti-mouse
CD169-TotalSeq-B0440-anti-mouse.9	5.45732945793164e-08	0.178931	0.814	0.608	1.03689259700701e-06	11.Neutro	CD169-TotalSeq-B0440-anti-mouse
CD207-TotalSeq-B0437-anti-mouse-human-Langerin.3	0.00016727	-0.271127	0.987	0.964	0.00317813	11.Neutro	CD207-TotalSeq-B0437-anti-mouse-human-Langerin
NKp46-TotalSeq-B0184-anti-mouse.9	0.000278208	-1.97363	0.451	0.468	0.00528595	11.Neutro	NKp46-TotalSeq-B0184-anti-mouse
CD4-TotalSeq-B0001-anti-mouse.8	7.35894945506817e-99	4.71638	0.995	0.879	1.39820039646295e-97	12.ilc3	CD4-TotalSeq-B0001-anti-mouse
CD169-TotalSeq-B0440-anti-mouse.10	3.67394756430685e-50	1.73831	0.934	0.606	6.98050037218302e-49	12.ilc3	CD169-TotalSeq-B0440-anti-mouse
Ly6C-TotalSeq-B0013-anti-mouse.11	2.74305502332879e-48	-1.657	1	0.999	5.2118045443247e-47	12.ilc3	Ly6C-TotalSeq-B0013-anti-mouse
CD103-TotalSeq-B0201-anti-mouse.12	9.09025116908926e-29	-3.70823	0.929	0.943	1.72714772212696e-27	12.ilc3	CD103-TotalSeq-B0201-anti-mouse
MHCII-TotalSeq-B0117-anti-mouse.9	8.10840971586842e-27	0.753468	1	0.999	1.540597846015e-25	12.ilc3	MHCII-TotalSeq-B0117-anti-mouse
CD27-TotalSeq-B0191-anti-mouse-rat-human.12	2.12444019590024e-24	-1.96447	0.969	0.97	4.03643637221046e-23	12.ilc3	CD27-TotalSeq-B0191-anti-mouse-rat-human
NKp46-TotalSeq-B0184-anti-mouse.10	2.7667988752722e-23	2.03042	0.735	0.461	5.25691786301718e-22	12.ilc3	NKp46-TotalSeq-B0184-anti-mouse
SiglecH-TotalSeq-B0119-anti-mouse.9	5.71594388759821e-20	-0.84836	0.995	0.991	1.08602933864366e-18	12.ilc3	SiglecH-TotalSeq-B0119-anti-mouse
F4-80-TotalSeq-B0114-anti-mouse.11	3.2962916763825e-18	-0.500064	1	0.995	6.26295418512676e-17	12.ilc3	F4-80-TotalSeq-B0114-anti-mouse
CD64-TotalSeq-B0202-anti-mouse.10	1.91208005351039e-13	-0.512068	0.98	0.978	3.63295210166974e-12	12.ilc3	CD64-TotalSeq-B0202-anti-mouse
CD11b-TotalSeq-B0014-anti-mouse-human.11	4.02379160665015e-13	-1.14614	0.98	0.924	7.64520405263529e-12	12.ilc3	CD11b-TotalSeq-B0014-anti-mouse-human
NK1-1-TotalSeq-B0118-anti-mouse.12	6.37160312561409e-08	0.39527	0.985	0.948	1.21060459386668e-06	12.ilc3	NK1-1-TotalSeq-B0118-anti-mouse
Rat-IgG2a---Isotype-Ctrl-B0238-anti-mouse.10	7.08484182527645e-07	-0.318503	0.949	0.947	1.34611994680253e-05	12.ilc3	Rat-IgG2a---Isotype-Ctrl-B0238-anti-mouse
CD207-TotalSeq-B0437-anti-mouse-human-Langerin.4	7.3483448282061e-07	-0.342422	0.974	0.964	1.39618551735916e-05	12.ilc3	CD207-TotalSeq-B0437-anti-mouse-human-Langerin
CD8-TotalSeq-B0002-anti-mouse.10	5.11990699306342e-05	-1.32222	1	0.995	0.000972782	12.ilc3	CD8-TotalSeq-B0002-anti-mouse
Ly6G-TotalSeq-B0015-anti-mouse.4	0.00780727	-2.72129	0.719	0.636	0.148338	12.ilc3	Ly6G-TotalSeq-B0015-anti-mouse
MHCII-TotalSeq-B0117-anti-mouse.10	3.32228442984665e-66	2.41641	1	0.999	6.31234041670863e-65	13.B-cell	MHCII-TotalSeq-B0117-anti-mouse
CD80-TotalSeq-B0849-anti-mouse.9	9.58965902939296e-52	1.55199	1	0.996	1.82203521558466e-50	13.B-cell	CD80-TotalSeq-B0849-anti-mouse
CD27-TotalSeq-B0191-anti-mouse-rat-human.13	1.90439242879836e-23	-2.16545	0.931	0.971	3.61834561471689e-22	13.B-cell	CD27-TotalSeq-B0191-anti-mouse-rat-human
CD207-TotalSeq-B0437-anti-mouse-human-Langerin.5	1.98746960151715e-23	0.841626	1	0.964	3.77619224288258e-22	13.B-cell	CD207-TotalSeq-B0437-anti-mouse-human-Langerin
CD103-TotalSeq-B0201-anti-mouse.13	4.76228366086353e-11	-3.90868	0.945	0.942	9.0483389556407e-10	13.B-cell	CD103-TotalSeq-B0201-anti-mouse
Ly6G-TotalSeq-B0015-anti-mouse.5	1.05025820369094e-09	-3.10133	0.821	0.634	1.99549058701278e-08	13.B-cell	Ly6G-TotalSeq-B0015-anti-mouse
Ly6C-TotalSeq-B0013-anti-mouse.12	5.86759846110938e-07	-1.09546	1	0.999	1.11484370761078e-05	13.B-cell	Ly6C-TotalSeq-B0013-anti-mouse
CD8-TotalSeq-B0002-anti-mouse.11	9.47363331077578e-07	-1.80041	1	0.995	1.7999903290474e-05	13.B-cell	CD8-TotalSeq-B0002-anti-mouse
Rat-IgG2a---Isotype-Ctrl-B0238-anti-mouse.11	4.32989123040465e-05	0.351297	0.959	0.946	0.000822679	13.B-cell	Rat-IgG2a---Isotype-Ctrl-B0238-anti-mouse
CD11c-TotalSeq-B0106-anti-mouse.11	0.000122174	-1.50656	0.883	0.876	0.0023213	13.B-cell	CD11c-TotalSeq-B0106-anti-mouse
CD86-TotalSeq-B0200-anti-mouse.10	0.000786687	-0.100002	0.966	0.939	0.0149471	13.B-cell	CD86-TotalSeq-B0200-anti-mouse
Ly6C-TotalSeq-B0013-anti-mouse.13	1.69171247678868e-18	0.900271	1	0.999	3.21425370589849e-17	14.?	Ly6C-TotalSeq-B0013-anti-mouse
MHCII-TotalSeq-B0117-anti-mouse.11	8.73831560833895e-12	-2.98503	1	0.999	1.6602799655844e-10	14.?	MHCII-TotalSeq-B0117-anti-mouse
CD4-TotalSeq-B0001-anti-mouse.9	4.93222063707096e-09	-2.66954	0.784	0.884	9.37121921043483e-08	14.?	CD4-TotalSeq-B0001-anti-mouse
CD11b-TotalSeq-B0014-anti-mouse-human.12	7.09339172836343e-09	-3.38975	0.876	0.926	1.34774442838905e-07	14.?	CD11b-TotalSeq-B0014-anti-mouse-human
CD64-TotalSeq-B0202-anti-mouse.11	5.17288491158372e-08	0.380851	0.98	0.978	9.82848133200906e-07	14.?	CD64-TotalSeq-B0202-anti-mouse
CD169-TotalSeq-B0440-anti-mouse.11	2.82720882713922e-07	-1.6512	0.431	0.618	5.37169677156452e-06	14.?	CD169-TotalSeq-B0440-anti-mouse
CD11c-TotalSeq-B0106-anti-mouse.12	2.2951779410907e-05	-1.31123	0.784	0.878	0.000436084	14.?	CD11c-TotalSeq-B0106-anti-mouse
F4-80-TotalSeq-B0114-anti-mouse.12	3.50965738483548e-05	0.248692	0.987	0.996	0.000666835	14.?	F4-80-TotalSeq-B0114-anti-mouse
Rat-IgG2a---Isotype-Ctrl-B0238-anti-mouse.12	0.000242299	0.30477	0.954	0.947	0.00460369	14.?	Rat-IgG2a---Isotype-Ctrl-B0238-anti-mouse
CD86-TotalSeq-B0200-anti-mouse.11	0.00430623	0.576769	0.948	0.939	0.0818183	14.?	CD86-TotalSeq-B0200-anti-mouse
CD4-TotalSeq-B0001-anti-mouse.10	2.34496925921164e-25	2.79163	0.951	0.881	4.45544159250212e-24	15.ilc2	CD4-TotalSeq-B0001-anti-mouse
CD86-TotalSeq-B0200-anti-mouse.12	5.79688338296186e-13	1.46679	0.963	0.939	1.10140784276275e-11	15.ilc2	CD86-TotalSeq-B0200-anti-mouse
CD27-TotalSeq-B0191-anti-mouse-rat-human.14	4.6298473519717e-08	0.710677	1	0.97	8.79670996874624e-07	15.ilc2	CD27-TotalSeq-B0191-anti-mouse-rat-human
CD8-TotalSeq-B0002-anti-mouse.12	2.33508122148913e-06	-1.98909	0.988	0.995	4.43665432082934e-05	15.ilc2	CD8-TotalSeq-B0002-anti-mouse
CD11c-TotalSeq-B0106-anti-mouse.13	0.000128494	-2.20551	0.901	0.876	0.00244139	15.ilc2	CD11c-TotalSeq-B0106-anti-mouse
Ly6C-TotalSeq-B0013-anti-mouse.14	0.000402954	-0.936576	1	0.999	0.00765612	15.ilc2	Ly6C-TotalSeq-B0013-anti-mouse
CD103-TotalSeq-B0201-anti-mouse.14	0.000539294	-1.10487	0.926	0.942	0.0102466	15.ilc2	CD103-TotalSeq-B0201-anti-mouse
F4-80-TotalSeq-B0114-anti-mouse.13	0.00109814	-0.331307	1	0.995	0.0208647	15.ilc2	F4-80-TotalSeq-B0114-anti-mouse
CD11b-TotalSeq-B0014-anti-mouse-human.13	0.00531465	-2.91603	0.951	0.925	0.100978	15.ilc2	CD11b-TotalSeq-B0014-anti-mouse-human
CD11b-TotalSeq-B0014-anti-mouse-human.14	2.19977481460575e-11	0.666805	1	0.925	4.17957214775092e-10	16.Baso	CD11b-TotalSeq-B0014-anti-mouse-human
CD27-TotalSeq-B0191-anti-mouse-rat-human.15	2.25417913550203e-10	-2.74966	0.923	0.97	4.28294035745386e-09	16.Baso	CD27-TotalSeq-B0191-anti-mouse-rat-human
CD86-TotalSeq-B0200-anti-mouse.13	2.25686786094296e-07	0.529789	1	0.939	4.28804893579163e-06	16.Baso	CD86-TotalSeq-B0200-anti-mouse
CD169-TotalSeq-B0440-anti-mouse.12	1.51487648487467e-05	1.37817	0.821	0.613	0.000287827	16.Baso	CD169-TotalSeq-B0440-anti-mouse
Ly6C-TotalSeq-B0013-anti-mouse.15	0.000763934	-1.28125	1	0.999	0.0145148	16.Baso	Ly6C-TotalSeq-B0013-anti-mouse
CD8-TotalSeq-B0002-anti-mouse.13	0.0028555	-1.36645	0.974	0.995	0.0542545	16.Baso	CD8-TotalSeq-B0002-anti-mouse
SiglecH-TotalSeq-B0119-anti-mouse.10	1.77834663547139e-16	2.14364	1	0.991	3.37885860739564e-15	17.pDC(iMOS?)	SiglecH-TotalSeq-B0119-anti-mouse
CD11b-TotalSeq-B0014-anti-mouse-human.15	7.68771025942859e-15	2.52012	1	0.925	1.46066494929143e-13	17.pDC(iMOS?)	CD11b-TotalSeq-B0014-anti-mouse-human
CD27-TotalSeq-B0191-anti-mouse-rat-human.16	9.85958623947663e-13	-3.76592	0.962	0.97	1.87332138550056e-11	17.pDC(iMOS?)	CD27-TotalSeq-B0191-anti-mouse-rat-human
CD4-TotalSeq-B0001-anti-mouse.11	5.3022841997711e-12	2.12791	1	0.881	1.00743399795651e-10	17.pDC(iMOS?)	CD4-TotalSeq-B0001-anti-mouse
NK1-1-TotalSeq-B0118-anti-mouse.13	1.33570553549177e-10	-2.39722	1	0.949	2.53784051743436e-09	17.pDC(iMOS?)	NK1-1-TotalSeq-B0118-anti-mouse
CD11c-TotalSeq-B0106-anti-mouse.14	1.38729661254716e-08	0.717762	1	0.876	2.6358635638396e-07	17.pDC(iMOS?)	CD11c-TotalSeq-B0106-anti-mouse
Ly6G-TotalSeq-B0015-anti-mouse.6	1.4744074334763e-08	3.02545	0.962	0.637	2.80137412360497e-07	17.pDC(iMOS?)	Ly6G-TotalSeq-B0015-anti-mouse
Ly6C-TotalSeq-B0013-anti-mouse.16	1.47635312177174e-07	0.883267	1	0.999	2.80507093136631e-06	17.pDC(iMOS?)	Ly6C-TotalSeq-B0013-anti-mouse
F4-80-TotalSeq-B0114-anti-mouse.14	1.85560113305757e-07	-0.903581	1	0.995	3.52564215280938e-06	17.pDC(iMOS?)	F4-80-TotalSeq-B0114-anti-mouse
Rat-IgG2a---Isotype-Ctrl-B0238-anti-mouse.13	3.09535934751757e-07	-0.900068	0.962	0.947	5.88118276028338e-06	17.pDC(iMOS?)	Rat-IgG2a---Isotype-Ctrl-B0238-anti-mouse
CD64-TotalSeq-B0202-anti-mouse.12	2.41835627962873e-06	-0.778702	1	0.978	4.59487693129459e-05	17.pDC(iMOS?)	CD64-TotalSeq-B0202-anti-mouse
MHCII-TotalSeq-B0117-anti-mouse.12	3.7536659421124e-05	-0.751143	1	0.999	0.000713197	17.pDC(iMOS?)	MHCII-TotalSeq-B0117-anti-mouse
CD103-TotalSeq-B0201-anti-mouse.15	5.73808190516295e-05	-3.84241	1	0.942	0.00109024	17.pDC(iMOS?)	CD103-TotalSeq-B0201-anti-mouse
CD207-TotalSeq-B0437-anti-mouse-human-Langerin.6	0.000602178	-0.484789	1	0.964	0.0114414	17.pDC(iMOS?)	CD207-TotalSeq-B0437-anti-mouse-human-Langerin
CD86-TotalSeq-B0200-anti-mouse.14	0.000763602	-1.93819	0.962	0.939	0.0145084	17.pDC(iMOS?)	CD86-TotalSeq-B0200-anti-mouse
CD80-TotalSeq-B0849-anti-mouse.10	3.32646398820226e-05	1.52463	1	0.996	0.000632028	18.Bcell?	CD80-TotalSeq-B0849-anti-mouse
CD207-TotalSeq-B0437-anti-mouse-human-Langerin.7	0.00116766	1.40402	1	0.965	0.0221855	18.Bcell?	CD207-TotalSeq-B0437-anti-mouse-human-Langerin
Rat-IgG2a---Isotype-Ctrl-B0238-anti-mouse.14	0.00609139	1.31661	1	0.947	0.115736	18.Bcell?	Rat-IgG2a---Isotype-Ctrl-B0238-anti-mouse
CD169-TotalSeq-B0440-anti-mouse.13	0.00294053	4.50415	1	0.614	0.05587	19.Macro	CD169-TotalSeq-B0440-anti-mouse
SiglecH-TotalSeq-B0119-anti-mouse.11	0.00578765	-1.00515	0.667	0.991	0.109965	19.Macro	SiglecH-TotalSeq-B0119-anti-mouse
Rat-IgG2a---Isotype-Ctrl-B0238-anti-mouse.15	0.00914179	-0.173086	0.667	0.947	0.173694	19.Macro	Rat-IgG2a---Isotype-Ctrl-B0238-anti-mouse
CD4-TotalSeq-B0001-anti-mouse.12	0.00954198	1.169	1	0.882	0.181298	19.Macro	CD4-TotalSeq-B0001-anti-mouse

## Sheet: rna_markers_WT_ECTV_d1-0.2
	p_val	avg_log2FC	pct.1	pct.2	p_val_adj	cluster	gene
Themis	0	2.91181	0.935	0.234	0	0.icl2	Themis
Cd44	0	-4.67169	0.055	0.617	0	0.icl2	Cd44
Lef1	0	2.09044	0.873	0.331	0	0.icl2	Lef1
Ahnak	0	-3.29918	0.148	0.686	0	0.icl2	Ahnak
Cd3d	0	1.40935	0.972	0.496	0	0.icl2	Cd3d
Cd3g	0	1.03832	0.99	0.519	0	0.icl2	Cd3g
Ms4a6b	0	1.86062	0.939	0.484	0	0.icl2	Ms4a6b
Ms4a4b	0	1.07618	0.975	0.523	0	0.icl2	Ms4a4b
Gm8369	0	1.78028	0.677	0.236	0	0.icl2	Gm8369
Cd3e	0	1.2622	0.879	0.44	0	0.icl2	Cd3e
Lck	0	1.52644	0.828	0.402	0	0.icl2	Lck
S1pr1	0	1.92279	0.735	0.314	0	0.icl2	S1pr1
Smc4	0	1.96178	0.894	0.482	0	0.icl2	Smc4
Fam169b	0	1.93394	0.659	0.25	0	0.icl2	Fam169b
Acp5	0	2.1761	0.614	0.211	0	0.icl2	Acp5
Rhoh	0	1.7776	0.818	0.459	0	0.icl2	Rhoh
Grap2	0	1.27709	0.911	0.597	0	0.icl2	Grap2
Ablim1	0	1.31602	0.915	0.624	0	0.icl2	Ablim1
Skap1	0	1.09471	0.99	0.722	0	0.icl2	Skap1
Foxp1	0	1.13829	0.974	0.814	0	0.icl2	Foxp1
Tmsb10	0	0.973125	0.996	0.919	0	0.icl2	Tmsb10
Anxa2	5.73689265325022e-319	-3.23522	0.112	0.55	9.49455734112911e-315	0.icl2	Anxa2
Fcer1g	7.3468549667885e-319	-6.48669	0.032	0.439	1.2159044970035e-314	0.icl2	Fcer1g
Dgka	1.33661258992628e-317	1.71886	0.714	0.345	2.212093836328e-313	0.icl2	Dgka
Bcl11b	1.53125429650938e-316	1.39312	0.828	0.429	2.53422586072303e-312	0.icl2	Bcl11b
Rps3a1	6.71564511448502e-312	0.587756	0.997	0.931	1.11143926644727e-307	0.icl2	Rps3a1
Prkcq	1.11882086320898e-307	1.34239	0.851	0.519	1.85164852861085e-303	0.icl2	Prkcq
Ccr2	2.99605522273884e-306	-6.70674	0.008	0.4	4.95847139363278e-302	0.icl2	Ccr2
Pitpnc1	2.7259740181531e-304	1.09923	0.934	0.683	4.51148700004338e-300	0.icl2	Pitpnc1
Scml4	1.44107778818072e-301	1.56823	0.752	0.405	2.3849837394391e-297	0.icl2	Scml4
S100a6	4.62179135623071e-295	-3.28956	0.334	0.676	7.64906469456182e-291	0.icl2	S100a6
Klrk1	3.72086844052697e-293	-5.26029	0.018	0.404	6.15803726907214e-289	0.icl2	Klrk1
Tyrobp	8.13638752676536e-293	-6.5539	0.045	0.429	1.34657213567967e-288	0.icl2	Tyrobp
Prkch	2.76306054588266e-290	1.06231	0.917	0.563	4.5728652034358e-286	0.icl2	Prkch
S100a4	8.54129124050072e-290	-4.88224	0.085	0.469	1.41358370030287e-285	0.icl2	S100a4
Osbpl3	6.69744403214312e-279	-4.96484	0.021	0.394	1.10842698731969e-274	0.icl2	Osbpl3
Il18r1	2.39396840213008e-276	-2.67291	0.192	0.576	3.96201770552528e-272	0.icl2	Il18r1
Tcf7	6.40021111965589e-276	1.18746	0.86	0.543	1.05923494030305e-271	0.icl2	Tcf7
Plek	1.08321471367245e-271	-6.17732	0.017	0.378	1.7927203511279e-267	0.icl2	Plek
Rpl35a	3.49338492885588e-269	0.531874	0.996	0.934	5.78155205725648e-265	0.icl2	Rpl35a
Arl4c	2.50974363918136e-267	1.37966	0.771	0.451	4.15362572284515e-263	0.icl2	Arl4c
Rps15a	2.06464765001946e-264	0.553669	0.996	0.92	3.4169918607822e-260	0.icl2	Rps15a
Ccr9	4.25721637641803e-264	1.89638	0.466	0.12	7.04569310297184e-260	0.icl2	Ccr9
Tmem176b	1.2551561679068e-263	-4.93681	0.032	0.391	2.07728345788576e-259	0.icl2	Tmem176b
Tmem176a	5.61327455631957e-263	-5.18694	0.028	0.384	9.28996939070888e-259	0.icl2	Tmem176a
Rps16	1.16533547868528e-262	0.524172	0.997	0.933	1.92863021722415e-258	0.icl2	Rps16
Rps27	1.60253145730244e-262	0.538295	0.997	0.944	2.65218956183554e-258	0.icl2	Rps27
Cd27	2.42760472631594e-259	1.63024	0.63	0.277	4.01768582205289e-255	0.icl2	Cd27
Ift80	6.72786770043603e-256	1.99874	0.511	0.17	1.11346210442216e-251	0.icl2	Ift80
Capg	3.31104294535391e-255	-4.1068	0.06	0.421	5.47977607456073e-251	0.icl2	Capg
Rps24	1.00444054616015e-250	0.5145	0.998	0.942	1.66234910389505e-246	0.icl2	Rps24
Aff3	2.88267905990019e-249	1.02785	0.859	0.482	4.77083384413481e-245	0.icl2	Aff3
Myo1e	6.07769216668535e-247	-4.01425	0.047	0.402	1.00585805358643e-242	0.icl2	Myo1e
Arhgap15	6.21069677223656e-244	0.716436	0.994	0.903	1.02787031580515e-239	0.icl2	Arhgap15
Lyn	1.16776631505242e-238	-4.04967	0.057	0.403	1.93265325141176e-234	0.icl2	Lyn
Niban1	4.71213341882444e-232	-2.72305	0.137	0.498	7.79858080815444e-228	0.icl2	Niban1
Clnk	4.78970970954245e-232	-7.16323	0.004	0.317	7.92696956929275e-228	0.icl2	Clnk
Gimap6	1.55708129406487e-228	1.10228	0.88	0.564	2.57696954167736e-224	0.icl2	Gimap6
Rpl8	3.92822719284164e-227	0.525775	0.998	0.925	6.50121600415291e-223	0.icl2	Rpl8
Saraf	1.17452936210239e-223	1.05051	0.879	0.683	1.94384609427946e-219	0.icl2	Saraf
Id3	2.10977726036363e-223	1.81762	0.54	0.214	3.49168136590181e-219	0.icl2	Id3
Pik3ap1	3.47766515000815e-222	-4.75958	0.024	0.341	5.75553582326348e-218	0.icl2	Pik3ap1
Id2	1.0889290321173e-216	-1.92095	0.254	0.607	1.80217754815413e-212	0.icl2	Id2
Dennd4a	1.88391809173495e-215	-1.76984	0.529	0.79	3.11788444182134e-211	0.icl2	Dennd4a
Il18rap	3.02951248364841e-212	-3.62202	0.048	0.368	5.01384316043812e-208	0.icl2	Il18rap
Ppm1h	1.05768006522352e-208	1.08207	0.821	0.582	1.75046050794493e-204	0.icl2	Ppm1h
Dock5	8.14593059791132e-206	-3.88488	0.023	0.323	1.34815151395432e-201	0.icl2	Dock5
Zeb2	1.33898320068115e-204	-5.49595	0.027	0.321	2.2160171971273e-200	0.icl2	Zeb2
Tmem108	9.18734147313601e-203	2.49623	0.341	0.082	1.52050501380401e-198	0.icl2	Tmem108
St8sia1	1.43983982522858e-201	1.98732	0.396	0.116	2.3829349107533e-197	0.icl2	St8sia1
Bhlhe40	1.40921600043283e-198	-4.51814	0.022	0.312	2.33225248071634e-194	0.icl2	Bhlhe40
Rpl12	1.35934315777014e-196	0.543498	0.995	0.895	2.24971292610958e-192	0.icl2	Rpl12
Sell	1.19117008014379e-195	1.02508	0.752	0.423	1.97138648263798e-191	0.icl2	Sell
Vim	4.09402393028155e-193	-1.74771	0.386	0.679	6.77560960461597e-189	0.icl2	Vim
Dennd5a	4.13913454716499e-192	-4.04112	0.029	0.317	6.85026767555805e-188	0.icl2	Dennd5a
Anxa1	5.73101666563462e-192	-4.78732	0.013	0.289	9.4848325816253e-188	0.icl2	Anxa1
Lrrk1	2.18912284136566e-191	-5.52603	0.013	0.286	3.62299830246016e-187	0.icl2	Lrrk1
Syk	4.49729455975806e-191	-7.1373	0.006	0.273	7.44302249639959e-187	0.icl2	Syk
Pim1	2.37676733182828e-189	-2.27648	0.251	0.578	3.9335499341758e-185	0.icl2	Pim1
Litaf	1.09384329960484e-188	-4.52742	0.032	0.315	1.81031066084601e-184	0.icl2	Litaf
Rps3	3.91883615097535e-188	0.467359	0.996	0.921	6.4856738298642e-184	0.icl2	Rps3
Actn1	2.99185027193923e-187	1.6144	0.467	0.179	4.95151220005943e-183	0.icl2	Actn1
Bcl2a1b	1.30494361245693e-186	-5.68443	0.011	0.278	2.15968167861622e-182	0.icl2	Bcl2a1b
Dapl1	4.31806598213519e-186	2.8243	0.318	0.076	7.14639920043374e-182	0.icl2	Dapl1
Rps19	4.5384781377624e-184	0.490753	0.998	0.928	7.51118131799677e-180	0.icl2	Rps19
Pde3b	4.07587019873021e-183	1.01703	0.802	0.546	6.7455651788985e-179	0.icl2	Pde3b
Foxo1	8.77150476124404e-183	1.22095	0.704	0.46	1.45168403798589e-178	0.icl2	Foxo1
Rps7	2.92754896450109e-180	0.465227	0.996	0.922	4.84509353624931e-176	0.icl2	Rps7
Igfbp4	5.88954020838578e-180	2.6732	0.275	0.053	9.74718904487846e-176	0.icl2	Igfbp4
Lgals1	4.0078051450837e-179	-1.99847	0.388	0.65	6.63291751511352e-175	0.icl2	Lgals1
Chst11	5.54668637867466e-179	-2.56402	0.104	0.414	9.17976595670656e-175	0.icl2	Chst11
Samsn1	3.49313796143427e-178	-2.00518	0.296	0.606	5.78114332617372e-174	0.icl2	Samsn1
Gimap3	4.57079849199984e-178	1.07761	0.728	0.441	7.56467150425974e-174	0.icl2	Gimap3
Rasgef1b	5.49313777453333e-178	-3.50357	0.043	0.324	9.09114301685267e-174	0.icl2	Rasgef1b
Il6st	3.58645477665535e-176	1.44193	0.5	0.219	5.9355826553646e-172	0.icl2	Il6st
Cd74	5.16097365911873e-176	-6.09966	0.087	0.369	8.5414114058415e-172	0.icl2	Cd74
Il23r	9.7386782912187e-174	-8.21267	0.004	0.248	1.6117512571967e-169	0.icl2	Il23r
Dpp4	1.13211031257462e-173	1.15528	0.531	0.239	1.873642567311e-169	0.icl2	Dpp4
Thy1	8.95566426768083e-173	1.10402	0.716	0.437	1.48216243630118e-168	0.icl2	Thy1
Fam78a	3.42897493850368e-172	2.00741	0.409	0.157	5.67495352322359e-168	0.icl2	Fam78a
Atf3	6.23288414793717e-172	-3.32114	0.064	0.346	1.0315423264836e-167	0.icl2	Atf3
Rps18	9.82764260046469e-172	0.459047	0.997	0.918	1.62647485037691e-167	0.icl2	Rps18
Rpl18	1.53292407634652e-168	0.450664	0.997	0.922	2.53698934635349e-164	0.icl2	Rpl18
Rps29	6.79817731320426e-168	0.386239	0.999	0.962	1.12509834533531e-163	0.icl2	Rps29
Nfkbia	1.20345522515796e-167	-1.62543	0.517	0.761	1.99171839763643e-163	0.icl2	Nfkbia
Ifi27l2a	3.94886757679612e-163	0.918895	0.582	0.285	6.53537583959758e-159	0.icl2	Ifi27l2a
Pxdc1	2.57114664910339e-161	-7.42773	0.003	0.231	4.2552477042661e-157	0.icl2	Pxdc1
Jaml	6.54673564794289e-161	-2.78954	0.088	0.365	1.08348474973455e-156	0.icl2	Jaml
Sh3kbp1	9.65882005639643e-161	0.856434	0.856	0.713	1.59853471933361e-156	0.icl2	Sh3kbp1
Nsg2	6.52517860078629e-160	1.80292	0.412	0.156	1.07991705843013e-155	0.icl2	Nsg2
St3gal6	7.42318154530378e-160	-1.96418	0.166	0.47	1.22853654574778e-155	0.icl2	St3gal6
Irf8	3.77802823971252e-159	-5.38491	0.028	0.272	6.25263673672422e-155	0.icl2	Irf8
Rpl9	3.85094942552358e-159	0.421663	0.996	0.921	6.37332129924153e-155	0.icl2	Rpl9
Limd2	4.80848968876764e-159	0.866809	0.832	0.661	7.95805043491044e-155	0.icl2	Limd2
Rps20	6.76904966125455e-159	0.454649	0.998	0.919	1.12027771893763e-154	0.icl2	Rps20
Ptms	3.01351699635647e-157	-3.06979	0.063	0.329	4.98737062896996e-153	0.icl2	Ptms
Irak2	3.22935640334919e-157	-2.20844	0.124	0.418	5.3445848475429e-153	0.icl2	Irak2
S100a11	1.0604380703332e-156	-1.82858	0.601	0.773	1.75502500640144e-152	0.icl2	S100a11
Gng2	1.51462606203464e-156	-1.69889	0.162	0.476	2.50670613266732e-152	0.icl2	Gng2
Zbtb16	1.53648790083017e-156	-5.26207	0.013	0.244	2.54288747587393e-152	0.icl2	Zbtb16
Ripor2	1.58422236240113e-156	0.66114	0.94	0.766	2.62188800977387e-152	0.icl2	Ripor2
Cd247	2.41637641501624e-156	0.67429	0.844	0.562	3.99910296685187e-152	0.icl2	Cd247
Marchf3	3.82220042661541e-156	-2.90128	0.106	0.379	6.3257417060485e-152	0.icl2	Marchf3
Ckb	2.85525555254049e-155	-5.01765	0.011	0.24	4.72544793945451e-151	0.icl2	Ckb
Cd2	6.73341110192592e-155	0.899837	0.714	0.424	1.11437953736874e-150	0.icl2	Cd2
Nebl	2.83093443747596e-153	-5.09717	0.013	0.242	4.68519649402272e-149	0.icl2	Nebl
Pced1b	4.72613120981555e-152	1.26785	0.604	0.361	7.82174715224473e-148	0.icl2	Pced1b
Itgb1	4.38302562878582e-151	-2.0383	0.187	0.481	7.25390741564052e-147	0.icl2	Itgb1
Serinc3	6.74553706897142e-151	-1.11633	0.503	0.754	1.11638638491477e-146	0.icl2	Serinc3
Plcg2	2.85412030872881e-150	-4.21515	0.017	0.246	4.72356911094618e-146	0.icl2	Plcg2
Lgals3	4.48267777640357e-150	-6.16649	0.009	0.229	7.41883171994791e-146	0.icl2	Lgals3
Rpl35	1.10506409917811e-148	0.452351	0.995	0.903	1.82888108413978e-144	0.icl2	Rpl35
Shisa5	2.93375960937135e-148	0.655136	0.939	0.781	4.85537215350959e-144	0.icl2	Shisa5
Rora	5.14260184119497e-147	-2.76846	0.174	0.438	8.51100604717768e-143	0.icl2	Rora
Hmgb2	2.56164816535902e-145	-1.18119	0.563	0.786	4.23952771366918e-141	0.icl2	Hmgb2
Il1r1	8.0026937316075e-145	-6.58547	0.006	0.218	1.32444581258104e-140	0.icl2	Il1r1
St6gal1	4.54443398527525e-144	1.14914	0.619	0.381	7.52103824563055e-140	0.icl2	St6gal1
Blk	1.85723342858792e-143	-4.75732	0.024	0.246	3.07372132431301e-139	0.icl2	Blk
Lrmda	2.24734196405936e-143	-4.5148	0.017	0.237	3.71935095051823e-139	0.icl2	Lrmda
Rplp2	3.16637052956626e-143	0.388466	0.997	0.929	5.24034322643216e-139	0.icl2	Rplp2
Trat1	3.17608760129165e-143	2.23955	0.296	0.086	5.25642498013769e-139	0.icl2	Trat1
Cd8b1	1.07697984512343e-142	2.67506	0.251	0.058	1.78240164367927e-138	0.icl2	Cd8b1
Ppic	2.01413950196862e-142	3.04714	0.221	0.043	3.33340087575807e-138	0.icl2	Ppic
Rps8	6.24252293021592e-142	0.401463	0.996	0.937	1.03313754495074e-137	0.icl2	Rps8
Rpl7	9.95105173613357e-142	0.440338	0.995	0.905	1.64689906233011e-137	0.icl2	Rpl7
Gimap4	2.83686928340184e-141	0.846518	0.692	0.387	4.69501866403005e-137	0.icl2	Gimap4
Fgl2	5.34846533364083e-141	-4.75972	0.013	0.227	8.85171012717557e-137	0.icl2	Fgl2
Rpl19	5.4530493480721e-141	0.370883	0.998	0.947	9.02479667105933e-137	0.icl2	Rpl19
Rpl15	6.70481927584778e-141	0.446915	0.995	0.892	1.10964759015281e-136	0.icl2	Rpl15
Rps28	8.11435076677437e-141	0.397253	0.997	0.928	1.34292505190116e-136	0.icl2	Rps28
Napsa	8.71661565706568e-139	-5.34569	0.011	0.22	1.44259989124437e-134	0.icl2	Napsa
Gas7	1.09537482456726e-138	-5.81484	0.004	0.207	1.81284533465881e-134	0.icl2	Gas7
Cd83	1.86122647447175e-138	-4.48669	0.022	0.239	3.08032981525075e-134	0.icl2	Cd83
Serpinb1a	2.82870381700027e-138	-4.7236	0.014	0.225	4.68150481713545e-134	0.icl2	Serpinb1a
Ikzf1	5.75604359293515e-138	0.656477	0.919	0.786	9.52625214630768e-134	0.icl2	Ikzf1
Il21r	1.12911398712239e-137	1.27925	0.481	0.234	1.86868364868755e-133	0.icl2	Il21r
Xcl1	1.4282414265714e-137	-4.39183	0.04	0.266	2.36373956097567e-133	0.icl2	Xcl1
Ncr1	1.50283109552551e-137	-7.70838	0.004	0.203	2.48718546309473e-133	0.icl2	Ncr1
Lat	6.2483117944871e-137	1.10814	0.617	0.376	1.03409560198762e-132	0.icl2	Lat
Kctd12	6.25828764536226e-137	-3.03836	0.058	0.299	1.03574660530745e-132	0.icl2	Kctd12
Dennd2d	1.23455736357575e-136	1.47993	0.448	0.217	2.04319243671787e-132	0.icl2	Dennd2d
Rpl30	2.24674909846768e-136	0.389836	0.998	0.932	3.71836975796401e-132	0.icl2	Rpl30
Sox5	2.97153700636081e-135	1.93586	0.29	0.083	4.91789374552715e-131	0.icl2	Sox5
Itk	3.48569626759184e-135	0.663014	0.862	0.598	5.76882732286449e-131	0.icl2	Itk
Mef2c	8.75260358143841e-135	-5.19759	0.013	0.218	1.44855589272806e-130	0.icl2	Mef2c
Galnt10	9.06305606321551e-135	1.41061	0.483	0.253	1.49993577846217e-130	0.icl2	Galnt10
Klrb1f	8.83318773196357e-134	-5.70036	0.006	0.204	1.46189256963997e-129	0.icl2	Klrb1f
Gab2	6.7572585181792e-133	-5.28427	0.011	0.212	1.11832628475866e-128	0.icl2	Gab2
Nfil3	2.13777354518625e-132	-2.93129	0.042	0.27	3.53801521728325e-128	0.icl2	Nfil3
Dusp5	4.77202048280376e-132	-2.07863	0.121	0.384	7.89769389904022e-128	0.icl2	Dusp5
Ell2	1.12697641289055e-131	-3.02448	0.053	0.284	1.86514596333386e-127	0.icl2	Ell2
Bcl2a1d	2.81267927283825e-131	-5.70742	0.007	0.203	4.65498419654731e-127	0.icl2	Bcl2a1d
Ccr5	3.85951403452844e-131	-4.18104	0.018	0.225	6.38749572714457e-127	0.icl2	Ccr5
Adam12	4.19619644166321e-131	-7.5426	0.002	0.192	6.94470511095261e-127	0.icl2	Adam12
Hspe1	7.2308498808983e-131	0.646539	0.921	0.788	1.19670565528867e-126	0.icl2	Hspe1
Pde7a	1.75875376595759e-130	0.805072	0.831	0.654	2.91073748265981e-126	0.icl2	Pde7a
Cd5	2.30192502567913e-130	1.77267	0.344	0.129	3.80968591749897e-126	0.icl2	Cd5
Il2ra	2.37006882711508e-130	-3.42568	0.028	0.241	3.92246390887546e-126	0.icl2	Il2ra
Gpr183	7.37808707260045e-130	-1.37692	0.222	0.505	1.22107341051537e-125	0.icl2	Gpr183
Peli1	1.25609632317749e-129	0.770974	0.826	0.642	2.07883941485875e-125	0.icl2	Peli1
Tdrp	1.72078076266221e-129	2.79132	0.224	0.051	2.84789216220595e-125	0.icl2	Tdrp
Rpl11	2.29808385614865e-128	0.372783	0.997	0.929	3.80332878192601e-124	0.icl2	Rpl11
Atf6	7.9314528539876e-128	-1.72807	0.151	0.422	1.31265544733495e-123	0.icl2	Atf6
Gnaq	5.21858613152359e-127	-2.38217	0.11	0.36	8.63676004767154e-123	0.icl2	Gnaq
H2-Eb1	1.1869387360474e-126	-5.94113	0.041	0.251	1.96438360815845e-122	0.icl2	H2-Eb1
Ifi30	1.21511977032551e-126	-3.86403	0.041	0.257	2.01102321988872e-122	0.icl2	Ifi30
Coro1a	1.54035091255342e-126	0.498107	0.972	0.882	2.54928076027591e-122	0.icl2	Coro1a
Phactr2	1.82670524168743e-126	-3.3288	0.026	0.235	3.0231971749927e-122	0.icl2	Phactr2
Prr13	1.87493032598524e-126	-1.31347	0.255	0.55	3.10300968950558e-122	0.icl2	Prr13
Klre1	3.07157198963362e-126	-6.38341	0.006	0.195	5.08345164284364e-122	0.icl2	Klre1
Klrb1c	4.72739953005228e-126	-7.00919	0.003	0.188	7.82384622223653e-122	0.icl2	Klrb1c
Rplp1	9.22102575487982e-126	0.368519	0.999	0.944	1.52607976243261e-121	0.icl2	Rplp1
Nfkb1	1.62377376454864e-125	-1.44533	0.484	0.716	2.687345580328e-121	0.icl2	Nfkb1
Rack1	4.87323305420733e-125	0.421971	0.995	0.9	8.06520070471313e-121	0.icl2	Rack1
Tgfbr2	6.61696002689892e-125	0.889508	0.742	0.574	1.09510688445177e-120	0.icl2	Tgfbr2
Tcf12	1.18682800241917e-124	0.742625	0.846	0.698	1.96420034400372e-120	0.icl2	Tcf12
Pecam1	3.88678046943048e-124	1.18733	0.547	0.331	6.43262167690744e-120	0.icl2	Pecam1
Utrn	2.02927238632655e-123	0.660104	0.866	0.719	3.35844579937044e-119	0.icl2	Utrn
Rpl21	2.34970325060281e-122	0.393148	0.997	0.919	3.88875887974765e-118	0.icl2	Rpl21
Rps14	2.93659163342026e-122	0.351436	0.996	0.932	4.86005915331052e-118	0.icl2	Rps14
Mdfic	1.27660984463844e-121	-2.46407	0.076	0.308	2.11278929287663e-117	0.icl2	Mdfic
Lmo4	1.43992749314776e-121	-2.16518	0.129	0.379	2.38308000115955e-117	0.icl2	Lmo4
Ern1	3.47356936831095e-121	-2.42212	0.133	0.38	5.74875730455461e-117	0.icl2	Ern1
Plp2	3.88674619849568e-121	-2.77046	0.035	0.245	6.43256495851035e-117	0.icl2	Plp2
Rps10	6.26358397136183e-121	0.470319	0.984	0.874	1.03662314726038e-116	0.icl2	Rps10
H2-Ab1	7.75675772718243e-120	-5.4063	0.059	0.269	1.28374340384869e-115	0.icl2	H2-Ab1
Ptprj	1.42182904206916e-119	-3.0751	0.063	0.28	2.35312706462447e-115	0.icl2	Ptprj
Ccr6	2.10425271297473e-119	-10.5071	0	0.173	3.48253823997317e-115	0.icl2	Ccr6
Cmah	6.24896039468485e-119	1.13744	0.48	0.242	1.03420294532034e-114	0.icl2	Cmah
Ssbp2	1.7855259411138e-118	1.35248	0.526	0.311	2.95504543254333e-114	0.icl2	Ssbp2
Plekhm3	1.88341944197711e-118	-3.39643	0.035	0.238	3.11705917647211e-114	0.icl2	Plekhm3
Ccnd3	2.97305100652763e-118	0.685912	0.852	0.696	4.92039941580323e-114	0.icl2	Ccnd3
Ifrd1	4.38222924363906e-118	-1.29914	0.528	0.732	7.25258939822264e-114	0.icl2	Ifrd1
Abi3bp	1.37514751867347e-117	-7.2405	0.003	0.177	2.27586914340459e-113	0.icl2	Abi3bp
Cd6	2.08536222531256e-117	1.79921	0.316	0.117	3.45127448289229e-113	0.icl2	Cd6
Slamf7	2.42197357487418e-117	-3.02335	0.044	0.251	4.00836626641676e-113	0.icl2	Slamf7
Odc1	6.11206472925744e-117	-2.15094	0.214	0.47	1.01154671269211e-112	0.icl2	Odc1
Entrep3	7.41078575109944e-117	1.2378	0.515	0.308	1.22648504180696e-112	0.icl2	Entrep3
Maf	1.12401501450337e-116	-2.23607	0.117	0.35	1.86024484900308e-112	0.icl2	Maf
Nbea	3.41386491576991e-116	-3.04547	0.026	0.221	5.6499464355992e-112	0.icl2	Nbea
Plcb4	7.21374694888244e-116	-2.53114	0.069	0.289	1.19387512004004e-111	0.icl2	Plcb4
Rpl10a	8.07896791514249e-116	0.401183	0.995	0.899	1.33706918995608e-111	0.icl2	Rpl10a
Sdc4	1.16353845267186e-115	-5.43021	0.006	0.182	1.92565613917193e-111	0.icl2	Sdc4
Hip1	1.42028665768332e-115	-3.15333	0.03	0.227	2.3505744184659e-111	0.icl2	Hip1
Abtb2	2.71613640501502e-115	0.934549	0.55	0.315	4.49520575029986e-111	0.icl2	Abtb2
Tmem163	5.49501578302161e-115	-5.81249	0.006	0.18	9.09425112090077e-111	0.icl2	Tmem163
Plxnc1	8.58667928262668e-115	-3.09817	0.061	0.276	1.42109542127471e-110	0.icl2	Plxnc1
Tpd52	9.83623810765465e-115	-2.99381	0.079	0.303	1.62789740681684e-110	0.icl2	Tpd52
Nav2	1.38708791061549e-114	-2.85909	0.037	0.239	2.29563049206863e-110	0.icl2	Nav2
Tpt1	1.44346433739711e-114	0.340452	0.998	0.956	2.38893347839221e-110	0.icl2	Tpt1
Antxr2	1.82734792636931e-114	-2.6382	0.133	0.377	3.02426081814121e-110	0.icl2	Antxr2
Pag1	1.17100145102951e-113	0.76335	0.755	0.583	1.93800740145384e-109	0.icl2	Pag1
Il2rb	1.31066832502287e-113	-1.81751	0.253	0.483	2.16915607791285e-109	0.icl2	Il2rb
Gadd45b	3.48827271024465e-113	-2.18539	0.175	0.421	5.7730913354549e-109	0.icl2	Gadd45b
Spi1	2.33287383755416e-112	-6.32464	0.005	0.174	3.86090620115214e-108	0.icl2	Spi1
Hspa5	6.93649631264688e-112	-0.979162	0.676	0.814	1.14799013974306e-107	0.icl2	Hspa5
Rps13	1.37882457351066e-111	0.358073	0.997	0.923	2.28195466916013e-107	0.icl2	Rps13
H2-Aa	1.46802056966273e-111	-5.8566	0.045	0.237	2.42957404279183e-107	0.icl2	H2-Aa
Ccdc117	5.06316274556853e-111	1.28726	0.543	0.349	8.37953434391592e-107	0.icl2	Ccdc117
Satb1	1.10804964250345e-110	0.510392	0.782	0.545	1.83382215834321e-106	0.icl2	Satb1
Rpl5	1.13392816942175e-110	0.420579	0.991	0.891	1.87665112039299e-106	0.icl2	Rpl5
Klrc2	1.43595332200877e-110	-5.08483	0.009	0.18	2.37650274792451e-106	0.icl2	Klrc2
Gcnt2	2.73937962607076e-110	-5.05186	0.009	0.179	4.53367328114711e-106	0.icl2	Gcnt2
Rps23	3.50948670267393e-110	0.341702	0.998	0.936	5.80820049292535e-106	0.icl2	Rps23
Mmp25	9.11771022012303e-110	-6.60053	0.002	0.165	1.50898104143036e-105	0.icl2	Mmp25
Rpl37	1.16096815578202e-109	0.340763	0.998	0.934	1.92140229781924e-105	0.icl2	Rpl37
Samd3	1.40331750987746e-109	-3.9315	0.019	0.198	2.32249047884719e-105	0.icl2	Samd3
Igf1r	2.91317890342238e-109	-1.9425	0.2	0.433	4.82131108516404e-105	0.icl2	Igf1r
Trib2	6.41203957541124e-109	1.97722	0.297	0.112	1.06119254973056e-104	0.icl2	Trib2
Cst3	9.05374699519318e-109	-2.6843	0.34	0.582	1.49839512770447e-104	0.icl2	Cst3
Ctsh	1.54692706701337e-108	-5.76196	0.01	0.178	2.56016429590714e-104	0.icl2	Ctsh
Hk2	1.63549223429818e-108	-3.39723	0.022	0.203	2.70673964776349e-104	0.icl2	Hk2
Myo1f	7.89690534952015e-108	-1.6087	0.176	0.426	1.30693783534559e-103	0.icl2	Myo1f
Unc93b1	9.38381481571347e-108	-3.69911	0.032	0.217	1.55302135200058e-103	0.icl2	Unc93b1
Tex2	1.7793589917008e-107	-1.77647	0.161	0.4	2.94483913126482e-103	0.icl2	Tex2
Klf3	1.9071993269893e-107	1.02765	0.609	0.41	3.15641488616729e-103	0.icl2	Klf3
Cd244a	1.9868970997198e-107	-5.14904	0.008	0.174	3.28831470003627e-103	0.icl2	Cd244a
Lmna	2.28676470846441e-107	-2.57523	0.064	0.271	3.7845955925086e-103	0.icl2	Lmna
Arpp21	4.68398150739627e-107	3.44476	0.134	0.015	7.75198939474082e-103	0.icl2	Arpp21
Smad7	4.83688954632114e-107	0.838872	0.68	0.497	8.00505219916148e-103	0.icl2	Smad7
Rap1gap2	1.21445956756029e-106	-3.30582	0.029	0.212	2.00993058431227e-102	0.icl2	Rap1gap2
Psme1	1.40605399009995e-106	0.597314	0.882	0.753	2.32701935361541e-102	0.icl2	Psme1
Arhgdib	3.57268994619568e-106	0.481728	0.966	0.87	5.91280186095384e-102	0.icl2	Arhgdib
Dusp1	1.52653306426339e-105	-1.34846	0.425	0.646	2.5264122213559e-101	0.icl2	Dusp1
Rab3ip	2.26067007718718e-105	1.58184	0.365	0.171	3.74140897774478e-101	0.icl2	Rab3ip
Skap2	2.82690610946604e-105	-2.92125	0.062	0.263	4.67852961116629e-101	0.icl2	Skap2
Stx11	5.04507630597427e-105	-3.83299	0.019	0.193	8.34960128638742e-101	0.icl2	Stx11
Art2b	1.18266663707593e-104	2.62519	0.177	0.037	1.95731328436067e-100	0.icl2	Art2b
Runx1	1.29212052246856e-104	-1.11866	0.533	0.729	2.13845946468547e-100	0.icl2	Runx1
Sytl3	1.72933999082071e-104	-2.64411	0.122	0.338	2.86205768480828e-100	0.icl2	Sytl3
Slamf6	4.13955621619965e-104	1.43313	0.373	0.173	6.85096553781043e-100	0.icl2	Slamf6
Rnf19b	7.04475103067109e-104	-2.09779	0.136	0.365	1.16590629557607e-99	0.icl2	Rnf19b
Cebpb	1.05991732211176e-103	-2.46021	0.168	0.403	1.75416316809496e-99	0.icl2	Cebpb
Icam1	1.87666225463452e-103	-2.07596	0.128	0.355	3.10587603142014e-99	0.icl2	Icam1
Farp1	5.43808867660208e-103	-2.87718	0.031	0.213	9.00003675977644e-99	0.icl2	Farp1
Rnf43	1.79053201328145e-102	-4.06512	0.015	0.181	2.9633304819808e-98	0.icl2	Rnf43
Wdfy4	2.34346588209666e-102	-6.69806	0.006	0.162	3.87843603486997e-98	0.icl2	Wdfy4
Ccdc88a	3.10397914281218e-102	-4.40024	0.024	0.197	5.13708548135416e-98	0.icl2	Ccdc88a
Rpl17	4.85968246222613e-102	0.338323	0.995	0.936	8.04277447498425e-98	0.icl2	Rpl17
Hdac7	1.92367870699858e-101	1.39667	0.423	0.236	3.18368826008264e-97	0.icl2	Hdac7
Ccr7	2.29268976123985e-101	0.807791	0.394	0.18	3.79440155485194e-97	0.icl2	Ccr7
Alcam	2.57774031545852e-101	-3.39914	0.044	0.228	4.26616022208385e-97	0.icl2	Alcam
Ccdc50	7.09653718355961e-101	-1.78128	0.104	0.328	1.17447690387911e-96	0.icl2	Ccdc50
Rorc	1.09346098773296e-100	-4.89452	0.005	0.16	1.80967793469805e-96	0.icl2	Rorc
Cdk14	1.62659725660543e-100	-5.8436	0.008	0.163	2.69201845968198e-96	0.icl2	Cdk14
Ets1	4.69549583011548e-100	0.549048	0.919	0.753	7.77104559884112e-96	0.icl2	Ets1
Fosl2	6.17455068707986e-100	-2.36639	0.079	0.283	1.02188813871172e-95	0.icl2	Fosl2
Pik3ip1	2.60425550922562e-99	1.6855	0.362	0.176	4.3100428677684e-95	0.icl2	Pik3ip1
Birc3	4.57723833245388e-99	-1.57639	0.237	0.485	7.57532944021117e-95	0.icl2	Birc3
Klrc1	5.96585052427885e-99	-4.82402	0.009	0.165	9.87348261768149e-95	0.icl2	Klrc1
Dscam	1.15589841031835e-98	-6.99619	0.006	0.158	1.91301186907686e-94	0.icl2	Dscam
H2-Q7	1.25209453166779e-98	0.487795	0.941	0.801	2.07221644991019e-94	0.icl2	H2-Q7
Atp2b1	1.84636705245404e-98	-1.06163	0.491	0.701	3.05573747181144e-94	0.icl2	Atp2b1
Grk3	2.09677902165518e-98	-6.28879	0.004	0.154	3.47016928083932e-94	0.icl2	Grk3
Ipcef1	5.32748458164588e-98	0.83291	0.627	0.434	8.81698698262393e-94	0.icl2	Ipcef1
Trio	1.00130436287772e-97	-1.6523	0.128	0.357	1.65715872056262e-93	0.icl2	Trio
Cd7	1.02098465933615e-97	-1.56825	0.195	0.424	1.68972961120133e-93	0.icl2	Cd7
Alox5ap	1.25833945683601e-97	-5.54318	0.008	0.16	2.0825518010636e-93	0.icl2	Alox5ap
Rps26	1.28487418277969e-97	0.340847	0.996	0.919	2.12646677250039e-93	0.icl2	Rps26
Ifi213	2.29836702338659e-97	1.62482	0.335	0.152	3.8037974237048e-93	0.icl2	Ifi213
Maml2	2.4558065587509e-97	0.665704	0.78	0.569	4.06435985473274e-93	0.icl2	Maml2
Tmem64	5.03278644475146e-97	-2.09329	0.087	0.29	8.32926156606367e-93	0.icl2	Tmem64
Rasgrp2	8.51198964254511e-97	1.14514	0.51	0.332	1.40873428584122e-92	0.icl2	Rasgrp2
Hlf	1.21011779057768e-96	-4.81472	0.006	0.155	2.00274494340607e-92	0.icl2	Hlf
Pfn1	2.00378499162145e-96	0.391995	0.988	0.911	3.31626416113349e-92	0.icl2	Pfn1
Zfp462	2.10678175834145e-96	-6.27122	0.002	0.147	3.48672381005509e-92	0.icl2	Zfp462
Eml6	2.3011769716866e-96	-3.86246	0.01	0.164	3.80844788814132e-92	0.icl2	Eml6
Ltb4r1	2.75159567329804e-96	-6.24535	0.002	0.147	4.55389083930826e-92	0.icl2	Ltb4r1
Efhd2	4.19749391943606e-96	-1.59548	0.174	0.406	6.94685243666668e-92	0.icl2	Efhd2
Sub1	6.10491797370698e-96	-0.676143	0.812	0.867	1.01036392464851e-91	0.icl2	Sub1
Herpud1	8.48113141667146e-96	-1.42446	0.201	0.445	1.40362724945913e-91	0.icl2	Herpud1
Arnt2	1.13768972208804e-95	-7.63801	0.001	0.143	1.8828764900557e-91	0.icl2	Arnt2
Tshz3	1.15282897660677e-95	-2.86092	0.025	0.192	1.90793195628421e-91	0.icl2	Tshz3
Rps27a	2.65781153950983e-95	0.310597	0.996	0.939	4.39867809788878e-91	0.icl2	Rps27a
Prelid2	7.78635698806308e-95	-3.52353	0.019	0.179	1.28864208152444e-90	0.icl2	Prelid2
Gria3	7.82988678434565e-95	1.10878	0.276	0.098	1.2958462628092e-90	0.icl2	Gria3
Rpl28	1.45564744739985e-94	0.337687	0.996	0.927	2.40909652544675e-90	0.icl2	Rpl28
Adam8	1.56365127213711e-94	-4.98506	0.005	0.151	2.58784285538692e-90	0.icl2	Adam8
Psap	3.09799024742655e-94	-2.01582	0.372	0.588	5.12717385949094e-90	0.icl2	Psap
Arsb	3.75199467462057e-94	-2.48704	0.07	0.261	6.20955118649704e-90	0.icl2	Arsb
Cyfip1	1.4796148304502e-93	-2.58566	0.034	0.207	2.44876254439508e-89	0.icl2	Cyfip1
Atp1b3	1.5906828104269e-93	0.686602	0.777	0.634	2.63258005125652e-89	0.icl2	Atp1b3
Gramd3	1.81138420035253e-93	0.644098	0.572	0.333	2.99784085158344e-89	0.icl2	Gramd3
Irf5	2.00382071872736e-93	-5.66709	0.004	0.146	3.31632328949377e-89	0.icl2	Irf5
Ifi206	3.01405335635522e-93	1.49139	0.393	0.209	4.98825830476788e-89	0.icl2	Ifi206
Anxa5	5.67116379147824e-93	-1.58374	0.114	0.33	9.38577607489649e-89	0.icl2	Anxa5
Rab11fip1	5.79329198994105e-93	-2.52645	0.067	0.256	9.58789824335243e-89	0.icl2	Rab11fip1
Clic4	6.49356774029315e-93	-2.24808	0.123	0.336	1.07468546101852e-88	0.icl2	Clic4
Rps4x	8.10199816932554e-93	0.35047	0.996	0.912	1.34088069702338e-88	0.icl2	Rps4x
Mapkapk2	1.18781611271124e-92	-2.01873	0.115	0.327	1.9658356665371e-88	0.icl2	Mapkapk2
Septin11	1.60800110237729e-92	-1.20932	0.251	0.494	2.66124182443442e-88	0.icl2	Septin11
Fth1	3.17657063167926e-92	-1.00892	0.98	0.931	5.25722439542917e-88	0.icl2	Fth1
Hsp90b1	3.35170391476705e-92	-1.14526	0.512	0.696	5.54706997893947e-88	0.icl2	Hsp90b1
Inpp4b	1.1352353271556e-91	0.324676	0.666	0.444	1.87881446644252e-87	0.icl2	Inpp4b
Itgax	1.41379339871787e-91	-6.35636	0.003	0.141	2.33982807487808e-87	0.icl2	Itgax
Relb	1.49620302474215e-91	-1.88756	0.144	0.365	2.47621600594826e-87	0.icl2	Relb
Lat2	1.60021570248013e-91	-2.86433	0.026	0.189	2.64835698760461e-87	0.icl2	Lat2
Mllt3	1.61555145241218e-91	0.785502	0.706	0.536	2.67373765374215e-87	0.icl2	Mllt3
Klf2	2.74292505689234e-91	0.510345	0.956	0.811	4.53954096915682e-87	0.icl2	Klf2
Ly86	5.0512706812964e-91	-5.17123	0.008	0.15	8.35985297754555e-87	0.icl2	Ly86
Rhoq	1.09653622534046e-90	-2.32579	0.054	0.236	1.81476745293847e-86	0.icl2	Rhoq
Tbc1d8	5.98461232277883e-90	-5.27792	0.015	0.162	9.90453339419897e-86	0.icl2	Tbc1d8
Rapgef6	6.67276771882448e-90	0.551958	0.891	0.774	1.10434305746545e-85	0.icl2	Rapgef6
Pglyrp1	7.96772291405298e-90	-2.46719	0.091	0.286	1.31865814227577e-85	0.icl2	Pglyrp1
Runx2	9.20835881159179e-90	-1.60052	0.264	0.493	1.52398338331844e-85	0.icl2	Runx2
Sidt1	1.2803980435444e-89	0.746662	0.574	0.339	2.11905876206598e-85	0.icl2	Sidt1
Lpcat2	1.73510137210609e-89	-3.683	0.019	0.172	2.87159277083558e-85	0.icl2	Lpcat2
Syngr2	2.16621829225516e-89	-2.356	0.06	0.242	3.58509127368228e-85	0.icl2	Syngr2
Pip5k1b	2.42147769025891e-89	-1.93389	0.091	0.287	4.0075455773785e-85	0.icl2	Pip5k1b
Itga2	2.85038373055929e-89	-4.2287	0.012	0.158	4.71738507407562e-85	0.icl2	Itga2
Ctnna1	3.58215752371267e-89	-2.33348	0.062	0.247	5.92847070174447e-85	0.icl2	Ctnna1
Notch2	3.60796144345622e-89	-1.83852	0.13	0.344	5.97117618892004e-85	0.icl2	Notch2
Scpep1	3.61013620010746e-89	-2.4758	0.037	0.206	5.97477541117784e-85	0.icl2	Scpep1
Arhgap26	9.90876089038232e-89	-1.04405	0.458	0.665	1.63989992735827e-84	0.icl2	Arhgap26
Furin	1.39378495844713e-88	-2.36789	0.077	0.266	2.30671410623001e-84	0.icl2	Furin
Fgf13	2.52425431287189e-88	0.819956	0.609	0.392	4.17764088780298e-84	0.icl2	Fgf13
Kcnk1	5.55277154360336e-88	-6.61794	0.001	0.134	9.18983690466356e-84	0.icl2	Kcnk1
Prkce	7.0527201537047e-88	-1.52269	0.116	0.326	1.16722518543813e-83	0.icl2	Prkce
Spag9	1.02610124133404e-87	-1.48728	0.374	0.597	1.69819755440784e-83	0.icl2	Spag9
Serpina3g	1.4123438081574e-87	-2.80236	0.032	0.193	2.33742900250049e-83	0.icl2	Serpina3g
Fndc3b	3.07386547429662e-87	-3.08739	0.027	0.185	5.08724735996091e-83	0.icl2	Fndc3b
Rnf216	4.00187871781934e-87	-2.26953	0.053	0.229	6.623109277991e-83	0.icl2	Rnf216
Ccl5	4.59217713997515e-87	-2.66073	0.299	0.479	7.60005316665887e-83	0.icl2	Ccl5
Cpd	1.17853180397998e-86	-3.1493	0.013	0.157	1.95047013558687e-82	0.icl2	Cpd
Plxnd1	2.11155650110267e-86	-4.57679	0.004	0.137	3.49462600932491e-82	0.icl2	Plxnd1
Kcnn4	3.42516657400363e-86	1.38184	0.354	0.18	5.66865067997601e-82	0.icl2	Kcnn4
Rnh1	3.90388420764559e-86	-1.36951	0.135	0.355	6.46092836365346e-82	0.icl2	Rnh1
Cbfa2t3	4.9747971024944e-86	-5.05972	0.008	0.145	8.23328920462823e-82	0.icl2	Cbfa2t3
Car2	7.58830076512665e-86	-4.72228	0.01	0.149	1.25586377662846e-81	0.icl2	Car2
Fgr	9.01158712777867e-86	-4.119	0.027	0.178	1.49141766964737e-81	0.icl2	Fgr
Slc15a3	1.05004701373087e-85	-6.12443	0.004	0.135	1.73782780772458e-81	0.icl2	Slc15a3
Tnik	1.07932513451524e-85	0.759361	0.714	0.546	1.78628309762271e-81	0.icl2	Tnik
Rps12	3.72053277163608e-85	-0.363725	0.994	0.938	6.15748173705771e-81	0.icl2	Rps12
F2r	5.40014125529435e-85	-2.17359	0.058	0.231	8.93723377751215e-81	0.icl2	F2r
Zbtb46	6.06405961699048e-85	-5.41059	0.006	0.139	1.00360186661192e-80	0.icl2	Zbtb46
Cks2	6.44818350298005e-85	-2.44229	0.059	0.235	1.0671743697432e-80	0.icl2	Cks2
Trim59	6.73574873303817e-85	1.77799	0.315	0.15	1.11476641531782e-80	0.icl2	Trim59
Kdm6b	1.14197802085028e-84	-1.70909	0.199	0.416	1.88997362450722e-80	0.icl2	Kdm6b
Rpl23	2.58971124106443e-84	0.303104	0.997	0.94	4.28597210396162e-80	0.icl2	Rpl23
Dtx1	5.5426174793748e-84	1.78295	0.282	0.123	9.17303192836529e-80	0.icl2	Dtx1
Myo5a	7.38784832177763e-84	-3.10635	0.03	0.185	1.2226888972542e-79	0.icl2	Myo5a
Map3k8	1.48795849452438e-83	-1.62037	0.128	0.332	2.46257130843785e-79	0.icl2	Map3k8
Plbd1	1.89971199800931e-83	-6.43015	0.005	0.135	3.14402335670541e-79	0.icl2	Plbd1
Slc8a1	2.37493852584737e-83	-7.26562	0.001	0.126	3.9305232602774e-79	0.icl2	Slc8a1
Fam241a	3.84195826272735e-83	1.60071	0.336	0.166	6.35844092481376e-79	0.icl2	Fam241a
Ero1a	5.61705093026362e-83	-1.8376	0.09	0.279	9.2962192895863e-79	0.icl2	Ero1a
Cited4	7.3867556378326e-83	-4.49501	0.009	0.143	1.22250805806129e-78	0.icl2	Cited4
Sat1	9.87231619945533e-83	-1.289	0.335	0.565	1.63386833100986e-78	0.icl2	Sat1
Mpeg1	1.15020434461609e-82	-6.40316	0.005	0.133	1.90358819033962e-78	0.icl2	Mpeg1
Camk2n1	1.30199296224879e-82	-5.02932	0.005	0.133	2.15479835252175e-78	0.icl2	Camk2n1
Klf12	1.851125727893e-82	-3.4558	0.02	0.163	3.06361307966292e-78	0.icl2	Klf12
Klri2	2.03543604431656e-82	-6.92776	0.003	0.129	3.36864665334391e-78	0.icl2	Klri2
Gpx1	2.19798806096532e-82	-1.39595	0.412	0.589	3.63767024089761e-78	0.icl2	Gpx1
Chd3	3.15649321318343e-82	0.669698	0.625	0.467	5.22399626781858e-78	0.icl2	Chd3
Snx18	4.79475519713102e-82	-1.63838	0.106	0.301	7.93531985125183e-78	0.icl2	Snx18
Dgat1	6.21733301317319e-82	-2.87959	0.053	0.217	1.02896861368016e-77	0.icl2	Dgat1
Prkca	2.25235978601467e-81	0.532144	0.649	0.453	3.72765544585428e-77	0.icl2	Prkca
Cybb	3.20326491228227e-81	-6.92885	0.005	0.132	5.30140342982715e-77	0.icl2	Cybb
Smox	8.47681170306965e-81	-2.22857	0.059	0.229	1.40291233685803e-76	0.icl2	Smox
Tanc1	1.12918352489868e-80	1.29785	0.37	0.2	1.86879873370732e-76	0.icl2	Tanc1
Cdkn1a	1.39165710628152e-80	-3.8149	0.011	0.143	2.30319251089591e-76	0.icl2	Cdkn1a
Rps2	1.53966733794915e-80	0.327817	0.995	0.907	2.54814944430584e-76	0.icl2	Rps2
Hnrnpf	1.580348100564e-80	0.486191	0.904	0.815	2.61547610643342e-76	0.icl2	Hnrnpf
Slc9a9	2.5428988117161e-80	0.610047	0.812	0.69	4.20849753339014e-76	0.icl2	Slc9a9
Fyb	6.72310813406485e-80	0.375502	0.847	0.655	1.11267439618773e-75	0.icl2	Fyb
Aoah	6.89601383141399e-80	-5.32161	0.003	0.126	1.14129028909902e-75	0.icl2	Aoah
Gfod1	7.40798688390997e-80	-1.86366	0.106	0.297	1.2260218292871e-75	0.icl2	Gfod1
Sirpa	8.03468752147175e-80	-6.69058	0.003	0.125	1.32974078480357e-75	0.icl2	Sirpa
Reep5	8.20025905994071e-80	-0.921125	0.36	0.59	1.35714287442019e-75	0.icl2	Reep5
Pard3	1.24297227091722e-79	-6.20344	0.003	0.124	2.057119108368e-75	0.icl2	Pard3
Fes	2.07296605830265e-79	-4.95786	0.004	0.128	3.43075882649088e-75	0.icl2	Fes
Nav1	2.56358834446888e-79	-5.94281	0.006	0.132	4.242738710096e-75	0.icl2	Nav1
Cd9	4.90143365179575e-79	-1.84704	0.193	0.391	8.11187269372196e-75	0.icl2	Cd9
Mthfs	1.08287317186869e-78	-2.00295	0.054	0.221	1.79215509944269e-74	0.icl2	Mthfs
Syne2	1.22579640820443e-78	-2.44476	0.037	0.19	2.02869305557833e-74	0.icl2	Syne2
Gsap	1.44401664397332e-78	-2.19528	0.074	0.247	2.38984754577584e-74	0.icl2	Gsap
Pbx1	2.0764060536441e-78	-5.5311	0.008	0.134	3.43645201878099e-74	0.icl2	Pbx1
Kcnq5	3.81189180802512e-78	-1.70715	0.175	0.369	6.30868094228158e-74	0.icl2	Kcnq5
Rps6	4.33521834005176e-78	0.34417	0.994	0.903	7.17478635278566e-74	0.icl2	Rps6
Fmnl2	4.62997741968617e-78	-6.23336	0.006	0.129	7.66261262958061e-74	0.icl2	Fmnl2
Cd226	8.93497606177487e-78	0.747249	0.612	0.427	1.47873853822374e-73	0.icl2	Cd226
Ccl3	1.09737182930558e-77	-4.58144	0.022	0.159	1.81615037750074e-73	0.icl2	Ccl3
H2az1	1.31277757265311e-77	-1.01968	0.753	0.835	2.17264688274089e-73	0.icl2	H2az1
Itgal	1.66584503185011e-77	-0.981014	0.368	0.595	2.75697352771194e-73	0.icl2	Itgal
Jak1	2.30805980655008e-77	0.440841	0.929	0.835	3.81983897984039e-73	0.icl2	Jak1
Bach2	2.42589738312263e-77	0.402181	0.775	0.579	4.01486016906795e-73	0.icl2	Bach2
Iqgap1	2.67040260571651e-77	-0.917701	0.579	0.742	4.41951631246083e-73	0.icl2	Iqgap1
Add3	2.68362414032066e-77	0.80776	0.605	0.458	4.4413979522307e-73	0.icl2	Add3
Junb	2.76782102769239e-77	-0.926297	0.723	0.826	4.5807438008309e-73	0.icl2	Junb
Tle5	4.20650285807286e-77	0.588306	0.785	0.685	6.96176223011058e-73	0.icl2	Tle5
Mgst2	4.37512941338796e-77	1.32773	0.383	0.221	7.24083917915707e-73	0.icl2	Mgst2
Lrrfip2	6.75771858169535e-77	-1.37234	0.118	0.314	1.11840242527058e-72	0.icl2	Lrrfip2
Tox	7.56872278456095e-77	0.467623	0.77	0.569	1.25262362084484e-72	0.icl2	Tox
Ptpre	1.17518327027885e-76	-1.64759	0.127	0.322	1.9449283123115e-72	0.icl2	Ptpre
Csf2rb	1.2685208312437e-76	-5.58086	0.005	0.125	2.09940197570832e-72	0.icl2	Csf2rb
Pde5a	1.52305274027522e-76	-3.91849	0.012	0.14	2.52065228515549e-72	0.icl2	Pde5a
Rpl13	1.69062027529256e-76	0.288174	0.997	0.953	2.79797655560918e-72	0.icl2	Rpl13
Spry2	3.21046310120789e-76	-2.73289	0.032	0.176	5.31331643249906e-72	0.icl2	Spry2
Ncf2	3.69600300077551e-76	-4.38442	0.011	0.137	6.11688496628346e-72	0.icl2	Ncf2
Sdc1	8.14117776068849e-76	-6.34391	0.001	0.117	1.34736491939395e-71	0.icl2	Sdc1
Nrp1	8.27670080902164e-76	-5.44381	0.005	0.124	1.36979398389308e-71	0.icl2	Nrp1
Evl	8.55087582573745e-76	0.694928	0.646	0.495	1.41516994915955e-71	0.icl2	Evl
Glp2r	1.59921534916017e-75	-4.40825	0.005	0.124	2.64670140286008e-71	0.icl2	Glp2r
Cish	1.89597075562449e-75	-2.79216	0.026	0.166	3.13783160055853e-71	0.icl2	Cish
Rpl26	2.12711956149768e-75	0.293671	0.996	0.932	3.52038287427867e-71	0.icl2	Rpl26
Top2b	2.25934355714293e-75	0.774979	0.652	0.536	3.73921358707156e-71	0.icl2	Top2b
Rpl36	2.26113260748922e-75	0.286872	0.996	0.931	3.74217446539466e-71	0.icl2	Rpl36
Lsp1	3.9647143089411e-75	-0.898202	0.585	0.735	6.56160218129752e-71	0.icl2	Lsp1
Eea1	6.78729487501494e-75	-1.63217	0.086	0.265	1.12329730181497e-70	0.icl2	Eea1
Zfp36	8.78053231447642e-75	-1.20072	0.433	0.614	1.45317809804585e-70	0.icl2	Zfp36
Inpp5d	9.24885240474306e-75	-1.01291	0.413	0.634	1.53068507298498e-70	0.icl2	Inpp5d
Nudt4	1.85377728704117e-74	-1.65386	0.077	0.25	3.06800141005313e-70	0.icl2	Nudt4
Sptssa	2.18039494826061e-74	-1.28141	0.293	0.503	3.60855363937132e-70	0.icl2	Sptssa
Klf13	3.02390742946637e-74	0.677951	0.678	0.555	5.00456679576685e-70	0.icl2	Klf13
Lmnb1	3.50252680557611e-74	-2.9207	0.081	0.249	5.79668186322846e-70	0.icl2	Lmnb1
Nr4a3	4.9674341894612e-74	-2.22161	0.08	0.248	8.22110358355829e-70	0.icl2	Nr4a3
Rhob	1.30636227894608e-73	-1.14706	0.268	0.484	2.16202957165576e-69	0.icl2	Rhob
Pirb	1.3380918493867e-73	-5.4003	0.006	0.123	2.21454201073498e-69	0.icl2	Pirb
Ifitm2	2.10872982898106e-73	-5.96522	0.008	0.126	3.48994786696366e-69	0.icl2	Ifitm2
Arhgef18	2.64890865787827e-73	0.725845	0.596	0.428	4.38394382878853e-69	0.icl2	Arhgef18
Sox4	3.0926698705007e-73	1.22902	0.264	0.11	5.11836863567865e-69	0.icl2	Sox4
Cerk	3.52385719058559e-73	-1.42813	0.14	0.334	5.83198365041915e-69	0.icl2	Cerk
Naca	7.46664162781819e-73	0.360093	0.986	0.88	1.23572918940391e-68	0.icl2	Naca
Rras2	1.46584208333405e-72	0.825268	0.523	0.349	2.42596864791785e-68	0.icl2	Rras2
Rac2	1.61592974511384e-72	0.423132	0.929	0.814	2.6743637281634e-68	0.icl2	Rac2
Coro2b	1.97633869944818e-72	-4.37867	0.006	0.121	3.27084054758674e-68	0.icl2	Coro2b
Nfkbiz	3.01821606432061e-72	-1.33393	0.342	0.541	4.9951475864506e-68	0.icl2	Nfkbiz
Hhex	3.55194225514352e-72	-6.13662	0.002	0.112	5.87846443226252e-68	0.icl2	Hhex
Rpsa	4.31039432877748e-72	0.294417	0.999	0.949	7.13370261412673e-68	0.icl2	Rpsa
Tmcc3	7.86541241315411e-72	-5.69367	0.008	0.124	1.30172575437701e-67	0.icl2	Tmcc3
Fau	2.34043468125835e-71	0.246289	0.998	0.955	3.87341939748257e-67	0.icl2	Fau
Xkr6	3.3634639654642e-71	-5.38271	0.003	0.114	5.56653286284326e-67	0.icl2	Xkr6
Irak3	3.55014492121806e-71	-3.31122	0.015	0.14	5.87548984461589e-67	0.icl2	Irak3
Kynu	3.97869355845875e-71	-6.54792	0.002	0.111	6.58473783924923e-67	0.icl2	Kynu
Rrbp1	4.25740627344729e-71	-1.24895	0.276	0.488	7.04600738255526e-67	0.icl2	Rrbp1
Specc1	5.12514635214376e-71	-4.55123	0.008	0.125	8.48211721279792e-67	0.icl2	Specc1
Marchf1	6.06900261774881e-71	-6.07168	0.003	0.113	1.00441993323743e-66	0.icl2	Marchf1
Rpl6	6.42398511657718e-71	0.314086	0.997	0.913	1.06316953679352e-66	0.icl2	Rpl6
Metrnl	6.65263276616083e-71	-4.52872	0.008	0.123	1.10101072279962e-66	0.icl2	Metrnl
Entpd1	6.88758891114037e-71	-5.13977	0.01	0.127	1.13989596479373e-66	0.icl2	Entpd1
Socs2	7.94292326351623e-71	-5.43272	0.004	0.114	1.31455380011194e-66	0.icl2	Socs2
Srgap3	1.39120265024734e-70	-2.24683	0.07	0.227	2.30244038615935e-66	0.icl2	Srgap3
Rassf4	1.48498690479846e-70	-5.27637	0.001	0.108	2.45765332744146e-66	0.icl2	Rassf4
Rpl34	1.51406488416729e-70	0.288862	0.996	0.926	2.50577738329687e-66	0.icl2	Rpl34
Pld4	1.53307677335291e-70	-5.078	0.008	0.122	2.53724205989906e-66	0.icl2	Pld4
Setbp1	3.9434323691403e-70	-1.9458	0.101	0.267	6.5263805709272e-66	0.icl2	Setbp1
Clcn3	4.77356686162403e-70	-1.12362	0.29	0.494	7.90025315598778e-66	0.icl2	Clcn3
Lyst	4.99718047581227e-70	-1.67428	0.296	0.496	8.27033368746931e-66	0.icl2	Lyst
Ltb	5.08422665566308e-70	0.402575	0.911	0.715	8.4143951151224e-66	0.icl2	Ltb
Gimap8	5.29973705790744e-70	0.909366	0.499	0.341	8.77106483083682e-66	0.icl2	Gimap8
Mtss1	7.08125212542761e-70	-1.82958	0.076	0.239	1.17194722675827e-65	0.icl2	Mtss1
Rps17	1.7633473621003e-69	0.382705	0.957	0.855	2.918339884276e-65	0.icl2	Rps17
Ppp3ca	1.80204881176376e-69	-0.80157	0.501	0.7	2.98239078346902e-65	0.icl2	Ppp3ca
St3gal3	3.14440363007094e-69	-1.86104	0.096	0.263	5.20398800776741e-65	0.icl2	St3gal3
Snrpd3	5.1767306288234e-69	0.799206	0.608	0.501	8.56748919070273e-65	0.icl2	Snrpd3
Stk38	5.39221093270732e-69	0.824895	0.563	0.434	8.92410909363061e-65	0.icl2	Stk38
Fstl4	8.26308573068339e-69	-6.41056	0.003	0.109	1.3675406884281e-64	0.icl2	Fstl4
Klf4	1.52294697614958e-68	-1.8155	0.148	0.326	2.52047724552756e-64	0.icl2	Klf4
Pacsin2	1.70193928980369e-68	-1.91107	0.063	0.219	2.8167095246251e-64	0.icl2	Pacsin2
Kit	1.84586002735845e-68	-3.41586	0.019	0.142	3.05489834527824e-64	0.icl2	Kit
Il10ra	1.97004890995501e-68	-2.03831	0.072	0.229	3.26043094597555e-64	0.icl2	Il10ra
Cd28	2.04654045456512e-68	0.847927	0.504	0.314	3.38702445230527e-64	0.icl2	Cd28
Klra7	3.08053985962017e-68	-6.54555	0.004	0.111	5.09829346767139e-64	0.icl2	Klra7
Slc41a2	3.08959613457908e-68	-6.55592	0.002	0.107	5.11328160272838e-64	0.icl2	Slc41a2
Ccrl2	4.61627439084185e-68	-3.77755	0.022	0.146	7.63993411684325e-64	0.icl2	Ccrl2
Cd82	5.82233039899165e-68	-0.90841	0.347	0.557	9.63595681033117e-64	0.icl2	Cd82
Csf2ra	1.33368877088233e-67	-3.49419	0.027	0.155	2.20725491581026e-63	0.icl2	Csf2ra
Tnfrsf1b	1.72701683180153e-67	-1.4446	0.134	0.316	2.85821285663154e-63	0.icl2	Tnfrsf1b
Nck2	2.22084853081024e-67	0.914063	0.437	0.272	3.67550431849094e-63	0.icl2	Nck2
Rpl18a	2.29393772940328e-67	0.282821	0.997	0.94	3.79646694216243e-63	0.icl2	Rpl18a
Kcnip3	2.29808351149556e-67	-6.04428	0.002	0.105	3.80332821152515e-63	0.icl2	Kcnip3
Tbx21	2.79756838372702e-67	-2.45336	0.035	0.169	4.62997567506821e-63	0.icl2	Tbx21
Grn	2.81327180784436e-67	-3.68828	0.019	0.14	4.65596484198241e-63	0.icl2	Grn
Marcks	3.075056637565e-67	-3.11399	0.061	0.204	5.08921873517007e-63	0.icl2	Marcks
Bicdl1	3.70126538199065e-67	1.56048	0.248	0.11	6.12559420719452e-63	0.icl2	Bicdl1
Cotl1	3.71030614331657e-67	0.510708	0.815	0.695	6.14055666718893e-63	0.icl2	Cotl1
Ankrd6	4.0787534724245e-67	-4.07466	0.009	0.12	6.75033699686254e-63	0.icl2	Ankrd6
Vcl	4.41483118168819e-67	-2.36801	0.035	0.17	7.30654560569395e-63	0.icl2	Vcl
Hgsnat	5.96099813832377e-67	-2.07501	0.061	0.211	9.86545191892584e-63	0.icl2	Hgsnat
Prr5l	5.98006354798876e-67	-3.48458	0.015	0.132	9.89700517192139e-63	0.icl2	Prr5l
Runx3	6.77111354209159e-67	0.725408	0.628	0.507	1.12061929121616e-62	0.icl2	Runx3
Cytip	7.61886032500982e-67	0.404784	0.821	0.715	1.26092138378913e-62	0.icl2	Cytip
Unc119	8.15661737354406e-67	-1.44948	0.078	0.241	1.34992017532154e-62	0.icl2	Unc119
Atrnl1	1.42055579656467e-66	-1.68037	0.149	0.325	2.35101984331454e-62	0.icl2	Atrnl1
Zfp516	2.04517575967031e-66	-2.48163	0.036	0.17	3.38476588225437e-62	0.icl2	Zfp516
Ccl4	2.93829004608384e-66	-4.05656	0.042	0.176	4.86287002626876e-62	0.icl2	Ccl4
Stk4	3.11661561305379e-66	0.514198	0.779	0.683	5.15799883960403e-62	0.icl2	Stk4
Nfkbid	3.74201896163033e-66	-1.54309	0.113	0.284	6.1930413814982e-62	0.icl2	Nfkbid
Cfl1	4.47199696131293e-66	0.36772	0.968	0.875	7.4011549709729e-62	0.icl2	Cfl1
Cxcr6	4.60436514204259e-66	-1.81672	0.212	0.375	7.62022431008048e-62	0.icl2	Cxcr6
Il27ra	4.94158612621822e-66	1.04247	0.441	0.293	8.17832503889115e-62	0.icl2	Il27ra
Kdm2b	6.13899511743441e-66	-1.48197	0.215	0.405	1.0160036919354e-61	0.icl2	Kdm2b
Arhgef1	6.88904209740424e-66	0.62666	0.675	0.574	1.1401364671204e-61	0.icl2	Arhgef1
Leprotl1	6.97115281815892e-66	0.655983	0.658	0.546	1.1537257914053e-61	0.icl2	Leprotl1
Hmgn3	7.50724960935811e-66	-4.79931	0.005	0.11	1.24244981034877e-61	0.icl2	Hmgn3
Ogfrl1	8.36775415909191e-66	-4.24809	0.009	0.119	1.38486331332971e-61	0.icl2	Ogfrl1
Art4	9.5229971453337e-66	3.26579	0.097	0.016	1.57605602755273e-61	0.icl2	Art4
1700025G04Rik	9.97908795295648e-66	-1.71466	0.116	0.282	1.6515390562143e-61	0.icl2	1700025G04Rik
Lamc1	1.04912801977866e-65	-4.64762	0.005	0.109	1.73630687273368e-61	0.icl2	Lamc1
Grk5	1.41006253650787e-65	-2.22876	0.053	0.194	2.33365349792053e-61	0.icl2	Grk5
Serpinb6b	1.95693614957639e-65	-2.68462	0.057	0.198	3.23872932754892e-61	0.icl2	Serpinb6b
Rpl37a	2.16201561415982e-65	0.265437	0.997	0.952	3.5781358414345e-61	0.icl2	Rpl37a
Eef1b2	4.62040584251942e-65	0.307553	0.985	0.891	7.64677166936964e-61	0.icl2	Eef1b2
Arhgap45	5.07132773727985e-65	0.458617	0.806	0.709	8.39304740519816e-61	0.icl2	Arhgap45
Cnn2	7.40880944425173e-65	0.664393	0.678	0.578	1.22615796302366e-60	0.icl2	Cnn2
Rbm47	8.09643612632217e-65	-2.97945	0.03	0.156	1.33996017890632e-60	0.icl2	Rbm47
Rin3	8.35533719295532e-65	-1.23242	0.161	0.352	1.38280830543411e-60	0.icl2	Rin3
Cox7a2l	1.04263259837586e-64	0.511159	0.826	0.745	1.72555695031205e-60	0.icl2	Cox7a2l
Maml3	1.17556999621534e-64	0.762227	0.43	0.263	1.94556834373638e-60	0.icl2	Maml3
Akap13	1.47940809891384e-64	0.358529	0.934	0.874	2.4484204037024e-60	0.icl2	Akap13
Septin8	1.68862066688485e-64	-4.11229	0.004	0.105	2.79466720369443e-60	0.icl2	Septin8
Psmb8	1.75961592243539e-64	0.436455	0.882	0.782	2.91216435163056e-60	0.icl2	Psmb8
Ciita	2.1663181931983e-64	-5.6616	0.005	0.107	3.58525660974319e-60	0.icl2	Ciita
H2-DMb1	2.34386220720171e-64	-4.77324	0.008	0.113	3.87909195291883e-60	0.icl2	H2-DMb1
Ly6g5b	3.22423270591015e-64	-4.58406	0.004	0.107	5.33610512828131e-60	0.icl2	Ly6g5b
Pdk1	5.32759101275682e-64	1.44212	0.287	0.148	8.81716312611254e-60	0.icl2	Pdk1
Cdh10	7.02899039377346e-64	-9.94767	0	0.096	1.16329791016951e-59	0.icl2	Cdh10
Klrb1b	7.92925736877454e-64	-6.00098	0.002	0.101	1.31229209453219e-59	0.icl2	Klrb1b
Arhgap31	1.02691374567678e-63	-1.57034	0.196	0.374	1.69954224909507e-59	0.icl2	Arhgap31
Pdgfb	1.06082476834784e-63	-4.83526	0.004	0.104	1.75566499161568e-59	0.icl2	Pdgfb
Epsti1	1.57363024378765e-63	0.43698	0.748	0.597	2.60435805346856e-59	0.icl2	Epsti1
Bcl2a1a	1.94324187442137e-63	-6.45983	0.002	0.1	3.21606530216737e-59	0.icl2	Bcl2a1a
Sdf2l1	1.95794395818535e-63	-1.68753	0.086	0.246	3.24039725079676e-59	0.icl2	Sdf2l1
Hck	2.6774080773438e-63	-5.33084	0.002	0.099	4.43111036800398e-59	0.icl2	Hck
Zfhx3	2.6804092925448e-63	-2.96649	0.021	0.139	4.43607737916164e-59	0.icl2	Zfhx3
Cysltr1	5.75197360850684e-63	-5.48572	0.003	0.101	9.51951632207883e-59	0.icl2	Cysltr1
Tmtc2	6.48256788246915e-63	-2.76083	0.045	0.178	1.07286498454864e-58	0.icl2	Tmtc2
Xylt1	8.9779371671196e-63	-1.7064	0.192	0.375	1.48584860115829e-58	0.icl2	Xylt1
Gcnt1	1.24598764043262e-62	-5.98179	0.002	0.098	2.06210954491599e-58	0.icl2	Gcnt1
Zc3h12a	1.59646390652066e-62	-1.20484	0.169	0.355	2.6421477652917e-58	0.icl2	Zc3h12a
Mfsd10	2.34412319061473e-62	-1.67057	0.054	0.197	3.87952388046738e-58	0.icl2	Mfsd10
Daam1	2.73978703964386e-62	-1.89959	0.074	0.224	4.53434755061059e-58	0.icl2	Daam1
Grina	3.10104336426234e-62	-2.21189	0.06	0.203	5.13222676785417e-58	0.icl2	Grina
Snrpg	3.80610568524806e-62	0.414311	0.933	0.818	6.29910490908554e-58	0.icl2	Snrpg
Ppia	4.22028884320055e-62	0.278446	0.998	0.902	6.9845780354969e-58	0.icl2	Ppia
Rps15	4.35545598381851e-62	0.331179	0.984	0.901	7.20827965321963e-58	0.icl2	Rps15
Vav3	5.54420712213057e-62	-1.64076	0.138	0.311	9.1756627871261e-58	0.icl2	Vav3
Man1c1	5.72789627745461e-62	-3.1075	0.015	0.126	9.47966833918737e-58	0.icl2	Man1c1
Gm2a	5.82671523644298e-62	-1.42701	0.199	0.381	9.64321371631313e-58	0.icl2	Gm2a
Rpl22l1	9.44035477571554e-62	0.382373	0.941	0.836	1.56237871538092e-57	0.icl2	Rpl22l1
Rps11	1.09535964981786e-61	0.285291	0.998	0.928	1.81282022044855e-57	0.icl2	Rps11
Itgam	1.29904480573268e-61	-6.42812	0.001	0.096	2.14991915348759e-57	0.icl2	Itgam
Rplp0	1.31905033865605e-61	0.278654	0.996	0.929	2.18302831047576e-57	0.icl2	Rplp0
Cd300lf	1.32206733025556e-61	-5.41471	0.003	0.099	2.18802143157295e-57	0.icl2	Cd300lf
Aqp3	1.47661135925095e-61	-2.76316	0.021	0.136	2.44379179956033e-57	0.icl2	Aqp3
Gimap9	2.08917202575048e-61	0.945171	0.467	0.318	3.45757970261704e-57	0.icl2	Gimap9
Stat5b	2.24433529780562e-61	0.705819	0.563	0.425	3.71437491786829e-57	0.icl2	Stat5b
Cd300c2	3.93261747975763e-61	-6.99272	0.001	0.095	6.50848192899887e-57	0.icl2	Cd300c2
Eya1	4.07272095346747e-61	-5.33569	0.004	0.101	6.74035317798866e-57	0.icl2	Eya1
Cd300a	4.93067676488493e-61	-7.52569	0.001	0.094	8.16027004588456e-57	0.icl2	Cd300a
Rab8b	7.35612390549653e-61	-0.903617	0.52	0.696	1.21743850635968e-56	0.icl2	Rab8b
Dap	8.75532892444304e-61	-1.10032	0.205	0.396	1.44900693699532e-56	0.icl2	Dap
Bcl11a	1.02769698634822e-60	-6.91238	0.001	0.095	1.70083851240631e-56	0.icl2	Bcl11a
Avpi1	1.27736585766814e-60	-2.2373	0.04	0.168	2.11404049444077e-56	0.icl2	Avpi1
Batf3	1.29356128782133e-60	-5.93227	0.004	0.099	2.14084393134431e-56	0.icl2	Batf3
Lysmd2	1.39507776658009e-60	-2.65696	0.018	0.13	2.30885370369005e-56	0.icl2	Lysmd2
Klra8	1.49075231636212e-60	-7.63572	0.003	0.098	2.46719508357932e-56	0.icl2	Klra8
Lilrb4b	1.60707686606295e-60	-4.281	0.015	0.122	2.65971221333418e-56	0.icl2	Lilrb4b
Naip2	1.6659021864663e-60	-4.68371	0.003	0.098	2.75706811860173e-56	0.icl2	Naip2
Zc3h12c	2.11946279664745e-60	-6.07209	0.004	0.099	3.50771092845152e-56	0.icl2	Zc3h12c
Cyp4f16	2.71765218248382e-60	-3.28654	0.012	0.116	4.49771436201073e-56	0.icl2	Cyp4f16
Rassf3	2.73179246069293e-60	-1.5611	0.178	0.354	4.5211165224468e-56	0.icl2	Rassf3
Pbx3	2.83007875004455e-60	-2.29484	0.031	0.151	4.68378033132372e-56	0.icl2	Pbx3
Il17re	3.33992650306224e-60	-9.02493	0	0.091	5.52757836256801e-56	0.icl2	Il17re
Rnase6	3.61574304794441e-60	-4.77364	0.01	0.112	5.984054744348e-56	0.icl2	Rnase6
Apba1	4.19016177194562e-60	-7.18392	0.001	0.094	6.93471773257001e-56	0.icl2	Apba1
Nfkb2	4.39263285349839e-60	-1.39849	0.109	0.277	7.26980737253983e-56	0.icl2	Nfkb2
Sulf2	4.61586744867238e-60	-5.72772	0.002	0.095	7.63926062755279e-56	0.icl2	Sulf2
Serp1	4.85409327580704e-60	-1.04594	0.278	0.474	8.03352437146066e-56	0.icl2	Serp1
Plekho2	7.54769736190484e-60	-1.79185	0.09	0.244	1.24914391339525e-55	0.icl2	Plekho2
Myadm	7.66531594939179e-60	-4.11036	0.006	0.105	1.26860978962434e-55	0.icl2	Myadm
Slc28a2b	7.98163503520213e-60	2.54375	0.112	0.025	1.32096059832595e-55	0.icl2	Slc28a2b
Arhgap24	8.02286144882174e-60	-6.8052	0.003	0.096	1.32778356978e-55	0.icl2	Arhgap24
Cd180	2.54590616318271e-59	-6.03283	0.001	0.093	4.21347470006738e-55	0.icl2	Cd180
St6galnac3	2.80601046313107e-59	-1.55304	0.427	0.537	4.64394731648192e-55	0.icl2	St6galnac3
Fabp5	2.84291626764139e-59	-3.77059	0.025	0.139	4.7050264229465e-55	0.icl2	Fabp5
Hopx	3.30206633618085e-59	-1.64645	0.078	0.225	5.46491978637931e-55	0.icl2	Hopx
App	3.49043303086653e-59	-2.91101	0.03	0.148	5.77666666608411e-55	0.icl2	App
Eef1g	3.51464298445061e-59	0.458497	0.833	0.732	5.81673413926576e-55	0.icl2	Eef1g
Rpl32	5.19480362421375e-59	0.262534	0.996	0.93	8.59739999807376e-55	0.icl2	Rpl32
Clec12a	5.60820221017736e-59	-4.16341	0.011	0.112	9.28157465784353e-55	0.icl2	Clec12a
Prkcd	5.61681849326238e-59	-2.01333	0.086	0.233	9.29583460634923e-55	0.icl2	Prkcd
Rogdi	5.75845453281161e-59	-4.72248	0.007	0.104	9.53024225180321e-55	0.icl2	Rogdi
Gimap1	7.22683548855778e-59	0.698479	0.595	0.467	1.19604127335631e-54	0.icl2	Gimap1
Rasa4	7.28592163321903e-59	-4.03465	0.01	0.11	1.20582003029775e-54	0.icl2	Rasa4
N4bp1	1.0079288186202e-58	-1.59637	0.105	0.263	1.66812219481643e-54	0.icl2	N4bp1
Ankrd33b	1.05856965070019e-58	-6.69527	0.002	0.093	1.75193277190882e-54	0.icl2	Ankrd33b
Il1b	1.19769773861025e-58	-7.54625	0.008	0.104	1.98218975739996e-54	0.icl2	Il1b
Mif	1.27139811451152e-58	0.476652	0.726	0.61	2.10416387951656e-54	0.icl2	Mif
Atp2b4	1.65893864879224e-58	-1.73505	0.058	0.195	2.74554346375116e-54	0.icl2	Atp2b4
Slfn5	1.66760065960626e-58	1.23712	0.283	0.148	2.75987909164836e-54	0.icl2	Slfn5
Cobll1	1.84174551055143e-58	-1.0749	0.14	0.313	3.04808881996262e-54	0.icl2	Cobll1
Klrb1a	2.81663878333479e-58	-7.09989	0.001	0.09	4.66153718641908e-54	0.icl2	Klrb1a
Tespa1	2.85060666145623e-58	0.767981	0.572	0.447	4.71775402471006e-54	0.icl2	Tespa1
Tnfaip2	3.25486635508315e-58	-7.29005	0.002	0.093	5.38680381766262e-54	0.icl2	Tnfaip2
Syne3	3.87999143641184e-58	-2.59096	0.016	0.123	6.4213858272616e-54	0.icl2	Syne3
Shtn1	3.9425009964859e-58	-7.54639	0.001	0.09	6.52483914918417e-54	0.icl2	Shtn1
Tnfsf14	5.36478518321934e-58	-2.74525	0.018	0.125	8.878719478228e-54	0.icl2	Tnfsf14
Sdccag8	6.78148657438673e-58	-1.15791	0.157	0.336	1.122336028061e-53	0.icl2	Sdccag8
Tiam1	7.27588395136956e-58	-1.82597	0.061	0.197	1.20415879395166e-53	0.icl2	Tiam1
Fasl	9.57808093867082e-58	-4.23125	0.007	0.102	1.58517239535002e-53	0.icl2	Fasl
Txn1	9.82227137739437e-58	-1.13087	0.476	0.656	1.62558591295877e-53	0.icl2	Txn1
Cd81	1.02453497617628e-57	-3.72242	0.016	0.12	1.69560538557174e-53	0.icl2	Cd81
Serpinb9	1.85199381758597e-57	-3.31643	0.04	0.159	3.06504976810478e-53	0.icl2	Serpinb9
Mta3	2.03919469665978e-57	0.844063	0.533	0.419	3.37486722297193e-53	0.icl2	Mta3
Trf	2.29776512918679e-57	-3.90163	0.008	0.104	3.80280128880413e-53	0.icl2	Trf
Crybg1	2.96621251337345e-57	-1.54291	0.1	0.253	4.90908170963306e-53	0.icl2	Crybg1
Slc25a24	3.27918967706245e-57	-2.10848	0.031	0.148	5.42705891553835e-53	0.icl2	Slc25a24
Lrrk2	4.42110143461543e-57	-7.69043	0.001	0.089	7.31692287428853e-53	0.icl2	Lrrk2
Clec7a	6.34983301325585e-57	-7.20643	0.002	0.091	1.05089736369384e-52	0.icl2	Clec7a
Itm2b	6.78645442610227e-57	-0.642128	0.933	0.887	1.12315820751993e-52	0.icl2	Itm2b
Cd52	7.14288545736111e-57	0.277122	0.993	0.912	1.18214754319326e-52	0.icl2	Cd52
Fcgr3	7.16505687210143e-57	-5.17577	0.004	0.094	1.18581691233279e-52	0.icl2	Fcgr3
Sbf2	7.8763178574696e-57	-2.533	0.033	0.151	1.30353060541122e-52	0.icl2	Sbf2
Zdhhc15	8.88720912971244e-57	1.55886	0.221	0.099	1.47083311096741e-52	0.icl2	Zdhhc15
Maff	1.01532559143179e-56	-2.50518	0.032	0.148	1.68036385381961e-52	0.icl2	Maff
Hsph1	1.14338445502665e-56	0.570925	0.76	0.622	1.8923012730691e-52	0.icl2	Hsph1
Aldh2	2.016441474458e-56	-2.54328	0.03	0.144	3.337210640228e-52	0.icl2	Aldh2
Or13a27	2.02171483616939e-56	-9.13801	0	0.085	3.34593805386034e-52	0.icl2	Or13a27
Pkib	2.04804541639981e-56	-6.21384	0.003	0.091	3.38951516414169e-52	0.icl2	Pkib
Ifng	2.79458299471024e-56	-2.51333	0.05	0.175	4.62503485624545e-52	0.icl2	Ifng
Cd68	3.23042080618887e-56	-3.92464	0.006	0.1	5.34634643424258e-52	0.icl2	Cd68
Lrrc25	3.3093027527871e-56	-7.17884	0.001	0.087	5.47689605586266e-52	0.icl2	Lrrc25
Pkig	3.3479422987427e-56	-2.80338	0.02	0.127	5.54084450441916e-52	0.icl2	Pkig
Rel	5.24037618379303e-56	-1.2609	0.403	0.568	8.67282258417746e-52	0.icl2	Rel
Fgd2	5.99789550402937e-56	-6.03078	0.003	0.091	9.92651705916861e-52	0.icl2	Fgd2
Ctla2a	9.62271268423956e-56	-1.57553	0.163	0.32	1.59255894924165e-51	0.icl2	Ctla2a
Bcl2l11	9.69503078389942e-56	-1.40148	0.159	0.324	1.60452759473535e-51	0.icl2	Bcl2l11
Cacna1e	9.70380203439493e-56	-6.604	0.002	0.089	1.60597923669236e-51	0.icl2	Cacna1e
Tspo	1.34940557317052e-55	-0.643541	0.675	0.766	2.23326622359721e-51	0.icl2	Tspo
Icos	1.43422764073205e-55	-1.77435	0.11	0.258	2.37364674541154e-51	0.icl2	Icos
Nlk	1.50558083737156e-55	0.855803	0.469	0.335	2.49173628584994e-51	0.icl2	Nlk
Arhgap17	1.78137353063167e-55	-1.03676	0.264	0.454	2.94817319319542e-51	0.icl2	Arhgap17
Wdfy2	2.13228761633382e-55	-1.59508	0.069	0.207	3.52893600503247e-51	0.icl2	Wdfy2
Tns3	3.21367498295597e-55	-4.79903	0.006	0.096	5.31863209679213e-51	0.icl2	Tns3
Zdhhc2	3.53544021335912e-55	-3.18896	0.013	0.112	5.85115355310935e-51	0.icl2	Zdhhc2
Hdac4	6.64840246271203e-55	0.799617	0.443	0.306	1.10031060757884e-50	0.icl2	Hdac4
Srpk1	1.04122263435403e-54	0.740426	0.517	0.401	1.72322345985591e-50	0.icl2	Srpk1
Acot9	1.19411479310306e-54	-1.53864	0.069	0.207	1.97625998258557e-50	0.icl2	Acot9
Tnfaip3	1.648068758156e-54	-0.878214	0.532	0.682	2.72755379474819e-50	0.icl2	Tnfaip3
Irs2	1.98472367018706e-54	-1.56169	0.1	0.247	3.28471767415959e-50	0.icl2	Irs2
Pik3cb	2.03682088904544e-54	-2.30584	0.046	0.169	3.37093857137021e-50	0.icl2	Pik3cb
Acot7	2.16270577327091e-54	-1.921	0.035	0.151	3.57927805476335e-50	0.icl2	Acot7
Lyz2	2.5450208408194e-54	-6.1366	0.053	0.173	4.2120094915561e-50	0.icl2	Lyz2
Il12rb2	3.50465972758265e-54	-2.4261	0.065	0.192	5.80021184914929e-50	0.icl2	Il12rb2
Cxcl2	3.60910109677703e-54	-5.9319	0.01	0.104	5.97306231516598e-50	0.icl2	Cxcl2
Agap1	6.95455831749032e-54	-5.14161	0.005	0.093	1.15097940154465e-49	0.icl2	Agap1
Acvr2a	2.39906840903959e-53	-1.34401	0.114	0.266	3.97045821696052e-49	0.icl2	Acvr2a
Nptn	2.45149813545401e-53	-0.750785	0.417	0.608	4.05722941417639e-49	0.icl2	Nptn
Ssh2	2.63220552138504e-53	0.503728	0.784	0.68	4.35630013789223e-49	0.icl2	Ssh2
Tbc1d9	2.67649289089322e-53	-5.92003	0.004	0.089	4.42959573442828e-49	0.icl2	Tbc1d9
Scimp	2.87270511178352e-53	-4.32298	0.005	0.092	4.75432696000173e-49	0.icl2	Scimp
Klra4	2.89247135218296e-53	-7.78269	0.004	0.088	4.7870400878628e-49	0.icl2	Klra4
Gzmb	2.97650963868705e-53	-6.06663	0.008	0.098	4.92612345202706e-49	0.icl2	Gzmb
Ptprc	3.99733466371227e-53	0.225504	0.988	0.931	6.6155888684438e-49	0.icl2	Ptprc
Slc22a15	5.68831531706344e-53	-4.00766	0.006	0.095	9.41416184974e-49	0.icl2	Slc22a15
Cdon	1.19564839532668e-52	-1.88955	0.056	0.18	1.97879809426565e-48	0.icl2	Cdon
Rpl27a	1.40181232521827e-52	0.244645	0.996	0.938	2.31999939823624e-48	0.icl2	Rpl27a
Sesn3	1.43655178038876e-52	0.855923	0.517	0.401	2.37749319654339e-48	0.icl2	Sesn3
P4ha1	1.43883280300056e-52	1.02381	0.458	0.33	2.38126828896593e-48	0.icl2	P4ha1
Tubb5	2.37176063240271e-52	0.632986	0.599	0.496	3.92526384662649e-48	0.icl2	Tubb5
Fuca1	2.67627693781867e-52	-1.37479	0.145	0.309	4.4292383320899e-48	0.icl2	Fuca1
Mapk6	3.04276639026489e-52	-1.07159	0.238	0.417	5.0357783758884e-48	0.icl2	Mapk6
Arhgap18	4.14997719607825e-52	-1.07246	0.168	0.338	6.8682122595095e-48	0.icl2	Arhgap18
Pard3b	4.23543189190467e-52	-5.32615	0.004	0.087	7.00963978110222e-48	0.icl2	Pard3b
Iigp1	4.89826172020283e-52	2.29151	0.111	0.029	8.10662314693568e-48	0.icl2	Iigp1
Ttn	5.01112522207117e-52	-8.47385	0.003	0.086	8.29341224252779e-48	0.icl2	Ttn
Gna13	5.22003983244695e-52	-0.925576	0.345	0.532	8.6391659226997e-48	0.icl2	Gna13
Selenow	8.01327560063152e-52	0.442535	0.823	0.735	1.32619711190452e-47	0.icl2	Selenow
Arhgap21	9.04913035256419e-52	-1.51898	0.063	0.192	1.49763107334937e-47	0.icl2	Arhgap21
Cd80	9.16639243510111e-52	-5.11667	0.006	0.092	1.51703794800923e-47	0.icl2	Cd80
Rnase4	1.00373566510661e-51	-5.23764	0.002	0.083	1.66118252575144e-47	0.icl2	Rnase4
Nr3c2	1.03557214411661e-51	-2.60315	0.021	0.12	1.71387189851298e-47	0.icl2	Nr3c2
Stat1	1.11964173434269e-51	0.893655	0.487	0.366	1.85300707033715e-47	0.icl2	Stat1
Coro2a	1.17719433113223e-51	-0.827597	0.224	0.408	1.94825661802384e-47	0.icl2	Coro2a
Crlf3	1.55596799107214e-51	0.631687	0.663	0.575	2.5751270252244e-47	0.icl2	Crlf3
Gns	1.60238825226697e-51	-1.55648	0.079	0.215	2.65195255750184e-47	0.icl2	Gns
Dapk2	1.68456966468311e-51	-3.99793	0.003	0.085	2.78796279505055e-47	0.icl2	Dapk2
Il1r2	1.77349373215445e-51	-7.77753	0.003	0.084	2.93513212671561e-47	0.icl2	Il1r2
Itsn1	1.90401724620293e-51	-2.50474	0.018	0.115	3.15114854246585e-47	0.icl2	Itsn1
Cdc42ep3	2.31269404923609e-51	-0.918767	0.233	0.419	3.82750865148573e-47	0.icl2	Cdc42ep3
Cass4	2.89129046550111e-51	-3.32899	0.018	0.115	4.78508572040434e-47	0.icl2	Cass4
Rpl13a	2.89729379399125e-51	0.433375	0.805	0.713	4.79502122905552e-47	0.icl2	Rpl13a
Fam110a	3.24264867207657e-51	-2.35532	0.021	0.121	5.36658355228672e-47	0.icl2	Fam110a
Sqstm1	3.24801850613455e-51	-0.961294	0.569	0.69	5.37547062765269e-47	0.icl2	Sqstm1
Ly6c1	3.72780188230196e-51	4.22563	0.066	0.008	6.16951211520975e-47	0.icl2	Ly6c1
Rhobtb1	4.31661510929085e-51	-6.18125	0.001	0.079	7.14399800587636e-47	0.icl2	Rhobtb1
Adamts14	4.58531187500278e-51	-3.69036	0.009	0.097	7.58869115312959e-47	0.icl2	Adamts14
Oprm1	5.27378184415756e-51	1.06026	0.311	0.181	8.72810895208076e-47	0.icl2	Oprm1
Nek6	6.24695807232698e-51	-4.85668	0.003	0.085	1.03387156097012e-46	0.icl2	Nek6
Trim36	1.08169939148662e-50	-2.31695	0.019	0.117	1.79021249291036e-46	0.icl2	Trim36
Cers4	1.10716944402074e-50	-1.28947	0.103	0.248	1.83236542985433e-46	0.icl2	Cers4
Tpi1	1.18680720468164e-50	-0.943309	0.127	0.286	1.96416592374811e-46	0.icl2	Tpi1
Casp4	1.48468626228197e-50	-1.57113	0.071	0.201	2.45715576407666e-46	0.icl2	Casp4
Rpl41	1.50659927940445e-50	0.212014	0.997	0.947	2.49342180741436e-46	0.icl2	Rpl41
Chsy1	1.56361857899496e-50	-1.23659	0.185	0.346	2.58778874823667e-46	0.icl2	Chsy1
Cryba4	2.08196175203871e-50	-7.19774	0	0.077	3.44564669962406e-46	0.icl2	Cryba4
Mreg	2.63527020013762e-50	-7.27944	0.002	0.081	4.36137218122776e-46	0.icl2	Mreg
Ninj1	2.7309193935496e-50	-2.21907	0.041	0.153	4.51967159632459e-46	0.icl2	Ninj1
Map4k5	2.73661692178088e-50	-2.34984	0.021	0.119	4.52910100554735e-46	0.icl2	Map4k5
Themis2	3.58979180649385e-50	-4.86415	0.004	0.085	5.94110543974733e-46	0.icl2	Themis2
Ubash3b	4.07908826358409e-50	-1.00435	0.239	0.419	6.75089107623167e-46	0.icl2	Ubash3b
Lbh	4.20317170156469e-50	0.716101	0.53	0.425	6.95624916608956e-46	0.icl2	Lbh
Gsr	4.91750566610219e-50	-2.45991	0.116	0.259	8.13847187739912e-46	0.icl2	Gsr
Apoe	5.15432539320849e-50	-5.59593	0.022	0.119	8.53040852576005e-46	0.icl2	Apoe
Tnfrsf25	5.86664964132607e-50	-2.02339	0.029	0.133	9.70930515639465e-46	0.icl2	Tnfrsf25
Tmem154	6.05746981288335e-50	-1.41125	0.072	0.201	1.0025112540322e-45	0.icl2	Tmem154
Rnf157	6.12597940191019e-50	-1.66815	0.105	0.245	1.01384959101614e-45	0.icl2	Rnf157
Nfkbie	6.8805387444634e-50	-1.51054	0.141	0.296	1.13872916220869e-45	0.icl2	Nfkbie
Gpr137b	6.93888094012618e-50	-4.8172	0.003	0.083	1.14838479559088e-45	0.icl2	Gpr137b
Smad3	7.99977248346269e-50	-0.93775	0.245	0.423	1.32396234601307e-45	0.icl2	Smad3
Comt	9.85049511641971e-50	-1.3987	0.085	0.22	1.63025694176746e-45	0.icl2	Comt
Mcemp1	1.3567175305933e-49	-5.94278	0.002	0.08	2.2453675131319e-45	0.icl2	Mcemp1
Rubcnl	1.3933983257743e-49	-4.10802	0.005	0.087	2.30607422915647e-45	0.icl2	Rubcnl
Cadm1	1.4970083191287e-49	-7.80685	0.002	0.079	2.477548768158e-45	0.icl2	Cadm1
Card19	1.50096485071202e-49	-1.11442	0.131	0.287	2.4840968279284e-45	0.icl2	Card19
Stx7	1.61970175878272e-49	-1.47331	0.089	0.225	2.6806064107854e-45	0.icl2	Stx7
Swt1	1.72719070362686e-49	0.810694	0.51	0.402	2.85850061450246e-45	0.icl2	Swt1
Mapre2	1.81554687731628e-49	-0.890389	0.294	0.479	3.00473008195845e-45	0.icl2	Mapre2
Tmem51	1.85598415612683e-49	-4.94589	0.003	0.082	3.0716537783899e-45	0.icl2	Tmem51
Ccl6	2.2295381591693e-49	-7.39656	0.003	0.082	3.68988565342518e-45	0.icl2	Ccl6
Ifitm3	2.27248759169225e-49	-5.50831	0.013	0.102	3.76096696425067e-45	0.icl2	Ifitm3
Patj	2.64866701192924e-49	1.23248	0.257	0.135	4.38354390474289e-45	0.icl2	Patj
Sec11c	2.72443994595135e-49	-0.723468	0.497	0.651	4.50894811054949e-45	0.icl2	Sec11c
Cebpd	2.88954888036154e-49	-4.86149	0.005	0.086	4.78220339699836e-45	0.icl2	Cebpd
Aif1	3.33635661083757e-49	-5.75308	0.004	0.084	5.52167019093617e-45	0.icl2	Aif1
Tmem123	3.59934790776975e-49	-1.28802	0.256	0.441	5.95692078735893e-45	0.icl2	Tmem123
St8sia4	3.73087307869479e-49	-1.05726	0.323	0.496	6.17459494523988e-45	0.icl2	St8sia4
Zfp36l1	3.76968126258624e-49	-0.80195	0.48	0.636	6.23882248958022e-45	0.icl2	Zfp36l1
Vegfa	4.43898501311066e-49	-4.63048	0.01	0.095	7.34652019669814e-45	0.icl2	Vegfa
Jazf1	4.77248957974989e-49	-2.74464	0.014	0.104	7.89847025448607e-45	0.icl2	Jazf1
Prcp	4.89972065370235e-49	-1.61742	0.068	0.195	8.10903768187738e-45	0.icl2	Prcp
Pfkp	5.57613729958284e-49	-1.0662	0.231	0.404	9.22850723080959e-45	0.icl2	Pfkp
Rflnb	5.88213301368264e-49	1.7506	0.182	0.078	9.73493013764477e-45	0.icl2	Rflnb
Eif4e3	6.81683013420373e-49	-2.04707	0.03	0.133	1.12818538721072e-44	0.icl2	Eif4e3
Bcl2l1	6.90393045276686e-49	-1.82371	0.047	0.162	1.14260048993291e-44	0.icl2	Bcl2l1
Mndal	1.00420680833633e-48	0.478431	0.719	0.619	1.66196226779662e-44	0.icl2	Mndal
Tax1bp1	1.01775821150854e-48	-0.601622	0.529	0.702	1.68438984004663e-44	0.icl2	Tax1bp1
Eif4ebp1	1.02220904589095e-48	-2.16011	0.023	0.122	1.69175597094952e-44	0.icl2	Eif4ebp1
Nfam1	1.05781995850712e-48	-3.09011	0.018	0.11	1.75069203132929e-44	0.icl2	Nfam1
Adcy7	1.06193770627509e-48	0.763508	0.508	0.401	1.75750690388528e-44	0.icl2	Adcy7
Adam23	1.19232111929253e-48	-6.57949	0.006	0.086	1.97329145242914e-44	0.icl2	Adam23
Tgfbi	1.29868218959677e-48	-6.03301	0.003	0.08	2.14931902378266e-44	0.icl2	Tgfbi
Ctsz	1.37836440084926e-48	-1.5782	0.179	0.33	2.28119308340553e-44	0.icl2	Ctsz
Rpl36a	1.40459183754006e-48	0.283152	0.985	0.874	2.32459949112879e-44	0.icl2	Rpl36a
Blnk	1.42997320330222e-48	-5.88283	0.003	0.081	2.36660565146518e-44	0.icl2	Blnk
Smyd2	1.50375979148883e-48	-2.33057	0.021	0.116	2.48872245491402e-44	0.icl2	Smyd2
Eomes	1.56482252198177e-48	-2.18338	0.058	0.174	2.58978127387983e-44	0.icl2	Eomes
Lilrb4a	1.67149756741274e-48	-4.37749	0.007	0.089	2.76632847406808e-44	0.icl2	Lilrb4a
Tmed3	1.70469661699133e-48	-1.21787	0.089	0.228	2.82127290112066e-44	0.icl2	Tmed3
Lypd6b	2.05835505539733e-48	1.70993	0.121	0.037	3.40657761668258e-44	0.icl2	Lypd6b
Igsf6	2.56860943233251e-48	-5.55943	0.004	0.081	4.2510486105103e-44	0.icl2	Igsf6
Il6ra	3.11477905785083e-48	0.84454	0.292	0.163	5.15495934074313e-44	0.icl2	Il6ra
Mctp1	3.46203797822783e-48	-2.72319	0.042	0.15	5.72967285396705e-44	0.icl2	Mctp1
Atp6v0b	3.68116744343341e-48	-0.887499	0.278	0.463	6.09233211888229e-44	0.icl2	Atp6v0b
Ehbp1l1	3.75799355937779e-48	-1.87289	0.047	0.162	6.21947934077025e-44	0.icl2	Ehbp1l1
Tmem71	4.11300709706066e-48	0.825259	0.438	0.311	6.80702674563539e-44	0.icl2	Tmem71
Plscr1	4.41704801127988e-48	-2.20003	0.036	0.142	7.3102144586682e-44	0.icl2	Plscr1
Uba52	7.63974982315293e-48	0.278754	0.992	0.891	1.26437859573181e-43	0.icl2	Uba52
Rabgap1l	7.94760309933161e-48	-0.833005	0.641	0.742	1.31532831293938e-43	0.icl2	Rabgap1l
Tnfrsf9	1.03052930947459e-47	-2.13856	0.045	0.155	1.70552600718044e-43	0.icl2	Tnfrsf9
Ubl3	1.03929604838331e-47	-0.899684	0.292	0.467	1.72003496007437e-43	0.icl2	Ubl3
Plcxd2	1.07325997285975e-47	1.23041	0.306	0.182	1.77624525508288e-43	0.icl2	Plcxd2
Ptpro	1.23993688174045e-47	-7.01754	0.001	0.075	2.05209553928045e-43	0.icl2	Ptpro
Btk	1.6168006207086e-47	-5.15842	0.003	0.079	2.67580502727274e-43	0.icl2	Btk
Nucb2	1.62915108616131e-47	-2.85969	0.017	0.107	2.69624504759697e-43	0.icl2	Nucb2
Lst1	2.45169264431293e-47	-3.31313	0.061	0.174	4.0575513263379e-43	0.icl2	Lst1
Plin2	2.64574447445995e-47	-2.0004	0.051	0.164	4.37870710523122e-43	0.icl2	Plin2
Csrnp1	3.84563432351724e-47	-1.893	0.053	0.168	6.36452480542102e-43	0.icl2	Csrnp1
BC035044	4.08942578526211e-47	-2.09333	0.029	0.129	6.7679996746088e-43	0.icl2	BC035044
Ttc39c	5.31089162046662e-47	-4.22063	0.004	0.08	8.78952563187225e-43	0.icl2	Ttc39c
H2-DMb2	6.96943748315355e-47	-5.65627	0.002	0.076	1.15344190346191e-42	0.icl2	H2-DMb2
Arrb1	8.88449917231487e-47	-1.5252	0.066	0.188	1.47038461301811e-42	0.icl2	Arrb1
Nedd4	9.35739518266625e-47	-1.22406	0.138	0.289	1.54864890273126e-42	0.icl2	Nedd4
Vav2	1.35804640267341e-46	-2.69567	0.022	0.116	2.2475667964245e-42	0.icl2	Vav2
Cntn1	1.60691209025571e-46	-7.72976	0.001	0.073	2.6594395093732e-42	0.icl2	Cntn1
Tnf	1.77770091794306e-46	-1.41867	0.105	0.242	2.94209501919576e-42	0.icl2	Tnf
Adap1	1.834431472458e-46	-4.0209	0.008	0.088	3.03598408691799e-42	0.icl2	Adap1
Klf10	1.85924444024184e-46	-1.15426	0.115	0.257	3.07704954860024e-42	0.icl2	Klf10
Emilin2	2.63994152931203e-46	-6.42332	0.002	0.075	4.36910323101141e-42	0.icl2	Emilin2
Thada	2.75993924162427e-46	0.680174	0.533	0.418	4.56769944488816e-42	0.icl2	Thada
Cyp4f18	2.81453783424028e-46	-6.10161	0.002	0.075	4.65806011566767e-42	0.icl2	Cyp4f18
Krt83	3.69123081938639e-46	-5.71268	0	0.071	6.10898700608447e-42	0.icl2	Krt83
Mthfsl	3.78675453206533e-46	-1.30041	0.068	0.192	6.26707875056812e-42	0.icl2	Mthfsl
Gzma	3.79137403163723e-46	-6.02279	0.06	0.167	6.27472402235962e-42	0.icl2	Gzma
Slc16a5	5.02385112013434e-46	3.00306	0.07	0.012	8.31447360382233e-42	0.icl2	Slc16a5
Tiam2	5.47889128419633e-46	-4.55512	0.004	0.079	9.06756507534493e-42	0.icl2	Tiam2
Sgpl1	6.45657406721067e-46	-1.30112	0.1	0.239	1.06856300812337e-41	0.icl2	Sgpl1
Arl4d	7.58238100968609e-46	-2.94755	0.018	0.107	1.25488405710305e-41	0.icl2	Arl4d
Nrgn	7.5917117406595e-46	-3.75911	0.009	0.09	1.25642829307915e-41	0.icl2	Nrgn
Lgmn	8.6167885303232e-46	-4.15668	0.007	0.085	1.42607850176849e-41	0.icl2	Lgmn
Dst	9.73120409745531e-46	-2.4055	0.033	0.133	1.61051427812885e-41	0.icl2	Dst
Klra9	1.07053788356454e-45	-8.69912	0	0.07	1.77174019729932e-41	0.icl2	Klra9
Ikzf2	1.52509043230072e-45	0.673093	0.613	0.49	2.52402466545769e-41	0.icl2	Ikzf2
Galnt6	1.64056974356884e-45	1.0932	0.307	0.189	2.71514292560643e-41	0.icl2	Galnt6
Cnnm2	2.98676752808525e-45	-2.02189	0.042	0.146	4.94310025898109e-41	0.icl2	Cnnm2
Eepd1	3.16424387668206e-45	-4.68307	0.005	0.079	5.23682361590881e-41	0.icl2	Eepd1
Ext1	3.35992806891966e-45	0.4758	0.504	0.364	5.56068095406204e-41	0.icl2	Ext1
Olfm1	4.19065274016825e-45	-8.74433	0	0.068	6.93553028497845e-41	0.icl2	Olfm1
Prkcb	4.39093159994099e-45	0.378903	0.666	0.509	7.26699179790233e-41	0.icl2	Prkcb
Rpl38	4.67885136518926e-45	0.237419	0.996	0.927	7.74349900938823e-41	0.icl2	Rpl38
Cdc42bpb	4.99746019555398e-45	-6.08118	0.001	0.071	8.27079662364184e-41	0.icl2	Cdc42bpb
Pak1	5.2061023485805e-45	-3.43684	0.021	0.11	8.61609938690073e-41	0.icl2	Pak1
Itpkb	8.24202100248934e-45	0.490414	0.645	0.537	1.36405447591199e-40	0.icl2	Itpkb
Gimap5	8.27717723347113e-45	0.569678	0.523	0.385	1.36987283213947e-40	0.icl2	Gimap5
Jag1	8.74619598865931e-45	-5.88751	0.001	0.071	1.44749543612312e-40	0.icl2	Jag1
Rps27l	1.1657350744011e-44	-0.813249	0.264	0.442	1.92929154813382e-40	0.icl2	Rps27l
Crmp1	1.37126497574035e-44	-6.2981	0.001	0.07	2.26944353485028e-40	0.icl2	Crmp1
Gda	1.42675465516992e-44	-7.19566	0.001	0.071	2.36127895430621e-40	0.icl2	Gda
Jdp2	1.98337234251894e-44	-4.87747	0.008	0.085	3.28248122686885e-40	0.icl2	Jdp2
Ppfia4	2.22312419248582e-44	-6.0428	0	0.068	3.67927053856404e-40	0.icl2	Ppfia4
Gramd4	2.26181018234435e-44	0.817045	0.395	0.277	3.74329585177989e-40	0.icl2	Gramd4
Psen2	2.65608365634979e-44	-1.0887	0.095	0.228	4.39581845125891e-40	0.icl2	Psen2
Kbtbd11	2.7257320723807e-44	0.88328	0.385	0.27	4.51108657979005e-40	0.icl2	Kbtbd11
Ppp2r5a	2.72767600181445e-44	0.499984	0.642	0.552	4.51430378300291e-40	0.icl2	Ppp2r5a
Rpl27	3.59779600899195e-44	0.235772	0.996	0.92	5.95435239488167e-40	0.icl2	Rpl27
Ppfibp2	3.62945179354093e-44	-6.07103	0.002	0.072	6.00674271831024e-40	0.icl2	Ppfibp2
Atp10a	3.87604613082051e-44	-1.19873	0.103	0.236	6.41485634650795e-40	0.icl2	Atp10a
Arntl	4.24058492569632e-44	-1.11572	0.11	0.247	7.01816805202742e-40	0.icl2	Arntl
Jak2	5.48784242840953e-44	-1.50612	0.255	0.41	9.08237921901777e-40	0.icl2	Jak2
Pla2g7	5.96353700512588e-44	-7.33632	0.001	0.07	9.86965374348333e-40	0.icl2	Pla2g7
mt-Co1	6.69732076828672e-44	-0.707669	1	0.984	1.10840658715145e-39	0.icl2	mt-Co1
Adssl1	7.83037219836901e-44	-3.1377	0.008	0.085	1.29592659883007e-39	0.icl2	Adssl1
Pi4k2a	8.71587068723791e-44	-1.20986	0.14	0.286	1.44247659873787e-39	0.icl2	Pi4k2a
Hivep2	1.06260108372002e-43	0.383199	0.709	0.58	1.75860479355663e-39	0.icl2	Hivep2
Cacnb2	1.06944795370246e-43	-5.85074	0.003	0.073	1.76993636337757e-39	0.icl2	Cacnb2
Fnip2	1.07520993275649e-43	-4.1167	0.005	0.078	1.77947243871199e-39	0.icl2	Fnip2
Naip5	1.14288331726845e-43	-4.14253	0.004	0.075	1.89147189007929e-39	0.icl2	Naip5
Crybg3	1.18520843944791e-43	-2.9065	0.014	0.095	1.96151996728629e-39	0.icl2	Crybg3
Hspa1b	1.33570124868443e-43	0.376913	0.831	0.703	2.21058556657273e-39	0.icl2	Hspa1b
Gpr132	1.61463222964599e-43	-1.018	0.363	0.528	2.67221634006412e-39	0.icl2	Gpr132
Dipk1a	1.69541059615641e-43	0.785455	0.468	0.363	2.80590453663885e-39	0.icl2	Dipk1a
Dock11	2.00320425306676e-43	0.498321	0.662	0.577	3.31530303882549e-39	0.icl2	Dock11
Rgs2	2.11160751903253e-43	-0.892888	0.39	0.547	3.49471044399883e-39	0.icl2	Rgs2
Pim3	2.31594981893399e-43	-2.16146	0.04	0.141	3.83289695033576e-39	0.icl2	Pim3
Ddx5	2.3505049756762e-43	-0.316704	0.963	0.955	3.8900857347441e-39	0.icl2	Ddx5
Sp100	2.39910746923407e-43	0.448855	0.694	0.615	3.97052286158238e-39	0.icl2	Sp100
Cyp27a1	3.24013662204902e-43	-7.60706	0.001	0.067	5.36242610949112e-39	0.icl2	Cyp27a1
Dph5	3.48242668688254e-43	1.1332	0.288	0.177	5.76341616679061e-39	0.icl2	Dph5
Fcgr2b	3.53880021887505e-43	-5.44169	0.002	0.07	5.85671436223821e-39	0.icl2	Fcgr2b
Spred2	3.82868951636194e-43	1.14192	0.293	0.179	6.33648114957901e-39	0.icl2	Spred2
Sh3glb1	3.83548841190855e-43	-0.638955	0.408	0.599	6.34773332170864e-39	0.icl2	Sh3glb1
Prdx4	3.84101175276265e-43	-2.16895	0.02	0.107	6.35687445082218e-39	0.icl2	Prdx4
Cxcl16	4.24776860201879e-43	-6.2431	0.002	0.07	7.03005703634111e-39	0.icl2	Cxcl16
Chn2	4.3173606450279e-43	-1.16688	0.156	0.296	7.14523186752117e-39	0.icl2	Chn2
Marcksl1	4.70488809001684e-43	-2.97408	0.027	0.117	7.78658978897787e-39	0.icl2	Marcksl1
Cldnd1	5.00300787471165e-43	-1.17093	0.091	0.219	8.27997803264778e-39	0.icl2	Cldnd1
Smim3	5.72484518150162e-43	-2.25625	0.024	0.113	9.47461877538518e-39	0.icl2	Smim3
Csf3r	5.76691513533846e-43	-7.16066	0.004	0.073	9.54424454898516e-39	0.icl2	Csf3r
Asap2	5.8268848253557e-43	-2.49681	0.032	0.127	9.64349438596368e-39	0.icl2	Asap2
Tank	5.83469809146886e-43	-1.22934	0.256	0.413	9.65642534138097e-39	0.icl2	Tank
Cnr2	6.24583910076935e-43	-2.01183	0.036	0.134	1.03368637117733e-38	0.icl2	Cnr2
Ankrd44	1.08306545445546e-42	0.310871	0.923	0.859	1.79247332712379e-38	0.icl2	Ankrd44
Tnrc6c	1.22326039467255e-42	0.514403	0.619	0.53	2.02449595318307e-38	0.icl2	Tnrc6c
Ier5	1.35216385047825e-42	-0.578555	0.535	0.697	2.2378311725415e-38	0.icl2	Ier5
Srpk2	1.39769289460689e-42	0.53835	0.61	0.519	2.31318174057441e-38	0.icl2	Srpk2
Calcrl	1.72842170879156e-42	1.12289	0.316	0.201	2.86053792805004e-38	0.icl2	Calcrl
Bmp7	2.12271831683161e-42	-3.70522	0.005	0.076	3.51309881435631e-38	0.icl2	Bmp7
Carmil1	2.62250858604463e-42	-5.57157	0.002	0.069	4.34025170990386e-38	0.icl2	Carmil1
Vegfc	2.65153629427059e-42	-5.43039	0.002	0.068	4.38829256701782e-38	0.icl2	Vegfc
Hnrnpa0	2.73932129879816e-42	0.405989	0.778	0.707	4.53357674951096e-38	0.icl2	Hnrnpa0
Ramp3	2.83969942146139e-42	-2.61389	0.03	0.121	4.69970254251859e-38	0.icl2	Ramp3
Nlrp3	3.14796190700835e-42	-6.7933	0.002	0.068	5.20987695609881e-38	0.icl2	Nlrp3
Lmo2	3.32655851074056e-42	-4.18737	0.003	0.071	5.50545433527562e-38	0.icl2	Lmo2
Epb41l2	3.38217836824386e-42	-0.967402	0.185	0.341	5.59750519944358e-38	0.icl2	Epb41l2
Pde4d	3.41279994251132e-42	0.476561	0.36	0.23	5.64818390485624e-38	0.icl2	Pde4d
Bik	3.67096483129627e-42	-4.53988	0.002	0.069	6.07544679579532e-38	0.icl2	Bik
Plekhg3	4.07571539806188e-42	-2.76919	0.015	0.096	6.7453089837924e-38	0.icl2	Plekhg3
Fosb	4.22123343421549e-42	-0.835899	0.606	0.686	6.98614133362664e-38	0.icl2	Fosb
Rnd3	5.77738828922197e-42	-5.19354	0.004	0.073	9.56157761866237e-38	0.icl2	Rnd3
Pde4a	6.32755441191971e-42	-5.68585	0.002	0.068	1.04721025517271e-37	0.icl2	Pde4a
Cpe	7.22364309477924e-42	-5.50378	0.001	0.066	1.19551293218596e-37	0.icl2	Cpe
Zyx	7.60662975011938e-42	-0.805554	0.278	0.448	1.25889722364476e-37	0.icl2	Zyx
Ccnd1	9.84009490471856e-42	-4.29136	0.006	0.076	1.62853570673092e-37	0.icl2	Ccnd1
Ptafr	1.0805002536655e-41	-4.59556	0.003	0.07	1.78822791981641e-37	0.icl2	Ptafr
Yes1	1.14707195102042e-41	-3.72749	0.007	0.079	1.89840407893879e-37	0.icl2	Yes1
Scart1	1.15611735943664e-41	-3.31311	0.104	0.209	1.91337422986764e-37	0.icl2	Scart1
Afdn	1.4157632808211e-41	-2.87908	0.015	0.094	2.34308822975892e-37	0.icl2	Afdn
Rbpj	1.56160644333537e-41	-1.2834	0.17	0.319	2.58445866372003e-37	0.icl2	Rbpj
Selenop	1.60096342664212e-41	-1.18382	0.209	0.355	2.6495944710927e-37	0.icl2	Selenop
Asph	1.78580422988953e-41	-3.26439	0.014	0.092	2.95550600046718e-37	0.icl2	Asph
Zbtb7b	2.16075294220338e-41	-4.32459	0.003	0.069	3.57604611934659e-37	0.icl2	Zbtb7b
Gm21188	2.37377619859122e-41	-6.48503	0.002	0.067	3.92859960866848e-37	0.icl2	Gm21188
Vars	3.09036306454853e-41	-0.900698	0.115	0.255	5.11455087182781e-37	0.icl2	Vars
Rpl22	3.98561305772575e-41	0.246541	0.993	0.904	6.59618961053611e-37	0.icl2	Rpl22
Rgs10	4.04220797905817e-41	0.618109	0.501	0.381	6.68985420534126e-37	0.icl2	Rgs10
Ifi203	4.1030162431323e-41	0.531923	0.657	0.573	6.79049188238396e-37	0.icl2	Ifi203
Myh9	4.32674552688566e-41	0.31728	0.836	0.772	7.16076384699577e-37	0.icl2	Myh9
Snx9	4.33978320219217e-41	-1.54508	0.062	0.171	7.18234119962804e-37	0.icl2	Snx9
Hpcal1	5.20005909225212e-41	0.756018	0.446	0.337	8.60609779767726e-37	0.icl2	Hpcal1
Dusp3	5.474613745685e-41	-4.98733	0.002	0.066	9.06048574910868e-37	0.icl2	Dusp3
Pdlim1	6.0563889475901e-41	0.905596	0.372	0.267	1.00233237082616e-36	0.icl2	Pdlim1
Csf2rb2	6.11930325706186e-41	-7.09786	0.001	0.064	1.01274468904374e-36	0.icl2	Csf2rb2
Adam19	6.4235461869557e-41	-1.35398	0.109	0.236	1.06309689394117e-36	0.icl2	Adam19
Hp	7.03810229769932e-41	-9.29346	0	0.063	1.16480593026924e-36	0.icl2	Hp
Nr1d1	7.20773097544487e-41	-5.00248	0.002	0.066	1.19287947643613e-36	0.icl2	Nr1d1
Stk17b	8.20052980862996e-41	0.343305	0.88	0.798	1.35718768332826e-36	0.icl2	Stk17b
Klhdc1	9.08013195510417e-41	1.33255	0.219	0.117	1.50276183856974e-36	0.icl2	Klhdc1
Bri3	9.42922658233077e-41	-0.810902	0.267	0.437	1.56053699937574e-36	0.icl2	Bri3
Slc7a11	1.22241695166544e-40	-7.84963	0.001	0.065	2.0231000550063e-36	0.icl2	Slc7a11
Tgfb1	1.28593621615957e-40	-0.899711	0.242	0.406	2.1282244377441e-36	0.icl2	Tgfb1
Dgkh	1.3500647829187e-40	-2.59055	0.023	0.108	2.23435721573045e-36	0.icl2	Dgkh
Acsl1	1.36146858034396e-40	-1.94383	0.041	0.139	2.25323050046926e-36	0.icl2	Acsl1
Trpm6	1.52639703331004e-40	-6.28623	0.001	0.063	2.52618709012812e-36	0.icl2	Trpm6
Tdrd9	1.52825589029461e-40	-8.73332	0	0.061	2.52926349843759e-36	0.icl2	Tdrd9
Gdpd5	1.60471083347775e-40	-3.32455	0.008	0.078	2.65579642940568e-36	0.icl2	Gdpd5
Pmepa1	1.61282883296438e-40	1.05681	0.229	0.123	2.66923171855605e-36	0.icl2	Pmepa1
Setx	1.74227135546362e-40	0.806057	0.419	0.317	2.88345909329229e-36	0.icl2	Setx
Hivep1	1.97291462929638e-40	-1.07517	0.18	0.328	3.26517371148551e-36	0.icl2	Hivep1
Rpl3	2.02818049684803e-40	0.234332	0.994	0.902	3.35663872228349e-36	0.icl2	Rpl3
Mvp	2.36149488071499e-40	-1.76099	0.036	0.131	3.90827402758331e-36	0.icl2	Mvp
Pygl	2.71630591920678e-40	-4.08898	0.008	0.078	4.49548629628723e-36	0.icl2	Pygl
Ric1	2.78122105397182e-40	-0.972583	0.179	0.328	4.60292084432336e-36	0.icl2	Ric1
Rpl4	2.93208318286115e-40	0.287016	0.96	0.863	4.85259766763521e-36	0.icl2	Rpl4
Far1	3.50576623994123e-40	-0.918345	0.162	0.31	5.80204312710274e-36	0.icl2	Far1
Eps8	3.68217588801313e-40	-6.75148	0.001	0.063	6.09400109466174e-36	0.icl2	Eps8
Pde7b	3.70550524419597e-40	-4.05059	0.008	0.078	6.13261117914433e-36	0.icl2	Pde7b
Gna15	4.02512591514722e-40	-1.65682	0.041	0.138	6.66158338956864e-36	0.icl2	Gna15
Cpeb2	4.09203189313348e-40	-1.43728	0.09	0.211	6.77231278313592e-36	0.icl2	Cpeb2
Gab3	4.78976878597653e-40	-0.921391	0.213	0.363	7.92706734079116e-36	0.icl2	Gab3
Mpc1	5.36688357723497e-40	-0.703481	0.293	0.475	8.88219232032387e-36	0.icl2	Mpc1
B4galt5	5.72631260105262e-40	-1.10753	0.11	0.24	9.47704735474209e-36	0.icl2	B4galt5
Slc6a19	6.35177538883925e-40	3.17872	0.06	0.01	1.0512188268529e-35	0.icl2	Slc6a19
Rnf11	7.04401814995256e-40	-1.28459	0.076	0.192	1.16578500381715e-35	0.icl2	Rnf11
Ccr10	7.35783301306172e-40	-7.67736	0	0.061	1.21772136366171e-35	0.icl2	Ccr10
Nedd9	7.39761460952655e-40	0.439578	0.651	0.556	1.22430521787664e-35	0.icl2	Nedd9
Stambpl1	1.09595352826329e-39	0.98623	0.387	0.279	1.81380308927574e-35	0.icl2	Stambpl1
Ptprv	1.13996571237518e-39	-4.47223	0.003	0.068	1.88664325398093e-35	0.icl2	Ptprv
Rpl31	1.38087076529913e-39	0.22537	0.943	0.845	2.28534111657005e-35	0.icl2	Rpl31
Sav1	1.41813473346135e-39	-1.84647	0.038	0.133	2.34701298387853e-35	0.icl2	Sav1
Slc44a2	1.54047831013934e-39	0.683767	0.445	0.339	2.54949160328061e-35	0.icl2	Slc44a2
Xbp1	1.5842211342823e-39	-1.12564	0.103	0.229	2.62188597723721e-35	0.icl2	Xbp1
Cd63	1.84046000552641e-39	-5.36059	0.004	0.068	3.04596130914622e-35	0.icl2	Cd63
Mbnl1	2.00958908465113e-39	0.244825	0.981	0.913	3.32586993509761e-35	0.icl2	Mbnl1
Gpr141	2.087460848265e-39	-5.69433	0.003	0.065	3.45474770387858e-35	0.icl2	Gpr141
Hip1r	2.08775625184555e-39	-1.33558	0.072	0.185	3.45523659680439e-35	0.icl2	Hip1r
Znrf2	2.14093982833963e-39	0.613279	0.562	0.481	3.54325541590208e-35	0.icl2	Znrf2
Creg1	2.41117755670529e-39	-1.02375	0.119	0.253	3.99049885634725e-35	0.icl2	Creg1
Nucb1	2.62104157407834e-39	-0.843734	0.142	0.286	4.33782380509966e-35	0.icl2	Nucb1
I830077J02Rik	2.67758732064104e-39	-4.65088	0.002	0.065	4.43140701566093e-35	0.icl2	I830077J02Rik
Evi2a	3.31611842743629e-39	-1.21375	0.083	0.2	5.48817599740706e-35	0.icl2	Evi2a
Wdfy3	3.40626595811223e-39	-6.19713	0.001	0.063	5.63737016067573e-35	0.icl2	Wdfy3
Pdcd1lg2	3.54427510719664e-39	-1.71784	0.044	0.141	5.86577530241044e-35	0.icl2	Pdcd1lg2
Ncald	3.63429287666081e-39	-1.94071	0.036	0.127	6.01475471087365e-35	0.icl2	Ncald
Bcl7c	3.71244050113914e-39	-0.782735	0.139	0.283	6.14408902938528e-35	0.icl2	Bcl7c
Ahcyl2	4.24404218323868e-39	-0.777768	0.299	0.461	7.02388981326002e-35	0.icl2	Ahcyl2
Itprid2	4.60563582053479e-39	-1.9544	0.059	0.163	7.62232728298508e-35	0.icl2	Itprid2
Uhrf2	4.65685720164192e-39	-1.01583	0.285	0.44	7.70709866871737e-35	0.icl2	Uhrf2
Meis1	4.95821065203177e-39	-4.73278	0.004	0.067	8.20583862911258e-35	0.icl2	Meis1
Rbl2	4.97709818697603e-39	-0.897606	0.196	0.346	8.23709749944533e-35	0.icl2	Rbl2
Trpv2	5.44374879442189e-39	-1.02147	0.13	0.266	9.00940425476823e-35	0.icl2	Trpv2
Hdc	5.60563323518275e-39	-6.08602	0.008	0.075	9.27732300422746e-35	0.icl2	Hdc
C9orf72	6.02767706428617e-39	-1.82833	0.045	0.141	9.97580554139361e-35	0.icl2	C9orf72
Sh3bp5	6.29139100986559e-39	0.868219	0.363	0.251	1.04122521213276e-34	0.icl2	Sh3bp5
Siglecg	6.78286976669089e-39	-6.33874	0.001	0.061	1.12256494638734e-34	0.icl2	Siglecg
Mettl8	7.70919663614521e-39	1.59986	0.165	0.077	1.27587204328203e-34	0.icl2	Mettl8
Icosl	8.00940016136471e-39	-3.78041	0.01	0.081	1.32555572670586e-34	0.icl2	Icosl
Sh2d1b1	8.10996056793932e-39	-6.12431	0	0.06	1.34219847399396e-34	0.icl2	Sh2d1b1
Qrfp	8.24997428494355e-39	-2.82195	0.01	0.081	1.36537074415816e-34	0.icl2	Qrfp
Slc3a2	8.5105363403528e-39	-0.722139	0.363	0.531	1.40849376432839e-34	0.icl2	Slc3a2
Havcr2	1.13314368669541e-38	-7.43062	0.001	0.06	1.87535280148091e-34	0.icl2	Havcr2
Styk1	1.2269483633884e-38	-5.34144	0.003	0.066	2.0305995414078e-34	0.icl2	Styk1
Nr4a1	1.23373531267881e-38	-1.05247	0.216	0.358	2.04183194248342e-34	0.icl2	Nr4a1
Pstpip2	1.28968655471533e-38	-4.48278	0.004	0.068	2.13443124805387e-34	0.icl2	Pstpip2
Npl	1.32297221057513e-38	-5.87294	0.001	0.061	2.18951900850184e-34	0.icl2	Npl
Camk1d	1.44913021909328e-38	-0.976607	0.856	0.911	2.39831051259938e-34	0.icl2	Camk1d
Pgam1	1.73226136622916e-38	-0.741429	0.174	0.329	2.86689256110926e-34	0.icl2	Pgam1
Slc7a1	1.91070958541107e-38	-0.839973	0.226	0.382	3.16222436385531e-34	0.icl2	Slc7a1
Rapgef4	2.03247631881606e-38	1.11055	0.22	0.117	3.36374830764059e-34	0.icl2	Rapgef4
Stmp1	2.32786777705523e-38	-0.77637	0.366	0.528	3.85262117102641e-34	0.icl2	Stmp1
Cask	2.35947696878889e-38	-1.82029	0.056	0.157	3.90493438334562e-34	0.icl2	Cask
Hacd4	2.72572628254132e-38	-4.72569	0.003	0.065	4.51107699760589e-34	0.icl2	Hacd4
Mtcl1	3.68106984732471e-38	-6.53236	0.001	0.059	6.0921705973224e-34	0.icl2	Mtcl1
Frmd4b	3.97228688599681e-38	-1.73406	0.041	0.134	6.57413479632472e-34	0.icl2	Frmd4b
Rad51b	4.08969263319449e-38	-2.38272	0.022	0.102	6.76844130793688e-34	0.icl2	Rad51b
Psme2	4.72018788270736e-38	0.474937	0.64	0.567	7.81191094588068e-34	0.icl2	Psme2
Rcn3	4.75424143819698e-38	1.67426	0.165	0.077	7.86826958021599e-34	0.icl2	Rcn3
Sik3	4.87258143925307e-38	-0.760134	0.458	0.609	8.06412228196383e-34	0.icl2	Sik3
mt-Cytb	5.51781187794921e-38	-0.11437	0.999	0.965	9.13197865800594e-34	0.icl2	mt-Cytb
Il13ra1	5.69794080624669e-38	-6.08233	0.001	0.06	9.43009203433827e-34	0.icl2	Il13ra1
Prdm1	5.71956471131697e-38	-2.85063	0.014	0.086	9.46587959722959e-34	0.icl2	Prdm1
Apobec1	5.76000662040091e-38	-1.99971	0.058	0.158	9.53281095676351e-34	0.icl2	Apobec1
Naga	6.27329135848998e-38	-1.66603	0.047	0.144	1.03822971983009e-33	0.icl2	Naga
Cd86	6.3452276978412e-38	-2.90296	0.042	0.131	1.05013518399272e-33	0.icl2	Cd86
Anxa3	9.49199593126873e-38	-5.90915	0.003	0.064	1.57092532662497e-33	0.icl2	Anxa3
Dynlt2b	1.02162682217043e-37	-3.2468	0.01	0.078	1.69079239069206e-33	0.icl2	Dynlt2b
Impact	1.09348113073437e-37	-0.785442	0.29	0.449	1.80971127136538e-33	0.icl2	Impact
Mif4gd	1.14214920459193e-37	-1.01882	0.092	0.213	1.89025693359964e-33	0.icl2	Mif4gd
Cd4	1.22596080797541e-37	-3.9513	0.006	0.07	2.02896513719931e-33	0.icl2	Cd4
Rpl39	1.23810015241497e-37	0.209886	0.997	0.926	2.04905575224677e-33	0.icl2	Rpl39
Suco	1.3557081637645e-37	-0.80897	0.295	0.459	2.24369701103025e-33	0.icl2	Suco
Niban2	1.7601099474213e-37	-5.04752	0.002	0.061	2.91298196298225e-33	0.icl2	Niban2
Tns4	1.81701834598493e-37	-5.70841	0.001	0.059	3.00716536260507e-33	0.icl2	Tns4
Rgs18	1.95068483600299e-37	-2.52609	0.013	0.084	3.22838340358496e-33	0.icl2	Rgs18
Sptbn1	2.28570798046877e-37	0.586115	0.542	0.454	3.78284670767581e-33	0.icl2	Sptbn1
Rab31	2.33709752770238e-37	-2.69698	0.021	0.099	3.86789640834744e-33	0.icl2	Rab31
Kif1b	2.42538994653203e-37	-0.837302	0.209	0.359	4.0140203615105e-33	0.icl2	Kif1b
Nfic	2.42767644771893e-37	-1.16377	0.072	0.18	4.01780452097483e-33	0.icl2	Nfic
Csf1r	2.43373400986637e-37	-6.20165	0.001	0.06	4.02782978632884e-33	0.icl2	Csf1r
Rpl24	2.8470326245804e-37	0.228502	0.996	0.916	4.71183899368056e-33	0.icl2	Rpl24
Slc6a13	2.87594531210458e-37	-5.93114	0.001	0.058	4.75968949153308e-33	0.icl2	Slc6a13
Glud1	3.4816776468756e-37	-0.722334	0.326	0.493	5.76217650557912e-33	0.icl2	Glud1
Trim7	3.93440723685492e-37	-5.91898	0.002	0.06	6.51144397699489e-33	0.icl2	Trim7
Rgs1	4.08393386575238e-37	-0.904556	0.387	0.522	6.7589105478202e-33	0.icl2	Rgs1
Kcnk10	4.30167244025298e-37	-7.35076	0	0.057	7.11926788861869e-33	0.icl2	Kcnk10
Slc2a6	4.45244649365362e-37	-5.6708	0.001	0.059	7.36879894699674e-33	0.icl2	Slc2a6
Fnbp1	5.33703435130681e-37	-0.696163	0.647	0.751	8.83279185141277e-33	0.icl2	Fnbp1
Wfdc17	5.51865742640205e-37	-6.39934	0.003	0.063	9.13337804069539e-33	0.icl2	Wfdc17
Ptk2	5.57279030050842e-37	-2.24159	0.021	0.098	9.22296794734144e-33	0.icl2	Ptk2
Sema6d	5.64645052965047e-37	-5.54764	0.003	0.062	9.34487562657154e-33	0.icl2	Sema6d
Usp28	5.97732183531573e-37	1.4898	0.185	0.094	9.89246763744753e-33	0.icl2	Usp28
Tjp2	7.08599880658047e-37	-2.35688	0.023	0.101	1.17273280248907e-32	0.icl2	Tjp2
Phf20l1	7.26165777636449e-37	0.505023	0.659	0.607	1.20180436198832e-32	0.icl2	Phf20l1
Ifi27	7.66035851448622e-37	0.811874	0.437	0.344	1.26778933414747e-32	0.icl2	Ifi27
Il17a	8.20195794733354e-37	-6.45189	0.004	0.064	1.3574240402837e-32	0.icl2	Il17a
Ubald2	8.27629504866836e-37	-0.942527	0.258	0.415	1.36972683055461e-32	0.icl2	Ubald2
Crem	9.09530952098231e-37	-1.32108	0.178	0.312	1.50527372572257e-32	0.icl2	Crem
Acpp	1.11517600300491e-36	-1.70429	0.062	0.163	1.84561628497313e-32	0.icl2	Acpp
Dad1	1.16230959567645e-36	0.316597	0.805	0.729	1.92362238084452e-32	0.icl2	Dad1
Fbxl2	1.38032512743301e-36	-1.51039	0.045	0.137	2.28443808590163e-32	0.icl2	Fbxl2
Eid1	1.40002003905994e-36	-0.680192	0.21	0.367	2.3170331646442e-32	0.icl2	Eid1
Rasal2	1.46432151248524e-36	-4.08567	0.01	0.077	2.42345210316308e-32	0.icl2	Rasal2
Swap70	1.50681058757977e-36	-1.59753	0.097	0.208	2.49377152244452e-32	0.icl2	Swap70
Asah1	1.55325043108254e-36	-1.3355	0.063	0.166	2.5706294634416e-32	0.icl2	Asah1
Dlc1	1.61763416651343e-36	-6.40767	0.001	0.057	2.67718454557972e-32	0.icl2	Dlc1
Rps21	1.68033642614583e-36	0.221388	0.997	0.934	2.78095678527134e-32	0.icl2	Rps21
Gtf2i	1.69100320013006e-36	0.783214	0.405	0.308	2.79861029621525e-32	0.icl2	Gtf2i
Nol4l	1.74876794045027e-36	-3.08314	0.006	0.069	2.8942109414452e-32	0.icl2	Nol4l
Tbcb	1.78783302057998e-36	-0.624925	0.201	0.363	2.95886364905987e-32	0.icl2	Tbcb
Sirpb1b	2.03053284000779e-36	-7.41673	0.001	0.057	3.3605318502129e-32	0.icl2	Sirpb1b
Cx3cr1	2.15386047969987e-36	-3.4113	0.013	0.082	3.56463909390329e-32	0.icl2	Cx3cr1
Atxn7l1	2.21490398669688e-36	-0.859149	0.228	0.384	3.66566609798334e-32	0.icl2	Atxn7l1
Kmo	2.64903741967061e-36	-4.37335	0.005	0.066	4.38415692955486e-32	0.icl2	Kmo
Cep170	2.65547341213183e-36	-1.13094	0.111	0.234	4.39480849707818e-32	0.icl2	Cep170
Tnfrsf11a	2.94336161532401e-36	-5.60639	0.002	0.059	4.87126347336123e-32	0.icl2	Tnfrsf11a
Pld1	3.44571287458936e-36	-6.62676	0	0.056	5.70265480744539e-32	0.icl2	Pld1
Pglyrp2	3.62769993299612e-36	1.11407	0.279	0.178	6.00384338910858e-32	0.icl2	Pglyrp2
Areg	3.93509410800145e-36	-4.76064	0.007	0.07	6.5125807487424e-32	0.icl2	Areg
Syne1	4.45992993433014e-36	-1.22545	0.209	0.347	7.38118404131638e-32	0.icl2	Syne1
Stom	4.65586500516291e-36	-4.52488	0.002	0.06	7.70545658354462e-32	0.icl2	Stom
Megf9	4.94956258706146e-36	-1.94128	0.028	0.109	8.19152608158671e-32	0.icl2	Megf9
Dkkl1	6.04161282543227e-36	-5.33188	0.001	0.057	9.99886922609041e-32	0.icl2	Dkkl1
Flt3	6.15622833494364e-36	-2.89255	0.025	0.102	1.01885578943317e-31	0.icl2	Flt3
Ccr1	6.58235803876649e-36	-7.19415	0.001	0.056	1.08938025541585e-31	0.icl2	Ccr1
Dmxl2	6.81145662607559e-36	-9.18281	0	0.054	1.12729607161551e-31	0.icl2	Dmxl2
Tgtp1	7.27175757472635e-36	2.25638	0.077	0.02	1.20347587861721e-31	0.icl2	Tgtp1
Prkd2	7.56143589343246e-36	1.01964	0.292	0.19	1.25141764036307e-31	0.icl2	Prkd2
Tmem37	8.45027599137779e-36	-4.56712	0.003	0.061	1.39852067657302e-31	0.icl2	Tmem37
Bin2	8.59117306331073e-36	0.491857	0.634	0.56	1.42183914197793e-31	0.icl2	Bin2
Pdia6	8.63299224664052e-36	-0.791782	0.268	0.422	1.42876021681901e-31	0.icl2	Pdia6
Cd40	8.80095177442515e-36	-5.04341	0.003	0.06	1.45655751866736e-31	0.icl2	Cd40
Slc15a4	1.00332541731768e-35	-1.93911	0.035	0.121	1.66050356566076e-31	0.icl2	Slc15a4
Atg7	1.11341319579512e-35	-0.966598	0.132	0.26	1.84269883904092e-31	0.icl2	Atg7
Cd38	1.16870665247283e-35	-3.26183	0.009	0.073	1.93420950984254e-31	0.icl2	Cd38
Ldlrad3	1.25176072964692e-35	-3.75217	0.008	0.071	2.07166400756565e-31	0.icl2	Ldlrad3
Pilra	1.36374674918338e-35	-8.44635	0	0.055	2.25700086989849e-31	0.icl2	Pilra
Tab2	1.40561811087882e-35	-0.684488	0.36	0.521	2.32629797350446e-31	0.icl2	Tab2
Qki	1.66460366931504e-35	-0.767464	0.314	0.474	2.7549190727164e-31	0.icl2	Qki
Calr	1.79386654412969e-35	-0.637427	0.453	0.602	2.96884913053464e-31	0.icl2	Calr
Ddx3x	1.86586417577458e-35	-0.761333	0.413	0.569	3.08800521090694e-31	0.icl2	Ddx3x
Fam83a	1.95468213513851e-35	-6.31637	0	0.055	3.23499893365424e-31	0.icl2	Fam83a
Gla	2.01733995593733e-35	-1.31527	0.091	0.201	3.33869762707629e-31	0.icl2	Gla
Zbp1	2.08248861406022e-35	1.18204	0.26	0.161	3.44651865626967e-31	0.icl2	Zbp1
Zbtb7c	2.11395703439083e-35	-6.6215	0.001	0.055	3.49859889191682e-31	0.icl2	Zbtb7c
Txndc5	2.35544029424505e-35	-1.21465	0.072	0.177	3.89825368697556e-31	0.icl2	Txndc5
Nectin1	2.4916943311774e-35	-5.41108	0.002	0.059	4.1237541180986e-31	0.icl2	Nectin1
Slc35c2	2.66528630244968e-35	-1.23679	0.056	0.154	4.41104883055422e-31	0.icl2	Slc35c2
Ipmk	2.72057098044987e-35	-1.53506	0.06	0.158	4.50254497264453e-31	0.icl2	Ipmk
Parp11	2.74316966661143e-35	1.28318	0.219	0.126	4.53994579824192e-31	0.icl2	Parp11
Rbbp8	2.83336697652679e-35	-1.29245	0.117	0.236	4.68922234615184e-31	0.icl2	Rbbp8
Neurl3	3.02802061917689e-35	-0.807259	0.319	0.467	5.01137412473775e-31	0.icl2	Neurl3
Ptprcap	3.17448613030105e-35	0.273905	0.887	0.742	5.25377454564823e-31	0.icl2	Ptprcap
Shank2	3.51808806880023e-35	-6.89023	0.001	0.055	5.82243575386438e-31	0.icl2	Shank2
Lrp8	4.28871799622605e-35	-3.58778	0.009	0.073	7.09782828375411e-31	0.icl2	Lrp8
Tnfrsf21	4.53708030249491e-35	-2.81978	0.012	0.078	7.50886790062908e-31	0.icl2	Tnfrsf21
Slc8b1	4.62880166877741e-35	-3.15302	0.021	0.095	7.66066676182662e-31	0.icl2	Slc8b1
Dynlt3	5.36414761774753e-35	-1.30219	0.041	0.129	8.87766430737216e-31	0.icl2	Dynlt3
Adam11	5.56298302849759e-35	-4.89535	0.005	0.064	9.20673691216351e-31	0.icl2	Adam11
Ivns1abp	6.82754839304741e-35	-0.837432	0.274	0.431	1.12995925904935e-30	0.icl2	Ivns1abp
Pdcd4	7.79723878770885e-35	0.386481	0.782	0.711	1.29044301936581e-30	0.icl2	Pdcd4
Slc16a6	9.76072429114853e-35	-1.34828	0.091	0.199	1.61539987018508e-30	0.icl2	Slc16a6
Rp2	1.04146502500888e-34	-1.69557	0.04	0.127	1.7236246163897e-30	0.icl2	Rp2
Vwa5a	1.04761650516245e-34	-2.00981	0.021	0.096	1.73380531604386e-30	0.icl2	Vwa5a
Snap23	1.1426436597883e-34	-1.28566	0.124	0.247	1.89107525694964e-30	0.icl2	Snap23
Tfeb	1.30737580108534e-34	-1.27663	0.052	0.147	2.16370695079624e-30	0.icl2	Tfeb
Cd96	1.30783460828691e-34	0.828035	0.404	0.31	2.16446627671483e-30	0.icl2	Cd96
Tnip1	1.37394117111991e-34	-0.871557	0.233	0.385	2.27387263820345e-30	0.icl2	Tnip1
Abcc1	1.57461240336175e-34	-1.11898	0.083	0.192	2.60598352756369e-30	0.icl2	Abcc1
Plin3	1.59214782758257e-34	-1.08965	0.076	0.182	2.63500465464916e-30	0.icl2	Plin3
Otulinl	1.6973019876027e-34	0.4285	0.558	0.462	2.80903478948246e-30	0.icl2	Otulinl
Ech1	1.73548479404874e-34	-0.726388	0.165	0.308	2.87222733415066e-30	0.icl2	Ech1
Cmtm6	1.87451138354224e-34	-0.800078	0.153	0.29	3.10231633976241e-30	0.icl2	Cmtm6
Siglech	1.90178804176919e-34	-7.59402	0.003	0.058	3.147459209128e-30	0.icl2	Siglech
Bcl9l	1.91186666093641e-34	1.09375	0.242	0.146	3.16413932384975e-30	0.icl2	Bcl9l
Lsm4	2.32022884709329e-34	0.540596	0.608	0.551	3.83997874193939e-30	0.icl2	Lsm4
Rfx3	2.33770753084985e-34	0.672924	0.46	0.358	3.86890596355651e-30	0.icl2	Rfx3
Clec9a	2.81798363987943e-34	-5.92372	0.002	0.056	4.66376292400045e-30	0.icl2	Clec9a
Tle4	2.82301463592342e-34	0.501261	0.614	0.542	4.67208922245326e-30	0.icl2	Tle4
Myl12a	2.91836451778383e-34	0.418454	0.699	0.639	4.82989327693224e-30	0.icl2	Myl12a
Ttc3	3.00269352758361e-34	0.596429	0.444	0.343	4.96945778815087e-30	0.icl2	Ttc3
Dnase1l3	3.13093205029995e-34	-5.41389	0.002	0.057	5.18169254324642e-30	0.icl2	Dnase1l3
Gstt2	3.25009454259943e-34	1.14594	0.205	0.113	5.37890646800205e-30	0.icl2	Gstt2
Hectd2	3.27301782870716e-34	1.56231	0.131	0.055	5.41684450651036e-30	0.icl2	Hectd2
Rap2a	3.48459232058708e-34	-1.64959	0.038	0.123	5.76700029057162e-30	0.icl2	Rap2a
Cd101	3.55553574200449e-34	-2.31354	0.029	0.107	5.88441165301743e-30	0.icl2	Cd101
Clec2d	3.65561894813826e-34	0.312801	0.742	0.66	6.05004935916882e-30	0.icl2	Clec2d
S100a1	3.72303161289302e-34	-3.73593	0.004	0.061	6.16161731933795e-30	0.icl2	S100a1
Evi5	4.71903314908317e-34	-1.75583	0.031	0.11	7.80999986173264e-30	0.icl2	Evi5
Dhrs3	6.19258011936258e-34	-3.95622	0.006	0.064	1.02487200975451e-29	0.icl2	Dhrs3
Hsd11b1	8.20533478652797e-34	0.596688	0.464	0.359	1.35798290717038e-29	0.icl2	Hsd11b1
Ly96	8.61214660987376e-34	-2.36849	0.012	0.076	1.42531026393411e-29	0.icl2	Ly96
Hes1	9.05697486579046e-34	-3.05626	0.01	0.073	1.49892934028832e-29	0.icl2	Hes1
Ybx3	9.46458126796583e-34	-0.83145	0.165	0.299	1.56638819984835e-29	0.icl2	Ybx3
Cpne2	1.02300258111805e-33	-3.38506	0.007	0.067	1.69306927175038e-29	0.icl2	Cpne2
Myo1c	1.04062211658672e-33	-2.43515	0.015	0.083	1.72222960295102e-29	0.icl2	Myo1c
Ggh	1.06154164252487e-33	-1.00342	0.07	0.172	1.75685141837865e-29	0.icl2	Ggh
Ago4	1.08066063239759e-33	-6.56469	0	0.052	1.78849334661801e-29	0.icl2	Ago4
Slc9a7	1.1700102840995e-33	-1.01552	0.137	0.259	1.93636702018467e-29	0.icl2	Slc9a7
Ppp1r11	1.55997523342141e-33	-0.616357	0.288	0.452	2.58175901131244e-29	0.icl2	Ppp1r11
Ppp1r14c	1.60458181142849e-33	-8.54914	0	0.051	2.65558289791416e-29	0.icl2	Ppp1r14c
Aak1	1.63272563428726e-33	0.455206	0.637	0.544	2.70216092474542e-29	0.icl2	Aak1
Ptprs	1.6769053922471e-33	-1.95437	0.036	0.117	2.77527842416895e-29	0.icl2	Ptprs
Ntng2	1.68127143703935e-33	-1.67992	0.039	0.123	2.78250422830013e-29	0.icl2	Ntng2
Naaa	1.77933351226089e-33	-3.29375	0.016	0.083	2.94479696279177e-29	0.icl2	Naaa
Fkbp2	2.4772737733907e-33	-0.763706	0.172	0.31	4.0998880949616e-29	0.icl2	Fkbp2
Rarg	2.56440425236598e-33	-1.00843	0.098	0.209	4.24408903766569e-29	0.icl2	Rarg
Adk	2.61616888825921e-33	0.749737	0.342	0.239	4.32975951006899e-29	0.icl2	Adk
Slc16a3	2.81572434207646e-33	-4.5465	0.004	0.06	4.66002378613654e-29	0.icl2	Slc16a3
Pde1c	3.0133722710091e-33	-2.67764	0.02	0.089	4.98713110852007e-29	0.icl2	Pde1c
Mt1	3.10331771204368e-33	-3.69106	0.01	0.072	5.13599081343229e-29	0.icl2	Mt1
Ncf4	3.12117553410878e-33	-1.04615	0.141	0.264	5.16554550895003e-29	0.icl2	Ncf4
Sowahc	3.51836657045767e-33	-4.28466	0.004	0.059	5.82289667410745e-29	0.icl2	Sowahc
Traf3ip3	4.33065339402988e-33	0.694814	0.45	0.365	7.16723136711945e-29	0.icl2	Traf3ip3
Cfp	4.3723404609758e-33	-3.08617	0.011	0.074	7.23622346291496e-29	0.icl2	Cfp
Il4i1	5.39223019415263e-33	-4.79972	0.006	0.063	8.9241409713226e-29	0.icl2	Il4i1
Bmpr1a	5.48315261804131e-33	-2.49721	0.013	0.076	9.07461758285837e-29	0.icl2	Bmpr1a
Nos1ap	6.64575278120738e-33	-5.04355	0.001	0.053	1.09987208528982e-28	0.icl2	Nos1ap
Vwa8	6.8001227369597e-33	-1.06143	0.081	0.185	1.12542031296683e-28	0.icl2	Vwa8
Ehd4	6.97581935764307e-33	-1.09683	0.097	0.205	1.15449810368993e-28	0.icl2	Ehd4
Hexb	7.31413511335091e-33	-1.26444	0.337	0.498	1.21048936125958e-28	0.icl2	Hexb
Actb	7.31919280895221e-33	0.10753	0.999	0.971	1.21132640988159e-28	0.icl2	Actb
Fam174a	7.52601822004575e-33	-0.957961	0.092	0.204	1.24555601541757e-28	0.icl2	Fam174a
Ier5l	8.26800977586796e-33	-3.44543	0.007	0.065	1.36835561790615e-28	0.icl2	Ier5l
Dock1	8.90657875083997e-33	-7.00151	0.001	0.051	1.47403878326402e-28	0.icl2	Dock1
Slc17a9	9.05251325230564e-33	1.20182	0.183	0.098	1.49819094325658e-28	0.icl2	Slc17a9
Gtf2ird1	9.30988449388934e-33	1.75111	0.083	0.025	1.54078588373869e-28	0.icl2	Gtf2ird1
Egfr	9.3895159122766e-33	-5.84198	0.001	0.051	1.55396488348178e-28	0.icl2	Egfr
Agrp	9.6098207392875e-33	1.221	0.223	0.132	1.59042533235208e-28	0.icl2	Agrp
Gnb4	1.07669363188931e-32	-3.28392	0.016	0.082	1.78192796077681e-28	0.icl2	Gnb4
Dlg5	1.33939912277335e-32	-7.10899	0	0.05	2.2167055481899e-28	0.icl2	Dlg5
Gm5150	1.36774087019601e-32	-7.88093	0	0.05	2.2636111401744e-28	0.icl2	Gm5150
Cd33	1.38295345362552e-32	-7.60754	0	0.05	2.28878796575023e-28	0.icl2	Cd33
Slc44a1	1.44940882285072e-32	-1.51421	0.054	0.144	2.39877160181794e-28	0.icl2	Slc44a1
Ndrg1	1.46285799962218e-32	-2.80842	0.012	0.074	2.42102998937471e-28	0.icl2	Ndrg1
Dock7	1.51514232489456e-32	-4.85725	0.003	0.055	2.50756054770049e-28	0.icl2	Dock7
Arf4	1.71456506408732e-32	-0.494205	0.6	0.729	2.83760518106452e-28	0.icl2	Arf4
Rabgef1	1.74883207640003e-32	-1.20491	0.108	0.218	2.89431708644205e-28	0.icl2	Rabgef1
Rasa3	1.91493449291102e-32	0.510106	0.562	0.482	3.16921658576773e-28	0.icl2	Rasa3
Foxn3	1.98334732214841e-32	0.40745	0.744	0.677	3.28243981815563e-28	0.icl2	Foxn3
Fam172a	2.03714622093356e-32	0.426171	0.726	0.655	3.37147699564503e-28	0.icl2	Fam172a
Sft2d2	2.53546656805351e-32	-1.0228	0.088	0.194	4.19619717012857e-28	0.icl2	Sft2d2
BC028528	3.00403355246472e-32	-4.19959	0.004	0.058	4.97167552932912e-28	0.icl2	BC028528
Selenom	3.36610679216376e-32	-6.38091	0	0.05	5.57090674103102e-28	0.icl2	Selenom
Hpse	3.89506338985078e-32	-3.70127	0.005	0.059	6.44632991020304e-28	0.icl2	Hpse
Rnf150	4.06684173912396e-32	-6.50011	0.001	0.051	6.73062307825016e-28	0.icl2	Rnf150
Egr1	4.12770546703153e-32	-0.880308	0.326	0.448	6.83135254793718e-28	0.icl2	Egr1
Ap3s1	4.56192198519444e-32	-0.60799	0.255	0.409	7.54998088549679e-28	0.icl2	Ap3s1
Hspa4	5.23397314988132e-32	0.455483	0.69	0.639	8.66222556305358e-28	0.icl2	Hspa4
Capn2	5.29858547905918e-32	-0.974923	0.082	0.187	8.76915896784294e-28	0.icl2	Capn2
Bri3bp	5.49742967152344e-32	-1.19626	0.06	0.154	9.09824610637129e-28	0.icl2	Bri3bp
Ggt1	5.79791642900041e-32	2.19268	0.064	0.016	9.59555168999568e-28	0.icl2	Ggt1
Aplp2	6.63327285744104e-32	-0.670552	0.216	0.361	1.09780665790649e-27	0.icl2	Aplp2
Pdia3	7.18308342840045e-32	-0.619003	0.499	0.631	1.18880030740027e-27	0.icl2	Pdia3
Npnt	7.41468399508565e-32	-5.86406	0.001	0.051	1.22713020118667e-27	0.icl2	Npnt
Ap1s2	7.88715278046091e-32	-1.00462	0.085	0.189	1.30532378516628e-27	0.icl2	Ap1s2
Atf7ip	7.88735600442279e-32	0.480147	0.559	0.482	1.30535741873197e-27	0.icl2	Atf7ip
Hsp90ab1	8.75050161973004e-32	0.24126	0.982	0.912	1.44820801806532e-27	0.icl2	Hsp90ab1
Gimap7	9.23203905363242e-32	0.998869	0.243	0.147	1.52790246337617e-27	0.icl2	Gimap7
Rhbdf2	9.99717305398563e-32	-1.90626	0.021	0.089	1.65453214043462e-27	0.icl2	Rhbdf2
Psmb10	1.00478722079345e-31	0.580802	0.538	0.48	1.66292285041315e-27	0.icl2	Psmb10
Spib	1.10069304576772e-31	-4.4581	0.002	0.053	1.82164699074557e-27	0.icl2	Spib
Nfkbib	1.13058385339723e-31	-0.69526	0.131	0.256	1.87111627737241e-27	0.icl2	Nfkbib
Tgif1	1.21550482775435e-31	-0.970148	0.124	0.24	2.01166048993344e-27	0.icl2	Tgif1
Ifitm1	1.24621148477885e-31	-6.81756	0.004	0.056	2.06248000730899e-27	0.icl2	Ifitm1
Mgat4b	1.31362178496691e-31	-1.53906	0.041	0.122	2.17404405412024e-27	0.icl2	Mgat4b
Tifab	1.33225825568729e-31	-5.70174	0.001	0.05	2.20488741316246e-27	0.icl2	Tifab
Phka1	1.39986266532996e-31	-6.55424	0	0.049	2.31677271112109e-27	0.icl2	Phka1
Tmbim4	1.53161870620773e-31	-0.555661	0.303	0.467	2.53482895877379e-27	0.icl2	Tmbim4
Tmem238	1.54295972725321e-31	-1.49145	0.029	0.104	2.55359834860406e-27	0.icl2	Tmem238
Sh3bp4	1.58716924600937e-31	-4.37506	0.003	0.054	2.6267651021455e-27	0.icl2	Sh3bp4
Clec4d	1.63811819778851e-31	-7.38126	0.001	0.05	2.71108561733999e-27	0.icl2	Clec4d
Tlk1	1.69377620650416e-31	0.655422	0.486	0.417	2.80319962176439e-27	0.icl2	Tlk1
Map4k4	1.76126850012794e-31	0.348177	0.655	0.593	2.91489936771174e-27	0.icl2	Map4k4
Piezo1	1.98513988593901e-31	-0.915559	0.182	0.313	3.28540651122907e-27	0.icl2	Piezo1
Tnfsf12	2.17096137384839e-31	-5.55409	0.001	0.049	3.59294107371909e-27	0.icl2	Tnfsf12
Msrb1	2.20585702621885e-31	-2.80601	0.102	0.204	3.6506933783922e-27	0.icl2	Msrb1
Zfp608	2.3781092007397e-31	-1.52915	0.073	0.168	3.93577072722421e-27	0.icl2	Zfp608
Mxi1	2.41773780107975e-31	-1.72241	0.06	0.149	4.00135606078698e-27	0.icl2	Mxi1
Kcnk5	2.43581470255308e-31	-1.85491	0.024	0.095	4.03127333272535e-27	0.icl2	Kcnk5
Zbtb10	2.68041816481628e-31	-1.19117	0.088	0.19	4.43609206277093e-27	0.icl2	Zbtb10
Ifi207	2.78780174069139e-31	-6.4842	0.001	0.049	4.61381188084425e-27	0.icl2	Ifi207
Ptgs2	3.28942938656345e-31	-5.08358	0.006	0.06	5.44400563476251e-27	0.icl2	Ptgs2
Klrg1	3.95501826661557e-31	-6.1613	0.001	0.05	6.54555523124877e-27	0.icl2	Klrg1
Eloa	3.95508626235062e-31	-0.885294	0.111	0.225	6.54566776419028e-27	0.icl2	Eloa
Tex14	4.12979427812556e-31	-1.11601	0.118	0.231	6.8348095302978e-27	0.icl2	Tex14
Prrg1	5.13801187419445e-31	1.32079	0.137	0.063	8.50340965179182e-27	0.icl2	Prrg1
Apobr	5.61083211766379e-31	-1.82239	0.027	0.098	9.28592715473357e-27	0.icl2	Apobr
Ikzf3	5.66550613426941e-31	-0.871339	0.461	0.564	9.37641265221588e-27	0.icl2	Ikzf3
Rnf149	5.86856794476017e-31	-1.78698	0.144	0.257	9.71247994857809e-27	0.icl2	Rnf149
Atp6v0a1	7.95423525200644e-31	-2.03646	0.025	0.095	1.31642593420707e-26	0.icl2	Atp6v0a1
Diaph1	8.8864233974841e-31	-0.565791	0.487	0.628	1.47070307228362e-26	0.icl2	Diaph1
C5ar1	8.91236684493251e-31	-7.79418	0.001	0.049	1.47499671283633e-26	0.icl2	C5ar1
Sgms2	9.19283993084245e-31	-6.18051	0.003	0.053	1.52141500855443e-26	0.icl2	Sgms2
Capns1	9.98642097312649e-31	-0.54377	0.29	0.453	1.65275267105243e-26	0.icl2	Capns1
Rps6ka5	1.06503531369264e-30	-0.872579	0.185	0.313	1.76263344416131e-26	0.icl2	Rps6ka5
Cd300c	1.12001554305029e-30	-5.52972	0.003	0.052	1.85362572374823e-26	0.icl2	Cd300c
Crlf2	1.24139314507882e-30	-0.586265	0.173	0.311	2.05450565510545e-26	0.icl2	Crlf2
Igsf8	1.24217452051982e-30	-1.80736	0.016	0.079	2.0557988314603e-26	0.icl2	Igsf8
Frmd4a	1.25504002367771e-30	-1.73515	0.044	0.124	2.07709123918661e-26	0.icl2	Frmd4a
Ier3	1.33273814577376e-30	-3.18096	0.02	0.086	2.20568163125557e-26	0.icl2	Ier3
Csf2	1.36384281519119e-30	-4.87302	0.002	0.051	2.25715985914143e-26	0.icl2	Csf2
Trps1	1.39349329083919e-30	-0.939569	0.334	0.467	2.30623139633886e-26	0.icl2	Trps1
Tec	1.42937430383971e-30	-0.793623	0.205	0.34	2.36561447285472e-26	0.icl2	Tec
Fcrla	1.68199067389104e-30	-4.9817	0.002	0.051	2.78369456528967e-26	0.icl2	Fcrla
Fxyd5	1.68280936344854e-30	0.130127	0.956	0.845	2.78504949650733e-26	0.icl2	Fxyd5
Asb2	1.75606238439124e-30	-4.74674	0.002	0.051	2.9062832461675e-26	0.icl2	Asb2
Myo6	1.77435333760153e-30	-1.51899	0.03	0.103	2.93655477373053e-26	0.icl2	Myo6
Synj1	2.02611968926589e-30	-1.04725	0.182	0.308	3.35322808573504e-26	0.icl2	Synj1
Septin1	2.16204373757319e-30	0.350325	0.746	0.658	3.57818238568363e-26	0.icl2	Septin1
Map2k3	2.25217016988773e-30	-1.00464	0.078	0.177	3.7273416311642e-26	0.icl2	Map2k3
Klra3	2.31012905138587e-30	-8.35973	0	0.047	3.82326358004362e-26	0.icl2	Klra3
Naip6	3.14461639796006e-30	-5.85302	0.001	0.048	5.20434013862389e-26	0.icl2	Naip6
Fgd4	3.32425995544871e-30	-5.75841	0.001	0.049	5.50165022626761e-26	0.icl2	Fgd4
Tapbpl	3.39789918433981e-30	1.00779	0.292	0.204	5.62352315008238e-26	0.icl2	Tapbpl
Sirpb1c	3.6222587501633e-30	-8.72572	0	0.045	5.99483823152026e-26	0.icl2	Sirpb1c
Adam9	3.63712055758019e-30	-2.09422	0.02	0.085	6.01943452279522e-26	0.icl2	Adam9
Stim1	3.68779223571976e-30	0.507918	0.586	0.514	6.1032961501162e-26	0.icl2	Stim1
Cracr2a	3.77988490257512e-30	0.941699	0.291	0.199	6.25570951376182e-26	0.icl2	Cracr2a
Dnajc15	4.03958887787643e-30	0.514167	0.564	0.494	6.6855195928855e-26	0.icl2	Dnajc15
Or4c12	4.06842559775827e-30	-7.37789	0	0.046	6.73324436428994e-26	0.icl2	Or4c12
Nr1d2	4.33588470531642e-30	-0.961878	0.09	0.192	7.17588918729867e-26	0.icl2	Nr1d2
Rilpl2	4.35576403988485e-30	-0.995441	0.154	0.275	7.20878948600942e-26	0.icl2	Rilpl2
Stk39	5.00129356261045e-30	-0.750889	0.153	0.274	8.2771408461203e-26	0.icl2	Stk39
Nek7	5.46054712463108e-30	-0.589858	0.3	0.454	9.03720549126443e-26	0.icl2	Nek7
Cox6a2	5.71975048060368e-30	-5.61934	0.005	0.056	9.46618704539909e-26	0.icl2	Cox6a2
Colgalt1	6.3814971377203e-30	-1.20791	0.072	0.166	1.05613777629271e-25	0.icl2	Colgalt1
Klra17	6.40624315709962e-30	-8.68085	0	0.045	1.06023324249999e-25	0.icl2	Klra17
Cyb561a3	6.72515495137063e-30	-2.14402	0.035	0.108	1.11301314445184e-25	0.icl2	Cyb561a3
Dok3	6.99477104783956e-30	-3.73236	0.005	0.056	1.15763460841745e-25	0.icl2	Dok3
Mlf1	7.27900704504108e-30	-3.73128	0.004	0.053	1.2046756659543e-25	0.icl2	Mlf1
Arhgap10	7.56565959323577e-30	-0.828514	0.127	0.239	1.25211666268052e-25	0.icl2	Arhgap10
Lars2	7.60061070480672e-30	-1.18083	0.809	0.881	1.25790107164551e-25	0.icl2	Lars2
Elmo2	8.32286466400725e-30	-1.46364	0.051	0.135	1.3774341018932e-25	0.icl2	Elmo2
Prr5	8.78519958628957e-30	-4.39449	0.001	0.048	1.45395053153092e-25	0.icl2	Prr5
Tlr1	8.83633070260485e-30	1.6333	0.123	0.055	1.4624127312811e-25	0.icl2	Tlr1
Pqlc3	8.94906711000986e-30	-1.45075	0.033	0.108	1.48107060670663e-25	0.icl2	Pqlc3
Hcls1	8.94981817773589e-30	-0.616202	0.275	0.431	1.48119490841529e-25	0.icl2	Hcls1
Map3k5	9.23714233791348e-30	-0.813523	0.276	0.42	1.52874705692468e-25	0.icl2	Map3k5
Plcg1	1.0771586415226e-29	0.905017	0.258	0.168	1.78269755171991e-25	0.icl2	Plcg1
Trem3	1.15746797000371e-29	-5.93616	0.001	0.046	1.91560949035615e-25	0.icl2	Trem3
Tdrd7	1.26253162037202e-29	-2.19397	0.017	0.078	2.08948983171569e-25	0.icl2	Tdrd7
L1cam	1.30468218972579e-29	-1.84658	0.019	0.083	2.15924902399618e-25	0.icl2	L1cam
Borcs7	1.34855427765811e-29	-1.27852	0.056	0.143	2.23185732952417e-25	0.icl2	Borcs7
Picalm	1.39763946622857e-29	-0.852868	0.468	0.616	2.31309331660828e-25	0.icl2	Picalm
Lag3	1.49544796926079e-29	-4.04157	0.004	0.054	2.4749663891266e-25	0.icl2	Lag3
Tnfrsf1a	1.52269497813055e-29	-1.93855	0.036	0.111	2.52006018880605e-25	0.icl2	Tnfrsf1a
Tbxa2r	1.54844365933129e-29	1.7007	0.125	0.057	2.56267425619328e-25	0.icl2	Tbxa2r
Mxd1	1.58112528937821e-29	-1.36187	0.203	0.319	2.61676235392094e-25	0.icl2	Mxd1
Bcl3	1.62415754020936e-29	-1.4653	0.037	0.114	2.6879807290465e-25	0.icl2	Bcl3
Klrc3	1.64793400143872e-29	-5.67877	0.001	0.047	2.72733077238108e-25	0.icl2	Klrc3
Adgre1	1.70935226021162e-29	-5.95778	0.001	0.047	2.82897799065023e-25	0.icl2	Adgre1
Dock4	1.75423012691465e-29	-2.24809	0.037	0.11	2.90325086004374e-25	0.icl2	Dock4
Sec24d	1.78520657387375e-29	-1.238	0.042	0.121	2.95451687976105e-25	0.icl2	Sec24d
Stat3	1.80457341158124e-29	-0.834206	0.388	0.532	2.98656899616695e-25	0.icl2	Stat3
Snx8	2.00457793527664e-29	-3.9433	0.005	0.056	3.31757648288284e-25	0.icl2	Snx8
Ctsb	2.15110342988239e-29	-1.53726	0.186	0.304	3.56007617645536e-25	0.icl2	Ctsb
Snrpe	2.32398655467112e-29	0.326837	0.784	0.729	3.8461977479807e-25	0.icl2	Snrpe
Snx10	2.49710587121775e-29	-1.71381	0.051	0.132	4.13271021686538e-25	0.icl2	Snx10
Smim5	2.55625554995358e-29	-5.51688	0.002	0.048	4.23060293517317e-25	0.icl2	Smim5
Ifi47	2.60632485733803e-29	1.02346	0.308	0.223	4.31346763889444e-25	0.icl2	Ifi47
Cemip2	2.73263665236577e-29	-1.87077	0.027	0.096	4.52251365966535e-25	0.icl2	Cemip2
Mmp9	2.82016655495948e-29	-6.95607	0.001	0.047	4.66737564845794e-25	0.icl2	Mmp9
Ube2e3	3.00267973287016e-29	-0.723177	0.162	0.288	4.96943495790011e-25	0.icl2	Ube2e3
Scamp2	3.10137106819436e-29	-0.787116	0.128	0.245	5.13276911786167e-25	0.icl2	Scamp2
Hbegf	3.16358159351924e-29	-4.77023	0.003	0.051	5.23572753727434e-25	0.icl2	Hbegf
Slc14a1	3.51367297827367e-29	0.821914	0.268	0.176	5.81512877904292e-25	0.icl2	Slc14a1
Psd2	3.53858891704621e-29	-7.91687	0	0.044	5.85636465771148e-25	0.icl2	Psd2
Fbxo30	3.87684696024137e-29	-1.52419	0.036	0.111	6.41618171919947e-25	0.icl2	Fbxo30
Cxcr2	4.44360052061952e-29	-6.07696	0.002	0.048	7.35415886162531e-25	0.icl2	Cxcr2
Tamalin	4.53553500554974e-29	-2.43837	0.049	0.128	7.50631043418481e-25	0.icl2	Tamalin
Actn2	4.55309293722545e-29	-1.23366	0.109	0.206	7.53536881110811e-25	0.icl2	Actn2
Tcirg1	4.9330885072407e-29	-1.81821	0.042	0.12	8.16426147948335e-25	0.icl2	Tcirg1
Camk2d	5.97254680632329e-29	0.475265	0.6	0.52	9.88456496446504e-25	0.icl2	Camk2d
Arg2	6.02728411445662e-29	-5.8996	0.002	0.048	9.97515520942571e-25	0.icl2	Arg2
Mapkapk3	6.15731728241697e-29	-0.85641	0.117	0.227	1.01903601024001e-24	0.icl2	Mapkapk3
Abracl	6.49433462315135e-29	0.3561	0.725	0.671	1.07481238013155e-24	0.icl2	Abracl
Clec4e	6.58186552777648e-29	-5.98461	0.004	0.052	1.08929874484701e-24	0.icl2	Clec4e
Klra2	7.21605402723889e-29	-7.41288	0	0.044	1.19425694150804e-24	0.icl2	Klra2
Zfp292	7.39954475560282e-29	0.472205	0.577	0.521	1.22462465705227e-24	0.icl2	Zfp292
Nostrin	7.73639227478025e-29	-4.83497	0.003	0.051	1.28037292147613e-24	0.icl2	Nostrin
Cd200r1	7.96990540525162e-29	-2.21061	0.016	0.076	1.31901934456914e-24	0.icl2	Cd200r1
Il15	8.70143158732266e-29	-2.05387	0.045	0.122	1.4400869277019e-24	0.icl2	Il15
Znrf3	9.22204457404273e-29	0.536108	0.538	0.451	1.52624837700407e-24	0.icl2	Znrf3
Pik3cd	9.93341768325864e-29	0.495401	0.608	0.555	1.6439806265793e-24	0.icl2	Pik3cd
Lingo4	1.10436744128501e-28	-7.80964	0	0.043	1.82772811532669e-24	0.icl2	Lingo4
Podnl1	1.12772943290277e-28	-1.3935	0.042	0.12	1.86639221145408e-24	0.icl2	Podnl1
Klk8	1.1341936962751e-28	0.608055	0.444	0.351	1.8770905673353e-24	0.icl2	Klk8
Tbc1d10c	1.17729718222451e-28	0.563503	0.496	0.428	1.94842683658156e-24	0.icl2	Tbc1d10c
Ptpn13	1.18252649466572e-28	-2.03648	0.025	0.091	1.95708134867176e-24	0.icl2	Ptpn13
C3	1.22360031636723e-28	-5.99367	0.001	0.046	2.02505852358777e-24	0.icl2	C3
Csf1	1.31429282324307e-28	-4.98984	0.006	0.056	2.17515462246727e-24	0.icl2	Csf1
Cltc	1.35907692783841e-28	-0.67104	0.279	0.428	2.24927231557256e-24	0.icl2	Cltc
Arl11	1.38150898446921e-28	-3.47069	0.004	0.051	2.28639736929655e-24	0.icl2	Arl11
Cma1	1.43037051601924e-28	-6.85719	0.001	0.045	2.36726320401183e-24	0.icl2	Cma1
Cd300ld	1.71228247176278e-28	-7.10189	0	0.044	2.83382749076739e-24	0.icl2	Cd300ld
Bmyc	1.76989920329671e-28	-0.865053	0.082	0.18	2.92918318145606e-24	0.icl2	Bmyc
Tyk2	1.85309999681826e-28	-1.05679	0.097	0.199	3.06688049473422e-24	0.icl2	Tyk2
Acyp2	1.96263696651571e-28	-1.38864	0.039	0.114	3.2481641795835e-24	0.icl2	Acyp2
B2m	2.10104207288013e-28	0.156298	0.997	0.951	3.47722463061662e-24	0.icl2	B2m
Grk6	2.13567054294878e-28	0.719154	0.381	0.301	3.53453474858024e-24	0.icl2	Grk6
Pdia4	2.27074371783249e-28	-0.704977	0.173	0.3	3.75808085301277e-24	0.icl2	Pdia4
Nhsl2	2.30263229487644e-28	-3.40066	0.003	0.05	3.81085644802051e-24	0.icl2	Nhsl2
Sema7a	2.47753489539404e-28	-4.89851	0.003	0.05	4.10032025187713e-24	0.icl2	Sema7a
Pltp	2.48576311217167e-28	-3.35704	0.01	0.064	4.11393795064411e-24	0.icl2	Pltp
Aph1c	2.59312934089145e-28	-3.30415	0.002	0.048	4.29162905917536e-24	0.icl2	Aph1c
Ifi211	2.67016603665601e-28	-5.9262	0.001	0.044	4.41912479066569e-24	0.icl2	Ifi211
Apol7b	2.75989848409562e-28	-6.43634	0.001	0.045	4.56763199117825e-24	0.icl2	Apol7b
Glrx	2.85349381891423e-28	-1.27189	0.058	0.143	4.72253227030305e-24	0.icl2	Glrx
Slc22a23	3.03609217866641e-28	-7.20762	0	0.043	5.0247325556929e-24	0.icl2	Slc22a23
Trpm2	3.34714373372684e-28	-5.95938	0.002	0.047	5.53952287931791e-24	0.icl2	Trpm2
Il3ra	3.41705249600763e-28	-2.33821	0.017	0.076	5.65522188089263e-24	0.icl2	Il3ra
Pnrc1	3.53066183065301e-28	-0.484686	0.682	0.779	5.84324532973073e-24	0.icl2	Pnrc1
Fmn1	3.92365010610696e-28	-6.12576	0.001	0.045	6.49364092560701e-24	0.icl2	Fmn1
Tma7	3.94189511649168e-28	0.272266	0.847	0.792	6.52383641779373e-24	0.icl2	Tma7
Pde8a	4.044797223776e-28	-1.47931	0.041	0.116	6.69413940534928e-24	0.icl2	Pde8a
Rps25	4.40243260360543e-28	0.203699	0.992	0.906	7.28602595896699e-24	0.icl2	Rps25
Zfp703	4.4685390452677e-28	-1.96934	0.018	0.078	7.39543211991804e-24	0.icl2	Zfp703
Fscn1	4.5224738005974e-28	-6.20762	0.002	0.047	7.4846941399887e-24	0.icl2	Fscn1
Plekhg1	4.88640952400712e-28	-5.14196	0.002	0.046	8.08700776223178e-24	0.icl2	Plekhg1
Lrrc8d	5.22035087786357e-28	-0.851184	0.189	0.313	8.63968070286422e-24	0.icl2	Lrrc8d
Rhoc	5.69186262847469e-28	-3.22126	0.006	0.056	9.42003265012561e-24	0.icl2	Rhoc
Clasp2	6.12912898015724e-28	-0.64969	0.244	0.384	1.01437084621602e-23	0.icl2	Clasp2
Edaradd	6.35948076790654e-28	-2.40163	0.013	0.068	1.05249406708853e-23	0.icl2	Edaradd
Nenf	6.63161663116474e-28	-1.15645	0.035	0.107	1.09753255245776e-23	0.icl2	Nenf
Nagk	7.23282576260885e-28	-1.51088	0.032	0.102	1.19703266371176e-23	0.icl2	Nagk
Nadk	7.50026285468512e-28	-1.33748	0.126	0.231	1.24129350245039e-23	0.icl2	Nadk
Uap1	7.77603337553706e-28	-1.58453	0.077	0.167	1.28693352365138e-23	0.icl2	Uap1
mt-Nd5	8.30097787184986e-28	-0.735083	0.839	0.869	1.37381183779115e-23	0.icl2	mt-Nd5
Ubash3a	8.73386339881245e-28	1.2717	0.168	0.091	1.44545439250346e-23	0.icl2	Ubash3a
Strip2	9.0741346433235e-28	-5.46855	0.003	0.049	1.50176928347004e-23	0.icl2	Strip2
Atp5h	9.18721566379126e-28	0.253508	0.929	0.842	1.52048419235745e-23	0.icl2	Atp5h
Pbxip1	9.34112437426541e-28	-0.816633	0.176	0.299	1.54595608394092e-23	0.icl2	Pbxip1
Tspan33	9.56084193793511e-28	-6.74877	0	0.043	1.58231934072826e-23	0.icl2	Tspan33
Clec10a	9.57211400114021e-28	-6.66548	0	0.043	1.58418486718871e-23	0.icl2	Clec10a
Slfn8	9.76226820054157e-28	0.864293	0.268	0.179	1.61565538718963e-23	0.icl2	Slfn8
Mgat5	1.2438234573534e-27	-0.657974	0.46	0.58	2.05852782191988e-23	0.icl2	Mgat5
Lifr	1.26893568024379e-27	-6.53725	0	0.042	2.10008855080347e-23	0.icl2	Lifr
Cblb	1.30024909917292e-27	0.193695	0.694	0.602	2.15191225913119e-23	0.icl2	Cblb
Dpp10	1.35943381821586e-27	-7.56761	0.003	0.047	2.24986296914725e-23	0.icl2	Dpp10
Gabbr1	1.44469069620459e-27	-0.899685	0.106	0.208	2.39096310221859e-23	0.icl2	Gabbr1
Ebi3	1.46690015186547e-27	-5.93106	0.001	0.043	2.42771975133735e-23	0.icl2	Ebi3
Mpp7	1.46784504151942e-27	-1.31675	0.199	0.314	2.42928354371463e-23	0.icl2	Mpp7
Stk10	1.62587777831316e-27	0.405344	0.618	0.553	2.69082772310828e-23	0.icl2	Stk10
Sirpd	1.6268532537646e-27	-7.60694	0	0.042	2.69244213498042e-23	0.icl2	Sirpd
Itgb5	1.68610517201063e-27	-4.88897	0.001	0.044	2.79050405967759e-23	0.icl2	Itgb5
Atp6v0e	1.6969227182892e-27	-0.451611	0.506	0.654	2.80840709876862e-23	0.icl2	Atp6v0e
Plxnb2	1.71205811841652e-27	-6.16245	0	0.042	2.83345618597934e-23	0.icl2	Plxnb2
Colgalt2	1.78891419917815e-27	-5.09956	0.001	0.045	2.96065299963984e-23	0.icl2	Colgalt2
Sh2b2	1.95195273098728e-27	-4.84893	0.001	0.045	3.23048176978395e-23	0.icl2	Sh2b2
Lacc1	2.45927939710522e-27	-4.70718	0.003	0.048	4.07010740220915e-23	0.icl2	Lacc1
Ubb	2.48044303728513e-27	0.233779	0.997	0.946	4.10513322670689e-23	0.icl2	Ubb
Ly6c2	2.6400521480305e-27	-1.003	0.178	0.279	4.36928630499048e-23	0.icl2	Ly6c2
Marchf8	2.64524376626483e-27	-3.47452	0.005	0.052	4.3778784331683e-23	0.icl2	Marchf8
Clec4a2	2.83717310395063e-27	-5.67067	0.001	0.044	4.69552148703829e-23	0.icl2	Clec4a2
Tnni2	2.96094997399713e-27	-6.86159	0	0.042	4.90037220696524e-23	0.icl2	Tnni2
Mrpl58	3.10324489115597e-27	0.778049	0.367	0.293	5.13587029486313e-23	0.icl2	Mrpl58
Tep1	3.2961695266245e-27	-1.47799	0.043	0.118	5.45516056656355e-23	0.icl2	Tep1
Spty2d1	3.40059010040904e-27	-0.83176	0.178	0.3	5.62797661617696e-23	0.icl2	Spty2d1
Il1rl1	3.6260903324687e-27	-6.262	0.001	0.043	6.00117950023569e-23	0.icl2	Il1rl1
Plekhb2	3.68881482820438e-27	-0.996533	0.058	0.141	6.10498854067825e-23	0.icl2	Plekhb2
Ftl1	3.77291162857817e-27	-0.732283	0.907	0.889	6.24416874529688e-23	0.icl2	Ftl1
Zdhhc20	3.83833723377298e-27	0.515583	0.562	0.507	6.35244812189429e-23	0.icl2	Zdhhc20
Marveld1	4.08280325545805e-27	-1.65363	0.03	0.098	6.75703938778307e-23	0.icl2	Marveld1
Ccser1	4.30570802541165e-27	-5.10798	0.005	0.051	7.12594678205627e-23	0.icl2	Ccser1
Arap3	4.37814777853352e-27	-3.59755	0.005	0.051	7.24583457347298e-23	0.icl2	Arap3
Zfp366	4.93674743810677e-27	-6.26395	0.001	0.043	8.17031701006671e-23	0.icl2	Zfp366
Cd24a	5.09371770954729e-27	-2.17101	0.037	0.106	8.43010280930077e-23	0.icl2	Cd24a
Dnah8	5.88257475808952e-27	1.00481	0.204	0.122	9.73566122463815e-23	0.icl2	Dnah8
Il31ra	6.73183144818705e-27	-1.26921	0.274	0.413	1.11411810467496e-22	0.icl2	Il31ra
3830406C13Rik	7.26582984712369e-27	-0.864956	0.085	0.179	1.20249483969897e-22	0.icl2	3830406C13Rik
Hexa	8.47896196917138e-27	-0.891651	0.101	0.202	1.40326820589786e-22	0.icl2	Hexa
Cep85l	8.62532426293828e-27	-1.39569	0.043	0.116	1.42749116551629e-22	0.icl2	Cep85l
Muc1	8.76079934493807e-27	-5.51159	0.001	0.043	1.44991229158725e-22	0.icl2	Muc1
Macir	9.78844624994966e-27	-0.940137	0.083	0.177	1.61998785436667e-22	0.icl2	Macir
Lpgat1	9.91118576527817e-27	-0.98651	0.075	0.164	1.64030124415354e-22	0.icl2	Lpgat1
Tspan32	9.9593449277025e-27	0.806789	0.318	0.229	1.64827158553476e-22	0.icl2	Tspan32
Mgst1	1.0376109274288e-26	-8.90561	0	0.04	1.71724608489466e-22	0.icl2	Mgst1
Tmcc1	1.13081135784812e-26	-0.86224	0.293	0.429	1.87149279723864e-22	0.icl2	Tmcc1
Arhgef28	1.33427979604716e-26	-6.68529	0.001	0.042	2.20823306245806e-22	0.icl2	Arhgef28
Nr2f6	1.34427440602628e-26	-2.53129	0.009	0.059	2.22477414197349e-22	0.icl2	Nr2f6
Sorl1	1.3607899482833e-26	-1.07187	0.292	0.427	2.25210736440886e-22	0.icl2	Sorl1
Carhsp1	1.38336175746126e-26	-1.8862	0.018	0.076	2.28946370859839e-22	0.icl2	Carhsp1
Il9r	1.49439671893442e-26	-4.93002	0.002	0.045	2.47322656983647e-22	0.icl2	Il9r
Aldh3b1	1.56134227274059e-26	-4.42151	0.002	0.044	2.58402146138568e-22	0.icl2	Aldh3b1
Cd300lb	1.60139670358963e-26	-7.15093	0	0.041	2.65031154444084e-22	0.icl2	Cd300lb
Rab27b	1.64094431433393e-26	-4.45219	0.003	0.046	2.71576284022265e-22	0.icl2	Rab27b
Mitd1	1.69636307134387e-26	0.972101	0.275	0.192	2.8074808830741e-22	0.icl2	Mitd1
Dclre1c	1.73579241871724e-26	-1.0721	0.115	0.216	2.87273645297703e-22	0.icl2	Dclre1c
Dnajc9	2.335987377575e-26	0.844091	0.349	0.274	3.86605910988663e-22	0.icl2	Dnajc9
Iftap	2.42272586250525e-26	-3.75641	0.002	0.045	4.0096113024462e-22	0.icl2	Iftap
Itpr2	2.62570451808189e-26	0.405524	0.591	0.534	4.34554097742553e-22	0.icl2	Itpr2
Lrig1	2.74491057471789e-26	1.00121	0.126	0.059	4.54282700115812e-22	0.icl2	Lrig1
Irf4	2.79372440841462e-26	-1.56124	0.031	0.097	4.62361389592619e-22	0.icl2	Irf4
Agtrap	2.88514101392137e-26	-0.985791	0.05	0.127	4.77490837803987e-22	0.icl2	Agtrap
Nfat5	2.9942471681185e-26	-0.837902	0.269	0.4	4.95547906323611e-22	0.icl2	Nfat5
Nrip1	3.12271154525693e-26	0.36216	0.555	0.465	5.16808760740022e-22	0.icl2	Nrip1
Slco5a1	3.22794777542662e-26	-5.91996	0.002	0.044	5.34225356833105e-22	0.icl2	Slco5a1
Stk3	3.49296434612856e-26	-0.985056	0.084	0.175	5.78085599284277e-22	0.icl2	Stk3
Siah2	3.50564346079237e-26	-0.6833	0.133	0.243	5.80183992761138e-22	0.icl2	Siah2
Prkar2a	3.6733519655756e-26	-1.36589	0.045	0.12	6.07939750302762e-22	0.icl2	Prkar2a
Tspan9	4.00361679869641e-26	1.95061	0.081	0.03	6.62598580184255e-22	0.icl2	Tspan9
Esyt2	4.24817600052697e-26	0.359647	0.704	0.636	7.03073128087213e-22	0.icl2	Esyt2
Gpm6b	4.48504689606426e-26	-5.35173	0.003	0.045	7.42275261298635e-22	0.icl2	Gpm6b
Sox13	5.2197722726207e-26	-1.3942	0.044	0.116	8.63872311118727e-22	0.icl2	Sox13
Sbno2	5.49831253178811e-26	-1.47628	0.104	0.199	9.09970724010932e-22	0.icl2	Sbno2
Kcnc1	5.99089920283486e-26	-2.2266	0.014	0.068	9.9149381806917e-22	0.icl2	Kcnc1
Gtf2a1	6.23823930610656e-26	-1.0961	0.172	0.288	1.03242860516064e-21	0.icl2	Gtf2a1
Reep3	6.56637629848931e-26	-0.660578	0.159	0.275	1.08673527739998e-21	0.icl2	Reep3
Cyb5r3	6.58686734861597e-26	-0.871013	0.084	0.176	1.09012654619594e-21	0.icl2	Cyb5r3
Sytl2	6.69210178593867e-26	-1.21222	0.062	0.142	1.10754284557285e-21	0.icl2	Sytl2
Klra1	6.7241837420133e-26	-5.93278	0.001	0.042	1.1128524093032e-21	0.icl2	Klra1
Ctsd	6.82191617049149e-26	-0.681165	0.394	0.535	1.12902712621634e-21	0.icl2	Ctsd
Nqo2	7.22000318093789e-26	-1.4526	0.024	0.085	1.19491052644522e-21	0.icl2	Nqo2
Ifi214	7.54716033380895e-26	1.31919	0.146	0.076	1.24905503524538e-21	0.icl2	Ifi214
Cables1	7.96117070280518e-26	-2.61959	0.014	0.067	1.31757375131426e-21	0.icl2	Cables1
Kif13b	8.17931117136321e-26	-0.783902	0.215	0.338	1.35367599886061e-21	0.icl2	Kif13b
Cacna1d	8.52226795237448e-26	-3.39155	0.005	0.049	1.41043534611798e-21	0.icl2	Cacna1d
1700113H08Rik	1.00002523692572e-25	-9.15378	0	0.039	1.65504176711206e-21	0.icl2	1700113H08Rik
Rps5	1.05564592340007e-25	0.195367	0.996	0.919	1.74709400322711e-21	0.icl2	Rps5
Slc12a7	1.09353196300711e-25	0.915412	0.288	0.206	1.80979539877677e-21	0.icl2	Slc12a7
Chd2	1.15193786310558e-25	0.298071	0.78	0.72	1.90645716343973e-21	0.icl2	Chd2
Usp3	1.27035984909304e-25	0.511991	0.562	0.511	2.10244555024898e-21	0.icl2	Usp3
Micu1	1.51121820909945e-25	-1.00369	0.101	0.197	2.50106613605959e-21	0.icl2	Micu1
Dennd4c	1.5182957454739e-25	-0.66139	0.185	0.303	2.51277945875931e-21	0.icl2	Dennd4c
Ablim3	1.56168325890562e-25	-6.53488	0	0.039	2.58458579348879e-21	0.icl2	Ablim3
Lair1	1.61604878910261e-25	-2.56263	0.033	0.096	2.67456074596483e-21	0.icl2	Lair1
Selenon	1.90741575419589e-25	-2.93879	0.009	0.058	3.1567730731942e-21	0.icl2	Selenon
Dok2	1.95055585773914e-25	-0.666016	0.151	0.263	3.22816994455828e-21	0.icl2	Dok2
Slc7a7	2.00046951224935e-25	-3.71478	0.004	0.047	3.31077704277267e-21	0.icl2	Slc7a7
Gpr35	2.01684912437352e-25	-6.97747	0	0.039	3.33788530083818e-21	0.icl2	Gpr35
Tnrc18	2.06731410958746e-25	-0.988035	0.124	0.227	3.42140485136725e-21	0.icl2	Tnrc18
Arhgef10l	2.08513249581767e-25	-6.50921	0	0.039	3.45089428057825e-21	0.icl2	Arhgef10l
Gphn	2.12960659150419e-25	-0.897461	0.75	0.846	3.52449890893944e-21	0.icl2	Gphn
Rnf13	2.50450328622518e-25	-0.613254	0.18	0.303	4.14495293870267e-21	0.icl2	Rnf13
Rgl1	2.58638406598773e-25	-1.74986	0.031	0.095	4.2804656292097e-21	0.icl2	Rgl1
Kdm4d	2.61513434032038e-25	-1.26023	0.035	0.101	4.32804733323022e-21	0.icl2	Kdm4d
Cwc25	2.65778874020637e-25	-1.06261	0.115	0.213	4.39864036504155e-21	0.icl2	Cwc25
Ly6d	2.73801769493623e-25	-3.27129	0.026	0.084	4.53141928511947e-21	0.icl2	Ly6d
Upp1	2.73952352052647e-25	-6.84886	0	0.039	4.53391142647131e-21	0.icl2	Upp1
Tm6sf1	2.78680399140844e-25	-0.819747	0.179	0.294	4.61216060578097e-21	0.icl2	Tm6sf1
Ifit1bl1	2.7888455419579e-25	2.42735	0.06	0.018	4.61553937194032e-21	0.icl2	Ifit1bl1
Impa2	3.20517640498033e-25	-0.981458	0.053	0.13	5.30456695024245e-21	0.icl2	Impa2
Raph1	3.24547010844712e-25	-1.23253	0.044	0.114	5.37125302947998e-21	0.icl2	Raph1
Sh3bgrl2	3.36122913639029e-25	-3.13221	0.005	0.049	5.56283422072592e-21	0.icl2	Sh3bgrl2
Klhl3	3.38354652099974e-25	2.09015	0.071	0.024	5.59976949225456e-21	0.icl2	Klhl3
Tnrc6b	3.39055476795989e-25	0.268524	0.803	0.768	5.61136814097362e-21	0.icl2	Tnrc6b
Grm8	3.61033970071258e-25	-7.08737	0.002	0.042	5.97511220467932e-21	0.icl2	Grm8
Hcar2	3.69511268680658e-25	-6.11663	0.001	0.041	6.11541149666489e-21	0.icl2	Hcar2
Mettl23	3.74263316194433e-25	0.55241	0.505	0.458	6.19405788301787e-21	0.icl2	Mettl23
Abhd17b	4.35480331362173e-25	-0.658502	0.278	0.413	7.20719948404396e-21	0.icl2	Abhd17b
Rnf130	4.42481417037563e-25	-0.64558	0.203	0.326	7.32306745197166e-21	0.icl2	Rnf130
Gem	4.84744394732112e-25	-0.88478	0.394	0.497	8.02251973281645e-21	0.icl2	Gem
Itpripl2	4.85301324137673e-25	-3.31962	0.004	0.046	8.0317369144785e-21	0.icl2	Itpripl2
Dexi	5.06253158111741e-25	-0.937577	0.068	0.152	8.37848976674931e-21	0.icl2	Dexi
Tubb6	5.66250138276248e-25	-5.92005	0.001	0.039	9.3714397884719e-21	0.icl2	Tubb6
Ctla2b	5.71615694110998e-25	-2.11238	0.015	0.069	9.46023973753702e-21	0.icl2	Ctla2b
Prkra	5.80571052252109e-25	-1.89011	0.015	0.069	9.6084509147724e-21	0.icl2	Prkra
Bmp2k	6.15616659765832e-25	-1.6674	0.167	0.269	1.01884557191245e-20	0.icl2	Bmp2k
Spns3	6.23135123936931e-25	-2.08532	0.022	0.079	1.03128863011562e-20	0.icl2	Spns3
Retnlg	6.62328908440932e-25	-7.48267	0.006	0.05	1.09615434346974e-20	0.icl2	Retnlg
Tmbim1	6.79116007873895e-25	-2.34193	0.009	0.057	1.1239369930313e-20	0.icl2	Tmbim1
Ptpn3	6.91122864862518e-25	-3.41402	0.007	0.052	1.14380834134747e-20	0.icl2	Ptpn3
Adipor1	6.98975151684819e-25	-0.87675	0.185	0.307	1.15680387603838e-20	0.icl2	Adipor1
Arl6ip5	7.03817146521083e-25	0.299519	0.709	0.658	1.16481737749239e-20	0.icl2	Arl6ip5
Ppt1	7.19885058019458e-25	-1.53194	0.152	0.257	1.1914097710222e-20	0.icl2	Ppt1
Cacnb3	7.23871082011334e-25	-10.1333	0	0.037	1.19800664072876e-20	0.icl2	Cacnb3
Adgre4	7.28026670232061e-25	-4.57402	0.002	0.041	1.20488413923406e-20	0.icl2	Adgre4
Cmpk1	8.12974118958315e-25	-0.458258	0.257	0.401	1.34547216687601e-20	0.icl2	Cmpk1
Rin2	8.26563433655778e-25	-3.57546	0.006	0.05	1.36796248270031e-20	0.icl2	Rin2
Raet1e	8.54723787732467e-25	-0.644875	0.129	0.235	1.41456786869723e-20	0.icl2	Raet1e
Hfe	8.59087491888603e-25	-6.37147	0	0.038	1.42178979907564e-20	0.icl2	Hfe
Ccdc88c	9.1834829590021e-25	0.405262	0.574	0.511	1.51986642971485e-20	0.icl2	Ccdc88c
Smap1	9.57574812383028e-25	-0.439036	0.371	0.529	1.58478631449391e-20	0.icl2	Smap1
Cpne3	1.0055386960963e-24	-0.660545	0.115	0.216	1.66416654203938e-20	0.icl2	Cpne3
Deptor	1.04276851330369e-24	-2.41029	0.009	0.056	1.72578188951761e-20	0.icl2	Deptor
Gnb1	1.08129707592097e-24	-0.413309	0.483	0.631	1.7895466606492e-20	0.icl2	Gnb1
Shb	1.29142735326129e-24	-2.12502	0.017	0.071	2.13731226964743e-20	0.icl2	Shb
Bcar3	1.30099689829952e-24	-5.56423	0.002	0.042	2.15314986668571e-20	0.icl2	Bcar3
Parp1	1.44643406647193e-24	-0.692386	0.11	0.21	2.39384838001104e-20	0.icl2	Parp1
Gm21762	1.50361880707945e-24	-6.50721	0	0.038	2.48848912571649e-20	0.icl2	Gm21762
Rtn4	1.51148251206719e-24	-0.467552	0.389	0.54	2.5015035574712e-20	0.icl2	Rtn4
N4bp2	1.53581784735065e-24	0.939494	0.232	0.154	2.54177853736533e-20	0.icl2	N4bp2
Nxnl2	1.55567349525393e-24	-4.28481	0	0.038	2.57463963464526e-20	0.icl2	Nxnl2
Atp1a3	1.71538764821137e-24	-3.96217	0.003	0.044	2.83896655778982e-20	0.icl2	Atp1a3
Srgap2	1.73851536656985e-24	-0.676542	0.199	0.319	2.8772429316731e-20	0.icl2	Srgap2
Tigd2	1.86728606562635e-24	0.890802	0.327	0.252	3.0903584386116e-20	0.icl2	Tigd2
Uhrf1bp1l	1.94788695918171e-24	-0.574268	0.216	0.343	3.22375291744573e-20	0.icl2	Uhrf1bp1l
Myo1d	2.27311283400989e-24	-2.47752	0.018	0.071	3.76200174028637e-20	0.icl2	Myo1d
Pals2	2.36917879926809e-24	-0.788075	0.103	0.197	3.92099091278868e-20	0.icl2	Pals2
Traf1	2.4494557440506e-24	-0.700485	0.375	0.502	4.05384925640375e-20	0.icl2	Traf1
Pon2	2.52825699281217e-24	-0.588684	0.163	0.278	4.18426532310413e-20	0.icl2	Pon2
Ebf1	2.54766574955412e-24	-6.09936	0.005	0.047	4.21638681551207e-20	0.icl2	Ebf1
Ddr1	2.58179192075816e-24	-3.11552	0.003	0.044	4.27286562885475e-20	0.icl2	Ddr1
Plxdc1	2.71275231922296e-24	-1.63465	0.024	0.083	4.48960508831399e-20	0.icl2	Plxdc1
Btbd9	2.93699620695559e-24	-0.565076	0.435	0.572	4.8607287225115e-20	0.icl2	Btbd9
Dynll2	2.95635216163164e-24	-0.822204	0.091	0.183	4.89276282750036e-20	0.icl2	Dynll2
Itga1	2.97132216740848e-24	-7.80092	0	0.036	4.91753818706104e-20	0.icl2	Itga1
Ifi204	2.97373403634074e-24	-5.06258	0.001	0.04	4.92152983014393e-20	0.icl2	Ifi204
Msi2	3.23509283015889e-24	0.340637	0.683	0.635	5.35407863391296e-20	0.icl2	Msi2
Gabpb1	3.42102652436286e-24	-0.800969	0.175	0.285	5.66179889782053e-20	0.icl2	Gabpb1
Acod1	3.47258986827765e-24	-7.35109	0.001	0.04	5.74713623199952e-20	0.icl2	Acod1
Glipr1	3.54247755518805e-24	-0.666157	0.222	0.348	5.86280035383622e-20	0.icl2	Glipr1
Gstm1	3.59791424308186e-24	-2.65772	0.01	0.057	5.95454807230047e-20	0.icl2	Gstm1
Ccl9	3.88874088431184e-24	-7.21025	0.001	0.038	6.4358661635361e-20	0.icl2	Ccl9
Trim30b	4.08137548594423e-24	-4.457	0.005	0.046	6.75467642923769e-20	0.icl2	Trim30b
Optn	4.12305012884625e-24	-3.25942	0.007	0.052	6.82364796324054e-20	0.icl2	Optn
Nuak2	4.18669534646511e-24	-1.6532	0.043	0.111	6.92898079839976e-20	0.icl2	Nuak2
Tgm2	4.26758407160156e-24	-4.58713	0.002	0.041	7.06285163850058e-20	0.icl2	Tgm2
Lman1	4.63489912664877e-24	-0.74271	0.064	0.144	7.67075805460372e-20	0.icl2	Lman1
Arl5a	4.68861768745305e-24	-0.785857	0.102	0.197	7.75966227273479e-20	0.icl2	Arl5a
Mmgt2	4.74869863210697e-24	-1.0407	0.047	0.118	7.85909623613703e-20	0.icl2	Mmgt2
Pip5k1c	4.7621270676451e-24	-1.04818	0.095	0.185	7.88132029695265e-20	0.icl2	Pip5k1c
Kcnmb4	4.87359730170346e-24	-1.37425	0.028	0.089	8.06580353431923e-20	0.icl2	Kcnmb4
Mxd4	5.02609363806057e-24	-0.612943	0.158	0.27	8.31818497099025e-20	0.icl2	Mxd4
Golm2	5.56365823493211e-24	1.29413	0.139	0.073	9.20785437881265e-20	0.icl2	Golm2
Emg1	5.80976474118201e-24	0.611289	0.486	0.442	9.61516064665623e-20	0.icl2	Emg1
Fryl	6.14083275717487e-24	-0.596089	0.558	0.662	1.01630782131244e-19	0.icl2	Fryl
Pak2	6.26213527853136e-24	0.337233	0.739	0.709	1.03638338859694e-19	0.icl2	Pak2
Arid1a	6.57080067006189e-24	0.396389	0.568	0.521	1.08746751089524e-19	0.icl2	Arid1a
Irf2bp2	6.72390502214209e-24	-0.644852	0.292	0.421	1.11280628116452e-19	0.icl2	Irf2bp2
Dnajc6	6.90325587509251e-24	1.34484	0.115	0.054	1.14248884732781e-19	0.icl2	Dnajc6
Nsd3	7.02673206035483e-24	0.24545	0.75	0.697	1.16292415598872e-19	0.icl2	Nsd3
Fbrsl1	7.05320451970659e-24	-0.937781	0.151	0.26	1.16730534801144e-19	0.icl2	Fbrsl1
Sfxn1	7.18138830584397e-24	-0.791445	0.09	0.18	1.18851976461718e-19	0.icl2	Sfxn1
Sh2b3	7.82005646581418e-24	-1.2431	0.057	0.132	1.29421934509225e-19	0.icl2	Sh2b3
Rbms3	8.15842385001192e-24	-5.20796	0.001	0.038	1.35021914717697e-19	0.icl2	Rbms3
B4galnt1	8.18583702488057e-24	0.485385	0.482	0.421	1.35475602761773e-19	0.icl2	B4galnt1
Psmb9	8.65573999571873e-24	0.397149	0.546	0.48	1.43252496929145e-19	0.icl2	Psmb9
Synj2	8.79412321364616e-24	-1.37015	0.029	0.09	1.45542739185844e-19	0.icl2	Synj2
Rasgrp4	8.99842832357619e-24	-1.91388	0.024	0.081	1.48923988755186e-19	0.icl2	Rasgrp4
Rab7b	9.03534214347897e-24	-7.29574	0.001	0.037	1.49534912474577e-19	0.icl2	Rab7b
Gng10	9.08094538182241e-24	-0.688839	0.237	0.363	1.50289646069161e-19	0.icl2	Gng10
Trem1	9.18625411425405e-24	-9.21548	0	0.036	1.52032505590904e-19	0.icl2	Trem1
Phactr3	9.18625435776011e-24	-8.31688	0	0.036	1.5203250962093e-19	0.icl2	Phactr3
Ddhd1	1.00895598924203e-23	-1.12537	0.171	0.281	1.66982216219556e-19	0.icl2	Ddhd1
H2-D1	1.12614245265658e-23	-0.187449	0.994	0.955	1.86376575914663e-19	0.icl2	H2-D1
Atp5b	1.29782280630762e-23	0.291162	0.758	0.717	2.14789674443911e-19	0.icl2	Atp5b
Spcs3	1.48622935853202e-23	-0.502517	0.14	0.249	2.45970958837049e-19	0.icl2	Spcs3
Prkx	1.61149674908322e-23	-0.605257	0.16	0.27	2.66702711973273e-19	0.icl2	Prkx
Apol7e	1.61678007988875e-23	1.12801	0.244	0.164	2.67577103221587e-19	0.icl2	Apol7e
Cdc42	1.64011197679994e-23	-0.269311	0.852	0.879	2.71438532160389e-19	0.icl2	Cdc42
Akap7	1.67223175189922e-23	-1.61662	0.021	0.076	2.76754354939321e-19	0.icl2	Akap7
Cpped1	1.80813920595981e-23	-1.18871	0.034	0.097	2.99247038586348e-19	0.icl2	Cpped1
Prkcg	1.87179387345252e-23	-4.24606	0.002	0.04	3.09781886056392e-19	0.icl2	Prkcg
5031439G07Rik	1.90050486744141e-23	-1.287	0.075	0.155	3.14533555561553e-19	0.icl2	5031439G07Rik
Clec4a1	1.91804550803772e-23	-6.22787	0	0.036	3.17436531580243e-19	0.icl2	Clec4a1
Dnajb4	1.97743386970367e-23	0.596371	0.458	0.385	3.27265305435957e-19	0.icl2	Dnajb4
Rab30	1.99755263486896e-23	-4.3209	0.004	0.043	3.30594961070812e-19	0.icl2	Rab30
Trib1	2.25786615434919e-23	-1.73163	0.05	0.118	3.73676848544791e-19	0.icl2	Trib1
Zfp1	2.36341337911695e-23	1.00666	0.216	0.143	3.91144914243856e-19	0.icl2	Zfp1
Gabarap	2.50554758703233e-23	-0.482499	0.572	0.692	4.1466812565385e-19	0.icl2	Gabarap
Sla	2.60163832566173e-23	-0.613249	0.254	0.379	4.30571142897017e-19	0.icl2	Sla
Tmem205	2.60681708136552e-23	-5.07596	0	0.036	4.31428226965993e-19	0.icl2	Tmem205
Rara	2.61282109563695e-23	-0.630051	0.172	0.288	4.32421891327915e-19	0.icl2	Rara
Ranbp9	2.73542377188119e-23	0.461742	0.512	0.453	4.52712634246337e-19	0.icl2	Ranbp9
Slamf8	2.83752065281185e-23	-7.99534	0	0.035	4.69609668040361e-19	0.icl2	Slamf8
Epas1	2.87719710455583e-23	-2.44285	0.009	0.053	4.76176120803991e-19	0.icl2	Epas1
Pogk	2.96057167988965e-23	-1.52599	0.028	0.087	4.89974613021738e-19	0.icl2	Pogk
Rasa1	2.96594398798264e-23	0.48213	0.492	0.42	4.90863730011127e-19	0.icl2	Rasa1
Tgtp2	3.07123208202492e-23	1.56893	0.11	0.052	5.08288909575124e-19	0.icl2	Tgtp2
Ralgds	3.33571540133253e-23	-1.55622	0.024	0.081	5.52060898920534e-19	0.icl2	Ralgds
Hdgfl3	3.45365882730801e-23	1.04459	0.16	0.09	5.71580535919475e-19	0.icl2	Hdgfl3
Clec4a3	3.49847969069886e-23	-5.6628	0.002	0.039	5.78998388810661e-19	0.icl2	Clec4a3
Mapk3	3.72025513924593e-23	-0.870946	0.064	0.143	6.15702225545201e-19	0.icl2	Mapk3
Emp3	3.76266391894846e-23	0.247947	0.825	0.745	6.2272087858597e-19	0.icl2	Emp3
Ubc	3.89326088740461e-23	-0.295851	0.826	0.87	6.44334676865463e-19	0.icl2	Ubc
Zp1	3.91327947632603e-23	-5.16097	0.001	0.036	6.47647753331958e-19	0.icl2	Zp1
Upb1	4.19720522741696e-23	-2.92768	0.006	0.047	6.94637465137507e-19	0.icl2	Upb1
Auts2	4.41956689079728e-23	0.238162	0.249	0.156	7.31438320426949e-19	0.icl2	Auts2
Rcor3	4.88869383543983e-23	-1.41115	0.021	0.075	8.09078829765292e-19	0.icl2	Rcor3
P2ry6	4.9853451999518e-23	-7.84786	0	0.034	8.25074630592023e-19	0.icl2	P2ry6
Ifitm6	5.07282583862422e-23	-5.44514	0.002	0.039	8.39552676292308e-19	0.icl2	Ifitm6
Rela	5.18889620554324e-23	-0.601167	0.142	0.25	8.58762322017406e-19	0.icl2	Rela
Blvrb	5.20745006257966e-23	-1.2888	0.041	0.107	8.61832985356934e-19	0.icl2	Blvrb
Sesn1	5.29217864415886e-23	0.575776	0.542	0.481	8.75855565608291e-19	0.icl2	Sesn1
Idnk	5.38837728288744e-23	0.644012	0.4	0.338	8.9177644031787e-19	0.icl2	Idnk
Dzip1	5.70149240589896e-23	1.51224	0.102	0.046	9.43596993176278e-19	0.icl2	Dzip1
Sort1	5.92905234996847e-23	-2.60272	0.01	0.056	9.81258163919781e-19	0.icl2	Sort1
Agpat2	6.61078014758733e-23	-1.37446	0.025	0.081	1.0940841144257e-18	0.icl2	Agpat2
Nedd4l	7.23038729243264e-23	0.542904	0.409	0.33	1.1966290968976e-18	0.icl2	Nedd4l
Cdh2	7.65738613415986e-23	-8.32614	0	0.035	1.26729740520346e-18	0.icl2	Cdh2
Spire1	7.67151159149398e-23	-4.85657	0.003	0.04	1.26963516839225e-18	0.icl2	Spire1
Hs3st1	7.67834526396276e-23	-6.61134	0	0.035	1.27076614118584e-18	0.icl2	Hs3st1
D16Ertd472e	7.89749509517881e-23	-0.593746	0.295	0.42	1.30703543825209e-18	0.icl2	D16Ertd472e
Myo1g	8.30857928310499e-23	-0.988057	0.208	0.325	1.37506987135388e-18	0.icl2	Myo1g
Tmem30a	9.16595897226539e-23	-0.436065	0.285	0.425	1.51696620990992e-18	0.icl2	Tmem30a
Klk1	9.70583449053417e-23	-6.34832	0.001	0.036	1.60631560818341e-18	0.icl2	Klk1
Nbn	9.84776539239061e-23	-1.03354	0.049	0.118	1.62980517244065e-18	0.icl2	Nbn
Rtn1	9.876773921121e-23	-6.16576	0.001	0.036	1.63460608394552e-18	0.icl2	Rtn1
Sap30	9.97683171068767e-23	-0.807961	0.053	0.124	1.65116564811881e-18	0.icl2	Sap30
Bmp2	1.01951006146584e-22	-7.13293	0	0.035	1.68728915172596e-18	0.icl2	Bmp2
Smurf2	1.0601313015685e-22	0.688294	0.402	0.338	1.75451730409587e-18	0.icl2	Smurf2
H1f0	1.10544947722272e-22	-1.31405	0.03	0.089	1.8295188848036e-18	0.icl2	H1f0
Plscr4	1.16783777255229e-22	-2.82101	0.006	0.046	1.93277151357404e-18	0.icl2	Plscr4
Zfp385a	1.17500134132143e-22	-4.58672	0.001	0.037	1.94462721988697e-18	0.icl2	Zfp385a
Pea15a	1.20977714349177e-22	-0.729712	0.123	0.22	2.00218117247889e-18	0.icl2	Pea15a
Fcho2	1.21058497489438e-22	-0.4693	0.331	0.477	2.0035181334502e-18	0.icl2	Fcho2
Pgm2l1	1.21783304506049e-22	-0.756025	0.103	0.192	2.01551368957511e-18	0.icl2	Pgm2l1
Nupr1	1.23860171303196e-22	-4.77616	0.002	0.038	2.04988583506789e-18	0.icl2	Nupr1
Mitf	1.25948949559063e-22	-1.48683	0.027	0.084	2.08445511520249e-18	0.icl2	Mitf
Dusp10	1.27406401378355e-22	0.738805	0.35	0.272	2.10857594281178e-18	0.icl2	Dusp10
Skp1	1.274283935236e-22	0.603954	0.523	0.484	2.10893991281557e-18	0.icl2	Skp1
Rasal3	1.34712457420531e-22	0.719159	0.367	0.3	2.22949117030978e-18	0.icl2	Rasal3
Car5b	1.35796921137646e-22	-3.91238	0.002	0.039	2.24743904482804e-18	0.icl2	Car5b
Cxcr4	1.38103167123881e-22	-1.03083	0.133	0.23	2.28560741590022e-18	0.icl2	Cxcr4
Dnajb14	1.46116578024728e-22	-1.04745	0.058	0.131	2.41822936630924e-18	0.icl2	Dnajb14
Dusp16	1.52837501363135e-22	-0.981081	0.14	0.238	2.52946064755988e-18	0.icl2	Dusp16
Agpat5	1.54545736462236e-22	-0.548377	0.15	0.258	2.55773193845e-18	0.icl2	Agpat5
Slc11a1	1.5633116248161e-22	-6.13327	0.001	0.035	2.58728073907065e-18	0.icl2	Slc11a1
Cd209d	1.69807352562379e-22	-6.3669	0.001	0.036	2.81031168490737e-18	0.icl2	Cd209d
Smap2	1.71762782757099e-22	-0.546821	0.367	0.511	2.84267405462999e-18	0.icl2	Smap2
Tmsb10b	1.73231330623791e-22	1.01579	0.234	0.161	2.86697852182373e-18	0.icl2	Tmsb10b
S100a10	1.77029304643394e-22	-0.76458	0.861	0.78	2.92983499184817e-18	0.icl2	S100a10
Lpcat1	1.83966336730053e-22	-1.93889	0.015	0.064	3.04464287288237e-18	0.icl2	Lpcat1
Acvr1	1.93106293477791e-22	-2.72952	0.005	0.045	3.19590915705744e-18	0.icl2	Acvr1
Zfp521	1.9312236920475e-22	-4.02532	0.003	0.04	3.19617521033861e-18	0.icl2	Zfp521
Dhrs9	1.95157792970899e-22	-4.3907	0.005	0.045	3.22986147366838e-18	0.icl2	Dhrs9
St3gal5	1.99649793543619e-22	-2.86958	0.012	0.058	3.3042040831469e-18	0.icl2	St3gal5
Rln3	2.04331063222005e-22	-4.3226	0.001	0.037	3.38167909632419e-18	0.icl2	Rln3
Cntln	2.11686002107199e-22	-2.11198	0.018	0.069	3.50340333487415e-18	0.icl2	Cntln
Fbxw8	2.14974777668814e-22	-1.21884	0.047	0.114	3.55783257041888e-18	0.icl2	Fbxw8
Erlin1	2.19412507046707e-22	-2.25274	0.021	0.073	3.631276991623e-18	0.icl2	Erlin1
Ccdc184	2.28406571195628e-22	-5.47108	0.001	0.036	3.78012875328764e-18	0.icl2	Ccdc184
F11r	2.31633320311201e-22	-5.86406	0.001	0.036	3.83353145115038e-18	0.icl2	F11r
Macrod2	2.32473649938446e-22	-2.31221	0.009	0.053	3.84743890648129e-18	0.icl2	Macrod2
Snx20	2.50318562095813e-22	-0.758772	0.233	0.355	4.14277220268571e-18	0.icl2	Snx20
Lamp2	2.51621465810067e-22	-0.69938	0.204	0.32	4.16433525915661e-18	0.icl2	Lamp2
Pym1	2.69995261669238e-22	1.16633	0.185	0.116	4.46842158062589e-18	0.icl2	Pym1
Lipo3	2.7470655922652e-22	-1.91433	0.011	0.057	4.54639355519891e-18	0.icl2	Lipo3
Ywhaq	2.86108687846079e-22	-0.446273	0.497	0.628	4.7350987838526e-18	0.icl2	Ywhaq
Slc23a2	2.87867435285634e-22	-0.798637	0.159	0.264	4.76420605397724e-18	0.icl2	Slc23a2
Lrp1	3.07322414223224e-22	-5.42917	0.001	0.036	5.08618595539436e-18	0.icl2	Lrp1
Bach1	3.32136306491447e-22	-0.748237	0.133	0.232	5.49685587243346e-18	0.icl2	Bach1
Golim4	3.35875438335474e-22	-0.611362	0.087	0.172	5.55873850445209e-18	0.icl2	Golim4
Rab32	3.38723733949025e-22	-2.15759	0.018	0.068	5.60587779685636e-18	0.icl2	Rab32
Susd3	3.70120320876493e-22	-1.14221	0.037	0.1	6.12549131050595e-18	0.icl2	Susd3
Cmip	4.15656825205313e-22	-0.693377	0.538	0.652	6.87912045714793e-18	0.icl2	Cmip
Hspd1	4.16679134327169e-22	0.372073	0.62	0.558	6.89603967311464e-18	0.icl2	Hspd1
Arhgef11	4.26689787349845e-22	-0.89695	0.07	0.148	7.06171598063994e-18	0.icl2	Arhgef11
Phf11c	4.28213437871436e-22	1.61854	0.092	0.04	7.08693239677227e-18	0.icl2	Phf11c
Ksr1	4.29588836750262e-22	-1.07464	0.078	0.156	7.10969524821683e-18	0.icl2	Ksr1
Ncoa1	4.33578877109296e-22	-0.496558	0.273	0.406	7.17573041615885e-18	0.icl2	Ncoa1
Orai3	4.47023735438547e-22	-1.08725	0.036	0.098	7.39824282150795e-18	0.icl2	Orai3
Ikbke	4.57652218237621e-22	1.0217	0.204	0.133	7.57414421183262e-18	0.icl2	Ikbke
Slc28a2	4.78075170562155e-22	0.825935	0.254	0.177	7.91214407280367e-18	0.icl2	Slc28a2
Hnrnpll	4.89535787358594e-22	-1.00164	0.099	0.183	8.10181728078472e-18	0.icl2	Hnrnpll
Fbxo27	4.99148586463184e-22	-3.53484	0.001	0.036	8.2609091059657e-18	0.icl2	Fbxo27
Frmd5	5.09146862724098e-22	-5.18597	0.003	0.039	8.42638057808382e-18	0.icl2	Frmd5
Tomm20	5.19194286207807e-22	0.327748	0.675	0.634	8.5926654367392e-18	0.icl2	Tomm20
Arhgap22	5.37409665580473e-22	-6.27998	0.001	0.035	8.89412996535682e-18	0.icl2	Arhgap22
Mycl	5.70758021246005e-22	-5.7282	0	0.034	9.44604525162138e-18	0.icl2	Mycl
Jakmip1	5.73190791287248e-22	0.730027	0.319	0.246	9.48630759580396e-18	0.icl2	Jakmip1
Ceacam1	5.77698228413394e-22	-3.31422	0	0.034	9.56090568024167e-18	0.icl2	Ceacam1
Tspan13	5.78663562099011e-22	0.314952	0.474	0.386	9.57688195273863e-18	0.icl2	Tspan13
Il7r	5.9349265119791e-22	-1.02468	0.615	0.59	9.8223033773254e-18	0.icl2	Il7r
Lxn	5.9968327854073e-22	-1.67648	0.014	0.061	9.92475825984909e-18	0.icl2	Lxn
H2-Eb2	6.27956004734961e-22	-7.80374	0	0.033	1.03926718783636e-17	0.icl2	H2-Eb2
Il18	6.52090094143259e-22	-5.61208	0.001	0.034	1.07920910580709e-17	0.icl2	Il18
Dtnbp1	6.68964099619311e-22	-0.528363	0.177	0.292	1.10713558486996e-17	0.icl2	Dtnbp1
Pura	6.78076857118984e-22	0.439446	0.483	0.427	1.12221719853192e-17	0.icl2	Pura
Large1	6.80249340909538e-22	-1.26116	0.169	0.264	1.12581265920529e-17	0.icl2	Large1
Ehd3	6.8938330934985e-22	1.17899	0.18	0.111	1.140929376974e-17	0.icl2	Ehd3
Atp6v0d1	7.01611045779363e-22	-0.593939	0.247	0.373	1.16116628076485e-17	0.icl2	Atp6v0d1
Itm2c	7.22254178320972e-22	-0.674222	0.189	0.302	1.19533066512121e-17	0.icl2	Itm2c
Ugcg	7.32739282603938e-22	0.144148	0.638	0.527	1.21268351270952e-17	0.icl2	Ugcg
Nrxn1	7.64730408432698e-22	-7.75891	0.002	0.037	1.26562882595612e-17	0.icl2	Nrxn1
Ccnl1	8.02103865502586e-22	-0.54318	0.535	0.65	1.32748189740678e-17	0.icl2	Ccnl1
Prkag2	8.69482708562524e-22	-0.71895	0.124	0.221	1.43899388267098e-17	0.icl2	Prkag2
Eprs	8.91737674902676e-22	-0.928038	0.27	0.393	1.47582585196393e-17	0.icl2	Eprs
Mvb12a	9.01745923467478e-22	-0.660692	0.147	0.25	1.49238950333868e-17	0.icl2	Mvb12a
Dntt	9.18851715647732e-22	1.75772	0.085	0.036	1.520699589397e-17	0.icl2	Dntt
Map1b	9.57328233275329e-22	-4.1555	0.003	0.038	1.58437822607067e-17	0.icl2	Map1b
Pmaip1	9.71511765586349e-22	-1.18756	0.147	0.239	1.60785197204541e-17	0.icl2	Pmaip1
Mical3	1.05818289606232e-21	-2.2797	0.045	0.107	1.75129269298314e-17	0.icl2	Mical3
Adgrg6	1.10777910745739e-21	-5.5324	0.004	0.04	1.83337442284199e-17	0.icl2	Adgrg6
Klri1	1.11715081085017e-21	-5.19415	0.002	0.037	1.84888459195702e-17	0.icl2	Klri1
Tbc1d15	1.11722761083294e-21	-0.634561	0.241	0.368	1.84901169592851e-17	0.icl2	Tbc1d15
Srgn	1.12875940435066e-21	-0.572681	0.915	0.909	1.86809681420035e-17	0.icl2	Srgn
Tdrd3	1.16457207949541e-21	-0.854259	0.072	0.149	1.92736679156491e-17	0.icl2	Tdrd3
Dusp22	1.19833163985694e-21	-1.37752	0.021	0.072	1.98323886396324e-17	0.icl2	Dusp22
Txnrd1	1.25902595938156e-21	-0.735991	0.159	0.263	2.08368796277649e-17	0.icl2	Txnrd1
Card6	1.28189433170003e-21	1.09803	0.189	0.119	2.12153511896355e-17	0.icl2	Card6
Hk3	1.29675639351205e-21	-3.02766	0.007	0.048	2.14613183126245e-17	0.icl2	Hk3
Ube2d2a	1.29701548885625e-21	0.381111	0.559	0.519	2.14656063405709e-17	0.icl2	Ube2d2a
Rnf180	1.29716652146936e-21	-5.19651	0.001	0.035	2.14681059303179e-17	0.icl2	Rnf180
Stk32c	1.33428779133416e-21	-4.00874	0.003	0.038	2.20824629465803e-17	0.icl2	Stk32c
Msn	1.34610000499e-21	0.270416	0.78	0.744	2.22779550825845e-17	0.icl2	Msn
Ctnnd2	1.41835335276593e-21	-2.94414	0.005	0.043	2.34737479882761e-17	0.icl2	Ctnnd2
Mob1a	1.44111297674381e-21	-0.458946	0.25	0.386	2.385041976511e-17	0.icl2	Mob1a
Zcchc7	1.49990841369443e-21	0.260916	0.756	0.709	2.48234842466428e-17	0.icl2	Zcchc7
Nipal1	1.6105488491958e-21	1.59228	0.077	0.031	2.66545834541906e-17	0.icl2	Nipal1
Hs3st3b1	1.61980540661595e-21	-0.750336	0.094	0.178	2.6807779479494e-17	0.icl2	Hs3st3b1
Gpr174	1.74498806623715e-21	0.782664	0.28	0.198	2.88795524962248e-17	0.icl2	Gpr174
Actr10	1.78623355494655e-21	0.696463	0.39	0.335	2.95621653343654e-17	0.icl2	Actr10
Rufy3	1.80327928741214e-21	-1.35085	0.045	0.109	2.98442722066709e-17	0.icl2	Rufy3
Tmem243	1.8706637022816e-21	-0.464933	0.25	0.382	3.09594842727605e-17	0.icl2	Tmem243
Cdc42ep2	1.88789555541859e-21	-4.8803	0.001	0.035	3.12446714421776e-17	0.icl2	Cdc42ep2
Atp11b	1.91511218713182e-21	0.229564	0.663	0.592	3.16951066970316e-17	0.icl2	Atp11b
Mefv	1.93338877229961e-21	-8.06287	0	0.032	3.19975841815585e-17	0.icl2	Mefv
Tdrkh	1.93657589976553e-21	-1.31633	0.026	0.08	3.20503311411196e-17	0.icl2	Tdrkh
Bicral	1.97721134506228e-21	-0.723931	0.103	0.191	3.27228477607807e-17	0.icl2	Bicral
Adrb1	1.98546904390815e-21	-5.17811	0.001	0.034	3.28595126766799e-17	0.icl2	Adrb1
Sik1	2.0452441804118e-21	-0.628485	0.34	0.457	3.38487911858153e-17	0.icl2	Sik1
Dab2ip	2.08381398828266e-21	-4.06404	0.002	0.036	3.4487121506078e-17	0.icl2	Dab2ip
Camk4	2.14624900461169e-21	0.134618	0.551	0.427	3.55204210263234e-17	0.icl2	Camk4
Add1	2.16087062035361e-21	0.556259	0.435	0.377	3.57624087668522e-17	0.icl2	Add1
Abr	2.39582837581343e-21	-0.882281	0.149	0.247	3.96509596197123e-17	0.icl2	Abr
Slc40a1	2.56070627404618e-21	-9.51793	0	0.032	4.23796888354643e-17	0.icl2	Slc40a1
Idh2	2.59041007434592e-21	1.19525	0.173	0.108	4.2871286730425e-17	0.icl2	Idh2
Rheb	2.61007539988431e-21	-0.46154	0.323	0.469	4.31967478680854e-17	0.icl2	Rheb
Gng12	2.6307849392466e-21	-0.827966	0.135	0.23	4.35394907445312e-17	0.icl2	Gng12
Calm1	2.73755025409549e-21	-0.290444	0.922	0.898	4.53064567052803e-17	0.icl2	Calm1
Mgll	2.78829661853255e-21	-4.16848	0.002	0.036	4.61463090367137e-17	0.icl2	Mgll
Gkap1	2.91285664810151e-21	-2.51165	0.006	0.045	4.820777752608e-17	0.icl2	Gkap1
Cebpa	2.94896977736242e-21	-3.95104	0.002	0.037	4.8805449815348e-17	0.icl2	Cebpa
Dctn1	3.03127296602812e-21	-0.655989	0.108	0.2	5.01675675877654e-17	0.icl2	Dctn1
Iqsec1	3.11815364146101e-21	-0.86652	0.154	0.254	5.16054427661797e-17	0.icl2	Iqsec1
Mef2a	3.1514999264823e-21	-0.5342	0.376	0.509	5.21573237832821e-17	0.icl2	Mef2a
Nlrp1b	3.17019975227693e-21	-3.53844	0.009	0.051	5.24668059001832e-17	0.icl2	Nlrp1b
Frmd8	3.20723971142543e-21	0.943012	0.239	0.17	5.30798172240909e-17	0.icl2	Frmd8
Ier2	3.23526822899576e-21	-0.50952	0.54	0.643	5.35436891898798e-17	0.icl2	Ier2
Slc7a6os	3.29498714084268e-21	-0.966307	0.134	0.226	5.45320371809463e-17	0.icl2	Slc7a6os
Slc9a1	3.39423363894795e-21	-0.74289	0.117	0.209	5.61745667245885e-17	0.icl2	Slc9a1
Arap2	3.41833587750188e-21	0.253342	0.579	0.495	5.6573458772656e-17	0.icl2	Arap2
Hivep3	3.58106909638352e-21	-1.09522	0.067	0.139	5.92666935451472e-17	0.icl2	Hivep3
St6galnac6	3.76595594643561e-21	-2.37141	0.006	0.046	6.23265709135094e-17	0.icl2	St6galnac6
B9d2	4.09414681447199e-21	-0.732444	0.068	0.143	6.77581297795114e-17	0.icl2	B9d2
Tent5a	4.34103599102764e-21	0.692171	0.308	0.228	7.18441456515075e-17	0.icl2	Tent5a
Tet2	4.39914036511271e-21	-0.777056	0.192	0.302	7.28057730426154e-17	0.icl2	Tet2
Hspa2	4.53636823255606e-21	-1.93345	0.017	0.064	7.50768942488028e-17	0.icl2	Hspa2
Clcn5	4.69215277048083e-21	-0.972767	0.058	0.127	7.76551283514577e-17	0.icl2	Clcn5
Ppp1r13b	4.74679891436541e-21	0.632976	0.34	0.267	7.85595220327475e-17	0.icl2	Ppp1r13b
Trim12a	4.92090730893794e-21	0.465157	0.463	0.402	8.14410159629228e-17	0.icl2	Trim12a
Dennd2b	4.99582108193061e-21	-4.23202	0.002	0.036	8.26808389059516e-17	0.icl2	Dennd2b
Zfhx2	6.04212557153637e-21	-0.959129	0.051	0.118	9.9997178208927e-17	0.icl2	Zfhx2
Arhgap28	6.30691459353126e-21	-5.25723	0.003	0.038	1.04379436522942e-16	0.icl2	Arhgap28
Immp2l	6.38480799253517e-21	-0.715877	0.227	0.335	1.05668572276457e-16	0.icl2	Immp2l
Alpk1	6.54935220619088e-21	-3.19714	0.008	0.047	1.08391779012459e-16	0.icl2	Alpk1
Zfp644	7.60729133658856e-21	0.437886	0.534	0.492	1.25900671620541e-16	0.icl2	Zfp644
Paip2	7.67286054375395e-21	0.368173	0.66	0.648	1.26985841999128e-16	0.icl2	Paip2
Gapt	7.87584892019455e-21	-7.10557	0	0.031	1.3034529962922e-16	0.icl2	Gapt
Arrdc4	8.20074896983267e-21	-3.23376	0.005	0.043	1.35722395450731e-16	0.icl2	Arrdc4
Il1rn	8.20689297845831e-21	-4.27675	0.001	0.033	1.35824078793485e-16	0.icl2	Il1rn
Itgav	9.039847149609e-21	-0.790685	0.202	0.308	1.49609470326029e-16	0.icl2	Itgav
Vamp8	9.31498362475431e-21	-0.492013	0.356	0.495	1.54162978989684e-16	0.icl2	Vamp8
Nabp1	1.01228461789212e-20	-0.656501	0.34	0.456	1.67533104261146e-16	0.icl2	Nabp1
S1pr5	1.0487250388653e-20	-5.63292	0.001	0.032	1.73563993932206e-16	0.icl2	S1pr5
Itgad	1.08510492900295e-20	-5.21971	0.001	0.032	1.79584865749988e-16	0.icl2	Itgad
Txndc17	1.17277747815143e-20	-0.502176	0.293	0.433	1.94094672634062e-16	0.icl2	Txndc17
Nxpe4	1.19662930599349e-20	-4.17415	0.002	0.036	1.98042150141922e-16	0.icl2	Nxpe4
Ddx60	1.20116168083891e-20	0.873109	0.169	0.102	1.98792258178839e-16	0.icl2	Ddx60
Wdr95	1.20224191642152e-20	-1.36819	0.028	0.083	1.98971037167761e-16	0.icl2	Wdr95
Rtp4	1.28252189202979e-20	0.980124	0.137	0.075	2.1225737313093e-16	0.icl2	Rtp4
Fam184b	1.34580577531945e-20	-5.38391	0.002	0.036	2.22730855815369e-16	0.icl2	Fam184b
Pde4dip	1.36382261991135e-20	-1.29045	0.067	0.139	2.25712643595329e-16	0.icl2	Pde4dip
Paqr5	1.38931777639315e-20	-2.99186	0.004	0.039	2.29932091993066e-16	0.icl2	Paqr5
Mboat1	1.42709813388925e-20	1.06701	0.165	0.099	2.36184741158671e-16	0.icl2	Mboat1
Casp8	1.59845809675997e-20	0.614201	0.402	0.344	2.64544815013775e-16	0.icl2	Casp8
B4galt6	1.65014163233411e-20	-6.07346	0	0.031	2.73098440151294e-16	0.icl2	B4galt6
Il4	1.67406291141973e-20	-4.28774	0.001	0.033	2.77057411839965e-16	0.icl2	Il4
Canx	1.97516391216965e-20	-0.45061	0.364	0.499	3.26889627464077e-16	0.icl2	Canx
Epcam	2.02441828027582e-20	-1.86396	0.017	0.063	3.35041225385648e-16	0.icl2	Epcam
Or2v1	2.03184778697571e-20	1.56404	0.095	0.044	3.3627080874448e-16	0.icl2	Or2v1
Zc2hc1a	2.04157204749e-20	-2.42472	0.009	0.049	3.37880173859596e-16	0.icl2	Zc2hc1a
Tnip2	2.10048359221006e-20	-1.7106	0.026	0.078	3.47630034510765e-16	0.icl2	Tnip2
Paxbp1	2.15602665211714e-20	-1.1234	0.216	0.325	3.56822410925386e-16	0.icl2	Paxbp1
Card10	2.18196803800244e-20	-6.42839	0	0.031	3.61115710289404e-16	0.icl2	Card10
Tbc1d4	2.24011117108707e-20	-2.90776	0.099	0.172	3.7073839881491e-16	0.icl2	Tbc1d4
Dcxr	2.27942931108995e-20	-1.13524	0.033	0.09	3.77245550985387e-16	0.icl2	Dcxr
Ston2	2.32688173447238e-20	-2.01994	0.026	0.077	3.85098927055179e-16	0.icl2	Ston2
Nrarp	2.3425748237774e-20	-2.07669	0.009	0.05	3.87696133335159e-16	0.icl2	Nrarp
Iffo2	2.38253619621267e-20	-0.865116	0.063	0.134	3.94309740473196e-16	0.icl2	Iffo2
Gse1	2.44434735964839e-20	-0.595921	0.172	0.278	4.04539488021809e-16	0.icl2	Gse1
Cd53	2.51150992175672e-20	0.25407	0.786	0.747	4.15654892050737e-16	0.icl2	Cd53
Igtp	2.52883049548393e-20	1.22731	0.166	0.102	4.18521447002591e-16	0.icl2	Igtp
Itgb4	2.60315576247946e-20	-4.8211	0.001	0.032	4.30822278690351e-16	0.icl2	Itgb4
Cyba	2.62625113138633e-20	-0.406549	0.85	0.861	4.34644562244438e-16	0.icl2	Cyba
Azin1	2.69384411196857e-20	-0.559523	0.247	0.366	4.45831200530798e-16	0.icl2	Azin1
Pgpep1l	2.70735486893384e-20	1.92736	0.064	0.024	4.4806723080855e-16	0.icl2	Pgpep1l
Gclc	2.7116039783467e-20	-0.95313	0.192	0.296	4.48770458416378e-16	0.icl2	Gclc
Scn1b	2.8884202545977e-20	-5.79217	0	0.031	4.7803355213592e-16	0.icl2	Scn1b
Nup98	2.90203419632027e-20	-0.796702	0.295	0.412	4.80286659491004e-16	0.icl2	Nup98
Sirpb1a	2.90306582002037e-20	-5.59354	0	0.031	4.8045739321337e-16	0.icl2	Sirpb1a
Disc1	2.91345128397889e-20	-1.07518	0.048	0.112	4.82176187498506e-16	0.icl2	Disc1
Anxa7	2.94175657724739e-20	-0.563746	0.095	0.18	4.86860713534444e-16	0.icl2	Anxa7
Cxcl10	3.04741113689938e-20	-2.15635	0.033	0.087	5.04346543156847e-16	0.icl2	Cxcl10
Wfdc21	3.1210973196535e-20	-8.4747	0.001	0.032	5.16541606402655e-16	0.icl2	Wfdc21
Kcna2	3.13709023169637e-20	2.18189	0.036	0.008	5.19188433345749e-16	0.icl2	Kcna2
Racgap1	3.21027231899831e-20	-1.10952	0.035	0.092	5.3130006879422e-16	0.icl2	Racgap1
Apol7c	3.42314527865931e-20	-7.66428	0.001	0.032	5.66530543618117e-16	0.icl2	Apol7c
Ggact	3.52282007854812e-20	1.24142	0.158	0.096	5.83026722999713e-16	0.icl2	Ggact
Kpna1	3.55702931016455e-20	-0.562251	0.262	0.383	5.88688350832233e-16	0.icl2	Kpna1
Dgat2	3.63990955538498e-20	-3.59594	0.004	0.039	6.02405031416215e-16	0.icl2	Dgat2
H2bc4	3.76998107524581e-20	-1.59407	0.057	0.122	6.23931867953182e-16	0.icl2	H2bc4
Cdh22	3.80984119771654e-20	-4.7354	0.001	0.032	6.30528718222088e-16	0.icl2	Cdh22
Tgoln1	3.95065678983048e-20	-0.463788	0.301	0.434	6.53833698716944e-16	0.icl2	Tgoln1
Sh3bp2	4.19994322070991e-20	-2.10727	0.012	0.053	6.95090603027491e-16	0.icl2	Sh3bp2
Uap1l1	4.57930633453747e-20	-1.25835	0.025	0.077	7.57875198365952e-16	0.icl2	Uap1l1
Matn2	4.59138820343409e-20	-3.97873	0.002	0.035	7.59874747668341e-16	0.icl2	Matn2
Spaca9	5.3320748936616e-20	-3.26597	0.003	0.037	8.82458394900994e-16	0.icl2	Spaca9
Fam204a	5.34629636304819e-20	-0.550123	0.189	0.296	8.84812048084476e-16	0.icl2	Fam204a
Pik3r6	5.79528617929283e-20	-5.50363	0.001	0.031	9.59119862672963e-16	0.icl2	Pik3r6
Kcnk7	5.80416010299414e-20	-4.73521	0.001	0.031	9.6058849704553e-16	0.icl2	Kcnk7
Cdk2ap1	5.81467665008949e-20	-0.664926	0.062	0.133	9.62328985589811e-16	0.icl2	Cdk2ap1
Myo16	6.12602855361293e-20	-3.006	0.005	0.04	1.01385772562294e-15	0.icl2	Myo16
Prkab2	6.37521909814813e-20	-1.46919	0.023	0.072	1.05509876074352e-15	0.icl2	Prkab2
Gusb	6.77991769333465e-20	-1.09617	0.076	0.151	1.12207637824688e-15	0.icl2	Gusb
Hmox1	7.0922627037659e-20	-3.42958	0.005	0.041	1.17376947747326e-15	0.icl2	Hmox1
Lyl1	7.21127784510724e-20	-4.68806	0.001	0.033	1.19346648336525e-15	0.icl2	Lyl1
M6pr	7.329932512763e-20	-0.531203	0.258	0.382	1.21310383086228e-15	0.icl2	M6pr
Cacybp	7.36827693650691e-20	0.517439	0.488	0.447	1.21944983299189e-15	0.icl2	Cacybp
Scart2	7.56617957207753e-20	0.158439	0.154	0.085	1.25220271917883e-15	0.icl2	Scart2
Ikbip	7.5948481450321e-20	-1.87685	0.011	0.052	1.25694736800281e-15	0.icl2	Ikbip
Ssh1	7.7665660204821e-20	-0.985816	0.057	0.124	1.28536667638979e-15	0.icl2	Ssh1
Laptm4b	8.98542416728031e-20	-1.45557	0.029	0.083	1.48708769968489e-15	0.icl2	Laptm4b
Itgb7	9.13849943253716e-20	0.284981	0.617	0.55	1.5124216560849e-15	0.icl2	Itgb7
Prss12	9.26505486302078e-20	-1.0019	0.046	0.107	1.53336657982994e-15	0.icl2	Prss12
Gadd45g	9.34707374615428e-20	-1.07662	0.08	0.154	1.54694070498853e-15	0.icl2	Gadd45g
Gm14325	1.03443370561365e-19	-1.04129	0.033	0.088	1.71198778279059e-15	0.icl2	Gm14325
H3f3b	1.04144354883982e-19	-0.406655	0.988	0.954	1.72358907332991e-15	0.icl2	H3f3b
Tmem65	1.06428710766004e-19	-0.592134	0.093	0.175	1.76139516317737e-15	0.icl2	Tmem65
Hspa13	1.06768508469022e-19	-1.05541	0.042	0.102	1.76701881516232e-15	0.icl2	Hspa13
Trim30c	1.09251195379936e-19	2.07268	0.061	0.022	1.80810728353794e-15	0.icl2	Trim30c
Cd274	1.10166407645252e-19	-1.00952	0.174	0.269	1.82325404652893e-15	0.icl2	Cd274
Ldlrap1	1.10809462731625e-19	0.965158	0.195	0.129	1.83389660820839e-15	0.icl2	Ldlrap1
Slc35e2	1.12025658846329e-19	0.783592	0.317	0.255	1.85402465390674e-15	0.icl2	Slc35e2
Baiap2	1.14495363450123e-19	-1.11203	0.067	0.137	1.89489826509953e-15	0.icl2	Baiap2
Dna2	1.25085806905554e-19	-3.48502	0.003	0.036	2.07017010428692e-15	0.icl2	Dna2
Abhd8	1.25201625893256e-19	0.794543	0.278	0.212	2.07208690853339e-15	0.icl2	Abhd8
Plekhf1	1.30198293467042e-19	-7.18121	0	0.029	2.15478175687954e-15	0.icl2	Plekhf1
Ryk	1.30198294610116e-19	-6.96156	0	0.029	2.15478177579741e-15	0.icl2	Ryk
Itpr1	1.38492179684212e-19	-0.633745	0.328	0.441	2.2920455737737e-15	0.icl2	Itpr1
Akr1e1	1.39723984402946e-19	-1.56867	0.016	0.06	2.31243194186876e-15	0.icl2	Akr1e1
Slc7a8	1.4110615200674e-19	-3.58287	0.004	0.038	2.33530681571155e-15	0.icl2	Slc7a8
Gm5127	1.45135672574193e-19	-3.82705	0.002	0.034	2.40199538110289e-15	0.icl2	Gm5127
Adam22	1.5000375709876e-19	-5.20474	0.001	0.031	2.48256217998447e-15	0.icl2	Adam22
Gpc1	1.50548077923324e-19	-2.50554	0.005	0.04	2.49157068963101e-15	0.icl2	Gpc1
Cdkn2d	1.60144891043501e-19	0.688061	0.336	0.271	2.65039794676995e-15	0.icl2	Cdkn2d
Rab43	1.61804250744062e-19	-2.57921	0.015	0.059	2.67786034981422e-15	0.icl2	Rab43
Fbxo17	1.62162718873609e-19	-1.42285	0.019	0.065	2.68379299735823e-15	0.icl2	Fbxo17
Ahsa1	1.63075333709787e-19	0.573205	0.43	0.386	2.69889677289698e-15	0.icl2	Ahsa1
P2ry1	1.66286578544188e-19	-3.1539	0.003	0.036	2.75204287490632e-15	0.icl2	P2ry1
Map7d1	1.82084114462198e-19	-0.661327	0.102	0.186	3.01349209434938e-15	0.icl2	Map7d1
Cnih4	1.9426129694195e-19	-0.371898	0.144	0.245	3.21502446438928e-15	0.icl2	Cnih4
Sh2d1a	1.98621060214272e-19	0.434809	0.326	0.236	3.28717854654621e-15	0.icl2	Sh2d1a
Bbc3	2.01326193330548e-19	-1.03227	0.061	0.128	3.33194849962057e-15	0.icl2	Bbc3
Rab11a	2.09033649908386e-19	-0.541061	0.206	0.318	3.45950690598379e-15	0.icl2	Rab11a
Casp3	2.18941837776221e-19	-0.981638	0.07	0.14	3.62348741519646e-15	0.icl2	Casp3
Fkbp3	2.24663519218754e-19	0.337005	0.599	0.551	3.71818124307038e-15	0.icl2	Fkbp3
Mmd	2.54511506560673e-19	-0.745979	0.122	0.209	4.21216543357914e-15	0.icl2	Mmd
Ldlrad4	2.656747076538e-19	0.355461	0.626	0.566	4.3969164116704e-15	0.icl2	Ldlrad4
Ckap4	2.67635782635133e-19	-3.63838	0.003	0.035	4.42937220261145e-15	0.icl2	Ckap4
Rbm38	2.67804397527385e-19	0.8181	0.25	0.185	4.43216277907822e-15	0.icl2	Rbm38
Heatr9	2.70725503883208e-19	-2.25895	0.01	0.05	4.4805070892671e-15	0.icl2	Heatr9
Cds1	2.75771567352248e-19	-4.19059	0.001	0.031	4.5640194396797e-15	0.icl2	Cds1
Fuca2	2.809143157008e-19	-0.807976	0.066	0.135	4.64913192484824e-15	0.icl2	Fuca2
Uqcrh	2.89454950552651e-19	0.209978	0.931	0.856	4.79047943164638e-15	0.icl2	Uqcrh
Zfyve9	2.98562514969575e-19	-4.67964	0.002	0.033	4.94120962274646e-15	0.icl2	Zfyve9
Dscaml1	2.9940044289933e-19	-7.28551	0.001	0.03	4.95507732998391e-15	0.icl2	Dscaml1
Tnfsf9	3.05041596929218e-19	-3.87676	0.001	0.032	5.04843842917856e-15	0.icl2	Tnfsf9
Inpp5a	3.07608090047144e-19	-0.983853	0.069	0.14	5.09091389028024e-15	0.icl2	Inpp5a
Ubl5	3.12532195607798e-19	-0.313926	0.685	0.768	5.17240783730906e-15	0.icl2	Ubl5
Rpl29	3.13904720817502e-19	0.185797	0.985	0.885	5.19512312952966e-15	0.icl2	Rpl29
Psmb3	3.21282068325113e-19	0.321557	0.655	0.628	5.31721823078062e-15	0.icl2	Psmb3
Tcn2	3.46385894693931e-19	-1.06744	0.042	0.1	5.73268655718456e-15	0.icl2	Tcn2
Dkk3	3.57802781265483e-19	-4.5966	0.001	0.031	5.92163602994375e-15	0.icl2	Dkk3
Ifi209	3.74405761774181e-19	0.660891	0.352	0.289	6.19641535736269e-15	0.icl2	Ifi209
Xrn2	3.7787308432114e-19	0.285034	0.667	0.626	6.25379954551486e-15	0.icl2	Xrn2
Cenpb	3.81354416573373e-19	-0.599792	0.068	0.139	6.31141559428933e-15	0.icl2	Cenpb
Sh3pxd2a	3.89093584608146e-19	0.454165	0.256	0.183	6.43949882526482e-15	0.icl2	Sh3pxd2a
Ucp2	4.01538144045691e-19	-0.447316	0.6	0.687	6.64545628395619e-15	0.icl2	Ucp2
Pcyt1a	4.18174455574238e-19	-0.850828	0.103	0.183	6.92078723975364e-15	0.icl2	Pcyt1a
Tmem109	4.32304860232822e-19	-0.634681	0.055	0.121	7.1546454368532e-15	0.icl2	Tmem109
2900026A02Rik	4.34597499592635e-19	-2.80698	0.007	0.043	7.19258861825811e-15	0.icl2	2900026A02Rik
Ube2h	4.4271092719069e-19	0.334037	0.637	0.609	7.32686584500592e-15	0.icl2	Ube2h
Lrg1	4.63203921782564e-19	-7.48671	0	0.029	7.66602490550144e-15	0.icl2	Lrg1
4932438H23Rik	4.76487637651933e-19	-2.99578	0.004	0.037	7.8858704031395e-15	0.icl2	4932438H23Rik
Plekha1	4.82018171469217e-19	-0.888241	0.095	0.175	7.97740073781554e-15	0.icl2	Plekha1
Palld	4.94445212566799e-19	-5.36179	0.001	0.031	8.18306826798053e-15	0.icl2	Palld
Arhgef40	5.02180935511239e-19	-5.2277	0.001	0.031	8.311094482711e-15	0.icl2	Arhgef40
Garin4	5.2224009533235e-19	-4.23799	0.001	0.031	8.64307357775039e-15	0.icl2	Garin4
Crot	5.23595117293277e-19	-0.614437	0.111	0.197	8.66549919120374e-15	0.icl2	Crot
Ppfibp1	5.35394646086503e-19	-1.55584	0.021	0.067	8.86078139273162e-15	0.icl2	Ppfibp1
Ror1	5.43131687175424e-19	-4.63901	0.002	0.032	8.98882942275326e-15	0.icl2	Ror1
Bpnt1	5.56320799202211e-19	-0.990135	0.038	0.094	9.20710922679659e-15	0.icl2	Bpnt1
Acox3	6.00829751987446e-19	-1.2968	0.053	0.115	9.94373239539224e-15	0.icl2	Acox3
Cdkn2c	6.13516371975293e-19	-1.2141	0.03	0.082	1.01536959561911e-14	0.icl2	Cdkn2c
Uchl3	6.213991726008e-19	-0.389229	0.16	0.266	1.02841563065432e-14	0.icl2	Uchl3
Tcf20	6.37135353692001e-19	0.408509	0.517	0.469	1.05445901036026e-14	0.icl2	Tcf20
Surf4	6.39261888983288e-19	-0.450254	0.179	0.289	1.05797842626734e-14	0.icl2	Surf4
Rgs12	6.72559920144665e-19	-2.14234	0.013	0.054	1.11308666783942e-14	0.icl2	Rgs12
Chka	7.28229532602745e-19	-1.08416	0.311	0.413	1.20521987645754e-14	0.icl2	Chka
Tacstd2	7.38787880938178e-19	-3.18514	0.004	0.037	1.22269394295268e-14	0.icl2	Tacstd2
Ctse	7.78528929732665e-19	0.656449	0.36	0.299	1.28846537870756e-14	0.icl2	Ctse
Cyth1	7.97129324905194e-19	0.266523	0.613	0.574	1.3192490327181e-14	0.icl2	Cyth1
H2-M2	8.10783964817725e-19	-7.95496	0	0.029	1.34184746177334e-14	0.icl2	H2-M2
Cxcr3	8.55817204166201e-19	-0.732613	0.072	0.142	1.41637747289506e-14	0.icl2	Cxcr3
Gbp4	8.95234340206424e-19	0.723309	0.28	0.211	1.48161283304163e-14	0.icl2	Gbp4
Anapc13	9.00356884774288e-19	-0.345172	0.235	0.36	1.49009064430145e-14	0.icl2	Anapc13
Plk3	9.11516742919051e-19	-0.97654	0.085	0.159	1.50856020953103e-14	0.icl2	Plk3
Atp13a2	1.02358883945915e-18	-1.30282	0.033	0.087	1.6940395293049e-14	0.icl2	Atp13a2
Glod4	1.11238174190918e-18	-0.426895	0.116	0.205	1.8409917828597e-14	0.icl2	Glod4
Ctdsp2	1.11824321495911e-18	-0.670826	0.099	0.179	1.85069252075733e-14	0.icl2	Ctdsp2
Polb	1.12004880028577e-18	-0.633751	0.133	0.224	1.85368076447295e-14	0.icl2	Polb
Zhx2	1.14134607730881e-18	-0.838038	0.239	0.339	1.88892775794608e-14	0.icl2	Zhx2
Ppig	1.19000533680235e-18	-0.497567	0.344	0.471	1.96945883240789e-14	0.icl2	Ppig
Mcur1	1.25778020539569e-18	-0.699083	0.083	0.158	2.08162623992987e-14	0.icl2	Mcur1
Ifi208	1.26002565986785e-18	1.15096	0.154	0.094	2.08534246708128e-14	0.icl2	Ifi208
Slc38a1	1.29190493981756e-18	-0.539817	0.491	0.601	2.13810267539806e-14	0.icl2	Slc38a1
Fam184a	1.3027408592457e-18	-4.05865	0.002	0.032	2.15603612205164e-14	0.icl2	Fam184a
Lap3	1.39588949555905e-18	-0.989457	0.037	0.092	2.31019711515023e-14	0.icl2	Lap3
Chdh	1.40213246182518e-18	-3.04517	0.004	0.036	2.32052922432067e-14	0.icl2	Chdh
Soga1	1.42132750890828e-18	-4.65559	0.001	0.03	2.3522970272432e-14	0.icl2	Soga1
H2aj	1.45156291127308e-18	0.199391	0.796	0.748	2.40233661815694e-14	0.icl2	H2aj
Havcr1	1.46366918558677e-18	-5.69017	0	0.028	2.4223725021461e-14	0.icl2	Havcr1
Cep63	1.48333319940387e-18	-0.805943	0.109	0.191	2.45491644501341e-14	0.icl2	Cep63
Sdf2	1.49971478274677e-18	-0.400197	0.224	0.344	2.4820279654459e-14	0.icl2	Sdf2
Eps15	1.50629048513381e-18	-0.519291	0.23	0.347	2.49291075289646e-14	0.icl2	Eps15
Ttc39b	1.52458735874832e-18	-0.540932	0.269	0.382	2.52319207872846e-14	0.icl2	Ttc39b
Vti1b	1.56669389849767e-18	-0.39205	0.196	0.308	2.59287840201364e-14	0.icl2	Vti1b
Treml4	1.61913571285592e-18	-7.63525	0	0.027	2.67966960477656e-14	0.icl2	Treml4
Hilpda	1.64983485634716e-18	-1.57961	0.067	0.131	2.73047668725455e-14	0.icl2	Hilpda
Fam43a	1.70177341058912e-18	-2.95687	0.006	0.04	2.81643499452499e-14	0.icl2	Fam43a
Arid3a	1.80673125887081e-18	-1.74614	0.018	0.062	2.9901402334312e-14	0.icl2	Arid3a
Fubp1	1.90718255321228e-18	0.446405	0.51	0.476	3.15638712556633e-14	0.icl2	Fubp1
[truncated: 75,581 more rows]

## Sheet: adt_markers_ifnar_ECTV_d1-0.2
	p_val	avg_log2FC	pct.1	pct.2	p_val_adj	cluster	gene
[truncated: 226 more rows]

[truncated: 5 more sheets: rna_markers_ifnar_ECTV_d1-0.2, adt_markers_ifna_ECTV_d1-0.2, rna_markers_ifna_ECTV_d1-0.2, adt_markers_ifnb_ECTV_d1-0.2, rna_markers_ifnb_ECTV_d1-0.2]
